# Supplementary material for: Optogenetic manipulation of Gq- and Gi/o-coupled receptor signaling in neurons and heart muscle cells
Source: eLife. 2023 Aug 17;12:e83974. doi: 10.7554/eLife.83974 (PMC10435233; doi:10.7554/eLife.83974)
Supplement: Figure 1—source data 1. [file elife-83974-fig1-data1.xlsx]

## Sheet: B
SpiRh1-Tag CFP	SpiRh1-P2A-TagCFP	Time (s)
0.813175	0.796465	1
0.818135	0.788251	2
0.807047	0.795967	3
0.818208	0.802025	4
0.814269	0.816047	5
0.810767	0.79854	6
0.826233	0.802937	7
0.825066	0.804597	8
0.823826	0.806007	9
0.83878	0.820777	10
0.818427	0.82841	11
0.81478	0.821192	12
0.837102	0.812147	13
0.827108	0.821109	14
0.823826	0.811235	15
0.836519	0.81389	16
0.828057	0.816877	17
0.84644	0.837039	18
0.830245	0.828991	19
0.850306	0.827166	20
0.836884	0.833804	21
0.851838	0.838201	22
0.850088	0.823349	23
0.834695	0.832642	24
0.851838	0.833472	25
0.848847	0.824759	26
0.856215	0.844175	27
0.857383	0.853468	28
0.852568	0.842682	29
0.866647	0.857783	30
0.853954	0.843511	31
0.855413	0.843511	32
0.859863	0.838616	33
0.863219	0.839363	34
0.854975	0.841852	35
0.873577	0.858447	36
0.859279	0.838533	37
0.883572	0.847162	38
0.877371	0.868155	39
0.878611	0.849486	40
0.86227	0.857534	41
0.876495	0.862595	42
0.87438	0.861185	43
0.871316	0.864753	44
0.857893	0.854132	45
0.878538	0.875705	46
0.894879	0.868818	47
0.878538	0.877946	48
0.87314	0.861766	49
0.876568	0.880352	50
0.898308	0.859111	51
0.879997	0.875373	52
0.875328	0.890558	53
0.883863	0.88923	54
0.881018	0.876203	55
0.901299	0.886824	56
0.896484	0.875871	57
0.880289	0.885496	58
0.885322	0.883007	59
0.900788	0.886741	60
0.894076	0.895702	61
0.892544	0.880186	62
0.890648	0.895536	63
0.88452	0.881928	64
0.901517	0.874378	65
0.891961	0.899021	66
0.890137	0.900017	67
0.89342	0.91072	68
0.89021	0.884832	69
0.899037	0.886409	70
0.888022	0.884666	71
0.913335	0.896449	72
0.909031	0.909144	73
0.89984	0.888068	74
0.924715	0.899934	75
0.909761	0.903004	76
0.914284	0.893462	77
0.906624	0.892051	78
0.910198	0.900183	79
0.906186	0.907069	80
0.919098	0.908895	81
0.919244	0.905659	82
0.913408	0.918105	83
0.912241	0.920179	84
0.93646	0.916777	85
0.908229	0.90931	86
0.926174	0.89761	87
0.913189	0.921258	88
0.916399	0.909973	89
0.917202	0.916445	90
0.921652	0.913126	91
0.938284	0.916196	92
0.907864	0.916362	93
0.925226	0.920677	94
0.92063	0.908148	95
0.912241	0.912546	96
0.929457	0.912712	97
0.931646	0.926485	98
0.912971	0.909227	99
0.941348	0.921922	100
0.955865	0.92466	101
0.946163	0.910222	102
0.93719	0.93777	103
0.924643	0.917109	104
0.926466	0.933123	105
0.929384	0.916031	106
0.93274	0.93694	107
0.942953	0.929223	108
0.934637	0.927979	109
0.931208	0.94225	110
0.926612	0.935778	111
0.949956	0.942748	112
0.940254	0.942001	113
0.950248	0.943744	114
0.94164	0.940757	115
0.953312	0.936442	116
0.949373	0.9615	117
0.949883	0.923415	118
0.952801	0.95843	119
0.945725	0.959841	120
0.943099	0.940342	121
0.950905	0.945154	122
0.940327	0.936193	123
0.952801	0.942333	124
0.937919	0.954862	125
0.944777	0.953452	126
0.937409	0.949552	127
0.964473	0.97544	128
0.94857	0.94391	129
0.944266	0.953037	130
0.953458	0.954696	131
0.949956	0.949718	132
0.960242	0.950548	133
0.959002	0.951709	134
0.959075	0.952622	135
0.96513	0.9654	136
0.964473	0.954281	137
0.949446	0.960836	138
0.971622	0.960007	139
0.959221	0.962994	140
0.959221	0.943495	141
0.964182	0.936857	142
0.957908	0.96623	143
0.959586	0.96316	144
0.972498	0.962247	145
0.942953	0.974527	146
0.964109	0.962413	147
0.977604	0.955443	148
0.966954	0.966064	149
0.962066	0.958181	150
0.958418	0.967474	151
0.956376	0.975274	152
0.964619	0.963906	153
0.958491	0.976104	154
0.965859	0.961832	155
0.965349	0.980584	156
0.966662	0.961666	157
0.973081	0.979423	158
0.964036	0.95843	159
0.962285	0.984235	160
0.965859	0.980335	161
0.94806	0.976269	162
0.971331	0.992035	163
0.972498	0.965317	164
0.976364	0.978759	165
0.964036	0.974195	166
0.9671	0.987222	167
0.975926	0.968636	168
0.971112	0.974112	169
0.973081	0.988052	170
0.988255	0.971457	171
0.981106	0.970544	172
0.990006	0.97685	173
0.997957	0.988964	174
0.980303	0.990873	175
0.97972	0.976684	176
0.989641	0.991454	177
0.969215	0.962745	178
0.967391	0.975274	179
0.97899	0.978925	180
0.976145	0.980335	181
0.978261	0.975772	182
0.975926	0.978012	183
0.963963	0.976021	184
0.989568	1.00025	185
0.97972	0.989545	186
0.961847	0.988135	187
0.96958	0.993362	188
0.985702	0.984069	189
0.990808	0.998838	190
0.975926	0.977846	191
0.990589	0.987803	192
0.982784	0.987969	193
0.980012	0.984235	194
0.994383	0.982576	195
0.997884	0.994275	196
0.970528	0.997096	197
0.989203	0.994192	198
0.967829	0.992781	199
0.992705	0.993113	200
0.990516	0.992864	201
0.97279	1.00058	202
0.976875	0.992698	203
0.988547	0.992449	204
0.98293	0.992283	205
0.973446	0.996266	206
0.995842	0.994109	207
0.994966	0.993196	208
0.98468	0.980252	209
0.985702	0.98772	210
0.978626	1.00498	211
0.969361	0.991454	212
0.991757	0.986226	213
0.998614	0.988882	214
1.00649	0.994607	215
0.988693	1.00348	216
0.992413	0.998506	217
0.972206	0.984816	218
0.990735	1.01651	219
0.987671	1.00498	220
0.996936	0.99303	221
0.99183	0.99917	222
0.993216	1.00017	223
1.01568	1.0005	224
0.983951	0.997926	225
0.984316	0.970046	226
0.999125	0.999917	227
0.989641	1	228
0.977385	1.00266	229
1.0046	0.998838	230
0.989495	1.00797	231
0.974759	0.998258	232
1.00941	1.00954	233
0.985483	1.00929	234
0.972498	0.984899	235
1	1.01344	236
1.00569	0.9922	237
1.00336	1.02041	238
1.00372	1.01319	239
0.984535	1.01718	240
1.00292	1.01211	241
1.00066	0.981248	242
0.991027	0.997345	243
0.993726	1.00738	244
0.996498	1.00332	245
1.01641	0.996598	246
1.007	1.00697	247
0.98986	0.996349	248
1.0016	1.00108	249
0.993726	1.00929	250
0.998103	1.01485	251
0.992778	1.00174	252
0.997009	0.997511	253
1.0016	1.00191	254
1.00285	1.0083	255
0.981325	1.00282	256
1.00197	1.00539	257
1.01576	1.01477	258
0.989203	0.99917	259
1.00248	1.01875	260
0.996207	1.00896	261
0.998979	0.991952	262
0.991319	1.00141	263
0.998833	0.994607	264
1.01313	1.01195	265
0.991975	1.00888	266
1.00467	1.00647	267
0.989349	1.01253	268
1.00168	1.01037	269
1.00015	1.01809	270
0.991975	1.0078	271
1.00467	1.00075	272
1.00985	0.993445	273
1.00649	1.00763	274
1.02553	1.00996	275
0.998687	1.00772	276
1.00036	0.994026	277
0.988109	1.01104	278
1.00766	1.00888	279
1.00956	1.0161	280
1.00496	1.0161	281
1.00861	1.00199	282
1.00255	1.01693	283
1.01452	1.02182	284
1.00387	1.0073	285
1.0027	1.01469	286
1.01415	1.02249	287
1.01007	0.995685	288
0.991392	0.999668	289
1.00219	1.02215	290
0.988693	1.00946	291
0.992048	1.00456	292
0.99803	1.00398	293
1.01153	1.01494	294
0.994529	1.02713	295
0.999562	1.00133	296
0.987526	1.02763	297
1.0108	1.00614	298
1.00657	1.0029	299
1.00066	1.00863	300
1.0124	0.999087	301
1.01474	1.00979	302
1.00562	1.0278	303
0.992924	1.00797	304
1.02094	1.01228	305
0.992632	1.00373	306
0.993362	1.01884	307
0.998468	1.00763	308
0.994966	1.01452	309
0.997447	1.02838	310
1.01247	1.01352	311
1.00481	1.01286	312
1.00467	1.01626	313
1.00175	1.01045	314
1.00554	1.00813	315
1.0089	1.01352	316
0.995404	1.01012	317
1.02298	1.00448	318
0.996936	1.01328	319
1.00095	1.02622	320
1.00817	1.01095	321
0.999635	1.03543	322
0.995477	1.02464	323
1.0016	1.00415	324
1.0105	1.02489	325
1.00372	1.01925	326
1.00139	1.02564	327
0.997447	1.0268	328
1.00766	1.00606	329
1.00766	1.02605	330
0.994091	1.01859	331
1.00029	1.02639	332
1.00204	1.01593	333
0.991027	1.03576	334
1.01094	1.03302	335
1.01977	0.998921	336
1.00547	1.01867	337
0.993143	1.00564	338
1.01342	1.02813	339
1.00219	1.00954	340
1.00912	1.01776	341
1.00124	1.01817	342
1.00905	1.00083	343
1.01393	1.03186	344
1.00503	1.02149	345
1.01204	1.00821	346
1.00146	1.02464	347
1.01087	1.02074	348
1.0275	1.01776	349
1.01714	1.01635	350
1.01809	1.03767	351
0.999052	1.01859	352
1.01868	1.03219	353
1.01328	1.02199	354
0.99752	1.03128	355
1.0186	1.01676	356
0.995842	1.0117	357
1.01021	1.02415	358
0.991538	1.02116	359
0.987817	1.01211	360
1.00905	1.01095	361
1.00226	1.01518	362
1.00861	1.0083	363
1.01474	1.01361	364
1.00452	1.00738	365
1.0132	1.01228	366
1.01218	0.992781	367
1.00824	1.01062	368
1.00489	1.02298	369
1.01218	1.02605	370
1.01036	1.01402	371
1.02882	1.01294	372
1.00722	0.998506	373
1.00124	1.01593	374
1.00759	1.00548	375
0.991538	1.0088	376
1.01627	1.02929	377
1.00197	1.019	378
1.01714	1.01245	379
1.02393	1.00407	380
0.997301	1.01137	381
1.00197	1.01759	382
1.00416	1.01809	383
1.01247	1.00523	384
1.00409	1.02813	385
0.986942	1.00116	386
1.01226	1.00855	387
1.00956	1.01502	388
1.00978	1.03601	389
1.01554	0.993445	390
1.01547	1.02232	391
1.00948	1.01419	392
1.00438	1.00913	393
1.00766	1.03867	394
0.993653	1.02132	395
0.998395	1.01469	396
0.995696	1.03269	397
1.00693	1.01776	398
0.991611	1.02863	399
1.01415	1.01684	400
1.00613	1.02655	401
1.01466	1.02805	402
1.00015	1.03419	403
1.0054	1.02456	404
1.00926	1.01709	405
1.0108	1.02489	406
0.99555	1.01809	407
1.01109	1.03311	408
1.00445	1.0146	409
1.00715	1.02912	410
1.00007	1.03087	411
1.00401	1.01502	412
1.00759	1.02829	413
0.997228	1.02771	414
1.01612	1.03891	415
1.00029	1.02481	416
0.995623	1.02489	417
1.00102	1.01975	418
1.00642	1.01195	419
1.01043	1.01128	420
0.99555	1.03103	421
1.01058	1.00855	422
1.00175	1.01867	423
0.999416	1.01178	424
1.00671	1.02979	425
0.993872	1.00622	426
1.00912	1.01386	427
0.997593	1.01211	428
1.00554	1.00232	429
0.994091	1.00573	430
1.00605	1.00606	431
0.993872	1.01386	432
1.00496	1.01054	433
0.993945	1.01577	434
1.0019	1.02456	435
1.00489	1.02381	436
0.98913	1.01469	437
1.00824	1.01377	438
1.01109	1.0346	439
1.00678	1.02307	440
0.990079	1.02473	441
1	0.996349	442
1.00766	1.02025	443
1.00737	1.02323	444
0.99927	1.00083	445
1.00788	1.00714	446
1.00066	1.0161	447
1.01663	1.01294	448
0.994893	1.02381	449
1.00233	1.01527	450
1.00292	1.02705	451
1.00569	1.0146	452
1.00109	1.01966	453
1.00314	1.01718	454
0.994748	1.01062	455
1.01787	1.00548	456
0.998249	1.02655	457
1.00598	1.02323	458
0.998176	1.01319	459
0.997593	1.02647	460
1.00357	1.02887	461
1.01007	1.01104	462
1.0054	1.0268	463
0.999125	1.01975	464
0.985118	1.02149	465
1.00409	1.00116	466
0.981908	1.02506	467
0.991538	1.01626	468
1.00496	1.01427	469
1.01656	1.01676	470
0.996863	1.00224	471
1.00175	1.00431	472
1.00409	1.01021	473
1.00511	1.03485	474
1.00511	1.02788	475
1.00781	1.00689	476
0.997155	1.01643	477
0.986358	0.998589	478
1.01517	1.01817	479
1.01094	1.00846	480
0.998906	1.00755	481
1.00124	1.01328	482
1.00131	1.00456	483
1.00226	1.00987	484
0.995185	0.997262	485
0.991246	1.0317	486
1.0019	1.01726	487
1.01065	1.04298	488
0.996061	1.01029	489
1.0027	1.01294	490
0.99307	1.01991	491
1.0232	1.02622	492
0.997811	1.00631	493
0.992632	1.00589	494
1.00919	1.00904	495
1.01072	1.01684	496
0.989203	1.02249	497
0.998322	1.03112	498
0.991392	1.00747	499
0.999781	1.01344	500
1.00416	1.01178	501
0.984899	1.03062	502
0.993653	1.02439	503
0.994529	0.996349	504
1.00292	1.01751	505
0.997666	1.0239	506
0.989787	1.0117	507
0.991465	1.01701	508
1.00036	1.00116	509
0.99431	1.02564	510
1.00839	1.02174	511
1.00058	1.01809	512
0.999635	1.00108	513
0.995258	1.04008	514
1.00233	0.996432	515
0.996571	1.01942	516
0.984024	1.00548	517
0.975124	1.01601	518
0.995112	1.01128	519
0.99927	1.02829	520
0.988766	1.01402	521
0.990954	1.03078	522
0.996717	1.03136	523
0.999854	1.0029	524
0.998979	1.00266	525
0.9822	1.03045	526
0.98096	0.998755	527
0.984899	1.00382	528
0.99803	1.03244	529
0.986067	1.02049	530
0.997009	1.0263	531
0.987817	1.02688	532
1.00722	1.01195	533
0.990881	1.02647	534
0.98986	1.00581	535
1.00802	1.02099	536
0.996644	1.00531	537
0.989203	1.0112	538
0.991027	0.998506	539
0.99752	1.01029	540
0.992559	1.02498	541
0.99927	1.00697	542
0.986504	1.01203	543
0.988693	1.00622	544
0.990735	1.01178	545
0.984389	1.00938	546
1.0143	1.00647	547
0.976437	1.00141	548
0.992851	1.01477	549
1	1.00846	550
	1.00722	551
	1.01975	552
0.981908	1.00871	553	1.01905
0.988985	1.00714	554	1.01236
0.994602	1.00946	555	1.01649
0.991975	1.01377	556	1.01323
0.983878	1.01825	557	1.01407
0.983294	1.02041	558	1.00984
0.988109	1.01269	559	1.01743
0.988547	1.00763	560	1.01095
0.977823	1.01734	561	1.02486
1.00525	1.01676	562	1.01841
0.993872	0.997262	563	1.01115
0.986358	1.00116	564	1.0217
0.98468	1.0039	565	1.01085
0.975562	1.00348	566	1.0127
0.981981	1.00224	567	1.0082
0.986212	0.997677	568	1.01962
0.987015	1.01045	569	1.0127
1.00708	0.998921	570	1.02382
0.988766	0.993528	571	1.01606
0.984389	0.99469	572	1.01041
0.991173	1.01834	573	1.00611
0.982784	0.984899	574	1.00621
0.983294	0.999668	575	1.00316
0.980668	1.01568	576	1.00289
0.97848	1.00846	577	1.0135
0.979501	1.00315	578	1.01401
0.977969	0.994026	579	1.01387
0.975999	1.0068	580	1.01424
0.975926	0.993279	581	1
0.986139	0.995602	582	1.01004
0.997155	1.00747	583	1.00967
0.980668	1.00755	584	1.01851
0.984608	1.00664	585	1.00994
0.987015	0.98606	586	1.01666
0.99555	1.00257	587	1.0086
0.977385	0.993777	588	1.01028
0.981033	1.00183	589	1.02993
0.992194	1.00041	590	1.00632
0.990589	0.995685	591	1.01263
0.979282	1.01261	592	1.01958
0.983221	0.996847	593	1.00897
0.990225	0.992449	594	1.01145
0.983294	1.0195	595	1.00118
0.984024	0.996266	596	1.01747
0.968704	1.00448	597	1.01579
0.963744	0.989462	598	1.01011
0.994383	0.991122	599	0.995801
0.964765	0.999336	600	1.01196
0.991173	1.0151	601	1.00746
0.982857	0.985729	602	0.996977
0.98913	1.00689	603	1.01448
0.970163	1.01734	604	1.00628
0.991538	1.01112	605	1.00101
0.967902	1.02348	606	0.997514
0.961336	1.00954	607	1.02241
0.972498	1.0151	608	0.996271
0.960826	0.997262	609	1.00937
0.976437	0.985563	610	1.00215
0.990881	1.01278	611	1.00393
0.990516	1.001	612	0.999463
0.985848	0.995105	613	1.00873
0.97082	0.982824	614	1.00773
0.981762	1.02141	615	1.00286
0.982419	1.00962	616	1.01078
0.977021	1.01045	617	1.00739
0.963598	0.994524	618	1.00558
0.995258	0.997262	619	1.00336
0.972133	0.98548	620	0.994054
0.97279	1.00058	621	1.01031
0.970455	1.01701	622	1.00947
0.978699	0.999668	623	0.991401
0.985629	0.988882	624	1.00309
0.980522	1.00871	625	0.999563
0.968486	0.999585	626	1.01458
0.977969	0.987139	627	0.995532
0.974613	1.01236	628	1.00185
0.981835	1.00448	629	0.998656
0.988839	0.991537	630	1.00034
0.960023	1.01253	631	0.989923
0.974467	0.993279	632	1.01018
0.975416	0.980916	633	1.00064
0.971622	0.992366	634	0.985018
0.990006	1.00564	635	0.998119
0.987526	1.00714	636	0.990359
0.985848	1.01328	637	1
0.966954	0.980418	638
0.96513	0.98689	639
0.981398	0.998838	640	2.66409
0.970236	1.00108	641	2.8265
0.988547	0.987388	642	2.95788
0.984899	0.995188	643	3.09798
0.990808	0.986392	644	3.20067
0.989349	0.991205	645	3.2518
0.97775	1	646	3.33362
		647	3.36144
		648	3.38764
1.00416	1.00116	649	3.42281
1.01955	1.00075	650	3.3864
1.04486	0.985065	651	3.36698
1.08754	1.00531	652	3.35737
1.09542	1.01319	653	3.31323
1.15852	1.00531	654	3.26876
1.19653	1.00855	655	3.23033
1.2187	1.02298	656	3.19463
1.27364	1.0341	657	3.12973
1.30004	1.00639	658	3.07864
1.32966	1.02589	659	3.01743
1.37168	1.02514	660	2.9612
1.37708	1.01303	661	2.89281
1.40743	1.00664	662	2.85939
1.44587	1.00946	663	2.78203
1.4466	1.02332	664	2.72442
1.45156	1.01958	665	2.65469
1.45287	1.03277	666	2.60279
1.48373	1.02356	667	2.54599
1.45893	1.00855	668	2.46523
1.47352	1.03385	669	2.42439
1.49212	1.02572	670	2.36177
1.46914	1.02074	671	2.29093
1.45791	1.00738	672	2.25784
1.45835	1.00232	673	2.19573
1.42574	1.01867	674	2.15405
1.40728	1.01435	675	2.08267
1.40057	1.04099	676	2.03719
1.40064	1.03219	677	2.00786
1.39605	1.0122	678	1.94619
1.37598	1.02821	679	1.9046
1.3762	1.01261	680	1.85069
1.34338	1.01203	681	1.81888
1.34513	1.00407	682	1.78388
1.34184	1.00772	683	1.7351
1.29282	1.01444	684	1.71441
1.29421	1.00033	685	1.66994
1.26853	1.00232	686	1.64847
1.26226	1.01734	687	1.60615
1.27021	1.02025	688	1.57437
1.24497	1.02348	689	1.55109
1.23753	1.00307	690	1.53184
1.24095	1.01875	691	1.49929
1.22002	0.994109	692	1.48687
1.20039	0.996432	693	1.44713
1.18843	1.01859	694	1.4178
1.19317	1.0073	695	1.40457
1.19638	0.99079	696	1.38455
1.15925	1.0107	697	1.35717
1.16903	0.980003	698	1.34945
1.14546	0.982576	699	1.33981
1.15436	0.9961	700	1.31293
1.14211	1.00124	701	1.28925
1.1103	0.990458	702	1.27111
1.12022	1.001	703	1.25495
1.10191	0.978344	704	1.24054
1.10476	0.988799	705	1.23611
1.11067	1.00017	706	1.23027
1.09126	0.992366	707	1.213
1.08681	0.983239	708	1.1994
1.08382	0.995353	709	1.18596
1.0782	0.995685	710	1.16873
1.08477	0.98465	711	1.17387
1.0677	0.976767	712	1.15045
1.05924	1.0049	713	1.14508
1.06369	0.983986	714	1.1219
1.07558	0.993362	715	1.13329
1.04844	0.9922	716	1.12808
1.05376	0.987637	717	1.12076
1.05231	0.990126	718	1.10114
1.0418		719	1.09624
1.04012		720	1.08804
1.06507	1.21689	721	1.09775
1.03742	1.34052	722	1.0914
1.02327	1.44084	723	1.07763
1.017	1.5624	724	1.0652
1.02269	1.68586	725	1.05391
1.04173	1.83414	726	1.07326
1.02451	1.9186	727	1.06423
1.02218	2.03916	728	1.04337
1.02116	2.15126	729	1.06009
1.00744	2.22527	730	1.04236
1.01036	2.25473	731	1.04038
1.00212	2.30717	732	1.03178
0.991027	2.37089	733	1.02902
0.996863	2.39471	734	1.0266
1.00175	2.40889	735	1.02875
1.00328	2.41893	736	1.02012
1.00102	2.40475	737	1.01596
0.994966	2.43171	738	1.01283
0.998322	2.38691	739	1.00729
0.991611	2.37546	740	1.01394
1.00708	2.36177	741	1.02056
0.970236	2.3392	742	1.01606
0.978553	2.28792	743	1.00823
0.992778	2.25772	744	1.00635
0.972498	2.20212	745	0.999597
0.992997	2.17931	746	1.00682
0.974322	2.13691	747	0.996036
0.981544	2.08057	748	0.995297
0.978115	2.08148	749	0.997783
0.979428	2.0268	750	0.988042
0.974322	2.01427	751	0.991669
0.986067	1.94333	752	0.990729
0.965932	1.92524	753	0.978267
0.96068	1.86882	754	0.989889
0.968267	1.85405	755	0.989889
0.97009	1.8192	756	0.991166
0.969653	1.7846	757	0.99916
0.970455	1.74577	758	0.984951
0.988109	1.72453	759	0.984918
0.964036	1.68943	760	0.970272
0.97972	1.64462	761	0.978737
0.967172	1.62488	762	0.978367
0.964327	1.61318	763	0.981357
0.965713	1.56007	764	0.988512
0.95944	1.54837	765	0.980685
0.96761	1.51942	766	0.979106
0.970528	1.5078	767	0.979845
0.979282	1.4659	768	0.978636
0.980231	1.44739	769	0.975176
0.991975	1.43636	770	0.973967
0.966443	1.4201	771	0.965838
0.976729	1.39587	772	0.965301
0.961482	1.38409	773	0.969332
0.961263	1.36542	774	0.971851
0.959367	1.35256	775	0.982096
0.972571	1.32451	776	0.962849
0.951123	1.31024	777	0.969634
0.954771	1.30037	778	0.973362
0.963817	1.30327	779	0.974303
0.955719	1.27406	780	0.980584
0.959586	1.25913	781	0.961942
0.965276	1.25307	782	0.97605
0.943391	1.24585	783	0.959019
0.942296	1.2237	784	0.962345
0.969288	1.22461	785	0.965637
0.951707	1.19872	786	0.95996
0.958345	1.21258	787	0.968391
0.953823	1.193	788	0.965133
0.963817	1.17234	789	0.952939
0.960315	1.16935	790	0.979778
0.951634	1.19109	791	0.969667
0.951342	1.15931	792	0.962781
0.957251	1.15068	793	0.961538
0.963817	1.13243	794	0.960296
0.93471	1.14379	795	0.954417
0.939306	1.11658	796	0.964091
0.950248	1.13649	797	0.96211
0.966808	1.11849	798	0.958952
0.959367	1.09882	799	0.965301
0.952728	1.10496	800	0.969735
0.947038	1.10928	801	0.960094
0.956668	1.0931	802	0.952771
0.950029	1.11434	803	0.955123
0.957543	1.08712	804	0.958381
0.957324	1.08862	805	0.967417
0.938649	1.07675	806	0.966208
0.959586	1.05335	807	0.953611
0.941786	1.07874	808	0.964528
0.95426	1.06713	809	0.962546
0.949373	1.07526	810	0.959355
0.946819	1.05841	811	0.954955
0.958783	1.06331	812	0.957642
0.937628	1.0536	813	0.951696
0.95375	1.08397	814	0.963554
0.964182	1.05584	815	0.966174
0.953604	1.03784	816	0.954417
0.943099	1.05202	817	0.961975
0.954479	1.05227	818	0.953376
0.950613	1.05285	819	0.950823
0.945579	1.05642	820	0.953409
0.926174	1.03128	821	0.946019
0.937992	1.03966	822	0.97222
0.936169	1.0341	823	0.960396
0.950248	1.02041	824	0.962479
0.953093	1.03808	825	0.9522
0.942369	1.03452	826	0.947531
0.949737	1.03194	827	0.946859
0.953239	1.01402	828	0.968089
0.9555	1.0258	829	0.94864
0.9671	1.01187	830	0.953947
0.95995	1.0229	831	0.961807
0.942005	1.02298	832	0.970238
0.953166	1.00855	833	0.94743
0.958929	1.02489	834	0.961471
	1.00017	835	0.951293
	1.00431	836	0.941485
1.37562	0.988218	837	0.95089
1.42844	1.01411	838	0.961874
1.51284	0.998838	839	0.94958
1.57331	1.0068	840	0.947397
1.65057	1.01684	841	0.955223
1.67763	1.00091	842	0.945952
1.69638	0.999585	843	0.953577
1.73534	1.01236	844	0.95388
1.76094	0.99776	845	0.960094
1.7403	0.981165	846	0.94874
1.76328	0.989047	847	0.962076
1.73964	0.994773	848	0.958851
1.75554	0.996681	849	0.952435
1.73607	0.985314	850	0.959624
1.70506	0.985231	851	0.946826
1.71163	0.990292	852	0.954249
1.70032	0.991288	853	0.949983
1.65692	0.984733	854	0.948942
1.65845	0.991952	855	0.953107
1.62423	0.99162	856	0.948606
1.6033	0.978095	857	0.954081
1.56981	0.986807	858	0.951192
1.53837	0.972287	859	0.947464
1.50795	0.97461	860	0.944306
1.50788	0.984484	861	0.954854
1.47126	0.985563	862	0.955694
1.44273	0.999834	863	0.960867
1.44011	0.976933	864	0.947497
1.39597	0.990956	865	0.950789
1.38153	0.9922	866	0.938092
1.37241	0.982576	867	0.956869
1.33856	0.972287	868	0.944038
1.34141	0.982244	869	0.957138
1.3026	0.988135	870	0.937555
1.27276	0.964155	871	0.947934
1.27458	0.975108	872	0.948337
1.26131	0.980003	873	0.964763
1.24358	0.987056	874	0.951327
1.22476	0.970793	875	0.944172
1.20266	0.970627	876	0.947397
1.20251	0.970959	877	0.950655
1.18683	0.954862	878	0.951764
1.17377	0.983156	879	0.943063
1.15414	0.977099	880	0.957709
1.14517	0.971374	881	0.94827
1.15013	0.987305	882	0.948371
1.12431		883	0.95566
1.11482		884	0.93742
1.12278	1.23216	885	0.942291
1.09454	1.29431	886	0.949714
1.10118	1.37811	887	0.955223
1.1111	1.43752	888	0.953242
1.08812	1.46225	889	0.947766
1.082	1.49627	890	0.945751
1.058	1.51825	891	0.948203
1.06412	1.54638	892	0.942761
1.04494	1.55584	893	0.944239
1.07069	1.55327	894	0.947397
1.04479	1.55999	895	0.945616
1.03078	1.52108	896	0.950151
1.04231	1.51693	897	0.952032
1.04406	1.51153	898	0.946826
1.03071	1.50556	899	0.954787
1.02612	1.50631	900	0.950722
1.00292	1.47461	901	0.957642
1.01598	1.45412	902	0.941821
1.00999	1.46391	903	0.947733
1.00357	1.40914	904	0.945549
1.02772	1.37994	905	0.94219
1.0116	1.39612	906	0.952368
1.0124	1.34965	907	0.940477
1.00372	1.33347	908	0.949647
1.00102	1.31372	909	0.948808
1.0062	1.29273	910	0.938965
0.992267	1.28203	911	0.941552
1.00131	1.26427	912	0.952032
0.97972	1.24353	913	0.930534
0.988839	1.23125	914	0.946758
0.965932	1.21225	915	0.94612
0.986504	1.19018	916	0.921498
0.993507	1.18428	917	0.942425
0.962504	1.18644	918	0.95089
0.971695	1.17715	919	0.943601
0.984243	1.17151	920	0.93349
0.982054	1.13541	921	0.941216
0.973446	1.1184	922	0.944273
0.971914	1.13724	923	0.944777
0.961555	1.12272	924	0.938294
0.985775	1.1038	925	0.931676
0.979428	1.10305	926	0.93124
0.965641	1.09061	927	0.944575
0.951342	1.08007	928	0.939368
0.968777	1.05999	929	0.948035
0.962722	1.08264	930	0.941854
0.960388	1.06206	931	0.933221
0.971914	1.05443	932	0.92872
0.962285	1.06895	933	0.932684
0.956668	1.05194	934	0.936648
0.960899	1.05958	935	0.934229
0.978917	1.03194	936	0.939839
0.957908	1.03302	937	0.959456
0.955355	1.0341	938	0.932885
0.957397	1.02	939	0.93527
0.962722	1.02622	940	0.939268
0.942515	1.00149	941	0.949547
0.9493	1.02705	942	0.93994
0.94485	1.0034	943	0.932919
0.957032	1.00971	944	0.938596
0.959294	1.02298	945	0.934095
0.953166	1.01568	946	0.930803
0.962285	1.00166	947	0.9391
0.961628	0.992781	948	0.941518
0.939233	0.978842	949	0.936513
0.942588	0.997179	950	0.932684
0.94485	0.99303	951	0.940981
0.959586	0.97851	952	0.931407
0.955938	0.992864	953	0.938159
0.94288	1.00041	954	0.935136
0.951707	1.00274	955	0.944138
0.953896	0.982078	956	0.940712
0.946309	0.982244	957	0.944273
0.957908	0.983654	958	0.936177
0.942078	1.00407	959	0.943702
0.950613	0.988218	960	0.927007
0.951999	0.999502	961	0.938361
0.954187	0.993196	962	0.949211
0.923548	0.984816	963	0.937521
0.935877	0.970793	964	0.939906
0.945069	0.968885	965	0.935539
0.929165	0.990375	966	0.935136
0.949883	0.97378	967	0.940746
0.942661	0.987637	968	0.93779
0.939743	0.974195	969	0.933087
0.945142	0.973199	970	0.933692
0.931573	0.981414	971	0.933994
0.95054	0.958513	972	0.919281
0.949883	0.957849	973	0.932718
0.942224	0.977763	974	0.937185
0.942442	0.954033	975	0.937723
0.937774	0.965649	976	0.930635
0.942151	0.972204	977	0.926839
0.954698	0.964404	978	0.929526
0.940108	0.967308	979	0.931911
0.940619	0.969051	980	0.938663
0.923475	0.955858	981	0.936144
0.937555	0.959675	982	0.92264
0.934418	0.96233	983	0.935002
0.924351	0.9576	984	0.929896
0.937409	0.958098	985	0.919684
0.936169	0.948639	986	0.918878
0.937774	0.948888	987	0.93255
0.945069	0.960587	988	0.936077
0.938211	0.970461	989	0.937521
0.946819	0.952871	990	0.820255
0.949737	0.96457	991
0.9404	0.956605	992
0.923621	0.961334	993
0.942661	0.967889	994
0.925007	0.959343	995
0.942442	0.965317	996
0.923475	0.975025	997
0.943099	0.967972	998
0.948132	0.956854	999
0.930624	0.958596	1000
0.935293	0.95843	1001
0.942078	0.952705	1002
0.935585	0.943827	1003
0.936388	0.952705	1004
0.932521	0.957434	1005
0.924424	0.952041	1006
0.933251	0.956771	1007
0.93646	0.964321	1008
0.927415	0.958845	1009
0.934637	0.943744	1010
0.926174	0.961334	1011
0.931865	0.958264	1012
0.917858	0.942748	1013
0.930843	0.958679	1014
0.924788	0.964238	1015
0.944777	0.957766	1016
0.939743	0.941338	1017
0.919025	0.956024	1018
0.935658	0.950714	1019
0.927852	0.943412	1020
0.905457	0.967806	1021
0.92457	0.969881	1022
0.915816	0.954281	1023
0.932521	0.948141	1024
0.924861	0.968802	1025
0.918369	0.931713	1026
0.94485	0.941006	1027
0.926174	0.950133	1028
0.92705	0.958181	1029
0.939524	0.941669	1030
0.914794	0.952041	1031
0.917348	0.936193	1032
0.935366	0.95619	1033
0.924643	0.959841	1034
0.908156	0.941586	1035
0.923475	0.953535	1036
0.922016	0.94084	1037
0.927123	0.961998	1038
0.92581	0.969051	1039
0.927342	0.95005	1040
0.924715	0.951709	1041
0.92581	0.955858	1042
0.922381	0.945818	1043
0.922454	0.953701	1044
0.911439	0.966562	1045
0.92384	0.955941	1046
0.920776	0.963906	1047
0.9226	0.946731	1048
0.91246	0.968138	1049
0.904435	0.962579	1050
0.928582	0.939512	1051
0.92136	0.941835	1052
0.917493	0.958015	1053
0.915232	0.937272	1054
0.91691	0.957103	1055
0.920557	0.939014	1056
0.914502	0.934617	1057
0.91443	0.95536	1058
0.916034	0.953535	1059
0.932302	0.938765	1060
0.915597	0.941752	1061
0.909323	0.945901	1062
0.906916	0.928228	1063
0.915159	0.941586	1064
0.923111	0.945403	1065
0.920411	0.940093	1066
0.919098	0.946067	1067
0.915961	0.939097	1068
0.895463	0.947727	1069
0.924934	0.951543	1070
0.917566	0.949137	1071
0.908666	0.931879	1072
0.904654	0.935861	1073
0.923548	0.938102	1074
0.921433	0.942084	1075
0.903122	0.948058	1076
0.905748	0.933953	1077
0.908666	0.922337	1078
0.910053	0.938765	1079
0.917129	0.945237	1080
0.912898	0.954779	1081
0.919098	0.944491	1082
0.922819	0.941918	1083
0.919244	0.938682	1084
0.903268	0.943744	1085
0.916618	0.942914	1086
0.906916	0.951211	1087
0.915232	0.925241	1088
0.9226	0.945735	1089
0.895098	0.942582	1090
0.91618	0.937936	1091
0.920193	0.939678	1092
0.917785	0.937521	1093
0.909469	0.918935	1094
0.923694	0.947312	1095
0.908739	0.945984	1096
0.908739	0.939844	1097
0.907718	0.932708	1098
0.904217	0.939512	1099
0.907791	0.938682	1100
0.901007	0.922751	1101
0.916253	0.933372	1102
0.915232	0.935197	1103
0.903998	0.929472	1104
0.913408		1105
0.905311		1106
0.908302		1107

## Sheet: C
SpiRh1	SpiRh1[S186F]	Time (s)
1.06835	1.1179	1
1.06835	1.11871	2
1.08071	1.12472	3
1.07887	1.12623	4
1.06927	1.12193	5
1.06828	1.1042	6
1.07836	1.11337	7
1.06512	1.1134	8
1.06589	1.10894	9
1.0755	1.11213	10
1.08625	1.12372	11
1.08218	1.12056	12
1.07374	1.1082	13
1.07059	1.11125	14
1.06776	1.10763	15
1.06135	1.10937	16
1.06274	1.11438	17
1.07587	1.11394	18
1.0678	1.11098	19
1.06047	1.1082	20
1.06571	1.10907	21
1.07477	1.10605	22
1.07631	1.11166	23
1.06065	1.11562	24
1.0685	1.1084	25
1.05442	1.10349	26
1.07711	1.10873	27
1.06501	1.11122	28
1.08104	1.10319	29
1.05904	1.11085	30
1.06736	1.10682	31
1.07491	1.11236	32
1.07664	1.11955	33
1.06776	1.10007	34
1.07286	1.11313	35
1.06644	1.11095	36
1.07708	1.10877	37
1.05614	1.09758	38
1.07084	1.1047	39
1.06014	1.11575	40
1.05757	1.10974	41
1.0663	1.09778	42
1.07136	1.10789	43
1.06149	1.11441	44
1.07051	1.10074	45
1.06784	1.10175	46
1.0645	1.10699	47
1.08042	1.10175	48
1.05867	1.10907	49
1.05416	1.11485	50
1.05486	1.10863	51
1.06956	1.09483	52
1.06494	1.09919	53
1.07788	1.11458	54
1.06839	1.09053	55
1.05401	1.11206	56
1.06721	1.10339	57
1.06274	1.10353	58
1.05625	1.11619	59
1.06516	1.09342	60
1.05654	1.09738	61
1.05746	1.10134	62
1.04525	1.1038	63
1.05398	1.10161	64
1.0689	1.09083	65
1.05365	1.10094	66
1.05651	1.10897	67
1.05742	1.10632	68
1.06032	1.09389	69
1.06707	1.09389	70
1.05885	1.10084	71
1.05992	1.10272	72
1.06498	1.10914	73
1.06487	1.10222	74
1.06281	1.10218	75
1.05383	1.09845	76
1.05816	1.09029	77
1.05471	1.10306	78
1.05244	1.09681	79
1.04899	1.0957	80
1.06215	1.09449	81
1.05211	1.10742	82
1.05948	1.09721	83
1.05409	1.08996	84
1.0586	1.09731	85
1.06908	1.09694	86
1.0561	1.10265	87
1.05739	1.10034	88
1.0586	1.09577	89
1.06556	1.09788	90
1.06336	1.10336	91
1.06219	1.104	92
1.0594	1.08865	93
1.05592	1.10107	94
1.06615	1.09876	95
1.05442	1.0998	96
1.05904	1.10296	97
1.06347	1.09637	98
1.06105	1.09143	99
1.05863	1.09614	100
1.04763	1.09328	101
1.05574	1.10202	102
1.0506	1.09899	103
1.06846	1.08636	104
1.04991	1.09866	105
1.0564	1.09113	106
1.06333	1.0998	107
1.05753	1.09718	108
1.0572	1.09553	109
1.05442	1.08908	110
1.05519	1.09358	111
1.05676	1.09583	112
1.05438	1.09274	113
1.06391	1.07168	114
1.05394	1.09154	115
1.05607	1.09688	116
1.05563	1.09694	117
1.06032	1.08744	118
1.06421	1.09815	119
1.05878	1.08737	120
1.05574	1.09043	121
1.05599	1.09053	122
1.05801	1.08388	123
1.0528	1.09768	124
1.05475	1.09059	125
1.05042	1.08844	126
1.06347	1.08304	127
1.05951	1.09221	128
1.04987	1.09684	129
1.05035	1.09328	130
1.05955	1.08603	131
1.03913	1.09516	132
1.03975	1.09412	133
1.0498	1.09362	134
1.05013	1.09207	135
1.05735	1.08969	136
1.06608	1.07618	137
1.04914	1.09251	138
1.06168	1.08421	139
1.05093	1.09281	140
1.04202	1.09533	141
1.04793	1.08546	142
1.05258	1.09207	143
1.05504	1.08347	144
1.04998	1.07669	145
1.03821	1.08569	146
1.05251	1.08183	147
1.05097	1.07508	148
1.04411	1.09248	149
1.05882	1.08928	150
1.04213	1.09006	151
1.0451	1.09197	152
1.04672	1.08378	153
1.05464	1.09338	154
1.04547	1.06953	155
1.04921	1.09338	156
1.0535	1.07998	157
1.05383	1.08415	158
1.04492	1.08183	159
1.04283	1.08519	160
1.04789	1.08465	161
1.04529	1.09244	162
1.04459	1.08572	163
1.04228	1.08441	164
1.06153	1.09449	165
1.03539	1.08045	166
1.04455	1.08892	167
1.04972	1.08126	168
1.04672	1.08764	169
1.03898	1.08576	170
1.03572	1.08781	171
1.04052	1.08747	172
1.05299	1.07988	173
1.04455	1.07756	174
1.04833	1.09053	175
1.05361	1.0916	176
1.03113	1.07336	177
1.04367	1.07766	178
1.03513	1.08546	179
1.05533	1.07447	180
1.04078	1.0826	181
1.0403	1.08767	182
1.04756	1.08569	183
1.04041	1.07504	184
1.04092	1.08136	185
1.03975	1.07827	186
1.04521	1.08334	187
1.03909	1.08163	188
1.03803	1.07309	189
1.03451	1.07571	190
1.04309	1.08398	191
1.04217	1.06913	192
1.0407	1.09741	193
1.05515	1.06658	194
1.02699	1.0779	195
1.0498	1.07195	196
1.0432	1.08683	197
1.03245	1.07175	198
1.02996	1.06466	199
1.04719	1.07454	200
1.03909	1.06211	201
1.03898	1.07679	202
1.04265	1.08374	203
1.03458	1.07518	204
1.02937	1.0777	205
1.04411	1.07817	206
1.0429	1.07403	207
1.03106	1.07696	208
1.04221	1.07689	209
1.04411	1.08693	210
1.04243	1.07199	211
1.04807	1.08509	212
1.03513	1.07299	213
1.03788	1.07568	214
1.03476	1.07733	215
1.02185	1.07366	216
1.04899	1.07655	217
1.02681	1.0743	218
1.03469	1.06654	219
1.03916	1.07477	220
1.03154	1.07229	221
1.03421	1.07592	222
1.04243	1.07477	223
1.03165	1.06943	224
1.04364	1.06903	225
1.03183	1.06967	226
1.03781	1.07548	227
1.02978	1.06997	228
1.02996	1.07545	229
1.02424	1.07796	230
1.0377	1.06661	231
1.03663	1.06849	232
1.04492	1.07387	233
1.03649	1.069	234
1.03484	1.06483	235
1.03652	1.06816	236
1.03623	1.0658	237
1.03297	1.07424	238
1.03528	1.06718	239
1.0304	1.05788	240
1.04045	1.06617	241
1.03858	1.07763	242
1.04338	1.06869	243
1.03957	1.06611	244
1.03597	1.06795	245
1.03425	1.06339	246
1.04059	1.0611	247
1.02123	1.06711	248
1.02086	1.07702	249
1.02688	1.07121	250
1.03949	1.05025	251
1.02831	1.05899	252
1.0304	1.05825	253
1.03924	1.06893	254
1.0169	1.05734	255
1.02824	1.07242	256
1.03216	1.06913	257
1.03616	1.06134	258
1.02963	1.06943	259
1.03234	1.07242	260
1.03531	1.0647	261
1.04276	1.06722	262
1.02662	1.07276	263
1.03113	1.07165	264
1.02259	1.06402	265
1.02835	1.06245	266
1.02908	1.05872	267
1.0352	1.06675	268
1.02383	1.06134	269
1.02306	1.06802	270
1.03997	1.0649	271
1.0315	1.08032	272
1.03062	1.06211	273
1.02838	1.0559	274
1.02387	1.06167	275
1.03062	1.06886	276
1.02182	1.06792	277
1.03003	1.05492	278
1.02857	1.069	279
1.03854	1.07481	280
1.02207	1.06873	281
1.02699	1.0476	282
1.02405	1.06879	283
1.02508	1.06493	284
1.01705	1.06164	285
1.02292	1.06144	286
1.02765	1.06231	287
1.0165	1.05425	288
1.02805	1.0652	289
1.02416	1.06087	290
1.02992	1.06822	291
1.03308	1.06198	292
1.02277	1.06342	293
1.02233	1.06345	294
1.02747	1.05855	295
1.03172	1.05173	296
1.02703	1.06124	297
1.01173	1.06379	298
1.03278	1.05862	299
1.01126	1.05163	300
1.03766	1.05788	301
1.0352	1.06423	302
1.01914	1.0432	303
1.03201	1.06325	304
1.01907	1.06564	305
1.03421	1.06285	306
1.02868	1.06271	307
1.02028	1.04985	308
1.02611	1.0605	309
1.02141	1.05724	310
1.0136	1.06191	311
1.02438	1.05697	312
1.0271	1.06033	313
1.03051	1.0609	314
1.01492	1.05415	315
1.01723	1.06177	316
1.02101	1.05301	317
1.02354	1.04955	318
1.02835	1.05613	319
1.01767	1.04891	320
1.007	1.05035	321
1.02061	1.05757	322
1.02042	1.04263	323
1.02937	1.05559	324
1.02871	1.04461	325
1.02622	1.04783	326
1.01078	1.04058	327
1.03183	1.05872	328
1.01976	1.05768	329
1.02123	1.056	330
1.01445	1.05768	331
1.00968	1.04958	332
1.0183	1.05344	333
1.02339	1.0526	334
1.02809	1.05539	335
1.01357	1.05102	336
1.01309	1.04148	337
1.02486	1.05697	338
1.01863	1.05966	339
1.02596	1.05324	340
1.01441	1.04679	341
1.01525	1.04306	342
1.01734	1.05321	343
1.02145	1.05502	344
1.01089	1.0386	345
1.02526	1.04743	346
1.03249	1.05475	347
1.00979	1.04625	348
1.0132	1.04656	349
1.02471	1.05344	350
1.02413	1.05358	351
1.01929	1.04515	352
1.00682	1.05264	353
1.00693	1.0437	354
1.02226	1.04934	355
1.03088	1.05321	356
1.01437	1.04847	357
1.02537	1.05082	358
1.01954	1.04716	359
1.01925	1.03772	360
1.01544	1.05066	361
1.018	1.0484	362
1.02145	1.0441	363
1.01646	1.04075	364
1.02266	1.04679	365
1.01808	1.05052	366
1.01195	1.04471	367
1.0077	1.05153	368
1.02182	1.06194	369
1.00546	1.03789	370
1.00455	1.04887	371
1.01687	1.04484	372
1.00528	1.05059	373
1.00902	1.03346	374
1.01914	1.04306	375
1.0048	1.03359	376
1.01067	1.04101	377
1.01441	1.04447	378
1.01008	1.03618	379
0.998753	1.05536	380
1.01129	1.04867	381
1.01342	1.04434	382
1.00187	1.04908	383
1.01804	1.04515	384
0.99846	1.03591	385
1.02255	1.05049	386
1.01397	1.04054	387
1.02196	1.04834	388
1.00664	1.05129	389
1.02042	1.04038	390
0.999927	1.04491	391
1.01305	1.04014	392
0.997873	1.04068	393
1.00851	1.05388	394
1.00609	1.04417	395
1.01683	1.04232	396
1.00433	1.04112	397
1.00521	1.039	398
1.01122	1.04206	399
1.01192	1.03833	400
1.01313	1.03658	401
1.01269	1.04316	402
0.996186	1.04414	403
1.00572	1.05445	404
1.00634	1.05314	405
1.01063	1.04189	406
1.01657	1.03725	407
1.01093	1.04162	408
1.00323	1.03	409
1.00429	1.0394	410
1.00741	1.03792	411
1.01144	1.03624	412
1.00356	1.03178	413
1.00202	1.04733	414
1.01019	1.02929	415
1.00495	1.04474	416
1.01005	1.02492	417
1.00557	1.04431	418
1.00601	1.03409	419
1.00902	1.0343	420
0.99285	1.02489	421
1.00847	1.03406	422
0.99879	1.03819	423
1.00939	1.03645	424
0.993326	1.03997	425
1.00099	1.03074	426
1.00818	1.03252	427
1.00631	1.03772	428
1.00125	1.04891	429
1.0022	1.03947	430
0.998497	1.03981	431
0.99274	1.03127	432
0.990759	1.03194	433
1.00829	1.03443	434
0.993913	1.03944	435
0.999193	1.04185	436
1.00942	1.0169	437
0.993546	1.03705	438
0.99857	1.02563	439
1.0055	1.03708	440
1.00484	1.02969	441
0.99582	1.03692	442
0.990613	1.04175	443
0.99824	1.03846	444
0.988816	1.03053	445
0.996736	1.02916	446
0.99406	1.03755	447
0.998093	1.03732	448
1.00818	1.03178	449
1.00374	1.02419	450
0.994243	1.02217	451
0.983426	1.03137	452
0.992006	1.02946	453
0.998533	1.039	454
0.999853	1.0217	455
0.99791	1.03094	456
1.00026	1.02765	457
0.996846	1.03181	458
0.998497	1.03258	459
1.00539	1.03544	460
0.983022	1.02993	461
1.00609	1.02728	462
0.99659	1.03456	463
0.989879	1.0354	464
1.00121	1.03722	465
1.00389	1.02912	466
0.998827	1.02953	467
0.994243	1.02704	468
0.995636	1.01824	469
0.986873	1.02929	470
1.00099	1.03285	471
0.9989	1.02462	472
0.989586	1.04162	473
0.982546	1.039	474
0.996296	1.02241	475
0.987863	1.03712	476
0.99791	1.01209	477
0.99802	1.03181	478
0.988523	1.03104	479
0.993913	1.03406	480
0.986799	1.02795	481
0.988559	1.02388	482
0.997433	1.02368	483
0.986542	1.02855	484
1.0004	1.02603	485
0.986542	1.02526	486
0.990356	1.02721	487
0.991823	1.03446	488
0.99538	1.03789	489
0.99868	1.0386	490
0.989403	1.02378	491
0.987239	1.02721	492
0.991419	1.02348	493
0.998203	1.02247	494
1.00191	1.02361	495
0.993656	1.01868	496
0.996333	1.02375	497
0.9945	1.01696	498
0.991273	1.02539	499
0.991676	1.02513	500
0.987826	1.03117	501
0.996113	1.02429	502
0.990759	1.0214	503
0.99857	1.02681	504
0.989696	1.0223	505
0.992226	1.02398	506
0.979685	1.01579	507
0.991933	1.01962	508
0.997213	1.01649	509
0.990466	1.03053	510
0.991383	1.02415	511
0.99219	1.02479	512
0.987679	1.0174	513
0.983279	1.0179	514
0.989329	1.02996	515
0.99362	1.00749	516
0.982692	1.03215	517
0.989843	1.01448	518
0.984929	1.01659	519
0.986616	1.018	520
0.987313	1.02593	521
0.988119	1.03208	522
0.986689	1.02204	523
0.982619	1.01831	524
0.985406	1.01737	525
0.999377	1.02214	526
0.988633	1.02183	527
0.998937	1.01985	528
0.988413	1.01055	529
0.982839	1.02392	530
0.986726	1.01908	531
0.99351	1.00171	532
0.971288	1.02308	533
0.988119	1.02969	534
0.99252	1.0168	535
0.990283	1.01041	536
0.985919	1.0168	537
0.984929	1.01666	538
0.992593	1.02079	539
0.995343	1.0083	540
0.981115	1.01569	541
0.985552	1.01827	542
0.973048	1.02264	543
0.978255	1.01767	544
0.980529	1.0171	545
0.986322	1.01653	546
0.99857	1.0173	547
0.987203	1.01633	548
0.981849	1.01377	549
0.974992	1.00564	550
0.984122	1.02734	551
1	1.01035	552

## Sheet: D
MosOpn3	PufTMT	LmPP	ZPP1	Time (s)
3.0651	4.14021	2.74568	2.83756	1
2.95598	4.00291	2.65648	2.74742	2
2.85595	3.88786	2.56828	2.67197	3
2.7638	3.77198	2.48099	2.57698	4
2.67507	3.65537	2.40734	2.50355	5
2.5872	3.54177	2.33018	2.43619	6
2.49858	3.43421	2.26822	2.36244	7
2.43023	3.33751	2.19821	2.30767	8
2.35644	3.23868	2.13484	2.24039	9
2.29881	3.15019	2.08276	2.18595	10
2.23707	3.05615	2.02277	2.13344	11
2.18083	2.9713	1.97361	2.08328	12
2.12731	2.89623	1.92092	2.03691	13
2.06893	2.81544	1.88289	1.9916	14
2.02409	2.74973	1.83529	1.94943	15
1.98123	2.68006	1.79726	1.91502	16
1.93385	2.60463	1.76084	1.88554	17
1.89742	2.54453	1.7205	1.84435	18
1.85919	2.49212	1.69239	1.81729	19
1.82375	2.43166	1.6602	1.77892	20
1.78784	2.38513	1.6322	1.7525	21
1.76096	2.33231	1.59951	1.72649	22
1.72719	2.27949	1.58072	1.7017	23
1.70009	2.22761	1.5513	1.67795	24
1.66916	2.18919	1.53191	1.65977	25
1.65392	2.14396	1.5096	1.637	26
1.62114	2.10637	1.48794	1.61147	27
1.60185	2.06764	1.46552	1.59063	28
1.5806	2.03608	1.44542	1.5773	29
1.56455	2.00094	1.43177	1.56026	30
1.54121	1.97172	1.41067	1.54225	31
1.52772	1.93761	1.39989	1.51906	32
1.5115	1.90455	1.37909	1.51212	33
1.49806	1.87518	1.3667	1.50969	34
1.47703	1.86124	1.35365	1.48457	35
1.46198	1.82355	1.34181	1.46971	36
1.44709	1.80374	1.33421	1.4605	37
1.43029	1.7779	1.31814	1.44588	38
1.42473	1.75014	1.3065	1.43861	39
1.41332	1.73158	1.29749	1.42779	40
1.40035	1.71708	1.28696	1.41656	41
1.38911	1.69706	1.27411	1.4109	42
1.3799	1.67403	1.26943	1.3979	43
1.36484	1.65927	1.2586	1.3899	44
1.35702	1.63904	1.24984	1.38183	45
1.35349	1.6222	1.24626	1.38441	46
1.33831	1.60676	1.23427	1.37221	47
1.33692	1.58679	1.22964	1.3605	48
1.32233	1.5805	1.22651	1.35186	49
1.31109	1.5686	1.21317	1.3496	50
1.30663	1.55555	1.2107	1.33821	51
1.30055	1.54141	1.20143	1.33215	52
1.29899	1.53174	1.19201	1.33029	53
1.29204	1.51573	1.1905	1.32674	54
1.28914	1.50938	1.1902	1.3168	55
1.27669	1.49488	1.18385	1.31244	56
1.27617	1.48786	1.18169	1.30832	57
1.26713	1.47866	1.17851	1.30582	58
1.26087	1.46462	1.16879	1.30186	59
1.26203	1.45812	1.17091	1.2891	60
1.25138	1.45173	1.16758	1.28708	61
1.25056	1.4431	1.15882	1.292	62
1.23968	1.4354	1.15635	1.28417	63
1.23881	1.42547	1.15096	1.27948	64
1.23985	1.41154	1.14698	1.27843	65
1.23273	1.40811	1.1422	1.27149	66
1.22867	1.4012	1.13741	1.26575	67
1.2234	1.39652	1.13822	1.26131	68
1.22085	1.38731	1.13942	1.26171	69
1.21587	1.38529	1.13388	1.25097	70
1.21564	1.37453	1.1286	1.25	71
1.21048	1.37172	1.12749	1.24742	72
1.20434	1.36319	1.12557	1.24152	73
1.19919	1.3543	1.1219	1.24216	74
1.19705	1.34905	1.1224	1.24128	75
1.19357	1.3465	1.11807	1.23998	76
1.19311	1.34104	1.11263	1.23893	77
1.18726	1.33579	1.11313	1.23473	78
1.18413	1.33153	1.11172	1.23401	79
1.18865	1.32732	1.10779	1.22811	80
1.1817	1.32155	1.10457	1.22763	81
1.18019	1.31827	1.1021	1.22649	82
1.17614	1.31276	1.10079	1.21898	83
1.17811	1.30985	1.09737	1.21696	84
1.17527	1.30133	1.09973	1.21325	85
1.16693	1.30387	1.09721	1.21123	86
1.16449	1.29488	1.09545	1.2084	87
1.16681	1.29056	1.08865	1.20436	88
1.15882	1.28329	1.08739	1.20137	89
1.1576	1.285	1.08875	1.20153	90
1.15563	1.28037	1.08613	1.19887	91
1.15662	1.27694	1.0812	1.19532	92
1.15303	1.27356	1.07933	1.20097	93
1.15453	1.26951	1.07989	1.20048	94
1.1514	1.26623	1.07697	1.18756	95
1.14845	1.26722	1.07485	1.19426	96
1.15181	1.26363	1.07404	1.18651	97
1.14469	1.25667	1.07042	1.1891	98
1.14081	1.24903	1.07178	1.1857	99
1.14086	1.24736	1.0687	1.18021	100
1.13733	1.24123	1.07006	1.18126	101
1.13797	1.24237	1.06891	1.18118	102
1.13559	1.23712	1.06568	1.17181	103
1.12957	1.2367	1.0679	1.17326	104
1.13165	1.23447	1.06397	1.17254	105
1.12743	1.2339	1.0614	1.16817	106
1.12673	1.23083	1.06427	1.16179	107
1.12748	1.22885	1.05989	1.16866	108
1.1232	1.22563	1.06246	1.1685	109
1.12042	1.2222	1.05647	1.16785	110
1.12019	1.22095	1.05662	1.16018	111
1.1199	1.21757	1.05898	1.16317	112
1.1192	1.21326	1.05254	1.16357	113
1.12088	1.21362	1.05571	1.15606	114
1.11439	1.20806	1.05289	1.15501	115
1.1104	1.20457	1.05385	1.15129	116
1.10715	1.20546	1.0543	1.15792	117
1.10762	1.20036	1.05168	1.15582	118
1.1075	1.20192	1.05188	1.15509	119
1.11161	1.19927	1.04755	1.14871	120
1.10611	1.19646	1.04916	1.14071	121
1.10426	1.18913	1.04664	1.14136	122
1.10298	1.19272	1.04629	1.13942	123
1.0991	1.18789	1.04851	1.1374	124
1.09991	1.18617	1.04574	1.14144	125
1.10096	1.18139	1.04261	1.13603	126
1.10287	1.18368	1.04292	1.1336	127
1.10252	1.18019	1.04287	1.1374	128
1.09036	1.18227	1.03873	1.13021	129
1.09094	1.1751	1.04332	1.13368	130
1.09702	1.17156	1.03697	1.13425	131
1.08711	1.17089	1.03657	1.13449	132
1.09412	1.16953	1.03848	1.12746	133
1.09076	1.17109	1.03531	1.12593	134
1.08983	1.16413	1.03491	1.12456	135
1.08514	1.16444	1.03637	1.129	136
1.08908	1.16002	1.03566	1.12197	137
1.08404	1.16142	1.03642	1.12496	138
1.08468	1.16054	1.03289	1.12229	139
1.08202	1.15862	1.0337	1.11866	140
1.07802	1.15435	1.03521	1.12092	141
1.07929	1.15529	1.02896	1.11454	142
1.08074	1.15285	1.03254	1.11882	143
1.07663	1.15118	1.03481	1.1189	144
1.07981	1.15009	1.03309	1.11317	145
1.07101	1.15149	1.02498	1.11018	146
1.07315	1.14843	1.02791	1.1143	147
1.07877	1.14858	1.03083	1.10856	148
1.07263	1.14125	1.0276	1.11155	149
1.0702	1.13756	1.02952	1.113	150
1.0658	1.1425	1.02579	1.11123	151
1.0636	1.13834	1.02428	1.1084	152
1.07368	1.13741	1.02927	1.11147	153
1.06516	1.13455	1.02614	1.11244	154
1.06377	1.1372	1.02534	1.10767	155
1.0651	1.13444	1.021	1.0975	156
1.06557	1.12576	1.02443	1.09758	157
1.06661	1.12644	1.0275	1.10242	158
1.06394	1.12202	1.02327	1.10186	159
1.05902	1.12659	1.02569	1.09709	160
1.06273	1.12623	1.02196	1.10525	161
1.05815	1.123	1.0206	1.09653	162
1.05439	1.12145	1.0203	1.09806	163
1.05665	1.12264	1.02146	1.09523	164
1.05798	1.12285	1.01803	1.09661	165
1.05502	1.11406	1.01788	1.09216	166
1.05636	1.11822	1.01969	1.09216	167
1.05485	1.11074	1.02025	1.09095	168
1.05676	1.11146	1.01914	1.09063	169
1.05138	1.11131	1.01476	1.09006	170
1.05022	1.11339	1.01405	1.09015	171
1.05016	1.11079	1.01718	1.08312	172
1.0486	1.10704	1.01259	1.07892	173
1.05277	1.1032	1.01214	1.08239	174
1.04999	1.10626	1.01627	1.08465	175
1.04553	1.10689	1.0137	1.0811	176
1.04327	1.10247	1.01476	1.07989	177
1.04726	1.10023	1.01063	1.07924	178
1.04663	1.10127	1.01224	1.08126	179
1.04385	1.09623	1.01254	1.07981	180
1.04304	1.09951	1.01385	1.07157	181
1.04234	1.09129	1.013	1.08166	182
1.04164	1.0954	1.00615	1.07553	183
1.04147	1.09088	1.00856	1.07318	184
1.04286	1.09259	1.01012	1.07625	185
1.03817	1.09353	1.01123	1.0689	186
1.04304	1.08828	1.01224	1.07044	187
1.04153	1.08464	1.00771	1.06397	188
1.03556	1.08297	1.00861	1.06187	189
1.03678	1.08604	1.00479	1.06365	190
1.03956	1.0837	1.00448	1.05889	191
1.03701	1.08069	1.00524	1.058	192
1.03759	1.08266	1.00126	1.05864	193
1.03406	1.07949	1.00705	1.05889	194
1.03469	1.07835	1.00348	1.05654	195
1.03551	1.07767	1.00186	1.05533	196
1.03892	1.07736	1.00212	1.05057	197
1.03151	1.06951	1.00353	1.05258	198
1.03278	1.07268	1.00257	1.04701	199
1.03238	1.07018	1.00045	1.05355	200
1.02803	1.0733	0.99995	1.04822	201
1.02989	1.0679	0.997633	1.05153	202
1.02247	1.06935	1.0002	1.0517	203
1.02369	1.0654	0.99597	1.04685	204
1.02467	1.06701	0.997381	1.05452	205
1.02937	1.06644	1.00121	1.04402	206
1.02438	1.06244	1.00055	1.04919	207
1.02415	1.06478	0.998237	1.04798	208
1.02467	1.06192	0.997935	1.04402	209
1.02774	1.06088	0.990984	1.04184	210
1.02525	1.06192	0.994862	1.04548	211
1.0161	1.05199	0.996121	1.04548	212
1.01842	1.05589	0.994207	1.03982	213
1.0234	1.05807	0.993553	1.0353	214
1.01616	1.05849	0.997633	1.03756	215
1.0168	1.05526	0.992344	1.03538	216
1.02068	1.05038	0.986803	1.04055	217
1.01743	1.05214	0.990027	1.03748	218
1.02143	1.04955	0.991437	1.03643	219
1.01894	1.05022	0.991185	1.03263	220
1.01628	1.05225	0.989825	1.02989	221
1.01975	1.04601	0.987407	1.03393	222
1.01848	1.04955	0.99179	1.03368	223
1.01848	1.04507	0.991588	1.03005	224
1.01263	1.04341	0.994056	1.02439	225
1.01251	1.04195	0.986602	1.03013	226
1.01599	1.04539	0.991941	1.02948	227
1.00799	1.0393	0.991336	1.03045	228
1.01842	1.04351	0.988717	1.03425	229
1.01095	1.04232	0.990329	1.02698	230
1.01321	1.0418	0.992243	1.02141	231
1.01489	1.03546	0.990933	1.02835	232
1.01106	1.038	0.989976	1.02044	233
1.00979	1.038	0.987962	1.0252	234
1.00759	1.03509	0.99043	1.02262	235
1.00701	1.03941	0.987206	1.02981	236
1.00805	1.03499	0.989926	1.01963	237
1.00944	1.0341	0.991487	1.02108	238
1.01425	1.03384	0.98635	1.02464	239
1.00822	1.03447	0.986702	1.02561	240
1.01222	1.03166	0.986652	1.01777	241
1.00683	1.02449	0.98509	1.01842	242
1.01043	1.02984	0.987659	1.02213	243
1.0055	1.03067	0.990631	1.02052	244
1.00672	1.02989	0.983076	1.01721	245
1.01147	1.02911	0.987004	1.01648	246
1.00915	1.02818	0.987105	1.01931	247
1.0077	1.02828	0.986954	1.01599	248
1.00666	1.02282	0.986652	1.02359	249
1.01309	1.02885	0.990782	1.01624	250
1.00348	1.02397	0.98781	1.01607	251
1.00382	1.0235	0.988213	1.01624	252
1.00544	1.02204	0.989523	1.01511	253
1.00324	1.02485	0.985745	1.01583	254
1.00579	1.02038	0.987105	1.01858	255
1.00243	1.0261	0.988717	1.01357	256
1.00463	1.02147	0.988616	1.01721	257
1.00232	1.01913	0.991286	1.01268	258
1.00382	1.01788	0.98373	1.01139	259
1.00284	1.01664	0.996172	1.01389	260
1.00162	1.02017	0.986702	1.00872	261
0.999595	1.01684	0.99043	1.01349	262
1.00012	1.02152	0.988113	1.00937	263
1.00463	1.01794	0.989573	1.01236	264
1.0022	1.01087	0.994711	1.00945	265
1.00481	1.02059	0.991236	1.01284	266
1.00052	1.01554	0.994812	1.01018	267
0.995946	1.01398	0.991387	1.01131	268
1.0018	1.01674	0.9932	1.00929	269
1.00307	1.01768	0.991739	1.00961	270
1.00666	1.01217	0.994913	1.01074	271
1.00365	1.0184	0.99587	1.00719	272
1.00081	1.01606	0.991387	1.01107	273
1.00203	1.01409	0.992999	1.00614	274
1.00133	1.01274	0.994862	1.00646	275
0.997451	1.01362	0.992092	1.0063	276
0.999652	1.01461	0.992797	1.00533	277
1.00185	1.01279	0.992898	1.00759	278
0.999826	1.01029	0.993553	1.00622	279
0.999131	1.00697	0.993603	1.01026	280
0.996235	1.01107	0.995719	1.00048	281
0.999768	1.01222	0.997179	1.00363	282
1.00272	1.01523	0.998187	1.00929	283
0.999363	1.00941	0.995064	1.0038	284
1.00075	1.00842	0.992495	1.00493	285
0.996756	1.00723	0.999647	1.00775	286
1.00301	1.00827	0.996978	1.00711	287
1.00191	1.00795	0.992596	1.00509	288
0.998089	1.01035	0.996776	1.00606	289
1.00017	1.00967	0.989422	1.0046	290
1.00081	1.01263	1.0001	1.00202	291
0.99386	1.00556	0.997582	1.0038	292
1.00035	1.00863	0.993754	1.00525	293
0.998957	1.00712	0.997431	1.00121	294
0.997104	1.00697	0.992797	1	295
0.99693	1.00728	0.99995	1.00598	296
0.997046	1.0027	0.998942	1.00073	297
0.999595	1.004	0.998187	1.0004	298
0.996003	1.00447	0.99869	1.00275	299
0.995946	1.00166	0.99864	1.00121	300
0.995308	1.00213	1.00358	0.997738	301
1	0.997401	0.993301	1.0025	302
	1.00546	0.99864	0.999192	303
	1	0.997431	0.997173	304
0.982045		0.996726	1.00089	305
0.956849		0.997079	1.00258	306
0.936229	0.993865	0.99456	1.00194	307
0.914625	0.964336	0.99723	0.99895	308
0.897249	0.937302	1	1.00468	309
0.880626	0.911983		0.998788	310
0.860701	0.889576		0.994669	311
0.850738	0.864934	1.05737	0.994669	312
0.834347	0.846998	0.997733	1.00186	313
0.825485	0.830933	0.971893	0.994911	314
0.817434	0.816428	0.943585	0.998788	315
0.807066	0.803639	0.921977	0.997819	316
0.796699	0.790018	0.902282	0.998304	317
0.794903	0.777697	0.89392	0.996042	318
0.786331	0.762048	0.877197	0.996931	319
0.780597	0.75659	0.863648	1.00081	320
0.77799	0.747855	0.85584	0.995153	321
0.769881	0.738446	0.847177	0.998142	322
0.772951	0.73413	0.838715	0.996365	323
0.769012	0.728204	0.831864	0.999596	324
0.764726	0.724409	0.819121	0.998223	325
0.765537	0.71921	0.820481	0.996123	326
0.761193	0.713283	0.814084	0.995315	327
0.757197	0.707564	0.80683	0.995315	328
0.757197	0.707668	0.802146	0.996769	329
0.754706	0.701326	0.80134	0.994992	330
0.757081	0.696751	0.800584	0.999677	331
0.757776	0.696179	0.794389	1	332
0.758297	0.693683	0.789452		333
0.759745	0.691292	0.788294		334
0.758992	0.686821	0.785624	1.02431	335
0.761309	0.688848	0.78633	0.981422	336
0.762004	0.688069	0.782602	0.960097	337
0.760209	0.686145	0.787035	0.947415	338
0.762525	0.683338	0.781746	0.92496	339
0.766638	0.679231	0.779882	0.918255	340
0.768375	0.682818	0.779479	0.913005	341
0.768955	0.680686	0.780235	0.904523	342
0.770634	0.678919	0.780335	0.898546	343
0.773299	0.68131	0.778975	0.894103	344
0.773414	0.681258	0.777061	0.888934	345
0.773762	0.679439	0.776356	0.887237	346
0.776542	0.676943	0.779681	0.880291	347
0.780655	0.677983	0.774291	0.882068	348
0.779149	0.676111	0.773838	0.875525	349
0.782334	0.678659	0.773183	0.875929	350
0.786273	0.677099	0.77414	0.873748	351
0.786968	0.679179	0.77545	0.873102	352
0.785578	0.679958	0.774744	0.866074	353
0.791428	0.674812	0.778925	0.869063	354
0.79276	0.678087	0.776255	0.864459	355
0.799073	0.678711	0.776558	0.860662	356
0.798784	0.677567	0.77827	0.861147	357
0.798494	0.679075	0.77691	0.860985	358
0.795077	0.681674	0.774845	0.85832	359
0.801622	0.678763	0.778623	0.864216	360
0.8011	0.678815	0.774392	0.857189	361
0.807008	0.678607	0.777968	0.86147	362
0.810426	0.678971	0.779429	0.856866	363
0.81002	0.68157	0.782501	0.860501	364
0.815581	0.681518	0.778774	0.854604	365
0.815175	0.679439	0.774744	0.854281	366
0.813611	0.68131	0.781544	0.852666	367
0.819693	0.680114	0.78089	0.858481	368
0.820909	0.680686	0.784415	0.851373	369
0.820041	0.68053	0.780537	0.857754	370
0.820562	0.679646	0.78225	0.851696	371
0.824674	0.685157	0.784818	0.853554	372
0.825485	0.684533	0.782652	0.852342	373
0.827802	0.681258	0.785826	0.847738	374
0.827049	0.684689	0.784113	0.849515	375
0.825717	0.680634	0.780184	0.848384	376
0.826296	0.687705	0.786732	0.85	377
0.830466	0.685885	0.785221	0.853473	378
0.834926	0.686977	0.783559	0.854766	379
0.836027	0.685573	0.787538	0.848869	380
0.839907	0.688485	0.786682	0.852666	381
0.837648	0.687549	0.786732	0.852181	382
0.841124	0.688225	0.783962	0.846688	383
0.836895	0.691084	0.789654	0.850404	384
0.838749	0.692332	0.792021	0.848465	385
0.840139	0.688381	0.787085	0.854281	386
0.843614	0.689992	0.790561	0.850162	387
0.843383	0.691864	0.791064	0.854281	388
0.843904	0.695139	0.790762	0.844588	389
0.847147	0.692852	0.792475	0.853796	390
0.847147	0.695555	0.792475	0.852423	391
0.851549	0.694931	0.789906	0.851616	392
0.848016	0.702521	0.793935	0.8437	393
0.848248	0.694827	0.789604	0.847738	394
0.850391	0.695867	0.800282	0.8521	395
0.853403	0.694515	0.794187	0.848223	396
0.855836	0.698882	0.793835	0.84588	397
0.855951	0.697167	0.796252	0.852827	398
0.851897	0.703197	0.795295	0.851858	399
0.855604	0.702781	0.794439	0.844588	400
0.853924	0.704913	0.801491	0.850242	401
0.855836	0.697946	0.79867	0.850889	402
0.854967	0.701326	0.800987	0.849515	403
0.858384	0.702521	0.79595	0.850646	404
0.858963	0.704081	0.8027	0.850646	405
0.85989	0.705849	0.799778	0.848869	406
0.856531	0.705277	0.807183	0.849031	407
0.857515	0.705225	0.802297	0.846204	408
0.863713	0.705485	0.803002	0.848465	409
0.864871	0.710684	0.801894	0.850242	410
0.863539	0.706733	0.800383	0.850323	411
0.864697	0.709488	0.80275	0.848546	412
0.861222	0.711827	0.805823	0.849758	413
0.862381	0.713439	0.806075	0.850889	414
0.86406	0.714323	0.806881	0.852989	415
0.864466	0.713751	0.804312	0.849435	416
0.86128	0.711671	0.80819	0.850485	417
0.863944	0.714063	0.805521	0.852746	418
0.865682	0.720613	0.80955	0.85	419
0.86128	0.715155	0.810961	0.851292	420
0.864292	0.717026	0.811263	0.852019	421
0.864176	0.717962	0.810809	0.8542	422
0.866319	0.717442	0.813227	0.854281	423
0.867825	0.722017	0.815494	0.852908	424
0.8702	0.721653	0.81358	0.857512	425
0.867072	0.724721	0.812824	0.854039	426
0.869505	0.719262	0.820732	0.852019	427
0.866667	0.723681	0.816501	0.85517	428
0.866725	0.722069	0.815998	0.858481	429
0.871416	0.723681	0.820178	0.858724	430
0.866609	0.72732	0.817257	0.85727	431
0.869563	0.729452	0.818718	0.853393	432
0.870432	0.730699	0.820934	0.856139	433
0.867014	0.730803	0.824158	0.855735	434
0.873791	0.730803	0.820632	0.856785	435
0.868983	0.731947	0.827432	0.858885	436
0.8713	0.732103	0.823956	0.85832	437
0.869273	0.735638	0.823805	0.859855	438
0.868288	0.73465	0.825669	0.861228	439
0.868983	0.739277	0.824913	0.856543	440
0.869621	0.735742	0.826374	0.863732	441
0.868694	0.738965	0.826323	0.859935	442
0.867535	0.740525	0.826575	0.855816	443
0.870663	0.741721	0.828389	0.863409	444
0.873617	0.742345	0.829547	0.862439	445
0.868868	0.743125	0.828842	0.864378	446
0.870432	0.740733	0.829346	0.860743	447
0.874196	0.744632	0.833879	0.859289	448
0.872285	0.748531	0.83262	0.862278	449
0.872285	0.74536	0.833577	0.860662	450
0.873154	0.749831	0.834282	0.862601	451
0.866725	0.753054	0.835189	0.860339	452
0.870721	0.75477	0.835038	0.869225	453
0.875297	0.747855	0.832922	0.860662	454
0.87327	0.751807	0.838614	0.864378	455
0.872169	0.75477	0.837355	0.868336	456
0.870084	0.756018	0.838563	0.866882	457
0.877266	0.753522	0.840931	0.864863	458
0.869852	0.757057	0.841384	0.86559	459
0.872864	0.759761	0.837455	0.868982	460
0.873212	0.76158	0.8435	0.868255	461
0.873907	0.765896	0.841032	0.871082	462
0.87576	0.761996	0.843903	0.868821	463
0.871995	0.764128	0.844054	0.870517	464
0.87298	0.770055	0.84763	0.870759	465
0.874312	0.77203	0.848285	0.867044	466
0.871706	0.770782	0.846975	0.871567	467
0.873907	0.767923	0.846371	0.866963	468
0.879062	0.771458	0.85176	0.874233	469
0.876397	0.770263	0.849494	0.874071	470
0.870026	0.775669	0.849997	0.874556	471
0.874023	0.779257	0.849393	0.871567	472
0.869794	0.782376	0.850552	0.874717	473
0.878193	0.78014	0.849141	0.875121	474
0.877324	0.782636	0.85035	0.876252	475
0.879873	0.782012	0.854934	0.881745	476
0.871358	0.782948	0.854934	0.87609	477
0.878367	0.784351	0.856445	0.87706	478
0.876166	0.781336	0.854934	0.874717	479
0.879409	0.783728	0.8572	0.87916	480
0.881263	0.787939	0.857251	0.880695	481
0.879293	0.788407	0.855488	0.877868	482
0.87993	0.789914	0.857251	0.885703	483
0.879641	0.795997	0.859215	0.876333	484
0.880278	0.796101	0.858863	0.878433	485
0.881494	0.795061	0.858812	0.881664	486
0.87883	0.793501	0.856999	0.882876	487
0.876108	0.798804	0.860424	0.880048	488
0.873791	0.80052	0.863396	0.885057	489
0.879873	0.799376	0.861784	0.887076	490
0.878135	0.799168	0.864051	0.883845	491
0.880046	0.801404	0.864554	0.881583	492
0.878598	0.804107	0.862943	0.883118	493
0.876861	0.804679	0.862338	0.883845	494
0.877208	0.808058	0.861734	0.882714	495
0.881436	0.806811	0.861129	0.87811	496
0.87744	0.810502	0.86128	0.887318	497
0.88439	0.813985	0.863799	0.890792	498
0.876629	0.810138	0.86803	0.886591	499
0.88051	0.811489	0.865814	0.887722	500
0.880857	0.810866	0.86934	0.887157	501
0.886244	0.81726	0.867023	0.887803	502
0.882305	0.816844	0.86672	0.887318	503
0.882479	0.816272	0.867526	0.889176	504
0.878598	0.824019	0.867929	0.887884	505
0.881379	0.821939	0.86672	0.892649	506
0.880394	0.822147	0.870095	0.893215	507
0.884622	0.827762	0.867073	0.894184	508
0.879583	0.829478	0.865209	0.88748	509
0.882711	0.825942	0.868786	0.887561	510
0.880915	0.828282	0.868282	0.889984	511
0.882884	0.830361	0.872362	0.894184	512
0.882421	0.826722	0.870498	0.891438	513
0.88636	0.830829	0.870951	0.892407	514
0.881031	0.834001	0.87483	0.896123	515
0.885085	0.834832	0.872563	0.889742	516
0.882479	0.83686	0.8707	0.897011	517
0.886997	0.839199	0.871405	0.892649	518
0.884159	0.840187	0.869591	0.896042	519
0.884796	0.84367	0.872916	0.894346	520
		0.876794	0.897092	521
		0.873974	0.898708	522
		0.871052	0.897334	523
		0.877349	0.895719	524
		0.877097	0.893538	525
		0.877701	0.903069	526
		0.871757	0.895315	527
		0.877046	0.896527	528
		0.875082	0.896688	529
		0.874377	0.895234	530
		0.875686	0.899596	531
		0.877349	0.898142	532
		0.873873	0.898465	533
		0.874377	0.896931	534
		0.876089	0.903473	535
		0.878356	0.899758	536
		0.88022	0.89483	537
		0.878406	0.90105	538
		0.878406	0.902342	539
		0.875082	0.902746	540
			0.911147	541
			0.905412	542
		0.90475	0.904847	543
		0.937491	0.90937	544
		0.986551	0.907351	545
		1.04836	0.911793	546
		1.11207	0.906462	547
		1.17242	0.903231	548
		1.22576	0.908078	549
		1.27673	0.90937	550
		1.31638	0.909289	551
		1.35209	0.904685	552
		1.37692	0.906866	553
		1.41011	0.908885	554
		1.41963	0.906381	555
		1.43238	0.910743	556
		1.44532	0.915509	557
		1.44784	0.909289	558
		1.45409	0.909128	559
		1.45152	0.911955	560
		1.46129	0.90412	561
		1.45812	0.91252	562
		1.45434	0.91147	563
		1.44759		564
		1.44895		565
		1.43852	0.951858	566
		1.43888	1.01502	567
		1.43152	1.09079	568
		1.42125	1.179	569
		1.41974	1.25574	570
		1.41465	1.33344	571
		1.40951	1.39532	572
		1.40271	1.44847	573
		1.40059	1.48861	574
		1.39163	1.53166	575
		1.38302	1.55945	576
		1.37339	1.58489	577
		1.37067	1.58926	578
		1.36418	1.60727	579
		1.36523	1.61591	580
		1.35476	1.61737	581
		1.34942	1.62924	582
		1.34755	1.62763	583
		1.33693	1.62124	584
		1.33355	1.62561	585
		1.33038	1.61801	586
		1.32539	1.61349	587
		1.32448	1.6021	588
		1.31386	1.59612	589
		1.30731	1.59031	590
		1.3067	1.58288	591
		1.30308	1.57859	592
		1.30172	1.56793	593
		1.29028	1.55654	594
		1.29577	1.54766	595
		1.29205	1.54297	596
		1.2855	1.5357	597
		1.28369	1.51987	598
		1.28222	1.51906	599
		1.28283	1.50396	600
		1.2721	1.49887	601
		1.27568	1.49491	602
		1.26857	1.48344	603
		1.26958	1.47859	604
		1.26379	1.47229	605
		1.25699	1.45711	606
		1.25623	1.4567	607
		1.25684	1.44717	608
		1.2587	1.43659	609
		1.2512	1.43813	610
		1.2523	1.43183	611
		1.25004	1.42536	612
		1.24651	1.42181	613
		1.24596	1.41422	614
		1.24435	1.39661	615
		1.24107	1.40711	616
		1.24062	1.39871	617
		1.23709	1.3895	618
		1.23649	1.38263	619
		1.23125	1.38045	620
		1.23583	1.37439	621
		1.2315	1.37763	622
		1.23432	1.36834	623
		1.22989	1.35646	624
		1.23039	1.36002	625
		1.2312	1.35509	626
		1.22944	1.34717	627
		1.22314	1.34216	628
		1.22445	1.34265	629
		1.22198	1.33595	630
		1.22561	1.32439	631
		1.21997	1.33279	632
		1.22188	1.32528	633
		1.22249	1.33691	634
		1.22158	1.32359	635
		1.21417	1.32181	636
		1.21584	1.31438	637
		1.21367	1.31236	638
		1.21604	1.30614	639
		1.2174	1.30751	640
		1.21397	1.29911	641
		1.21397	1.30436	642
		1.21508	1.29847	643
		1.21644	1.29168	644
		1.21725	1.29588	645
		1.21211	1.29305	646
		1.2103	1.29459	647
		1.2113	1.28748	648
		1.2105	1.28926	649
		1.20848	1.28174	650
		1.21065	1.27536	651
		1.20904	1.27399	652
		1.20617	1.27488	653
		1.20939	1.27698	654
		1.20742	1.26987	655
		1.2035	1.27132	656
		1.19967	1.26712	657
		1.2045	1.26187	658
		1.20496	1.26244	659
		1.20244	1.25703	660
		1.20224	1.25994	661
		1.19529	1.26034	662
		1.20133	1.25751	663
		1.20062	1.2475	664
		1.20123	1.25234	665
		1.19916	1.24725	666
		1.19785	1.24305	667
		1.20395	1.24556	668
		1.19947	1.24184	669
		1.20183	1.24216	670
		1.20007	1.2374	671
		1.197	1.23506	672
		1.19675	1.23982	673
		1.20148	1.23029	674
		1.19942	1.23288	675
		1.19982	1.23037	676
		1.19856	1.23174	677
		1.19695	1.23409	678
		1.19403	1.23183	679
		1.19513	1.22811	680
		1.19755	1.22027	681
		1.19236	1.22415	682
		1.19967	1.22851	683
		1.19866	1.22649	684
		1.19649	1.21664	685
		1.19619	1.22027	686
		1.19413	1.21042	687
		1.19916	1.21785	688
		1.19262	1.22165	689
		1.19911	1.21559	690
		1.19513	1.21131	691
		1.19841	1.21276	692
		1.19463	1.21034	693
		1.19831	1.20864	694
		1.1977	1.21236	695
		1.20042	1.2067	696
		1.20259	1.20291	697
		1.19302	1.20582	698
		1.20304	1.20485	699
		1.19841	1.19717	700
		1.19765	1.19952	701
		1.2035	1.20808	702
		1.20501	1.20363	703
		1.20632	1.1975	704
		1.20269	1.19927	705
		1.20158	1.19507	706
		1.20501	1.19943	707
		1.20843	1.19063	708
		1.20606	1.19289	709
		1.2105	1.19305	710
		1.20878	1.19685	711
		1.21332	1.19289	712
		1.21276	1.19661	713
		1.21397	1.18336	714
		1.21433	1.1916	715
		1.21155	1.18764	716
		1.2107	1.18643	717
		1.21694	1.19047	718
		1.21241	1.18942	719
		1.22052	1.1899	720
		1.2173	1.18603	721
		1.21881	1.19023	722
		1.21982	1.18901	723
		1.22173	1.18425	724
			1.18134	725
			1.18724	726
			1.19362	727
			1.18393	728
			1.18449	729
			1.18449	730
			1.18078	731
			1.1794	732
			1.18481	733
			1.18376	734
			1.18732	735
			1.17851	736
			1.18328	737
			1.1853	738
			1.187	739
			1.18489	740
			1.18183	741
			1.18675	742
			1.18708	743
			1.18401	744
			1.18344	745
			1.18312	746
			1.18271	747
			1.18651	748
			1.1912	749
			1.18498	750
			1.18514	751
			1.18021	752
			1.1878	753
			1.18764	754

## Sheet: E
control	YM254890	Time (s)
1.06835	1.0956	1
1.06835	1.10045	2
1.08071	1.10283	3
1.07887	1.09207	4
1.06927	1.09239	5
1.06828	1.111	6
1.07836	1.09467	7
1.06512	1.08469	8
1.06589	1.0951	9
1.0755	1.1038	10
1.08625	1.08441	11
1.08218	1.10023	12
1.07374	1.08608	13
1.07059	1.08006	14
1.06776	1.09385	15
1.06135	1.08961	16
1.06274	1.09506	17
1.07587	1.09253	18
1.0678	1.08658	19
1.06047	1.08772	20
1.06571	1.09407	21
1.07477	1.08854	22
1.07631	1.08761	23
1.06065	1.09132	24
1.0685	1.08811	25
1.05442	1.10939	26
1.07711	1.08979	27
1.06501	1.09218	28
1.08104	1.09321	29
1.05904	1.08605	30
1.06736	1.08277	31
1.07491	1.09214	32
1.07664	1.08868	33
1.06776	1.08565	34
1.07286	1.09617	35
1.06644	1.10508	36
1.07708	1.0885	37
1.05614	1.08733	38
1.07084	1.09574	39
1.06014	1.10611	40
1.05757	1.08487	41
1.0663	1.09421	42
1.07136	1.09328	43
1.06149	1.08398	44
1.07051	1.08056	45
1.06784	1.08608	46
1.0645	1.10034	47
1.08042	1.08487	48
1.05867	1.08744	49
1.05416	1.09467	50
1.05486	1.08587	51
1.06956	1.07521	52
1.06494	1.09895	53
1.07788	1.09649	54
1.06839	1.07685	55
1.05401	1.07104	56
1.06721	1.0972	57
1.06274	1.08562	58
1.05625	1.0854	59
1.06516	1.08505	60
1.05654	1.09838	61
1.05746	1.08006	62
1.04525	1.08822	63
1.05398	1.08376	64
1.0689	1.07885	65
1.05365	1.0885	66
1.05651	1.08223	67
1.05742	1.09321	68
1.06032	1.06976	69
1.06707	1.08929	70
1.05885	1.09161	71
1.05992	1.08658	72
1.06498	1.07599	73
1.06487	1.09268	74
1.06281	1.08248	75
1.05383	1.09011	76
1.05816	1.0879	77
1.05471	1.08059	78
1.05244	1.07895	79
1.04899	1.0787	80
1.06215	1.09253	81
1.05211	1.09054	82
1.05948	1.08216	83
1.05409	1.08498	84
1.0586	1.08523	85
1.06908	1.0782	86
1.0561	1.07011	87
1.05739	1.07596	88
1.0586	1.08262	89
1.06556	1.07674	90
1.06336	1.07425	91
1.06219	1.07104	92
1.0594	1.07931	93
1.05592	1.07043	94
1.06615	1.07222	95
1.05442	1.08597	96
1.05904	1.08462	97
1.06347	1.06797	98
1.06105	1.07521	99
1.05863	1.07899	100
1.04763	1.08212	101
1.05574	1.07286	102
1.0506	1.08337	103
1.06846	1.075	104
1.04991	1.08662	105
1.0564	1.07189	106
1.06333	1.08826	107
1.05753	1.08387	108
1.0572	1.07778	109
1.05442	1.08348	110
1.05519	1.06045	111
1.05676	1.06961	112
1.05438	1.07214	113
1.06391	1.07728	114
1.05394	1.071	115
1.05607	1.07382	116
1.05563	1.06819	117
1.06032	1.075	118
1.06421	1.06901	119
1.05878	1.07892	120
1.05574	1.07307	121
1.05599	1.07995	122
1.05801	1.08508	123
1.0528	1.06751	124
1.05475	1.08041	125
1.05042	1.07353	126
1.06347	1.07835	127
1.05951	1.08305	128
1.04987	1.0529	129
1.05035	1.09018	130
1.05955	1.07072	131
1.03913	1.07489	132
1.03975	1.07314	133
1.0498	1.07154	134
1.05013	1.07745	135
1.05735	1.07093	136
1.06608	1.07097	137
1.04914	1.06858	138
1.06168	1.06035	139
1.05093	1.0663	140
1.04202	1.06961	141
1.04793	1.07877	142
1.05258	1.06922	143
1.05504	1.07934	144
1.04998	1.07453	145
1.03821	1.06338	146
1.05251	1.07532	147
1.05097	1.07489	148
1.04411	1.07756	149
1.05882	1.05853	150
1.04213	1.07831	151
1.0451	1.07599	152
1.04672	1.06979	153
1.05464	1.06327	154
1.04547	1.06869	155
1.04921	1.06434	156
1.0535	1.07414	157
1.05383	1.05917	158
1.04492	1.07293	159
1.04283	1.07261	160
1.04789	1.071	161
1.04529	1.07339	162
1.04459	1.06833	163
1.04228	1.06972	164
1.06153	1.06886	165
1.03539	1.07735	166
1.04455	1.0679	167
1.04972	1.06605	168
1.04672	1.07735	169
1.03898	1.07428	170
1.03572	1.07164	171
1.04052	1.05874	172
1.05299	1.05824	173
1.04455	1.0591	174
1.04833	1.06341	175
1.05361	1.06063	176
1.03113	1.06972	177
1.04367	1.06936	178
1.03513	1.0581	179
1.05533	1.06947	180
1.04078	1.06423	181
1.0403	1.05108	182
1.04756	1.06958	183
1.04041	1.06156	184
1.04092	1.05151	185
1.03975	1.0674	186
1.04521	1.057	187
1.03909	1.06979	188
1.03803	1.06787	189
1.03451	1.05931	190
1.04309	1.06441	191
1.04217	1.06199	192
1.0407	1.06213	193
1.05515	1.05511	194
1.02699	1.07086	195
1.0498	1.0555	196
1.0432	1.0648	197
1.03245	1.06152	198
1.02996	1.05696	199
1.04719	1.0524	200
1.03909	1.06252	201
1.03898	1.06277	202
1.04265	1.04919	203
1.03458	1.05724	204
1.02937	1.05243	205
1.04411	1.06594	206
1.0429	1.05553	207
1.03106	1.05885	208
1.04221	1.05215	209
1.04411	1.05564	210
1.04243	1.05254	211
1.04807	1.06077	212
1.03513	1.05817	213
1.03788	1.05942	214
1.03476	1.04637	215
1.02185	1.05254	216
1.04899	1.06812	217
1.02681	1.06245	218
1.03469	1.05133	219
1.03916	1.06067	220
1.03154	1.05315	221
1.03421	1.05304	222
1.04243	1.04598	223
1.03165	1.05967	224
1.04364	1.06195	225
1.03183	1.05992	226
1.03781	1.06234	227
1.02978	1.05682	228
1.02996	1.05999	229
1.02424	1.05789	230
1.0377	1.06013	231
1.03663	1.05824	232
1.04492	1.05411	233
1.03649	1.04769	234
1.03484	1.05397	235
1.03652	1.04805	236
1.03623	1.05133	237
1.03297	1.0525	238
1.03528	1.04766	239
1.0304	1.05215	240
1.04045	1.04833	241
1.03858	1.05539	242
1.04338	1.04783	243
1.03957	1.04491	244
1.03597	1.04905	245
1.03425	1.05728	246
1.04059	1.0447	247
1.02123	1.05682	248
1.02086	1.04591	249
1.02688	1.05076	250
1.03949	1.04541	251
1.02831	1.05179	252
1.0304	1.0427	253
1.03924	1.05268	254
1.0169	1.0499	255
1.02824	1.05532	256
1.03216	1.04794	257
1.03616	1.04017	258
1.02963	1.0493	259
1.03234	1.0437	260
1.03531	1.04769	261
1.04276	1.03946	262
1.02662	1.0468	263
1.03113	1.05746	264
1.02259	1.04431	265
1.02835	1.05208	266
1.02908	1.05336	267
1.0352	1.05133	268
1.02383	1.05386	269
1.02306	1.04666	270
1.03997	1.04958	271
1.0315	1.04687	272
1.03062	1.04263	273
1.02838	1.0494	274
1.02387	1.03853	275
1.03062	1.04659	276
1.02182	1.04006	277
1.03003	1.04559	278
1.02857	1.05001	279
1.03854	1.04905	280
1.02207	1.05076	281
1.02699	1.03689	282
1.02405	1.04071	283
1.02508	1.03839	284
1.01705	1.04174	285
1.02292	1.03835	286
1.02765	1.03621	287
1.0165	1.03857	288
1.02805	1.04153	289
1.02416	1.04423	290
1.02992	1.04306	291
1.03308	1.0417	292
1.02277	1.03835	293
1.02233	1.03821	294
1.02747	1.0586	295
1.03172	1.04833	296
1.02703	1.04181	297
1.01173	1.03532	298
1.03278	1.03939	299
1.01126	1.03515	300
1.03766	1.0473	301
1.0352	1.03892	302
1.01914	1.0401	303
1.03201	1.03115	304
1.01907	1.03971	305
1.03421	1.04021	306
1.02868	1.03985	307
1.02028	1.03147	308
1.02611	1.04014	309
1.02141	1.04092	310
1.0136	1.03957	311
1.02438	1.04038	312
1.0271	1.04915	313
1.03051	1.03051	314
1.01492	1.02381	315
1.01723	1.02588	316
1.02101	1.03336	317
1.02354	1.04791	318
1.02835	1.04416	319
1.01767	1.03989	320
1.007	1.03564	321
1.02061	1.04527	322
1.02042	1.04374	323
1.02937	1.03119	324
1.02871	1.0329	325
1.02622	1.02848	326
1.01078	1.05012	327
1.03183	1.04284	328
1.01976	1.04399	329
1.02123	1.04976	330
1.01445	1.03097	331
1.00968	1.03361	332
1.0183	1.03971	333
1.02339	1.04484	334
1.02809	1.03543	335
1.01357	1.03821	336
1.01309	1.03589	337
1.02486	1.0349	338
1.01863	1.04309	339
1.02596	1.03504	340
1.01441	1.03087	341
1.01525	1.03165	342
1.01734	1.02413	343
1.02145	1.03707	344
1.01089	1.03076	345
1.02526	1.03864	346
1.03249	1.01832	347
1.00979	1.03215	348
1.0132	1.03654	349
1.02471	1.01786	350
1.02413	1.02524	351
1.01929	1.02798	352
1.00682	1.01647	353
1.00693	1.02812	354
1.02226	1.03137	355
1.03088	1.04331	356
1.01437	1.02695	357
1.02537	1.02492	358
1.01954	1.03169	359
1.01925	1.03048	360
1.01544	1.03547	361
1.018	1.02948	362
1.02145	1.03379	363
1.01646	1.02124	364
1.02266	1.02791	365
1.01808	1.03155	366
1.01195	1.02402	367
1.0077	1.0262	368
1.02182	1.02185	369
1.00546	1.035	370
1.00455	1.02734	371
1.01687	1.02253	372
1.00528	1.03511	373
1.00902	1.02335	374
1.01914	1.03301	375
1.0048	1.03579	376
1.01067	1.0313	377
1.01441	1.03554	378
1.01008	1.02527	379
0.998753	1.0313	380
1.01129	1.02987	381
1.01342	1.02584	382
1.00187	1.02328	383
1.01804	1.02467	384
0.99846	1.02174	385
1.02255	1.02238	386
1.01397	1.02092	387
1.02196	1.03033	388
1.00664	1.02067	389
1.02042	1.03572	390
0.999927	1.02017	391
1.01305	1.02909	392
0.997873	1.02392	393
1.00851	1.02377	394
1.00609	1.03258	395
1.01683	1.02527	396
1.00433	1.03793	397
1.00521	1.02634	398
1.01122	1.03023	399
1.01192	1.01486	400
1.01313	1.01761	401
1.01269	1.03839	402
0.996186	1.02834	403
1.00572	1.02128	404
1.00634	1.02748	405
1.01063	1.02035	406
1.01657	1.01248	407
1.01093	1.02456	408
1.00323	1.0154	409
1.00429	1.02167	410
1.00741	1.01572	411
1.01144	1.02153	412
1.00356	1.03311	413
1.00202	1.02595	414
1.01019	1.03222	415
1.00495	1.03718	416
1.01005	1.01426	417
1.00557	1.02837	418
1.00601	1.02128	419
1.00902	1.01825	420
0.99285	1.02331	421
1.00847	1.03033	422
0.99879	1.01864	423
1.00939	1.01985	424
0.993326	1.01704	425
1.00099	1.0303	426
1.00818	1.02271	427
1.00631	1.02117	428
1.00125	1.01946	429
1.0022	1.02413	430
0.998497	1.03176	431
0.99274	1.02898	432
0.990759	1.01454	433
1.00829	1.0268	434
0.993913	1.0211	435
0.999193	1.02317	436
1.00942	1.02345	437
0.993546	1.00745	438
0.99857	1.02078	439
1.0055	1.01119	440
1.00484	1.01907	441
0.99582	1.01704	442
0.990613	1.02516	443
0.99824	1.00749	444
0.988816	1.01294	445
0.996736	1.02527	446
0.99406	1.01358	447
0.998093	1.01522	448
1.00818	1.01472	449
1.00374	1.01608	450
0.994243	1.01786	451
0.983426	1.02196	452
0.992006	1.01533	453
0.998533	1.00909	454
0.999853	1.01273	455
0.99791	1.00606	456
1.00026	1.0098	457
0.996846	1.01718	458
0.998497	1.01426	459
1.00539	1.01807	460
0.983022	1.00848	461
1.00609	1.02089	462
0.99659	1.01508	463
0.989879	1.01315	464
1.00121	1.01668	465
1.00389	1.01761	466
0.998827	1.02534	467
0.994243	1.01308	468
0.995636	1.01985	469
0.986873	1.00959	470
1.00099	1.00706	471
0.9989	1.01155	472
0.989586	1.00891	473
0.982546	1.02367	474
0.996296	1.01679	475
0.987863	1.02238	476
0.99791	1.01205	477
0.99802	1.01308	478
0.988523	1.01034	479
0.993913	1.01048	480
0.986799	1.00228	481
0.988559	1.01255	482
0.997433	1.00471	483
0.986542	1.00898	484
1.0004	1.01073	485
0.986542	1.0062	486
0.990356	1.00324	487
0.991823	1.01255	488
0.99538	1.01052	489
0.99868	1.00656	490
0.989403	1.017	491
0.987239	1.00866	492
0.991419	1.01137	493
0.998203	0.992693	494
1.00191	1.00962	495
0.993656	1.00716	496
0.996333	1.02021	497
0.9945	1.0077	498
0.991273	1.00912	499
0.991676	1.01736	500
0.987826	1.0077	501
0.996113	1.01073	502
0.990759	1.01023	503
0.99857	1.01668	504
0.989696	1.01098	505
0.992226	1.01212	506
0.979685	1.00217	507
0.991933	1.00795	508
0.997213	0.99943	509
0.990466	1.00485	510
0.991383	1.0088	511
0.99219	1.00032	512
0.987679	1.01401	513
0.983279	1.01558	514
0.989329	1.01586	515
0.99362	1.00168	516
0.982692	1.00057	517
0.989843	1.00449	518
0.984929	1.00485	519
0.986616	1.00962	520
0.987313	1.00873	521
0.988119	1.01198	522
0.986689	1.0092	523
0.982619	1.00036	524
0.985406	1.01151	525
0.999377	1.00046	526
0.988633	0.992123	527
0.998937	1.0015	528
0.988413	0.995758	529
0.982839	1.00777	530
0.986726	1.00214	531
0.99351	1.0062	532
0.971288	1.00143	533
0.988119	1.00403	534
0.99252	1.00613	535
0.990283	1.00367	536
0.985919	1.00716	537
0.984929	1.00695	538
0.992593	0.989022	539
0.995343	0.999857	540
0.981115	1.00021	541
0.985552	0.997255	542
0.973048	0.993798	543
0.978255	0.996293	544
0.980529	0.995723	545
0.986322	0.992443	546
0.99857	0.999537	547
0.987203	0.996899	548
0.981849	1.00096	549
0.974992	0.997469	550
0.984122	1.00093	551
1	0.998931	552
	0.99394	553
	1.00656	554
3.5288	0.996043	555
3.86396	0.994261	556
4.16765	0.997826	557
4.37886	0.999002	558
4.56943	0.997719	559
4.68593	0.986313	560
4.81589	1	561
4.87309		562
4.93528		563
4.96406	1.07418	564
4.97771	1.05115	565
4.967	1.04513	566
4.91896	1.0262	567
4.87437	1.0129	568
4.84577	1.01436	569
4.79524	1.02007	570
4.69455	1.02164	571
4.66558	1.0129	572
4.53812	1.00909	573
4.45902	1.0041	574
4.40695	1.00371	575
4.29068	1.00267	576
4.19695	0.995687	577
4.12779	0.999929	578
4.02457	1.00196	579
3.94672	0.990376	580
3.82967	1.00274	581
3.7336	0.993691	582
3.67959	0.994297	583
3.56672	0.994546	584
3.48619	0.986919	585
3.36709	0.981251	586
3.30417	0.990626	587
3.21836	0.984958	588
3.14275	0.991552	589
3.05566	0.989913	590
2.96403	0.988202	591
2.90077	0.986919	592
2.83294	0.988202	593
2.74687	0.981322	594
2.69363	0.988024	595
2.60419	0.996899	596
2.55146	0.970273	597
2.50119	0.984352	598
2.43174	0.977295	599
2.35301	0.986669	600
2.30773	0.971592	601
2.25379	0.972162	602
2.19878	0.984352	603
2.14492	0.971912	604
2.08496	0.981928	605
2.0348	0.97259	606
1.99714	0.989948	607
1.96029	0.985243	608
1.89766	0.986847	609
1.85743	0.983675	610
1.81339	0.981429	611
1.77441	0.978471	612
1.72883	0.975013	613
1.71241	0.986491	614
1.67838	0.982641	615
1.65007	0.980146	616
1.60537	0.980004	617
1.59631	0.980467	618
1.56723	0.975619	619
1.5464	0.983212	620
1.50138	0.97872	621
1.47431	0.967457	622
1.45305	0.965033	623
1.4412	0.962859	624
1.40849	0.972091	625
1.39276	0.977829	626
1.38264	0.972411	627
1.35734	0.960114	628
1.33867	0.959045	629
1.32005	0.974015	630
1.30388	0.976724	631
1.29871	0.971841	632
1.26699	0.977116	633
1.27692	0.973908	634
1.2437	0.964427	635
1.23758	0.968883	636
1.2045	0.969988	637
1.20857	0.970665	638
1.20502	0.976332	639
1.18166	0.969382	640
1.17157	0.976689	641
1.16505	0.965603	642
1.15533	0.972982	643
1.14033	0.968918	644
1.13637	0.968704	645
1.13711	0.968918	646
1.13161	0.980574	647
1.114	0.97316	648
1.11001	0.961825	649
1.09714	0.971306	650
1.09204	0.951524	651
1.07323	0.962502	652
1.07202	0.959651	653
1.0799	0.967885	654
1.06938	0.970807	655
1.06879	0.955409	656
1.05893	0.968241	657
1.05123	0.974336	658
1.05387	0.977615	659
1.05159	0.968205	660
1.05009	0.968704	661
1.03007	0.960684	662
1.03891	0.975619	663
1.0161	0.967706	664
1.0326	0.951809	665
1.02215	0.967243	666
1.00836	0.958082	667
1.01162	0.969203	668
1.02031	0.961255	669
0.99989	0.970736	670
1.00473	0.956977	671
1.01353	0.962467	672
0.996883	0.961433	673
0.998057	0.963144	674
1.00066	0.974229	675
1.00495	0.961219	676
1.00524	0.965853	677
0.999963	0.964284	678
0.991126	0.969524	679
0.993656	0.963322	680
0.987569	0.976332	681
0.988449	0.971556	682
0.984892	0.962823	683
0.977045	0.968526	684
0.979135	0.96129	685
0.996406	0.963785	686
0.968685	0.968526	687
0.980455	0.966922	688
0.984892	0.960863	689
0.974295	0.962538	690
0.986506	0.950383	691
0.969565	0.971342	692
0.981225	0.967671	693
0.968868	0.952843	694
0.987386	0.96129	695
0.963001	0.963073	696
0.982986	0.952094	697
0.977705	0.965496	698
0.963478	0.960684	699
0.968281	0.956977	700
0.969308	0.955445	701
0.966815	0.958688	702
0.965201	0.955944	703
0.963478	0.957975	704
0.962964	0.96268	705
0.958527	0.963108	706
0.963771	0.9563	707
0.959774	0.952736	708
0.963038	0.969738	709
0.968428	0.967956	710
0.961534	0.96849	711
0.961131	0.960257	712
0.971545	0.966601	713
0.954274	0.947888	714
0.959701	0.961148	715
0.963478	0.955587	716
0.959334	0.953912	717
0.95211	0.951381	718
0.953174	0.968847	719
0.94683	0.954874	720
0.956951	0.95213	721
0.957427	0.965532	722
0.955374	0.944003	723
0.960177	0.95548	724
0.956327	0.957334	725
0.965935	0.966637	726
0.954787	0.964213	727
0.964174	0.952094	728
0.952587	0.951346	729
0.961498	0.9563	730
0.959114	0.963999	731
0.958307	0.954625	732
0.94529	0.948886	733
0.952587	0.956478	734
0.951487	0.951845	735
0.939533	0.964391	736
0.945767	0.956478	737
0.959884	0.96514	738
0.95354	0.956193	739
0.948883	0.958439	740
0.958087	0.956193	741
0.958234	0.943326	742
0.951414	0.95794	743
0.951964	0.950276	744
0.949763	0.94689	745
0.952294	0.956585	746
0.944813	0.95327	747
0.959261	0.961005	748
0.949983	0.950027	749
0.95255	0.952344	750
0.94727	0.944751	751
0.949103	0.953449	752
0.949397	0.943753	753
0.946023	0.948922	754
0.94727	0.959009	755
0.940193	0.953449	756
0.942686	0.948993	757
0.94639	0.947532	758
0.94507	0.954554	759
0.94221	0.943005	760
0.94925	0.94828	761
0.943273	0.954197	762
0.960361	0.947746	763
0.947673	0.943504	764
0.956034	0.956514	765
0.951597	0.949813	766
0.95288	0.946142	767
0.948187	0.958867	768
0.946317	0.949314	769
0.944997	0.957833	770
0.948627	0.948173	771
0.95145	0.947746	772
0.952514	0.962574	773
0.946133	0.953128	774
0.949727	0.958653	775
0.94804	0.945429	776
0.947673	0.944787	777
0.937736	0.944466	778
0.942723	0.950597	779
0.938213	0.941757	780
0.948773	0.958688	781
0.935829	0.943932	782
0.95035	0.945607	783
0.940376	0.957084	784
0.9432	0.946712	785
0.935133	0.939832	786
0.933886	0.948173	787
0.951854	0.94026	788
0.948517	0.949385	789
0.937333	0.950526	790
0.954384	0.942149	791
0.949653	0.958261	792
0.949947	0.950597	793
0.938616	0.940724	794
0.9399	0.946712	795
0.937443	0.948957	796
0.946537	0.951203	797
0.939936	0.953876	798
0.941916	0.951096	799
0.94419	0.94771	800
0.945107	0.938442	801
0.935609	0.960114	802
0.942136	0.94828	803
0.94738	0.950027	804
0.936049	0.951096	805
0.948003	0.949635	806
0.940706	0.937908	807
0.937516	0.945108	808
0.939533	0.947068	809
0.943493	0.939939	810
0.937479	0.939761	811
0.941	0.945536	812
0.928532	0.946498	813
0.944703	0.941223	814
0.934106	0.94304	815
0.937736	0.940118	816
0.930476	0.942114	817
0.944226	0.935912	818
0.932382	0.950633	819
0.937259	0.936945	820
0.940926	0.939048	821
0.938396	0.937052	822
0.93968	0.946926	823
0.942136	0.941864	824
0.937443	0.944858	825
0.935206	0.944787	826
0.940083	0.951132	827
0.935059	0.958617	828
0.940046	0.940973	829
0.94122	0.943183	830
0.940413	0.939191	831
0.936013	0.943076	832
0.94694	0.936874	833
0.939276	0.939262	834
0.940266	0.943789	835
0.932529	0.93527	836
0.935536	0.936411	837
0.932602	0.941508	838
0.936269	0.942827	839
0.932822	0.930993	840
0.932236	0.941579	841
0.939643	0.942042	842
0.945033	0.93944	843
0.923692	0.929995	844
0.931429	0.932169	845
0.940633	0.934664	846
0.933812	0.940474	847
0.927139	0.938264	848
0.936929	0.943361	849
0.935609	0.947959	850
0.930842	0.946355	851
0.929632	0.943896	852
0.938249	0.940118	853
0.933886	0.94304	854
0.94122	0.935199	855
0.94023	0.934771	856
0.940046	0.934807	857
0.930146	0.935626	858
0.929852	0.943005	859
0.926662	0.931813	860
0.937809	0.937159	861
0.921932	0.942506	862
0.936563	0.934129	863
0.937186	0.941187	864
0.931979	0.943326	865
0.924535	0.928391	866
0.931576	0.938549	867
0.929046	0.935413	868
0.935389	0.935912	869
0.926185	0.927892	870
0.929302	0.936945	871
0.935206	0.932525	872
0.935536	0.939619	873
0.922555	0.937266	874
0.929119	0.937052	875
0.930109	0.928997	876
0.923508	0.930137	877
0.926515	0.938478	878
0.934876	0.933666	879
0.94001	0.943361	880
0.934766	0.941472	881
0.936159	0.92782	882
0.934289	0.933345	883
0.934289	0.935234	884
0.925085	0.938157	885
0.925379	0.940367	886
0.923398	0.941615	887
0.922372	0.930957	888
0.933446	0.936482	889
0.934106	0.933274	890
0.927212	0.922759	891
0.920172	0.936375	892
0.927285	0.931741	893
0.920978	0.927143	894
0.926112	0.924327	895
0.920502	0.927428	896
0.925269	0.934664	897
0.926405	0.936767	898
0.922298	0.928248	899
0.925305	0.938728	900
0.924022	0.922367	901
0.925452	0.923757	902
0.929926	0.933595	903
0.931136	0.939832	904
0.923288	0.931563	905
0.920208	0.932597	906
0.935133	0.929638	907
0.931062	0.930173	908
0.929412	0.922688	909
0.923252	0.931706	910
0.923105	0.93944	911
0.921125	0.929567	912
0.918852	0.93609	913
0.922078	0.93085	914
0.929669	0.923008	915
0.920905	0.929603	916
0.931832	0.934949	917
0.926919	0.92643	918
0.926185	0.933131	919
0.927065	0.924684	920
0.913535	0.920442	921
0.928569	0.91727	922
0.926552	0.919301	923
0.928715	0.921547	924
0.916981	0.936411	925
0.929009	0.921191	926
0.922665	0.931064	927
0.919732	0.926573	928
0.925379	0.936553	929
0.931099	0.945749	930
0.923032	0.925967	931
0.922482	0.924969	932
0.928532	0.921404	933
0.924865	0.925468	934
0.914378	0.922189	935
0.912288	0.921903	936
0.915185	0.932632	937
0.922958	0.926822	938
0.922335	0.909464	939
0.929852	0.91481	940
0.921308	0.928106	941
0.918742	0.926323	942
0.917531	0.922367	943
0.927982	0.94411	944
0.922995	0.93003	945
0.918595	0.921191	946
0.926222	0.925896	947
0.920025	0.92005	948
0.912214	0.929638	949
0.915551	0.922759	950
0.919475	0.923115	951
0.920062	0.932098	952
0.927359	0.926109	953
0.913058	0.923115	954
0.911371	0.927036	955
0.921602	0.933274	956
0.922995	0.926288	957
0.929009	0.9198	958
0.919512	0.926145	959
0.914231	0.926644	960
0.909501	0.924791	961
0.924829	0.918874	962
0.919952	0.933381	963
0.925855	0.926502	964
0.915515	0.93085	965
0.917531	0.915915	966
0.919328	0.925325	967
0.900334	0.926074	968
0.925085	0.917377	969
0.914855	0.923971	970
0.920538	0.927464	971
0.922482	0.934308	972
0.913168	0.922117	973
0.917898	0.913313	974
0.919768	0.916806	975
0.916688	0.923294	976
0.916798	0.921404	977
0.904257	0.918731	978
0.917385	0.922509	979
0.921785	0.913919	980
0.923105	0.915381	981
0.911298	0.930173	982
0.916065	0.914062	983
0.918962	0.934985	984
0.907044	0.924505	985
0.914855	0.918339	986
0.917128	0.921048	987
0.921162	0.921333	988
0.910014	0.909784	989
0.910271	0.92201	990
0.914048		991
		992
