# Supplementary material for: Optogenetic manipulation of Gq- and Gi/o-coupled receptor signaling in neurons and heart muscle cells
Source: eLife. 2023 Aug 17;12:e83974. doi: 10.7554/eLife.83974 (PMC10435233; doi:10.7554/eLife.83974)
Supplement: Figure 2—source data 1. [file elife-83974-fig2-data1.xlsx]

## Sheet: C
time	positon
-0.995502	-0.0237592
-0.98051	-0.0237592
-0.965518	-0.0237592
-0.950525	-0.0237592
-0.935533	-0.0237592
-0.92054	-0.0237592
-0.905548	-0.0237592
-0.890555	-0.0237592
-0.875563	-0.0237592
-0.86057	-0.0237592
-0.845578	-0.0237592
-0.830585	-0.0237592
-0.815592	-0.0237592
-0.8006	-0.0237592
-0.785608	-0.0237592
-0.770615	-0.0237592
-0.755622	-0.0237592
-0.74063	-0.0237592
-0.725637	-0.0237592
-0.710645	-0.0237592
-0.695653	-0.0237592
-0.68066	-0.0237592
-0.665668	-0.0237592
-0.650675	-0.0237592
-0.635683	-0.0237592
-0.62069	-0.0237592
-0.605697	-0.0237592
-0.590705	-0.0237592
-0.575713	-0.0237592
-0.56072	-0.0237592
-0.545727	-0.0237592
-0.530735	-0.0237592
-0.515742	-0.0237592
-0.50075	-0.0237592
-0.485757	-0.0237592
-0.470765	-0.0237592
-0.455773	-0.0237592
-0.44078	-0.0237592
-0.425788	-0.0237592
-0.410795	-0.0237592
-0.395803	-0.0237592
-0.38081	-0.0237592
-0.365818	-0.0237592
-0.350825	-0.0237592
-0.335832	-0.0237592
-0.32084	-0.0237592
-0.305848	-0.0237592
-0.290855	-0.0237592
-0.275862	-0.0237592
-0.26087	-0.0237592
-0.245877	-0.0237592
-0.230885	-0.0237592
-0.215892	-0.0237592
-0.2009	-0.0237592
-0.185908	-0.0237592
-0.170915	-0.0237592
-0.155923	-0.0237592
-0.14093	-0.0237592
-0.125938	-0.0237592
-0.110945	-0.0237592
-0.095953	-0.0237592
-0.08096	-0.0237592
-0.065967	-0.0237592
-0.050975	-0.0237592
-0.035983	-0.0237592
-0.02099	-0.0237592
-0.005997	-0.0237592
0.008995	-0.0237592
0.023988	-0.0237592
0.03898	-0.0237592
0.053972	-0.0237592
0.068965	-0.0237592
0.083957	-0.0237592
0.09895	-0.0237592
0.113943	-0.0237592
0.128935	-0.0237592
0.143927	-0.0237592
0.15892	-0.0237592
0.173912	-0.0237592
0.188905	-0.0237592
0.203898	-0.0237592
0.21889	-0.0237592
0.233882	-0.0237592
0.248875	-0.0237592
0.263867	-0.0237592
0.27886	-0.0237592
0.293852	-0.0237592
0.308845	-0.0237592
0.323838	-0.0237592
0.33883	-0.0237592
0.353822	-0.0237592
0.368815	-0.0237592
0.383808	-0.0237592
0.3988	-0.0237592
0.413793	-0.0237592
0.428785	-0.0237592
0.443777	-0.0237592
0.45877	-0.0237592
0.473762	-0.0237592
0.488755	-0.0237592
0.503747	-0.0237592
0.51874	-0.0237592
0.533733	-0.0237592
0.548725	-0.0237592
0.563717	-0.0237592
0.57871	-0.0237592
0.593703	-0.0237592
0.608695	-0.0237592
0.623687	-0.0237592
0.63868	-0.0237592
0.653673	-0.0237592
0.668665	-0.0237592
0.683657	-0.0237592
0.69865	-0.0237592
0.713642	-0.0237592
0.728635	-0.0237592
0.743628	-0.0237592
0.75862	-0.0237592
0.773612	-0.0237592
0.788605	-0.0237592
0.803597	-0.0237592
0.81859	-0.0237592
0.833582	-0.0237592
0.848575	-0.0237592
0.863568	-0.0237592
0.87856	-0.0237592
0.893552	-0.0237592
0.908545	-0.0237592
0.923538	-0.0237592
0.93853	-0.0237592
0.953523	-0.0237592
0.968515	-0.0237592
0.983507	-0.0237592
0.9985	-0.0237592
1.01349	-0.0237592
1.02848	-0.0237592
1.04348	-0.0237592
1.05847	-0.0237592
1.07346	-0.0237592
1.08846	-0.0237592
1.10345	-0.0237592
1.11844	-0.0237592
1.13343	-0.0237592
1.14843	-0.0237592
1.16342	-0.0237592
1.17841	-0.0237592
1.1934	-0.0237592
1.20839	-0.0237592
1.22339	-0.0237592
1.23838	-0.0237592
1.25337	-0.0237592
1.26837	-0.0237592
1.28336	-0.0237592
1.29835	-0.0237592
1.31334	-0.0237592
1.32834	-0.0237592
1.34333	-0.0237592
1.35832	-0.0237592
1.37331	-0.0237592
1.3883	-0.0237592
1.4033	-0.0237592
1.41829	-0.0237592
1.43328	-0.0237592
1.44828	-0.0237592
1.46327	-0.0237592
1.47826	-0.0237592
1.49325	-0.0237592
1.50825	-0.0237592
1.52324	-0.0237592
1.53823	-0.0237592
1.55322	-0.0237592
1.56821	-0.0237592
1.58321	-0.0237592
1.5982	-0.0237592
1.61319	-0.0237592
1.62819	-0.0237592
1.64318	-0.0237592
1.65817	-0.0237592
1.67316	-0.0237592
1.68816	-0.0237592
1.70315	-0.0237592
1.71814	-0.0237592
1.73313	-0.0237592
1.74812	-0.0237592
1.76312	-0.0237592
1.77811	-0.0237592
1.7931	-0.0237592
1.80809	-0.0237592
1.82309	-0.0237592
1.83808	-0.0237592
1.85307	-0.0237592
1.86807	-0.0237592
1.88306	-0.0237592
1.89805	-0.0237592
1.91304	-0.0237592
1.92803	-0.0237592
1.94303	-0.0237592
1.95802	-0.0237592
1.97301	-0.0237592
1.988	-0.0237592
2.003	-0.0237592
2.01799	-0.0237592
2.03298	-0.0237592
2.04798	-0.0237592
2.06297	-0.0237592
2.07796	-0.0237592
2.09295	-0.0237592
2.10794	-0.0237592
2.12294	-0.0237592
2.13793	-0.0237592
2.15292	-0.0237592
2.16791	-0.0237592
2.18291	-0.0237592
2.1979	-0.0237592
2.21289	-0.0237592
2.22788	-0.0237592
2.24288	-0.0237592
2.25787	-0.0237592
2.27286	-0.0237592
2.28786	-0.0237592
2.30285	-0.0237592
2.31784	-0.0237592
2.33283	-0.0237592
2.34783	-0.0237592
2.36282	-0.0237592
2.37781	-0.0237592
2.3928	-0.0237592
2.4078	-0.0237592
2.42279	-0.0237592
2.43778	-0.0237592
2.45277	-0.0237592
2.46776	-0.0237592
2.48276	-0.0237592
2.49775	-0.0237592
2.51274	-0.0237592
2.52773	-0.0237592
2.54273	-0.0237592
2.55772	-0.0237592
2.57271	-0.0237592
2.5877	-0.0237592
2.6027	-0.0237592
2.61769	-0.0237592
2.63268	-0.0237592
2.64767	-0.0237592
2.66267	-0.0237592
2.67766	-0.0237592
2.69265	-0.0237592
2.70765	-0.0237592
2.72264	-0.0237592
2.73763	-0.0237592
2.75262	-0.0237592
2.76762	-0.0237592
2.78261	-0.0237592
2.7976	-0.0237592
2.81259	-0.0237592
2.82759	-0.0237592
2.84258	-0.0237592
2.85757	-0.0237592
2.87256	-0.0237592
2.88755	-0.0237592
2.90255	-0.0237592
2.91754	-0.0237592
2.93253	-0.0237592
2.94752	-0.0237592
2.96252	-0.0237592
2.97751	-0.0237592
2.9925	-0.0237592
3.00749	-0.0237592
3.02249	-0.0237592
3.03748	-0.0237592
3.05247	-0.0237592
3.06747	-0.0237592
3.08246	-0.0237592
3.09745	0.488594
3.11244	-0.86692
3.12744	0.538664
3.14243	-0.779754
3.15742	-0.999272
3.17241	-0.742366
3.18741	0.682166
3.2024	-0.281904
3.21739	0.6724
3.23238	-0.375264
3.24737	0.551709
3.26237	-0.328985
3.27736	0.397347
3.29235	-0.269514
3.30734	0.222943
3.32234	0.418847
3.33733	-0.473362
3.35232	0.498069
3.36731	-0.439472
3.38231	0.320749
3.3973	-0.330807
3.41229	0.242402
3.42729	-0.262445
3.44228	-0.503389
3.45727	0.267182
3.47226	-0.334014
3.48726	0.31368
3.50225	-0.273668
3.51724	0.195248
3.53223	0.419649
3.54723	-0.555572
3.56222	0.338387
3.57721	-0.413017
3.5922	0.302456
3.60719	0.85606
3.62219	-0.350193
3.63718	0.518621
3.65217	-0.372276
3.66716	0.470666
3.68216	-0.192042
3.69715	0.404417
3.71214	0.655273
3.72713	-0.10043
3.74213	0.68377
3.75712	-0.146709
3.77211	0.790613
3.78711	0.30231
3.8021	0.0889148
3.81709	0.927921
3.83208	-0.0341812
3.84708	0.707164
3.86207	0.314846
3.87706	0.73158
3.89205	1.04708
3.90705	0.0558997
3.92204	1.03498
3.93703	0.304132
3.95202	0.761825
3.96701	1.05685
3.98201	0.174842
3.997	1.11311
4.01199	0.176372
4.02698	0.618177
4.04198	0.986226
4.05697	0.0464981
4.07196	0.756578
4.08695	0.345237
4.10195	0.0177101
4.11694	0.722688
4.13193	0.0812623
4.14693	0.414037
4.16192	0.687341
4.17691	0.0261643
4.1919	1.23205
4.2069	0.351578
4.22189	0.924714
4.23688	0.379564
4.25187	0.0768166
4.26687	0.759857
4.28186	-0.130165
4.29685	0.500401
4.31184	-0.162015
4.32683	-0.372932
4.34183	0.505357
4.35682	-0.281029
4.37181	0.314846
4.3868	0.606662
4.4018	-0.328183
4.41679	0.576926
4.43178	-0.185628
4.44677	0.417025
4.46177	0.493259
4.47676	-0.319656
4.49175	0.506523
4.50674	-0.162962
4.52174	0.325414
4.53673	0.581955
4.55172	-0.122877
4.56672	0.533052
4.58171	-0.10524
4.5967	0.787771
4.61169	0.262955
4.62669	-0.0780556
4.64168	0.811093
4.65667	-0.144086
4.67166	0.632534
4.68666	1.01152
4.70165	-0.114933
4.71664	0.717149
4.73163	-0.209752
4.74662	0.37162
4.76162	0.147803
4.77661	-0.248379
4.7916	0.477662
4.80659	-0.23424
4.82159	0.255594
4.83658	0.442971
4.85157	-0.127833
4.86656	0.468917
4.88156	0.0229575
4.89655	0.379637
4.91154	0.901174
4.92654	-0.0136288
4.94153	0.596677
4.95652	0.29065
4.97151	-0.170906
4.98651	0.471176
5.0015	-0.155237
5.01649	0.245026
5.03148	0.662634
5.04648	-0.346695
5.06147	0.368997
5.07646	-0.17506
5.09145	0.49734
5.10644	-0.281102
5.12144	0.649297
5.13643	-0.240434
5.15142	0.565702
5.16641	-0.285183
5.18141	0.277385
5.1964	0.580789
5.21139	-0.332556
5.22638	0.404052
5.24138	-0.0760149
5.25637	-0.388529
5.27136	0.473289
5.28636	0.0120254
5.30135	0.304497
5.31634	0.546608
5.33133	-0.224182
5.34633	0.48065
5.36132	0.139276
5.37631	-0.188252
5.3913	-0.202391
5.4063	0.211428
5.42129	-0.165586
5.43628	0.139859
5.45127	-0.17353
5.46626	0.495081
5.48126	-0.323738
5.49625	0.531303
5.51124	-0.259529
5.52623	-0.479266
5.54123	0.461774
5.55622	-0.419795
5.57121	0.482108
5.5862	-0.277822
5.6012	0.363676
5.61619	-0.146199
5.63118	-0.422127
5.64618	0.603746
5.66117	-0.342614
5.67616	0.312441
5.69115	0.576635
5.70615	-0.477808
5.72114	0.601706
5.73613	-0.405656
5.75112	0.592814
5.76612	-0.51352
5.78111	-0.0250711
5.7961	-0.45813
5.81109	0.703302
5.82608	-0.306975
5.84108	-0.245099
5.85607	0.743969
5.87106	0.0462066
5.88605	-0.259529
5.90105	0.521026
5.91604	-0.283143
5.93103	0.442971
5.94602	-0.0185847
5.96102	-0.407696
5.97601	0.79812
5.991	0.0933606
6.006	0.686248
6.02099	0.247941
6.03598	-0.137308
6.05097	0.57576
6.06597	-0.252168
6.08096	0.702937
6.09595	-0.58866
6.11094	-0.163545
6.12594	0.59726
6.14093	-0.396837
6.15592	-0.431601
6.17091	0.712485
6.1859	-0.304934
6.2009	0.354858
6.21589	0.84112
6.23088	-0.0996284
6.24587	0.601706
6.26087	-0.0295168
6.27586	0.133081
6.29085	0.451498
6.30584	-0.222433
6.32084	0.379929
6.33583	-0.111071
6.35082	-0.338459
6.36581	0.386196
6.38081	-0.371474
6.3958	0.144304
6.41079	0.363458
6.42578	-0.114642
6.44078	0.618833
6.45577	-0.317907
6.47076	0.475913
6.48575	-0.112018
6.50075	0.268858
6.51574	-0.482982
6.53073	0.41841
6.54572	-0.6767
6.56072	-0.692078
6.57571	-0.474674
6.5907	0.353036
6.6057	0.172509
6.62069	-0.551272
6.63568	-0.562714
6.65067	0.609941
6.66567	-0.0978792
6.68066	-0.0175643
6.69565	-0.342614
6.71064	0.459806
6.72564	-0.428686
6.74063	0.652941
6.75562	-0.656148
6.77061	0.439108
6.78561	-0.382407
6.8006	0.349027
6.81559	-0.275417
6.83058	0.198819
6.84558	0.424459
6.86057	-0.264194
6.87556	-0.0427083
6.89055	0.12674
6.90555	-0.0508709
6.92054	-0.0862182
6.93553	-0.234385
6.95052	-0.191969
6.96551	-0.539611
6.98051	-0.34961
6.9955	-0.0326507
7.01049	-0.0326507
7.02548	-0.0326507
7.04048	-0.362291
7.05547	-0.503681
7.07046	-0.503681
7.08545	-0.503681
7.10045	-0.496611
7.11544	-0.454778
7.13043	-0.405583
7.14542	-0.405583
7.16042	-0.391444
7.17541	-0.391444
7.1904	-0.342832
7.20539	-0.314846
7.22039	-0.300999
7.23538	-0.28686
7.25037	-0.28686
7.26536	-0.28686
7.28036	-0.259165
7.29535	-0.189053
7.31034	-0.181984
7.32534	-0.174914
7.34033	-0.167845
7.35532	-0.167845
7.37031	-0.167845
7.38531	-0.167845
7.4003	-0.160775
7.41529	-0.160775
7.43028	-0.160775
7.44528	-0.160775
7.46027	-0.665841
7.47526	-0.750747
7.49025	-0.271628
7.50525	-0.983529
7.52024	-0.103127
7.53523	-1.13403
7.55022	0.164347
7.56522	-0.701407
7.58021	0.517237
7.5952	-0.823483
7.61019	0.449166
7.62519	0.576999
7.64018	-0.423949
7.65517	0.800234
7.67016	-0.272284
7.68515	0.857372
7.70015	-0.172728
7.71514	0.584651
7.73013	-0.295824
7.74512	0.303331
7.76012	0.247358
7.77511	-0.798849
7.7901	-0.748342
7.80509	-0.572189
7.82009	-0.118213
7.83508	0.587567
7.85007	-0.110561
7.86506	0.459733
7.88006	-0.0837403
7.89505	-0.372641
7.91004	0.199986
7.92503	-0.267182
7.94003	-0.189126
7.95502	-0.037388
7.97001	-0.122221
7.985	-0.266161
8	-0.315648
8.01499	-0.331827
8.02998	-0.281685
8.04498	-0.392756
8.05997	-0.413673
8.07496	-0.390205
8.08995	-0.252751
8.10494	-0.311056
8.11994	-0.541725
8.13493	-0.111071
8.14992	-0.130165
8.16491	-0.330151
8.17991	0.26536
8.1949	-0.223599
8.20989	-0.30661
8.22489	0.118432
8.23988	0.0191677
8.25487	0.0180016
8.26986	-0.0111508
8.28486	-0.0123169
8.29985	-0.0128999
8.31484	-0.0155237
8.32983	-0.0155237
8.34482	-0.0163982
8.35982	-0.0166897
8.37481	-0.0166897
8.3898	-0.0166897
8.4048	-0.0166897
8.41979	-0.0166897
8.43478	-0.0166897
8.44977	-0.0166897
8.46476	-0.0166897
8.47976	-0.0166897
8.49475	-0.0166897
8.50974	-0.0166897
8.52473	-0.0166897
8.53973	0.895708
8.55472	0.497049
8.56971	0.713505
8.5847	1.17295
8.5997	0.138911
8.61469	0.69441
8.62968	1.19795
8.64467	0.478828
8.65967	0.940384
8.67466	0.16165
8.68965	0.0541506
8.70465	1.16836
8.71964	0.868086
8.73463	0.474018
8.74962	0.923475
8.76461	-0.29925
8.77961	0.265943
8.7946	-0.0475184
8.80959	-0.289629
8.82458	0.364551
8.83958	-0.0507252
8.85457	0.946943
8.86956	0.208075
8.88456	-0.0204796
8.89955	0.620436
8.91454	-0.0625319
8.92953	0.381022
8.94453	-0.390934
8.95952	0.277385
8.97451	-0.171198
8.9895	-0.30661
9.00449	0.405
9.01949	0.185555
9.03448	0.0353473
9.04947	0.402012
9.06447	0.119889
9.07946	0.455288
9.09445	0.199038
9.10944	0.204358
9.12444	0.721303
9.13943	-0.0100576
9.15442	0.539247
9.16941	0.3104
9.1844	-0.14496
9.1994	0.544567
9.21439	0.171999
9.22938	-0.175862
9.24437	0.377305
9.25937	0.191167
9.27436	0.0132643
9.28935	0.355805
9.30434	0.616428
9.31934	0.296043
9.33433	0.571387
9.34932	0.34961
9.36432	0.34327
9.37931	0.337949
9.3943	0.373297
9.40929	0.394796
9.42428	0.408935
9.43928	0.408935
9.45427	0.408935
9.46926	0.408935
9.48425	0.408935
9.49925	0.372713
9.51424	0.344144
9.52923	0.344144
9.54423	0.294366
9.55922	0.272867
9.57421	0.265506
9.5892	0.265214
9.60419	0.264923
9.61919	0.264923
9.63418	0.257853
9.64917	0.243131
9.66416	1.21004
9.67916	0.0986809
9.69415	0.852198
9.70914	0.346622
9.72414	-0.409081
9.73913	0.2975
9.75412	0.63647
9.76911	-0.376722
9.78411	0.498943
9.7991	0.134611
9.81409	-0.183806
9.82908	0.445667
9.84407	0.133445
9.85907	-0.166606
9.87406	0.168574
9.88905	0.392391
9.90404	0.0952555
9.91904	0.826908
9.93403	-0.0656658
9.94902	0.594272
9.96401	-0.34757
9.97901	0.688798
9.994	-0.140879
10.009	-0.370308
10.024	0.750091
10.039	-0.137308
10.054	0.351359
10.069	0.677137
10.0839	-0.197362
10.099	0.434735
10.1139	0.00765251
10.1289	-0.21529
10.1439	0.217987
10.1589	0.452445
10.1739	-0.0800962
10.1889	0.123752
10.2039	0.301654
10.2189	-0.075942
10.2339	0.0919758
10.2489	0.404781
10.2639	-0.14015
10.2789	0.301654
10.2939	-0.124554
10.3088	0.315502
10.3238	0.518111
10.3388	-0.298958
10.3538	0.34757
10.3688	-0.199694
10.3838	-0.286568
10.3988	0.282487
10.4138	-0.297792
10.4288	0.340136
10.4438	0.0697471
10.4588	-0.143503
10.4738	0.416442
10.4887	-0.138766
10.5037	0.123388
10.5187	0.504555
10.5337	-0.105167
10.5487	0.377597
10.5637	-0.124918
10.5787	0.0629692
10.5937	0.337512
10.6087	-0.302529
10.6237	-0.0474455
10.6387	0.391152
10.6537	-0.308432
10.6687	0.257124
10.6837	-0.238321
10.6987	0.101888
10.7136	0.318126
10.7286	-0.368486
10.7436	0.183223
10.7586	0.35289
10.7736	-0.464835
10.7886	0.364624
10.8036	-0.26485
10.8186	-0.651119
10.8336	0.223307
10.8486	-0.359376
10.8636	-0.477516
10.8786	0.171708
10.8935	-0.537279
10.9085	0.0809708
10.9235	-0.964289
10.9385	0.227024
10.9535	0.512208
10.9685	-0.449822
10.9835	0.561475
10.9985	-0.387946
11.0135	0.142264
11.0285	0.366446
11.0435	-0.363822
11.0585	0.124044
11.0735	0.299031
11.0884	-0.498142
11.1034	0.0706946
11.1184	0.130311
11.1334	-0.434152
11.1484	-0.592596
11.1634	-0.335107
11.1784	-0.237592
11.1934	-0.252023
11.2084	-0.252023
11.2234	-0.252023
11.2384	-0.252023
11.2534	-0.252023
11.2684	-0.252023
11.2834	-0.252023
11.2983	-0.245245
11.3133	-0.245245
11.3283	-0.245245
11.3433	-0.224619
11.3583	-0.217841
11.3733	-1.31784
11.3883	-0.336127
11.4033	-0.896436
11.4183	0.113403
11.4333	-0.597989
11.4483	0.0509438
11.4633	0.255667
11.4783	-0.651994
11.4932	0.348153
11.5082	-0.357336
11.5232	-0.347351
11.5382	0.113767
11.5532	-0.712048
11.5682	-0.0615845
11.5832	-0.876831
11.5982	0.167553
11.6132	-0.692661
11.6282	0.440639
11.6432	-0.524087
11.6582	0.308724
11.6732	-0.466293
11.6882	0.201516
11.7032	0.303768
11.7181	-0.665185
11.7331	0.047154
11.7481	-0.485752
11.7631	-0.693754
11.7781	-0.0382625
11.7931	-1.42599
11.8081	-0.628963
11.8231	-1.17317
11.8381	-0.699731
11.8531	0.169959
11.8681	-0.505211
11.8831	0.388529
11.898	-0.257197
11.913	-0.167043
11.928	0.221777
11.943	-0.308141
11.958	0.0365134
11.973	-0.00291524
11.988	-0.550033
12.003	0.0314846

## Sheet: D
time	positon
-0.995502	0.0289054
-0.98051	0.0289054
-0.965518	0.0289054
-0.950525	0.0289054
-0.935533	0.0289054
-0.92054	0.0289054
-0.905548	0.0289054
-0.890555	0.0289054
-0.875563	0.0289054
-0.86057	0.0289054
-0.845578	0.0289054
-0.830585	0.0289054
-0.815592	0.0289054
-0.8006	0.0289054
-0.785608	0.0289054
-0.770615	0.0289054
-0.755622	0.0289054
-0.74063	0.0289054
-0.725637	0.0289054
-0.710645	0.0289054
-0.695653	0.0289054
-0.68066	0.0289054
-0.665668	0.0289054
-0.650675	0.0289054
-0.635683	0.0289054
-0.62069	0.0289054
-0.605697	0.0289054
-0.590705	0.0289054
-0.575713	0.0289054
-0.56072	0.0289054
-0.545727	0.0289054
-0.530735	0.0289054
-0.515742	0.0289054
-0.50075	0.0289054
-0.485757	0.0289054
-0.470765	0.0289054
-0.455773	0.0289054
-0.44078	0.0289054
-0.425788	0.0289054
-0.410795	0.0289054
-0.395803	0.0289054
-0.38081	0.0289054
-0.365818	0.0289054
-0.350825	0.0289054
-0.335832	0.0289054
-0.32084	0.0289054
-0.305848	0.0289054
-0.290855	0.0289054
-0.275862	0.0289054
-0.26087	0.0289054
-0.245877	0.0289054
-0.230885	0.0289054
-0.215892	0.0289054
-0.2009	0.0289054
-0.185908	0.0289054
-0.170915	0.0289054
-0.155923	0.0289054
-0.14093	0.0289054
-0.125938	0.0289054
-0.110945	0.0289054
-0.095953	0.0289054
-0.08096	0.0289054
-0.065967	0.0289054
-0.050975	0.0289054
-0.035983	0.0289054
-0.02099	0.0289054
-0.005997	0.0289054
0.008995	0.0289054
0.023988	0.0289054
0.03898	0.0289054
0.053972	0.0289054
0.068965	0.0289054
0.083957	0.0289054
0.09895	0.0289054
0.113943	0.0289054
0.128935	0.0289054
0.143927	0.0289054
0.15892	0.0289054
0.173912	0.0289054
0.188905	0.0289054
0.203898	0.0289054
0.21889	0.0289054
0.233882	0.0289054
0.248875	0.0289054
0.263867	0.0289054
0.27886	0.0289054
0.293852	0.0289054
0.308845	0.0289054
0.323838	0.0289054
0.33883	0.0289054
0.353822	0.0289054
0.368815	0.0289054
0.383808	0.0289054
0.3988	0.0289054
0.413793	0.0289054
0.428785	0.0289054
0.443777	0.0289054
0.45877	0.0289054
0.473762	0.0289054
0.488755	0.0289054
0.503747	0.0289054
0.51874	0.0289054
0.533733	0.0289054
0.548725	0.0289054
0.563717	0.0289054
0.57871	0.0289054
0.593703	0.0289054
0.608695	0.0289054
0.623687	0.0289054
0.63868	0.0289054
0.653673	0.0289054
0.668665	0.0289054
0.683657	0.0289054
0.69865	0.0289054
0.713642	0.0289054
0.728635	0.0289054
0.743628	0.0289054
0.75862	0.0289054
0.773612	0.0289054
0.788605	0.0289054
0.803597	0.0289054
0.81859	0.0289054
0.833582	0.0289054
0.848575	0.0289054
0.863568	0.0289054
0.87856	0.0289054
0.893552	0.0289054
0.908545	0.0289054
0.923538	0.0289054
0.93853	0.0289054
0.953523	0.0289054
0.968515	0.0289054
0.983507	0.0289054
0.9985	0.0289054
1.01349	0.0289054
1.02848	0.0289054
1.04348	0.0289054
1.05847	0.0289054
1.07346	0.0289054
1.08846	0.0289054
1.10345	0.0289054
1.11844	0.0289054
1.13343	0.0289054
1.14843	0.0289054
1.16342	0.0289054
1.17841	0.0289054
1.1934	0.0289054
1.20839	0.0289054
1.22339	0.0289054
1.23838	0.0289054
1.25337	0.0289054
1.26837	0.0289054
1.28336	0.0289054
1.29835	0.0289054
1.31334	0.0289054
1.32834	0.0289054
1.34333	0.0289054
1.35832	0.0289054
1.37331	0.0289054
1.3883	0.0289054
1.4033	0.0289054
1.41829	0.0289054
1.43328	0.0289054
1.44828	0.0289054
1.46327	0.0289054
1.47826	0.0289054
1.49325	0.0289054
1.50825	0.0289054
1.52324	0.0289054
1.53823	0.0289054
1.55322	0.0289054
1.56821	0.0289054
1.58321	0.0289054
1.5982	0.0289054
1.61319	0.0289054
1.62819	0.0289054
1.64318	0.0289054
1.65817	0.0289054
1.67316	0.0289054
1.68816	0.0289054
1.70315	0.0289054
1.71814	0.0289054
1.73313	0.0289054
1.74812	0.0289054
1.76312	0.0289054
1.77811	0.0289054
1.7931	0.0289054
1.80809	0.0289054
1.82309	0.0289054
1.83808	0.0289054
1.85307	0.0289054
1.86807	0.0289054
1.88306	0.0289054
1.89805	0.0289054
1.91304	0.0289054
1.92803	0.0289054
1.94303	0.0289054
1.95802	0.0289054
1.97301	0.0289054
1.988	0.0289054
2.003	0.0289054
2.01799	0.0289054
2.03298	0.0289054
2.04798	0.0289054
2.06297	0.0289054
2.07796	0.0289054
2.09295	0.0289054
2.10794	0.0289054
2.12294	0.0289054
2.13793	0.0289054
2.15292	0.0289054
2.16791	0.0289054
2.18291	0.0289054
2.1979	0.0289054
2.21289	0.0289054
2.22788	0.0289054
2.24288	0.0289054
2.25787	0.0289054
2.27286	0.0289054
2.28786	0.0289054
2.30285	0.0289054
2.31784	0.0289054
2.33283	0.0289054
2.34783	0.0289054
2.36282	0.0289054
2.37781	0.0289054
2.3928	0.0289054
2.4078	0.0289054
2.42279	0.0289054
2.43778	0.0289054
2.45277	0.0289054
2.46776	0.0289054
2.48276	0.0289054
2.49775	0.0289054
2.51274	0.0289054
2.52773	0.0289054
2.54273	0.0289054
2.55772	0.0289054
2.57271	0.0289054
2.5877	0.0289054
2.6027	0.0289054
2.61769	0.0289054
2.63268	0.0289054
2.64767	0.0289054
2.66267	0.0289054
2.67766	0.0289054
2.69265	0.0289054
2.70765	0.0289054
2.72264	0.0289054
2.73763	0.0289054
2.75262	0.0289054
2.76762	0.0289054
2.78261	0.0289054
2.7976	0.0289054
2.81259	0.0289054
2.82759	0.0289054
2.84258	0.0289054
2.85757	0.0289054
2.87256	0.0289054
2.88755	0.0289054
2.90255	0.0289054
2.91754	0.0289054
2.93253	0.0289054
2.94752	0.0289054
2.96252	0.0289054
2.97751	0.0289054
2.9925	0.0289054
3.00749	0.0289054
3.02249	0.0289054
3.03748	0.0289054
3.05247	0.0289054
3.06747	0.0289054
3.08246	0.0289054
3.09745	0.0289054
3.11244	0.0289054
3.12744	0.0289054
3.14243	0.0289054
3.15742	0.0289054
3.17241	0.0289054
3.18741	0.0289054
3.2024	0.0289054
3.21739	0.0289054
3.23238	0.0289054
3.24737	0.0289054
3.26237	0.0289054
3.27736	0.0289054
3.29235	0.0289054
3.30734	0.0289054
3.32234	0.0289054
3.33733	0.0289054
3.35232	0.0289054
3.36731	0.0289054
3.38231	0.0289054
3.3973	0.0289054
3.41229	0.0289054
3.42729	0.0289054
3.44228	0.0289054
3.45727	0.0289054
3.47226	0.0289054
3.48726	0.0289054
3.50225	0.0289054
3.51724	0.0289054
3.53223	0.0289054
3.54723	0.0289054
3.56222	0.0289054
3.57721	0.0289054
3.5922	0.0289054
3.60719	0.0289054
3.62219	0.0289054
3.63718	0.0289054
3.65217	0.0289054
3.66716	0.0289054
3.68216	0.0289054
3.69715	0.0289054
3.71214	0.0289054
3.72713	0.0289054
3.74213	0.0289054
3.75712	0.0289054
3.77211	0.0289054
3.78711	0.0289054
3.8021	0.0289054
3.81709	0.0289054
3.83208	0.0289054
3.84708	0.0289054
3.86207	0.0289054
3.87706	0.0289054
3.89205	0.0289054
3.90705	0.0289054
3.92204	0.0289054
3.93703	0.0289054
3.95202	0.0289054
3.96701	0.0289054
3.98201	0.0289054
3.997	0.0289054
4.01199	0.0289054
4.02698	0.0289054
4.04198	0.0289054
4.05697	0.0289054
4.07196	0.0289054
4.08695	0.0289054
4.10195	0.0289054
4.11694	0.0289054
4.13193	0.0289054
4.14693	0.0289054
4.16192	0.0289054
4.17691	0.0289054
4.1919	0.0289054
4.2069	0.0289054
4.22189	0.0289054
4.23688	0.0289054
4.25187	0.0289054
4.26687	0.0289054
4.28186	0.0289054
4.29685	0.0289054
4.31184	0.0289054
4.32683	0.0289054
4.34183	0.0289054
4.35682	0.0289054
4.37181	0.0289054
4.3868	0.0289054
4.4018	0.0289054
4.41679	0.0289054
4.43178	0.0289054
4.44677	0.0289054
4.46177	0.0289054
4.47676	0.0289054
4.49175	0.0289054
4.50674	0.0289054
4.52174	0.0289054
4.53673	0.0289054
4.55172	0.0289054
4.56672	0.0289054
4.58171	0.0289054
4.5967	0.182064
4.61169	0.226966
4.62669	-0.0807406
4.64168	0.233498
4.65667	0.463969
4.67166	0.956334
4.68666	1.38967
4.70165	-0.168352
4.71664	0.646512
4.73163	0.058938
4.74662	0.350154
4.76162	-0.343391
4.77661	0.495067
4.7916	-0.347961
4.80659	0.41147
4.82159	-0.365595
4.83658	0.114294
4.85157	0.429103
4.86656	-0.359063
4.88156	0.249819
4.89655	-0.199373
4.91154	-0.603339
4.92654	0.316277
4.94153	-0.565045
4.95652	-0.488304
4.97151	0.244106
4.98651	-0.289178
5.0015	-0.471319
5.01649	0.538996
5.03148	-0.296033
5.04648	-0.519572
5.06147	0.308031
5.07646	-0.473851
5.09145	-0.630854
5.10644	0.291864
5.12144	-0.273505
5.13643	-0.551581
5.15142	0.221732
5.16641	-0.224357
5.18141	-0.673054
5.1964	0.160833
5.21139	-0.401433
5.22638	-0.730943
5.24138	0.0293069
5.25637	-0.234887
5.27136	-0.636073
5.28636	-0.0377222
5.30135	0.250066
5.31634	-0.390902
5.33133	-0.122385
5.34633	0.112008
5.36132	-0.332042
5.37631	-0.326081
5.3913	0.0185291
5.4063	-0.259052
5.42129	-0.533206
5.43628	-0.254235
5.45127	0.0162439
5.46626	-0.370165
5.48126	-0.376697
5.49625	-0.109075
5.51124	-0.0315149
5.52623	-0.527817
5.54123	-0.189738
5.55622	0.200346
5.57121	-0.37384
5.5862	-0.599417
5.6012	-0.965923
5.61619	-0.277427
5.63118	-0.774301
5.64618	0.0711827
5.66117	-0.430092
5.67616	-0.556151
5.69115	0.155444
5.70615	-0.42952
5.72114	0.13185
5.73613	0.351219
5.75112	-0.42495
5.76612	0.200099
5.78111	-0.153081
5.7961	-0.41499
5.81109	0.173649
5.82608	-0.288606
5.84108	-0.371802
5.85607	0.198632
5.87106	-0.36788
5.88605	-0.624076
5.90105	0.126461
5.91604	-0.355388
5.93103	-0.620972
5.94602	0.103439
5.96102	-0.358492
5.97601	-0.695675
5.991	0.147198
6.006	-0.381267
6.02099	-0.72841
6.03598	-0.921993
6.05097	-1.27772
6.06597	-0.0348656
6.08096	-0.646527
6.09595	-0.0828714
6.11094	0.183284
6.12594	-0.361271
6.14093	-0.0172321
6.15592	0.245001
6.17091	-0.390254
6.1859	0.101478
6.2009	0.365425
6.21589	-0.387722
6.23088	-0.23146
6.24587	0.0509396
6.26087	-0.35931
6.27586	-0.599417
6.29085	-0.126384
6.30584	-0.23464
6.32084	-0.23464
6.33583	-0.371555
6.35082	0.0653923
6.36581	-0.357349
6.38081	-0.603339
6.3958	-0.234887
6.41079	-0.389111
6.42578	-0.662447
6.44078	-0.378086
6.45577	-0.145407
6.47076	-0.629218
6.48575	-0.454179
6.50075	-0.227785
6.51574	-0.359063
6.53073	-0.63036
6.54572	-0.326406
6.56072	-0.0102065
6.57571	-0.479811
6.5907	-0.741226
6.6057	-0.43809
6.62069	-0.362815
6.63568	-0.293501
6.65067	-0.624724
6.66567	-0.451153
6.68066	-0.423313
6.69565	-0.398901
6.71064	-0.342078
6.72564	-1.09924
6.74063	-1.41505
6.75562	-0.598351
6.77061	-0.616232
6.78561	-0.926888
6.8006	-0.296929
6.81559	0.0272687
6.83058	-0.584887
6.84558	-0.238315
6.86057	0.0540432
6.87556	-0.647345
6.89055	-0.332366
6.90555	0.0151012
6.92054	-0.917098
6.93553	-1.42313
6.95052	-0.957584
6.96551	-0.885089
6.98051	-1.12308
6.9955	-0.599417
7.01049	-1.52738
7.02548	-0.6391
7.04048	-0.663265
7.05547	-0.878234
7.07046	-0.178559
7.08545	-0.493121
7.10045	-0.175208
7.11544	0.21063
7.13043	-0.382333
7.14542	-0.490018
7.16042	0.106048
7.17541	-0.418418
7.1904	-0.586029
7.20539	0.0413045
7.22039	-0.0805862
7.23538	-0.614194
7.25037	-0.207619
7.26536	0.249819
7.28036	-0.18174
7.29535	-0.440869
7.31034	0.00571314
7.32534	-0.026126
7.34033	-0.359388
7.35532	-0.40429
7.37031	-0.14377
7.38531	0.0988682
7.4003	-0.287541
7.41529	-0.441518
7.43028	-0.308278
7.44528	-0.18753
7.46027	-0.166222
7.47526	-0.137239
7.49025	-0.37645
7.50525	-0.312524
7.52024	-0.269336
7.53523	-0.262233
7.55022	-0.254559
7.56522	-0.219045
7.58021	-0.204839
7.5952	-0.155119
7.61019	-0.140914
7.62519	-0.133811
7.64018	-0.126708
7.65517	-0.126708
7.67016	-0.119605
7.68515	-0.119605
7.70015	-0.11993
7.71514	-0.117969
7.73013	-0.117969
7.74512	-0.117969
7.76012	-0.111437
7.77511	-0.111437
7.7901	-0.11258
7.80509	-0.113151
7.82009	-0.113151
7.83508	-0.113151
7.85007	-0.113151
7.86506	-0.113151
7.88006	-0.113151
7.89505	-0.113151
7.91004	-1.05198
7.92503	-0.420456
7.94003	-0.0772355
7.95502	-0.76221
7.97001	-0.0751973
7.985	0.281658
8	-0.46014
8.01499	0.0879206
8.02998	0.314887
8.04498	-0.268688
8.05997	-0.524389
8.07496	-0.02066
8.08995	0.0983741
8.10494	-0.559903
8.11994	-0.290567
8.13493	0.110295
8.14992	-0.294567
8.16491	-0.592314
8.17991	-0.193413
8.1949	0.186712
8.20989	-0.218149
8.22489	-0.336118
8.23988	-0.215941
8.25487	-0.188101
8.26986	-0.15969
8.28486	-0.10997
8.29985	-0.081559
8.31484	-0.081559
8.32983	-0.081559
8.34482	-0.0673533
8.35982	-0.0673533
8.37481	-0.0673533
8.3898	-0.0460448
8.4048	-0.0460448
8.41979	-0.0460448
8.43478	-0.0460448
8.44977	-0.0460448
8.46476	-0.0460448
8.47976	-0.0460448
8.49475	-0.0460448
8.50974	-0.0460448
8.52473	-0.0460448
8.53973	-0.0460448
8.55472	-0.0460448
8.56971	-0.0460448
8.5847	-0.0460448
8.5997	-0.0460448
8.61469	-0.0460448
8.62968	-0.0460448
8.64467	-0.0460448
8.65967	-0.0460448
8.67466	-0.0460448
8.68965	-0.0460448
8.70465	-0.0460448
8.71964	-0.0460448
8.73463	-0.0460448
8.74962	-0.0460448
8.76461	-0.0460448
8.77961	-0.0460448
8.7946	-0.0460448
8.80959	-0.0460448
8.82458	-0.0460448
8.83958	-0.0460448
8.85457	-0.0460448
8.86956	-0.0460448
8.88456	-0.0460448
8.89955	-0.0460448
8.91454	-0.0460448
8.92953	-0.0460448
8.94453	-0.0460448
8.95952	-0.0460448
8.97451	-0.0460448
8.9895	-0.0460448
9.00449	-0.0460448
9.01949	-0.0460448
9.03448	-0.0460448
9.04947	-0.0460448
9.06447	-0.0460448
9.07946	-0.0460448
9.09445	-0.0460448
9.10944	-0.0460448
9.12444	-0.0460448
9.13943	-0.0460448
9.15442	-0.0460448
9.16941	-0.0460448
9.1844	-0.0460448
9.1994	-0.0460448
9.21439	-0.0460448
9.22938	-0.0460448
9.24437	-0.0460448
9.25937	-0.0460448
9.27436	0.201242
9.28935	-0.802712
9.30434	0.272594
9.31934	-0.591418
9.33433	0.180257
9.34932	-0.22746
9.36432	-0.382333
9.37931	0.130785
9.3943	-0.29171
9.40929	0.0495499
9.42428	-0.0669518
9.43928	-0.423236
9.45427	0.140744
9.46926	-0.407316
9.48425	-0.0521749
9.49925	0.277659
9.51424	-0.371555
9.52923	0.142134
9.54423	0.245897
9.55922	-0.420132
9.57421	0.260349
9.5892	-0.260442
9.60419	0.0751047
9.61919	0.431389
9.63418	-0.234887
9.64917	0.367787
9.66416	-0.226642
9.67916	-0.495978
9.69415	0.395303
9.70914	-0.407888
9.72414	0.0503683
9.73913	0.103192
9.75412	-0.456789
9.76911	0.259778
9.78411	-0.386332
9.7991	-0.124917
9.81409	0.351544
9.82908	-0.390578
9.84407	0.102373
9.85907	0.267452
9.87406	-0.441688
9.88905	0.177401
9.90404	-0.226642
9.91904	-0.0183747
9.93403	0.281087
9.94902	-0.376372
9.96401	0.772556
9.97901	-0.692495
9.994	0.482652
10.009	-0.434508
10.024	-0.288529
10.039	-0.493121
10.054	0.112333
10.069	-0.24934
10.0839	-0.151043
10.099	0.196424
10.1139	-0.458179
10.1289	-0.17578
10.1439	0.0799222
10.1589	-0.390007
10.1739	-0.0638482
10.1889	0.149236
10.2039	-0.35335
10.2189	-0.155042
10.2339	0.106048
10.2489	-0.405927
10.2639	-0.621297
10.2789	-0.165002
10.2939	0.0665349
10.3088	-0.338326
10.3238	-0.501691
10.3388	-0.356531
10.3538	-0.258805
10.3688	-0.203697
10.3838	-0.175285
10.3988	-0.239782
10.4138	-0.219045
10.4288	-0.197737
10.4438	-0.176999
10.4588	-0.155691
10.4738	-0.120177
10.4887	-0.105971
10.5037	-0.0917654
10.5187	-0.0917654
10.5337	-0.0846626
10.5487	-0.0846626
10.5637	-0.0846626
10.5787	-0.0846626
10.5937	-0.0846626
10.6087	-0.0846626
10.6237	-0.0846626
10.6387	-0.0775598
10.6537	-0.0775598
10.6687	-0.0775598
10.6837	-0.0775598
10.6987	-0.0775598
10.7136	-0.0775598
10.7286	-0.0775598
10.7436	-0.0775598
10.7586	-0.0775598
10.7736	-0.0775598
10.7886	-0.0775598
10.8036	-0.0775598
10.8186	-0.0775598
10.8336	-0.0775598
10.8486	-0.0775598
10.8636	-0.0775598
10.8786	-0.0775598
10.8935	-0.0775598
10.9085	-0.0775598
10.9235	-0.0775598
10.9385	-0.0775598
10.9535	-0.0775598
10.9685	-0.0775598
10.9835	-0.0775598
10.9985	-0.0775598
11.0135	-0.0775598
11.0285	-0.0775598
11.0435	-0.0775598
11.0585	-0.0775598
11.0735	-0.0775598
11.0884	-0.0775598
11.1034	-0.0775598
11.1184	-0.0775598
11.1334	-0.0775598
11.1484	-0.0775598
11.1634	-0.0775598
11.1784	-0.0775598
11.1934	-0.0775598
11.2084	-0.0775598
11.2234	-0.0775598
11.2384	-0.0775598
11.2534	-0.0775598
11.2684	-0.0775598
11.2834	-0.0775598
11.2983	-0.0775598
11.3133	-0.0775598
11.3283	-0.0775598
11.3433	-0.0775598
11.3583	-0.0775598
11.3733	-0.0775598
11.3883	-0.0775598
11.4033	-0.0775598
11.4183	-0.0775598
11.4333	-0.0775598
11.4483	-0.0775598
11.4633	-0.0775598
11.4783	-0.0775598
11.4932	-0.0775598
11.5082	-0.0775598
11.5232	-0.0775598
11.5382	-0.0775598
11.5532	-0.0775598
11.5682	-0.0775598
11.5832	-0.0775598
11.5982	-0.0775598
11.6132	-0.0775598
11.6282	-0.0775598
11.6432	-0.0775598
11.6582	-0.0775598
11.6732	-0.0775598
11.6882	-0.0775598
11.7032	-0.0775598
11.7181	-0.0775598
11.7331	-0.0775598
11.7481	-0.0775598
11.7631	-0.0775598
11.7781	-0.0775598
11.7931	-0.0775598
11.8081	-0.0704569
11.8231	-0.0704569
11.8381	-0.0704569
11.8531	-0.0704569
11.8681	-0.0704569
11.8831	-0.0704569
11.898	-0.0704569
11.913	-0.0704569
11.928	-0.0704569
11.943	-0.0704569
11.958	-0.0704569
11.973	-0.0704569
11.988	-0.0704569
12.003	-0.0704569

## Sheet: E
time	positon
-0.995917	0.0170431
-0.981104	0.0170431
-0.966083	0.0170431
-0.951021	0.0170431
-0.936104	0.0170431
-0.921188	0.0170431
-0.906125	0.0170431
-0.891083	0.0170431
-0.876187	0.0170431
-0.861104	0.0170431
-0.846229	0.0170431
-0.831146	0.0170431
-0.816208	0.0170431
-0.801187	0.0170431
-0.786312	0.0170431
-0.771292	0.0170431
-0.756271	0.0170431
-0.741313	0.0170431
-0.726354	0.0170431
-0.711396	0.0170431
-0.69625	0.0170431
-0.681375	0.0170431
-0.666333	0.0170431
-0.651417	0.0170431
-0.636396	0.0170431
-0.621521	0.0170431
-0.606417	0.0170431
-0.591396	0.0170431
-0.576479	0.0170431
-0.561542	0.0170431
-0.546521	0.0170431
-0.531521	0.0170431
-0.516583	0.0170431
-0.501583	0.0170431
-0.486583	0.0170431
-0.471542	0.0170431
-0.456542	0.0170431
-0.441625	0.0170431
-0.426646	0.0170431
-0.411708	0.0170431
-0.396625	0.0170431
-0.381667	0.0170431
-0.366667	0.0170431
-0.351687	0.0170431
-0.336771	0.0170431
-0.321729	0.0170431
-0.306771	0.0170431
-0.291813	0.0170431
-0.276854	0.0170431
-0.261771	0.0170431
-0.246792	0.0170431
-0.231792	0.0170431
-0.216896	0.0170431
-0.201896	0.0170431
-0.186875	0.0170431
-0.171875	0.0170431
-0.156854	0.0170431
-0.141958	0.0170431
-0.126896	0.0170431
-0.112	0.0170431
-0.0969792	0.0170431
-0.0820417	0.0170431
-0.0670208	0.0170431
-0.0520625	0.0170431
-0.037	0.0170431
-0.0220833	0.0170431
-0.00697917	0.0170431
0.00795833	0.0170431
0.0228125	0.0170431
0.037875	0.0170431
0.0528125	0.0170431
0.0678958	0.0170431
0.0829375	-0.10532
0.097875	0.0316369
0.112833	0.525206
0.127771	-1.94179
0.142771	-2.52615
0.157771	-1.49455
0.172771	-2.5269
0.187667	-2.27187
0.202708	-0.548576
0.217646	-0.956624
0.232708	-1.37164
0.247604	-1.31817
0.262667	0.765952
0.277646	1.04694
0.292708	0.814564
0.307646	-0.284732
0.322521	1.6627
0.337583	1.60964
0.352625	-1.71761
0.367583	-2.08381
0.382583	0.514218
0.397521	1.86259
0.412521	0.507925
0.4275	0.393998
0.442479	0.389984
0.457396	0.46462
0.472479	0.573035
0.487333	0.742241
0.502438	0.831913
0.517354	0.931824
0.532333	0.929647
0.547375	0.96887
0.562312	0.967782
0.577354	0.968326
0.592271	0.940873
0.60725	0.886614
0.622229	0.886614
0.637188	0.809257
0.652208	0.778097
0.667167	0.717408
0.682208	0.664238
0.697229	0.604094
0.712083	0.530547
0.727187	0.530547
0.742104	0.479553
0.757021	0.390426
0.772104	0.39097
0.787083	0.376479
0.802021	0.301299
0.817104	0.301299
0.832	0.25619
0.846979	0.25619
0.861937	0.232004
0.877021	0.207817
0.891938	0.151381
0.906938	0.173935
0.921896	0.173935
0.936937	0.173935
0.951917	0.143863
0.966875	0.143863
0.981917	0.143863
0.996854	0.143863
1.01181	0.143863
1.02675	0.105184
1.04175	0.0745677
1.05675	0.0439514
1.07171	0.0965775
1.08675	0.0885152
1.10177	0.0509251
1.11675	0.0509251
1.13167	0.0503808
1.14662	0.103551
1.1616	0.0439514
1.17669	0.0815414
1.1916	0.0745677
1.20658	0.0745677
1.22162	0.0364334
1.23656	0.0734791
1.25158	0.0734791
1.2665	0.0664034
1.28156	0.0927674
1.29656	0.0927674
1.31144	0.0927674
1.32648	0.0927674
1.34146	0.0927674
1.3565	0.0927674
1.37142	0.0433051
1.38635	0.0847051
1.4015	0.0847051
1.41637	0.0847051
1.43138	0.0847051
1.44633	0.0847051
1.46135	0.0847051
1.47631	0.0847051
1.49123	0.0847051
1.50637	0.0847051
1.52129	0.0740234
1.53631	0.0610625
1.55121	0.0610625
1.56627	0.0610625
1.58121	0.0610625
1.59619	0.0610625
1.6111	0.0610625
1.6261	0.0610625
1.64117	0.0610625
1.65619	0.0610625
1.67119	0.0610625
1.6861	0.0610625
1.70113	0.0610625
1.71615	0.0610625
1.73106	0.0610625
1.74604	0.0610625
1.76098	0.0610625
1.77606	0.0610625
1.7909	0.0610625
1.806	0.0610625
1.821	0.0610625
1.83596	0.0610625
1.85092	0.0610625
1.86598	0.0610625
1.88088	0.0610625
1.89585	0.0610625
1.91092	0.0610625
1.92579	0.0610625
1.94092	0.0240168
1.95585	0.0240168
1.97083	0.0240168
1.98585	0.0175874
2.0009	0.0175874
2.01573	0.0175874
2.03067	0.0175874
2.04565	0.0175874
2.06075	0.0175874
2.07571	0.0175874
2.09063	0.0175874
2.10562	0.0175874
2.1206	0.0175874
2.13569	0.0175874
2.15058	0.0175874
2.16563	0.0175874
2.18052	0.0175874
2.19548	0.0175874
2.2105	0.0175874
2.22548	0.0175874
2.24052	0.0175874
2.25544	0.0175874
2.27044	0.0175874
2.28546	0.0175874
2.30037	0.0175874
2.31544	0.0175874
2.33046	0.0320791
2.34535	0.0320791
2.36033	0.0320791
2.3754	0.0320791
2.39037	0.0320791
2.40533	0.0546331
2.42033	0.0546331
2.43529	0.0546331
2.45023	0.0546331
2.46535	0.0546331
2.48027	0.0546331
2.49525	0.0546331
2.51021	0.0546331
2.52515	0.0540888
2.54021	0.0540888
2.55519	0.0540888
2.57023	0.0385085
2.58515	0.0385085
2.60019	0.0385085
2.61515	0.0385085
2.63002	0.0385085
2.645	0.0385085
2.66002	0.0385085
2.67513	0.0385085
2.69006	0.0385085
2.70496	0.0385085
2.71998	0.0385085
2.7349	0.0385085
2.75	0.0385085
2.76487	0.0385085
2.77987	0.0385085
2.79483	0.0175874
2.80996	0.0175874
2.82487	0.0175874
2.83977	0.0181317
2.85485	0.0181317
2.86985	0.0181317
2.88483	0.0654169
2.89977	0.0100694
2.91481	0.0100694
2.92969	0.0100694
2.94469	0.0100694
2.95971	0.0100694
2.97479	0.0100694
2.98977	0.0100694
3.00469	0.0100694
3.01962	0.0100694
3.03465	0.0100694
3.04954	0.0100694
3.06463	0.0100694
3.07967	0.0100694
3.09456	0.0100694
3.1095	0.0100694
3.12448	0.0100694
3.1395	0.0100694
3.15452	0.000918489
3.16944	0.0454822
3.18444	0.0454822
3.19954	0.0454822
3.21448	0.0454822
3.22938	0.0454822
3.24437	0.0454822
3.2594	0.0454822
3.27442	0.0454822
3.28933	0.0454822
3.30433	0.0454822
3.31933	0.0454822
3.33437	0.0454822
3.34938	0.0454822
3.36423	0.0454822
3.37933	0.0454822
3.39423	0.0454822
3.40929	0.0454822
3.42427	0.0454822
3.43917	0.0454822
3.45423	0.0454822
3.46908	0.0304462
3.48415	0.0304462
3.49915	0.0304462
3.51408	0.0304462
3.52906	0.0304462
3.54413	0.0304462
3.55908	0.0304462
3.57408	0.0304462
3.5891	0.0304462
3.6041	0.0304462
3.61908	0.0304462
3.63402	0.0304462
3.64898	0.0304462
3.66394	0.0304462
3.67887	0.0304462
3.69398	0.0304462
3.70902	0.0304462
3.72396	0.0304462
3.73885	0.0304462
3.75398	0.0304462
3.76896	0.0304462
3.78383	0.0304462
3.79877	0.0304462
3.8139	0.0304462
3.82873	0.0304462
3.84375	0.0304462
3.85879	0.0304462
3.87379	0.0304462
3.88871	0.0304462
3.90375	0.0304462
3.91869	0.0304462
3.93373	0.0304462
3.94867	0.0304462
3.9636	0.0304462
3.9786	0.0304462
3.9936	0.0304462
4.00863	0.0304462
4.0236	0.0304462
4.03867	0.0304462
4.05363	0.0304462
4.0686	0.0304462
4.08356	0.0304462
4.09842	0.0304462
4.11348	0.0304462
4.12838	0.0304462
4.1434	0.0304462
4.15842	0.0304462
4.17346	0.0304462
4.18844	0.0471151
4.20344	0.0471151
4.21835	0.0471151
4.23337	0.0471151
4.24842	0.0471151
4.26327	0.0471151
4.27831	0.0164988
4.29331	0.0164988
4.30823	0.0164988
4.32329	0.0170431
4.33833	0.0680362
4.35323	0.0454822
4.36831	0.0454822
4.38317	0.0454822
4.39813	0.0454822
4.41319	0.0454822
4.42804	0.0454822
4.44313	0.0454822
4.45819	0.0454822
4.47315	0.0454822
4.48804	0.0379642
4.5031	0.0379642
4.51806	0.0379642
4.533	0.0379642
4.5481	0.0379642
4.56294	0.0379642
4.57792	0.0379642
4.59296	0.0379642
4.60804	0.0379642
4.62292	0.0379642
4.63785	0.0379642
4.6529	0.0379642
4.66792	0.0379642
4.68294	0.0379642
4.69779	0.0379642
4.71285	0.0379642
4.72773	0.0379642
4.74281	0.0379642
4.75788	0.0379642
4.77285	0.0379642
4.78781	0.0379642
4.80277	0.0379642
4.81769	0.0379642
4.83263	0.0379642
4.84767	0.0379642
4.86269	0.0379642
4.87775	0.0379642
4.89267	0.0379642
4.90767	0.0379642
4.9226	0.0379642
4.93758	0.0379642
4.9526	0.0379642
4.96754	0.0379642
4.98262	0.0379642
4.99754	0.0379642
5.01252	0.0379642
