# Supplementary material for: Optogenetic manipulation of Gq- and Gi/o-coupled receptor signaling in neurons and heart muscle cells
Source: eLife. 2023 Aug 17;12:e83974. doi: 10.7554/eLife.83974 (PMC10435233; doi:10.7554/eLife.83974)
Supplement: Figure 3—figure supplement 1—source data 1. [file elife-83974-fig3-figsupp1-data1.xlsx]

## Sheet: Fig3-supplement1
Line	Tg(UAS-opto-tool) or control	sample number	trial number	yes:tail was moved not counted: tail was moved before the light no: tail was not moved
SpiRh1	Tg(UAS-opto-tool)	1	1	yes
SpiRh1	Tg(UAS-opto-tool)	1	6	not counted
SpiRh1	Tg(UAS-opto-tool)	2	1	yes
SpiRh1	Tg(UAS-opto-tool)	2	6	yes
SpiRh1	Tg(UAS-opto-tool)	3	1	yes
SpiRh1	Tg(UAS-opto-tool)	3	6	not counted
SpiRh1	Tg(UAS-opto-tool)	4	1	yes
SpiRh1	Tg(UAS-opto-tool)	4	6	not counted
SpiRh1	Tg(UAS-opto-tool)	5	1	yes
SpiRh1	Tg(UAS-opto-tool)	5	6	not counted
SpiRh1	Tg(UAS-opto-tool)	6	1	no
SpiRh1	Tg(UAS-opto-tool)	6	6	yes
SpiRh1	Tg(UAS-opto-tool)	7	1	yes
SpiRh1	Tg(UAS-opto-tool)	7	6	yes
SpiRh1	Tg(UAS-opto-tool)	8	1	yes
SpiRh1	Tg(UAS-opto-tool)	8	6	yes
SpiRh1	Tg(UAS-opto-tool)	9	1	yes
SpiRh1	Tg(UAS-opto-tool)	9	6	yes
SpiRh1	Tg(UAS-opto-tool)	10	1	yes
SpiRh1	Tg(UAS-opto-tool)	10	6	yes
SpiRh1	Tg(UAS-opto-tool)	11	1	no
SpiRh1	Tg(UAS-opto-tool)	11	6	yes
SpiRh1	Tg(UAS-opto-tool)	12	1	yes
SpiRh1	Tg(UAS-opto-tool)	12	6	no
SpiRh1	control	1	1	yes
SpiRh1	control	1	6	no
SpiRh1	control	2	1	no
SpiRh1	control	2	6	no
SpiRh1	control	3	1	no
SpiRh1	control	3	6	yes
SpiRh1	control	4	1	no
SpiRh1	control	4	6	no
SpiRh1	control	5	1	no
SpiRh1	control	5	6	no
SpiRh1	control	6	1	no
SpiRh1	control	6	6	yes
SpiRh1	control	7	1	no
SpiRh1	control	7	6	no
SpiRh1	control	8	1	no
SpiRh1	control	8	6	no
SpiRh1[S186F]	Tg(UAS-opto-tool)	1	1	yes
SpiRh1[S186F]	Tg(UAS-opto-tool)	1	6	not counted
SpiRh1[S186F]	Tg(UAS-opto-tool)	2	1	no
SpiRh1[S186F]	Tg(UAS-opto-tool)	2	6	yes
SpiRh1[S186F]	Tg(UAS-opto-tool)	3	1	yes
SpiRh1[S186F]	Tg(UAS-opto-tool)	3	6	no
SpiRh1[S186F]	Tg(UAS-opto-tool)	4	1	no
SpiRh1[S186F]	Tg(UAS-opto-tool)	4	6	yes
SpiRh1[S186F]	Tg(UAS-opto-tool)	5	1	yes
SpiRh1[S186F]	Tg(UAS-opto-tool)	5	6	not counted
SpiRh1[S186F]	Tg(UAS-opto-tool)	6	1	yes
SpiRh1[S186F]	Tg(UAS-opto-tool)	6	6	yes
SpiRh1[S186F]	Tg(UAS-opto-tool)	7	1	yes
SpiRh1[S186F]	Tg(UAS-opto-tool)	7	6	yes
SpiRh1[S186F]	Tg(UAS-opto-tool)	8	1	not counted
SpiRh1[S186F]	Tg(UAS-opto-tool)	8	6	not counted
SpiRh1[S186F]	Tg(UAS-opto-tool)	9	1	yes
SpiRh1[S186F]	Tg(UAS-opto-tool)	9	6	yes
SpiRh1[S186F]	Tg(UAS-opto-tool)	10	1	yes
SpiRh1[S186F]	Tg(UAS-opto-tool)	10	6	yes
SpiRh1[S186F]	Tg(UAS-opto-tool)	11	1	yes
SpiRh1[S186F]	Tg(UAS-opto-tool)	11	6	yes
SpiRh1[S186F]	Tg(UAS-opto-tool)	12	1	yes
SpiRh1[S186F]	Tg(UAS-opto-tool)	12	6	△
SpiRh1[S186F]	control	1	1	no
SpiRh1[S186F]	control	1	6	no
SpiRh1[S186F]	control	2	1	no
SpiRh1[S186F]	control	2	6	no
SpiRh1[S186F]	control	3	1	no
SpiRh1[S186F]	control	3	6	yes
SpiRh1[S186F]	control	4	1	no
SpiRh1[S186F]	control	4	6	yes
SpiRh1[S186F]	control	5	1	no
SpiRh1[S186F]	control	5	6	yes
SpiRh1[S186F]	control	6	1	no
SpiRh1[S186F]	control	6	6	no
SpiRh1[S186F]	control	7	1	no
SpiRh1[S186F]	control	7	6	no
SpiRh1[S186F]	control	8	1	no
SpiRh1[S186F]	control	8	6	yes
ChRWR	Tg(UAS-opto-tool)	1	1	no
ChRWR	Tg(UAS-opto-tool)	1	6	no
ChRWR	Tg(UAS-opto-tool)	2	1	yes
ChRWR	Tg(UAS-opto-tool)	2	6	yes
ChRWR	Tg(UAS-opto-tool)	3	1	yes
ChRWR	Tg(UAS-opto-tool)	3	6	not counted
ChRWR	Tg(UAS-opto-tool)	4	1	yes
ChRWR	Tg(UAS-opto-tool)	4	6	yes
ChRWR	Tg(UAS-opto-tool)	5	1	no
ChRWR	Tg(UAS-opto-tool)	5	6	no
ChRWR	Tg(UAS-opto-tool)	6	1	yes
ChRWR	Tg(UAS-opto-tool)	6	6	yes
ChRWR	Tg(UAS-opto-tool)	7	1	yes
ChRWR	Tg(UAS-opto-tool)	7	6	not counted
ChRWR	Tg(UAS-opto-tool)	8	1	no
ChRWR	Tg(UAS-opto-tool)	8	6	not counted
ChRWR	control	1	1	no
ChRWR	control	1	6	no
ChRWR	control	2	1	no
ChRWR	control	2	6	no
ChRWR	control	3	1	no
ChRWR	control	3	6	no
ChRWR	control	4	1	no
ChRWR	control	4	6	no
ChRWR	control	5	1	no
ChRWR	control	5	6	no
ChRWR	control	6	1	no
ChRWR	control	6	6	no
ChRWR	control	7	1	no
ChRWR	control	7	6	yes
ChRWR	control	8	1	no
ChRWR	control	8	6	no
