# Supplementary material for: Optogenetic manipulation of Gq- and Gi/o-coupled receptor signaling in neurons and heart muscle cells
Source: eLife. 2023 Aug 17;12:e83974. doi: 10.7554/eLife.83974 (PMC10435233; doi:10.7554/eLife.83974)
Supplement: Figure 3—figure supplement 2—source data 1. [file elife-83974-fig3-figsupp2-data1.xlsx]

## Sheet: A
Line	light intensity	sample number	trial number	latency
SpiRh1	0.4	1	1	5.1
SpiRh1	0.4	1	4	2.2
SpiRh1	0.4	1	5	2.9
SpiRh1	0.4	2	1	0.5
SpiRh1	0.4	2	2	6
SpiRh1	0.4	2	3	2.6
SpiRh1	0.4	2	4	1.8
SpiRh1	0.4	2	5	3.04
SpiRh1	0.4	2	6	1.8
SpiRh1	0.4	3	1	3.2
SpiRh1	0.4	3	4	1.6
SpiRh1	0.4	4	1	2.7
SpiRh1	0.4	4	3	4.6
SpiRh1	0.4	4	4	1.8
SpiRh1	0.4	4	5	3.7
SpiRh1	0.4	5	1	3.3
SpiRh1	0.4	5	2	6.7
SpiRh1	0.4	5	3	4.9
SpiRh1	0.4	6	2	4.3
SpiRh1	0.4	6	3	2.6
SpiRh1	0.4	6	4	1.6
SpiRh1	0.4	6	5	2.5
SpiRh1	0.4	6	6	1.2
SpiRh1	0.4	7	1	2
SpiRh1	0.4	7	2	2.2
SpiRh1	0.4	7	3	2.3
SpiRh1	0.4	7	4	0.9
SpiRh1	0.4	7	5	1
SpiRh1	0.4	7	6	2.2
SpiRh1	0.4	8	1	4.1
SpiRh1	0.4	8	2	4.5
SpiRh1	0.4	8	3	5.6
SpiRh1	0.4	8	4	6.1
SpiRh1	0.4	8	5	6.8
SpiRh1	0.4	8	6	2.7
SpiRh1	0.4	9	1	2.4
SpiRh1	0.4	9	2	3.1
SpiRh1	0.4	9	3	2.4
SpiRh1	0.4	9	4	2.3
SpiRh1	0.4	9	5	2.38
SpiRh1	0.4	9	6	2.12
SpiRh1	0.4	10	1	3.62
SpiRh1	0.4	10	4	7.25
SpiRh1	0.4	10	5	4.64
SpiRh1	0.4	10	6	2.63
SpiRh1	0.4	11	2	1.73
SpiRh1	0.4	11	3	2.01
SpiRh1	0.4	11	4	6.7
SpiRh1	0.4	11	5	0.72
SpiRh1	0.4	11	6	7.2
SpiRh1	0.4	12	1	1.4
SpiRh1	0.4	12	2	2.51
SpiRh1	0.4	12	3	3.21
SpiRh1[S186F]	0.4	1	1	5.91
SpiRh1[S186F]	0.4	1	2	5.77
SpiRh1[S186F]	0.4	1	3	5.28
SpiRh1[S186F]	0.4	1	4	1.92
SpiRh1[S186F]	0.4	1	5	1.52
SpiRh1[S186F]	0.4	2	3	3.14
SpiRh1[S186F]	0.4	2	4	4.83
SpiRh1[S186F]	0.4	2	5	3.17
SpiRh1[S186F]	0.4	2	6	1.89
SpiRh1[S186F]	0.4	3	1	4.52
SpiRh1[S186F]	0.4	3	2	2.72
SpiRh1[S186F]	0.4	4	2	4.02
SpiRh1[S186F]	0.4	4	3	4.32
SpiRh1[S186F]	0.4	4	4	4.98
SpiRh1[S186F]	0.4	4	5	5.03
SpiRh1[S186F]	0.4	4	6	4.7
SpiRh1[S186F]	0.4	5	1	4.71
SpiRh1[S186F]	0.4	5	2	2.57
SpiRh1[S186F]	0.4	5	3	3.2
SpiRh1[S186F]	0.4	5	4	4.56
SpiRh1[S186F]	0.4	5	5	3.12
SpiRh1[S186F]	0.4	6	1	3.57
SpiRh1[S186F]	0.4	6	2	1.17
SpiRh1[S186F]	0.4	6	3	2.19
SpiRh1[S186F]	0.4	6	4	2.87
SpiRh1[S186F]	0.4	6	5	2.36
SpiRh1[S186F]	0.4	6	6	3.26
SpiRh1[S186F]	0.4	7	1	6.16
SpiRh1[S186F]	0.4	7	3	3.72
SpiRh1[S186F]	0.4	7	5	6.16
SpiRh1[S186F]	0.4	7	6	2.16
SpiRh1[S186F]	0.4	8	2	7.83
SpiRh1[S186F]	0.4	8	3	6.18
SpiRh1[S186F]	0.4	8	4	3.3
SpiRh1[S186F]	0.4	9	1	4.1
SpiRh1[S186F]	0.4	9	2	5.7
SpiRh1[S186F]	0.4	9	3	5.2
SpiRh1[S186F]	0.4	9	4	4.8
SpiRh1[S186F]	0.4	9	5	4.05
SpiRh1[S186F]	0.4	9	6	4.44
SpiRh1[S186F]	0.4	10	1	2.98
SpiRh1[S186F]	0.4	10	2	3.8
SpiRh1[S186F]	0.4	10	3	7.6
SpiRh1[S186F]	0.4	10	4	4.64
SpiRh1[S186F]	0.4	10	5	6.13
SpiRh1[S186F]	0.4	10	6	4.1
SpiRh1[S186F]	0.4	11	1	3.87
SpiRh1[S186F]	0.4	11	2	2.76
SpiRh1[S186F]	0.4	11	3	3.7
SpiRh1[S186F]	0.4	11	4	4.18
SpiRh1[S186F]	0.4	11	5	2.987
SpiRh1[S186F]	0.4	11	6	4.1
SpiRh1[S186F]	0.4	12	1	4.8
SpiRh1[S186F]	0.4	12	2	3.7
SpiRh1[S186F]	0.4	12	3	2.76
SpiRh1[S186F]	0.4	12	4	5.34
ChRWR	0.4	1	2	0.065
ChRWR	0.4	1	5	0.005
ChRWR	0.4	2	1	0.02
ChRWR	0.4	2	6	0.05
ChRWR	0.4	3	1	0.08
ChRWR	0.4	3	3	0
ChRWR	0.4	3	4	0.035
ChRWR	0.4	3	5	0.02
ChRWR	0.4	4	1	0.217
ChRWR	0.4	4	3	0.067
ChRWR	0.4	4	4	0.022
ChRWR	0.4	4	5	0.097
ChRWR	0.4	4	6	0.038
ChRWR	0.4	5	2	0.12
ChRWR	0.4	5	3	0.08
ChRWR	0.4	5	4	0.05
ChRWR	0.4	5	5	0.098
ChRWR	0.4	6	1	0.083
ChRWR	0.4	6	2	0.068
ChRWR	0.4	6	4	0.053
ChRWR	0.4	6	5	0.083
ChRWR	0.4	6	6	0.098
ChRWR	0.4	7	1	0.022
ChRWR	0.4	7	2	0.053
ChRWR	0.4	7	3	0.09
ChRWR	0.4	7	4	0.068
ChRWR	0.4	7	5	0.039
ChRWR	0.4	8	4	0.06
ChRWR	0.4	8	5	0.007
SpiRh1	0.1	1	1	2.76
SpiRh1	0.1	1	2	4.89
SpiRh1	0.1	1	4	5.32
SpiRh1	0.1	1	5	4.23
SpiRh1	0.1	2	1	0.23
SpiRh1	0.1	2	3	0.2
SpiRh1	0.1	2	6	2.67
SpiRh1	0.1	3	1	3.48
SpiRh1	0.1	3	3	1.7
SpiRh1	0.1	3	4	2.8
SpiRh1	0.1	3	5	3.55
SpiRh1	0.1	4	1	4.03
SpiRh1	0.1	4	3	0.47
SpiRh1	0.1	4	4	1.76
SpiRh1	0.1	4	5	0.86
SpiRh1	0.1	4	6	4.47
SpiRh1	0.2	1	1	5.98
SpiRh1	0.2	1	2	1
SpiRh1	0.2	1	3	5.14
SpiRh1	0.2	1	4	5.78
SpiRh1	0.2	1	6	5.3
SpiRh1	0.2	2	1	4.1
SpiRh1	0.2	2	2	3.9
SpiRh1	0.2	2	5	1.26
SpiRh1	0.2	2	6	3.82
SpiRh1	0.2	3	1	2.82
SpiRh1	0.2	3	2	2.72
SpiRh1	0.2	3	3	2.4
SpiRh1	0.2	3	4	1.1
SpiRh1	0.2	3	6	3.1
SpiRh1	0.2	4	1	2.4
SpiRh1	0.2	4	2	3.1
SpiRh1	0.2	4	3	2.4
SpiRh1	0.2	4	4	2.3
SpiRh1	0.2	4	5	2.38
SpiRh1	0.2	4	6	2.12
SpiRh1[S186F]	0.1	1	1	3.07
SpiRh1[S186F]	0.1	1	2	5.08
SpiRh1[S186F]	0.1	1	3	3.67
SpiRh1[S186F]	0.1	1	4	4.39
SpiRh1[S186F]	0.1	2	5	5.47
SpiRh1[S186F]	0.1	2	6	5.52
SpiRh1[S186F]	0.1	3	1	4.68
SpiRh1[S186F]	0.1	3	2	5.85
SpiRh1[S186F]	0.1	3	4	5.7
SpiRh1[S186F]	0.1	3	6	3.58
SpiRh1[S186F]	0.1	4	1	0.24
SpiRh1[S186F]	0.1	4	4	5.38
SpiRh1[S186F]	0.1	4	6	3.3
SpiRh1[S186F]	0.2	1	1	3.33
SpiRh1[S186F]	0.2	1	2	4.22
SpiRh1[S186F]	0.2	1	3	5.3
SpiRh1[S186F]	0.2	1	4	3
SpiRh1[S186F]	0.2	1	5	0.5
SpiRh1[S186F]	0.2	1	6	2.81
SpiRh1[S186F]	0.2	2	1	1.67
SpiRh1[S186F]	0.2	2	2	2.82
SpiRh1[S186F]	0.2	2	3	2.97
SpiRh1[S186F]	0.2	2	4	3.33
SpiRh1[S186F]	0.2	2	5	3.26
SpiRh1[S186F]	0.2	2	6	3.18
SpiRh1[S186F]	0.2	3	1	1.56
SpiRh1[S186F]	0.2	3	2	2.3
SpiRh1[S186F]	0.2	3	3	6.7
SpiRh1[S186F]	0.2	3	5	7.65
SpiRh1[S186F]	0.2	4	1	3.12
SpiRh1[S186F]	0.2	4	2	5.8
SpiRh1[S186F]	0.2	4	3	0.5
SpiRh1[S186F]	0.2	4	6	7.33
ChRWR	0.1	1	4	0.66
ChRWR	0.1	4	6	2.5
ChRWR	0.2	1	3	0.87
ChRWR	0.2	4	2	0.84
ChRWR	0.2	4	3	4.5

## Sheet: B
Line	light intensity	sample number	trial number	duration
SpiRh1	0.1	1	1	15.54
SpiRh1	0.1	1	2	0.3
SpiRh1	0.1	1	4	13.13
SpiRh1	0.1	1	5	4.28
SpiRh1	0.1	2	1	3.87
SpiRh1	0.1	2	3	4.3
SpiRh1	0.1	2	6	3.61
SpiRh1	0.1	3	1	1.98
SpiRh1	0.1	3	3	4.58
SpiRh1	0.1	3	4	1.3
SpiRh1	0.1	3	5	0.25
SpiRh1	0.1	4	1	2.69
SpiRh1	0.1	4	3	1.17
SpiRh1	0.1	4	4	1.84
SpiRh1	0.1	4	5	1.14
SpiRh1	0.1	4	6	2.63
SpiRh1	0.2	1	1	1.82
SpiRh1	0.2	1	2	2.99
SpiRh1	0.2	1	3	2.99
SpiRh1	0.2	1	4	1.32
SpiRh1	0.2	1	6	3
SpiRh1	0.2	2	1	1.7
SpiRh1	0.2	2	2	1.4
SpiRh1	0.2	2	5	3.14
SpiRh1	0.2	2	6	2.16
SpiRh1	0.2	3	1	1.51
SpiRh1	0.2	3	2	1.68
SpiRh1	0.2	3	3	1.2
SpiRh1	0.2	3	4	1.8
SpiRh1	0.2	3	6	1.1
SpiRh1	0.2	4	1	1.8
SpiRh1	0.2	4	2	2.6
SpiRh1	0.2	4	3	4.8
SpiRh1	0.2	4	4	6.1
SpiRh1	0.2	4	5	4.03
SpiRh1	0.2	4	6	7.88
SpiRh1[S186F]	0.1	1	1	0.56
SpiRh1[S186F]	0.1	1	2	0.7
SpiRh1[S186F]	0.1	1	3	1.74
SpiRh1[S186F]	0.1	1	4	0.84
SpiRh1[S186F]	0.1	2	5	0.83
SpiRh1[S186F]	0.1	2	6	1.09
SpiRh1[S186F]	0.1	3	1	0.4
SpiRh1[S186F]	0.1	3	2	0.8
SpiRh1[S186F]	0.1	3	4	0.28
SpiRh1[S186F]	0.1	3	6	1.71
SpiRh1[S186F]	0.1	4	1	0.75
SpiRh1[S186F]	0.1	4	4	1.49
SpiRh1[S186F]	0.1	4	6	1.6
SpiRh1[S186F]	0.2	1	1	1.77
SpiRh1[S186F]	0.2	1	2	1.28
SpiRh1[S186F]	0.2	1	3	0.4
SpiRh1[S186F]	0.2	1	4	0.62
SpiRh1[S186F]	0.2	1	5	0.5
SpiRh1[S186F]	0.2	1	6	0.39
SpiRh1[S186F]	0.2	2	1	0.88
SpiRh1[S186F]	0.2	2	2	0.51
SpiRh1[S186F]	0.2	2	3	0.81
SpiRh1[S186F]	0.2	2	4	1.02
SpiRh1[S186F]	0.2	2	5	1.14
SpiRh1[S186F]	0.2	2	6	10.12
SpiRh1[S186F]	0.2	3	1	1.7
SpiRh1[S186F]	0.2	3	2	0.67
SpiRh1[S186F]	0.2	3	3	1.3
SpiRh1[S186F]	0.2	3	5	0.95
SpiRh1[S186F]	0.2	4	1	0.78
SpiRh1[S186F]	0.2	4	2	1.9
SpiRh1[S186F]	0.2	4	3	2.1
SpiRh1[S186F]	0.2	4	6	1.17
ChRWR	0.1	1	4	0.99
ChRWR	0.1	4	6	1.7
ChRWR	0.2	1	3	0.53
ChRWR	0.2	4	2	1.26
ChRWR	0.2	4	3	0.61
SpiRh1	0.4	1	1	3.73
SpiRh1	0.4	1	4	5.612
SpiRh1	0.4	1	5	0.7
SpiRh1	0.4	2	1	6.5
SpiRh1	0.4	2	2	2
SpiRh1	0.4	2	3	5.6
SpiRh1	0.4	2	4	1.4
SpiRh1	0.4	2	5	4.06
SpiRh1	0.4	2	6	1.307
SpiRh1	0.4	3	1	7
SpiRh1	0.4	3	4	13.389
SpiRh1	0.4	4	1	0.8
SpiRh1	0.4	4	3	0.59
SpiRh1	0.4	4	4	2.955
SpiRh1	0.4	4	5	5.131
SpiRh1	0.4	5	1	0.8
SpiRh1	0.4	5	2	3
SpiRh1	0.4	5	3	0.979
SpiRh1	0.4	6	2	3.8
SpiRh1	0.4	6	3	5.646
SpiRh1	0.4	6	4	4.444
SpiRh1	0.4	6	5	5.192
SpiRh1	0.4	6	6	1.7
SpiRh1	0.4	7	1	4.838
SpiRh1	0.4	7	2	6.196
SpiRh1	0.4	7	3	7.2
SpiRh1	0.4	7	4	5.324
SpiRh1	0.4	7	5	5.194
SpiRh1	0.4	7	6	4.818
SpiRh1	0.4	8	1	1
SpiRh1	0.4	8	2	3.8
SpiRh1	0.4	8	3	3.8
SpiRh1	0.4	8	4	2.5
SpiRh1	0.4	8	5	0.9
SpiRh1	0.4	8	6	1
SpiRh1	0.4	9	1	1.8
SpiRh1	0.4	9	2	2.6
SpiRh1	0.4	9	3	4.8
SpiRh1	0.4	9	4	6.1
SpiRh1	0.4	9	5	4.03
SpiRh1	0.4	9	6	7.88
SpiRh1	0.4	10	1	1.03
SpiRh1	0.4	10	4	0.17
SpiRh1	0.4	10	5	1.35
SpiRh1	0.4	10	6	0.47
SpiRh1	0.4	11	2	1.27
SpiRh1	0.4	11	3	0.79
SpiRh1	0.4	11	4	3.6
SpiRh1	0.4	11	5	1.58
SpiRh1	0.4	11	6	5.1
SpiRh1	0.4	12	1	8.7
SpiRh1	0.4	12	2	1.59
SpiRh1	0.4	12	3	0.96
SpiRh1[S186F]	0.4	1	1	6.86
SpiRh1[S186F]	0.4	1	2	4.39
SpiRh1[S186F]	0.4	1	3	1.15
SpiRh1[S186F]	0.4	1	4	1.7
SpiRh1[S186F]	0.4	1	5	4.33
SpiRh1[S186F]	0.4	2	3	0.92
SpiRh1[S186F]	0.4	2	4	0.29
SpiRh1[S186F]	0.4	2	5	8.64
SpiRh1[S186F]	0.4	2	6	21.1
SpiRh1[S186F]	0.4	3	1	0.79
SpiRh1[S186F]	0.4	3	2	0.61
SpiRh1[S186F]	0.4	4	2	0.2
SpiRh1[S186F]	0.4	4	3	0.53
SpiRh1[S186F]	0.4	4	4	0.18
SpiRh1[S186F]	0.4	4	5	0.41
SpiRh1[S186F]	0.4	4	6	1.46
SpiRh1[S186F]	0.4	5	1	6.34
SpiRh1[S186F]	0.4	5	2	1.69
SpiRh1[S186F]	0.4	5	3	1.21
SpiRh1[S186F]	0.4	5	4	3.03
SpiRh1[S186F]	0.4	5	5	2.23
SpiRh1[S186F]	0.4	6	1	0.24
SpiRh1[S186F]	0.4	6	2	0.41
SpiRh1[S186F]	0.4	6	3	1.14
SpiRh1[S186F]	0.4	6	4	1.09
SpiRh1[S186F]	0.4	6	5	0.51
SpiRh1[S186F]	0.4	6	6	0.3
SpiRh1[S186F]	0.4	7	1	1.88
SpiRh1[S186F]	0.4	7	3	0.56
SpiRh1[S186F]	0.4	7	5	0.29
SpiRh1[S186F]	0.4	7	6	0.6
SpiRh1[S186F]	0.4	8	2	2.49
SpiRh1[S186F]	0.4	8	3	8.69
SpiRh1[S186F]	0.4	8	4	1.87
SpiRh1[S186F]	0.4	9	1	0.77
SpiRh1[S186F]	0.4	9	2	1.2
SpiRh1[S186F]	0.4	9	3	0.7
SpiRh1[S186F]	0.4	9	4	0.5
SpiRh1[S186F]	0.4	9	5	1.81
SpiRh1[S186F]	0.4	9	6	0.46
SpiRh1[S186F]	0.4	10	1	9.62
SpiRh1[S186F]	0.4	10	2	12.85
SpiRh1[S186F]	0.4	10	3	4.2
SpiRh1[S186F]	0.4	10	4	2.46
SpiRh1[S186F]	0.4	10	5	3.67
SpiRh1[S186F]	0.4	10	6	3.3
SpiRh1[S186F]	0.4	11	1	0.93
SpiRh1[S186F]	0.4	11	2	0.54
SpiRh1[S186F]	0.4	11	3	0.7
SpiRh1[S186F]	0.4	11	4	1.22
SpiRh1[S186F]	0.4	11	5	1.013
SpiRh1[S186F]	0.4	11	6	1.3
SpiRh1[S186F]	0.4	12	1	0.6
SpiRh1[S186F]	0.4	12	2	0.3
SpiRh1[S186F]	0.4	12	3	0.41
SpiRh1[S186F]	0.4	12	4	1.62
ChRWR	0.4	1	2	0.585
ChRWR	0.4	1	5	2.608
ChRWR	0.4	2	1	0.599
ChRWR	0.4	2	6	2.922
ChRWR	0.4	3	1	0.435
ChRWR	0.4	3	3	0.245
ChRWR	0.4	3	4	0.33
ChRWR	0.4	3	5	0.345
ChRWR	0.4	4	1	0.285
ChRWR	0.4	4	3	0.133
ChRWR	0.4	4	4	0.375
ChRWR	0.4	4	5	0.285
ChRWR	0.4	4	6	0.344
ChRWR	0.4	5	2	0.31
ChRWR	0.4	5	3	0.21
ChRWR	0.4	5	4	0.27
ChRWR	0.4	5	5	0.162
ChRWR	0.4	6	1	0.447
ChRWR	0.4	6	2	0.612
ChRWR	0.4	6	4	0.347
ChRWR	0.4	6	5	0.447
ChRWR	0.4	6	6	0.284
ChRWR	0.4	7	1	0.12
ChRWR	0.4	7	2	0.127
ChRWR	0.4	7	3	0.09
ChRWR	0.4	7	4	0.192
ChRWR	0.4	7	5	0.088
ChRWR	0.4	8	4	0.38
ChRWR	0.4	8	5	1.033
