# Supplementary material for: Optogenetic manipulation of Gq- and Gi/o-coupled receptor signaling in neurons and heart muscle cells
Source: eLife. 2023 Aug 17;12:e83974. doi: 10.7554/eLife.83974 (PMC10435233; doi:10.7554/eLife.83974)
Supplement: Figure 3—source data 1. [file elife-83974-fig3-data1.xlsx]

## Sheet: A
Line	Tg(UAS-opto-tool) or control	sample number	trial number	yes:tail was moved not counted: tail was moved before the light no: tail was not moved
SpiRh1	Tg(UAS-opto-tool)	1	1	yes
SpiRh1	Tg(UAS-opto-tool)	1	2	not counted
SpiRh1	Tg(UAS-opto-tool)	1	3	not counted
SpiRh1	Tg(UAS-opto-tool)	1	4	yes
SpiRh1	Tg(UAS-opto-tool)	1	5	yes
SpiRh1	Tg(UAS-opto-tool)	1	6	not counted
SpiRh1	Tg(UAS-opto-tool)	2	1	yes
SpiRh1	Tg(UAS-opto-tool)	2	2	yes
SpiRh1	Tg(UAS-opto-tool)	2	3	yes
SpiRh1	Tg(UAS-opto-tool)	2	4	yes
SpiRh1	Tg(UAS-opto-tool)	2	5	yes
SpiRh1	Tg(UAS-opto-tool)	2	6	yes
SpiRh1	Tg(UAS-opto-tool)	3	1	yes
SpiRh1	Tg(UAS-opto-tool)	3	2	not counted
SpiRh1	Tg(UAS-opto-tool)	3	3	not counted
SpiRh1	Tg(UAS-opto-tool)	3	4	yes
SpiRh1	Tg(UAS-opto-tool)	3	5	no
SpiRh1	Tg(UAS-opto-tool)	3	6	not counted
SpiRh1	Tg(UAS-opto-tool)	4	1	yes
SpiRh1	Tg(UAS-opto-tool)	4	2	no
SpiRh1	Tg(UAS-opto-tool)	4	3	yes
SpiRh1	Tg(UAS-opto-tool)	4	4	yes
SpiRh1	Tg(UAS-opto-tool)	4	5	yes
SpiRh1	Tg(UAS-opto-tool)	4	6	not counted
SpiRh1	Tg(UAS-opto-tool)	5	1	yes
SpiRh1	Tg(UAS-opto-tool)	5	2	yes
SpiRh1	Tg(UAS-opto-tool)	5	3	yes
SpiRh1	Tg(UAS-opto-tool)	5	4	not counted
SpiRh1	Tg(UAS-opto-tool)	5	5	not counted
SpiRh1	Tg(UAS-opto-tool)	5	6	not counted
SpiRh1	Tg(UAS-opto-tool)	6	1	no
SpiRh1	Tg(UAS-opto-tool)	6	2	yes
SpiRh1	Tg(UAS-opto-tool)	6	3	yes
SpiRh1	Tg(UAS-opto-tool)	6	4	yes
SpiRh1	Tg(UAS-opto-tool)	6	5	yes
SpiRh1	Tg(UAS-opto-tool)	6	6	yes
SpiRh1	Tg(UAS-opto-tool)	7	1	yes
SpiRh1	Tg(UAS-opto-tool)	7	2	yes
SpiRh1	Tg(UAS-opto-tool)	7	3	yes
SpiRh1	Tg(UAS-opto-tool)	7	4	yes
SpiRh1	Tg(UAS-opto-tool)	7	5	yes
SpiRh1	Tg(UAS-opto-tool)	7	6	yes
SpiRh1	Tg(UAS-opto-tool)	8	1	yes
SpiRh1	Tg(UAS-opto-tool)	8	2	yes
SpiRh1	Tg(UAS-opto-tool)	8	3	yes
SpiRh1	Tg(UAS-opto-tool)	8	4	yes
SpiRh1	Tg(UAS-opto-tool)	8	5	yes
SpiRh1	Tg(UAS-opto-tool)	8	6	yes
SpiRh1	Tg(UAS-opto-tool)	9	1	yes
SpiRh1	Tg(UAS-opto-tool)	9	2	yes
SpiRh1	Tg(UAS-opto-tool)	9	3	yes
SpiRh1	Tg(UAS-opto-tool)	9	4	yes
SpiRh1	Tg(UAS-opto-tool)	9	5	yes
SpiRh1	Tg(UAS-opto-tool)	9	6	yes
SpiRh1	Tg(UAS-opto-tool)	10	1	yes
SpiRh1	Tg(UAS-opto-tool)	10	2	no
SpiRh1	Tg(UAS-opto-tool)	10	3	not counted
SpiRh1	Tg(UAS-opto-tool)	10	4	yes
SpiRh1	Tg(UAS-opto-tool)	10	5	yes
SpiRh1	Tg(UAS-opto-tool)	10	6	yes
SpiRh1	Tg(UAS-opto-tool)	11	1	no
SpiRh1	Tg(UAS-opto-tool)	11	2	yes
SpiRh1	Tg(UAS-opto-tool)	11	3	yes
SpiRh1	Tg(UAS-opto-tool)	11	4	yes
SpiRh1	Tg(UAS-opto-tool)	11	5	yes
SpiRh1	Tg(UAS-opto-tool)	11	6	yes
SpiRh1	Tg(UAS-opto-tool)	12	1	yes
SpiRh1	Tg(UAS-opto-tool)	12	2	yes
SpiRh1	Tg(UAS-opto-tool)	12	3	yes
SpiRh1	Tg(UAS-opto-tool)	12	4	not counted
SpiRh1	Tg(UAS-opto-tool)	12	5	not counted
SpiRh1	Tg(UAS-opto-tool)	12	6	no
SpiRh1	control	1	1	yes
SpiRh1	control	1	2	not counted
SpiRh1	control	1	3	not counted
SpiRh1	control	1	4	yes
SpiRh1	control	1	5	no
SpiRh1	control	1	6	no
SpiRh1	control	2	1	no
SpiRh1	control	2	2	no
SpiRh1	control	2	3	no
SpiRh1	control	2	4	no
SpiRh1	control	2	5	no
SpiRh1	control	2	6	no
SpiRh1	control	3	1	no
SpiRh1	control	3	2	no
SpiRh1	control	3	3	no
SpiRh1	control	3	4	no
SpiRh1	control	3	5	no
SpiRh1	control	3	6	yes
SpiRh1	control	4	1	no
SpiRh1	control	4	2	no
SpiRh1	control	4	3	no
SpiRh1	control	4	4	no
SpiRh1	control	4	5	no
SpiRh1	control	4	6	no
SpiRh1	control	5	1	no
SpiRh1	control	5	2	no
SpiRh1	control	5	3	no
SpiRh1	control	5	4	not counted
SpiRh1	control	5	5	yes
SpiRh1	control	5	6	no
SpiRh1	control	6	1	no
SpiRh1	control	6	2	no
SpiRh1	control	6	3	no
SpiRh1	control	6	4	no
SpiRh1	control	6	5	no
SpiRh1	control	6	6	yes
SpiRh1	control	7	1	no
SpiRh1	control	7	2	no
SpiRh1	control	7	3	no
SpiRh1	control	7	4	no
SpiRh1	control	7	5	no
SpiRh1	control	7	6	no
SpiRh1	control	8	1	no
SpiRh1	control	8	2	no
SpiRh1	control	8	3	yes
SpiRh1	control	8	4	no
SpiRh1	control	8	5	no
SpiRh1	control	8	6	no
SpiRh1[S186F]	Tg(UAS-opto-tool)	1	1	yes
SpiRh1[S186F]	Tg(UAS-opto-tool)	1	2	yes
SpiRh1[S186F]	Tg(UAS-opto-tool)	1	3	yes
SpiRh1[S186F]	Tg(UAS-opto-tool)	1	4	yes
SpiRh1[S186F]	Tg(UAS-opto-tool)	1	5	yes
SpiRh1[S186F]	Tg(UAS-opto-tool)	1	6	not counted
SpiRh1[S186F]	Tg(UAS-opto-tool)	2	1	no
SpiRh1[S186F]	Tg(UAS-opto-tool)	2	2	no
SpiRh1[S186F]	Tg(UAS-opto-tool)	2	3	yes
SpiRh1[S186F]	Tg(UAS-opto-tool)	2	4	yes
SpiRh1[S186F]	Tg(UAS-opto-tool)	2	5	yes
SpiRh1[S186F]	Tg(UAS-opto-tool)	2	6	yes
SpiRh1[S186F]	Tg(UAS-opto-tool)	3	1	yes
SpiRh1[S186F]	Tg(UAS-opto-tool)	3	2	yes
SpiRh1[S186F]	Tg(UAS-opto-tool)	3	3	not counted
SpiRh1[S186F]	Tg(UAS-opto-tool)	3	4	not counted
SpiRh1[S186F]	Tg(UAS-opto-tool)	3	5	not counted
SpiRh1[S186F]	Tg(UAS-opto-tool)	3	6	no
SpiRh1[S186F]	Tg(UAS-opto-tool)	4	1	no
SpiRh1[S186F]	Tg(UAS-opto-tool)	4	2	yes
SpiRh1[S186F]	Tg(UAS-opto-tool)	4	3	yes
SpiRh1[S186F]	Tg(UAS-opto-tool)	4	4	yes
SpiRh1[S186F]	Tg(UAS-opto-tool)	4	5	yes
SpiRh1[S186F]	Tg(UAS-opto-tool)	4	6	yes
SpiRh1[S186F]	Tg(UAS-opto-tool)	5	1	yes
SpiRh1[S186F]	Tg(UAS-opto-tool)	5	2	yes
SpiRh1[S186F]	Tg(UAS-opto-tool)	5	3	yes
SpiRh1[S186F]	Tg(UAS-opto-tool)	5	4	yes
SpiRh1[S186F]	Tg(UAS-opto-tool)	5	5	yes
SpiRh1[S186F]	Tg(UAS-opto-tool)	5	6	not counted
SpiRh1[S186F]	Tg(UAS-opto-tool)	6	1	yes
SpiRh1[S186F]	Tg(UAS-opto-tool)	6	2	yes
SpiRh1[S186F]	Tg(UAS-opto-tool)	6	3	yes
SpiRh1[S186F]	Tg(UAS-opto-tool)	6	4	yes
SpiRh1[S186F]	Tg(UAS-opto-tool)	6	5	yes
SpiRh1[S186F]	Tg(UAS-opto-tool)	6	6	yes
SpiRh1[S186F]	Tg(UAS-opto-tool)	7	1	yes
SpiRh1[S186F]	Tg(UAS-opto-tool)	7	2	not counted
SpiRh1[S186F]	Tg(UAS-opto-tool)	7	3	yes
SpiRh1[S186F]	Tg(UAS-opto-tool)	7	4	no
SpiRh1[S186F]	Tg(UAS-opto-tool)	7	5	yes
SpiRh1[S186F]	Tg(UAS-opto-tool)	7	6	yes
SpiRh1[S186F]	Tg(UAS-opto-tool)	8	1	not counted
SpiRh1[S186F]	Tg(UAS-opto-tool)	8	2	yes
SpiRh1[S186F]	Tg(UAS-opto-tool)	8	3	yes
SpiRh1[S186F]	Tg(UAS-opto-tool)	8	4	yes
SpiRh1[S186F]	Tg(UAS-opto-tool)	8	5	not counted
SpiRh1[S186F]	Tg(UAS-opto-tool)	8	6	not counted
SpiRh1[S186F]	Tg(UAS-opto-tool)	9	1	yes
SpiRh1[S186F]	Tg(UAS-opto-tool)	9	2	yes
SpiRh1[S186F]	Tg(UAS-opto-tool)	9	3	yes
SpiRh1[S186F]	Tg(UAS-opto-tool)	9	4	yes
SpiRh1[S186F]	Tg(UAS-opto-tool)	9	5	yes
SpiRh1[S186F]	Tg(UAS-opto-tool)	9	6	yes
SpiRh1[S186F]	Tg(UAS-opto-tool)	10	1	yes
SpiRh1[S186F]	Tg(UAS-opto-tool)	10	2	yes
SpiRh1[S186F]	Tg(UAS-opto-tool)	10	3	yes
SpiRh1[S186F]	Tg(UAS-opto-tool)	10	4	yes
SpiRh1[S186F]	Tg(UAS-opto-tool)	10	5	yes
SpiRh1[S186F]	Tg(UAS-opto-tool)	10	6	yes
SpiRh1[S186F]	Tg(UAS-opto-tool)	11	1	yes
SpiRh1[S186F]	Tg(UAS-opto-tool)	11	2	yes
SpiRh1[S186F]	Tg(UAS-opto-tool)	11	3	yes
SpiRh1[S186F]	Tg(UAS-opto-tool)	11	4	yes
SpiRh1[S186F]	Tg(UAS-opto-tool)	11	5	yes
SpiRh1[S186F]	Tg(UAS-opto-tool)	11	6	yes
SpiRh1[S186F]	Tg(UAS-opto-tool)	12	1	yes
SpiRh1[S186F]	Tg(UAS-opto-tool)	12	2	yes
SpiRh1[S186F]	Tg(UAS-opto-tool)	12	3	yes
SpiRh1[S186F]	Tg(UAS-opto-tool)	12	4	yes
SpiRh1[S186F]	Tg(UAS-opto-tool)	12	5	△
SpiRh1[S186F]	Tg(UAS-opto-tool)	12	6	△
SpiRh1[S186F]	control	1	1	no
SpiRh1[S186F]	control	1	2	yes
SpiRh1[S186F]	control	1	3	no
SpiRh1[S186F]	control	1	4	no
SpiRh1[S186F]	control	1	5	no
SpiRh1[S186F]	control	1	6	no
SpiRh1[S186F]	control	2	1	no
SpiRh1[S186F]	control	2	2	yes
SpiRh1[S186F]	control	2	3	no
SpiRh1[S186F]	control	2	4	yes
SpiRh1[S186F]	control	2	5	no
SpiRh1[S186F]	control	2	6	no
SpiRh1[S186F]	control	3	1	no
SpiRh1[S186F]	control	3	2	yes
SpiRh1[S186F]	control	3	3	not counted
SpiRh1[S186F]	control	3	4	yes
SpiRh1[S186F]	control	3	5	yes
SpiRh1[S186F]	control	3	6	yes
SpiRh1[S186F]	control	4	1	no
SpiRh1[S186F]	control	4	2	yes
SpiRh1[S186F]	control	4	3	yes
SpiRh1[S186F]	control	4	4	yes
SpiRh1[S186F]	control	4	5	yes
SpiRh1[S186F]	control	4	6	yes
SpiRh1[S186F]	control	5	1	no
SpiRh1[S186F]	control	5	2	no
SpiRh1[S186F]	control	5	3	no
SpiRh1[S186F]	control	5	4	no
SpiRh1[S186F]	control	5	5	yes
SpiRh1[S186F]	control	5	6	yes
SpiRh1[S186F]	control	6	1	no
SpiRh1[S186F]	control	6	2	no
SpiRh1[S186F]	control	6	3	yes
SpiRh1[S186F]	control	6	4	no
SpiRh1[S186F]	control	6	5	no
SpiRh1[S186F]	control	6	6	no
SpiRh1[S186F]	control	7	1	no
SpiRh1[S186F]	control	7	2	no
SpiRh1[S186F]	control	7	3	no
SpiRh1[S186F]	control	7	4	no
SpiRh1[S186F]	control	7	5	no
SpiRh1[S186F]	control	7	6	no
SpiRh1[S186F]	control	8	1	no
SpiRh1[S186F]	control	8	2	no
SpiRh1[S186F]	control	8	3	no
SpiRh1[S186F]	control	8	4	no
SpiRh1[S186F]	control	8	5	no
SpiRh1[S186F]	control	8	6	yes
ChRWR	Tg(UAS-opto-tool)	1	1	no
ChRWR	Tg(UAS-opto-tool)	1	2	yes
ChRWR	Tg(UAS-opto-tool)	1	3	no
ChRWR	Tg(UAS-opto-tool)	1	4	no
ChRWR	Tg(UAS-opto-tool)	1	5	yes
ChRWR	Tg(UAS-opto-tool)	1	6	no
ChRWR	Tg(UAS-opto-tool)	2	1	yes
ChRWR	Tg(UAS-opto-tool)	2	2	not counted
ChRWR	Tg(UAS-opto-tool)	2	3	no
ChRWR	Tg(UAS-opto-tool)	2	4	no
ChRWR	Tg(UAS-opto-tool)	2	5	no
ChRWR	Tg(UAS-opto-tool)	2	6	yes
ChRWR	Tg(UAS-opto-tool)	3	1	yes
ChRWR	Tg(UAS-opto-tool)	3	2	not counted
ChRWR	Tg(UAS-opto-tool)	3	3	yes
ChRWR	Tg(UAS-opto-tool)	3	4	yes
ChRWR	Tg(UAS-opto-tool)	3	5	yes
ChRWR	Tg(UAS-opto-tool)	3	6	not counted
ChRWR	Tg(UAS-opto-tool)	4	1	yes
ChRWR	Tg(UAS-opto-tool)	4	2	no
ChRWR	Tg(UAS-opto-tool)	4	3	yes
ChRWR	Tg(UAS-opto-tool)	4	4	yes
ChRWR	Tg(UAS-opto-tool)	4	5	yes
ChRWR	Tg(UAS-opto-tool)	4	6	yes
ChRWR	Tg(UAS-opto-tool)	5	1	no
ChRWR	Tg(UAS-opto-tool)	5	2	yes
ChRWR	Tg(UAS-opto-tool)	5	3	yes
ChRWR	Tg(UAS-opto-tool)	5	4	yes
ChRWR	Tg(UAS-opto-tool)	5	5	yes
ChRWR	Tg(UAS-opto-tool)	5	6	no
ChRWR	Tg(UAS-opto-tool)	6	1	yes
ChRWR	Tg(UAS-opto-tool)	6	2	yes
ChRWR	Tg(UAS-opto-tool)	6	3	not counted
ChRWR	Tg(UAS-opto-tool)	6	4	yes
ChRWR	Tg(UAS-opto-tool)	6	5	yes
ChRWR	Tg(UAS-opto-tool)	6	6	yes
ChRWR	Tg(UAS-opto-tool)	7	1	yes
ChRWR	Tg(UAS-opto-tool)	7	2	yes
ChRWR	Tg(UAS-opto-tool)	7	3	yes
ChRWR	Tg(UAS-opto-tool)	7	4	yes
ChRWR	Tg(UAS-opto-tool)	7	5	yes
ChRWR	Tg(UAS-opto-tool)	7	6	not counted
ChRWR	Tg(UAS-opto-tool)	8	1	no
ChRWR	Tg(UAS-opto-tool)	8	2	not counted
ChRWR	Tg(UAS-opto-tool)	8	3	not counted
ChRWR	Tg(UAS-opto-tool)	8	4	yes
ChRWR	Tg(UAS-opto-tool)	8	5	yes
ChRWR	Tg(UAS-opto-tool)	8	6	not counted
ChRWR	control	1	1	no
ChRWR	control	1	2	no
ChRWR	control	1	3	no
ChRWR	control	1	4	no
ChRWR	control	1	5	no
ChRWR	control	1	6	no
ChRWR	control	2	1	no
ChRWR	control	2	2	no
ChRWR	control	2	3	no
ChRWR	control	2	4	no
ChRWR	control	2	5	yes
ChRWR	control	2	6	no
ChRWR	control	3	1	no
ChRWR	control	3	2	no
ChRWR	control	3	3	no
ChRWR	control	3	4	no
ChRWR	control	3	5	no
ChRWR	control	3	6	no
ChRWR	control	4	1	no
ChRWR	control	4	2	no
ChRWR	control	4	3	no
ChRWR	control	4	4	no
ChRWR	control	4	5	no
ChRWR	control	4	6	no
ChRWR	control	5	1	no
ChRWR	control	5	2	no
ChRWR	control	5	3	no
ChRWR	control	5	4	yes
ChRWR	control	5	5	no
ChRWR	control	5	6	no
ChRWR	control	6	1	no
ChRWR	control	6	2	no
ChRWR	control	6	3	no
ChRWR	control	6	4	no
ChRWR	control	6	5	no
ChRWR	control	6	6	no
ChRWR	control	7	1	no
ChRWR	control	7	2	no
ChRWR	control	7	3	no
ChRWR	control	7	4	not counted
ChRWR	control	7	5	no
ChRWR	control	7	6	yes
ChRWR	control	8	1	no
ChRWR	control	8	2	no
ChRWR	control	8	3	no
ChRWR	control	8	4	no
ChRWR	control	8	5	yes
ChRWR	control	8	6	no

## Sheet: B
Line	sample number	trial number	latency
SpiRh1	1	1	5.1
SpiRh1	1	4	2.2
SpiRh1	1	5	2.9
SpiRh1	2	1	0.5
SpiRh1	2	2	6
SpiRh1	2	3	2.6
SpiRh1	2	4	1.8
SpiRh1	2	5	3.04
SpiRh1	2	6	1.8
SpiRh1	3	1	3.2
SpiRh1	3	4	1.6
SpiRh1	4	1	2.7
SpiRh1	4	3	4.6
SpiRh1	4	4	1.8
SpiRh1	4	5	3.7
SpiRh1	5	1	3.3
SpiRh1	5	2	6.7
SpiRh1	5	3	4.9
SpiRh1	6	2	4.3
SpiRh1	6	3	2.6
SpiRh1	6	4	1.6
SpiRh1	6	5	2.5
SpiRh1	6	6	1.2
SpiRh1	7	1	2
SpiRh1	7	2	2.2
SpiRh1	7	3	2.3
SpiRh1	7	4	0.9
SpiRh1	7	5	1
SpiRh1	7	6	2.2
SpiRh1	8	1	4.1
SpiRh1	8	2	4.5
SpiRh1	8	3	5.6
SpiRh1	8	4	6.1
SpiRh1	8	5	6.8
SpiRh1	8	6	2.7
SpiRh1	9	1	2.4
SpiRh1	9	2	3.1
SpiRh1	9	3	2.4
SpiRh1	9	4	2.3
SpiRh1	9	5	2.38
SpiRh1	9	6	2.12
SpiRh1	10	1	3.62
SpiRh1	10	4	7.25
SpiRh1	10	5	4.64
SpiRh1	10	6	2.63
SpiRh1	11	2	1.73
SpiRh1	11	3	2.01
SpiRh1	11	4	6.7
SpiRh1	11	5	0.72
SpiRh1	11	6	7.2
SpiRh1	12	1	1.4
SpiRh1	12	2	2.51
SpiRh1	12	3	3.21
SpiRh1[S186F]	1	1	5.91
SpiRh1[S186F]	1	2	5.77
SpiRh1[S186F]	1	3	5.28
SpiRh1[S186F]	1	4	1.92
SpiRh1[S186F]	1	5	1.52
SpiRh1[S186F]	2	3	3.14
SpiRh1[S186F]	2	4	4.83
SpiRh1[S186F]	2	5	3.17
SpiRh1[S186F]	2	6	1.89
SpiRh1[S186F]	3	1	4.52
SpiRh1[S186F]	3	2	2.72
SpiRh1[S186F]	4	2	4.02
SpiRh1[S186F]	4	3	4.32
SpiRh1[S186F]	4	4	4.98
SpiRh1[S186F]	4	5	5.03
SpiRh1[S186F]	4	6	4.7
SpiRh1[S186F]	5	1	4.71
SpiRh1[S186F]	5	2	2.57
SpiRh1[S186F]	5	3	3.2
SpiRh1[S186F]	5	4	4.56
SpiRh1[S186F]	5	5	3.12
SpiRh1[S186F]	6	1	3.57
SpiRh1[S186F]	6	2	1.17
SpiRh1[S186F]	6	3	2.19
SpiRh1[S186F]	6	4	2.87
SpiRh1[S186F]	6	5	2.36
SpiRh1[S186F]	6	6	3.26
SpiRh1[S186F]	7	1	6.16
SpiRh1[S186F]	7	3	3.72
SpiRh1[S186F]	7	5	6.16
SpiRh1[S186F]	7	6	2.16
SpiRh1[S186F]	8	2	7.83
SpiRh1[S186F]	8	3	6.18
SpiRh1[S186F]	8	4	3.3
SpiRh1[S186F]	9	1	4.1
SpiRh1[S186F]	9	2	5.7
SpiRh1[S186F]	9	3	5.2
SpiRh1[S186F]	9	4	4.8
SpiRh1[S186F]	9	5	4.05
SpiRh1[S186F]	9	6	4.44
SpiRh1[S186F]	10	1	2.98
SpiRh1[S186F]	10	2	3.8
SpiRh1[S186F]	10	3	7.6
SpiRh1[S186F]	10	4	4.64
SpiRh1[S186F]	10	5	6.13
SpiRh1[S186F]	10	6	4.1
SpiRh1[S186F]	11	1	3.87
SpiRh1[S186F]	11	2	2.76
SpiRh1[S186F]	11	3	3.7
SpiRh1[S186F]	11	4	4.18
SpiRh1[S186F]	11	5	2.987
SpiRh1[S186F]	11	6	4.1
SpiRh1[S186F]	12	1	4.8
SpiRh1[S186F]	12	2	3.7
SpiRh1[S186F]	12	3	2.76
SpiRh1[S186F]	12	4	5.34
ChRWR	1	2	0.065
ChRWR	1	5	0.005
ChRWR	2	1	0.02
ChRWR	2	6	0.05
ChRWR	3	1	0.08
ChRWR	3	3	0
ChRWR	3	4	0.035
ChRWR	3	5	0.02
ChRWR	4	1	0.217
ChRWR	4	3	0.067
ChRWR	4	4	0.022
ChRWR	4	5	0.097
ChRWR	4	6	0.038
ChRWR	5	2	0.12
ChRWR	5	3	0.08
ChRWR	5	4	0.05
ChRWR	5	5	0.098
ChRWR	6	1	0.083
ChRWR	6	2	0.068
ChRWR	6	4	0.053
ChRWR	6	5	0.083
ChRWR	6	6	0.098
ChRWR	7	1	0.022
ChRWR	7	2	0.053
ChRWR	7	3	0.09
ChRWR	7	4	0.068
ChRWR	7	5	0.039
ChRWR	8	4	0.06
ChRWR	8	5	0.007

## Sheet: C
Line	sample number	trial number	duration
SpiRh1	1	1	3.73
SpiRh1	1	4	5.612
SpiRh1	1	5	0.7
SpiRh1	2	1	6.5
SpiRh1	2	2	2
SpiRh1	2	3	5.6
SpiRh1	2	4	1.4
SpiRh1	2	5	4.06
SpiRh1	2	6	1.307
SpiRh1	3	1	7
SpiRh1	3	4	13.389
SpiRh1	4	1	0.8
SpiRh1	4	3	0.59
SpiRh1	4	4	2.955
SpiRh1	4	5	5.131
SpiRh1	5	1	0.8
SpiRh1	5	2	3
SpiRh1	5	3	0.979
SpiRh1	6	2	3.8
SpiRh1	6	3	5.646
SpiRh1	6	4	4.444
SpiRh1	6	5	5.192
SpiRh1	6	6	1.7
SpiRh1	7	1	4.838
SpiRh1	7	2	6.196
SpiRh1	7	3	7.2
SpiRh1	7	4	5.324
SpiRh1	7	5	5.194
SpiRh1	7	6	4.818
SpiRh1	8	1	1
SpiRh1	8	2	3.8
SpiRh1	8	3	3.8
SpiRh1	8	4	2.5
SpiRh1	8	5	0.9
SpiRh1	8	6	1
SpiRh1	9	1	1.8
SpiRh1	9	2	2.6
SpiRh1	9	3	4.8
SpiRh1	9	4	6.1
SpiRh1	9	5	4.03
SpiRh1	9	6	7.88
SpiRh1	10	1	1.03
SpiRh1	10	4	0.17
SpiRh1	10	5	1.35
SpiRh1	10	6	0.47
SpiRh1	11	2	1.27
SpiRh1	11	3	0.79
SpiRh1	11	4	3.6
SpiRh1	11	5	1.58
SpiRh1	11	6	5.1
SpiRh1	12	1	8.7
SpiRh1	12	2	1.59
SpiRh1	12	3	0.96
SpiRh1[S186F]	1	1	6.86
SpiRh1[S186F]	1	2	4.39
SpiRh1[S186F]	1	3	1.15
SpiRh1[S186F]	1	4	1.7
SpiRh1[S186F]	1	5	4.33
SpiRh1[S186F]	2	3	0.92
SpiRh1[S186F]	2	4	0.29
SpiRh1[S186F]	2	5	8.64
SpiRh1[S186F]	2	6	21.1
SpiRh1[S186F]	3	1	0.79
SpiRh1[S186F]	3	2	0.61
SpiRh1[S186F]	4	2	0.2
SpiRh1[S186F]	4	3	0.53
SpiRh1[S186F]	4	4	0.18
SpiRh1[S186F]	4	5	0.41
SpiRh1[S186F]	4	6	1.46
SpiRh1[S186F]	5	1	6.34
SpiRh1[S186F]	5	2	1.69
SpiRh1[S186F]	5	3	1.21
SpiRh1[S186F]	5	4	3.03
SpiRh1[S186F]	5	5	2.23
SpiRh1[S186F]	6	1	0.24
SpiRh1[S186F]	6	2	0.41
SpiRh1[S186F]	6	3	1.14
SpiRh1[S186F]	6	4	1.09
SpiRh1[S186F]	6	5	0.51
SpiRh1[S186F]	6	6	0.3
SpiRh1[S186F]	7	1	1.88
SpiRh1[S186F]	7	3	0.56
SpiRh1[S186F]	7	5	0.29
SpiRh1[S186F]	7	6	0.6
SpiRh1[S186F]	8	2	2.49
SpiRh1[S186F]	8	3	8.69
SpiRh1[S186F]	8	4	1.87
SpiRh1[S186F]	9	1	0.77
SpiRh1[S186F]	9	2	1.2
SpiRh1[S186F]	9	3	0.7
SpiRh1[S186F]	9	4	0.5
SpiRh1[S186F]	9	5	1.81
SpiRh1[S186F]	9	6	0.46
SpiRh1[S186F]	10	1	9.62
SpiRh1[S186F]	10	2	12.85
SpiRh1[S186F]	10	3	4.2
SpiRh1[S186F]	10	4	2.46
SpiRh1[S186F]	10	5	3.67
SpiRh1[S186F]	10	6	3.3
SpiRh1[S186F]	11	1	0.93
SpiRh1[S186F]	11	2	0.54
SpiRh1[S186F]	11	3	0.7
SpiRh1[S186F]	11	4	1.22
SpiRh1[S186F]	11	5	1.013
SpiRh1[S186F]	11	6	1.3
SpiRh1[S186F]	12	1	0.6
SpiRh1[S186F]	12	2	0.3
SpiRh1[S186F]	12	3	0.41
SpiRh1[S186F]	12	4	1.62
ChRWR	1	2	0.585
ChRWR	1	5	2.608
ChRWR	2	1	0.599
ChRWR	2	6	2.922
ChRWR	3	1	0.435
ChRWR	3	3	0.245
ChRWR	3	4	0.33
ChRWR	3	5	0.345
ChRWR	4	1	0.285
ChRWR	4	3	0.133
ChRWR	4	4	0.375
ChRWR	4	5	0.285
ChRWR	4	6	0.344
ChRWR	5	2	0.31
ChRWR	5	3	0.21
ChRWR	5	4	0.27
ChRWR	5	5	0.162
ChRWR	6	1	0.447
ChRWR	6	2	0.612
ChRWR	6	4	0.347
ChRWR	6	5	0.447
ChRWR	6	6	0.284
ChRWR	7	1	0.12
ChRWR	7	2	0.127
ChRWR	7	3	0.09
ChRWR	7	4	0.192
ChRWR	7	5	0.088
ChRWR	8	4	0.38
ChRWR	8	5	1.033

## Sheet: D
Line	sample number	trial number	strength
SpiRh1	1	1	0.140481
SpiRh1	1	4	0.433143
SpiRh1	1	5	0.339171
SpiRh1	2	1	0.3211
SpiRh1	2	2	0.322871
SpiRh1	2	3	0.496435
SpiRh1	2	4	0.342465
SpiRh1	2	5	0.40889
SpiRh1	2	6	0.288221
SpiRh1	3	1	0.351021
SpiRh1	3	4	0.511415
SpiRh1	4	1	0.951361
SpiRh1	4	3	0.299265
SpiRh1	4	4	0.478669
SpiRh1	4	5	0.544433
SpiRh1	5	1	0.396111
SpiRh1	5	2	0.392645
SpiRh1	5	3	0.356841
SpiRh1	6	2	0.452225
SpiRh1	6	3	0.435273
SpiRh1	6	4	0.458922
SpiRh1	6	5	0.477405
SpiRh1	6	6	0.425787
SpiRh1	7	1	0.437643
SpiRh1	7	2	0.568344
SpiRh1	7	3	0.414339
SpiRh1	7	4	0.477365
SpiRh1	7	5	0.500827
SpiRh1	7	6	0.454448
SpiRh1	8	1	0.805306
SpiRh1	8	2	0.301411
SpiRh1	8	3	0.323016
SpiRh1	8	4	0.301762
SpiRh1	8	5	0.295528
SpiRh1	8	6	0.546646
SpiRh1	9	1	0.396
SpiRh1	9	2	0.56
SpiRh1	9	3	0.6
SpiRh1	9	4	0.65
SpiRh1	9	5	0.634
SpiRh1	9	6	0.499
SpiRh1	10	1	1.028
SpiRh1	10	4	0.495
SpiRh1	10	5	0.953
SpiRh1	10	6	0.445
SpiRh1	11	2	0.282
SpiRh1	11	3	0.943
SpiRh1	11	4	0.89
SpiRh1	11	5	0.2
SpiRh1	11	6	0.328
SpiRh1	12	1	0.506
SpiRh1	12	2	0.28
SpiRh1	12	3	0.558
SpiRh1[S186F]	1	1	0.321216
SpiRh1[S186F]	1	2	0.435368
SpiRh1[S186F]	1	3	0.564854
SpiRh1[S186F]	1	4	0.812167
SpiRh1[S186F]	1	5	0.537779
SpiRh1[S186F]	2	3	0.328482
SpiRh1[S186F]	2	4	0.211813
SpiRh1[S186F]	2	5	0.667982
SpiRh1[S186F]	2	6	0.73251
SpiRh1[S186F]	3	1	0.728057
SpiRh1[S186F]	3	2	0.455523
SpiRh1[S186F]	4	2	0.154348
SpiRh1[S186F]	4	3	0.282609
SpiRh1[S186F]	4	4	0.198276
SpiRh1[S186F]	4	5	0.184946
SpiRh1[S186F]	4	6	0.153017
SpiRh1[S186F]	5	1	0.624599
SpiRh1[S186F]	5	2	0.985748
SpiRh1[S186F]	5	3	1.05533
SpiRh1[S186F]	5	4	0.555155
SpiRh1[S186F]	5	5	0.586695
SpiRh1[S186F]	6	1	0.495968
SpiRh1[S186F]	6	2	0.874016
SpiRh1[S186F]	6	3	0.873767
SpiRh1[S186F]	6	4	0.780933
SpiRh1[S186F]	6	5	0.847222
SpiRh1[S186F]	6	6	1.10848
SpiRh1[S186F]	7	1	0.284665
SpiRh1[S186F]	7	3	1.12069
SpiRh1[S186F]	7	5	0.486947
SpiRh1[S186F]	7	6	0.236902
SpiRh1[S186F]	8	2	0.504108
SpiRh1[S186F]	8	3	0.941367
SpiRh1[S186F]	8	4	0.679978
SpiRh1[S186F]	9	1	0.269
SpiRh1[S186F]	9	2	0.509
SpiRh1[S186F]	9	3	0.27
SpiRh1[S186F]	9	4	0.906
SpiRh1[S186F]	9	5	0.682
SpiRh1[S186F]	9	6	0.672
SpiRh1[S186F]	10	1	0.462
SpiRh1[S186F]	10	2	0.833
SpiRh1[S186F]	10	3	0.454
SpiRh1[S186F]	10	4	0.642
SpiRh1[S186F]	10	5	0.636
SpiRh1[S186F]	10	6	0.592
SpiRh1[S186F]	11	1	0.831
SpiRh1[S186F]	11	2	0.933
SpiRh1[S186F]	11	3	0.992
SpiRh1[S186F]	11	4	0.941
SpiRh1[S186F]	11	5	0.531
SpiRh1[S186F]	11	6	0.688
SpiRh1[S186F]	12	1	0.702
SpiRh1[S186F]	12	2	0.831
SpiRh1[S186F]	12	3	0.768
SpiRh1[S186F]	12	4	0.768
ChRWR	1	2	0.406294
ChRWR	1	5	0.421016
ChRWR	2	1	0.989071
ChRWR	2	6	0.675725
ChRWR	3	1	0.486632
ChRWR	3	3	0.633757
ChRWR	3	4	0.716961
ChRWR	3	5	0.625622
ChRWR	4	1	0.86794
ChRWR	4	3	0.400981
ChRWR	4	4	0.152328
ChRWR	4	5	0.122163
ChRWR	4	6	0.183869
ChRWR	5	2	0.329503
ChRWR	5	3	0.24949
ChRWR	5	4	0.316643
ChRWR	5	5	0.243134
ChRWR	6	1	1.13979
ChRWR	6	2	1.01043
ChRWR	6	4	1.1509
ChRWR	6	5	1.00485
ChRWR	6	6	0.556349
ChRWR	7	1	0.429126
ChRWR	7	2	0.671851
ChRWR	7	3	0.680121
ChRWR	7	4	0.560625
ChRWR	7	5	0.609218
ChRWR	8	4	0.45
ChRWR	8	5	0.388889

## Sheet: E
Line	light intensity(mW/mm2)	sample number	trial number	yes:tail was moved not counted: tail was moved before the light no: tail was not moved
SpiRh1	0.1	1	1	yes
SpiRh1	0.1	1	2	yes
SpiRh1	0.1	1	3	no
SpiRh1	0.1	1	4	yes
SpiRh1	0.1	1	5	yes
SpiRh1	0.1	1	6	no
SpiRh1	0.1	2	1	yes
SpiRh1	0.1	2	2	no
SpiRh1	0.1	2	3	yes
SpiRh1	0.1	2	4	no
SpiRh1	0.1	2	5	not counted
SpiRh1	0.1	2	6	yes
SpiRh1	0.1	3	1	yes
SpiRh1	0.1	3	2	not counted
SpiRh1	0.1	3	3	yes
SpiRh1	0.1	3	4	yes
SpiRh1	0.1	3	5	yes
SpiRh1	0.1	3	6	not counted
SpiRh1	0.1	4	1	yes
SpiRh1	0.1	4	2	not counted
SpiRh1	0.1	4	3	yes
SpiRh1	0.1	4	4	yes
SpiRh1	0.1	4	5	yes
SpiRh1	0.1	4	6	yes
SpiRh1	0.2	1	1	yes
SpiRh1	0.2	1	2	yes
SpiRh1	0.2	1	3	yes
SpiRh1	0.2	1	4	yes
SpiRh1	0.2	1	5	no
SpiRh1	0.2	1	6	yes
SpiRh1	0.2	2	1	yes
SpiRh1	0.2	2	2	yes
SpiRh1	0.2	2	3	no
SpiRh1	0.2	2	4	not counted
SpiRh1	0.2	2	5	yes
SpiRh1	0.2	2	6	yes
SpiRh1	0.2	3	1	yes
SpiRh1	0.2	3	2	yes
SpiRh1	0.2	3	3	yes
SpiRh1	0.2	3	4	yes
SpiRh1	0.2	3	5	not counted
SpiRh1	0.2	3	6	yes
SpiRh1	0.2	4	1	yes
SpiRh1	0.2	4	2	yes
SpiRh1	0.2	4	3	yes
SpiRh1	0.2	4	4	yes
SpiRh1	0.2	4	5	yes
SpiRh1	0.2	4	6	yes
SpiRh1[S186F]	0.1	1	1	yes
SpiRh1[S186F]	0.1	1	2	yes
SpiRh1[S186F]	0.1	1	3	yes
SpiRh1[S186F]	0.1	1	4	yes
SpiRh1[S186F]	0.1	1	5	not counted
SpiRh1[S186F]	0.1	1	6	not counted
SpiRh1[S186F]	0.1	2	1	no
SpiRh1[S186F]	0.1	2	2	no
SpiRh1[S186F]	0.1	2	3	no
SpiRh1[S186F]	0.1	2	4	not counted
SpiRh1[S186F]	0.1	2	5	yes
SpiRh1[S186F]	0.1	2	6	yes
SpiRh1[S186F]	0.1	3	1	yes
SpiRh1[S186F]	0.1	3	2	yes
SpiRh1[S186F]	0.1	3	3	not counted
SpiRh1[S186F]	0.1	3	4	yes
SpiRh1[S186F]	0.1	3	5	no
SpiRh1[S186F]	0.1	3	6	yes
SpiRh1[S186F]	0.1	4	1	yes
SpiRh1[S186F]	0.1	4	2	no
SpiRh1[S186F]	0.1	4	3	no
SpiRh1[S186F]	0.1	4	4	yes
SpiRh1[S186F]	0.1	4	5	no
SpiRh1[S186F]	0.1	4	6	yes
SpiRh1[S186F]	0.2	1	1	yes
SpiRh1[S186F]	0.2	1	2	yes
SpiRh1[S186F]	0.2	1	3	yes
SpiRh1[S186F]	0.2	1	4	yes
SpiRh1[S186F]	0.2	1	5	yes
SpiRh1[S186F]	0.2	1	6	yes
SpiRh1[S186F]	0.2	2	1	yes
SpiRh1[S186F]	0.2	2	2	yes
SpiRh1[S186F]	0.2	2	3	yes
SpiRh1[S186F]	0.2	2	4	yes
SpiRh1[S186F]	0.2	2	5	yes
SpiRh1[S186F]	0.2	2	6	yes
SpiRh1[S186F]	0.2	3	1	yes
SpiRh1[S186F]	0.2	3	2	yes
SpiRh1[S186F]	0.2	3	3	yes
SpiRh1[S186F]	0.2	3	4	no
SpiRh1[S186F]	0.2	3	5	yes
SpiRh1[S186F]	0.2	3	6	not counted
SpiRh1[S186F]	0.2	4	1	yes
SpiRh1[S186F]	0.2	4	2	yes
SpiRh1[S186F]	0.2	4	3	yes
SpiRh1[S186F]	0.2	4	4	no
SpiRh1[S186F]	0.2	4	5	not counted
SpiRh1[S186F]	0.2	4	6	yes
ChRWR	0.1	1	1	no
ChRWR	0.1	1	2	no
ChRWR	0.1	1	3	no
ChRWR	0.1	1	4	yes
ChRWR	0.1	1	5	no
ChRWR	0.1	1	6	no
ChRWR	0.1	2	1	no
ChRWR	0.1	2	2	no
ChRWR	0.1	2	3	no
ChRWR	0.1	2	4	no
ChRWR	0.1	2	5	not counted
ChRWR	0.1	2	6	no
ChRWR	0.1	3	1	no
ChRWR	0.1	3	2	not counted
ChRWR	0.1	3	3	no
ChRWR	0.1	3	4	no
ChRWR	0.1	3	5	no
ChRWR	0.1	3	6	not counted
ChRWR	0.1	4	1	no
ChRWR	0.1	4	2	not counted
ChRWR	0.1	4	3	no
ChRWR	0.1	4	4	no
ChRWR	0.1	4	5	no
ChRWR	0.1	4	6	yes
ChRWR	0.2	1	1	no
ChRWR	0.2	1	2	no
ChRWR	0.2	1	3	yes
ChRWR	0.2	1	4	no
ChRWR	0.2	1	5	no
ChRWR	0.2	1	6	no
ChRWR	0.2	2	1	no
ChRWR	0.2	2	2	no
ChRWR	0.2	2	3	no
ChRWR	0.2	2	4	no
ChRWR	0.2	2	5	not counted
ChRWR	0.2	2	6	no
ChRWR	0.2	3	1	no
ChRWR	0.2	3	2	not counted
ChRWR	0.2	3	3	no
ChRWR	0.2	3	4	no
ChRWR	0.2	3	5	no
ChRWR	0.2	3	6	not counted
ChRWR	0.2	4	1	no
ChRWR	0.2	4	2	yes
ChRWR	0.2	4	3	yes
ChRWR	0.2	4	4	no
ChRWR	0.2	4	5	no
ChRWR	0.2	4	6	no
SpiRh1	0.4	1	1	yes
SpiRh1	0.4	1	2	not counted
SpiRh1	0.4	1	3	not counted
SpiRh1	0.4	1	4	yes
SpiRh1	0.4	1	5	yes
SpiRh1	0.4	1	6	not counted
SpiRh1	0.4	2	1	yes
SpiRh1	0.4	2	2	yes
SpiRh1	0.4	2	3	yes
SpiRh1	0.4	2	4	yes
SpiRh1	0.4	2	5	yes
SpiRh1	0.4	2	6	yes
SpiRh1	0.4	3	1	yes
SpiRh1	0.4	3	2	not counted
SpiRh1	0.4	3	3	not counted
SpiRh1	0.4	3	4	yes
SpiRh1	0.4	3	5	no
SpiRh1	0.4	3	6	not counted
SpiRh1	0.4	4	1	yes
SpiRh1	0.4	4	2	no
SpiRh1	0.4	4	3	yes
SpiRh1	0.4	4	4	yes
SpiRh1	0.4	4	5	yes
SpiRh1	0.4	4	6	not counted
SpiRh1	0.4	5	1	yes
SpiRh1	0.4	5	2	yes
SpiRh1	0.4	5	3	yes
SpiRh1	0.4	5	4	not counted
SpiRh1	0.4	5	5	not counted
SpiRh1	0.4	5	6	not counted
SpiRh1	0.4	6	1	no
SpiRh1	0.4	6	2	yes
SpiRh1	0.4	6	3	yes
SpiRh1	0.4	6	4	yes
SpiRh1	0.4	6	5	yes
SpiRh1	0.4	6	6	yes
SpiRh1	0.4	7	1	yes
SpiRh1	0.4	7	2	yes
SpiRh1	0.4	7	3	yes
SpiRh1	0.4	7	4	yes
SpiRh1	0.4	7	5	yes
SpiRh1	0.4	7	6	yes
SpiRh1	0.4	8	1	yes
SpiRh1	0.4	8	2	yes
SpiRh1	0.4	8	3	yes
SpiRh1	0.4	8	4	yes
SpiRh1	0.4	8	5	yes
SpiRh1	0.4	8	6	yes
SpiRh1	0.4	9	1	yes
SpiRh1	0.4	9	2	yes
SpiRh1	0.4	9	3	yes
SpiRh1	0.4	9	4	yes
SpiRh1	0.4	9	5	yes
SpiRh1	0.4	9	6	yes
SpiRh1	0.4	10	1	yes
SpiRh1	0.4	10	2	no
SpiRh1	0.4	10	3	not counted
SpiRh1	0.4	10	4	yes
SpiRh1	0.4	10	5	yes
SpiRh1	0.4	10	6	yes
SpiRh1	0.4	11	1	no
SpiRh1	0.4	11	2	yes
SpiRh1	0.4	11	3	yes
SpiRh1	0.4	11	4	yes
SpiRh1	0.4	11	5	yes
SpiRh1	0.4	11	6	yes
SpiRh1	0.4	12	1	yes
SpiRh1	0.4	12	2	yes
SpiRh1	0.4	12	3	yes
SpiRh1	0.4	12	4	not counted
SpiRh1	0.4	12	5	not counted
SpiRh1	0.4	12	6	no
SpiRh1[S186F]	0.4	1	1	yes
SpiRh1[S186F]	0.4	1	2	yes
SpiRh1[S186F]	0.4	1	3	yes
SpiRh1[S186F]	0.4	1	4	yes
SpiRh1[S186F]	0.4	1	5	yes
SpiRh1[S186F]	0.4	1	6	not counted
SpiRh1[S186F]	0.4	2	1	no
SpiRh1[S186F]	0.4	2	2	no
SpiRh1[S186F]	0.4	2	3	yes
SpiRh1[S186F]	0.4	2	4	yes
SpiRh1[S186F]	0.4	2	5	yes
SpiRh1[S186F]	0.4	2	6	yes
SpiRh1[S186F]	0.4	3	1	yes
SpiRh1[S186F]	0.4	3	2	yes
SpiRh1[S186F]	0.4	3	3	not counted
SpiRh1[S186F]	0.4	3	4	not counted
SpiRh1[S186F]	0.4	3	5	not counted
SpiRh1[S186F]	0.4	3	6	no
SpiRh1[S186F]	0.4	4	1	no
SpiRh1[S186F]	0.4	4	2	yes
SpiRh1[S186F]	0.4	4	3	yes
SpiRh1[S186F]	0.4	4	4	yes
SpiRh1[S186F]	0.4	4	5	yes
SpiRh1[S186F]	0.4	4	6	yes
SpiRh1[S186F]	0.4	5	1	yes
SpiRh1[S186F]	0.4	5	2	yes
SpiRh1[S186F]	0.4	5	3	yes
SpiRh1[S186F]	0.4	5	4	yes
SpiRh1[S186F]	0.4	5	5	yes
SpiRh1[S186F]	0.4	5	6	not counted
SpiRh1[S186F]	0.4	6	1	yes
SpiRh1[S186F]	0.4	6	2	yes
SpiRh1[S186F]	0.4	6	3	yes
SpiRh1[S186F]	0.4	6	4	yes
SpiRh1[S186F]	0.4	6	5	yes
SpiRh1[S186F]	0.4	6	6	yes
SpiRh1[S186F]	0.4	7	1	yes
SpiRh1[S186F]	0.4	7	2	not counted
SpiRh1[S186F]	0.4	7	3	yes
SpiRh1[S186F]	0.4	7	4	no
SpiRh1[S186F]	0.4	7	5	yes
SpiRh1[S186F]	0.4	7	6	yes
SpiRh1[S186F]	0.4	8	1	not counted
SpiRh1[S186F]	0.4	8	2	yes
SpiRh1[S186F]	0.4	8	3	yes
SpiRh1[S186F]	0.4	8	4	yes
SpiRh1[S186F]	0.4	8	5	not counted
SpiRh1[S186F]	0.4	8	6	not counted
SpiRh1[S186F]	0.4	9	1	yes
SpiRh1[S186F]	0.4	9	2	yes
SpiRh1[S186F]	0.4	9	3	yes
SpiRh1[S186F]	0.4	9	4	yes
SpiRh1[S186F]	0.4	9	5	yes
SpiRh1[S186F]	0.4	9	6	yes
SpiRh1[S186F]	0.4	10	1	yes
SpiRh1[S186F]	0.4	10	2	yes
SpiRh1[S186F]	0.4	10	3	yes
SpiRh1[S186F]	0.4	10	4	yes
SpiRh1[S186F]	0.4	10	5	yes
SpiRh1[S186F]	0.4	10	6	yes
SpiRh1[S186F]	0.4	11	1	yes
SpiRh1[S186F]	0.4	11	2	yes
SpiRh1[S186F]	0.4	11	3	yes
SpiRh1[S186F]	0.4	11	4	yes
SpiRh1[S186F]	0.4	11	5	yes
SpiRh1[S186F]	0.4	11	6	yes
SpiRh1[S186F]	0.4	12	1	yes
SpiRh1[S186F]	0.4	12	2	yes
SpiRh1[S186F]	0.4	12	3	yes
SpiRh1[S186F]	0.4	12	4	yes
SpiRh1[S186F]	0.4	12	5	△
SpiRh1[S186F]	0.4	12	6	△
ChRWR	0.4	1	1	no
ChRWR	0.4	1	2	yes
ChRWR	0.4	1	3	no
ChRWR	0.4	1	4	no
ChRWR	0.4	1	5	yes
ChRWR	0.4	1	6	no
ChRWR	0.4	2	1	yes
ChRWR	0.4	2	2	not counted
ChRWR	0.4	2	3	no
ChRWR	0.4	2	4	no
ChRWR	0.4	2	5	no
ChRWR	0.4	2	6	yes
ChRWR	0.4	3	1	yes
ChRWR	0.4	3	2	not counted
ChRWR	0.4	3	3	yes
ChRWR	0.4	3	4	yes
ChRWR	0.4	3	5	yes
ChRWR	0.4	3	6	not counted
ChRWR	0.4	4	1	yes
ChRWR	0.4	4	2	no
ChRWR	0.4	4	3	yes
ChRWR	0.4	4	4	yes
ChRWR	0.4	4	5	yes
ChRWR	0.4	4	6	yes
ChRWR	0.4	5	1	no
ChRWR	0.4	5	2	yes
ChRWR	0.4	5	3	yes
ChRWR	0.4	5	4	yes
ChRWR	0.4	5	5	yes
ChRWR	0.4	5	6	no
ChRWR	0.4	6	1	yes
ChRWR	0.4	6	2	yes
ChRWR	0.4	6	3	not counted
ChRWR	0.4	6	4	yes
ChRWR	0.4	6	5	yes
ChRWR	0.4	6	6	yes
ChRWR	0.4	7	1	yes
ChRWR	0.4	7	2	yes
ChRWR	0.4	7	3	yes
ChRWR	0.4	7	4	yes
ChRWR	0.4	7	5	yes
ChRWR	0.4	7	6	not counted
ChRWR	0.4	8	1	no
ChRWR	0.4	8	2	not counted
ChRWR	0.4	8	3	not counted
ChRWR	0.4	8	4	yes
ChRWR	0.4	8	5	yes
ChRWR	0.4	8	6	not counted

## Sheet: F
	SpiRh1 or control	SpiRh1	SpiRh1	SpiRh1	SpiRh1	SpiRh1	SpiRh1	control	control	control	control	control	control
	sample number	1	1	1	2	2	2	1	1	1	2	2	2
	trial number	1	2	3	1	2	3	1	2	3	1	2	3
time point	0	1	1	1	1	1	1	1	1	1	1	1	1
	0.1	-0.0041175	-0.015892	-0.0121647	-0.0234499	-0.0118078	-0.0170899	-0.023054	-0.0275244	-0.0240452	0.019729	-0.0118466	-0.0442932
	0.2	-0.0136823	-0.0204506	-0.0193501	-0.035781	-0.023779	-0.0288842	-0.0393898	-0.0428813	-0.0380979	0.013457	-0.0207225	-0.0670349
	0.4	-0.0187998	-0.0243923	-0.0236483	-0.0478466	-0.0269741	-0.0381409	-0.051109	-0.059739	-0.0554565	0.00675	-0.0289949	-0.0780029
	0.5	-0.0229762	-0.029073	-0.0283518	-0.0604188	-0.0318192	-0.0461027	-0.0621045	-0.0705542	-0.0665528	-0.0007985	-0.0335429	-0.0909305
	0.6	-0.0246074	-0.0322503	-0.0353621	-0.0684676	-0.0407837	-0.0495107	-0.0717525	-0.0749886	-0.0766708	-0.0054793	-0.037152	-0.0995438
	0.7	-0.0313696	-0.0348462	-0.0361234	-0.0729667	-0.0424471	-0.053454	-0.0795412	-0.0803459	-0.0839	-0.0096164	-0.0424408	-0.108064
	0.8	-0.0288674	-0.0385439	-0.039335	-0.0762278	-0.049782	-0.0557969	-0.0864462	-0.0903679	-0.0940683	-0.0144033	-0.0465205	-0.114783
	1	-0.0304583	-0.0409975	-0.0380007	-0.0858238	-0.0533226	-0.0607463	-0.0933674	-0.0944741	-0.0997005	-0.0212646	-0.0494972	-0.121964
	1.1	-0.0302122	-0.0430824	-0.0419844	-0.0916184	-0.0551369	-0.063408	-0.100334	-0.0968782	-0.10666	-0.0245754	-0.0529919	-0.126988
	1.2	-0.0354401	-0.0447401	-0.0473984	-0.0958863	-0.0593525	-0.0663832	-0.106252	-0.103564	-0.11066	-0.0269482	-0.0560524	-0.131376
	1.3	-0.037809	-0.0480238	-0.047945	-0.0991473	-0.0620707	-0.0709186	-0.108444	-0.107907	-0.113504	-0.0304444	-0.0603122	-0.123011
	1.4	-0.037178	-0.0504674	-0.0492713	-0.100693	-0.0648336	-0.0707738	-0.114036	-0.111501	-0.118305	-0.0310403	-0.0621607	-0.0897921
	1.6	-0.0384073	-0.0527002	-0.0509072	-0.105421	-0.0683352	-0.0712181	-0.116172	-0.115183	-0.120937	-0.032113	-0.0679669	-0.0749577
	1.7	-0.0375746	-0.0532799	-0.0504116	-0.109153	-0.069362	-0.0726926	-0.115771	-0.118399	-0.123265	-0.031716	-0.0671815	-0.0616035
	1.8	-0.0390711	-0.0541807	-0.0562982	-0.110168	-0.0717901	-0.0747636	-0.119591	-0.118114	-0.124389	-0.0222815	-0.0650725	-0.010389
	1.9	-0.0411015	-0.0559303	-0.0570924	-0.112072	-0.0731464	-0.0754872	-0.118445	-0.123614	-0.123783	0.01892	-0.0424083	0.017914
	2	-0.0419449	-0.0561327	-0.0589986	-0.115805	-0.0743533	-0.0790046	-0.116587	-0.122158	-0.12517	0.039942	-0.0124242	0.036191
	2.2	-0.0440092	-0.057187	-0.0560013	-0.118096	-0.0766565	-0.0779865	-0.116707	-0.12309	-0.12266	0.04776	0.001241	0.080334
	2.3	-0.0397184	-0.0584797	-0.0571162	-0.118776	-0.0773841	-0.0812331	-0.116239	-0.122504	-0.126331	0.07226	0.014945	0.123422
	2.4	-0.0418865	-0.0583156	-0.0600828	-0.12005	-0.0796333	-0.08279	-0.115531	-0.119642	-0.127568	0.11923	0.057044	0.121759
	2.5	-0.0424425	-0.0585214	-0.0597336	-0.127437	-0.0818471	-0.0862904	-0.115258	-0.117997	-0.126142	0.131113	0.108085	0.101746
	2.6	-0.0431718	-0.0606067	-0.0606997	-0.127327	-0.081982	-0.0851086	-0.113451	-0.114509	-0.125543	0.127911	0.119692	0.077008
	2.8	-0.0450606	-0.0613642	-0.0621487	-0.128772	-0.0837136	-0.0881207	-0.110072	-0.112648	-0.122357	0.151843	0.10964	0.053099
	2.9	-0.0464824	-0.0618929	-0.0591871	-0.13122	-0.0860464	-0.0865445	-0.0762183	-0.108576	-0.116397	0.216968	0.096743	0.031763
	3	-0.0486421	-0.066192	-0.058633	-0.130983	-0.0865222	-0.0880289	-0.0647227	-0.106584	-0.11665	0.211536	0.0858	0.011814
	3.1	-0.0487122	-0.0657541	-0.0589377	-0.137227	-0.0856056	-0.089262	-0.0599561	-0.104803	-0.10744	0.198303	0.155526	-0.004196
	3.2	-0.0512144	-0.0693272	-0.0623164	-0.132562	-0.0863488	-0.0894313	-0.0566618	-0.1005	-0.095766	0.184157	0.208848	-0.017258
	3.4	-0.0501449	-0.0693046	-0.0628473	-0.133292	-0.086653	-0.0898952	-0.0516174	-0.063492	-0.0923103	0.174187	0.256301	-0.0273197
	3.5	-0.0513838	-0.067318	-0.0603719	-0.136536	-0.087693	-0.0930874	-0.0466555	-0.0512619	-0.076888	0.191662	0.27711	-0.036094
	3.6	-0.0505244	-0.0656976	-0.0603766	-0.133694	-0.0872558	-0.0924302	-0.0259619	-0.0455568	-0.0575245	0.243782	0.273202	-0.0408614
	3.7	-0.0506656	-0.0670401	-0.0635948	-0.136389	-0.0865945	-0.0973514	0.011906	-0.0337742	-0.0262543	0.29916	0.248345	-0.0048509
	3.8	-0.0517088	-0.0676195	-0.0633137	-0.137745	-0.090019	-0.0983597	0.019655	-0.0017043	-0.012981	0.346824	0.224256	0.021137
	4	-0.0539742	-0.0672517	-0.0628931	-0.139508	-0.0903188	-0.0981387	0.017927	0.005612	0.005379	0.348196	0.200955	0.111342
	4.1	-0.0529498	-0.066834	-0.0628598	-0.142465	-0.0933129	-0.0990541	0.011821	0.013005	0.041878	0.32617	0.18012	0.145137
	4.2	-0.0501886	-0.0671041	-0.0636566	-0.143173	-0.0933122	-0.0994552	0.005006	0.0507	0.057914	0.2917	0.207539	0.185418
	4.3	-0.0528984	-0.0682114	-0.0610514	-0.140099	-0.0909405	-0.0986703	-0.0018376	0.083829	0.069	0.262841	0.245697	0.167459
	4.4	-0.0519803	-0.0694527	-0.0626062	-0.144599	-0.0925813	-0.100722	-0.0088832	0.088489	0.081604	0.238024	0.275565	0.1378
	4.6	-0.0522653	-0.0697802	-0.0639347	-0.144962	-0.0899206	-0.102577	-0.0163569	0.083749	0.094032	0.21864	0.323954	0.107977
	4.7	-0.0541713	-0.0709996	-0.059524	-0.138529	-0.0879275	-0.104065	-0.0193149	0.077103	0.107755	0.201948	0.366375	0.080949
	4.8	-0.0530684	-0.072014	-0.0613071	-0.140112	-0.0890396	-0.102353	-0.0244851	0.068072	0.117502	0.246143	0.372572	0.059692
	4.9	-0.053464	-0.0708773	-0.0676275	-0.138748	-0.0895503	-0.103099	-0.0263489	0.060456	0.136271	0.304376	0.356627	0.039037
	5	-0.0555556	-0.070855	-0.0653482	-0.13786	-0.0874171	-0.103968	-0.0283379	0.049971	0.154169	0.359501	0.355188	0.019598
	5.2	-0.0545705	-0.0708512	-0.0657789	-0.138791	-0.0879016	-0.104371	-0.0302139	0.041005	0.14952	0.402498	0.359456	0.003184
	5.3	-0.051922	-0.0710133	-0.0678627	-0.141735	-0.0828753	-0.107733	-0.0296695	0.033917	0.138301	0.467922	0.334758	-0.0107612
	5.4	-0.0534669	-0.070826	-0.0703625	-0.135823	-0.0830264	-0.108216	-0.0182607	0.029113	0.127711	0.454528	0.304885	-0.0213937
	5.5	-0.0542302	-0.0702049	-0.0703096	-0.134024	-0.0836275	-0.106922	0.008439	0.02517	0.114306	0.417771	0.277916	-0.0316518
	5.6	-0.0536825	-0.0716941	-0.0714934	-0.135068	-0.086706	-0.108238	0.015624	0.019272	0.103917	0.38303	0.255576	-0.0412853
	5.8	-0.055636	-0.0708034	-0.0697747	-0.131405	-0.0804346	-0.117418	0.017398	0.035416	0.090298	0.347283	0.239559	-0.0490957
	5.9	-0.057687	-0.0709269	-0.0684965	-0.134452	-0.0770686	-0.115109	0.018857	0.044278	0.086704	0.317627	0.226662	-0.0553743
	6	-0.0574815	-0.0690147	-0.0643798	-0.130062	-0.0740255	-0.11722	0.020919	0.046201	0.074099	0.288503	0.305972	-0.0619178
	6.1	-0.0557684	-0.0706614	-0.0652793	-0.125835	-0.0730282	-0.117172	0.023229	0.046689	0.066877	0.265028	0.378607	-0.0659261
	6.2	-0.0565268	-0.0696985	-0.0700129	-0.127072	-0.0772508	-0.116544	0.02537	0.046657	0.066499	0.243374	0.361648	-0.0705104
	6.4	-0.0564263	-0.0706924	-0.0705189	-0.120635	-0.0742024	-0.119097	0.029208	0.043539	0.052162	0.224562	0.333061	-0.0763156
	6.5	-0.0566893	-0.0692858	-0.0671148	-0.121195	-0.0657684	-0.118292	0.02621	0.045912	0.052381	0.206165	0.303795	-0.079821
	6.6	-0.0577551	-0.0715297	-0.0674216	-0.118098	-0.0660953	-0.119829	0.050597	0.04542	0.048034	0.193405	0.274731	-0.083466
	6.7	-0.057617	-0.0704132	-0.0669218	-0.116663	-0.0721201	-0.118945	0.061283	0.047059	0.041547	0.181262	0.254528	-0.0885226
	6.8	-0.0551068	-0.071624	-0.066914	-0.112263	-0.0730395	-0.121443	0.063626	0.045696	0.041059	0.169017	0.252114	-0.0900447
	7	-0.0566955	-0.0701	-0.0720387	-0.101105	-0.0715364	-0.120288	0.057498	0.062071	0.041066	0.160108	0.313727	-0.0922124
	7.1	-0.0544266	-0.0705705	-0.0687672	-0.0947363	-0.0705485	-0.118101	0.051493	0.069794	0.04276	0.15189	0.3231	-0.0864549
	7.2	-0.0563531	-0.0702768	-0.0676882	-0.0982909	-0.0711368	-0.115007	0.043528	0.108245	0.042419	0.145613	0.30444	-0.037225
	7.3	-0.0558062	-0.070006	-0.0683712	-0.0990506	-0.0709258	-0.117005	0.036074	0.111241	0.06623	0.137627	0.282321	-0.0176374
	7.4	-0.0588353	-0.069331	-0.0724956	-0.0904166	-0.0696077	-0.116426	0.03268	0.104462	0.063434	0.131261	0.25926	-0.0148466
	7.6	-0.0518867	-0.0708579	-0.0730752	-0.0809106	-0.0680533	-0.112451	0.027127	0.094157	0.060249	0.126558	0.237896	-0.0231811
	7.7	-0.0545183	-0.0718274	-0.0723074	-0.0766197	-0.0686474	-0.110451	0.021839	0.087847	0.061501	0.122442	0.217487	-0.0323796
	7.8	-0.0524917	-0.0712719	-0.0713994	-0.0745907	-0.0702161	-0.110058	0.019105	0.077833	0.062321	0.118242	0.203143	-0.0428329
	7.9	-0.0539247	-0.0709584	-0.0698728	-0.074793	-0.0684653	-0.110538	0.015835	0.072029	0.069072	0.111012	0.187289	-0.0510817
	8	-0.0546164	-0.071936	-0.0741404	-0.0614988	-0.070233	-0.108606	0.012776	0.066205	0.064168	0.107258	0.175239	-0.0576707
	8.2	-0.0565777	-0.0692533	-0.0624624	-0.011485	-0.0730598	-0.102293	0.010016	0.065232	0.06566	0.103626	0.19828	-0.0613218
	8.3	-0.0554299	-0.0695261	-0.058038	0.004529	-0.0727763	-0.0993713	0.00478	0.063744	0.069059	0.100644	0.230719	-0.0646516
	8.4	-0.0567687	-0.0688369	-0.0547881	0.02382	-0.0691934	-0.0980555	0.000778	0.055281	0.069652	0.098358	0.295747	-0.0658221
	8.5	-0.0557542	-0.0689275	-0.0502253	0.065979	-0.0594051	-0.0990683	-0.0036114	0.052633	0.092112	0.09651	0.313013	-0.0676787
	8.6	-0.057923	-0.0685963	-0.0499299	0.131011	-0.0055743	-0.0977141	-0.0057355	0.051725	0.094486	0.094032	0.355485	-0.0697719
	8.8	-0.0568241	-0.0679181	-0.0518303	0.145573	0.022846	-0.0989385	-0.0074996	0.047298	0.093303	0.093826	0.416668	-0.070213
	8.9	-0.0569243	-0.0654246	-0.0523124	0.134411	0.036503	-0.0944446	-0.0093727	0.045592	0.093019	0.092495	0.424576	-0.0172272
	9	-0.0552574	-0.0682018	-0.0503066	0.116635	0.047821	-0.0931037	-0.0113498	0.043954	0.094068	0.093526	0.454187	0.036113
	9.1	-0.0550414	-0.0665401	-0.0518103	0.090396	0.04302	-0.0882385	-0.0110786	0.043624	0.103612	0.094006	0.480173	0.07003
	9.2	-0.0544815	-0.0674227	-0.0503538	0.073037	0.034368	-0.0858324	-0.0111487	0.044878	0.128909	0.092638	0.499337	0.131225
	9.4	-0.0540059	-0.0631774	-0.050905	0.054899	0.027153	-0.0848678	-0.0114918	0.044202	0.150542	0.091613	0.515129	0.141759
	9.5	-0.0536422	-0.0619565	-0.0527763	0.038951	0.023418	-0.0845318	-0.0128662	0.041144	0.149218	0.094061	0.53289	0.142592
	9.6	-0.0543766	-0.0630313	-0.0508378	0.021798	0.054412	-0.088809	-0.0149013	0.046646	0.139087	0.092972	0.535625	0.172673
	9.7	-0.0547532	-0.0609428	-0.0542532	0.015756	0.101868	-0.0897235	-0.0160631	0.045469	0.129056	0.092297	0.55302	0.196414
	9.8	-0.053727	-0.0604227	-0.054105	-0.0022342	0.117801	-0.0846483	-0.0130521	0.046603	0.119539	0.092727	0.548512	0.22193
	10	-0.0533233	-0.0608905	-0.0545411	-0.0107598	0.121188	-0.0805715	-0.0153946	0.044226	0.106461	0.093181	0.568319	0.242718

## Sheet: G
	SpiRh1[S186F] or control	SpiRh1[S186F]	SpiRh1[S186F]	SpiRh1[S186F]	SpiRh1[S186F]	SpiRh1[S186F]	SpiRh1[S186F]	control	control	control	control	control	control
	sample number	1	1	1	2	2	2	1	1	1	2	2	2
	trial number	1	2	3	1	2	3	1	2	3	1	2	3
time point	3.6	0.051812	0.16288	-0.051559	0.104411	0.121367	0.370634	-0.173994	-0.182015	-0.173437	-0.156756	-0.151255	-0.184352
	3.7	0.153358	0.174634	-0.0307966	0.095736	0.078082	0.372573	-0.169168	-0.180955	-0.169489	-0.154409	-0.148068	-0.17628
	3.8	0.127545	0.191243	-0.0178341	0.087302	0.060248	0.374024	-0.167259	-0.174539	-0.164869	-0.152404	-0.147843	-0.174054
	3.9	0.112149	0.208388	-0.0006468	0.084523	0.044656	0.37322	-0.163238	-0.169718	-0.160266	-0.151514	-0.147534	-0.171202
	4	0.10153	0.228076	0.016236	0.102079	0.042494	0.393106	-0.160561	-0.167478	-0.156319	-0.150569	-0.144215	-0.165819
	4.1	0.093712	0.249452	0.042681	0.114765	0.048936	0.414302	-0.158286	-0.162705	-0.152532	-0.147236	-0.143474	-0.165418
	4.2	0.090737	0.287006	0.063823	0.134248	0.06574	0.431871	-0.156008	-0.159911	-0.150985	-0.145907	-0.142852	-0.15869
	4.3	0.091731	0.315469	0.083465	0.145932	0.082193	0.439609	-0.151759	-0.155441	-0.145484	-0.14482	-0.139419	-0.157163
	4.4	0.093667	0.333941	0.103973	0.167427	0.090235	0.449721	-0.150148	-0.151798	-0.143368	-0.142272	-0.141117	-0.153899
	4.5	0.097588	0.374109	0.122209	0.193841	0.103579	0.471428	-0.14698	-0.149452	-0.141014	-0.145272	-0.138009	-0.150072
	4.6	0.104889	0.42436	0.143097	0.218601	0.115984	0.481447	-0.14516	-0.146793	-0.134642	-0.138883	-0.135739	-0.146334
	4.7	0.117228	0.437009	0.18412	0.244899	0.131743	0.49101	-0.144849	-0.144518	-0.131962	-0.136998	-0.136111	-0.148936
	4.8	0.135528	0.442712	0.222289	0.258223	0.151403	0.500301	-0.139669	-0.141768	-0.131137	-0.135728	-0.133877	-0.1452
	4.9	0.176364	0.440744	0.237464	0.285462	0.163399	0.50662	-0.136883	-0.140624	-0.127494	-0.133528	-0.129829	-0.141351
	5	0.204402	0.432433	0.250984	0.302868	0.185091	0.51425	-0.137623	-0.137398	-0.126283	-0.132419	-0.128914	-0.140494
	5.1	0.21645	0.431443	0.274311	0.322782	0.196089	0.519469	-0.131878	-0.134615	-0.125595	-0.131643	-0.127068	-0.139213
	5.2	0.226037	0.421147	0.291163	0.347158	0.20859	0.533328	-0.130972	-0.132181	-0.121255	-0.130711	-0.124897	-0.138741
	5.3	0.237968	0.420966	0.304642	0.36735	0.220829	0.54493	-0.128325	-0.129523	-0.117321	-0.127135	-0.121752	-0.137065
	5.4	0.249348	0.415635	0.321956	0.3837	0.241249	0.55943	-0.127616	-0.128164	-0.114004	-0.128836	-0.125783	-0.134817
	5.5	0.264103	0.407283	0.335631	0.400605	0.259647	0.574703	-0.125	-0.126959	-0.112258	-0.127834	-0.12577	-0.13262
	5.6	0.280202	0.407197	0.348609	0.414243	0.270322	0.590824	-0.122949	-0.124781	-0.107789	-0.12631	-0.120792	-0.131951
	5.7	0.29692	0.408047	0.372325	0.428669	0.278769	0.600024	-0.122817	-0.122198	-0.106404	-0.124748	-0.121541	-0.127904
	5.8	0.314016	0.408855	0.396439	0.443736	0.286562	0.615931	-0.121611	-0.120448	-0.104331	-0.123022	-0.120533	-0.126026
	5.9	0.331073	0.406589	0.407103	0.454355	0.287366	0.633599	-0.11947	-0.122035	-0.101984	-0.123364	-0.119101	-0.12417
	6	0.344755	0.418115	0.412813	0.465321	0.30339	0.64766	-0.11867	-0.121271	-0.103362	-0.122487	-0.117928	-0.120648
	6.1	0.361141	0.421492	0.421463	0.472131	0.320105	0.664039	-0.114626	-0.117358	-0.10143	-0.120693	-0.115286	-0.119338
	6.2	0.379498	0.464679	0.421885	0.48136	0.331886	0.684323	-0.115203	-0.11682	-0.0995136	-0.120804	-0.116273	-0.120182
	6.3	0.400218	0.481032	0.433468	0.4944	0.339795	0.695972	-0.115654	-0.117814	-0.101209	-0.118772	-0.113652	-0.117489
	6.4	0.417686	0.489291	0.438469	0.504274	0.346675	0.702757	-0.1138	-0.114924	-0.100318	-0.12048	-0.115396	-0.119569
	6.5	0.432398	0.495814	0.447282	0.512668	0.361314	0.719089	-0.111348	-0.113556	-0.0974988	-0.118924	-0.11261	-0.118395
	6.6	0.449915	0.501544	0.450879	0.521419	0.367865	0.731181	-0.11242	-0.112003	-0.0986504	-0.118836	-0.112674	-0.115893
	6.7	0.464405	0.508382	0.462727	0.522651	0.362958	0.734859	-0.113505	-0.110718	-0.0983708	-0.116086	-0.115906	-0.113821
	6.8	0.477718	0.518388	0.463536	0.525671	0.366786	0.746843	-0.110149	-0.10971	-0.0988095	-0.114564	-0.114398	-0.111108
	6.9	0.490181	0.520513	0.468829	0.529662	0.376694	0.753219	-0.109584	-0.109929	-0.0954627	-0.115936	-0.113459	-0.111196
	7	0.513237	0.53419	0.477879	0.534643	0.379042	0.762269	-0.108239	-0.10957	-0.0977588	-0.114438	-0.112613	-0.110633
	7.1	0.55165	0.537351	0.482329	0.538484	0.390799	0.764913	-0.106944	-0.105974	-0.095122	-0.114022	-0.110344	-0.108534
	7.2	0.556416	0.543887	0.489927	0.546911	0.392038	0.76765	-0.106031	-0.105537	-0.0970604	-0.113844	-0.111584	-0.108656
	7.3	0.556312	0.555648	0.496582	0.550936	0.400043	0.774482	-0.105937	-0.102829	-0.0952073	-0.115884	-0.110636	-0.106134
	7.4	0.552515	0.567194	0.548818	0.555462	0.408235	0.777592	-0.105138	-0.101929	-0.0946504	-0.112201	-0.110224	-0.104635
	7.5	0.546256	0.577893	0.57736	0.561985	0.415779	0.765098	-0.105918	-0.100247	-0.0946252	-0.112149	-0.109705	-0.102542
	7.6	0.540171	0.581296	0.58104	0.568004	0.418969	0.769643	-0.103592	-0.103696	-0.0946838	-0.114064	-0.111105	-0.101113
	7.7	0.535196	0.583585	0.568545	0.571271	0.419192	0.779098	-0.102178	-0.102174	-0.0931336	-0.114399	-0.110275	-0.105488
	7.8	0.528597	0.588986	0.566088	0.57258	0.430561	0.78564	-0.101868	-0.0994788	-0.0911803	-0.114566	-0.107714	-0.103578
	7.9	0.527344	0.587127	0.5535	0.576084	0.437783	0.790393	-0.102293	-0.0999157	-0.0934964	-0.109966	-0.106964	-0.104142
	8	0.523507	0.593543	0.543279	0.577384	0.436023	0.788096	-0.103707	-0.098916	-0.0914581	-0.110762	-0.104297	-0.10301
	8.1	0.522243	0.597726	0.536062	0.57372	0.437836	0.789959	-0.101754	-0.0983555	-0.0902402	-0.111013	-0.106245	-0.101519
	8.2	0.521631	0.598614	0.52864	0.573623	0.438922	0.800125	-0.101544	-0.0984834	-0.0903121	-0.110315	-0.107115	-0.101747
	8.3	0.518719	0.598413	0.521558	0.571455	0.438749	0.807978	-0.0999997	-0.0965853	-0.0924009	-0.111718	-0.103829	-0.101838
	8.4	0.519503	0.603158	0.513061	0.574628	0.440801	0.806795	-0.0992861	-0.0930923	-0.0897971	-0.109821	-0.104375	-0.103842
	8.5	0.518315	0.608293	0.513606	0.569367	0.4367	0.807152	-0.0999832	-0.0957561	-0.0897579	-0.109335	-0.104731	-0.103279
	8.6	0.517133	0.603122	0.512108	0.570042	0.443251	0.806552	-0.0971807	-0.094134	-0.0888637	-0.108049	-0.105838	-0.107539
	8.7	0.518201	0.60881	0.506947	0.560633	0.435857	0.806055	-0.099156	-0.0944515	-0.0895377	-0.112899	-0.106366	-0.104556
	8.8	0.519325	0.609097	0.507719	0.55431	0.424342	0.802007	-0.0973729	-0.0930914	-0.0900682	-0.108267	-0.106104	-0.103333
	8.9	0.521088	0.610936	0.509077	0.534215	0.405774	0.786323	-0.0979033	-0.0923032	-0.0873372	-0.10756	-0.1049	-0.103276
	9	0.522736	0.614347	0.507322	0.521195	0.391287	0.769146	-0.0967842	-0.0915219	-0.0882868	-0.110291	-0.105445	-0.101836
	9.1	0.524006	0.604073	0.502352	0.507564	0.373387	0.754549	-0.0978869	-0.0913902	-0.0875261	-0.109658	-0.104058	-0.101605
	9.2	0.525594	0.604065	0.498917	0.494764	0.364273	0.734419	-0.0969781	-0.0870624	-0.0855162	-0.108836	-0.102075	-0.103331
	9.3	0.526099	0.600208	0.490027	0.479353	0.343925	0.719478	-0.0955315	-0.0865612	-0.0876034	-0.108278	-0.104813	-0.103325
	9.4	0.526649	0.600585	0.489409	0.469993	0.327433	0.704103	-0.0949497	-0.0814691	-0.0849028	-0.108349	-0.105538	-0.103638
	9.5	0.529324	0.598291	0.488658	0.45856	0.315519	0.695283	-0.0939732	-0.0813661	-0.0862318	-0.111433	-0.106726	-0.105375
	9.6	0.531423	0.59758	0.481571	0.448426	0.308812	0.682113	-0.095416	-0.082185	-0.0840581	-0.109474	-0.10488	-0.102564
	9.7	0.530368	0.597498	0.484468	0.436572	0.295607	0.671896	-0.0943552	-0.0831189	-0.0854044	-0.1085	-0.10422	-0.103718
	9.8	0.529804	0.594658	0.480317	0.426351	0.284484	0.660939	-0.0969518	-0.0843576	-0.0850407	-0.107551	-0.105522	-0.104965
	9.9	0.528321	0.598198	0.483645	0.41649	0.267337	0.652247	-0.0946195	-0.0857448	-0.0860586	-0.107506	-0.105412	-0.102294
	10	0.52845	0.605292	0.47411	0.407883	0.25824	0.644084	-0.0941828	-0.0843948	-0.0862474	-0.104527	-0.104969	-0.102586
