# Supplementary material for: Optogenetic manipulation of Gq- and Gi/o-coupled receptor signaling in neurons and heart muscle cells
Source: eLife. 2023 Aug 17;12:e83974. doi: 10.7554/eLife.83974 (PMC10435233; doi:10.7554/eLife.83974)
Supplement: Figure 4—figure supplement 1—source data 1. [file elife-83974-fig4-figsupp1-data1.xlsx]

## Sheet: A
Line	sample	trial	time (ms)	Rerative heart beat
MosOpn3	1	1	-9500	0.714286
MosOpn3	1	1	-9400	0.714286
MosOpn3	1	1	-9300	0.714286
MosOpn3	1	1	-9200	0.714286
MosOpn3	1	1	-9100	0.952381
MosOpn3	1	1	-9000	0.952381
MosOpn3	1	1	-8900	1.19048
MosOpn3	1	1	-8800	0.952381
MosOpn3	1	1	-8700	1.19048
MosOpn3	1	1	-8600	0.952381
MosOpn3	1	1	-8500	1.19048
MosOpn3	1	1	-8400	0.952381
MosOpn3	1	1	-8300	0.952381
MosOpn3	1	1	-8200	1.19048
MosOpn3	1	1	-8100	1.19048
MosOpn3	1	1	-8000	1.19048
MosOpn3	1	1	-7900	1.19048
MosOpn3	1	1	-7800	1.19048
MosOpn3	1	1	-7700	0.952381
MosOpn3	1	1	-7600	0.952381
MosOpn3	1	1	-7500	0.952381
MosOpn3	1	1	-7400	0.952381
MosOpn3	1	1	-7300	1.19048
MosOpn3	1	1	-7200	0.952381
MosOpn3	1	1	-7100	0.952381
MosOpn3	1	1	-7000	0.952381
MosOpn3	1	1	-6900	0.952381
MosOpn3	1	1	-6800	0.952381
MosOpn3	1	1	-6700	0.952381
MosOpn3	1	1	-6600	1.19048
MosOpn3	1	1	-6500	0.952381
MosOpn3	1	1	-6400	1.19048
MosOpn3	1	1	-6300	0.952381
MosOpn3	1	1	-6200	1.19048
MosOpn3	1	1	-6100	0.952381
MosOpn3	1	1	-6000	0.952381
MosOpn3	1	1	-5900	0.952381
MosOpn3	1	1	-5800	0.952381
MosOpn3	1	1	-5700	1.19048
MosOpn3	1	1	-5600	0.952381
MosOpn3	1	1	-5500	1.19048
MosOpn3	1	1	-5400	0.952381
MosOpn3	1	1	-5300	0.952381
MosOpn3	1	1	-5200	0.952381
MosOpn3	1	1	-5100	0.952381
MosOpn3	1	1	-5000	1.19048
MosOpn3	1	1	-4900	0.952381
MosOpn3	1	1	-4800	1.19048
MosOpn3	1	1	-4700	0.952381
MosOpn3	1	1	-4600	1.19048
MosOpn3	1	1	-4500	0.952381
MosOpn3	1	1	-4400	0.952381
MosOpn3	1	1	-4300	1.19048
MosOpn3	1	1	-4200	0.952381
MosOpn3	1	1	-4100	1.19048
MosOpn3	1	1	-4000	0.952381
MosOpn3	1	1	-3900	1.19048
MosOpn3	1	1	-3800	0.952381
MosOpn3	1	1	-3700	0.952381
MosOpn3	1	1	-3600	0.952381
MosOpn3	1	1	-3500	0.952381
MosOpn3	1	1	-3400	1.19048
MosOpn3	1	1	-3300	0.952381
MosOpn3	1	1	-3200	1.19048
MosOpn3	1	1	-3100	0.952381
MosOpn3	1	1	-3000	1.19048
MosOpn3	1	1	-2900	0.952381
MosOpn3	1	1	-2800	0.952381
MosOpn3	1	1	-2700	1.19048
MosOpn3	1	1	-2600	0.952381
MosOpn3	1	1	-2500	1.19048
MosOpn3	1	1	-2400	0.952381
MosOpn3	1	1	-2300	0.952381
MosOpn3	1	1	-2200	0.952381
MosOpn3	1	1	-2100	0.952381
MosOpn3	1	1	-2000	0.952381
MosOpn3	1	1	-1900	0.952381
MosOpn3	1	1	-1800	1.19048
MosOpn3	1	1	-1700	0.952381
MosOpn3	1	1	-1600	1.19048
MosOpn3	1	1	-1500	0.952381
MosOpn3	1	1	-1400	1.19048
MosOpn3	1	1	-1300	1.19048
MosOpn3	1	1	-1200	0.952381
MosOpn3	1	1	-1100	1.19048
MosOpn3	1	1	-1000	0.952381
MosOpn3	1	1	-900	1.19048
MosOpn3	1	1	-800	0.952381
MosOpn3	1	1	-700	1.19048
MosOpn3	1	1	-600	0.952381
MosOpn3	1	1	-500	0.952381
MosOpn3	1	1	-400	0.952381
MosOpn3	1	1	-300	0.952381
MosOpn3	1	1	-200	1.19048
MosOpn3	1	1	-100	0.952381
MosOpn3	1	1	0	0.952381
MosOpn3	1	1	100	0.714286
MosOpn3	1	1	200	0.714286
MosOpn3	1	1	300	0.47619
MosOpn3	1	1	400	0.47619
MosOpn3	1	1	500	0.47619
MosOpn3	1	1	600	0.238095
MosOpn3	1	1	700	0.238095
MosOpn3	1	1	800	0
MosOpn3	1	1	900	0
MosOpn3	1	1	1000	0
MosOpn3	1	1	1100	0
MosOpn3	1	1	1200	0
MosOpn3	1	1	1300	0
MosOpn3	1	1	1400	0
MosOpn3	1	1	1500	0
MosOpn3	1	1	1600	0
MosOpn3	1	1	1700	0
MosOpn3	1	1	1800	0
MosOpn3	1	1	1900	0
MosOpn3	1	1	2000	0
MosOpn3	1	1	2100	0
MosOpn3	1	1	2200	0
MosOpn3	1	1	2300	0
MosOpn3	1	1	2400	0
MosOpn3	1	1	2500	0
MosOpn3	1	1	2600	0
MosOpn3	1	1	2700	0
MosOpn3	1	1	2800	0
MosOpn3	1	1	2900	0
MosOpn3	1	1	3000	0
MosOpn3	1	1	3100	0
MosOpn3	1	1	3200	0
MosOpn3	1	1	3300	0
MosOpn3	1	1	3400	0
MosOpn3	1	1	3500	0
MosOpn3	1	1	3600	0
MosOpn3	1	1	3700	0
MosOpn3	1	1	3800	0
MosOpn3	1	1	3900	0
MosOpn3	1	1	4000	0
MosOpn3	1	1	4100	0
MosOpn3	1	1	4200	0
MosOpn3	1	1	4300	0
MosOpn3	1	1	4400	0
MosOpn3	1	1	4500	0
MosOpn3	1	1	4600	0
MosOpn3	1	1	4700	0
MosOpn3	1	1	4800	0
MosOpn3	1	1	4900	0
MosOpn3	1	1	5000	0
MosOpn3	1	1	5100	0
MosOpn3	1	1	5200	0
MosOpn3	1	1	5300	0
MosOpn3	1	1	5400	0
MosOpn3	1	1	5500	0
MosOpn3	1	1	5600	0
MosOpn3	1	1	5700	0
MosOpn3	1	1	5800	0
MosOpn3	1	1	5900	0
MosOpn3	1	1	6000	0
MosOpn3	1	1	6100	0
MosOpn3	1	1	6200	0
MosOpn3	1	1	6300	0
MosOpn3	1	1	6400	0
MosOpn3	1	1	6500	0
MosOpn3	1	1	6600	0
MosOpn3	1	1	6700	0
MosOpn3	1	1	6800	0
MosOpn3	1	1	6900	0
MosOpn3	1	1	7000	0
MosOpn3	1	1	7100	0
MosOpn3	1	1	7200	0
MosOpn3	1	1	7300	0
MosOpn3	1	1	7400	0
MosOpn3	1	1	7500	0
MosOpn3	1	1	7600	0
MosOpn3	1	1	7700	0
MosOpn3	1	1	7800	0
MosOpn3	1	1	7900	0
MosOpn3	1	1	8000	0
MosOpn3	1	1	8100	0
MosOpn3	1	1	8200	0
MosOpn3	1	1	8300	0
MosOpn3	1	1	8400	0
MosOpn3	1	1	8500	0
MosOpn3	1	1	8600	0
MosOpn3	1	1	8700	0.238095
MosOpn3	1	1	8800	0.238095
MosOpn3	1	1	8900	0.238095
MosOpn3	1	1	9000	0.238095
MosOpn3	1	1	9100	0.238095
MosOpn3	1	1	9200	0.238095
MosOpn3	1	1	9300	0.238095
MosOpn3	1	1	9400	0.238095
MosOpn3	1	1	9500	0.238095
MosOpn3	1	1	9600	0.238095
MosOpn3	1	1	9700	0
MosOpn3	1	1	9800	0
MosOpn3	1	1	9900	0
MosOpn3	1	1	10000	0
MosOpn3	1	1	10100	0
MosOpn3	1	1	10200	0
MosOpn3	1	1	10300	0
MosOpn3	1	1	10400	0
MosOpn3	1	1	10500	0
MosOpn3	1	1	10600	0
MosOpn3	1	1	10700	0
MosOpn3	1	1	10800	0
MosOpn3	1	1	10900	0
MosOpn3	1	1	11000	0
MosOpn3	1	1	11100	0
MosOpn3	1	1	11200	0
MosOpn3	1	1	11300	0
MosOpn3	1	1	11400	0
MosOpn3	1	1	11500	0
MosOpn3	1	1	11600	0.238095
MosOpn3	1	1	11700	0.238095
MosOpn3	1	1	11800	0.238095
MosOpn3	1	1	11900	0.238095
MosOpn3	1	1	12000	0.238095
MosOpn3	1	1	12100	0.238095
MosOpn3	1	1	12200	0.238095
MosOpn3	1	1	12300	0.238095
MosOpn3	1	1	12400	0.238095
MosOpn3	1	1	12500	0.238095
MosOpn3	1	1	12600	0
MosOpn3	1	1	12700	0
MosOpn3	1	1	12800	0
MosOpn3	1	1	12900	0
MosOpn3	1	1	13000	0
MosOpn3	1	1	13100	0
MosOpn3	1	1	13200	0
MosOpn3	1	1	13300	0
MosOpn3	1	1	13400	0
MosOpn3	1	1	13500	0
MosOpn3	1	1	13600	0
MosOpn3	1	1	13700	0
MosOpn3	1	1	13800	0
MosOpn3	1	1	13900	0
MosOpn3	1	1	14000	0
MosOpn3	1	1	14100	0
MosOpn3	1	1	14200	0
MosOpn3	1	1	14300	0
MosOpn3	1	1	14400	0
MosOpn3	1	1	14500	0
MosOpn3	1	1	14600	0.238095
MosOpn3	1	1	14700	0.238095
MosOpn3	1	1	14800	0.238095
MosOpn3	1	1	14900	0.238095
MosOpn3	1	1	15000	0.238095
MosOpn3	1	1	15100	0.238095
MosOpn3	1	1	15200	0.238095
MosOpn3	1	1	15300	0.238095
MosOpn3	1	1	15400	0.238095
MosOpn3	1	1	15500	0.47619
MosOpn3	1	1	15600	0.238095
MosOpn3	1	1	15700	0.238095
MosOpn3	1	1	15800	0.238095
MosOpn3	1	1	15900	0.238095
MosOpn3	1	1	16000	0.238095
MosOpn3	1	1	16100	0.47619
MosOpn3	1	1	16200	0.47619
MosOpn3	1	1	16300	0.47619
MosOpn3	1	1	16400	0.47619
MosOpn3	1	1	16500	0.238095
MosOpn3	1	1	16600	0.238095
MosOpn3	1	1	16700	0.47619
MosOpn3	1	1	16800	0.47619
MosOpn3	1	1	16900	0.47619
MosOpn3	1	1	17000	0.47619
MosOpn3	1	1	17100	0.238095
MosOpn3	1	1	17200	0.238095
MosOpn3	1	1	17300	0.47619
MosOpn3	1	1	17400	0.47619
MosOpn3	1	1	17500	0.47619
MosOpn3	1	1	17600	0.714286
MosOpn3	1	1	17700	0.47619
MosOpn3	1	1	17800	0.47619
MosOpn3	1	1	17900	0.47619
MosOpn3	1	1	18000	0.47619
MosOpn3	1	1	18100	0.47619
MosOpn3	1	1	18200	0.47619
MosOpn3	1	1	18300	0.238095
MosOpn3	1	1	18400	0.238095
MosOpn3	1	1	18500	0.238095
MosOpn3	1	1	18600	0.238095
MosOpn3	1	1	18700	0.238095
MosOpn3	1	1	18800	0.238095
MosOpn3	1	1	18900	0.238095
MosOpn3	1	1	19000	0.238095
MosOpn3	1	1	19100	0.238095
MosOpn3	1	1	19200	0.47619
MosOpn3	1	1	19300	0.47619
MosOpn3	1	1	19400	0.47619
MosOpn3	1	1	19500	0.47619
MosOpn3	1	1	19600	0.238095
MosOpn3	1	1	19700	0.238095
MosOpn3	1	1	19800	0.238095
MosOpn3	1	1	19900	0.238095
MosOpn3	2	1	-9500	0.769231
MosOpn3	2	1	-9400	0.512821
MosOpn3	2	1	-9300	0.769231
MosOpn3	2	1	-9200	0.769231
MosOpn3	2	1	-9100	0.769231
MosOpn3	2	1	-9000	0.769231
MosOpn3	2	1	-8900	0.769231
MosOpn3	2	1	-8800	1.02564
MosOpn3	2	1	-8700	1.02564
MosOpn3	2	1	-8600	1.02564
MosOpn3	2	1	-8500	1.02564
MosOpn3	2	1	-8400	1.02564
MosOpn3	2	1	-8300	1.02564
MosOpn3	2	1	-8200	1.02564
MosOpn3	2	1	-8100	1.02564
MosOpn3	2	1	-8000	1.02564
MosOpn3	2	1	-7900	1.02564
MosOpn3	2	1	-7800	1.02564
MosOpn3	2	1	-7700	1.02564
MosOpn3	2	1	-7600	1.02564
MosOpn3	2	1	-7500	1.02564
MosOpn3	2	1	-7400	1.02564
MosOpn3	2	1	-7300	1.02564
MosOpn3	2	1	-7200	1.02564
MosOpn3	2	1	-7100	1.02564
MosOpn3	2	1	-7000	1.02564
MosOpn3	2	1	-6900	1.02564
MosOpn3	2	1	-6800	1.02564
MosOpn3	2	1	-6700	1.02564
MosOpn3	2	1	-6600	1.02564
MosOpn3	2	1	-6500	1.02564
MosOpn3	2	1	-6400	1.02564
MosOpn3	2	1	-6300	1.02564
MosOpn3	2	1	-6200	1.02564
MosOpn3	2	1	-6100	1.02564
MosOpn3	2	1	-6000	1.02564
MosOpn3	2	1	-5900	1.02564
MosOpn3	2	1	-5800	1.02564
MosOpn3	2	1	-5700	1.02564
MosOpn3	2	1	-5600	0.769231
MosOpn3	2	1	-5500	1.02564
MosOpn3	2	1	-5400	1.02564
MosOpn3	2	1	-5300	1.02564
MosOpn3	2	1	-5200	1.02564
MosOpn3	2	1	-5100	0.769231
MosOpn3	2	1	-5000	1.02564
MosOpn3	2	1	-4900	1.02564
MosOpn3	2	1	-4800	1.02564
MosOpn3	2	1	-4700	1.02564
MosOpn3	2	1	-4600	1.02564
MosOpn3	2	1	-4500	1.02564
MosOpn3	2	1	-4400	1.02564
MosOpn3	2	1	-4300	1.02564
MosOpn3	2	1	-4200	1.02564
MosOpn3	2	1	-4100	1.02564
MosOpn3	2	1	-4000	1.02564
MosOpn3	2	1	-3900	1.02564
MosOpn3	2	1	-3800	1.02564
MosOpn3	2	1	-3700	1.02564
MosOpn3	2	1	-3600	1.02564
MosOpn3	2	1	-3500	1.02564
MosOpn3	2	1	-3400	1.02564
MosOpn3	2	1	-3300	1.02564
MosOpn3	2	1	-3200	1.02564
MosOpn3	2	1	-3100	1.02564
MosOpn3	2	1	-3000	1.02564
MosOpn3	2	1	-2900	1.02564
MosOpn3	2	1	-2800	1.02564
MosOpn3	2	1	-2700	1.02564
MosOpn3	2	1	-2600	1.02564
MosOpn3	2	1	-2500	1.02564
MosOpn3	2	1	-2400	1.02564
MosOpn3	2	1	-2300	1.02564
MosOpn3	2	1	-2200	1.02564
MosOpn3	2	1	-2100	1.02564
MosOpn3	2	1	-2000	1.02564
MosOpn3	2	1	-1900	1.02564
MosOpn3	2	1	-1800	1.02564
MosOpn3	2	1	-1700	1.02564
MosOpn3	2	1	-1600	1.02564
MosOpn3	2	1	-1500	1.02564
MosOpn3	2	1	-1400	1.02564
MosOpn3	2	1	-1300	1.02564
MosOpn3	2	1	-1200	1.02564
MosOpn3	2	1	-1100	1.02564
MosOpn3	2	1	-1000	1.02564
MosOpn3	2	1	-900	1.02564
MosOpn3	2	1	-800	1.02564
MosOpn3	2	1	-700	1.02564
MosOpn3	2	1	-600	1.02564
MosOpn3	2	1	-500	1.02564
MosOpn3	2	1	-400	1.02564
MosOpn3	2	1	-300	1.02564
MosOpn3	2	1	-200	1.02564
MosOpn3	2	1	-100	1.02564
MosOpn3	2	1	0	0.769231
MosOpn3	2	1	100	1.02564
MosOpn3	2	1	200	0.769231
MosOpn3	2	1	300	0.769231
MosOpn3	2	1	400	1.02564
MosOpn3	2	1	500	0.769231
MosOpn3	2	1	600	0.769231
MosOpn3	2	1	700	0.512821
MosOpn3	2	1	800	0.512821
MosOpn3	2	1	900	0.512821
MosOpn3	2	1	1000	0.512821
MosOpn3	2	1	1100	0.25641
MosOpn3	2	1	1200	0.25641
MosOpn3	2	1	1300	0.25641
MosOpn3	2	1	1400	0
MosOpn3	2	1	1500	0
MosOpn3	2	1	1600	0
MosOpn3	2	1	1700	0
MosOpn3	2	1	1800	0
MosOpn3	2	1	1900	0
MosOpn3	2	1	2000	0
MosOpn3	2	1	2100	0
MosOpn3	2	1	2200	0
MosOpn3	2	1	2300	0
MosOpn3	2	1	2400	0
MosOpn3	2	1	2500	0
MosOpn3	2	1	2600	0
MosOpn3	2	1	2700	0
MosOpn3	2	1	2800	0
MosOpn3	2	1	2900	0
MosOpn3	2	1	3000	0
MosOpn3	2	1	3100	0
MosOpn3	2	1	3200	0
MosOpn3	2	1	3300	0
MosOpn3	2	1	3400	0
MosOpn3	2	1	3500	0
MosOpn3	2	1	3600	0
MosOpn3	2	1	3700	0
MosOpn3	2	1	3800	0
MosOpn3	2	1	3900	0
MosOpn3	2	1	4000	0
MosOpn3	2	1	4100	0
MosOpn3	2	1	4200	0
MosOpn3	2	1	4300	0
MosOpn3	2	1	4400	0
MosOpn3	2	1	4500	0
MosOpn3	2	1	4600	0
MosOpn3	2	1	4700	0
MosOpn3	2	1	4800	0
MosOpn3	2	1	4900	0.25641
MosOpn3	2	1	5000	0.25641
MosOpn3	2	1	5100	0.25641
MosOpn3	2	1	5200	0.25641
MosOpn3	2	1	5300	0.25641
MosOpn3	2	1	5400	0.25641
MosOpn3	2	1	5500	0.25641
MosOpn3	2	1	5600	0.25641
MosOpn3	2	1	5700	0.25641
MosOpn3	2	1	5800	0.25641
MosOpn3	2	1	5900	0
MosOpn3	2	1	6000	0
MosOpn3	2	1	6100	0
MosOpn3	2	1	6200	0
MosOpn3	2	1	6300	0
MosOpn3	2	1	6400	0
MosOpn3	2	1	6500	0
MosOpn3	2	1	6600	0
MosOpn3	2	1	6700	0
MosOpn3	2	1	6800	0
MosOpn3	2	1	6900	0
MosOpn3	2	1	7000	0
MosOpn3	2	1	7100	0
MosOpn3	2	1	7200	0
MosOpn3	2	1	7300	0
MosOpn3	2	1	7400	0
MosOpn3	2	1	7500	0.25641
MosOpn3	2	1	7600	0.25641
MosOpn3	2	1	7700	0.25641
MosOpn3	2	1	7800	0.25641
MosOpn3	2	1	7900	0.25641
MosOpn3	2	1	8000	0.25641
MosOpn3	2	1	8100	0.25641
MosOpn3	2	1	8200	0.25641
MosOpn3	2	1	8300	0.25641
MosOpn3	2	1	8400	0.25641
MosOpn3	2	1	8500	0
MosOpn3	2	1	8600	0
MosOpn3	2	1	8700	0
MosOpn3	2	1	8800	0
MosOpn3	2	1	8900	0
MosOpn3	2	1	9000	0
MosOpn3	2	1	9100	0
MosOpn3	2	1	9200	0
MosOpn3	2	1	9300	0
MosOpn3	2	1	9400	0.25641
MosOpn3	2	1	9500	0.25641
MosOpn3	2	1	9600	0.25641
MosOpn3	2	1	9700	0.25641
MosOpn3	2	1	9800	0.25641
MosOpn3	2	1	9900	0.25641
MosOpn3	2	1	10000	0.25641
MosOpn3	2	1	10100	0.25641
MosOpn3	2	1	10200	0.25641
MosOpn3	2	1	10300	0.25641
MosOpn3	2	1	10400	0
MosOpn3	2	1	10500	0
MosOpn3	2	1	10600	0
MosOpn3	2	1	10700	0
MosOpn3	2	1	10800	0
MosOpn3	2	1	10900	0
MosOpn3	2	1	11000	0
MosOpn3	2	1	11100	0.25641
MosOpn3	2	1	11200	0.25641
MosOpn3	2	1	11300	0.25641
MosOpn3	2	1	11400	0.25641
MosOpn3	2	1	11500	0.25641
MosOpn3	2	1	11600	0.25641
MosOpn3	2	1	11700	0.25641
MosOpn3	2	1	11800	0.25641
MosOpn3	2	1	11900	0.25641
MosOpn3	2	1	12000	0.25641
MosOpn3	2	1	12100	0
MosOpn3	2	1	12200	0
MosOpn3	2	1	12300	0
MosOpn3	2	1	12400	0.25641
MosOpn3	2	1	12500	0.25641
MosOpn3	2	1	12600	0.25641
MosOpn3	2	1	12700	0.25641
MosOpn3	2	1	12800	0.25641
MosOpn3	2	1	12900	0.25641
MosOpn3	2	1	13000	0.25641
MosOpn3	2	1	13100	0.25641
MosOpn3	2	1	13200	0.25641
MosOpn3	2	1	13300	0.25641
MosOpn3	2	1	13400	0
MosOpn3	2	1	13500	0
MosOpn3	2	1	13600	0
MosOpn3	2	1	13700	0.25641
MosOpn3	2	1	13800	0.25641
MosOpn3	2	1	13900	0.25641
MosOpn3	2	1	14000	0.25641
MosOpn3	2	1	14100	0.25641
MosOpn3	2	1	14200	0.25641
MosOpn3	2	1	14300	0.25641
MosOpn3	2	1	14400	0.25641
MosOpn3	2	1	14500	0.25641
MosOpn3	2	1	14600	0.25641
MosOpn3	2	1	14700	0
MosOpn3	2	1	14800	0
MosOpn3	2	1	14900	0.25641
MosOpn3	2	1	15000	0.25641
MosOpn3	2	1	15100	0.25641
MosOpn3	2	1	15200	0.25641
MosOpn3	2	1	15300	0.25641
MosOpn3	2	1	15400	0.25641
MosOpn3	2	1	15500	0.25641
MosOpn3	2	1	15600	0.25641
MosOpn3	2	1	15700	0.25641
MosOpn3	2	1	15800	0.25641
MosOpn3	2	1	15900	0.25641
MosOpn3	2	1	16000	0.25641
MosOpn3	2	1	16100	0.25641
MosOpn3	2	1	16200	0.25641
MosOpn3	2	1	16300	0.25641
MosOpn3	2	1	16400	0.25641
MosOpn3	2	1	16500	0.25641
MosOpn3	2	1	16600	0.25641
MosOpn3	2	1	16700	0.25641
MosOpn3	2	1	16800	0.25641
MosOpn3	2	1	16900	0
MosOpn3	2	1	17000	0.25641
MosOpn3	2	1	17100	0.25641
MosOpn3	2	1	17200	0.25641
MosOpn3	2	1	17300	0.512821
MosOpn3	2	1	17400	0.512821
MosOpn3	2	1	17500	0.512821
MosOpn3	2	1	17600	0.512821
MosOpn3	2	1	17700	0.769231
MosOpn3	2	1	17800	0.769231
MosOpn3	2	1	17900	1.02564
MosOpn3	2	1	18000	0.769231
MosOpn3	2	1	18100	0.769231
MosOpn3	2	1	18200	0.769231
MosOpn3	2	1	18300	0.512821
MosOpn3	2	1	18400	0.512821
MosOpn3	2	1	18500	0.512821
MosOpn3	2	1	18600	0.769231
MosOpn3	2	1	18700	0.512821
MosOpn3	2	1	18800	0.512821
MosOpn3	2	1	18900	0.25641
MosOpn3	2	1	19000	0.25641
MosOpn3	2	1	19100	0.25641
MosOpn3	2	1	19200	0.25641
MosOpn3	2	1	19300	0.25641
MosOpn3	2	1	19400	0.25641
MosOpn3	2	1	19500	0.25641
MosOpn3	2	1	19600	0
MosOpn3	2	1	19700	0
MosOpn3	2	1	19800	0.25641
MosOpn3	2	1	19900	0.25641
MosOpn3	3	1	-9500	0.9375
MosOpn3	3	1	-9400	0.625
MosOpn3	3	1	-9300	0.9375
MosOpn3	3	1	-9200	0.9375
MosOpn3	3	1	-9100	0.9375
MosOpn3	3	1	-9000	0.9375
MosOpn3	3	1	-8900	1.25
MosOpn3	3	1	-8800	1.25
MosOpn3	3	1	-8700	1.25
MosOpn3	3	1	-8600	1.25
MosOpn3	3	1	-8500	1.25
MosOpn3	3	1	-8400	1.25
MosOpn3	3	1	-8300	1.25
MosOpn3	3	1	-8200	1.5625
MosOpn3	3	1	-8100	1.5625
MosOpn3	3	1	-8000	1.25
MosOpn3	3	1	-7900	1.25
MosOpn3	3	1	-7800	1.25
MosOpn3	3	1	-7700	1.25
MosOpn3	3	1	-7600	1.25
MosOpn3	3	1	-7500	1.25
MosOpn3	3	1	-7400	1.25
MosOpn3	3	1	-7300	0.9375
MosOpn3	3	1	-7200	0.9375
MosOpn3	3	1	-7100	0.9375
MosOpn3	3	1	-7000	0.9375
MosOpn3	3	1	-6900	0.9375
MosOpn3	3	1	-6800	0.9375
MosOpn3	3	1	-6700	0.9375
MosOpn3	3	1	-6600	0.9375
MosOpn3	3	1	-6500	0.9375
MosOpn3	3	1	-6400	0.9375
MosOpn3	3	1	-6300	0.9375
MosOpn3	3	1	-6200	0.9375
MosOpn3	3	1	-6100	0.9375
MosOpn3	3	1	-6000	0.9375
MosOpn3	3	1	-5900	0.9375
MosOpn3	3	1	-5800	0.9375
MosOpn3	3	1	-5700	0.9375
MosOpn3	3	1	-5600	0.625
MosOpn3	3	1	-5500	0.9375
MosOpn3	3	1	-5400	0.9375
MosOpn3	3	1	-5300	0.9375
MosOpn3	3	1	-5200	0.9375
MosOpn3	3	1	-5100	0.9375
MosOpn3	3	1	-5000	0.9375
MosOpn3	3	1	-4900	0.9375
MosOpn3	3	1	-4800	0.9375
MosOpn3	3	1	-4700	0.9375
MosOpn3	3	1	-4600	0.9375
MosOpn3	3	1	-4500	0.9375
MosOpn3	3	1	-4400	0.9375
MosOpn3	3	1	-4300	0.9375
MosOpn3	3	1	-4200	0.9375
MosOpn3	3	1	-4100	0.9375
MosOpn3	3	1	-4000	0.9375
MosOpn3	3	1	-3900	0.9375
MosOpn3	3	1	-3800	0.9375
MosOpn3	3	1	-3700	0.9375
MosOpn3	3	1	-3600	0.9375
MosOpn3	3	1	-3500	0.9375
MosOpn3	3	1	-3400	0.9375
MosOpn3	3	1	-3300	0.9375
MosOpn3	3	1	-3200	0.9375
MosOpn3	3	1	-3100	0.9375
MosOpn3	3	1	-3000	0.9375
MosOpn3	3	1	-2900	0.625
MosOpn3	3	1	-2800	0.9375
MosOpn3	3	1	-2700	0.9375
MosOpn3	3	1	-2600	0.9375
MosOpn3	3	1	-2500	0.9375
MosOpn3	3	1	-2400	0.9375
MosOpn3	3	1	-2300	0.9375
MosOpn3	3	1	-2200	0.9375
MosOpn3	3	1	-2100	0.9375
MosOpn3	3	1	-2000	0.9375
MosOpn3	3	1	-1900	0.9375
MosOpn3	3	1	-1800	0.9375
MosOpn3	3	1	-1700	0.9375
MosOpn3	3	1	-1600	0.9375
MosOpn3	3	1	-1500	0.9375
MosOpn3	3	1	-1400	0.9375
MosOpn3	3	1	-1300	0.9375
MosOpn3	3	1	-1200	0.9375
MosOpn3	3	1	-1100	0.9375
MosOpn3	3	1	-1000	0.9375
MosOpn3	3	1	-900	0.9375
MosOpn3	3	1	-800	0.9375
MosOpn3	3	1	-700	0.9375
MosOpn3	3	1	-600	0.9375
MosOpn3	3	1	-500	0.9375
MosOpn3	3	1	-400	0.9375
MosOpn3	3	1	-300	0.9375
MosOpn3	3	1	-200	0.625
MosOpn3	3	1	-100	0.9375
MosOpn3	3	1	0	0.9375
MosOpn3	3	1	100	0.9375
MosOpn3	3	1	200	0.625
MosOpn3	3	1	300	0.625
MosOpn3	3	1	400	0.3125
MosOpn3	3	1	500	0.3125
MosOpn3	3	1	600	0.3125
MosOpn3	3	1	700	0
MosOpn3	3	1	800	0
MosOpn3	3	1	900	0
MosOpn3	3	1	1000	0
MosOpn3	3	1	1100	0
MosOpn3	3	1	1200	0
MosOpn3	3	1	1300	0
MosOpn3	3	1	1400	0
MosOpn3	3	1	1500	0
MosOpn3	3	1	1600	0
MosOpn3	3	1	1700	0
MosOpn3	3	1	1800	0
MosOpn3	3	1	1900	0
MosOpn3	3	1	2000	0
MosOpn3	3	1	2100	0
MosOpn3	3	1	2200	0
MosOpn3	3	1	2300	0
MosOpn3	3	1	2400	0
MosOpn3	3	1	2500	0
MosOpn3	3	1	2600	0
MosOpn3	3	1	2700	0
MosOpn3	3	1	2800	0
MosOpn3	3	1	2900	0
MosOpn3	3	1	3000	0
MosOpn3	3	1	3100	0
MosOpn3	3	1	3200	0
MosOpn3	3	1	3300	0
MosOpn3	3	1	3400	0
MosOpn3	3	1	3500	0
MosOpn3	3	1	3600	0
MosOpn3	3	1	3700	0
MosOpn3	3	1	3800	0
MosOpn3	3	1	3900	0
MosOpn3	3	1	4000	0
MosOpn3	3	1	4100	0
MosOpn3	3	1	4200	0
MosOpn3	3	1	4300	0
MosOpn3	3	1	4400	0
MosOpn3	3	1	4500	0
MosOpn3	3	1	4600	0
MosOpn3	3	1	4700	0
MosOpn3	3	1	4800	0
MosOpn3	3	1	4900	0
MosOpn3	3	1	5000	0
MosOpn3	3	1	5100	0
MosOpn3	3	1	5200	0
MosOpn3	3	1	5300	0
MosOpn3	3	1	5400	0
MosOpn3	3	1	5500	0
MosOpn3	3	1	5600	0
MosOpn3	3	1	5700	0
MosOpn3	3	1	5800	0
MosOpn3	3	1	5900	0
MosOpn3	3	1	6000	0
MosOpn3	3	1	6100	0
MosOpn3	3	1	6200	0
MosOpn3	3	1	6300	0
MosOpn3	3	1	6400	0
MosOpn3	3	1	6500	0
MosOpn3	3	1	6600	0
MosOpn3	3	1	6700	0
MosOpn3	3	1	6800	0
MosOpn3	3	1	6900	0
MosOpn3	3	1	7000	0.3125
MosOpn3	3	1	7100	0.3125
MosOpn3	3	1	7200	0.3125
MosOpn3	3	1	7300	0.3125
MosOpn3	3	1	7400	0.3125
MosOpn3	3	1	7500	0.3125
MosOpn3	3	1	7600	0.3125
MosOpn3	3	1	7700	0.3125
MosOpn3	3	1	7800	0.3125
MosOpn3	3	1	7900	0
MosOpn3	3	1	8000	0
MosOpn3	3	1	8100	0
MosOpn3	3	1	8200	0
MosOpn3	3	1	8300	0
MosOpn3	3	1	8400	0
MosOpn3	3	1	8500	0
MosOpn3	3	1	8600	0
MosOpn3	3	1	8700	0
MosOpn3	3	1	8800	0
MosOpn3	3	1	8900	0
MosOpn3	3	1	9000	0
MosOpn3	3	1	9100	0
MosOpn3	3	1	9200	0
MosOpn3	3	1	9300	0
MosOpn3	3	1	9400	0
MosOpn3	3	1	9500	0
MosOpn3	3	1	9600	0
MosOpn3	3	1	9700	0
MosOpn3	3	1	9800	0
MosOpn3	3	1	9900	0
MosOpn3	3	1	10000	0
MosOpn3	3	1	10100	0
MosOpn3	3	1	10200	0
MosOpn3	3	1	10300	0
MosOpn3	3	1	10400	0
MosOpn3	3	1	10500	0
MosOpn3	3	1	10600	0
MosOpn3	3	1	10700	0
MosOpn3	3	1	10800	0
MosOpn3	3	1	10900	0
MosOpn3	3	1	11000	0
MosOpn3	3	1	11100	0
MosOpn3	3	1	11200	0
MosOpn3	3	1	11300	0
MosOpn3	3	1	11400	0
MosOpn3	3	1	11500	0
MosOpn3	3	1	11600	0
MosOpn3	3	1	11700	0.3125
MosOpn3	3	1	11800	0.3125
MosOpn3	3	1	11900	0.3125
MosOpn3	3	1	12000	0.3125
MosOpn3	3	1	12100	0.3125
MosOpn3	3	1	12200	0.3125
MosOpn3	3	1	12300	0.3125
MosOpn3	3	1	12400	0.3125
MosOpn3	3	1	12500	0.3125
MosOpn3	3	1	12600	0.3125
MosOpn3	3	1	12700	0
MosOpn3	3	1	12800	0
MosOpn3	3	1	12900	0
MosOpn3	3	1	13000	0
MosOpn3	3	1	13100	0
MosOpn3	3	1	13200	0
MosOpn3	3	1	13300	0
MosOpn3	3	1	13400	0
MosOpn3	3	1	13500	0
MosOpn3	3	1	13600	0
MosOpn3	3	1	13700	0
MosOpn3	3	1	13800	0
MosOpn3	3	1	13900	0
MosOpn3	3	1	14000	0
MosOpn3	3	1	14100	0
MosOpn3	3	1	14200	0
MosOpn3	3	1	14300	0
MosOpn3	3	1	14400	0
MosOpn3	3	1	14500	0
MosOpn3	3	1	14600	0
MosOpn3	3	1	14700	0
MosOpn3	3	1	14800	0
MosOpn3	3	1	14900	0
MosOpn3	3	1	15000	0
MosOpn3	3	1	15100	0
MosOpn3	3	1	15200	0
MosOpn3	3	1	15300	0
MosOpn3	3	1	15400	0
MosOpn3	3	1	15500	0
MosOpn3	3	1	15600	0
MosOpn3	3	1	15700	0
MosOpn3	3	1	15800	0
MosOpn3	3	1	15900	0
MosOpn3	3	1	16000	0
MosOpn3	3	1	16100	0
MosOpn3	3	1	16200	0
MosOpn3	3	1	16300	0
MosOpn3	3	1	16400	0
MosOpn3	3	1	16500	0
MosOpn3	3	1	16600	0
MosOpn3	3	1	16700	0
MosOpn3	3	1	16800	0
MosOpn3	3	1	16900	0
MosOpn3	3	1	17000	0
MosOpn3	3	1	17100	0
MosOpn3	3	1	17200	0
MosOpn3	3	1	17300	0
MosOpn3	3	1	17400	0
MosOpn3	3	1	17500	0
MosOpn3	3	1	17600	0.3125
MosOpn3	3	1	17700	0.3125
MosOpn3	3	1	17800	0.3125
MosOpn3	3	1	17900	0.3125
MosOpn3	3	1	18000	0.3125
MosOpn3	3	1	18100	0.3125
MosOpn3	3	1	18200	0.3125
MosOpn3	3	1	18300	0.3125
MosOpn3	3	1	18400	0.3125
MosOpn3	3	1	18500	0.3125
MosOpn3	3	1	18600	0
MosOpn3	3	1	18700	0
MosOpn3	3	1	18800	0
MosOpn3	3	1	18900	0
MosOpn3	3	1	19000	0
MosOpn3	3	1	19100	0
MosOpn3	3	1	19200	0
MosOpn3	3	1	19300	0
MosOpn3	3	1	19400	0
MosOpn3	3	1	19500	0
MosOpn3	3	1	19600	0
MosOpn3	3	1	19700	0
MosOpn3	3	1	19800	0
MosOpn3	3	1	19900	0
MosOpn3	4	1	-9500	1.6
MosOpn3	4	1	-9400	1.2
MosOpn3	4	1	-9300	1.2
MosOpn3	4	1	-9200	1.2
MosOpn3	4	1	-9100	1.2
MosOpn3	4	1	-9000	1.2
MosOpn3	4	1	-8900	0.8
MosOpn3	4	1	-8800	0.8
MosOpn3	4	1	-8700	0.8
MosOpn3	4	1	-8600	1.2
MosOpn3	4	1	-8500	0.8
MosOpn3	4	1	-8400	0.8
MosOpn3	4	1	-8300	0.8
MosOpn3	4	1	-8200	1.2
MosOpn3	4	1	-8100	0.8
MosOpn3	4	1	-8000	0.8
MosOpn3	4	1	-7900	0.8
MosOpn3	4	1	-7800	0.8
MosOpn3	4	1	-7700	1.2
MosOpn3	4	1	-7600	0.8
MosOpn3	4	1	-7500	0.8
MosOpn3	4	1	-7400	0.8
MosOpn3	4	1	-7300	1.2
MosOpn3	4	1	-7200	0.8
MosOpn3	4	1	-7100	0.8
MosOpn3	4	1	-7000	0.8
MosOpn3	4	1	-6900	0.8
MosOpn3	4	1	-6800	1.2
MosOpn3	4	1	-6700	0.8
MosOpn3	4	1	-6600	0.8
MosOpn3	4	1	-6500	0.8
MosOpn3	4	1	-6400	1.2
MosOpn3	4	1	-6300	0.8
MosOpn3	4	1	-6200	0.8
MosOpn3	4	1	-6100	1.2
MosOpn3	4	1	-6000	1.2
MosOpn3	4	1	-5900	1.2
MosOpn3	4	1	-5800	1.2
MosOpn3	4	1	-5700	1.2
MosOpn3	4	1	-5600	1.2
MosOpn3	4	1	-5500	1.6
MosOpn3	4	1	-5400	1.2
MosOpn3	4	1	-5300	1.2
MosOpn3	4	1	-5200	1.6
MosOpn3	4	1	-5100	1.2
MosOpn3	4	1	-5000	1.2
MosOpn3	4	1	-4900	1.6
MosOpn3	4	1	-4800	1.2
MosOpn3	4	1	-4700	1.2
MosOpn3	4	1	-4600	1.6
MosOpn3	4	1	-4500	1.2
MosOpn3	4	1	-4400	1.2
MosOpn3	4	1	-4300	1.2
MosOpn3	4	1	-4200	0.8
MosOpn3	4	1	-4100	0.8
MosOpn3	4	1	-4000	0.8
MosOpn3	4	1	-3900	0.4
MosOpn3	4	1	-3800	0.4
MosOpn3	4	1	-3700	0.8
MosOpn3	4	1	-3600	0.8
MosOpn3	4	1	-3500	0.8
MosOpn3	4	1	-3400	0.8
MosOpn3	4	1	-3300	0.8
MosOpn3	4	1	-3200	0.8
MosOpn3	4	1	-3100	0.8
MosOpn3	4	1	-3000	0.8
MosOpn3	4	1	-2900	0.8
MosOpn3	4	1	-2800	0.8
MosOpn3	4	1	-2700	0.8
MosOpn3	4	1	-2600	0.4
MosOpn3	4	1	-2500	0.4
MosOpn3	4	1	-2400	0.4
MosOpn3	4	1	-2300	0.8
MosOpn3	4	1	-2200	0.8
MosOpn3	4	1	-2100	0.8
MosOpn3	4	1	-2000	0.8
MosOpn3	4	1	-1900	1.2
MosOpn3	4	1	-1800	1.2
MosOpn3	4	1	-1700	0.8
MosOpn3	4	1	-1600	0.8
MosOpn3	4	1	-1500	1.2
MosOpn3	4	1	-1400	1.2
MosOpn3	4	1	-1300	0.8
MosOpn3	4	1	-1200	0.8
MosOpn3	4	1	-1100	0.8
MosOpn3	4	1	-1000	1.2
MosOpn3	4	1	-900	0.8
MosOpn3	4	1	-800	0.8
MosOpn3	4	1	-700	0.8
MosOpn3	4	1	-600	1.2
MosOpn3	4	1	-500	0.8
MosOpn3	4	1	-400	1.2
MosOpn3	4	1	-300	1.2
MosOpn3	4	1	-200	1.2
MosOpn3	4	1	-100	1.2
MosOpn3	4	1	0	0.8
MosOpn3	4	1	100	0.8
MosOpn3	4	1	200	0.8
MosOpn3	4	1	300	0.8
MosOpn3	4	1	400	0.4
MosOpn3	4	1	500	0.4
MosOpn3	4	1	600	0
MosOpn3	4	1	700	0
MosOpn3	4	1	800	0
MosOpn3	4	1	900	0
MosOpn3	4	1	1000	0
MosOpn3	4	1	1100	0
MosOpn3	4	1	1200	0
MosOpn3	4	1	1300	0
MosOpn3	4	1	1400	0
MosOpn3	4	1	1500	0
MosOpn3	4	1	1600	0
MosOpn3	4	1	1700	0
MosOpn3	4	1	1800	0
MosOpn3	4	1	1900	0
MosOpn3	4	1	2000	0
MosOpn3	4	1	2100	0
MosOpn3	4	1	2200	0
MosOpn3	4	1	2300	0
MosOpn3	4	1	2400	0
MosOpn3	4	1	2500	0
MosOpn3	4	1	2600	0
MosOpn3	4	1	2700	0
MosOpn3	4	1	2800	0
MosOpn3	4	1	2900	0
MosOpn3	4	1	3000	0
MosOpn3	4	1	3100	0
MosOpn3	4	1	3200	0.4
MosOpn3	4	1	3300	0.4
MosOpn3	4	1	3400	0.4
MosOpn3	4	1	3500	0.4
MosOpn3	4	1	3600	0.4
MosOpn3	4	1	3700	0.4
MosOpn3	4	1	3800	0.4
MosOpn3	4	1	3900	0.4
MosOpn3	4	1	4000	0.4
MosOpn3	4	1	4100	0.4
MosOpn3	4	1	4200	0
MosOpn3	4	1	4300	0
MosOpn3	4	1	4400	0
MosOpn3	4	1	4500	0
MosOpn3	4	1	4600	0
MosOpn3	4	1	4700	0
MosOpn3	4	1	4800	0
MosOpn3	4	1	4900	0
MosOpn3	4	1	5000	0
MosOpn3	4	1	5100	0
MosOpn3	4	1	5200	0
MosOpn3	4	1	5300	0
MosOpn3	4	1	5400	0
MosOpn3	4	1	5500	0
MosOpn3	4	1	5600	0
MosOpn3	4	1	5700	0
MosOpn3	4	1	5800	0
MosOpn3	4	1	5900	0
MosOpn3	4	1	6000	0
MosOpn3	4	1	6100	0
MosOpn3	4	1	6200	0
MosOpn3	4	1	6300	0
MosOpn3	4	1	6400	0
MosOpn3	4	1	6500	0
MosOpn3	4	1	6600	0
MosOpn3	4	1	6700	0
MosOpn3	4	1	6800	0
MosOpn3	4	1	6900	0
MosOpn3	4	1	7000	0
MosOpn3	4	1	7100	0
MosOpn3	4	1	7200	0.4
MosOpn3	4	1	7300	0.4
MosOpn3	4	1	7400	0.4
MosOpn3	4	1	7500	0.4
MosOpn3	4	1	7600	0.4
MosOpn3	4	1	7700	0.4
MosOpn3	4	1	7800	0.4
MosOpn3	4	1	7900	0.4
MosOpn3	4	1	8000	0.4
MosOpn3	4	1	8100	0.4
MosOpn3	4	1	8200	0
MosOpn3	4	1	8300	0
MosOpn3	4	1	8400	0
MosOpn3	4	1	8500	0
MosOpn3	4	1	8600	0
MosOpn3	4	1	8700	0
MosOpn3	4	1	8800	0
MosOpn3	4	1	8900	0
MosOpn3	4	1	9000	0
MosOpn3	4	1	9100	0
MosOpn3	4	1	9200	0
MosOpn3	4	1	9300	0
MosOpn3	4	1	9400	0
MosOpn3	4	1	9500	0
MosOpn3	4	1	9600	0
MosOpn3	4	1	9700	0.4
MosOpn3	4	1	9800	0.4
MosOpn3	4	1	9900	0.4
MosOpn3	4	1	10000	0.4
MosOpn3	4	1	10100	0.4
MosOpn3	4	1	10200	0.4
MosOpn3	4	1	10300	0.4
MosOpn3	4	1	10400	0.4
MosOpn3	4	1	10500	0.4
MosOpn3	4	1	10600	0.4
MosOpn3	4	1	10700	0
MosOpn3	4	1	10800	0
MosOpn3	4	1	10900	0
MosOpn3	4	1	11000	0
MosOpn3	4	1	11100	0
MosOpn3	4	1	11200	0
MosOpn3	4	1	11300	0
MosOpn3	4	1	11400	0
MosOpn3	4	1	11500	0.4
MosOpn3	4	1	11600	0.4
MosOpn3	4	1	11700	0.4
MosOpn3	4	1	11800	0.4
MosOpn3	4	1	11900	0.4
MosOpn3	4	1	12000	0.4
MosOpn3	4	1	12100	0.4
MosOpn3	4	1	12200	0.4
MosOpn3	4	1	12300	0.4
MosOpn3	4	1	12400	0.4
MosOpn3	4	1	12500	0
MosOpn3	4	1	12600	0
MosOpn3	4	1	12700	0
MosOpn3	4	1	12800	0
MosOpn3	4	1	12900	0
MosOpn3	4	1	13000	0
MosOpn3	4	1	13100	0
MosOpn3	4	1	13200	0
MosOpn3	4	1	13300	0
MosOpn3	4	1	13400	0
MosOpn3	4	1	13500	0.4
MosOpn3	4	1	13600	0.4
MosOpn3	4	1	13700	0.4
MosOpn3	4	1	13800	0.4
MosOpn3	4	1	13900	0.4
MosOpn3	4	1	14000	0.4
MosOpn3	4	1	14100	0.4
MosOpn3	4	1	14200	0.4
MosOpn3	4	1	14300	0.4
MosOpn3	4	1	14400	0.4
MosOpn3	4	1	14500	0
MosOpn3	4	1	14600	0
MosOpn3	4	1	14700	0
MosOpn3	4	1	14800	0
MosOpn3	4	1	14900	0.4
MosOpn3	4	1	15000	0.4
MosOpn3	4	1	15100	0.4
MosOpn3	4	1	15200	0.4
MosOpn3	4	1	15300	0.4
MosOpn3	4	1	15400	0.4
MosOpn3	4	1	15500	0.4
MosOpn3	4	1	15600	0.4
MosOpn3	4	1	15700	0.4
MosOpn3	4	1	15800	0.4
MosOpn3	4	1	15900	0
MosOpn3	4	1	16000	0
MosOpn3	4	1	16100	0
MosOpn3	4	1	16200	0
MosOpn3	4	1	16300	0
MosOpn3	4	1	16400	0
MosOpn3	4	1	16500	0
MosOpn3	4	1	16600	0.4
MosOpn3	4	1	16700	0.4
MosOpn3	4	1	16800	0.4
MosOpn3	4	1	16900	0.4
MosOpn3	4	1	17000	0.4
MosOpn3	4	1	17100	0.4
MosOpn3	4	1	17200	0.4
MosOpn3	4	1	17300	0.4
MosOpn3	4	1	17400	0.4
MosOpn3	4	1	17500	0.4
MosOpn3	4	1	17600	0
MosOpn3	4	1	17700	0
MosOpn3	4	1	17800	0
MosOpn3	4	1	17900	0
MosOpn3	4	1	18000	0
MosOpn3	4	1	18100	0
MosOpn3	4	1	18200	0.4
MosOpn3	4	1	18300	0.4
MosOpn3	4	1	18400	0.4
MosOpn3	4	1	18500	0.4
MosOpn3	4	1	18600	0.4
MosOpn3	4	1	18700	0.4
MosOpn3	4	1	18800	0.4
MosOpn3	4	1	18900	0.4
MosOpn3	4	1	19000	0.4
MosOpn3	4	1	19100	0.4
MosOpn3	4	1	19200	0
MosOpn3	4	1	19300	0
MosOpn3	4	1	19400	0
MosOpn3	4	1	19500	0
MosOpn3	4	1	19600	0
MosOpn3	4	1	19700	0.4
MosOpn3	4	1	19800	0.4
MosOpn3	4	1	19900	0.4
MosOpn3	5	1	-9500	1
MosOpn3	5	1	-9400	0.666667
MosOpn3	5	1	-9300	0.666667
MosOpn3	5	1	-9200	0.666667
MosOpn3	5	1	-9100	0.666667
MosOpn3	5	1	-9000	0.666667
MosOpn3	5	1	-8900	0.666667
MosOpn3	5	1	-8800	1
MosOpn3	5	1	-8700	1
MosOpn3	5	1	-8600	1
MosOpn3	5	1	-8500	1
MosOpn3	5	1	-8400	1
MosOpn3	5	1	-8300	1
MosOpn3	5	1	-8200	1.33333
MosOpn3	5	1	-8100	1
MosOpn3	5	1	-8000	1
MosOpn3	5	1	-7900	1
MosOpn3	5	1	-7800	1
MosOpn3	5	1	-7700	1
MosOpn3	5	1	-7600	1
MosOpn3	5	1	-7500	1
MosOpn3	5	1	-7400	1
MosOpn3	5	1	-7300	1
MosOpn3	5	1	-7200	1
MosOpn3	5	1	-7100	1
MosOpn3	5	1	-7000	1
MosOpn3	5	1	-6900	1
MosOpn3	5	1	-6800	1
MosOpn3	5	1	-6700	1
MosOpn3	5	1	-6600	1
MosOpn3	5	1	-6500	1
MosOpn3	5	1	-6400	1
MosOpn3	5	1	-6300	1
MosOpn3	5	1	-6200	1
MosOpn3	5	1	-6100	1
MosOpn3	5	1	-6000	1
MosOpn3	5	1	-5900	1
MosOpn3	5	1	-5800	1
MosOpn3	5	1	-5700	1
MosOpn3	5	1	-5600	1
MosOpn3	5	1	-5500	1
MosOpn3	5	1	-5400	1
MosOpn3	5	1	-5300	1
MosOpn3	5	1	-5200	1
MosOpn3	5	1	-5100	1
MosOpn3	5	1	-5000	1
MosOpn3	5	1	-4900	1
MosOpn3	5	1	-4800	1
MosOpn3	5	1	-4700	1
MosOpn3	5	1	-4600	1
MosOpn3	5	1	-4500	1
MosOpn3	5	1	-4400	1
MosOpn3	5	1	-4300	1
MosOpn3	5	1	-4200	1
MosOpn3	5	1	-4100	1
MosOpn3	5	1	-4000	1
MosOpn3	5	1	-3900	1
MosOpn3	5	1	-3800	1
MosOpn3	5	1	-3700	1
MosOpn3	5	1	-3600	1
MosOpn3	5	1	-3500	1
MosOpn3	5	1	-3400	1
MosOpn3	5	1	-3300	1
MosOpn3	5	1	-3200	1
MosOpn3	5	1	-3100	1
MosOpn3	5	1	-3000	1
MosOpn3	5	1	-2900	1
MosOpn3	5	1	-2800	1
MosOpn3	5	1	-2700	1
MosOpn3	5	1	-2600	1
MosOpn3	5	1	-2500	1
MosOpn3	5	1	-2400	1
MosOpn3	5	1	-2300	1
MosOpn3	5	1	-2200	1
MosOpn3	5	1	-2100	1
MosOpn3	5	1	-2000	1
MosOpn3	5	1	-1900	1.33333
MosOpn3	5	1	-1800	1
MosOpn3	5	1	-1700	1
MosOpn3	5	1	-1600	1
MosOpn3	5	1	-1500	1
MosOpn3	5	1	-1400	1
MosOpn3	5	1	-1300	1
MosOpn3	5	1	-1200	1
MosOpn3	5	1	-1100	1
MosOpn3	5	1	-1000	1
MosOpn3	5	1	-900	1
MosOpn3	5	1	-800	1
MosOpn3	5	1	-700	1
MosOpn3	5	1	-600	1
MosOpn3	5	1	-500	1
MosOpn3	5	1	-400	1
MosOpn3	5	1	-300	1
MosOpn3	5	1	-200	1
MosOpn3	5	1	-100	1
MosOpn3	5	1	0	1
MosOpn3	5	1	100	0.666667
MosOpn3	5	1	200	0.666667
MosOpn3	5	1	300	0.666667
MosOpn3	5	1	400	0.666667
MosOpn3	5	1	500	0.333333
MosOpn3	5	1	600	0.333333
MosOpn3	5	1	700	0.333333
MosOpn3	5	1	800	0
MosOpn3	5	1	900	0
MosOpn3	5	1	1000	0
MosOpn3	5	1	1100	0
MosOpn3	5	1	1200	0
MosOpn3	5	1	1300	0
MosOpn3	5	1	1400	0
MosOpn3	5	1	1500	0
MosOpn3	5	1	1600	0
MosOpn3	5	1	1700	0
MosOpn3	5	1	1800	0
MosOpn3	5	1	1900	0
MosOpn3	5	1	2000	0
MosOpn3	5	1	2100	0
MosOpn3	5	1	2200	0
MosOpn3	5	1	2300	0
MosOpn3	5	1	2400	0
MosOpn3	5	1	2500	0
MosOpn3	5	1	2600	0
MosOpn3	5	1	2700	0
MosOpn3	5	1	2800	0
MosOpn3	5	1	2900	0
MosOpn3	5	1	3000	0
MosOpn3	5	1	3100	0
MosOpn3	5	1	3200	0
MosOpn3	5	1	3300	0
MosOpn3	5	1	3400	0
MosOpn3	5	1	3500	0
MosOpn3	5	1	3600	0
MosOpn3	5	1	3700	0
MosOpn3	5	1	3800	0
MosOpn3	5	1	3900	0
MosOpn3	5	1	4000	0
MosOpn3	5	1	4100	0
MosOpn3	5	1	4200	0
MosOpn3	5	1	4300	0
MosOpn3	5	1	4400	0
MosOpn3	5	1	4500	0
MosOpn3	5	1	4600	0
MosOpn3	5	1	4700	0
MosOpn3	5	1	4800	0
MosOpn3	5	1	4900	0
MosOpn3	5	1	5000	0
MosOpn3	5	1	5100	0
MosOpn3	5	1	5200	0
MosOpn3	5	1	5300	0
MosOpn3	5	1	5400	0
MosOpn3	5	1	5500	0
MosOpn3	5	1	5600	0
MosOpn3	5	1	5700	0
MosOpn3	5	1	5800	0
MosOpn3	5	1	5900	0
MosOpn3	5	1	6000	0
MosOpn3	5	1	6100	0
MosOpn3	5	1	6200	0
MosOpn3	5	1	6300	0
MosOpn3	5	1	6400	0
MosOpn3	5	1	6500	0
MosOpn3	5	1	6600	0
MosOpn3	5	1	6700	0
MosOpn3	5	1	6800	0
MosOpn3	5	1	6900	0
MosOpn3	5	1	7000	0
MosOpn3	5	1	7100	0
MosOpn3	5	1	7200	0
MosOpn3	5	1	7300	0
MosOpn3	5	1	7400	0
MosOpn3	5	1	7500	0
MosOpn3	5	1	7600	0
MosOpn3	5	1	7700	0
MosOpn3	5	1	7800	0
MosOpn3	5	1	7900	0
MosOpn3	5	1	8000	0
MosOpn3	5	1	8100	0
MosOpn3	5	1	8200	0
MosOpn3	5	1	8300	0
MosOpn3	5	1	8400	0
MosOpn3	5	1	8500	0
MosOpn3	5	1	8600	0
MosOpn3	5	1	8700	0
MosOpn3	5	1	8800	0
MosOpn3	5	1	8900	0
MosOpn3	5	1	9000	0
MosOpn3	5	1	9100	0
MosOpn3	5	1	9200	0
MosOpn3	5	1	9300	0
MosOpn3	5	1	9400	0
MosOpn3	5	1	9500	0
MosOpn3	5	1	9600	0
MosOpn3	5	1	9700	0
MosOpn3	5	1	9800	0
MosOpn3	5	1	9900	0
MosOpn3	5	1	10000	0
MosOpn3	5	1	10100	0
MosOpn3	5	1	10200	0
MosOpn3	5	1	10300	0
MosOpn3	5	1	10400	0
MosOpn3	5	1	10500	0
MosOpn3	5	1	10600	0
MosOpn3	5	1	10700	0
MosOpn3	5	1	10800	0
MosOpn3	5	1	10900	0
MosOpn3	5	1	11000	0
MosOpn3	5	1	11100	0
MosOpn3	5	1	11200	0
MosOpn3	5	1	11300	0
MosOpn3	5	1	11400	0
MosOpn3	5	1	11500	0
MosOpn3	5	1	11600	0
MosOpn3	5	1	11700	0
MosOpn3	5	1	11800	0
MosOpn3	5	1	11900	0
MosOpn3	5	1	12000	0
MosOpn3	5	1	12100	0
MosOpn3	5	1	12200	0
MosOpn3	5	1	12300	0
MosOpn3	5	1	12400	0
MosOpn3	5	1	12500	0
MosOpn3	5	1	12600	0
MosOpn3	5	1	12700	0
MosOpn3	5	1	12800	0
MosOpn3	5	1	12900	0
MosOpn3	5	1	13000	0
MosOpn3	5	1	13100	0
MosOpn3	5	1	13200	0
MosOpn3	5	1	13300	0
MosOpn3	5	1	13400	0
MosOpn3	5	1	13500	0
MosOpn3	5	1	13600	0
MosOpn3	5	1	13700	0
MosOpn3	5	1	13800	0
MosOpn3	5	1	13900	0
MosOpn3	5	1	14000	0
MosOpn3	5	1	14100	0
MosOpn3	5	1	14200	0
MosOpn3	5	1	14300	0
MosOpn3	5	1	14400	0
MosOpn3	5	1	14500	0
MosOpn3	5	1	14600	0
MosOpn3	5	1	14700	0
MosOpn3	5	1	14800	0
MosOpn3	5	1	14900	0.333333
MosOpn3	5	1	15000	0.333333
MosOpn3	5	1	15100	0.333333
MosOpn3	5	1	15200	0.333333
MosOpn3	5	1	15300	0.333333
MosOpn3	5	1	15400	0.333333
MosOpn3	5	1	15500	0.333333
MosOpn3	5	1	15600	0.333333
MosOpn3	5	1	15700	0.333333
MosOpn3	5	1	15800	0.333333
MosOpn3	5	1	15900	0
MosOpn3	5	1	16000	0
MosOpn3	5	1	16100	0
MosOpn3	5	1	16200	0
MosOpn3	5	1	16300	0
MosOpn3	5	1	16400	0
MosOpn3	5	1	16500	0.333333
MosOpn3	5	1	16600	0.333333
MosOpn3	5	1	16700	0.333333
MosOpn3	5	1	16800	0.333333
MosOpn3	5	1	16900	0.333333
MosOpn3	5	1	17000	0.333333
MosOpn3	5	1	17100	0.333333
MosOpn3	5	1	17200	0.333333
MosOpn3	5	1	17300	0.333333
MosOpn3	5	1	17400	0.333333
MosOpn3	5	1	17500	0
MosOpn3	5	1	17600	0
MosOpn3	5	1	17700	0
MosOpn3	5	1	17800	0
MosOpn3	5	1	17900	0
MosOpn3	5	1	18000	0
MosOpn3	5	1	18100	0
MosOpn3	5	1	18200	0
MosOpn3	5	1	18300	0
MosOpn3	5	1	18400	0
MosOpn3	5	1	18500	0
MosOpn3	5	1	18600	0
MosOpn3	5	1	18700	0
MosOpn3	5	1	18800	0
MosOpn3	5	1	18900	0
MosOpn3	5	1	19000	0
MosOpn3	5	1	19100	0
MosOpn3	5	1	19200	0
MosOpn3	5	1	19300	0
MosOpn3	5	1	19400	0
MosOpn3	5	1	19500	0
MosOpn3	5	1	19600	0
MosOpn3	5	1	19700	0
MosOpn3	5	1	19800	0
MosOpn3	5	1	19900	0
MosOpn3	6	1	-9500	1.15385
MosOpn3	6	1	-9400	1.15385
MosOpn3	6	1	-9300	0.769231
MosOpn3	6	1	-9200	0.769231
MosOpn3	6	1	-9100	0.769231
MosOpn3	6	1	-9000	1.15385
MosOpn3	6	1	-8900	1.15385
MosOpn3	6	1	-8800	0.769231
MosOpn3	6	1	-8700	0.769231
MosOpn3	6	1	-8600	1.15385
MosOpn3	6	1	-8500	1.15385
MosOpn3	6	1	-8400	0.769231
MosOpn3	6	1	-8300	0.769231
MosOpn3	6	1	-8200	1.15385
MosOpn3	6	1	-8100	1.15385
MosOpn3	6	1	-8000	0.769231
MosOpn3	6	1	-7900	0.769231
MosOpn3	6	1	-7800	1.15385
MosOpn3	6	1	-7700	1.15385
MosOpn3	6	1	-7600	0.769231
MosOpn3	6	1	-7500	0.769231
MosOpn3	6	1	-7400	1.15385
MosOpn3	6	1	-7300	1.15385
MosOpn3	6	1	-7200	0.769231
MosOpn3	6	1	-7100	0.769231
MosOpn3	6	1	-7000	1.15385
MosOpn3	6	1	-6900	1.15385
MosOpn3	6	1	-6800	0.769231
MosOpn3	6	1	-6700	0.769231
MosOpn3	6	1	-6600	1.15385
MosOpn3	6	1	-6500	1.15385
MosOpn3	6	1	-6400	0.769231
MosOpn3	6	1	-6300	0.769231
MosOpn3	6	1	-6200	1.15385
MosOpn3	6	1	-6100	1.15385
MosOpn3	6	1	-6000	0.769231
MosOpn3	6	1	-5900	0.769231
MosOpn3	6	1	-5800	1.15385
MosOpn3	6	1	-5700	1.15385
MosOpn3	6	1	-5600	0.769231
MosOpn3	6	1	-5500	0.769231
MosOpn3	6	1	-5400	1.15385
MosOpn3	6	1	-5300	1.15385
MosOpn3	6	1	-5200	0.769231
MosOpn3	6	1	-5100	0.769231
MosOpn3	6	1	-5000	1.15385
MosOpn3	6	1	-4900	1.15385
MosOpn3	6	1	-4800	0.769231
MosOpn3	6	1	-4700	0.769231
MosOpn3	6	1	-4600	1.15385
MosOpn3	6	1	-4500	1.15385
MosOpn3	6	1	-4400	0.769231
MosOpn3	6	1	-4300	0.769231
MosOpn3	6	1	-4200	1.15385
MosOpn3	6	1	-4100	1.15385
MosOpn3	6	1	-4000	0.769231
MosOpn3	6	1	-3900	0.769231
MosOpn3	6	1	-3800	1.15385
MosOpn3	6	1	-3700	1.15385
MosOpn3	6	1	-3600	0.769231
MosOpn3	6	1	-3500	0.769231
MosOpn3	6	1	-3400	1.15385
MosOpn3	6	1	-3300	1.15385
MosOpn3	6	1	-3200	0.769231
MosOpn3	6	1	-3100	0.769231
MosOpn3	6	1	-3000	1.15385
MosOpn3	6	1	-2900	1.15385
MosOpn3	6	1	-2800	0.769231
MosOpn3	6	1	-2700	0.769231
MosOpn3	6	1	-2600	1.15385
MosOpn3	6	1	-2500	1.15385
MosOpn3	6	1	-2400	0.769231
MosOpn3	6	1	-2300	0.769231
MosOpn3	6	1	-2200	1.15385
MosOpn3	6	1	-2100	1.15385
MosOpn3	6	1	-2000	0.769231
MosOpn3	6	1	-1900	0.769231
MosOpn3	6	1	-1800	1.15385
MosOpn3	6	1	-1700	1.15385
MosOpn3	6	1	-1600	0.769231
MosOpn3	6	1	-1500	0.769231
MosOpn3	6	1	-1400	1.15385
MosOpn3	6	1	-1300	1.15385
MosOpn3	6	1	-1200	0.769231
MosOpn3	6	1	-1100	0.769231
MosOpn3	6	1	-1000	0.769231
MosOpn3	6	1	-900	1.15385
MosOpn3	6	1	-800	0.769231
MosOpn3	6	1	-700	0.769231
MosOpn3	6	1	-600	0.769231
MosOpn3	6	1	-500	1.15385
MosOpn3	6	1	-400	0.769231
MosOpn3	6	1	-300	0.769231
MosOpn3	6	1	-200	0.769231
MosOpn3	6	1	-100	1.15385
MosOpn3	6	1	0	1.15385
MosOpn3	6	1	100	0.769231
MosOpn3	6	1	200	0.769231
MosOpn3	6	1	300	1.15385
MosOpn3	6	1	400	1.15385
MosOpn3	6	1	500	0.769231
MosOpn3	6	1	600	0.769231
MosOpn3	6	1	700	1.15385
MosOpn3	6	1	800	1.15385
MosOpn3	6	1	900	0.769231
MosOpn3	6	1	1000	0.769231
MosOpn3	6	1	1100	0.769231
MosOpn3	6	1	1200	0.769231
MosOpn3	6	1	1300	0.384615
MosOpn3	6	1	1400	0.384615
MosOpn3	6	1	1500	0.384615
MosOpn3	6	1	1600	0.384615
MosOpn3	6	1	1700	0
MosOpn3	6	1	1800	0
MosOpn3	6	1	1900	0
MosOpn3	6	1	2000	0
MosOpn3	6	1	2100	0
MosOpn3	6	1	2200	0
MosOpn3	6	1	2300	0
MosOpn3	6	1	2400	0
MosOpn3	6	1	2500	0
MosOpn3	6	1	2600	0
MosOpn3	6	1	2700	0
MosOpn3	6	1	2800	0
MosOpn3	6	1	2900	0
MosOpn3	6	1	3000	0
MosOpn3	6	1	3100	0
MosOpn3	6	1	3200	0
MosOpn3	6	1	3300	0
MosOpn3	6	1	3400	0
MosOpn3	6	1	3500	0
MosOpn3	6	1	3600	0
MosOpn3	6	1	3700	0
MosOpn3	6	1	3800	0
MosOpn3	6	1	3900	0
MosOpn3	6	1	4000	0
MosOpn3	6	1	4100	0
MosOpn3	6	1	4200	0
MosOpn3	6	1	4300	0
MosOpn3	6	1	4400	0
MosOpn3	6	1	4500	0
MosOpn3	6	1	4600	0
MosOpn3	6	1	4700	0
MosOpn3	6	1	4800	0
MosOpn3	6	1	4900	0
MosOpn3	6	1	5000	0
MosOpn3	6	1	5100	0
MosOpn3	6	1	5200	0
MosOpn3	6	1	5300	0
MosOpn3	6	1	5400	0
MosOpn3	6	1	5500	0
MosOpn3	6	1	5600	0
MosOpn3	6	1	5700	0
MosOpn3	6	1	5800	0
MosOpn3	6	1	5900	0
MosOpn3	6	1	6000	0
MosOpn3	6	1	6100	0
MosOpn3	6	1	6200	0
MosOpn3	6	1	6300	0
MosOpn3	6	1	6400	0
MosOpn3	6	1	6500	0
MosOpn3	6	1	6600	0
MosOpn3	6	1	6700	0
MosOpn3	6	1	6800	0
MosOpn3	6	1	6900	0
MosOpn3	6	1	7000	0
MosOpn3	6	1	7100	0
MosOpn3	6	1	7200	0
MosOpn3	6	1	7300	0
MosOpn3	6	1	7400	0
MosOpn3	6	1	7500	0
MosOpn3	6	1	7600	0
MosOpn3	6	1	7700	0
MosOpn3	6	1	7800	0
MosOpn3	6	1	7900	0
MosOpn3	6	1	8000	0
MosOpn3	6	1	8100	0
MosOpn3	6	1	8200	0
MosOpn3	6	1	8300	0
MosOpn3	6	1	8400	0
MosOpn3	6	1	8500	0
MosOpn3	6	1	8600	0
MosOpn3	6	1	8700	0
MosOpn3	6	1	8800	0
MosOpn3	6	1	8900	0
MosOpn3	6	1	9000	0
MosOpn3	6	1	9100	0
MosOpn3	6	1	9200	0
MosOpn3	6	1	9300	0
MosOpn3	6	1	9400	0
MosOpn3	6	1	9500	0
MosOpn3	6	1	9600	0
MosOpn3	6	1	9700	0
MosOpn3	6	1	9800	0
MosOpn3	6	1	9900	0
MosOpn3	6	1	10000	0
MosOpn3	6	1	10100	0
MosOpn3	6	1	10200	0
MosOpn3	6	1	10300	0
MosOpn3	6	1	10400	0
MosOpn3	6	1	10500	0
MosOpn3	6	1	10600	0
MosOpn3	6	1	10700	0
MosOpn3	6	1	10800	0
MosOpn3	6	1	10900	0
MosOpn3	6	1	11000	0
MosOpn3	6	1	11100	0
MosOpn3	6	1	11200	0
MosOpn3	6	1	11300	0
MosOpn3	6	1	11400	0
MosOpn3	6	1	11500	0
MosOpn3	6	1	11600	0
MosOpn3	6	1	11700	0
MosOpn3	6	1	11800	0
MosOpn3	6	1	11900	0
MosOpn3	6	1	12000	0
MosOpn3	6	1	12100	0
MosOpn3	6	1	12200	0
MosOpn3	6	1	12300	0
MosOpn3	6	1	12400	0
MosOpn3	6	1	12500	0
MosOpn3	6	1	12600	0
MosOpn3	6	1	12700	0
MosOpn3	6	1	12800	0
MosOpn3	6	1	12900	0
MosOpn3	6	1	13000	0
MosOpn3	6	1	13100	0
MosOpn3	6	1	13200	0
MosOpn3	6	1	13300	0
MosOpn3	6	1	13400	0
MosOpn3	6	1	13500	0
MosOpn3	6	1	13600	0
MosOpn3	6	1	13700	0
MosOpn3	6	1	13800	0
MosOpn3	6	1	13900	0
MosOpn3	6	1	14000	0
MosOpn3	6	1	14100	0
MosOpn3	6	1	14200	0
MosOpn3	6	1	14300	0
MosOpn3	6	1	14400	0
MosOpn3	6	1	14500	0
MosOpn3	6	1	14600	0
MosOpn3	6	1	14700	0
MosOpn3	6	1	14800	0
MosOpn3	6	1	14900	0
MosOpn3	6	1	15000	0
MosOpn3	6	1	15100	0
MosOpn3	6	1	15200	0
MosOpn3	6	1	15300	0
MosOpn3	6	1	15400	0
MosOpn3	6	1	15500	0
MosOpn3	6	1	15600	0
MosOpn3	6	1	15700	0
MosOpn3	6	1	15800	0
MosOpn3	6	1	15900	0
MosOpn3	6	1	16000	0
MosOpn3	6	1	16100	0
MosOpn3	6	1	16200	0
MosOpn3	6	1	16300	0
MosOpn3	6	1	16400	0
MosOpn3	6	1	16500	0
MosOpn3	6	1	16600	0
MosOpn3	6	1	16700	0
MosOpn3	6	1	16800	0
MosOpn3	6	1	16900	0
MosOpn3	6	1	17000	0
MosOpn3	6	1	17100	0
MosOpn3	6	1	17200	0
MosOpn3	6	1	17300	0
MosOpn3	6	1	17400	0
MosOpn3	6	1	17500	0
MosOpn3	6	1	17600	0
MosOpn3	6	1	17700	0
MosOpn3	6	1	17800	0
MosOpn3	6	1	17900	0
MosOpn3	6	1	18000	0
MosOpn3	6	1	18100	0
MosOpn3	6	1	18200	0
MosOpn3	6	1	18300	0
MosOpn3	6	1	18400	0
MosOpn3	6	1	18500	0
MosOpn3	6	1	18600	0
MosOpn3	6	1	18700	0
MosOpn3	6	1	18800	0
MosOpn3	6	1	18900	0
MosOpn3	6	1	19000	0
MosOpn3	6	1	19100	0
MosOpn3	6	1	19200	0
MosOpn3	6	1	19300	0
MosOpn3	6	1	19400	0
MosOpn3	6	1	19500	0
MosOpn3	6	1	19600	0
MosOpn3	6	1	19700	0
MosOpn3	6	1	19800	0
MosOpn3	6	1	19900	0
MosOpn3	6	6	-9500	1.07143
MosOpn3	6	6	-9400	1.07143
MosOpn3	6	6	-9300	1.07143
MosOpn3	6	6	-9200	1.07143
MosOpn3	6	6	-9100	1.07143
MosOpn3	6	6	-9000	0.714286
MosOpn3	6	6	-8900	1.07143
MosOpn3	6	6	-8800	1.07143
MosOpn3	6	6	-8700	1.07143
MosOpn3	6	6	-8600	0.714286
MosOpn3	6	6	-8500	1.07143
MosOpn3	6	6	-8400	1.07143
MosOpn3	6	6	-8300	0.714286
MosOpn3	6	6	-8200	1.07143
MosOpn3	6	6	-8100	1.07143
MosOpn3	6	6	-8000	1.07143
MosOpn3	6	6	-7900	0.714286
MosOpn3	6	6	-7800	1.07143
MosOpn3	6	6	-7700	1.07143
MosOpn3	6	6	-7600	1.07143
MosOpn3	6	6	-7500	1.07143
MosOpn3	6	6	-7400	1.07143
MosOpn3	6	6	-7300	1.07143
MosOpn3	6	6	-7200	0.714286
MosOpn3	6	6	-7100	1.07143
MosOpn3	6	6	-7000	1.07143
MosOpn3	6	6	-6900	1.07143
MosOpn3	6	6	-6800	0.714286
MosOpn3	6	6	-6700	1.07143
MosOpn3	6	6	-6600	1.07143
MosOpn3	6	6	-6500	0.714286
MosOpn3	6	6	-6400	1.07143
MosOpn3	6	6	-6300	1.07143
MosOpn3	6	6	-6200	1.07143
MosOpn3	6	6	-6100	0.714286
MosOpn3	6	6	-6000	1.07143
MosOpn3	6	6	-5900	1.07143
MosOpn3	6	6	-5800	1.07143
MosOpn3	6	6	-5700	1.07143
MosOpn3	6	6	-5600	1.07143
MosOpn3	6	6	-5500	1.07143
MosOpn3	6	6	-5400	0.714286
MosOpn3	6	6	-5300	1.07143
MosOpn3	6	6	-5200	1.07143
MosOpn3	6	6	-5100	1.07143
MosOpn3	6	6	-5000	0.714286
MosOpn3	6	6	-4900	1.07143
MosOpn3	6	6	-4800	1.07143
MosOpn3	6	6	-4700	0.714286
MosOpn3	6	6	-4600	1.07143
MosOpn3	6	6	-4500	1.07143
MosOpn3	6	6	-4400	1.07143
MosOpn3	6	6	-4300	0.714286
MosOpn3	6	6	-4200	1.07143
MosOpn3	6	6	-4100	1.07143
MosOpn3	6	6	-4000	1.07143
MosOpn3	6	6	-3900	1.07143
MosOpn3	6	6	-3800	1.07143
MosOpn3	6	6	-3700	1.07143
MosOpn3	6	6	-3600	0.714286
MosOpn3	6	6	-3500	1.07143
MosOpn3	6	6	-3400	1.07143
MosOpn3	6	6	-3300	1.07143
MosOpn3	6	6	-3200	0.714286
MosOpn3	6	6	-3100	1.07143
MosOpn3	6	6	-3000	1.07143
MosOpn3	6	6	-2900	0.714286
MosOpn3	6	6	-2800	1.07143
MosOpn3	6	6	-2700	1.07143
MosOpn3	6	6	-2600	1.07143
MosOpn3	6	6	-2500	0.714286
MosOpn3	6	6	-2400	1.07143
MosOpn3	6	6	-2300	1.07143
MosOpn3	6	6	-2200	1.07143
MosOpn3	6	6	-2100	1.07143
MosOpn3	6	6	-2000	1.07143
MosOpn3	6	6	-1900	1.07143
MosOpn3	6	6	-1800	0.714286
MosOpn3	6	6	-1700	1.07143
MosOpn3	6	6	-1600	1.07143
MosOpn3	6	6	-1500	1.07143
MosOpn3	6	6	-1400	0.714286
MosOpn3	6	6	-1300	1.07143
MosOpn3	6	6	-1200	1.07143
MosOpn3	6	6	-1100	0.714286
MosOpn3	6	6	-1000	1.07143
MosOpn3	6	6	-900	1.07143
MosOpn3	6	6	-800	1.07143
MosOpn3	6	6	-700	0.714286
MosOpn3	6	6	-600	1.07143
MosOpn3	6	6	-500	1.07143
MosOpn3	6	6	-400	1.07143
MosOpn3	6	6	-300	1.07143
MosOpn3	6	6	-200	1.07143
MosOpn3	6	6	-100	1.07143
MosOpn3	6	6	0	0.714286
MosOpn3	6	6	100	0.714286
MosOpn3	6	6	200	0.714286
MosOpn3	6	6	300	0.714286
MosOpn3	6	6	400	0.357143
MosOpn3	6	6	500	0.357143
MosOpn3	6	6	600	0.357143
MosOpn3	6	6	700	0
MosOpn3	6	6	800	0
MosOpn3	6	6	900	0
MosOpn3	6	6	1000	0
MosOpn3	6	6	1100	0
MosOpn3	6	6	1200	0
MosOpn3	6	6	1300	0
MosOpn3	6	6	1400	0
MosOpn3	6	6	1500	0
MosOpn3	6	6	1600	0
MosOpn3	6	6	1700	0
MosOpn3	6	6	1800	0
MosOpn3	6	6	1900	0
MosOpn3	6	6	2000	0
MosOpn3	6	6	2100	0
MosOpn3	6	6	2200	0
MosOpn3	6	6	2300	0
MosOpn3	6	6	2400	0
MosOpn3	6	6	2500	0
MosOpn3	6	6	2600	0
MosOpn3	6	6	2700	0
MosOpn3	6	6	2800	0
MosOpn3	6	6	2900	0
MosOpn3	6	6	3000	0
MosOpn3	6	6	3100	0
MosOpn3	6	6	3200	0
MosOpn3	6	6	3300	0
MosOpn3	6	6	3400	0
MosOpn3	6	6	3500	0
MosOpn3	6	6	3600	0
MosOpn3	6	6	3700	0
MosOpn3	6	6	3800	0
MosOpn3	6	6	3900	0
MosOpn3	6	6	4000	0
MosOpn3	6	6	4100	0
MosOpn3	6	6	4200	0
MosOpn3	6	6	4300	0
MosOpn3	6	6	4400	0
MosOpn3	6	6	4500	0
MosOpn3	6	6	4600	0
MosOpn3	6	6	4700	0
MosOpn3	6	6	4800	0
MosOpn3	6	6	4900	0
MosOpn3	6	6	5000	0
MosOpn3	6	6	5100	0
MosOpn3	6	6	5200	0
MosOpn3	6	6	5300	0
MosOpn3	6	6	5400	0
MosOpn3	6	6	5500	0
MosOpn3	6	6	5600	0
MosOpn3	6	6	5700	0
MosOpn3	6	6	5800	0
MosOpn3	6	6	5900	0
MosOpn3	6	6	6000	0
MosOpn3	6	6	6100	0
MosOpn3	6	6	6200	0
MosOpn3	6	6	6300	0
MosOpn3	6	6	6400	0
MosOpn3	6	6	6500	0
MosOpn3	6	6	6600	0
MosOpn3	6	6	6700	0
MosOpn3	6	6	6800	0
MosOpn3	6	6	6900	0
MosOpn3	6	6	7000	0
MosOpn3	6	6	7100	0
MosOpn3	6	6	7200	0
MosOpn3	6	6	7300	0
MosOpn3	6	6	7400	0
MosOpn3	6	6	7500	0
MosOpn3	6	6	7600	0
MosOpn3	6	6	7700	0
MosOpn3	6	6	7800	0
MosOpn3	6	6	7900	0
MosOpn3	6	6	8000	0
MosOpn3	6	6	8100	0
MosOpn3	6	6	8200	0
MosOpn3	6	6	8300	0
MosOpn3	6	6	8400	0
MosOpn3	6	6	8500	0
MosOpn3	6	6	8600	0
MosOpn3	6	6	8700	0
MosOpn3	6	6	8800	0
MosOpn3	6	6	8900	0
MosOpn3	6	6	9000	0
MosOpn3	6	6	9100	0
MosOpn3	6	6	9200	0
MosOpn3	6	6	9300	0
MosOpn3	6	6	9400	0
MosOpn3	6	6	9500	0
MosOpn3	6	6	9600	0
MosOpn3	6	6	9700	0
MosOpn3	6	6	9800	0
MosOpn3	6	6	9900	0
MosOpn3	6	6	10000	0
MosOpn3	6	6	10100	0
MosOpn3	6	6	10200	0
MosOpn3	6	6	10300	0
MosOpn3	6	6	10400	0
MosOpn3	6	6	10500	0
MosOpn3	6	6	10600	0
MosOpn3	6	6	10700	0
MosOpn3	6	6	10800	0
MosOpn3	6	6	10900	0
MosOpn3	6	6	11000	0
MosOpn3	6	6	11100	0
MosOpn3	6	6	11200	0
MosOpn3	6	6	11300	0
MosOpn3	6	6	11400	0
MosOpn3	6	6	11500	0
MosOpn3	6	6	11600	0
MosOpn3	6	6	11700	0
MosOpn3	6	6	11800	0
MosOpn3	6	6	11900	0
MosOpn3	6	6	12000	0
MosOpn3	6	6	12100	0
MosOpn3	6	6	12200	0
MosOpn3	6	6	12300	0
MosOpn3	6	6	12400	0
MosOpn3	6	6	12500	0
MosOpn3	6	6	12600	0
MosOpn3	6	6	12700	0
MosOpn3	6	6	12800	0
MosOpn3	6	6	12900	0
MosOpn3	6	6	13000	0
MosOpn3	6	6	13100	0
MosOpn3	6	6	13200	0
MosOpn3	6	6	13300	0
[truncated: 5,376 more rows]

## Sheet: B
Line	Sample_number	Trial_number	Latency to cardiac arrest (ms)
MosOpn3	1	1	277
MosOpn3	1	6	381
MosOpn3	2	1	1295
MosOpn3	2	6	471
MosOpn3	3	1	3482
MosOpn3	3	6	785
MosOpn3	4	1	336
MosOpn3	4	6	1235
PufTMT	1	1	338
PufTMT	1	6	812
PufTMT	2	1	548
PufTMT	2	6	1687
PufTMT	3	1	980
PufTMT	3	6	470
PufTMT	4	1	1939
PufTMT	4	6	1452
LamPP	1	1	1280
LamPP	1	6	546
LamPP	2	1	953
LamPP	2	6	1040
LamPP	3	1	1492
LamPP	3	6	1238
LamPP	4	1	156
LamPP	4	6	815

## Sheet: C
Line	Sample_number	Trial_number	Time to resumption of heartbeat (ms)
MosOpn3	1	1	2918
MosOpn3	1	6	7203
MosOpn3	2	1	3457
MosOpn3	2	6	939
MosOpn3	3	1	32870
MosOpn3	3	6	23370
MosOpn3	4	1	3052
MosOpn3	4	6	2453
PufTMT	1	1	402
PufTMT	1	6	472
PufTMT	2	1	13109
PufTMT	2	6	14159
PufTMT	3	1	4235
PufTMT	3	6	1583
PufTMT	4	1	1793
PufTMT	4	6	8760
LamPP	1	1	20000
LamPP	1	6	13271
LamPP	2	1	16135
LamPP	2	6	7870
LamPP	3	1	14667
LamPP	3	6	1241
LamPP	4	1	29873
LamPP	4	6	2258
