# Supplementary material for: Optogenetic manipulation of Gq- and Gi/o-coupled receptor signaling in neurons and heart muscle cells
Source: eLife. 2023 Aug 17;12:e83974. doi: 10.7554/eLife.83974 (PMC10435233; doi:10.7554/eLife.83974)
Supplement: Figure 4—figure supplement 2—source data 1. [file elife-83974-fig4-figsupp2-data1.xlsx]

## Sheet: A
Line	light intensity	sample	time (ms)	R_HB
MosOpn3	0.5	1	-9500	0.555556
MosOpn3	0.5	1	-9400	0.555556
MosOpn3	0.5	1	-9300	0.555556
MosOpn3	0.5	1	-9200	0.833333
MosOpn3	0.5	1	-9100	0.833333
MosOpn3	0.5	1	-9000	0.833333
MosOpn3	0.5	1	-8900	0.833333
MosOpn3	0.5	1	-8800	0.833333
MosOpn3	0.5	1	-8700	1.11111
MosOpn3	0.5	1	-8600	1.11111
MosOpn3	0.5	1	-8500	1.11111
MosOpn3	0.5	1	-8400	1.11111
MosOpn3	0.5	1	-8300	1.11111
MosOpn3	0.5	1	-8200	1.11111
MosOpn3	0.5	1	-8100	1.11111
MosOpn3	0.5	1	-8000	0.833333
MosOpn3	0.5	1	-7900	1.11111
MosOpn3	0.5	1	-7800	1.11111
MosOpn3	0.5	1	-7700	0.833333
MosOpn3	0.5	1	-7600	1.11111
MosOpn3	0.5	1	-7500	1.11111
MosOpn3	0.5	1	-7400	0.833333
MosOpn3	0.5	1	-7300	1.11111
MosOpn3	0.5	1	-7200	0.833333
MosOpn3	0.5	1	-7100	1.11111
MosOpn3	0.5	1	-7000	1.11111
MosOpn3	0.5	1	-6900	0.833333
MosOpn3	0.5	1	-6800	1.11111
MosOpn3	0.5	1	-6700	1.11111
MosOpn3	0.5	1	-6600	1.11111
MosOpn3	0.5	1	-6500	1.11111
MosOpn3	0.5	1	-6400	1.11111
MosOpn3	0.5	1	-6300	1.11111
MosOpn3	0.5	1	-6200	1.11111
MosOpn3	0.5	1	-6100	0.833333
MosOpn3	0.5	1	-6000	1.11111
MosOpn3	0.5	1	-5900	1.11111
MosOpn3	0.5	1	-5800	0.833333
MosOpn3	0.5	1	-5700	1.11111
MosOpn3	0.5	1	-5600	0.833333
MosOpn3	0.5	1	-5500	1.11111
MosOpn3	0.5	1	-5400	1.11111
MosOpn3	0.5	1	-5300	0.833333
MosOpn3	0.5	1	-5200	1.11111
MosOpn3	0.5	1	-5100	1.11111
MosOpn3	0.5	1	-5000	0.833333
MosOpn3	0.5	1	-4900	1.11111
MosOpn3	0.5	1	-4800	1.11111
MosOpn3	0.5	1	-4700	1.11111
MosOpn3	0.5	1	-4600	1.11111
MosOpn3	0.5	1	-4500	0.833333
MosOpn3	0.5	1	-4400	1.11111
MosOpn3	0.5	1	-4300	1.11111
MosOpn3	0.5	1	-4200	0.833333
MosOpn3	0.5	1	-4100	1.11111
MosOpn3	0.5	1	-4000	1.11111
MosOpn3	0.5	1	-3900	1.11111
MosOpn3	0.5	1	-3800	1.11111
MosOpn3	0.5	1	-3700	0.833333
MosOpn3	0.5	1	-3600	1.11111
MosOpn3	0.5	1	-3500	1.11111
MosOpn3	0.5	1	-3400	0.833333
MosOpn3	0.5	1	-3300	1.11111
MosOpn3	0.5	1	-3200	1.11111
MosOpn3	0.5	1	-3100	0.833333
MosOpn3	0.5	1	-3000	1.11111
MosOpn3	0.5	1	-2900	0.833333
MosOpn3	0.5	1	-2800	1.11111
MosOpn3	0.5	1	-2700	1.11111
MosOpn3	0.5	1	-2600	0.833333
MosOpn3	0.5	1	-2500	1.11111
MosOpn3	0.5	1	-2400	1.11111
MosOpn3	0.5	1	-2300	0.833333
MosOpn3	0.5	1	-2200	1.11111
MosOpn3	0.5	1	-2100	1.11111
MosOpn3	0.5	1	-2000	1.11111
MosOpn3	0.5	1	-1900	1.11111
MosOpn3	0.5	1	-1800	0.833333
MosOpn3	0.5	1	-1700	1.11111
MosOpn3	0.5	1	-1600	1.11111
MosOpn3	0.5	1	-1500	1.11111
MosOpn3	0.5	1	-1400	1.11111
MosOpn3	0.5	1	-1300	1.11111
MosOpn3	0.5	1	-1200	1.11111
MosOpn3	0.5	1	-1100	1.11111
MosOpn3	0.5	1	-1000	0.833333
MosOpn3	0.5	1	-900	1.11111
MosOpn3	0.5	1	-800	1.11111
MosOpn3	0.5	1	-700	0.833333
MosOpn3	0.5	1	-600	1.11111
MosOpn3	0.5	1	-500	0.833333
MosOpn3	0.5	1	-400	0.833333
MosOpn3	0.5	1	-300	1.11111
MosOpn3	0.5	1	-200	0.833333
MosOpn3	0.5	1	-100	0.833333
MosOpn3	0.5	1	0	1.11111
MosOpn3	0.5	1	100	0.833333
MosOpn3	0.5	1	200	0.833333
MosOpn3	0.5	1	300	0.833333
MosOpn3	0.5	1	400	0.555556
MosOpn3	0.5	1	500	0.555556
MosOpn3	0.5	1	600	0.555556
MosOpn3	0.5	1	700	0.277778
MosOpn3	0.5	1	800	0.277778
MosOpn3	0.5	1	900	0.277778
MosOpn3	0.5	1	1000	0
MosOpn3	0.5	1	1100	0
MosOpn3	0.5	1	1200	0
MosOpn3	0.5	1	1300	0
MosOpn3	0.5	1	1400	0
MosOpn3	0.5	1	1500	0
MosOpn3	0.5	1	1600	0
MosOpn3	0.5	1	1700	0
MosOpn3	0.5	1	1800	0
MosOpn3	0.5	1	1900	0
MosOpn3	0.5	1	2000	0
MosOpn3	0.5	1	2100	0
MosOpn3	0.5	1	2200	0
MosOpn3	0.5	1	2300	0
MosOpn3	0.5	1	2400	0
MosOpn3	0.5	1	2500	0
MosOpn3	0.5	1	2600	0
MosOpn3	0.5	1	2700	0
MosOpn3	0.5	1	2800	0
MosOpn3	0.5	1	2900	0
MosOpn3	0.5	1	3000	0
MosOpn3	0.5	1	3100	0
MosOpn3	0.5	1	3200	0
MosOpn3	0.5	1	3300	0
MosOpn3	0.5	1	3400	0
MosOpn3	0.5	1	3500	0
MosOpn3	0.5	1	3600	0
MosOpn3	0.5	1	3700	0
MosOpn3	0.5	1	3800	0
MosOpn3	0.5	1	3900	0
MosOpn3	0.5	1	4000	0
MosOpn3	0.5	1	4100	0
MosOpn3	0.5	1	4200	0
MosOpn3	0.5	1	4300	0
MosOpn3	0.5	1	4400	0
MosOpn3	0.5	1	4500	0
MosOpn3	0.5	1	4600	0
MosOpn3	0.5	1	4700	0
MosOpn3	0.5	1	4800	0
MosOpn3	0.5	1	4900	0
MosOpn3	0.5	1	5000	0
MosOpn3	0.5	1	5100	0
MosOpn3	0.5	1	5200	0.277778
MosOpn3	0.5	1	5300	0.277778
MosOpn3	0.5	1	5400	0.277778
MosOpn3	0.5	1	5500	0.277778
MosOpn3	0.5	1	5600	0.277778
MosOpn3	0.5	1	5700	0.277778
MosOpn3	0.5	1	5800	0.277778
MosOpn3	0.5	1	5900	0.277778
MosOpn3	0.5	1	6000	0.277778
MosOpn3	0.5	1	6100	0.277778
MosOpn3	0.5	1	6200	0
MosOpn3	0.5	1	6300	0
MosOpn3	0.5	1	6400	0
MosOpn3	0.5	1	6500	0
MosOpn3	0.5	1	6600	0
MosOpn3	0.5	1	6700	0
MosOpn3	0.5	1	6800	0
MosOpn3	0.5	1	6900	0
MosOpn3	0.5	1	7000	0
MosOpn3	0.5	1	7100	0
MosOpn3	0.5	1	7200	0
MosOpn3	0.5	1	7300	0
MosOpn3	0.5	1	7400	0
MosOpn3	0.5	1	7500	0
MosOpn3	0.5	1	7600	0
MosOpn3	0.5	1	7700	0
MosOpn3	0.5	1	7800	0
MosOpn3	0.5	1	7900	0
MosOpn3	0.5	1	8000	0
MosOpn3	0.5	1	8100	0.277778
MosOpn3	0.5	1	8200	0.277778
MosOpn3	0.5	1	8300	0.277778
MosOpn3	0.5	1	8400	0.277778
MosOpn3	0.5	1	8500	0.277778
MosOpn3	0.5	1	8600	0.277778
MosOpn3	0.5	1	8700	0.277778
MosOpn3	0.5	1	8800	0.277778
MosOpn3	0.5	1	8900	0.277778
MosOpn3	0.5	1	9000	0.277778
MosOpn3	0.5	1	9100	0
MosOpn3	0.5	1	9200	0
MosOpn3	0.5	1	9300	0
MosOpn3	0.5	1	9400	0
MosOpn3	0.5	1	9500	0
MosOpn3	0.5	1	9600	0
MosOpn3	0.5	1	9700	0
MosOpn3	0.5	1	9800	0
MosOpn3	0.5	1	9900	0
MosOpn3	0.5	1	10000	0.277778
MosOpn3	0.5	1	10100	0.277778
MosOpn3	0.5	1	10200	0.277778
MosOpn3	0.5	1	10300	0.277778
MosOpn3	0.5	1	10400	0.277778
MosOpn3	0.5	1	10500	0.277778
MosOpn3	0.5	1	10600	0.277778
MosOpn3	0.5	1	10700	0.277778
MosOpn3	0.5	1	10800	0.277778
MosOpn3	0.5	1	10900	0.277778
MosOpn3	0.5	1	11000	0
MosOpn3	0.5	1	11100	0
MosOpn3	0.5	1	11200	0
MosOpn3	0.5	1	11300	0
MosOpn3	0.5	1	11400	0
MosOpn3	0.5	1	11500	0
MosOpn3	0.5	1	11600	0
MosOpn3	0.5	1	11700	0.277778
MosOpn3	0.5	1	11800	0.277778
MosOpn3	0.5	1	11900	0.277778
MosOpn3	0.5	1	12000	0.277778
MosOpn3	0.5	1	12100	0.277778
MosOpn3	0.5	1	12200	0.277778
MosOpn3	0.5	1	12300	0.277778
MosOpn3	0.5	1	12400	0.277778
MosOpn3	0.5	1	12500	0.277778
MosOpn3	0.5	1	12600	0.277778
MosOpn3	0.5	1	12700	0
MosOpn3	0.5	1	12800	0
MosOpn3	0.5	1	12900	0
MosOpn3	0.5	1	13000	0
MosOpn3	0.5	1	13100	0
MosOpn3	0.5	1	13200	0.277778
MosOpn3	0.5	1	13300	0.277778
MosOpn3	0.5	1	13400	0.277778
MosOpn3	0.5	1	13500	0.277778
MosOpn3	0.5	1	13600	0.277778
MosOpn3	0.5	1	13700	0.277778
MosOpn3	0.5	1	13800	0.277778
MosOpn3	0.5	1	13900	0.277778
MosOpn3	0.5	1	14000	0.277778
MosOpn3	0.5	1	14100	0.277778
MosOpn3	0.5	1	14200	0
MosOpn3	0.5	1	14300	0
MosOpn3	0.5	1	14400	0
MosOpn3	0.5	1	14500	0.277778
MosOpn3	0.5	1	14600	0.277778
MosOpn3	0.5	1	14700	0.277778
MosOpn3	0.5	1	14800	0.277778
MosOpn3	0.5	1	14900	0.277778
MosOpn3	0.5	1	15000	0.277778
MosOpn3	0.5	1	15100	0.277778
MosOpn3	0.5	1	15200	0.277778
MosOpn3	0.5	1	15300	0.277778
MosOpn3	0.5	1	15400	0.277778
MosOpn3	0.5	1	15500	0
MosOpn3	0.5	1	15600	0
MosOpn3	0.5	1	15700	0.277778
MosOpn3	0.5	1	15800	0.277778
MosOpn3	0.5	1	15900	0.277778
MosOpn3	0.5	1	16000	0.277778
MosOpn3	0.5	1	16100	0.277778
MosOpn3	0.5	1	16200	0.277778
MosOpn3	0.5	1	16300	0.277778
MosOpn3	0.5	1	16400	0.277778
MosOpn3	0.5	1	16500	0.277778
MosOpn3	0.5	1	16600	0.277778
MosOpn3	0.5	1	16700	0
MosOpn3	0.5	1	16800	0.277778
MosOpn3	0.5	1	16900	0.277778
MosOpn3	0.5	1	17000	0.277778
MosOpn3	0.5	1	17100	0.277778
MosOpn3	0.5	1	17200	0.277778
MosOpn3	0.5	1	17300	0.277778
MosOpn3	0.5	1	17400	0.277778
MosOpn3	0.5	1	17500	0.277778
MosOpn3	0.5	1	17600	0.277778
MosOpn3	0.5	1	17700	0.277778
MosOpn3	0.5	1	17800	0.277778
MosOpn3	0.5	1	17900	0.277778
MosOpn3	0.5	1	18000	0.277778
MosOpn3	0.5	1	18100	0.277778
MosOpn3	0.5	1	18200	0.277778
MosOpn3	0.5	1	18300	0.277778
MosOpn3	0.5	1	18400	0.277778
MosOpn3	0.5	1	18500	0.277778
MosOpn3	0.5	1	18600	0.277778
MosOpn3	0.5	1	18700	0.277778
MosOpn3	0.5	1	18800	0
MosOpn3	0.5	1	18900	0.277778
MosOpn3	0.5	1	19000	0.277778
MosOpn3	0.5	1	19100	0.277778
MosOpn3	0.5	1	19200	0.277778
MosOpn3	0.5	1	19300	0.277778
MosOpn3	0.5	1	19400	0.277778
MosOpn3	0.5	1	19500	0.277778
MosOpn3	0.5	1	19600	0.277778
MosOpn3	0.5	1	19700	0.277778
MosOpn3	0.5	1	19800	0.277778
MosOpn3	0.5	1	19900	0.277778
MosOpn3	0.5	1	20000	0.277778
MosOpn3	0.5	1	20100	0.277778
MosOpn3	0.5	1	20200	0.277778
MosOpn3	0.5	1	20300	0.277778
MosOpn3	0.5	1	20400	0.277778
MosOpn3	0.5	1	20500	0.277778
MosOpn3	0.5	1	20600	0.277778
MosOpn3	0.5	1	20700	0.277778
MosOpn3	0.5	1	20800	0.277778
MosOpn3	0.5	1	20900	0.277778
MosOpn3	0.5	1	21000	0.277778
MosOpn3	0.5	1	21100	0.277778
MosOpn3	0.5	1	21200	0.277778
MosOpn3	0.5	1	21300	0.277778
MosOpn3	0.5	1	21400	0.277778
MosOpn3	0.5	1	21500	0.277778
MosOpn3	0.5	1	21600	0.277778
MosOpn3	0.5	1	21700	0.277778
MosOpn3	0.5	1	21800	0.555556
MosOpn3	0.5	1	21900	0.277778
MosOpn3	0.5	1	22000	0.277778
MosOpn3	0.5	1	22100	0.277778
MosOpn3	0.5	1	22200	0.277778
MosOpn3	0.5	1	22300	0.277778
MosOpn3	0.5	1	22400	0.277778
MosOpn3	0.5	1	22500	0.277778
MosOpn3	0.5	1	22600	0.277778
MosOpn3	0.5	1	22700	0.277778
MosOpn3	0.5	1	22800	0.277778
MosOpn3	0.5	1	22900	0.277778
MosOpn3	0.5	1	23000	0.277778
MosOpn3	0.5	1	23100	0.277778
MosOpn3	0.5	1	23200	0.277778
MosOpn3	0.5	1	23300	0.277778
MosOpn3	0.5	1	23400	0.277778
MosOpn3	0.5	1	23500	0.277778
MosOpn3	0.5	1	23600	0.277778
MosOpn3	0.5	1	23700	0.555556
MosOpn3	0.5	1	23800	0.277778
MosOpn3	0.5	1	23900	0.277778
MosOpn3	0.5	1	24000	0.277778
MosOpn3	0.5	1	24100	0.277778
MosOpn3	0.5	1	24200	0.277778
MosOpn3	0.5	1	24300	0.277778
MosOpn3	0.5	1	24400	0.277778
MosOpn3	0.5	1	24500	0.555556
MosOpn3	0.5	1	24600	0.555556
MosOpn3	0.5	1	24700	0.277778
MosOpn3	0.5	1	24800	0.277778
MosOpn3	0.5	1	24900	0.277778
MosOpn3	0.5	1	25000	0.277778
MosOpn3	0.5	1	25100	0.277778
MosOpn3	0.5	1	25200	0.277778
MosOpn3	0.5	1	25300	0.277778
MosOpn3	0.5	1	25400	0.555556
MosOpn3	0.5	1	25500	0.277778
MosOpn3	0.5	1	25600	0.277778
MosOpn3	0.5	1	25700	0.277778
MosOpn3	0.5	1	25800	0.277778
MosOpn3	0.5	1	25900	0.277778
MosOpn3	0.5	1	26000	0.277778
MosOpn3	0.5	1	26100	0.277778
MosOpn3	0.5	1	26200	0.277778
MosOpn3	0.5	1	26300	0.277778
MosOpn3	0.5	1	26400	0.277778
MosOpn3	0.5	1	26500	0.277778
MosOpn3	0.5	1	26600	0.277778
MosOpn3	0.5	1	26700	0.277778
MosOpn3	0.5	1	26800	0.277778
MosOpn3	0.5	1	26900	0.277778
MosOpn3	0.5	1	27000	0.277778
MosOpn3	0.5	1	27100	0.277778
MosOpn3	0.5	1	27200	0.555556
MosOpn3	0.5	1	27300	0.555556
MosOpn3	0.5	1	27400	0.277778
MosOpn3	0.5	1	27500	0.277778
MosOpn3	0.5	1	27600	0.277778
MosOpn3	0.5	1	27700	0.277778
MosOpn3	0.5	1	27800	0.277778
MosOpn3	0.5	1	27900	0.277778
MosOpn3	0.5	1	28000	0.277778
MosOpn3	0.5	1	28100	0.555556
MosOpn3	0.5	1	28200	0.277778
MosOpn3	0.5	1	28300	0.277778
MosOpn3	0.5	1	28400	0.277778
MosOpn3	0.5	1	28500	0.277778
MosOpn3	0.5	1	28600	0.277778
MosOpn3	0.5	1	28700	0.277778
MosOpn3	0.5	1	28800	0.277778
MosOpn3	0.5	1	28900	0.277778
MosOpn3	0.5	1	29000	0.555556
MosOpn3	0.5	1	29100	0.277778
MosOpn3	0.5	1	29200	0.277778
MosOpn3	0.5	1	29300	0.277778
MosOpn3	0.5	1	29400	0.277778
MosOpn3	0.5	1	29500	0.277778
MosOpn3	0.5	1	29600	0.277778
MosOpn3	0.5	1	29700	0.277778
MosOpn3	0.5	1	29800	0.555556
MosOpn3	0.5	1	29900	0.555556
MosOpn3	0.5	1	30000	0.277778
MosOpn3	0.5	1	30100	0.277778
MosOpn3	0.5	1	30200	0.277778
MosOpn3	0.5	1	30300	0.277778
MosOpn3	0.5	1	30400	0.277778
MosOpn3	0.5	1	30500	0.277778
MosOpn3	0.5	1	30600	0.555556
MosOpn3	0.5	1	30700	0.555556
MosOpn3	0.5	1	30800	0.277778
MosOpn3	0.5	1	30900	0.277778
MosOpn3	0.5	1	31000	0.277778
MosOpn3	0.5	1	31100	0.277778
MosOpn3	0.5	1	31200	0.277778
MosOpn3	0.5	1	31300	0.277778
MosOpn3	0.5	1	31400	0.277778
MosOpn3	0.5	1	31500	0.555556
MosOpn3	0.5	1	31600	0.277778
MosOpn3	0.5	1	31700	0.277778
MosOpn3	0.5	1	31800	0.277778
MosOpn3	0.5	1	31900	0.277778
MosOpn3	0.5	1	32000	0.277778
MosOpn3	0.5	1	32100	0.277778
MosOpn3	0.5	1	32200	0.277778
MosOpn3	0.5	1	32300	0.555556
MosOpn3	0.5	1	32400	0.555556
MosOpn3	0.5	1	32500	0.277778
MosOpn3	0.5	1	32600	0.277778
MosOpn3	0.5	1	32700	0.277778
MosOpn3	0.5	1	32800	0.277778
MosOpn3	0.5	1	32900	0.277778
MosOpn3	0.5	1	33000	0.277778
MosOpn3	0.5	1	33100	0.277778
MosOpn3	0.5	1	33200	0.555556
MosOpn3	0.5	1	33300	0.277778
MosOpn3	0.5	1	33400	0.277778
MosOpn3	0.5	1	33500	0.277778
MosOpn3	0.5	1	33600	0.277778
MosOpn3	0.5	1	33700	0.277778
MosOpn3	0.5	1	33800	0.277778
MosOpn3	0.5	1	33900	0.555556
MosOpn3	0.5	1	34000	0.555556
MosOpn3	0.5	1	34100	0.555556
MosOpn3	0.5	1	34200	0.277778
MosOpn3	0.5	1	34300	0.277778
MosOpn3	0.5	1	34400	0.277778
MosOpn3	0.5	1	34500	0.277778
MosOpn3	0.5	2	-9500	0.47619
MosOpn3	0.5	2	-9400	0.47619
MosOpn3	0.5	2	-9300	0.47619
MosOpn3	0.5	2	-9200	0.714286
MosOpn3	0.5	2	-9100	0.714286
MosOpn3	0.5	2	-9000	0.952381
MosOpn3	0.5	2	-8900	0.714286
MosOpn3	0.5	2	-8800	0.714286
MosOpn3	0.5	2	-8700	0.952381
MosOpn3	0.5	2	-8600	0.952381
MosOpn3	0.5	2	-8500	1.19048
MosOpn3	0.5	2	-8400	0.952381
MosOpn3	0.5	2	-8300	1.19048
MosOpn3	0.5	2	-8200	0.952381
MosOpn3	0.5	2	-8100	1.19048
MosOpn3	0.5	2	-8000	0.952381
MosOpn3	0.5	2	-7900	0.952381
MosOpn3	0.5	2	-7800	1.19048
MosOpn3	0.5	2	-7700	0.952381
MosOpn3	0.5	2	-7600	1.19048
MosOpn3	0.5	2	-7500	0.952381
MosOpn3	0.5	2	-7400	1.19048
MosOpn3	0.5	2	-7300	0.952381
MosOpn3	0.5	2	-7200	0.952381
MosOpn3	0.5	2	-7100	0.952381
MosOpn3	0.5	2	-7000	0.952381
MosOpn3	0.5	2	-6900	1.19048
MosOpn3	0.5	2	-6800	0.952381
MosOpn3	0.5	2	-6700	1.19048
MosOpn3	0.5	2	-6600	0.952381
MosOpn3	0.5	2	-6500	1.19048
MosOpn3	0.5	2	-6400	0.952381
MosOpn3	0.5	2	-6300	0.952381
MosOpn3	0.5	2	-6200	1.19048
MosOpn3	0.5	2	-6100	0.952381
MosOpn3	0.5	2	-6000	1.19048
MosOpn3	0.5	2	-5900	0.952381
MosOpn3	0.5	2	-5800	1.19048
MosOpn3	0.5	2	-5700	0.952381
MosOpn3	0.5	2	-5600	0.952381
MosOpn3	0.5	2	-5500	0.952381
MosOpn3	0.5	2	-5400	0.952381
MosOpn3	0.5	2	-5300	1.19048
MosOpn3	0.5	2	-5200	0.952381
MosOpn3	0.5	2	-5100	1.19048
MosOpn3	0.5	2	-5000	0.952381
MosOpn3	0.5	2	-4900	1.19048
MosOpn3	0.5	2	-4800	0.952381
MosOpn3	0.5	2	-4700	0.952381
MosOpn3	0.5	2	-4600	1.19048
MosOpn3	0.5	2	-4500	0.952381
MosOpn3	0.5	2	-4400	1.19048
MosOpn3	0.5	2	-4300	0.952381
MosOpn3	0.5	2	-4200	1.19048
MosOpn3	0.5	2	-4100	0.952381
MosOpn3	0.5	2	-4000	0.952381
MosOpn3	0.5	2	-3900	0.952381
MosOpn3	0.5	2	-3800	0.952381
MosOpn3	0.5	2	-3700	1.19048
MosOpn3	0.5	2	-3600	0.952381
MosOpn3	0.5	2	-3500	1.19048
MosOpn3	0.5	2	-3400	0.952381
MosOpn3	0.5	2	-3300	1.19048
MosOpn3	0.5	2	-3200	0.952381
MosOpn3	0.5	2	-3100	1.19048
MosOpn3	0.5	2	-3000	1.19048
MosOpn3	0.5	2	-2900	0.952381
MosOpn3	0.5	2	-2800	1.19048
MosOpn3	0.5	2	-2700	0.952381
MosOpn3	0.5	2	-2600	1.19048
MosOpn3	0.5	2	-2500	0.952381
MosOpn3	0.5	2	-2400	0.952381
MosOpn3	0.5	2	-2300	0.952381
MosOpn3	0.5	2	-2200	0.952381
MosOpn3	0.5	2	-2100	0.952381
MosOpn3	0.5	2	-2000	0.952381
MosOpn3	0.5	2	-1900	1.19048
MosOpn3	0.5	2	-1800	0.952381
MosOpn3	0.5	2	-1700	1.19048
MosOpn3	0.5	2	-1600	0.952381
MosOpn3	0.5	2	-1500	0.952381
MosOpn3	0.5	2	-1400	1.19048
MosOpn3	0.5	2	-1300	0.952381
MosOpn3	0.5	2	-1200	1.19048
MosOpn3	0.5	2	-1100	0.952381
MosOpn3	0.5	2	-1000	1.19048
MosOpn3	0.5	2	-900	0.952381
MosOpn3	0.5	2	-800	0.952381
MosOpn3	0.5	2	-700	0.952381
MosOpn3	0.5	2	-600	0.952381
MosOpn3	0.5	2	-500	1.19048
MosOpn3	0.5	2	-400	0.952381
MosOpn3	0.5	2	-300	1.19048
MosOpn3	0.5	2	-200	0.952381
MosOpn3	0.5	2	-100	0.952381
MosOpn3	0.5	2	0	0.952381
MosOpn3	0.5	2	100	0.952381
MosOpn3	0.5	2	200	0.952381
MosOpn3	0.5	2	300	0.714286
MosOpn3	0.5	2	400	0.714286
MosOpn3	0.5	2	500	0.47619
MosOpn3	0.5	2	600	0.47619
MosOpn3	0.5	2	700	0.238095
MosOpn3	0.5	2	800	0.238095
MosOpn3	0.5	2	900	0.238095
MosOpn3	0.5	2	1000	0
MosOpn3	0.5	2	1100	0
MosOpn3	0.5	2	1200	0
MosOpn3	0.5	2	1300	0
MosOpn3	0.5	2	1400	0
MosOpn3	0.5	2	1500	0
MosOpn3	0.5	2	1600	0
MosOpn3	0.5	2	1700	0
MosOpn3	0.5	2	1800	0
MosOpn3	0.5	2	1900	0
MosOpn3	0.5	2	2000	0
MosOpn3	0.5	2	2100	0
MosOpn3	0.5	2	2200	0
MosOpn3	0.5	2	2300	0
MosOpn3	0.5	2	2400	0
MosOpn3	0.5	2	2500	0
MosOpn3	0.5	2	2600	0
MosOpn3	0.5	2	2700	0
MosOpn3	0.5	2	2800	0
MosOpn3	0.5	2	2900	0
MosOpn3	0.5	2	3000	0
MosOpn3	0.5	2	3100	0
MosOpn3	0.5	2	3200	0
MosOpn3	0.5	2	3300	0
MosOpn3	0.5	2	3400	0
MosOpn3	0.5	2	3500	0
MosOpn3	0.5	2	3600	0
MosOpn3	0.5	2	3700	0
MosOpn3	0.5	2	3800	0
MosOpn3	0.5	2	3900	0
MosOpn3	0.5	2	4000	0
MosOpn3	0.5	2	4100	0
MosOpn3	0.5	2	4200	0
MosOpn3	0.5	2	4300	0
MosOpn3	0.5	2	4400	0
MosOpn3	0.5	2	4500	0
MosOpn3	0.5	2	4600	0
MosOpn3	0.5	2	4700	0
MosOpn3	0.5	2	4800	0
MosOpn3	0.5	2	4900	0
MosOpn3	0.5	2	5000	0
MosOpn3	0.5	2	5100	0
MosOpn3	0.5	2	5200	0
MosOpn3	0.5	2	5300	0
MosOpn3	0.5	2	5400	0
MosOpn3	0.5	2	5500	0
MosOpn3	0.5	2	5600	0
MosOpn3	0.5	2	5700	0
MosOpn3	0.5	2	5800	0
MosOpn3	0.5	2	5900	0
MosOpn3	0.5	2	6000	0
MosOpn3	0.5	2	6100	0
MosOpn3	0.5	2	6200	0
MosOpn3	0.5	2	6300	0
MosOpn3	0.5	2	6400	0
MosOpn3	0.5	2	6500	0
MosOpn3	0.5	2	6600	0
MosOpn3	0.5	2	6700	0
MosOpn3	0.5	2	6800	0
MosOpn3	0.5	2	6900	0
MosOpn3	0.5	2	7000	0
MosOpn3	0.5	2	7100	0
MosOpn3	0.5	2	7200	0
MosOpn3	0.5	2	7300	0
MosOpn3	0.5	2	7400	0
MosOpn3	0.5	2	7500	0
MosOpn3	0.5	2	7600	0
MosOpn3	0.5	2	7700	0
MosOpn3	0.5	2	7800	0
MosOpn3	0.5	2	7900	0
MosOpn3	0.5	2	8000	0
MosOpn3	0.5	2	8100	0
MosOpn3	0.5	2	8200	0
MosOpn3	0.5	2	8300	0
MosOpn3	0.5	2	8400	0
MosOpn3	0.5	2	8500	0
MosOpn3	0.5	2	8600	0
MosOpn3	0.5	2	8700	0
MosOpn3	0.5	2	8800	0
MosOpn3	0.5	2	8900	0
MosOpn3	0.5	2	9000	0
MosOpn3	0.5	2	9100	0
MosOpn3	0.5	2	9200	0
MosOpn3	0.5	2	9300	0
MosOpn3	0.5	2	9400	0
MosOpn3	0.5	2	9500	0
MosOpn3	0.5	2	9600	0
MosOpn3	0.5	2	9700	0
MosOpn3	0.5	2	9800	0
MosOpn3	0.5	2	9900	0.238095
MosOpn3	0.5	2	10000	0.238095
MosOpn3	0.5	2	10100	0.238095
MosOpn3	0.5	2	10200	0.238095
MosOpn3	0.5	2	10300	0.238095
MosOpn3	0.5	2	10400	0.238095
MosOpn3	0.5	2	10500	0.238095
MosOpn3	0.5	2	10600	0.238095
MosOpn3	0.5	2	10700	0.238095
MosOpn3	0.5	2	10800	0.238095
MosOpn3	0.5	2	10900	0
MosOpn3	0.5	2	11000	0
MosOpn3	0.5	2	11100	0
MosOpn3	0.5	2	11200	0
MosOpn3	0.5	2	11300	0
MosOpn3	0.5	2	11400	0
MosOpn3	0.5	2	11500	0
MosOpn3	0.5	2	11600	0
MosOpn3	0.5	2	11700	0
MosOpn3	0.5	2	11800	0
MosOpn3	0.5	2	11900	0
MosOpn3	0.5	2	12000	0
MosOpn3	0.5	2	12100	0
MosOpn3	0.5	2	12200	0
MosOpn3	0.5	2	12300	0
MosOpn3	0.5	2	12400	0
MosOpn3	0.5	2	12500	0
MosOpn3	0.5	2	12600	0
MosOpn3	0.5	2	12700	0
MosOpn3	0.5	2	12800	0
MosOpn3	0.5	2	12900	0
MosOpn3	0.5	2	13000	0
MosOpn3	0.5	2	13100	0
MosOpn3	0.5	2	13200	0
MosOpn3	0.5	2	13300	0
MosOpn3	0.5	2	13400	0.238095
MosOpn3	0.5	2	13500	0.238095
MosOpn3	0.5	2	13600	0.238095
MosOpn3	0.5	2	13700	0.238095
MosOpn3	0.5	2	13800	0.238095
MosOpn3	0.5	2	13900	0.238095
MosOpn3	0.5	2	14000	0.238095
MosOpn3	0.5	2	14100	0.238095
MosOpn3	0.5	2	14200	0.238095
MosOpn3	0.5	2	14300	0.238095
MosOpn3	0.5	2	14400	0
MosOpn3	0.5	2	14500	0
MosOpn3	0.5	2	14600	0
MosOpn3	0.5	2	14700	0
MosOpn3	0.5	2	14800	0
MosOpn3	0.5	2	14900	0
MosOpn3	0.5	2	15000	0
MosOpn3	0.5	2	15100	0
MosOpn3	0.5	2	15200	0
MosOpn3	0.5	2	15300	0
MosOpn3	0.5	2	15400	0
MosOpn3	0.5	2	15500	0
MosOpn3	0.5	2	15600	0
MosOpn3	0.5	2	15700	0
MosOpn3	0.5	2	15800	0
MosOpn3	0.5	2	15900	0.238095
MosOpn3	0.5	2	16000	0.238095
MosOpn3	0.5	2	16100	0.238095
MosOpn3	0.5	2	16200	0.238095
MosOpn3	0.5	2	16300	0.238095
MosOpn3	0.5	2	16400	0.238095
MosOpn3	0.5	2	16500	0.238095
MosOpn3	0.5	2	16600	0.238095
MosOpn3	0.5	2	16700	0.238095
MosOpn3	0.5	2	16800	0.238095
MosOpn3	0.5	2	16900	0
MosOpn3	0.5	2	17000	0
MosOpn3	0.5	2	17100	0
MosOpn3	0.5	2	17200	0
MosOpn3	0.5	2	17300	0
MosOpn3	0.5	2	17400	0
MosOpn3	0.5	2	17500	0
MosOpn3	0.5	2	17600	0
MosOpn3	0.5	2	17700	0
MosOpn3	0.5	2	17800	0
MosOpn3	0.5	2	17900	0.238095
MosOpn3	0.5	2	18000	0.238095
MosOpn3	0.5	2	18100	0.238095
MosOpn3	0.5	2	18200	0.238095
MosOpn3	0.5	2	18300	0.238095
MosOpn3	0.5	2	18400	0.238095
MosOpn3	0.5	2	18500	0.238095
MosOpn3	0.5	2	18600	0.238095
MosOpn3	0.5	2	18700	0.238095
MosOpn3	0.5	2	18800	0.238095
MosOpn3	0.5	2	18900	0.238095
MosOpn3	0.5	2	19000	0.238095
MosOpn3	0.5	2	19100	0.238095
MosOpn3	0.5	2	19200	0.238095
MosOpn3	0.5	2	19300	0.238095
MosOpn3	0.5	2	19400	0.238095
MosOpn3	0.5	2	19500	0.238095
MosOpn3	0.5	2	19600	0.238095
MosOpn3	0.5	2	19700	0.238095
MosOpn3	0.5	2	19800	0.47619
MosOpn3	0.5	2	19900	0.238095
MosOpn3	0.5	2	20000	0.238095
MosOpn3	0.5	2	20100	0.238095
MosOpn3	0.5	2	20200	0.238095
MosOpn3	0.5	2	20300	0.238095
MosOpn3	0.5	2	20400	0.238095
MosOpn3	0.5	2	20500	0.238095
MosOpn3	0.5	2	20600	0.47619
MosOpn3	0.5	2	20700	0.47619
MosOpn3	0.5	2	20800	0.238095
MosOpn3	0.5	2	20900	0.238095
MosOpn3	0.5	2	21000	0.238095
MosOpn3	0.5	2	21100	0.238095
MosOpn3	0.5	2	21200	0.238095
MosOpn3	0.5	2	21300	0.238095
MosOpn3	0.5	2	21400	0.238095
MosOpn3	0.5	2	21500	0.47619
MosOpn3	0.5	2	21600	0.238095
MosOpn3	0.5	2	21700	0.238095
MosOpn3	0.5	2	21800	0.238095
MosOpn3	0.5	2	21900	0.238095
MosOpn3	0.5	2	22000	0.238095
MosOpn3	0.5	2	22100	0.238095
MosOpn3	0.5	2	22200	0.238095
MosOpn3	0.5	2	22300	0.47619
MosOpn3	0.5	2	22400	0.47619
MosOpn3	0.5	2	22500	0.238095
MosOpn3	0.5	2	22600	0.238095
MosOpn3	0.5	2	22700	0.238095
MosOpn3	0.5	2	22800	0.238095
MosOpn3	0.5	2	22900	0.238095
MosOpn3	0.5	2	23000	0.47619
MosOpn3	0.5	2	23100	0.47619
MosOpn3	0.5	2	23200	0.47619
MosOpn3	0.5	2	23300	0.238095
MosOpn3	0.5	2	23400	0.238095
MosOpn3	0.5	2	23500	0.238095
MosOpn3	0.5	2	23600	0.238095
MosOpn3	0.5	2	23700	0.238095
MosOpn3	0.5	2	23800	0.47619
MosOpn3	0.5	2	23900	0.47619
MosOpn3	0.5	2	24000	0.238095
MosOpn3	0.5	2	24100	0.238095
MosOpn3	0.5	2	24200	0.238095
MosOpn3	0.5	2	24300	0.238095
MosOpn3	0.5	2	24400	0.238095
MosOpn3	0.5	2	24500	0.47619
MosOpn3	0.5	2	24600	0.47619
MosOpn3	0.5	2	24700	0.47619
MosOpn3	0.5	2	24800	0.238095
MosOpn3	0.5	2	24900	0.238095
MosOpn3	0.5	2	25000	0.238095
MosOpn3	0.5	2	25100	0.238095
MosOpn3	0.5	2	25200	0.47619
MosOpn3	0.5	2	25300	0.47619
MosOpn3	0.5	2	25400	0.47619
MosOpn3	0.5	2	25500	0.238095
MosOpn3	0.5	2	25600	0.238095
MosOpn3	0.5	2	25700	0.238095
MosOpn3	0.5	2	25800	0.238095
MosOpn3	0.5	2	25900	0.47619
MosOpn3	0.5	2	26000	0.47619
MosOpn3	0.5	2	26100	0.47619
MosOpn3	0.5	2	26200	0.238095
MosOpn3	0.5	2	26300	0.238095
MosOpn3	0.5	2	26400	0.238095
MosOpn3	0.5	2	26500	0.238095
MosOpn3	0.5	2	26600	0.47619
MosOpn3	0.5	2	26700	0.47619
MosOpn3	0.5	2	26800	0.47619
MosOpn3	0.5	2	26900	0.238095
MosOpn3	0.5	2	27000	0.238095
MosOpn3	0.5	2	27100	0.238095
MosOpn3	0.5	2	27200	0.238095
MosOpn3	0.5	2	27300	0.47619
MosOpn3	0.5	2	27400	0.47619
MosOpn3	0.5	2	27500	0.47619
MosOpn3	0.5	2	27600	0.238095
MosOpn3	0.5	2	27700	0.238095
MosOpn3	0.5	2	27800	0.238095
MosOpn3	0.5	2	27900	0.47619
MosOpn3	0.5	2	28000	0.47619
MosOpn3	0.5	2	28100	0.47619
MosOpn3	0.5	2	28200	0.47619
MosOpn3	0.5	2	28300	0.238095
MosOpn3	0.5	2	28400	0.238095
MosOpn3	0.5	2	28500	0.238095
MosOpn3	0.5	2	28600	0.47619
MosOpn3	0.5	2	28700	0.47619
MosOpn3	0.5	2	28800	0.47619
MosOpn3	0.5	2	28900	0.238095
MosOpn3	0.5	2	29000	0.238095
MosOpn3	0.5	2	29100	0.238095
MosOpn3	0.5	2	29200	0.238095
MosOpn3	0.5	2	29300	0.47619
MosOpn3	0.5	2	29400	0.47619
MosOpn3	0.5	2	29500	0.47619
MosOpn3	0.5	2	29600	0.238095
MosOpn3	0.5	2	29700	0.238095
MosOpn3	0.5	2	29800	0.238095
MosOpn3	0.5	2	29900	0.47619
MosOpn3	0.5	2	30000	0.47619
MosOpn3	0.5	2	30100	0.47619
MosOpn3	0.5	2	30200	0.47619
MosOpn3	0.5	2	30300	0.238095
MosOpn3	0.5	2	30400	0.238095
MosOpn3	0.5	2	30500	0.47619
MosOpn3	0.5	2	30600	0.47619
MosOpn3	0.5	2	30700	0.47619
MosOpn3	0.5	2	30800	0.47619
MosOpn3	0.5	2	30900	0.238095
MosOpn3	0.5	2	31000	0.238095
MosOpn3	0.5	2	31100	0.238095
MosOpn3	0.5	2	31200	0.47619
MosOpn3	0.5	2	31300	0.47619
MosOpn3	0.5	2	31400	0.47619
MosOpn3	0.5	2	31500	0.238095
MosOpn3	0.5	2	31600	0.238095
MosOpn3	0.5	2	31700	0.238095
MosOpn3	0.5	2	31800	0.47619
MosOpn3	0.5	2	31900	0.47619
MosOpn3	0.5	2	32000	0.47619
MosOpn3	0.5	2	32100	0.47619
MosOpn3	0.5	2	32200	0.238095
MosOpn3	0.5	2	32300	0.238095
MosOpn3	0.5	2	32400	0.47619
MosOpn3	0.5	2	32500	0.47619
MosOpn3	0.5	2	32600	0.47619
MosOpn3	0.5	2	32700	0.47619
MosOpn3	0.5	2	32800	0.238095
MosOpn3	0.5	2	32900	0.238095
MosOpn3	0.5	2	33000	0.47619
MosOpn3	0.5	2	33100	0.47619
MosOpn3	0.5	2	33200	0.47619
MosOpn3	0.5	2	33300	0.47619
MosOpn3	0.5	2	33400	0.238095
MosOpn3	0.5	2	33500	0.238095
MosOpn3	0.5	2	33600	0.47619
MosOpn3	0.5	2	33700	0.47619
MosOpn3	0.5	2	33800	0.47619
MosOpn3	0.5	2	33900	0.47619
MosOpn3	0.5	2	34000	0.238095
MosOpn3	0.5	2	34100	0.238095
MosOpn3	0.5	2	34200	0.47619
MosOpn3	0.5	2	34300	0.47619
MosOpn3	0.5	2	34400	0.47619
MosOpn3	0.5	2	34500	0.47619
MosOpn3	0.5	2	-9500	0.714286
MosOpn3	0.5	2	-9400	0.714286
MosOpn3	0.5	2	-9300	0.714286
MosOpn3	0.5	2	-9200	0.714286
MosOpn3	0.5	2	-9100	0.952381
MosOpn3	0.5	2	-9000	0.952381
MosOpn3	0.5	2	-8900	1.19048
MosOpn3	0.5	2	-8800	0.952381
MosOpn3	0.5	2	-8700	1.19048
MosOpn3	0.5	2	-8600	0.952381
MosOpn3	0.5	2	-8500	1.19048
MosOpn3	0.5	2	-8400	0.952381
MosOpn3	0.5	2	-8300	0.952381
MosOpn3	0.5	2	-8200	1.19048
MosOpn3	0.5	2	-8100	1.19048
MosOpn3	0.5	2	-8000	1.19048
MosOpn3	0.5	2	-7900	1.19048
MosOpn3	0.5	2	-7800	1.19048
MosOpn3	0.5	2	-7700	0.952381
MosOpn3	0.5	2	-7600	0.952381
MosOpn3	0.5	2	-7500	0.952381
MosOpn3	0.5	2	-7400	0.952381
MosOpn3	0.5	2	-7300	1.19048
MosOpn3	0.5	2	-7200	0.952381
MosOpn3	0.5	2	-7100	0.952381
MosOpn3	0.5	2	-7000	0.952381
MosOpn3	0.5	2	-6900	0.952381
MosOpn3	0.5	2	-6800	0.952381
MosOpn3	0.5	2	-6700	0.952381
MosOpn3	0.5	2	-6600	1.19048
MosOpn3	0.5	2	-6500	0.952381
MosOpn3	0.5	2	-6400	1.19048
MosOpn3	0.5	2	-6300	0.952381
MosOpn3	0.5	2	-6200	1.19048
MosOpn3	0.5	2	-6100	0.952381
MosOpn3	0.5	2	-6000	0.952381
MosOpn3	0.5	2	-5900	0.952381
MosOpn3	0.5	2	-5800	0.952381
MosOpn3	0.5	2	-5700	1.19048
MosOpn3	0.5	2	-5600	0.952381
MosOpn3	0.5	2	-5500	1.19048
MosOpn3	0.5	2	-5400	0.952381
MosOpn3	0.5	2	-5300	0.952381
MosOpn3	0.5	2	-5200	0.952381
MosOpn3	0.5	2	-5100	0.952381
MosOpn3	0.5	2	-5000	1.19048
MosOpn3	0.5	2	-4900	0.952381
MosOpn3	0.5	2	-4800	1.19048
MosOpn3	0.5	2	-4700	0.952381
MosOpn3	0.5	2	-4600	1.19048
MosOpn3	0.5	2	-4500	0.952381
MosOpn3	0.5	2	-4400	0.952381
MosOpn3	0.5	2	-4300	1.19048
MosOpn3	0.5	2	-4200	0.952381
MosOpn3	0.5	2	-4100	1.19048
MosOpn3	0.5	2	-4000	0.952381
MosOpn3	0.5	2	-3900	1.19048
MosOpn3	0.5	2	-3800	0.952381
MosOpn3	0.5	2	-3700	0.952381
MosOpn3	0.5	2	-3600	0.952381
MosOpn3	0.5	2	-3500	0.952381
MosOpn3	0.5	2	-3400	1.19048
MosOpn3	0.5	2	-3300	0.952381
MosOpn3	0.5	2	-3200	1.19048
MosOpn3	0.5	2	-3100	0.952381
MosOpn3	0.5	2	-3000	1.19048
MosOpn3	0.5	2	-2900	0.952381
MosOpn3	0.5	2	-2800	0.952381
MosOpn3	0.5	2	-2700	1.19048
MosOpn3	0.5	2	-2600	0.952381
MosOpn3	0.5	2	-2500	1.19048
MosOpn3	0.5	2	-2400	0.952381
MosOpn3	0.5	2	-2300	0.952381
MosOpn3	0.5	2	-2200	0.952381
MosOpn3	0.5	2	-2100	0.952381
MosOpn3	0.5	2	-2000	0.952381
MosOpn3	0.5	2	-1900	0.952381
MosOpn3	0.5	2	-1800	1.19048
MosOpn3	0.5	2	-1700	0.952381
MosOpn3	0.5	2	-1600	1.19048
MosOpn3	0.5	2	-1500	0.952381
MosOpn3	0.5	2	-1400	1.19048
MosOpn3	0.5	2	-1300	1.19048
MosOpn3	0.5	2	-1200	0.952381
MosOpn3	0.5	2	-1100	1.19048
MosOpn3	0.5	2	-1000	0.952381
MosOpn3	0.5	2	-900	1.19048
MosOpn3	0.5	2	-800	0.952381
MosOpn3	0.5	2	-700	1.19048
MosOpn3	0.5	2	-600	0.952381
MosOpn3	0.5	2	-500	0.952381
MosOpn3	0.5	2	-400	0.952381
MosOpn3	0.5	2	-300	0.952381
MosOpn3	0.5	2	-200	1.19048
MosOpn3	0.5	2	-100	0.952381
MosOpn3	0.5	2	0	0.952381
MosOpn3	0.5	2	100	0.714286
MosOpn3	0.5	2	200	0.714286
MosOpn3	0.5	2	300	0.47619
MosOpn3	0.5	2	400	0.47619
MosOpn3	0.5	2	500	0.47619
MosOpn3	0.5	2	600	0.238095
MosOpn3	0.5	2	700	0.238095
MosOpn3	0.5	2	800	0
MosOpn3	0.5	2	900	0
MosOpn3	0.5	2	1000	0
MosOpn3	0.5	2	1100	0
MosOpn3	0.5	2	1200	0
MosOpn3	0.5	2	1300	0
MosOpn3	0.5	2	1400	0
MosOpn3	0.5	2	1500	0
MosOpn3	0.5	2	1600	0
MosOpn3	0.5	2	1700	0
MosOpn3	0.5	2	1800	0
MosOpn3	0.5	2	1900	0
MosOpn3	0.5	2	2000	0
MosOpn3	0.5	2	2100	0
MosOpn3	0.5	2	2200	0
MosOpn3	0.5	2	2300	0
MosOpn3	0.5	2	2400	0
MosOpn3	0.5	2	2500	0
MosOpn3	0.5	2	2600	0
MosOpn3	0.5	2	2700	0
MosOpn3	0.5	2	2800	0
MosOpn3	0.5	2	2900	0
MosOpn3	0.5	2	3000	0
MosOpn3	0.5	2	3100	0
MosOpn3	0.5	2	3200	0
MosOpn3	0.5	2	3300	0
MosOpn3	0.5	2	3400	0
MosOpn3	0.5	2	3500	0
MosOpn3	0.5	2	3600	0
MosOpn3	0.5	2	3700	0
MosOpn3	0.5	2	3800	0
MosOpn3	0.5	2	3900	0
MosOpn3	0.5	2	4000	0
MosOpn3	0.5	2	4100	0
MosOpn3	0.5	2	4200	0
MosOpn3	0.5	2	4300	0
MosOpn3	0.5	2	4400	0
MosOpn3	0.5	2	4500	0
MosOpn3	0.5	2	4600	0
MosOpn3	0.5	2	4700	0
MosOpn3	0.5	2	4800	0
MosOpn3	0.5	2	4900	0
MosOpn3	0.5	2	5000	0
MosOpn3	0.5	2	5100	0
MosOpn3	0.5	2	5200	0
MosOpn3	0.5	2	5300	0
MosOpn3	0.5	2	5400	0
MosOpn3	0.5	2	5500	0
MosOpn3	0.5	2	5600	0
MosOpn3	0.5	2	5700	0
MosOpn3	0.5	2	5800	0
MosOpn3	0.5	2	5900	0
MosOpn3	0.5	2	6000	0
MosOpn3	0.5	2	6100	0
MosOpn3	0.5	2	6200	0
MosOpn3	0.5	2	6300	0
MosOpn3	0.5	2	6400	0
MosOpn3	0.5	2	6500	0
MosOpn3	0.5	2	6600	0
MosOpn3	0.5	2	6700	0
MosOpn3	0.5	2	6800	0
MosOpn3	0.5	2	6900	0
MosOpn3	0.5	2	7000	0
MosOpn3	0.5	2	7100	0
MosOpn3	0.5	2	7200	0
MosOpn3	0.5	2	7300	0
MosOpn3	0.5	2	7400	0
MosOpn3	0.5	2	7500	0
MosOpn3	0.5	2	7600	0
MosOpn3	0.5	2	7700	0
MosOpn3	0.5	2	7800	0
MosOpn3	0.5	2	7900	0
MosOpn3	0.5	2	8000	0
MosOpn3	0.5	2	8100	0
MosOpn3	0.5	2	8200	0
MosOpn3	0.5	2	8300	0
MosOpn3	0.5	2	8400	0
MosOpn3	0.5	2	8500	0
MosOpn3	0.5	2	8600	0
MosOpn3	0.5	2	8700	0.238095
MosOpn3	0.5	2	8800	0.238095
MosOpn3	0.5	2	8900	0.238095
MosOpn3	0.5	2	9000	0.238095
MosOpn3	0.5	2	9100	0.238095
MosOpn3	0.5	2	9200	0.238095
MosOpn3	0.5	2	9300	0.238095
MosOpn3	0.5	2	9400	0.238095
MosOpn3	0.5	2	9500	0.238095
MosOpn3	0.5	2	9600	0.238095
MosOpn3	0.5	2	9700	0
MosOpn3	0.5	2	9800	0
MosOpn3	0.5	2	9900	0
MosOpn3	0.5	2	10000	0
MosOpn3	0.5	2	10100	0
MosOpn3	0.5	2	10200	0
MosOpn3	0.5	2	10300	0
MosOpn3	0.5	2	10400	0
MosOpn3	0.5	2	10500	0
MosOpn3	0.5	2	10600	0
MosOpn3	0.5	2	10700	0
MosOpn3	0.5	2	10800	0
MosOpn3	0.5	2	10900	0
MosOpn3	0.5	2	11000	0
MosOpn3	0.5	2	11100	0
MosOpn3	0.5	2	11200	0
MosOpn3	0.5	2	11300	0
MosOpn3	0.5	2	11400	0
MosOpn3	0.5	2	11500	0
MosOpn3	0.5	2	11600	0.238095
MosOpn3	0.5	2	11700	0.238095
MosOpn3	0.5	2	11800	0.238095
MosOpn3	0.5	2	11900	0.238095
MosOpn3	0.5	2	12000	0.238095
MosOpn3	0.5	2	12100	0.238095
MosOpn3	0.5	2	12200	0.238095
MosOpn3	0.5	2	12300	0.238095
MosOpn3	0.5	2	12400	0.238095
MosOpn3	0.5	2	12500	0.238095
MosOpn3	0.5	2	12600	0
MosOpn3	0.5	2	12700	0
MosOpn3	0.5	2	12800	0
MosOpn3	0.5	2	12900	0
MosOpn3	0.5	2	13000	0
MosOpn3	0.5	2	13100	0
MosOpn3	0.5	2	13200	0
MosOpn3	0.5	2	13300	0
MosOpn3	0.5	2	13400	0
MosOpn3	0.5	2	13500	0
MosOpn3	0.5	2	13600	0
MosOpn3	0.5	2	13700	0
MosOpn3	0.5	2	13800	0
MosOpn3	0.5	2	13900	0
MosOpn3	0.5	2	14000	0
MosOpn3	0.5	2	14100	0
MosOpn3	0.5	2	14200	0
MosOpn3	0.5	2	14300	0
MosOpn3	0.5	2	14400	0
MosOpn3	0.5	2	14500	0
MosOpn3	0.5	2	14600	0.238095
MosOpn3	0.5	2	14700	0.238095
MosOpn3	0.5	2	14800	0.238095
MosOpn3	0.5	2	14900	0.238095
MosOpn3	0.5	2	15000	0.238095
MosOpn3	0.5	2	15100	0.238095
MosOpn3	0.5	2	15200	0.238095
MosOpn3	0.5	2	15300	0.238095
MosOpn3	0.5	2	15400	0.238095
MosOpn3	0.5	2	15500	0.47619
MosOpn3	0.5	2	15600	0.238095
MosOpn3	0.5	2	15700	0.238095
MosOpn3	0.5	2	15800	0.238095
MosOpn3	0.5	2	15900	0.238095
MosOpn3	0.5	2	16000	0.238095
MosOpn3	0.5	2	16100	0.47619
MosOpn3	0.5	2	16200	0.47619
MosOpn3	0.5	2	16300	0.47619
MosOpn3	0.5	2	16400	0.47619
MosOpn3	0.5	2	16500	0.238095
MosOpn3	0.5	2	16600	0.238095
MosOpn3	0.5	2	16700	0.47619
MosOpn3	0.5	2	16800	0.47619
MosOpn3	0.5	2	16900	0.47619
MosOpn3	0.5	2	17000	0.47619
MosOpn3	0.5	2	17100	0.238095
MosOpn3	0.5	2	17200	0.238095
MosOpn3	0.5	2	17300	0.47619
MosOpn3	0.5	2	17400	0.47619
MosOpn3	0.5	2	17500	0.47619
MosOpn3	0.5	2	17600	0.714286
MosOpn3	0.5	2	17700	0.47619
MosOpn3	0.5	2	17800	0.47619
MosOpn3	0.5	2	17900	0.47619
MosOpn3	0.5	2	18000	0.47619
MosOpn3	0.5	2	18100	0.47619
MosOpn3	0.5	2	18200	0.47619
MosOpn3	0.5	2	18300	0.238095
MosOpn3	0.5	2	18400	0.238095
MosOpn3	0.5	2	18500	0.238095
MosOpn3	0.5	2	18600	0.238095
MosOpn3	0.5	2	18700	0.238095
MosOpn3	0.5	2	18800	0.238095
MosOpn3	0.5	2	18900	0.238095
MosOpn3	0.5	2	19000	0.238095
MosOpn3	0.5	2	19100	0.238095
MosOpn3	0.5	2	19200	0.47619
MosOpn3	0.5	2	19300	0.47619
MosOpn3	0.5	2	19400	0.47619
MosOpn3	0.5	2	19500	0.47619
MosOpn3	0.5	2	19600	0.238095
MosOpn3	0.5	2	19700	0.238095
MosOpn3	0.5	2	19800	0.238095
MosOpn3	0.5	2	19900	0.238095
MosOpn3	0.5	2	20000	0.238095
MosOpn3	0.5	2	20100	0.238095
MosOpn3	0.5	2	20200	0
MosOpn3	0.5	2	20300	0
MosOpn3	0.5	2	20400	0.238095
MosOpn3	0.5	2	20500	0.238095
MosOpn3	0.5	2	20600	0.238095
MosOpn3	0.5	2	20700	0.238095
MosOpn3	0.5	2	20800	0.47619
MosOpn3	0.5	2	20900	0.47619
MosOpn3	0.5	2	21000	0.47619
MosOpn3	0.5	2	21100	0.47619
MosOpn3	0.5	2	21200	0.47619
MosOpn3	0.5	2	21300	0.47619
MosOpn3	0.5	2	21400	0.238095
MosOpn3	0.5	2	21500	0.238095
MosOpn3	0.5	2	21600	0.238095
MosOpn3	0.5	2	21700	0.238095
MosOpn3	0.5	2	21800	0
MosOpn3	0.5	2	21900	0.238095
MosOpn3	0.5	2	22000	0.238095
MosOpn3	0.5	2	22100	0.238095
MosOpn3	0.5	2	22200	0.238095
MosOpn3	0.5	2	22300	0.238095
MosOpn3	0.5	2	22400	0.238095
MosOpn3	0.5	2	22500	0.238095
MosOpn3	0.5	2	22600	0.47619
MosOpn3	0.5	2	22700	0.47619
MosOpn3	0.5	2	22800	0.47619
MosOpn3	0.5	2	22900	0.238095
MosOpn3	0.5	2	23000	0.238095
MosOpn3	0.5	2	23100	0.238095
MosOpn3	0.5	2	23200	0.238095
MosOpn3	0.5	2	23300	0.47619
MosOpn3	0.5	2	23400	0.47619
MosOpn3	0.5	2	23500	0.47619
MosOpn3	0.5	2	23600	0.238095
MosOpn3	0.5	2	23700	0.238095
MosOpn3	0.5	2	23800	0.238095
MosOpn3	0.5	2	23900	0.238095
MosOpn3	0.5	2	24000	0.238095
MosOpn3	0.5	2	24100	0.47619
MosOpn3	0.5	2	24200	0.47619
MosOpn3	0.5	2	24300	0.238095
MosOpn3	0.5	2	24400	0.238095
MosOpn3	0.5	2	24500	0.238095
MosOpn3	0.5	2	24600	0.238095
MosOpn3	0.5	2	24700	0.238095
MosOpn3	0.5	2	24800	0.238095
MosOpn3	0.5	2	24900	0.238095
MosOpn3	0.5	2	25000	0.238095
MosOpn3	0.5	2	25100	0.238095
MosOpn3	0.5	2	25200	0.238095
MosOpn3	0.5	2	25300	0.238095
MosOpn3	0.5	2	25400	0.238095
MosOpn3	0.5	2	25500	0.238095
MosOpn3	0.5	2	25600	0.238095
MosOpn3	0.5	2	25700	0.238095
MosOpn3	0.5	2	25800	0.238095
MosOpn3	0.5	2	25900	0.238095
MosOpn3	0.5	2	26000	0.238095
MosOpn3	0.5	2	26100	0.238095
MosOpn3	0.5	2	26200	0.238095
MosOpn3	0.5	2	26300	0.238095
MosOpn3	0.5	2	26400	0.238095
MosOpn3	0.5	2	26500	0.238095
MosOpn3	0.5	2	26600	0.238095
MosOpn3	0.5	2	26700	0.238095
MosOpn3	0.5	2	26800	0.47619
MosOpn3	0.5	2	26900	0.47619
MosOpn3	0.5	2	27000	0.47619
MosOpn3	0.5	2	27100	0.238095
MosOpn3	0.5	2	27200	0.238095
MosOpn3	0.5	2	27300	0.238095
MosOpn3	0.5	2	27400	0.238095
MosOpn3	0.5	2	27500	0.238095
MosOpn3	0.5	2	27600	0.238095
MosOpn3	0.5	2	27700	0.47619
MosOpn3	0.5	2	27800	0.238095
MosOpn3	0.5	2	27900	0.238095
MosOpn3	0.5	2	28000	0.238095
MosOpn3	0.5	2	28100	0.238095
MosOpn3	0.5	2	28200	0.238095
MosOpn3	0.5	2	28300	0.238095
MosOpn3	0.5	2	28400	0.238095
MosOpn3	0.5	2	28500	0.238095
MosOpn3	0.5	2	28600	0.238095
MosOpn3	0.5	2	28700	0.238095
MosOpn3	0.5	2	28800	0.238095
MosOpn3	0.5	2	28900	0.238095
MosOpn3	0.5	2	29000	0.238095
MosOpn3	0.5	2	29100	0.238095
MosOpn3	0.5	2	29200	0.238095
MosOpn3	0.5	2	29300	0.47619
MosOpn3	0.5	2	29400	0.47619
MosOpn3	0.5	2	29500	0.47619
MosOpn3	0.5	2	29600	0.47619
MosOpn3	0.5	2	29700	0.238095
MosOpn3	0.5	2	29800	0.238095
MosOpn3	0.5	2	29900	0.47619
MosOpn3	0.5	2	30000	0.47619
MosOpn3	0.5	2	30100	0.47619
MosOpn3	0.5	2	30200	0.47619
MosOpn3	0.5	2	30300	0.238095
MosOpn3	0.5	2	30400	0.238095
MosOpn3	0.5	2	30500	0.238095
MosOpn3	0.5	2	30600	0.47619
MosOpn3	0.5	2	30700	0.47619
MosOpn3	0.5	2	30800	0.47619
MosOpn3	0.5	2	30900	0.238095
MosOpn3	0.5	2	31000	0.238095
MosOpn3	0.5	2	31100	0.238095
MosOpn3	0.5	2	31200	0.47619
MosOpn3	0.5	2	31300	0.47619
MosOpn3	0.5	2	31400	0.47619
MosOpn3	0.5	2	31500	0.47619
MosOpn3	0.5	2	31600	0.238095
MosOpn3	0.5	2	31700	0.238095
MosOpn3	0.5	2	31800	0.238095
MosOpn3	0.5	2	31900	0.238095
MosOpn3	0.5	2	32000	0.238095
MosOpn3	0.5	2	32100	0.47619
MosOpn3	0.5	2	32200	0.238095
MosOpn3	0.5	2	32300	0.238095
MosOpn3	0.5	2	32400	0.238095
MosOpn3	0.5	2	32500	0.238095
MosOpn3	0.5	2	32600	0.238095
MosOpn3	0.5	2	32700	0.47619
MosOpn3	0.5	2	32800	0.47619
MosOpn3	0.5	2	32900	0.47619
MosOpn3	0.5	2	33000	0.47619
MosOpn3	0.5	2	33100	0.238095
MosOpn3	0.5	2	33200	0.238095
MosOpn3	0.5	2	33300	0.238095
MosOpn3	0.5	2	33400	0.47619
MosOpn3	0.5	2	33500	0.47619
MosOpn3	0.5	2	33600	0.47619
MosOpn3	0.5	2	33700	0.238095
MosOpn3	0.5	2	33800	0.238095
MosOpn3	0.5	2	33900	0.47619
MosOpn3	0.5	2	34000	0.47619
MosOpn3	0.5	2	34100	0.47619
MosOpn3	0.5	2	34200	0.47619
MosOpn3	0.5	2	34300	0.47619
MosOpn3	0.5	2	34400	0.238095
MosOpn3	0.5	2	34500	0.238095
MosOpn3	0.5	3	-9500	0.769231
MosOpn3	0.5	3	-9400	0.512821
MosOpn3	0.5	3	-9300	0.769231
MosOpn3	0.5	3	-9200	0.769231
MosOpn3	0.5	3	-9100	0.769231
MosOpn3	0.5	3	-9000	0.769231
MosOpn3	0.5	3	-8900	0.769231
MosOpn3	0.5	3	-8800	1.02564
MosOpn3	0.5	3	-8700	1.02564
MosOpn3	0.5	3	-8600	1.02564
MosOpn3	0.5	3	-8500	1.02564
MosOpn3	0.5	3	-8400	1.02564
MosOpn3	0.5	3	-8300	1.02564
MosOpn3	0.5	3	-8200	1.02564
MosOpn3	0.5	3	-8100	1.02564
MosOpn3	0.5	3	-8000	1.02564
MosOpn3	0.5	3	-7900	1.02564
MosOpn3	0.5	3	-7800	1.02564
MosOpn3	0.5	3	-7700	1.02564
MosOpn3	0.5	3	-7600	1.02564
MosOpn3	0.5	3	-7500	1.02564
MosOpn3	0.5	3	-7400	1.02564
MosOpn3	0.5	3	-7300	1.02564
MosOpn3	0.5	3	-7200	1.02564
MosOpn3	0.5	3	-7100	1.02564
MosOpn3	0.5	3	-7000	1.02564
MosOpn3	0.5	3	-6900	1.02564
MosOpn3	0.5	3	-6800	1.02564
MosOpn3	0.5	3	-6700	1.02564
MosOpn3	0.5	3	-6600	1.02564
MosOpn3	0.5	3	-6500	1.02564
MosOpn3	0.5	3	-6400	1.02564
MosOpn3	0.5	3	-6300	1.02564
MosOpn3	0.5	3	-6200	1.02564
MosOpn3	0.5	3	-6100	1.02564
MosOpn3	0.5	3	-6000	1.02564
MosOpn3	0.5	3	-5900	1.02564
MosOpn3	0.5	3	-5800	1.02564
MosOpn3	0.5	3	-5700	1.02564
MosOpn3	0.5	3	-5600	0.769231
MosOpn3	0.5	3	-5500	1.02564
MosOpn3	0.5	3	-5400	1.02564
MosOpn3	0.5	3	-5300	1.02564
MosOpn3	0.5	3	-5200	1.02564
MosOpn3	0.5	3	-5100	0.769231
MosOpn3	0.5	3	-5000	1.02564
MosOpn3	0.5	3	-4900	1.02564
MosOpn3	0.5	3	-4800	1.02564
MosOpn3	0.5	3	-4700	1.02564
MosOpn3	0.5	3	-4600	1.02564
MosOpn3	0.5	3	-4500	1.02564
MosOpn3	0.5	3	-4400	1.02564
MosOpn3	0.5	3	-4300	1.02564
MosOpn3	0.5	3	-4200	1.02564
MosOpn3	0.5	3	-4100	1.02564
MosOpn3	0.5	3	-4000	1.02564
MosOpn3	0.5	3	-3900	1.02564
MosOpn3	0.5	3	-3800	1.02564
MosOpn3	0.5	3	-3700	1.02564
MosOpn3	0.5	3	-3600	1.02564
MosOpn3	0.5	3	-3500	1.02564
MosOpn3	0.5	3	-3400	1.02564
MosOpn3	0.5	3	-3300	1.02564
MosOpn3	0.5	3	-3200	1.02564
MosOpn3	0.5	3	-3100	1.02564
MosOpn3	0.5	3	-3000	1.02564
MosOpn3	0.5	3	-2900	1.02564
MosOpn3	0.5	3	-2800	1.02564
MosOpn3	0.5	3	-2700	1.02564
MosOpn3	0.5	3	-2600	1.02564
MosOpn3	0.5	3	-2500	1.02564
MosOpn3	0.5	3	-2400	1.02564
MosOpn3	0.5	3	-2300	1.02564
MosOpn3	0.5	3	-2200	1.02564
MosOpn3	0.5	3	-2100	1.02564
MosOpn3	0.5	3	-2000	1.02564
MosOpn3	0.5	3	-1900	1.02564
MosOpn3	0.5	3	-1800	1.02564
MosOpn3	0.5	3	-1700	1.02564
MosOpn3	0.5	3	-1600	1.02564
MosOpn3	0.5	3	-1500	1.02564
MosOpn3	0.5	3	-1400	1.02564
MosOpn3	0.5	3	-1300	1.02564
MosOpn3	0.5	3	-1200	1.02564
MosOpn3	0.5	3	-1100	1.02564
MosOpn3	0.5	3	-1000	1.02564
MosOpn3	0.5	3	-900	1.02564
MosOpn3	0.5	3	-800	1.02564
MosOpn3	0.5	3	-700	1.02564
MosOpn3	0.5	3	-600	1.02564
MosOpn3	0.5	3	-500	1.02564
MosOpn3	0.5	3	-400	1.02564
MosOpn3	0.5	3	-300	1.02564
MosOpn3	0.5	3	-200	1.02564
MosOpn3	0.5	3	-100	1.02564
MosOpn3	0.5	3	0	0.769231
MosOpn3	0.5	3	100	1.02564
MosOpn3	0.5	3	200	0.769231
MosOpn3	0.5	3	300	0.769231
MosOpn3	0.5	3	400	1.02564
MosOpn3	0.5	3	500	0.769231
MosOpn3	0.5	3	600	0.769231
MosOpn3	0.5	3	700	0.512821
MosOpn3	0.5	3	800	0.512821
MosOpn3	0.5	3	900	0.512821
MosOpn3	0.5	3	1000	0.512821
MosOpn3	0.5	3	1100	0.25641
MosOpn3	0.5	3	1200	0.25641
MosOpn3	0.5	3	1300	0.25641
MosOpn3	0.5	3	1400	0
MosOpn3	0.5	3	1500	0
MosOpn3	0.5	3	1600	0
MosOpn3	0.5	3	1700	0
MosOpn3	0.5	3	1800	0
MosOpn3	0.5	3	1900	0
MosOpn3	0.5	3	2000	0
MosOpn3	0.5	3	2100	0
MosOpn3	0.5	3	2200	0
MosOpn3	0.5	3	2300	0
MosOpn3	0.5	3	2400	0
MosOpn3	0.5	3	2500	0
MosOpn3	0.5	3	2600	0
MosOpn3	0.5	3	2700	0
MosOpn3	0.5	3	2800	0
MosOpn3	0.5	3	2900	0
MosOpn3	0.5	3	3000	0
MosOpn3	0.5	3	3100	0
MosOpn3	0.5	3	3200	0
MosOpn3	0.5	3	3300	0
MosOpn3	0.5	3	3400	0
MosOpn3	0.5	3	3500	0
MosOpn3	0.5	3	3600	0
MosOpn3	0.5	3	3700	0
MosOpn3	0.5	3	3800	0
MosOpn3	0.5	3	3900	0
MosOpn3	0.5	3	4000	0
MosOpn3	0.5	3	4100	0
MosOpn3	0.5	3	4200	0
MosOpn3	0.5	3	4300	0
MosOpn3	0.5	3	4400	0
MosOpn3	0.5	3	4500	0
MosOpn3	0.5	3	4600	0
MosOpn3	0.5	3	4700	0
MosOpn3	0.5	3	4800	0
MosOpn3	0.5	3	4900	0.25641
MosOpn3	0.5	3	5000	0.25641
MosOpn3	0.5	3	5100	0.25641
MosOpn3	0.5	3	5200	0.25641
MosOpn3	0.5	3	5300	0.25641
MosOpn3	0.5	3	5400	0.25641
MosOpn3	0.5	3	5500	0.25641
MosOpn3	0.5	3	5600	0.25641
MosOpn3	0.5	3	5700	0.25641
MosOpn3	0.5	3	5800	0.25641
MosOpn3	0.5	3	5900	0
MosOpn3	0.5	3	6000	0
MosOpn3	0.5	3	6100	0
MosOpn3	0.5	3	6200	0
MosOpn3	0.5	3	6300	0
MosOpn3	0.5	3	6400	0
MosOpn3	0.5	3	6500	0
MosOpn3	0.5	3	6600	0
MosOpn3	0.5	3	6700	0
MosOpn3	0.5	3	6800	0
MosOpn3	0.5	3	6900	0
MosOpn3	0.5	3	7000	0
MosOpn3	0.5	3	7100	0
MosOpn3	0.5	3	7200	0
MosOpn3	0.5	3	7300	0
MosOpn3	0.5	3	7400	0
MosOpn3	0.5	3	7500	0.25641
MosOpn3	0.5	3	7600	0.25641
MosOpn3	0.5	3	7700	0.25641
MosOpn3	0.5	3	7800	0.25641
MosOpn3	0.5	3	7900	0.25641
MosOpn3	0.5	3	8000	0.25641
MosOpn3	0.5	3	8100	0.25641
MosOpn3	0.5	3	8200	0.25641
MosOpn3	0.5	3	8300	0.25641
MosOpn3	0.5	3	8400	0.25641
MosOpn3	0.5	3	8500	0
MosOpn3	0.5	3	8600	0
MosOpn3	0.5	3	8700	0
MosOpn3	0.5	3	8800	0
MosOpn3	0.5	3	8900	0
MosOpn3	0.5	3	9000	0
MosOpn3	0.5	3	9100	0
MosOpn3	0.5	3	9200	0
MosOpn3	0.5	3	9300	0
MosOpn3	0.5	3	9400	0.25641
MosOpn3	0.5	3	9500	0.25641
MosOpn3	0.5	3	9600	0.25641
MosOpn3	0.5	3	9700	0.25641
MosOpn3	0.5	3	9800	0.25641
MosOpn3	0.5	3	9900	0.25641
MosOpn3	0.5	3	10000	0.25641
MosOpn3	0.5	3	10100	0.25641
MosOpn3	0.5	3	10200	0.25641
MosOpn3	0.5	3	10300	0.25641
MosOpn3	0.5	3	10400	0
MosOpn3	0.5	3	10500	0
MosOpn3	0.5	3	10600	0
MosOpn3	0.5	3	10700	0
MosOpn3	0.5	3	10800	0
MosOpn3	0.5	3	10900	0
MosOpn3	0.5	3	11000	0
MosOpn3	0.5	3	11100	0.25641
MosOpn3	0.5	3	11200	0.25641
MosOpn3	0.5	3	11300	0.25641
MosOpn3	0.5	3	11400	0.25641
MosOpn3	0.5	3	11500	0.25641
MosOpn3	0.5	3	11600	0.25641
MosOpn3	0.5	3	11700	0.25641
MosOpn3	0.5	3	11800	0.25641
MosOpn3	0.5	3	11900	0.25641
MosOpn3	0.5	3	12000	0.25641
MosOpn3	0.5	3	12100	0
MosOpn3	0.5	3	12200	0
MosOpn3	0.5	3	12300	0
MosOpn3	0.5	3	12400	0.25641
MosOpn3	0.5	3	12500	0.25641
MosOpn3	0.5	3	12600	0.25641
MosOpn3	0.5	3	12700	0.25641
MosOpn3	0.5	3	12800	0.25641
MosOpn3	0.5	3	12900	0.25641
MosOpn3	0.5	3	13000	0.25641
MosOpn3	0.5	3	13100	0.25641
MosOpn3	0.5	3	13200	0.25641
MosOpn3	0.5	3	13300	0.25641
MosOpn3	0.5	3	13400	0
MosOpn3	0.5	3	13500	0
MosOpn3	0.5	3	13600	0
MosOpn3	0.5	3	13700	0.25641
MosOpn3	0.5	3	13800	0.25641
MosOpn3	0.5	3	13900	0.25641
MosOpn3	0.5	3	14000	0.25641
MosOpn3	0.5	3	14100	0.25641
MosOpn3	0.5	3	14200	0.25641
MosOpn3	0.5	3	14300	0.25641
MosOpn3	0.5	3	14400	0.25641
MosOpn3	0.5	3	14500	0.25641
MosOpn3	0.5	3	14600	0.25641
MosOpn3	0.5	3	14700	0
MosOpn3	0.5	3	14800	0
MosOpn3	0.5	3	14900	0.25641
MosOpn3	0.5	3	15000	0.25641
MosOpn3	0.5	3	15100	0.25641
MosOpn3	0.5	3	15200	0.25641
MosOpn3	0.5	3	15300	0.25641
MosOpn3	0.5	3	15400	0.25641
MosOpn3	0.5	3	15500	0.25641
MosOpn3	0.5	3	15600	0.25641
MosOpn3	0.5	3	15700	0.25641
MosOpn3	0.5	3	15800	0.25641
MosOpn3	0.5	3	15900	0.25641
MosOpn3	0.5	3	16000	0.25641
MosOpn3	0.5	3	16100	0.25641
MosOpn3	0.5	3	16200	0.25641
MosOpn3	0.5	3	16300	0.25641
MosOpn3	0.5	3	16400	0.25641
MosOpn3	0.5	3	16500	0.25641
MosOpn3	0.5	3	16600	0.25641
MosOpn3	0.5	3	16700	0.25641
MosOpn3	0.5	3	16800	0.25641
MosOpn3	0.5	3	16900	0
MosOpn3	0.5	3	17000	0.25641
MosOpn3	0.5	3	17100	0.25641
MosOpn3	0.5	3	17200	0.25641
MosOpn3	0.5	3	17300	0.512821
MosOpn3	0.5	3	17400	0.512821
MosOpn3	0.5	3	17500	0.512821
MosOpn3	0.5	3	17600	0.512821
MosOpn3	0.5	3	17700	0.769231
MosOpn3	0.5	3	17800	0.769231
MosOpn3	0.5	3	17900	1.02564
MosOpn3	0.5	3	18000	0.769231
MosOpn3	0.5	3	18100	0.769231
MosOpn3	0.5	3	18200	0.769231
MosOpn3	0.5	3	18300	0.512821
MosOpn3	0.5	3	18400	0.512821
MosOpn3	0.5	3	18500	0.512821
MosOpn3	0.5	3	18600	0.769231
MosOpn3	0.5	3	18700	0.512821
MosOpn3	0.5	3	18800	0.512821
MosOpn3	0.5	3	18900	0.25641
MosOpn3	0.5	3	19000	0.25641
MosOpn3	0.5	3	19100	0.25641
MosOpn3	0.5	3	19200	0.25641
MosOpn3	0.5	3	19300	0.25641
MosOpn3	0.5	3	19400	0.25641
MosOpn3	0.5	3	19500	0.25641
MosOpn3	0.5	3	19600	0
MosOpn3	0.5	3	19700	0
MosOpn3	0.5	3	19800	0.25641
MosOpn3	0.5	3	19900	0.25641
MosOpn3	0.5	3	20000	0.25641
MosOpn3	0.5	3	20100	0.25641
MosOpn3	0.5	3	20200	0.25641
MosOpn3	0.5	3	20300	0.25641
MosOpn3	0.5	3	20400	0.25641
MosOpn3	0.5	3	20500	0.25641
MosOpn3	0.5	3	20600	0.25641
MosOpn3	0.5	3	20700	0.512821
MosOpn3	0.5	3	20800	0.25641
MosOpn3	0.5	3	20900	0.25641
MosOpn3	0.5	3	21000	0.25641
MosOpn3	0.5	3	21100	0.25641
MosOpn3	0.5	3	21200	0.25641
MosOpn3	0.5	3	21300	0.25641
MosOpn3	0.5	3	21400	0.25641
MosOpn3	0.5	3	21500	0.512821
MosOpn3	0.5	3	21600	0.512821
MosOpn3	0.5	3	21700	0.25641
MosOpn3	0.5	3	21800	0.25641
MosOpn3	0.5	3	21900	0.25641
MosOpn3	0.5	3	22000	0.25641
MosOpn3	0.5	3	22100	0.25641
MosOpn3	0.5	3	22200	0.25641
MosOpn3	0.5	3	22300	0.512821
MosOpn3	0.5	3	22400	0.512821
MosOpn3	0.5	3	22500	0.25641
MosOpn3	0.5	3	22600	0.25641
MosOpn3	0.5	3	22700	0.25641
MosOpn3	0.5	3	22800	0.25641
MosOpn3	0.5	3	22900	0.25641
MosOpn3	0.5	3	23000	0.25641
MosOpn3	0.5	3	23100	0.512821
MosOpn3	0.5	3	23200	0.512821
MosOpn3	0.5	3	23300	0.25641
MosOpn3	0.5	3	23400	0.25641
MosOpn3	0.5	3	23500	0.25641
MosOpn3	0.5	3	23600	0.25641
MosOpn3	0.5	3	23700	0.25641
MosOpn3	0.5	3	23800	0.25641
MosOpn3	0.5	3	23900	0.25641
MosOpn3	0.5	3	24000	0.512821
MosOpn3	0.5	3	24100	0.25641
MosOpn3	0.5	3	24200	0.25641
MosOpn3	0.5	3	24300	0.25641
MosOpn3	0.5	3	24400	0.25641
MosOpn3	0.5	3	24500	0.25641
MosOpn3	0.5	3	24600	0.25641
MosOpn3	0.5	3	24700	0.25641
MosOpn3	0.5	3	24800	0.512821
MosOpn3	0.5	3	24900	0.512821
MosOpn3	0.5	3	25000	0.25641
MosOpn3	0.5	3	25100	0.25641
MosOpn3	0.5	3	25200	0.25641
MosOpn3	0.5	3	25300	0.25641
MosOpn3	0.5	3	25400	0.25641
MosOpn3	0.5	3	25500	0.512821
MosOpn3	0.5	3	25600	0.512821
MosOpn3	0.5	3	25700	0.512821
MosOpn3	0.5	3	25800	0.25641
MosOpn3	0.5	3	25900	0.25641
MosOpn3	0.5	3	26000	0.25641
MosOpn3	0.5	3	26100	0.25641
MosOpn3	0.5	3	26200	0.25641
MosOpn3	0.5	3	26300	0.512821
MosOpn3	0.5	3	26400	0.512821
MosOpn3	0.5	3	26500	0.25641
MosOpn3	0.5	3	26600	0.25641
MosOpn3	0.5	3	26700	0.25641
MosOpn3	0.5	3	26800	0.25641
MosOpn3	0.5	3	26900	0.25641
MosOpn3	0.5	3	27000	0.25641
MosOpn3	0.5	3	27100	0.512821
MosOpn3	0.5	3	27200	0.512821
MosOpn3	0.5	3	27300	0.25641
MosOpn3	0.5	3	27400	0.25641
MosOpn3	0.5	3	27500	0.25641
MosOpn3	0.5	3	27600	0.25641
MosOpn3	0.5	3	27700	0.25641
MosOpn3	0.5	3	27800	0.512821
MosOpn3	0.5	3	27900	0.512821
MosOpn3	0.5	3	28000	0.512821
MosOpn3	0.5	3	28100	0.25641
MosOpn3	0.5	3	28200	0.25641
MosOpn3	0.5	3	28300	0.25641
MosOpn3	0.5	3	28400	0.25641
MosOpn3	0.5	3	28500	0.25641
MosOpn3	0.5	3	28600	0.512821
MosOpn3	0.5	3	28700	0.512821
MosOpn3	0.5	3	28800	0.25641
MosOpn3	0.5	3	28900	0.25641
MosOpn3	0.5	3	29000	0.25641
MosOpn3	0.5	3	29100	0.25641
MosOpn3	0.5	3	29200	0.25641
MosOpn3	0.5	3	29300	0.512821
MosOpn3	0.5	3	29400	0.512821
MosOpn3	0.5	3	29500	0.512821
MosOpn3	0.5	3	29600	0.25641
MosOpn3	0.5	3	29700	0.25641
MosOpn3	0.5	3	29800	0.25641
MosOpn3	0.5	3	29900	0.25641
MosOpn3	0.5	3	30000	0.512821
MosOpn3	0.5	3	30100	0.512821
MosOpn3	0.5	3	30200	0.512821
MosOpn3	0.5	3	30300	0.25641
MosOpn3	0.5	3	30400	0.25641
MosOpn3	0.5	3	30500	0.25641
MosOpn3	0.5	3	30600	0.25641
MosOpn3	0.5	3	30700	0.512821
MosOpn3	0.5	3	30800	0.512821
MosOpn3	0.5	3	30900	0.512821
MosOpn3	0.5	3	31000	0.25641
MosOpn3	0.5	3	31100	0.25641
MosOpn3	0.5	3	31200	0.25641
MosOpn3	0.5	3	31300	0.25641
MosOpn3	0.5	3	31400	0.25641
MosOpn3	0.5	3	31500	0.512821
MosOpn3	0.5	3	31600	0.512821
MosOpn3	0.5	3	31700	0.25641
MosOpn3	0.5	3	31800	0.25641
MosOpn3	0.5	3	31900	0.25641
MosOpn3	0.5	3	32000	0.25641
MosOpn3	0.5	3	32100	0.25641
MosOpn3	0.5	3	32200	0.512821
MosOpn3	0.5	3	32300	0.512821
MosOpn3	0.5	3	32400	0.512821
MosOpn3	0.5	3	32500	0.25641
MosOpn3	0.5	3	32600	0.25641
MosOpn3	0.5	3	32700	0.25641
MosOpn3	0.5	3	32800	0.25641
MosOpn3	0.5	3	32900	0.512821
MosOpn3	0.5	3	33000	0.512821
MosOpn3	0.5	3	33100	0.512821
MosOpn3	0.5	3	33200	0.25641
MosOpn3	0.5	3	33300	0.25641
MosOpn3	0.5	3	33400	0.25641
MosOpn3	0.5	3	33500	0.25641
MosOpn3	0.5	3	33600	0.512821
MosOpn3	0.5	3	33700	0.512821
MosOpn3	0.5	3	33800	0.512821
MosOpn3	0.5	3	33900	0.25641
MosOpn3	0.5	3	34000	0.25641
MosOpn3	0.5	3	34100	0.25641
MosOpn3	0.5	3	34200	0.25641
MosOpn3	0.5	3	34300	0.25641
MosOpn3	0.5	3	34400	0.25641
MosOpn3	0.5	3	34500	0.512821
MosOpn3	0.5	3	-9500	0.97561
MosOpn3	0.5	3	-9400	0.731707
MosOpn3	0.5	3	-9300	0.731707
MosOpn3	0.5	3	-9200	0.97561
MosOpn3	0.5	3	-9100	0.97561
MosOpn3	0.5	3	-9000	1.21951
MosOpn3	0.5	3	-8900	0.97561
MosOpn3	0.5	3	-8800	1.21951
MosOpn3	0.5	3	-8700	0.97561
MosOpn3	0.5	3	-8600	0.97561
MosOpn3	0.5	3	-8500	0.97561
MosOpn3	0.5	3	-8400	0.97561
MosOpn3	0.5	3	-8300	1.21951
MosOpn3	0.5	3	-8200	0.97561
MosOpn3	0.5	3	-8100	0.97561
MosOpn3	0.5	3	-8000	0.97561
MosOpn3	0.5	3	-7900	0.97561
MosOpn3	0.5	3	-7800	0.97561
MosOpn3	0.5	3	-7700	0.97561
MosOpn3	0.5	3	-7600	0.97561
MosOpn3	0.5	3	-7500	0.97561
MosOpn3	0.5	3	-7400	0.97561
MosOpn3	0.5	3	-7300	0.97561
MosOpn3	0.5	3	-7200	0.97561
MosOpn3	0.5	3	-7100	1.21951
MosOpn3	0.5	3	-7000	0.97561
MosOpn3	0.5	3	-6900	0.97561
MosOpn3	0.5	3	-6800	0.97561
MosOpn3	0.5	3	-6700	0.97561
MosOpn3	0.5	3	-6600	1.21951
MosOpn3	0.5	3	-6500	0.97561
MosOpn3	0.5	3	-6400	0.97561
MosOpn3	0.5	3	-6300	0.97561
MosOpn3	0.5	3	-6200	0.97561
MosOpn3	0.5	3	-6100	0.97561
MosOpn3	0.5	3	-6000	0.97561
MosOpn3	0.5	3	-5900	0.97561
MosOpn3	0.5	3	-5800	0.97561
MosOpn3	0.5	3	-5700	0.97561
MosOpn3	0.5	3	-5600	0.97561
MosOpn3	0.5	3	-5500	0.97561
MosOpn3	0.5	3	-5400	1.21951
MosOpn3	0.5	3	-5300	0.97561
MosOpn3	0.5	3	-5200	0.97561
MosOpn3	0.5	3	-5100	0.97561
MosOpn3	0.5	3	-5000	0.97561
MosOpn3	0.5	3	-4900	1.21951
MosOpn3	0.5	3	-4800	0.97561
MosOpn3	0.5	3	-4700	0.97561
MosOpn3	0.5	3	-4600	0.97561
MosOpn3	0.5	3	-4500	0.97561
MosOpn3	0.5	3	-4400	0.97561
MosOpn3	0.5	3	-4300	0.97561
MosOpn3	0.5	3	-4200	1.21951
MosOpn3	0.5	3	-4100	0.97561
MosOpn3	0.5	3	-4000	0.97561
MosOpn3	0.5	3	-3900	0.97561
MosOpn3	0.5	3	-3800	0.97561
MosOpn3	0.5	3	-3700	1.21951
MosOpn3	0.5	3	-3600	0.97561
MosOpn3	0.5	3	-3500	0.97561
MosOpn3	0.5	3	-3400	0.97561
MosOpn3	0.5	3	-3300	0.97561
MosOpn3	0.5	3	-3200	0.97561
MosOpn3	0.5	3	-3100	0.97561
MosOpn3	0.5	3	-3000	0.97561
MosOpn3	0.5	3	-2900	0.97561
MosOpn3	0.5	3	-2800	0.97561
MosOpn3	0.5	3	-2700	0.97561
MosOpn3	0.5	3	-2600	0.97561
MosOpn3	0.5	3	-2500	0.97561
MosOpn3	0.5	3	-2400	0.97561
MosOpn3	0.5	3	-2300	0.97561
MosOpn3	0.5	3	-2200	0.97561
MosOpn3	0.5	3	-2100	0.97561
MosOpn3	0.5	3	-2000	0.97561
MosOpn3	0.5	3	-1900	0.97561
MosOpn3	0.5	3	-1800	0.97561
MosOpn3	0.5	3	-1700	0.97561
MosOpn3	0.5	3	-1600	0.97561
MosOpn3	0.5	3	-1500	1.21951
MosOpn3	0.5	3	-1400	0.97561
MosOpn3	0.5	3	-1300	0.97561
MosOpn3	0.5	3	-1200	0.97561
MosOpn3	0.5	3	-1100	0.97561
MosOpn3	0.5	3	-1000	1.21951
MosOpn3	0.5	3	-900	0.97561
MosOpn3	0.5	3	-800	0.97561
MosOpn3	0.5	3	-700	0.97561
MosOpn3	0.5	3	-600	0.97561
MosOpn3	0.5	3	-500	0.97561
MosOpn3	0.5	3	-400	0.97561
MosOpn3	0.5	3	-300	0.97561
MosOpn3	0.5	3	-200	0.97561
MosOpn3	0.5	3	-100	0.97561
MosOpn3	0.5	3	0	0.731707
MosOpn3	0.5	3	100	0.731707
MosOpn3	0.5	3	200	0.731707
MosOpn3	0.5	3	300	0.487805
MosOpn3	0.5	3	400	0.487805
MosOpn3	0.5	3	500	0.243902
MosOpn3	0.5	3	600	0.243902
MosOpn3	0.5	3	700	0.243902
MosOpn3	0.5	3	800	0
MosOpn3	0.5	3	900	0
MosOpn3	0.5	3	1000	0
MosOpn3	0.5	3	1100	0
MosOpn3	0.5	3	1200	0
MosOpn3	0.5	3	1300	0
MosOpn3	0.5	3	1400	0
MosOpn3	0.5	3	1500	0
MosOpn3	0.5	3	1600	0
MosOpn3	0.5	3	1700	0
MosOpn3	0.5	3	1800	0
MosOpn3	0.5	3	1900	0
MosOpn3	0.5	3	2000	0
MosOpn3	0.5	3	2100	0
MosOpn3	0.5	3	2200	0
MosOpn3	0.5	3	2300	0
MosOpn3	0.5	3	2400	0
MosOpn3	0.5	3	2500	0
MosOpn3	0.5	3	2600	0
MosOpn3	0.5	3	2700	0
MosOpn3	0.5	3	2800	0
MosOpn3	0.5	3	2900	0
MosOpn3	0.5	3	3000	0
MosOpn3	0.5	3	3100	0
MosOpn3	0.5	3	3200	0
MosOpn3	0.5	3	3300	0
MosOpn3	0.5	3	3400	0
MosOpn3	0.5	3	3500	0
MosOpn3	0.5	3	3600	0
MosOpn3	0.5	3	3700	0
MosOpn3	0.5	3	3800	0
MosOpn3	0.5	3	3900	0
MosOpn3	0.5	3	4000	0
MosOpn3	0.5	3	4100	0
MosOpn3	0.5	3	4200	0
MosOpn3	0.5	3	4300	0
MosOpn3	0.5	3	4400	0
MosOpn3	0.5	3	4500	0
MosOpn3	0.5	3	4600	0
MosOpn3	0.5	3	4700	0
MosOpn3	0.5	3	4800	0
MosOpn3	0.5	3	4900	0
MosOpn3	0.5	3	5000	0
MosOpn3	0.5	3	5100	0
MosOpn3	0.5	3	5200	0
MosOpn3	0.5	3	5300	0
MosOpn3	0.5	3	5400	0
MosOpn3	0.5	3	5500	0
MosOpn3	0.5	3	5600	0
MosOpn3	0.5	3	5700	0
MosOpn3	0.5	3	5800	0
MosOpn3	0.5	3	5900	0
MosOpn3	0.5	3	6000	0
MosOpn3	0.5	3	6100	0
MosOpn3	0.5	3	6200	0
MosOpn3	0.5	3	6300	0
MosOpn3	0.5	3	6400	0
MosOpn3	0.5	3	6500	0
MosOpn3	0.5	3	6600	0.243902
MosOpn3	0.5	3	6700	0.243902
MosOpn3	0.5	3	6800	0.243902
MosOpn3	0.5	3	6900	0.243902
MosOpn3	0.5	3	7000	0.243902
MosOpn3	0.5	3	7100	0.243902
MosOpn3	0.5	3	7200	0.243902
MosOpn3	0.5	3	7300	0.243902
MosOpn3	0.5	3	7400	0.243902
MosOpn3	0.5	3	7500	0.243902
MosOpn3	0.5	3	7600	0
MosOpn3	0.5	3	7700	0
MosOpn3	0.5	3	7800	0
MosOpn3	0.5	3	7900	0
MosOpn3	0.5	3	8000	0
MosOpn3	0.5	3	8100	0
MosOpn3	0.5	3	8200	0
MosOpn3	0.5	3	8300	0
MosOpn3	0.5	3	8400	0
MosOpn3	0.5	3	8500	0
MosOpn3	0.5	3	8600	0
MosOpn3	0.5	3	8700	0
MosOpn3	0.5	3	8800	0
MosOpn3	0.5	3	8900	0
MosOpn3	0.5	3	9000	0
MosOpn3	0.5	3	9100	0
MosOpn3	0.5	3	9200	0
MosOpn3	0.5	3	9300	0
MosOpn3	0.5	3	9400	0
MosOpn3	0.5	3	9500	0
MosOpn3	0.5	3	9600	0
MosOpn3	0.5	3	9700	0
MosOpn3	0.5	3	9800	0.243902
MosOpn3	0.5	3	9900	0.243902
MosOpn3	0.5	3	10000	0.243902
MosOpn3	0.5	3	10100	0.243902
MosOpn3	0.5	3	10200	0.243902
MosOpn3	0.5	3	10300	0.243902
MosOpn3	0.5	3	10400	0.243902
MosOpn3	0.5	3	10500	0.243902
MosOpn3	0.5	3	10600	0.243902
MosOpn3	0.5	3	10700	0.243902
MosOpn3	0.5	3	10800	0
MosOpn3	0.5	3	10900	0
MosOpn3	0.5	3	11000	0
MosOpn3	0.5	3	11100	0
MosOpn3	0.5	3	11200	0
MosOpn3	0.5	3	11300	0
MosOpn3	0.5	3	11400	0
MosOpn3	0.5	3	11500	0
MosOpn3	0.5	3	11600	0
MosOpn3	0.5	3	11700	0
MosOpn3	0.5	3	11800	0
MosOpn3	0.5	3	11900	0
MosOpn3	0.5	3	12000	0.243902
MosOpn3	0.5	3	12100	0.243902
MosOpn3	0.5	3	12200	0.243902
MosOpn3	0.5	3	12300	0.243902
MosOpn3	0.5	3	12400	0.243902
MosOpn3	0.5	3	12500	0.487805
MosOpn3	0.5	3	12600	0.487805
MosOpn3	0.5	3	12700	0.487805
MosOpn3	0.5	3	12800	0.487805
MosOpn3	0.5	3	12900	0.487805
MosOpn3	0.5	3	13000	0.243902
MosOpn3	0.5	3	13100	0.243902
MosOpn3	0.5	3	13200	0.243902
MosOpn3	0.5	3	13300	0.243902
MosOpn3	0.5	3	13400	0.243902
MosOpn3	0.5	3	13500	0
MosOpn3	0.5	3	13600	0
MosOpn3	0.5	3	13700	0
MosOpn3	0.5	3	13800	0
MosOpn3	0.5	3	13900	0
[truncated: 41,923 more rows]

## Sheet: B
Line	light intensity	Sample_number	Trial_number	Latency to cardiac arrest (ms)
LamPPGi	0.4	1	1	876
LamPPGi	0.2	1	8	621
LamPPGi	0.2	1	9	861
LamPPGi	0.4	2	1	1052
LamPPGi	0.05	2	2	1250
LamPPGi	0.05	2	4	1145
LamPPGi	0.05	2	7	1100
LamPPGi	0.2	2	9	920
LamPPGi	0.2	2	10	906
LamPPGi	0.2	2	11	785
LamPPGi	0.2	2	12	935
LamPPGi	0.2	2	13	1325
LamPPGi	0.2	2	14	1310
LamPPGi	0.4	3	1	1064
LamPPGi	0.2	3	8	980
LamPPGi	0.2	3	9	905
LamPPGi	0.2	3	10	1280
LamPPGi	0.4	4	1	561
LamPPGi	0.05	4	2	486
LamPPGi	0.05	4	4	966
LamPPGi	0.05	4	5	1115
LamPPGi	0.05	4	6	2659
LamPPGi	0.05	4	7	1984
LamPPGi	0.2	4	8	711
LamPPGi	0.2	4	9	800
LamPPGi	0.2	4	10	592
LamPPGi	0.2	4	11	501
LamPPGi	0.2	4	12	844
LamPPGi	0.2	4	13	980
PufTMT	0.5	1	1	366
PufTMT	0.5	2	1	1280
PufTMT	0.5	3	1	636
PufTMT	0.05	3	2	1789
PufTMT	0.05	3	3	905
PufTMT	0.2	3	8	696
PufTMT	0.2	3	9	905
PufTMT	0.2	3	10	920
PufTMT	0.2	3	11	816
PufTMT	0.2	3	12	1040
PufTMT	0.2	3	13	995
MosOpn3	0.5	1	1	906
MosOpn3	0.05	1	2	752
MosOpn3	0.05	1	3	715
MosOpn3	0.05	1	4	725
MosOpn3	0.05	1	5	845
MosOpn3	0.05	1	6	830
MosOpn3	0.2	1	8	1220
MosOpn3	0.2	1	9	1175
MosOpn3	0.2	1	10	696
MosOpn3	0.2	1	11	966
MosOpn3	0.2	1	12	835
MosOpn3	0.2	1	13	11295
MosOpn3	0.5	2	1	726
MosOpn3	0.05	2	2	696
MosOpn3	0.05	2	3	696
MosOpn3	0.05	2	4	1640
MosOpn3	0.05	2	5	830
MosOpn3	0.05	2	6	691
MosOpn3	0.05	2	7	1175
MosOpn3	0.2	2	8	965
MosOpn3	0.2	2	9	381
MosOpn3	0.2	2	10	710
MosOpn3	0.2	2	11	471
MosOpn3	0.2	2	12	861
MosOpn3	0.2	2	13	786
MosOpn3	0.5	3	1	516
MosOpn3	0.05	3	2	486
MosOpn3	0.05	3	3	875
MosOpn3	0.05	3	4	725
MosOpn3	0.05	3	5	531
MosOpn3	0.05	3	6	946
MosOpn3	0.05	3	7	831
MosOpn3	0.2	3	8	621
MosOpn3	0.2	3	9	591
MosOpn3	0.2	3	10	756
MosOpn3	0.2	3	11	667
MosOpn3	0.2	3	12	336
MosOpn3	0.2	3	13	471
MosOpn3	0.5	4	1	875
MosOpn3	0.05	4	2	441
MosOpn3	0.05	4	3	696
MosOpn3	0.05	4	4	561
MosOpn3	0.05	4	5	681
MosOpn3	0.05	4	6	531
MosOpn3	0.05	4	7	666
MosOpn3	0.2	4	8	321
MosOpn3	0.2	4	9	216
MosOpn3	0.2	4	10	426
MosOpn3	0.2	4	11	336
MosOpn3	0.2	4	12	501
MosOpn3	0.2	4	13	501
PufTMT	0.5	4	1	606
PufTMT	0.2	4	8	1025
PufTMT	0.2	4	10	995

## Sheet: C
Line	light intensity	Sample_number	Trial_number	Time to resumption of heartbeat (ms)
LamPPGi	0.4	1	1	19507
LamPPGi	0.2	1	8	1415
LamPPGi	0.2	1	9	1700
LamPPGi	0.4	2	1	13788
LamPPGi	0.05	2	2	2111
LamPPGi	0.05	2	4	1430
LamPPGi	0.05	2	7	1490
LamPPGi	0.2	2	9	5655
LamPPGi	0.2	2	10	3633
LamPPGi	0.2	2	11	2149
LamPPGi	0.2	2	12	1894
LamPPGi	0.2	2	13	2089
LamPPGi	0.2	2	14	1759
LamPPGi	0.4	3	1	11192
LamPPGi	0.2	3	8	4112
LamPPGi	0.2	3	9	2104
LamPPGi	0.2	3	10	1685
LamPPGi	0.4	4	1	19396
LamPPGi	0.05	4	2	2239
LamPPGi	0.05	4	4	1954
LamPPGi	0.05	4	5	2254
LamPPGi	0.05	4	6	3348
LamPPGi	0.05	4	7	2134
LamPPGi	0.2	4	8	3333
LamPPGi	0.2	4	9	3797
LamPPGi	0.2	4	10	1861
LamPPGi	0.2	4	11	1055
LamPPGi	0.2	4	12	1758
LamPPGi	0.2	4	13	1879
PufTMT	0.5	1	1	1175
PufTMT	0.5	2	1	2224
PufTMT	0.5	3	1	9491
PufTMT	0.05	3	2	2224
PufTMT	0.05	3	3	1235
PufTMT	0.2	3	8	7367
PufTMT	0.2	3	9	4861
PufTMT	0.2	3	10	4247
PufTMT	0.2	3	11	2134
PufTMT	0.2	3	12	1835
PufTMT	0.2	3	13	1699
MosOpn3	0.5	1	1	9836
MosOpn3	0.05	1	2	5682
MosOpn3	0.05	1	3	19780
MosOpn3	0.05	1	4	8322
MosOpn3	0.05	1	5	3497
MosOpn3	0.05	1	6	7378
MosOpn3	0.2	1	8	11274
MosOpn3	0.2	1	9	12922
MosOpn3	0.2	1	10	4876
MosOpn3	0.2	1	11	11769
MosOpn3	0.2	1	12	11447
MosOpn3	0.2	1	13	12263
MosOpn3	0.5	2	1	15724
MosOpn3	0.05	2	2	11814
MosOpn3	0.05	2	3	11619
MosOpn3	0.05	2	4	11499
MosOpn3	0.05	2	5	10600
MosOpn3	0.05	2	6	10240
MosOpn3	0.05	2	7	8907
MosOpn3	0.2	2	8	8652
MosOpn3	0.2	2	9	8682
MosOpn3	0.2	2	10	9551
MosOpn3	0.2	2	11	11739
MosOpn3	0.2	2	12	7568
MosOpn3	0.2	2	13	4951
MosOpn3	0.5	3	1	9401
MosOpn3	0.05	3	2	5775
MosOpn3	0.05	3	3	6824
MosOpn3	0.05	3	4	12368
MosOpn3	0.05	3	5	9131
MosOpn3	0.05	3	6	6228
MosOpn3	0.05	3	7	14381
MosOpn3	0.2	3	8	11394
MosOpn3	0.2	3	9	8682
MosOpn3	0.2	3	10	9896
MosOpn3	0.2	3	11	6554
MosOpn3	0.2	3	12	8143
MosOpn3	0.2	3	13	8038
MosOpn3	0.5	4	1	13597
MosOpn3	0.05	4	2	8802
MosOpn3	0.05	4	3	7918
MosOpn3	0.05	4	4	12533
MosOpn3	0.05	4	5	10750
MosOpn3	0.05	4	6	10420
MosOpn3	0.05	4	7	10915
MosOpn3	0.2	4	8	11110
MosOpn3	0.2	4	9	7648
MosOpn3	0.2	4	10	7213
MosOpn3	0.2	4	11	5865
MosOpn3	0.2	4	12	10525
MosOpn3	0.2	4	13	8322
PufTMT	0.5	4	1	19096
PufTMT	0.2	4	8	15260
PufTMT	0.2	4	10	5221
