# Supplementary material for: Optogenetic manipulation of Gq- and Gi/o-coupled receptor signaling in neurons and heart muscle cells
Source: eLife. 2023 Aug 17;12:e83974. doi: 10.7554/eLife.83974 (PMC10435233; doi:10.7554/eLife.83974)
Supplement: Figure 4—figure supplement 3—source data 1. [file elife-83974-fig4-figsupp3-data1.xlsx]

## Sheet: A
time	atrium or ventricle	wave	peak or no peak
0	ventricle	71.4286	no peak
0.0149925	ventricle	58.4034	no peak
0.029985	ventricle	42.0168	no peak
0.0449775	ventricle	25.6303	no peak
0.05997	ventricle	13.0252	no peak
0.0749625	ventricle	2.94118	no peak
0.089955	ventricle	0	no peak
0.104948	ventricle	7.56303	no peak
0.11994	ventricle	20.1681	no peak
0.134933	ventricle	40.3361	no peak
0.149925	ventricle	57.1429	no peak
0.164918	ventricle	71.0084	no peak
0.17991	ventricle	86.1345	no peak
0.194903	ventricle	100	peak
0.209895	ventricle	98.7395	no peak
0.224888	ventricle	98.7395	no peak
0.23988	ventricle	94.1176	no peak
0.254873	ventricle	77.7311	no peak
0.269865	ventricle	65.1261	no peak
0.284858	ventricle	51.2605	no peak
0.29985	ventricle	38.6555	no peak
0.314843	ventricle	32.3529	no peak
0.329835	ventricle	28.9916	no peak
0.344828	ventricle	24.3697	no peak
0.35982	ventricle	23.5294	no peak
0.374813	ventricle	28.5714	no peak
0.389805	ventricle	36.1345	no peak
0.404798	ventricle	42.0168	no peak
0.41979	ventricle	50.8403	no peak
0.434783	ventricle	63.8655	no peak
0.449775	ventricle	73.9496	no peak
0.464768	ventricle	84.0336	no peak
0.47976	ventricle	86.1345	peak
0.494753	ventricle	81.9328	no peak
0.509745	ventricle	74.3697	no peak
0.524738	ventricle	60.084	no peak
0.53973	ventricle	40.3361	no peak
0.554723	ventricle	36.5546	no peak
0.569715	ventricle	27.3109	no peak
0.584708	ventricle	20.1681	no peak
0.5997	ventricle	15.1261	no peak
0.614693	ventricle	10.9244	no peak
0.629685	ventricle	4.20168	no peak
0.644678	ventricle	13.8655	no peak
0.65967	ventricle	28.5714	no peak
0.674663	ventricle	43.6975	no peak
0	atrium	44.6768	no peak
0.0149925	atrium	34.7032	no peak
0.029985	atrium	22.9993	no peak
0.0449775	atrium	13.6025	no peak
0.05997	atrium	6.84932	no peak
0.0749625	atrium	1.49003	no peak
0.089955	atrium	2.11488	no peak
0.104948	atrium	13.242	no peak
0.11994	atrium	34.1985	no peak
0.134933	atrium	56.9815	no peak
0.149925	atrium	77.938	no peak
0.164918	atrium	95.0012	no peak
0.17991	atrium	98.2937	peak
0.194903	atrium	88.272	no peak
0.209895	atrium	77.241	no peak
0.224888	atrium	68.4691	no peak
0.23988	atrium	60.8508	no peak
0.254873	atrium	55.5636	no peak
0.269865	atrium	49.3391	no peak
0.284858	atrium	38.5004	no peak
0.29985	atrium	26.9647	no peak
0.314843	atrium	15.7174	no peak
0.329835	atrium	6.65705	no peak
0.344828	atrium	4.15765	no peak
0.35982	atrium	5.31122	no peak
0.374813	atrium	15.9096	no peak
0.389805	atrium	39.3415	no peak
0.404798	atrium	63.7106	no peak
0.41979	atrium	82.4561	no peak
0.434783	atrium	98.1735	no peak
0.449775	atrium	100	peak
0.464768	atrium	88.1519	no peak
0.47976	atrium	76.0634	no peak
0.494753	atrium	66.3302	no peak
0.509745	atrium	57.9188	no peak
0.524738	atrium	51.3578	no peak
0.53973	atrium	43.7635	no peak
0.554723	atrium	32.2278	no peak
0.569715	atrium	21.6294	no peak
0.584708	atrium	11.6799	no peak
0.5997	atrium	4.20572	no peak
0.614693	atrium	0	no peak
0.629685	atrium	3.79716	no peak
0.644678	atrium	18.6013	no peak
0.65967	atrium	39.8702	no peak
0.674663	atrium	62.0284	no peak

## Sheet: B
sample	before light or after light	time difference between atrium and ventricle (ms)
1	before	0.17991
1	before	0.0449775
1	before	0.0449775
1	before	0.029985
1	before	0.0149925
1	before	0.0149925
1	before	0.0149925
1	before	0.029985
1	before	0.05997
1	before	0.029985
1	before	0.0149925
1	before	0.029985
1	before	0.029985
1	before	0.0449775
1	before	0.029985
1	before	0.0449775
1	before	0.0449775
1	before	0.05997
1	before	0.029985
1	before	0.0449775
1	before	0.05997
1	before	0.0449775
1	before	0.029985
1	before	0.0149925
1	before	0.029985
1	before	0.0449775
1	before	0.05997
1	before	0.029985
1	before	0.05997
1	before	0.05997
1	before	0.029985
1	before	0.0149925
1	before	0.05997
1	before	0.029985
1	before	0.0449775
1	before	0.0149925
1	before	0.0449775
1	before	0.0749625
1	before	0.0149925
1	after	0.05997
1	after	0.05997
1	after	0.0749625
1	after	0.0749625
1	after	0.0749625
1	after	0.05997
1	after	0.05997
1	after	0.0749625
1	after	0.0749625
1	after	0.0449775
1	after	0.0749625
1	after	0.0749625
1	after	0.0749625
1	after	0.05997
1	after	0.0449775
1	after	0.05997
1	after	0.0749625
1	after	0.104948
1	after	0.0449775
1	after	0.104948
1	after	0.05997
1	after	0.05997
1	after	0.05997
1	after	0.089955
1	after	0.05997
1	after	0.089955
1	after	0.0449775
1	after	0.0749625
1	after	0.0749625
1	after	0.089955
1	after	0.05997
1	after	0.089955
1	after	0.05997
1	after	0.05997
1	after	0.029985
1	after	0.05997
1	after	0.0749625
1	after	0.104948
1	after	0.089955
1	after	0.0749625
1	after	0.089955
1	after	0.05997
1	after	0.05997
1	after	0.05997
1	after	0.0449775
1	after	0.0449775
1	after	0.0749625
1	after	0.089955
1	after	0.0749625
1	after	0.0749625
1	after	0.0749625
1	after	0.089955
1	after	0.0749625
1	after	0.05997
1	after	0.089955
1	after	0.0749625
1	after	0.494753
2	before	0.23988
2	before	0.029985
2	before	0.029985
2	before	0.0449775
2	before	0.0449775
2	before	0.0149925
2	before	0.0449775
2	before	0.029985
2	before	0.0149925
2	before	0.0449775
2	before	0.0149925
2	before	0.0149925
2	before	0.0149925
2	before	0.029985
2	before	0.0449775
2	before	0.029985
2	before	0.0449775
2	before	0.0149925
2	before	0.029985
2	before	0.029985
2	before	0.0149925
2	before	0.0149925
2	before	0.0149925
2	before	0.029985
2	before	0.0149925
2	before	0.0449775
2	before	0.029985
2	before	0.029985
2	before	0.0149925
2	before	0.0449775
2	before	0.0149925
2	before	0.029985
2	before	0.0449775
2	before	0.0149925
2	before	0.0149925
2	before	0.029985
2	before	0.029985
2	before	0.0449775
2	before	0.0449775
2	after	0.149925
2	after	0.0449775
2	after	0.05997
2	after	0.029985
2	after	0.0449775
2	after	0.0449775
2	after	0.05997
2	after	0.029985
2	after	0.0449775
2	after	0.029985
2	after	0.0449775
2	after	0.029985
2	after	0.029985
2	after	0.029985
2	after	0.0449775
2	after	0.029985
2	after	0.0449775
2	after	0.0149925
2	after	0.0149925
2	after	0.0149925
2	after	0.0149925
2	after	0.0149925
2	after	0.05997
2	after	0.0449775
2	after	0.029985
2	after	0.0149925
2	after	0.029985
2	after	0.209895
2	after	0.029985
2	after	0.0149925
2	after	0.029985
2	after	0.05997
2	after	0.0149925
2	after	0.029985
2	after	0.0149925
2	after	0.0149925
2	after	0.0449775
2	after	0.0149925
2	after	0.05997
2	after	0.029985
2	after	0.0149925
2	after	0.0149925
3	before	0.23988
3	before	0.029985
3	before	0.029985
3	before	0.0449775
3	before	0.0449775
3	before	0.0149925
3	before	0.0449775
3	before	0.029985
3	before	0.0149925
3	before	0.0449775
3	before	0.0149925
3	before	0.0149925
3	before	0.0149925
3	before	0.029985
3	before	0.0449775
3	before	0.029985
3	before	0.0449775
3	before	0.0149925
3	before	0.029985
3	before	0.029985
3	before	0.0149925
3	before	0.0149925
3	before	0.0149925
3	before	0.029985
3	before	0.0149925
3	before	0.0449775
3	before	0.029985
3	before	0.029985
3	before	0.0149925
3	before	0.0449775
3	before	0.0149925
3	before	0.029985
3	before	0.0449775
3	before	0.0149925
3	before	0.0149925
3	before	0.029985
3	before	0.029985
3	before	0.0449775
3	before	0.0449775
3	after	0.149925
3	after	0.0449775
3	after	0.05997
3	after	0.029985
3	after	0.0449775
3	after	0.0449775
3	after	0.05997
3	after	0.029985
3	after	0.0449775
3	after	0.029985
3	after	0.0449775
3	after	0.029985
3	after	0.029985
3	after	0.029985
3	after	0.0449775
3	after	0.029985
3	after	0.0449775
3	after	0.0149925
3	after	0.0149925
3	after	0.0149925
3	after	0.0149925
3	after	0.0149925
3	after	0.05997
3	after	0.0449775
3	after	0.029985
3	after	0.0149925
3	after	0.029985
3	after	0.209895
3	after	0.029985
3	after	0.0149925
3	after	0.029985
3	after	0.05997
3	after	0.0149925
3	after	0.029985
3	after	0.0149925
3	after	0.0149925
3	after	0.0449775
3	after	0.0149925
3	after	0.05997
3	after	0.029985
3	after	0.0149925
3	after	0.0149925
4	before	0.05997
4	before	0.0149925
4	before	0.0149925
4	before	0.0449775
4	before	0.0149925
4	before	0.029985
4	before	0.05997
4	before	0.0149925
4	before	0.0149925
4	before	0.0149925
4	before	0.0149925
4	before	0.0149925
4	before	0.0449775
4	before	0.0149925
4	before	0.0149925
4	before	0.029985
4	before	0.0149925
4	before	0.029985
4	before	0.0149925
4	before	0.0449775
4	before	0.05997
4	after	0.23988
4	after	0.05997
4	after	0.224888
4	after	0.269865
5	before	0.29985
5	before	0.0149925
5	before	0.104948
5	before	0.0149925
5	before	0.0149925
5	before	0.0149925
5	before	0.0149925
5	before	0.0149925
5	before	0.0149925
5	before	0.0149925
5	before	0.0149925
5	before	0.284858
5	before	0.0149925
5	before	0.0149925
5	before	0.0149925
5	before	0.0149925
5	before	0.0149925
5	before	0.0149925
5	before	0.0149925
5	before	0.0149925
5	before	0.029985
5	before	0.0149925
5	before	0.089955
5	after	0.089955
5	after	0.254873
6	before	0.0449775
6	before	0.209895
6	before	0.029985
6	before	0.029985
6	before	0.0149925
6	before	0.029985
6	before	0.0149925
6	before	0.029985
6	before	0.0149925
6	before	0.0149925
6	before	0.0149925
6	before	0.029985
6	before	0.0149925
6	before	0.0149925
6	before	0.0149925
6	before	0.0749625
6	before	0.0149925
6	before	0.0149925
6	before	0.0149925
6	before	0.0449775
6	before	0.0149925
6	before	0.029985
6	before	0.0149925
6	before	0.0149925
6	before	0.029985
6	after	0.134933
6	after	0.029985
6	after	0.134933
6	after	0.029985
6	after	0.029985
6	after	0.104948
6	after	0.0149925
6	after	0.0449775
6	after	0.104948
6	after	0.11994
6	after	0.0449775
6	after	0.0749625
6	after	0.164918
6	after	0.029985
6	after	0.05997
6	after	0.0449775
6	after	0.029985
6	after	0.089955
6	after	0.0149925
6	after	0.0749625
6	after	0.11994
6	after	0.089955
6	after	0.104948
6	after	0.0149925
6	after	0.029985
6	after	0.0749625
6	after	0.0449775
6	after	0.029985
6	after	0.0149925
6	after	0.0749625
6	after	0.104948
6	after	0.11994
7	before	0.029985
7	before	0.23988
7	before	0.0449775
7	before	0.0149925
7	before	0.0149925
7	before	0.0749625
7	before	0.029985
7	before	0.0149925
7	before	0.0749625
7	before	0.029985
7	before	0.0449775
7	before	0.05997
7	before	0.0449775
7	before	0.029985
7	before	0.05997
7	before	0.0149925
7	before	0.0749625
7	before	0.05997
7	before	0.029985
7	before	0.0449775
7	before	0.0449775
7	before	0.05997
7	before	0.0749625
7	before	0.0449775
7	before	0.0449775
7	before	0.05997
7	before	0.05997
7	before	0.0449775
7	before	0.0749625
7	before	0.0149925
7	before	0.089955
7	before	0.0449775
7	before	0.0749625
7	before	0.0749625
7	before	0.029985
7	after	0.0449775
7	after	0.0149925
7	after	0.0149925
7	after	0.104948
7	after	0.0449775
7	after	0.0449775
7	after	0.05997
7	after	0.05997
7	after	0.0449775
7	after	0.0449775
7	after	0.0749625
7	after	0.0449775
7	after	0.0749625
7	after	0.0449775
7	after	0.089955
