# Supplementary material for: Optogenetic manipulation of Gq- and Gi/o-coupled receptor signaling in neurons and heart muscle cells
Source: eLife. 2023 Aug 17;12:e83974. doi: 10.7554/eLife.83974 (PMC10435233; doi:10.7554/eLife.83974)
Supplement: Figure 4—source data 1. [file elife-83974-fig4-data1.xlsx]

## Sheet: B
Line	Frame	X	Y
MosOpn3	1	-10	1.02976
MosOpn3	2	-9.96667	1.0296
MosOpn3	3	-9.93333	1.02915
MosOpn3	4	-9.9	1.02919
MosOpn3	5	-9.86667	1.03372
MosOpn3	6	-9.83333	1.02735
MosOpn3	7	-9.8	1.02544
MosOpn3	8	-9.76667	1.02829
MosOpn3	9	-9.73333	1.02887
MosOpn3	10	-9.7	1.01172
MosOpn3	11	-9.66667	1.01286
MosOpn3	12	-9.63333	1.01286
MosOpn3	13	-9.6	1.01286
MosOpn3	14	-9.56667	1.01286
MosOpn3	15	-9.53333	1.01286
MosOpn3	16	-9.5	1
MosOpn3	17	-9.46667	1
MosOpn3	18	-9.43333	1
MosOpn3	19	-9.4	1
MosOpn3	20	-9.36667	1
MosOpn3	21	-9.33333	1.00686
MosOpn3	22	-9.3	1.00686
MosOpn3	23	-9.26667	1.00457
MosOpn3	24	-9.23333	0.997714
MosOpn3	25	-9.2	0.993141
MosOpn3	26	-9.16667	0.991426
MosOpn3	27	-9.13333	1.01037
MosOpn3	28	-9.1	1.012
MosOpn3	29	-9.06667	1.01429
MosOpn3	30	-9.03333	1.00029
MosOpn3	31	-9	0.99114
MosOpn3	32	-8.96667	0.993427
MosOpn3	33	-8.93333	0.993427
MosOpn3	34	-8.9	1.01919
MosOpn3	35	-8.86667	1.0158
MosOpn3	36	-8.83333	1.01409
MosOpn3	37	-8.8	1.00494
MosOpn3	38	-8.76667	0.990569
MosOpn3	39	-8.73333	0.985996
MosOpn3	40	-8.7	1.002
MosOpn3	41	-8.66667	1.01854
MosOpn3	42	-8.63333	1.01866
MosOpn3	43	-8.6	1.01396
MosOpn3	44	-8.56667	0.990569
MosOpn3	45	-8.53333	0.992855
MosOpn3	46	-8.5	0.988282
MosOpn3	47	-8.46667	1.00494
MosOpn3	48	-8.43333	1.01637
MosOpn3	49	-8.4	1.0169
MosOpn3	50	-8.36667	1.00657
MosOpn3	51	-8.33333	0.997428
MosOpn3	52	-8.3	0.998857
MosOpn3	53	-8.26667	0.990569
MosOpn3	54	-8.23333	1.00951
MosOpn3	55	-8.2	1.0118
MosOpn3	56	-8.16667	1.01462
MosOpn3	57	-8.13333	1.00429
MosOpn3	58	-8.1	0.995142
MosOpn3	59	-8.06667	0.988282
MosOpn3	60	-8.03333	0.990569
MosOpn3	61	-8	1.00429
MosOpn3	62	-7.96667	1.01409
MosOpn3	63	-7.93333	1.01747
MosOpn3	64	-7.9	0.997428
MosOpn3	65	-7.86667	0.985996
MosOpn3	66	-7.83333	0.990569
MosOpn3	67	-7.8	0.991426
MosOpn3	68	-7.76667	1.02005
MosOpn3	69	-7.73333	1.01952
MosOpn3	70	-7.7	1.01409
MosOpn3	71	-7.66667	0.992855
MosOpn3	72	-7.63333	0.985996
MosOpn3	73	-7.6	0.985996
MosOpn3	74	-7.56667	0.985996
MosOpn3	75	-7.53333	1.01952
MosOpn3	76	-7.5	1.01494
MosOpn3	77	-7.46667	1.0109
MosOpn3	78	-7.43333	0.995142
MosOpn3	79	-7.4	0.992855
MosOpn3	80	-7.36667	0.988282
MosOpn3	81	-7.33333	0.999714
MosOpn3	82	-7.3	1.01919
MosOpn3	83	-7.26667	1.01637
MosOpn3	84	-7.23333	1.01266
MosOpn3	85	-7.2	1.00065
MosOpn3	86	-7.16667	0.991508
MosOpn3	87	-7.13333	0.984567
MosOpn3	88	-7.1	0.991426
MosOpn3	89	-7.06667	1.01637
MosOpn3	90	-7.03333	1.01115
MosOpn3	91	-7	1.00951
MosOpn3	92	-6.96667	0.998081
MosOpn3	93	-6.93333	0.990569
MosOpn3	94	-6.9	0.990569
MosOpn3	95	-6.86667	1.00886
MosOpn3	96	-6.83333	1.01919
MosOpn3	97	-6.8	1.01637
MosOpn3	98	-6.76667	1.00494
MosOpn3	99	-6.73333	0.990569
MosOpn3	100	-6.7	0.98371
MosOpn3	101	-6.66667	0.990569
MosOpn3	102	-6.63333	1.0118
MosOpn3	103	-6.6	1.0118
MosOpn3	104	-6.56667	1.01168
MosOpn3	105	-6.53333	1.00951
MosOpn3	106	-6.5	0.985424
MosOpn3	107	-6.46667	0.98371
MosOpn3	108	-6.43333	0.988282
MosOpn3	109	-6.4	0.997428
MosOpn3	110	-6.36667	1.00437
MosOpn3	111	-6.33333	1.0118
MosOpn3	112	-6.3	0.995142
MosOpn3	113	-6.26667	0.992855
MosOpn3	114	-6.23333	0.985996
MosOpn3	115	-6.2	0.995999
MosOpn3	116	-6.16667	1.02462
MosOpn3	117	-6.13333	1.0118
MosOpn3	118	-6.1	1.01462
MosOpn3	119	-6.06667	1.00494
MosOpn3	120	-6.03333	0.990569
MosOpn3	121	-6	0.985424
MosOpn3	122	-5.96667	0.992855
MosOpn3	123	-5.93333	1.01919
MosOpn3	124	-5.9	1.0118
MosOpn3	125	-5.86667	1.00951
MosOpn3	126	-5.83333	1.00494
MosOpn3	127	-5.8	0.992855
MosOpn3	128	-5.76667	0.990569
MosOpn3	129	-5.73333	1.00666
MosOpn3	130	-5.7	1.02266
MosOpn3	131	-5.66667	1.02037
MosOpn3	132	-5.63333	1.01409
MosOpn3	133	-5.6	0.992855
MosOpn3	134	-5.56667	0.985996
MosOpn3	135	-5.53333	0.985996
MosOpn3	136	-5.5	1.00265
MosOpn3	137	-5.46667	1.02148
MosOpn3	138	-5.43333	1.02205
MosOpn3	139	-5.4	1.01008
MosOpn3	140	-5.36667	1.00029
MosOpn3	141	-5.33333	0.990569
MosOpn3	142	-5.3	0.98371
MosOpn3	143	-5.26667	1.00886
MosOpn3	144	-5.23333	1.01866
MosOpn3	145	-5.2	1.01396
MosOpn3	146	-5.16667	0.999714
MosOpn3	147	-5.13333	0.988282
MosOpn3	148	-5.1	0.985996
MosOpn3	149	-5.06667	0.985996
MosOpn3	150	-5.03333	1.00951
MosOpn3	151	-5	1.02094
MosOpn3	152	-4.96667	1.0229
MosOpn3	153	-4.93333	1.00808
MosOpn3	154	-4.9	0.992855
MosOpn3	155	-4.86667	0.985996
MosOpn3	156	-4.83333	0.992855
MosOpn3	157	-4.8	1.00886
MosOpn3	158	-4.76667	1.01343
MosOpn3	159	-4.73333	1.01111
MosOpn3	160	-4.7	0.990569
MosOpn3	161	-4.66667	0.987711
MosOpn3	162	-4.63333	0.985996
MosOpn3	163	-4.6	0.995142
MosOpn3	164	-4.56667	1.01176
MosOpn3	165	-4.53333	1.0169
MosOpn3	166	-4.5	1.00951
MosOpn3	167	-4.46667	1.00037
MosOpn3	168	-4.43333	0.991222
MosOpn3	169	-4.4	0.988282
MosOpn3	170	-4.36667	1.0058
MosOpn3	171	-4.33333	1.02005
MosOpn3	172	-4.3	1.01037
MosOpn3	173	-4.26667	1.00723
MosOpn3	174	-4.23333	0.993427
MosOpn3	175	-4.2	0.987711
MosOpn3	176	-4.16667	0.987711
MosOpn3	177	-4.13333	1.00057
MosOpn3	178	-4.1	1.01396
MosOpn3	179	-4.06667	1.01952
MosOpn3	180	-4.03333	1.0058
MosOpn3	181	-4	0.998285
MosOpn3	182	-3.96667	0.98914
MosOpn3	183	-3.93333	0.984567
MosOpn3	184	-3.9	1.00514
MosOpn3	185	-3.86667	1.01429
MosOpn3	186	-3.83333	1.01637
MosOpn3	187	-3.8	1.00808
MosOpn3	188	-3.76667	0.995999
MosOpn3	189	-3.73333	0.991426
MosOpn3	190	-3.7	0.994284
MosOpn3	191	-3.66667	1.00723
MosOpn3	192	-3.63333	1.0118
MosOpn3	193	-3.6	1.01462
MosOpn3	194	-3.56667	1.00494
MosOpn3	195	-3.53333	0.988282
MosOpn3	196	-3.5	0.988282
MosOpn3	197	-3.46667	0.992855
MosOpn3	198	-3.43333	1.00951
MosOpn3	199	-3.4	1.01462
MosOpn3	200	-3.36667	1.01176
MosOpn3	201	-3.33333	0.995142
MosOpn3	202	-3.3	0.985996
MosOpn3	203	-3.26667	0.98914
MosOpn3	204	-3.23333	1.00351
MosOpn3	205	-3.2	1.01747
MosOpn3	206	-3.16667	1.01494
MosOpn3	207	-3.13333	1.01547
MosOpn3	208	-3.1	1.00065
MosOpn3	209	-3.06667	0.993713
MosOpn3	210	-3.03333	0.991426
MosOpn3	211	-3	0.998285
MosOpn3	212	-2.96667	1.01952
MosOpn3	213	-2.93333	1.01409
MosOpn3	214	-2.9	1.01409
MosOpn3	215	-2.86667	0.99457
MosOpn3	216	-2.83333	0.990569
MosOpn3	217	-2.8	0.990569
MosOpn3	218	-2.76667	1.0098
MosOpn3	219	-2.73333	1.02866
MosOpn3	220	-2.7	1.02809
MosOpn3	221	-2.66667	1.02809
MosOpn3	222	-2.63333	0.993713
MosOpn3	223	-2.6	0.994284
MosOpn3	224	-2.56667	0.993713
MosOpn3	225	-2.53333	0.995999
MosOpn3	226	-2.5	1.01715
MosOpn3	227	-2.46667	1.01409
MosOpn3	228	-2.43333	1.0118
MosOpn3	229	-2.4	0.995713
MosOpn3	230	-2.36667	1.00029
MosOpn3	231	-2.33333	1.002
MosOpn3	232	-2.3	1.01409
MosOpn3	233	-2.26667	1.01409
MosOpn3	234	-2.23333	1.01494
MosOpn3	235	-2.2	1.00286
MosOpn3	236	-2.16667	0.986568
MosOpn3	237	-2.13333	0.984567
MosOpn3	238	-2.1	0.98371
MosOpn3	239	-2.06667	0.997428
MosOpn3	240	-2.03333	1.00666
MosOpn3	241	-2	1.01645
MosOpn3	242	-1.96667	0.997428
MosOpn3	243	-1.93333	0.993427
MosOpn3	244	-1.9	0.985996
MosOpn3	245	-1.86667	0.989997
MosOpn3	246	-1.83333	1.00951
MosOpn3	247	-1.8	1.01462
MosOpn3	248	-1.76667	1.01462
MosOpn3	249	-1.73333	0.998653
MosOpn3	250	-1.7	0.99408
MosOpn3	251	-1.66667	0.988282
MosOpn3	252	-1.63333	0.998939
MosOpn3	253	-1.6	1.01547
MosOpn3	254	-1.56667	1.01409
MosOpn3	255	-1.53333	1.01703
MosOpn3	256	-1.5	0.998081
MosOpn3	257	-1.46667	0.988854
MosOpn3	258	-1.43333	0.991426
MosOpn3	259	-1.4	1.0058
MosOpn3	260	-1.36667	1.01266
MosOpn3	261	-1.33333	1.01723
MosOpn3	262	-1.3	1.00723
MosOpn3	263	-1.26667	0.998653
MosOpn3	264	-1.23333	0.986568
MosOpn3	265	-1.2	0.988282
MosOpn3	266	-1.16667	0.998285
MosOpn3	267	-1.13333	1.01723
MosOpn3	268	-1.1	1.0218
MosOpn3	269	-1.06667	1.00951
MosOpn3	270	-1.03333	1.00122
MosOpn3	271	-1	0.986853
MosOpn3	272	-0.966667	0.98914
MosOpn3	273	-0.933333	1.008
MosOpn3	274	-0.9	1.0218
MosOpn3	275	-0.866667	1.02148
MosOpn3	276	-0.833333	1.0118
MosOpn3	277	-0.8	0.998081
MosOpn3	278	-0.766667	0.990569
MosOpn3	279	-0.733333	0.99114
MosOpn3	280	-0.7	1.00886
MosOpn3	281	-0.666667	1.01409
MosOpn3	282	-0.633333	1.01625
MosOpn3	283	-0.6	1.00951
MosOpn3	284	-0.566667	0.994284
MosOpn3	285	-0.533333	0.986568
MosOpn3	286	-0.5	0.991426
MosOpn3	287	-0.466667	1.00686
MosOpn3	288	-0.433333	1.02123
MosOpn3	289	-0.4	1.01666
MosOpn3	290	-0.366667	1.00523
MosOpn3	291	-0.333333	0.993713
MosOpn3	292	-0.3	0.986853
MosOpn3	293	-0.266667	0.999714
MosOpn3	294	-0.233333	1.01462
MosOpn3	295	-0.2	1.01351
MosOpn3	296	-0.166667	1.01931
MosOpn3	297	-0.133333	1.00265
MosOpn3	298	-0.1	0.995142
MosOpn3	299	-0.0666667	0.980852
MosOpn3	300	-0.0333333	0.989997
MosOpn3	301	0	1.01633
MosOpn3	302	0.0333333	1.01286
MosOpn3	303	0.0666667	1.00894
MosOpn3	304	0.1	0.999796
MosOpn3	305	0.133333	0.990569
MosOpn3	306	0.166667	0.988282
MosOpn3	307	0.2	1.00429
MosOpn3	308	0.233333	1.01637
MosOpn3	309	0.266667	1.01409
MosOpn3	310	0.3	1.00723
MosOpn3	311	0.333333	0.994284
MosOpn3	312	0.366667	0.991426
MosOpn3	313	0.4	0.979137
MosOpn3	314	0.433333	0.991426
MosOpn3	315	0.466667	0.990569
MosOpn3	316	0.5	1.00429
MosOpn3	317	0.533333	1.00657
MosOpn3	318	0.566667	1.01168
MosOpn3	319	0.6	1.00429
MosOpn3	320	0.633333	0.988282
MosOpn3	321	0.666667	0.985996
MosOpn3	322	0.7	0.985996
MosOpn3	323	0.733333	0.988282
MosOpn3	324	0.766667	0.990569
MosOpn3	325	0.8	0.995142
MosOpn3	326	0.833333	0.988282
MosOpn3	327	0.866667	0.995142
MosOpn3	328	0.9	0.992855
MosOpn3	329	0.933333	0.992284
MosOpn3	330	0.966667	0.997714
MosOpn3	331	1	0.998285
MosOpn3	332	1.03333	0.999714
MosOpn3	333	1.06667	1.00029
MosOpn3	334	1.1	1.00714
MosOpn3	335	1.13333	1.00486
MosOpn3	336	1.16667	1.00029
MosOpn3	337	1.2	0.998571
MosOpn3	338	1.23333	1.00314
MosOpn3	339	1.26667	1.00314
MosOpn3	340	1.3	1.00257
MosOpn3	341	1.33333	1.00714
MosOpn3	342	1.36667	1.00486
MosOpn3	343	1.4	1.00029
MosOpn3	344	1.43333	1.00029
MosOpn3	345	1.46667	0.997428
MosOpn3	346	1.5	0.999714
MosOpn3	347	1.53333	0.993713
MosOpn3	348	1.56667	0.992855
MosOpn3	349	1.6	0.993713
MosOpn3	350	1.63333	0.993713
MosOpn3	351	1.66667	0.993713
MosOpn3	352	1.7	0.992855
MosOpn3	353	1.73333	1.00343
MosOpn3	354	1.76667	1.00286
MosOpn3	355	1.8	1.00286
MosOpn3	356	1.83333	1.00057
MosOpn3	357	1.86667	0.998285
MosOpn3	358	1.9	0.998285
MosOpn3	359	1.93333	1.00057
MosOpn3	360	1.96667	0.995142
MosOpn3	361	2	0.995713
MosOpn3	362	2.03333	0.995713
MosOpn3	363	2.06667	1.00029
MosOpn3	364	2.1	0.995713
MosOpn3	365	2.13333	0.995713
MosOpn3	366	2.16667	0.992855
MosOpn3	367	2.2	0.995713
MosOpn3	368	2.23333	0.995713
MosOpn3	369	2.26667	0.996571
MosOpn3	370	2.3	0.995713
MosOpn3	371	2.33333	0.992855
MosOpn3	372	2.36667	0.995713
MosOpn3	373	2.4	0.998857
MosOpn3	374	2.43333	0.990569
MosOpn3	375	2.46667	0.993713
MosOpn3	376	2.5	0.993713
MosOpn3	377	2.53333	0.993713
MosOpn3	378	2.56667	0.994284
MosOpn3	379	2.6	0.991426
MosOpn3	380	2.63333	0.992855
MosOpn3	381	2.66667	0.993427
MosOpn3	382	2.7	0.994284
MosOpn3	383	2.73333	0.994284
MosOpn3	384	2.76667	0.994284
MosOpn3	385	2.8	0.993713
MosOpn3	386	2.83333	0.995999
MosOpn3	387	2.86667	0.994284
MosOpn3	388	2.9	0.993713
MosOpn3	389	2.93333	0.993713
MosOpn3	390	2.96667	0.996571
MosOpn3	391	3	0.995999
MosOpn3	392	3.03333	0.992855
MosOpn3	393	3.06667	0.995142
MosOpn3	394	3.1	0.995999
MosOpn3	395	3.13333	0.995999
MosOpn3	396	3.16667	0.995999
MosOpn3	397	3.2	0.995999
MosOpn3	398	3.23333	0.995999
MosOpn3	399	3.26667	0.993713
MosOpn3	400	3.3	0.993713
MosOpn3	401	3.33333	0.995999
MosOpn3	402	3.36667	0.993713
MosOpn3	403	3.4	0.993713
MosOpn3	404	3.43333	0.993713
MosOpn3	405	3.46667	0.995142
MosOpn3	406	3.5	0.998
MosOpn3	407	3.53333	0.99457
MosOpn3	408	3.56667	0.998285
MosOpn3	409	3.6	0.998285
MosOpn3	410	3.63333	0.995999
MosOpn3	411	3.66667	0.993141
MosOpn3	412	3.7	0.995427
MosOpn3	413	3.73333	0.993713
MosOpn3	414	3.76667	0.992855
MosOpn3	415	3.8	0.995999
MosOpn3	416	3.83333	0.995142
MosOpn3	417	3.86667	0.995142
MosOpn3	418	3.9	0.997428
MosOpn3	419	3.93333	0.995142
MosOpn3	420	3.96667	0.995427
MosOpn3	421	4	0.995999
MosOpn3	422	4.03333	0.995999
MosOpn3	423	4.06667	0.995999
MosOpn3	424	4.1	0.993713
MosOpn3	425	4.13333	0.995999
MosOpn3	426	4.16667	0.995427
MosOpn3	427	4.2	0.995999
MosOpn3	428	4.23333	0.995999
MosOpn3	429	4.26667	0.995999
MosOpn3	430	4.3	0.993141
MosOpn3	431	4.33333	0.993141
MosOpn3	432	4.36667	0.990569
MosOpn3	433	4.4	0.993141
MosOpn3	434	4.43333	0.995999
MosOpn3	435	4.46667	0.995999
MosOpn3	436	4.5	0.993713
MosOpn3	437	4.53333	0.993141
MosOpn3	438	4.56667	0.995999
MosOpn3	439	4.6	0.99457
MosOpn3	440	4.63333	0.997428
MosOpn3	441	4.66667	0.99457
MosOpn3	442	4.7	0.99457
MosOpn3	443	4.73333	0.99457
MosOpn3	444	4.76667	0.995142
MosOpn3	445	4.8	0.99457
MosOpn3	446	4.83333	0.996856
MosOpn3	447	4.86667	0.99457
MosOpn3	448	4.9	0.996856
MosOpn3	449	4.93333	0.997428
MosOpn3	450	4.96667	0.997428
MosOpn3	451	5	0.99457
MosOpn3	452	5.03333	0.992284
MosOpn3	453	5.06667	0.998285
MosOpn3	454	5.1	0.998285
MosOpn3	455	5.13333	0.993713
MosOpn3	456	5.16667	0.995999
MosOpn3	457	5.2	0.998285
MosOpn3	458	5.23333	0.995999
MosOpn3	459	5.26667	0.998285
MosOpn3	460	5.3	0.995427
MosOpn3	461	5.33333	0.993713
MosOpn3	462	5.36667	0.993141
MosOpn3	463	5.4	0.997714
MosOpn3	464	5.43333	0.997714
MosOpn3	465	5.46667	0.995427
MosOpn3	466	5.5	0.995999
MosOpn3	467	5.53333	0.995427
MosOpn3	468	5.56667	0.995427
MosOpn3	469	5.6	0.992569
MosOpn3	470	5.63333	0.997714
MosOpn3	471	5.66667	0.995427
MosOpn3	472	5.7	0.993141
MosOpn3	473	5.73333	0.995427
MosOpn3	474	5.76667	0.995427
MosOpn3	475	5.8	0.995142
MosOpn3	476	5.83333	0.995427
MosOpn3	477	5.86667	0.995427
MosOpn3	478	5.9	0.995427
MosOpn3	479	5.93333	0.995427
MosOpn3	480	5.96667	0.995427
MosOpn3	481	6	0.995427
MosOpn3	482	6.03333	0.993141
MosOpn3	483	6.06667	0.993141
MosOpn3	484	6.1	0.997714
MosOpn3	485	6.13333	0.997142
MosOpn3	486	6.16667	1
MosOpn3	487	6.2	0.997714
MosOpn3	488	6.23333	0.995142
MosOpn3	489	6.26667	0.995427
MosOpn3	490	6.3	0.995427
MosOpn3	491	6.33333	0.995427
MosOpn3	492	6.36667	0.995427
MosOpn3	493	6.4	0.995427
MosOpn3	494	6.43333	0.989997
MosOpn3	495	6.46667	0.993713
MosOpn3	496	6.5	0.99457
MosOpn3	497	6.53333	0.997714
MosOpn3	498	6.56667	0.992569
MosOpn3	499	6.6	0.993141
MosOpn3	500	6.63333	0.992569
MosOpn3	501	6.66667	0.995427
MosOpn3	502	6.7	0.995999
MosOpn3	503	6.73333	0.995427
MosOpn3	504	6.76667	0.993141
MosOpn3	505	6.8	0.993141
MosOpn3	506	6.83333	0.993141
MosOpn3	507	6.86667	0.997714
MosOpn3	508	6.9	0.995427
MosOpn3	509	6.93333	0.995999
MosOpn3	510	6.96667	0.995427
MosOpn3	511	7	0.995427
MosOpn3	512	7.03333	0.995427
MosOpn3	513	7.06667	0.997142
MosOpn3	514	7.1	0.997142
MosOpn3	515	7.13333	0.992284
MosOpn3	516	7.16667	0.99457
MosOpn3	517	7.2	0.99457
MosOpn3	518	7.23333	0.99457
MosOpn3	519	7.26667	0.992569
MosOpn3	520	7.3	0.995427
MosOpn3	521	7.33333	0.995427
MosOpn3	522	7.36667	0.992569
MosOpn3	523	7.4	0.992569
MosOpn3	524	7.43333	0.994856
MosOpn3	525	7.46667	0.996285
MosOpn3	526	7.5	0.994856
MosOpn3	527	7.53333	0.992569
MosOpn3	528	7.56667	0.993141
MosOpn3	529	7.6	0.992569
MosOpn3	530	7.63333	0.992569
MosOpn3	531	7.66667	0.992569
MosOpn3	532	7.7	0.993141
MosOpn3	533	7.73333	0.993141
MosOpn3	534	7.76667	0.993713
MosOpn3	535	7.8	0.993141
MosOpn3	536	7.83333	0.995427
MosOpn3	537	7.86667	0.995999
MosOpn3	538	7.9	0.997714
MosOpn3	539	7.93333	0.997714
MosOpn3	540	7.96667	0.995427
MosOpn3	541	8	0.995427
MosOpn3	542	8.03333	0.993141
MosOpn3	543	8.06667	0.993141
MosOpn3	544	8.1	0.993141
MosOpn3	545	8.13333	0.995427
MosOpn3	546	8.16667	0.995427
MosOpn3	547	8.2	0.997714
MosOpn3	548	8.23333	0.995427
MosOpn3	549	8.26667	0.993141
MosOpn3	550	8.3	0.993141
MosOpn3	551	8.33333	0.995427
MosOpn3	552	8.36667	0.995427
MosOpn3	553	8.4	0.996081
MosOpn3	554	8.43333	0.996081
MosOpn3	555	8.46667	0.992569
MosOpn3	556	8.5	0.991712
MosOpn3	557	8.53333	0.992284
MosOpn3	558	8.56667	0.992284
MosOpn3	559	8.6	0.995427
MosOpn3	560	8.63333	0.994856
MosOpn3	561	8.66667	0.994856
MosOpn3	562	8.7	0.990283
MosOpn3	563	8.73333	0.992569
MosOpn3	564	8.76667	0.992569
MosOpn3	565	8.8	0.991712
MosOpn3	566	8.83333	0.991712
MosOpn3	567	8.86667	0.991712
MosOpn3	568	8.9	0.987139
MosOpn3	569	8.93333	0.989426
MosOpn3	570	8.96667	0.991712
MosOpn3	571	9	0.992284
MosOpn3	572	9.03333	0.992284
MosOpn3	573	9.06667	0.993141
MosOpn3	574	9.1	0.992569
MosOpn3	575	9.13333	0.992569
MosOpn3	576	9.16667	0.992569
MosOpn3	577	9.2	0.992569
MosOpn3	578	9.23333	0.992569
MosOpn3	579	9.26667	0.992569
MosOpn3	580	9.3	0.992569
MosOpn3	581	9.33333	0.992569
MosOpn3	582	9.36667	0.992569
MosOpn3	583	9.4	0.993998
MosOpn3	584	9.43333	0.99457
MosOpn3	585	9.46667	0.99457
MosOpn3	586	9.5	0.99457
MosOpn3	587	9.53333	0.993998
MosOpn3	588	9.56667	0.996285
MosOpn3	589	9.6	0.996285
MosOpn3	590	9.63333	0.996285
MosOpn3	591	9.66667	0.993998
MosOpn3	592	9.7	0.993998
MosOpn3	593	9.73333	0.999224
MosOpn3	594	9.76667	0.996285
MosOpn3	595	9.8	0.989997
MosOpn3	596	9.83333	0.988282
MosOpn3	597	9.86667	0.987711
MosOpn3	598	9.9	0.998571
MosOpn3	599	9.93333	0.998367
MosOpn3	600	9.96667	1.00065
MosOpn3	601	10	0.997714
MosOpn3	602	10.0333	0.994652
MosOpn3	603	10.0667	1.00294
MosOpn3	604	10.1	0.994856
MosOpn3	605	10.1333	0.993998
MosOpn3	606	10.1667	0.989997
MosOpn3	607	10.2	0.989426
MosOpn3	608	10.2333	0.990283
MosOpn3	609	10.2667	1.00171
MosOpn3	610	10.3	1.00343
MosOpn3	611	10.3333	0.988568
MosOpn3	612	10.3667	0.98571
MosOpn3	613	10.4	0.985139
MosOpn3	614	10.4333	0.982281
MosOpn3	615	10.4667	0.990569
MosOpn3	616	10.5	0.995142
MosOpn3	617	10.5333	0.999796
MosOpn3	618	10.5667	1.006
MosOpn3	619	10.6	1.01123
MosOpn3	620	10.6333	1.00751
MosOpn3	621	10.6667	1.00743
MosOpn3	622	10.7	1.00731
MosOpn3	623	10.7333	0.999714
MosOpn3	624	10.7667	1.00457
MosOpn3	625	10.8	1.00751
MosOpn3	626	10.8333	1.00739
MosOpn3	627	10.8667	1.01494
MosOpn3	628	10.9	1.0098
MosOpn3	629	10.9333	1.00894
MosOpn3	630	10.9667	1.00494
MosOpn3	631	11	1.00265
MosOpn3	632	11.0333	1.0158
MosOpn3	633	11.0667	1.01351
MosOpn3	634	11.1	1.01343
MosOpn3	635	11.1333	1.01711
MosOpn3	636	11.1667	1.002
MosOpn3	637	11.2	1.00886
MosOpn3	638	11.2333	1.00425
MosOpn3	639	11.2667	1.0098
MosOpn3	640	11.3	1.00968
MosOpn3	641	11.3333	1.00739
MosOpn3	642	11.3667	1
MosOpn3	643	11.4	1.00686
MosOpn3	644	11.4333	0.999428
MosOpn3	645	11.4667	1.00204
MosOpn3	646	11.5	1.00143
MosOpn3	647	11.5333	1.00751
MosOpn3	648	11.5667	1.006
MosOpn3	649	11.6	1.00682
MosOpn3	650	11.6333	1.00457
MosOpn3	651	11.6667	1.00596
MosOpn3	652	11.7	1.00372
MosOpn3	653	11.7333	0.999959
MosOpn3	654	11.7667	0.999102
MosOpn3	655	11.8	0.999102
MosOpn3	656	11.8333	0.996815
MosOpn3	657	11.8667	0.996856
MosOpn3	658	11.9	0.997101
MosOpn3	659	11.9333	1.00171
MosOpn3	660	11.9667	0.99951
MosOpn3	661	12	0.997224
MosOpn3	662	12.0333	1.00572
MosOpn3	663	12.0667	1.00637
MosOpn3	664	12.1	1.00408
MosOpn3	665	12.1333	1.00637
MosOpn3	666	12.1667	1.00853
MosOpn3	667	12.2	1.00171
MosOpn3	668	12.2333	1.00171
MosOpn3	669	12.2667	1.00629
MosOpn3	670	12.3	1.00629
MosOpn3	671	12.3333	1.01029
MosOpn3	672	12.3667	1.01572
MosOpn3	673	12.4	1.00968
MosOpn3	674	12.4333	1.00625
MosOpn3	675	12.4667	1.00568
MosOpn3	676	12.5	1.00568
MosOpn3	677	12.5333	1.01323
MosOpn3	678	12.5667	1.01323
MosOpn3	679	12.6	1.01323
MosOpn3	680	12.6333	1.00853
MosOpn3	681	12.6667	1.00853
MosOpn3	682	12.7	1.00625
MosOpn3	683	12.7333	1.00167
MosOpn3	684	12.7667	1.00167
MosOpn3	685	12.8	1.00339
MosOpn3	686	12.8333	1.00572
MosOpn3	687	12.8667	1.00486
MosOpn3	688	12.9	1.00543
MosOpn3	689	12.9333	1.00768
MosOpn3	690	12.9667	1.00629
MosOpn3	691	13	1.00857
MosOpn3	692	13.0333	1.01029
MosOpn3	693	13.0667	1.01258
MosOpn3	694	13.1	1.00943
MosOpn3	695	13.1333	1.00343
MosOpn3	696	13.1667	1.00343
MosOpn3	697	13.2	1.00339
MosOpn3	698	13.2333	1.00796
MosOpn3	699	13.2667	1.008
MosOpn3	700	13.3	1.01196
MosOpn3	701	13.3333	1.01229
MosOpn3	702	13.3667	1.00257
MosOpn3	703	13.4	1.00114
MosOpn3	704	13.4333	1.00396
MosOpn3	705	13.4667	1.00625
MosOpn3	706	13.5	1.00853
MosOpn3	707	13.5333	1.01082
MosOpn3	708	13.5667	1.01082
MosOpn3	709	13.6	1.01082
MosOpn3	710	13.6333	1.00866
MosOpn3	711	13.6667	1.00866
MosOpn3	712	13.7	1.00866
MosOpn3	713	13.7333	1.00866
MosOpn3	714	13.7667	1.00866
MosOpn3	715	13.8	1.0058
MosOpn3	716	13.8333	1.00637
MosOpn3	717	13.8667	0.99457
MosOpn3	718	13.9	0.996856
MosOpn3	719	13.9333	0.987139
MosOpn3	720	13.9667	0.980852
MosOpn3	721	14	0.978565
MosOpn3	722	14.0333	0.984853
MosOpn3	723	14.0667	0.984853
MosOpn3	724	14.1	0.992569
MosOpn3	725	14.1333	0.997795
MosOpn3	726	14.1667	1.00008
MosOpn3	727	14.2	0.997795
MosOpn3	728	14.2333	1.00167
MosOpn3	729	14.2667	1.00453
MosOpn3	730	14.3	1.00139
MosOpn3	731	14.3333	1.00237
MosOpn3	732	14.3667	1.00237
MosOpn3	733	14.4	1.00694
MosOpn3	734	14.4333	1.00465
MosOpn3	735	14.4667	1.00237
MosOpn3	736	14.5	1.00225
MosOpn3	737	14.5333	1.00008
MosOpn3	738	14.5667	0.997224
MosOpn3	739	14.6	0.991794
MosOpn3	740	14.6333	0.991794
MosOpn3	741	14.6667	0.99408
MosOpn3	742	14.7	0.99951
MosOpn3	743	14.7333	1.00094
MosOpn3	744	14.7667	0.99951
MosOpn3	745	14.8	0.996652
MosOpn3	746	14.8333	0.998939
MosOpn3	747	14.8667	0.997224
MosOpn3	748	14.9	0.992651
MosOpn3	749	14.9333	0.992651
MosOpn3	750	14.9667	0.997224
MosOpn3	751	15	0.99951
MosOpn3	752	15.0333	0.996366
MosOpn3	753	15.0667	0.994366
MosOpn3	754	15.1	0.996652
MosOpn3	755	15.1333	0.998939
MosOpn3	756	15.1667	1.0018
MosOpn3	757	15.2	1.00323
MosOpn3	758	15.2333	0.998081
MosOpn3	759	15.2667	1.00122
MosOpn3	760	15.3	0.998939
MosOpn3	761	15.3333	0.998939
MosOpn3	762	15.3667	1.00122
MosOpn3	763	15.4	0.998939
MosOpn3	764	15.4333	0.998939
MosOpn3	765	15.4667	0.996652
MosOpn3	766	15.5	0.996652
MosOpn3	767	15.5333	0.993508
MosOpn3	768	15.5667	0.993508
MosOpn3	769	15.6	0.995795
MosOpn3	770	15.6333	0.996652
MosOpn3	771	15.6667	0.998939
MosOpn3	772	15.7	0.998939
MosOpn3	773	15.7333	1.00351
MosOpn3	774	15.7667	0.996652
MosOpn3	775	15.8	0.994366
MosOpn3	776	15.8333	0.993508
MosOpn3	777	15.8667	0.991794
MosOpn3	778	15.9	0.991794
MosOpn3	779	15.9333	0.993508
MosOpn3	780	15.9667	0.998939
MosOpn3	781	16	0.998939
MosOpn3	782	16.0333	0.99408
MosOpn3	783	16.0667	0.991222
MosOpn3	784	16.1	0.993508
MosOpn3	785	16.1333	0.996652
MosOpn3	786	16.1667	0.998939
MosOpn3	787	16.2	0.998939
MosOpn3	788	16.2333	0.99065
MosOpn3	789	16.2667	0.998081
MosOpn3	790	16.3	0.99408
MosOpn3	791	16.3333	0.991712
MosOpn3	792	16.3667	0.982567
MosOpn3	793	16.4	0.959703
MosOpn3	794	16.4333	0.943412
MosOpn3	795	16.4667	0.958274
MosOpn3	796	16.5	0.975789
MosOpn3	797	16.5333	0.982362
MosOpn3	798	16.5667	0.978076
MosOpn3	799	16.6	0.990365
MosOpn3	800	16.6333	0.98322
MosOpn3	801	16.6667	0.985792
MosOpn3	802	16.7	0.970645
MosOpn3	803	16.7333	0.979504
MosOpn3	804	16.7667	1.00053
MosOpn3	805	16.8	1.00351
MosOpn3	806	16.8333	1.01952
MosOpn3	807	16.8667	1.02695
MosOpn3	808	16.9	1.02352
MosOpn3	809	16.9333	1.02066
MosOpn3	810	16.9667	1.02094
MosOpn3	811	17	1.00429
MosOpn3	812	17.0333	1.00318
MosOpn3	813	17.0667	1.00033
MosOpn3	814	17.1	0.993386
MosOpn3	815	17.1333	0.993386
MosOpn3	816	17.1667	0.9911
MosOpn3	817	17.2	0.986527
MosOpn3	818	17.2333	0.985955
MosOpn3	819	17.2667	0.989221
MosOpn3	820	17.3	0.989221
MosOpn3	821	17.3333	0.987425
MosOpn3	822	17.3667	0.985424
MosOpn3	823	17.4	0.976565
MosOpn3	824	17.4333	0.973135
MosOpn3	825	17.4667	0.973993
MosOpn3	826	17.5	0.973421
MosOpn3	827	17.5333	0.968277
MosOpn3	828	17.5667	0.974564
MosOpn3	829	17.6	0.979668
MosOpn3	830	17.6333	0.98424
MosOpn3	831	17.6667	0.985669
MosOpn3	832	17.7	0.986527
MosOpn3	833	17.7333	0.9911
MosOpn3	834	17.7667	0.985955
MosOpn3	835	17.8	0.980566
MosOpn3	836	17.8333	0.982934
MosOpn3	837	17.8667	0.985792
MosOpn3	838	17.9	0.985669
MosOpn3	839	17.9333	0.985792
MosOpn3	840	17.9667	0.986364
MosOpn3	841	18	0.986364
MosOpn3	842	18.0333	0.986364
MosOpn3	843	18.0667	0.990365
MosOpn3	844	18.1	0.990365
MosOpn3	845	18.1333	0.990365
MosOpn3	846	18.1667	0.985792
MosOpn3	847	18.2	0.990365
MosOpn3	848	18.2333	0.985792
MosOpn3	849	18.2667	0.985792
MosOpn3	850	18.3	0.988078
MosOpn3	851	18.3333	0.981138
MosOpn3	852	18.3667	0.981138
MosOpn3	853	18.4	0.976565
MosOpn3	854	18.4333	0.980566
MosOpn3	855	18.4667	0.975422
MosOpn3	856	18.5	0.97485
MosOpn3	857	18.5333	0.979423
MosOpn3	858	18.5667	0.983995
MosOpn3	859	18.6	0.988568
MosOpn3	860	18.6333	0.991385
MosOpn3	861	18.6667	0.993672
MosOpn3	862	18.7	0.989099
MosOpn3	863	18.7333	0.995917
MosOpn3	864	18.7667	0.991345
MosOpn3	865	18.8	0.994325
MosOpn3	866	18.8333	0.988527
MosOpn3	867	18.8667	0.988527
MosOpn3	868	18.9	0.990242
MosOpn3	869	18.9333	0.990242
MosOpn3	870	18.9667	0.990242
MosOpn3	871	19	0.992529
MosOpn3	872	19.0333	0.985669
MosOpn3	873	19.0667	0.985669
MosOpn3	874	19.1	0.985669
MosOpn3	875	19.1333	0.985098
MosOpn3	876	19.1667	0.982281
MosOpn3	877	19.2	0.983383
MosOpn3	878	19.2333	0.982811
MosOpn3	879	19.2667	0.975993
MosOpn3	880	19.3	0.983424
MosOpn3	881	19.3333	0.97485
MosOpn3	882	19.3667	0.977994
MosOpn3	883	19.4	0.968848
MosOpn3	884	19.4333	0.970277
MosOpn3	885	19.4667	0.971135
MosOpn3	886	19.5	0.989956
MosOpn3	887	19.5333	0.989956
MosOpn3	888	19.5667	0.991385
MosOpn3	889	19.6	0.988568
MosOpn3	890	19.6333	0.986282
MosOpn3	891	19.6667	0.987098
MosOpn3	892	19.7	0.987098
MosOpn3	893	19.7333	0.981995
MosOpn3	894	19.7667	0.984853
MosOpn3	895	19.8	0.9931
MosOpn3	896	19.8333	0.9931
MosOpn3	897	19.8667	0.994284
MosOpn3	898	19.9	0.991998
MosOpn3	899	19.9333	0.992569
MosOpn3	900	19.9667	0.991998
MosOpn3	901	20	0.991998
MosOpn3	902	20.0333	0.989711
MosOpn3	903	20.0667	0.990283
MosOpn3	904	20.1	0.992529
MosOpn3	905	20.1333	0.994815
MosOpn3	906	20.1667	0.980566
MosOpn3	907	20.2	0.984567
MosOpn3	908	20.2333	0.981709
MosOpn3	909	20.2667	0.971992
MosOpn3	910	20.3	0.973993
MosOpn3	911	20.3333	0.973421
MosOpn3	912	20.3667	0.98028
MosOpn3	913	20.4	0.992937
MosOpn3	914	20.4333	0.987139
PufTMT	1	-10	0.97532
PufTMT	2	-9.96667	0.975899
PufTMT	3	-9.93333	0.975347
PufTMT	4	-9.9	0.975899
PufTMT	5	-9.86667	0.97532
PufTMT	6	-9.83333	0.962941
PufTMT	7	-9.8	0.969616
PufTMT	8	-9.76667	0.980472
PufTMT	9	-9.73333	1.01643
PufTMT	10	-9.7	1.02292
PufTMT	11	-9.66667	1.01982
PufTMT	12	-9.63333	1.00902
PufTMT	13	-9.6	0.984204
PufTMT	14	-9.56667	0.974006
PufTMT	15	-9.53333	1.00292
PufTMT	16	-9.5	1.02673
PufTMT	17	-9.46667	1.02944
PufTMT	18	-9.43333	1.0169
PufTMT	19	-9.4	1.0031
PufTMT	20	-9.36667	0.995953
PufTMT	21	-9.33333	0.974269
PufTMT	22	-9.3	1.01196
PufTMT	23	-9.26667	1.02776
PufTMT	24	-9.23333	1.02618
PufTMT	25	-9.2	1.02137
PufTMT	26	-9.16667	1.00213
PufTMT	27	-9.13333	0.979841
PufTMT	28	-9.1	0.973349
PufTMT	29	-9.06667	0.994665
PufTMT	30	-9.03333	1.02118
PufTMT	31	-9	1.01916
PufTMT	32	-8.96667	1.01243
PufTMT	33	-8.93333	0.995742
PufTMT	34	-8.9	0.985466
PufTMT	35	-8.86667	0.978553
PufTMT	36	-8.83333	1.01546
PufTMT	37	-8.8	1.025
PufTMT	38	-8.76667	1.01803
PufTMT	39	-8.73333	1.02539
PufTMT	40	-8.7	1.00305
PufTMT	41	-8.66667	0.987647
PufTMT	42	-8.63333	0.982443
PufTMT	43	-8.6	0.990407
PufTMT	44	-8.56667	1.03748
PufTMT	45	-8.53333	1.0358
PufTMT	46	-8.5	1.03149
PufTMT	47	-8.46667	1.00242
PufTMT	48	-8.43333	0.986938
PufTMT	49	-8.4	0.978054
PufTMT	50	-8.36667	0.995269
PufTMT	51	-8.33333	1.0112
PufTMT	52	-8.3	1.00668
PufTMT	53	-8.26667	1.00357
PufTMT	54	-8.23333	0.99427
PufTMT	55	-8.2	0.983599
PufTMT	56	-8.16667	0.979683
PufTMT	57	-8.13333	1.00744
PufTMT	58	-8.1	1.0327
PufTMT	59	-8.06667	1.03222
PufTMT	60	-8.03333	1.02944
PufTMT	61	-8	1.0092
PufTMT	62	-7.96667	0.989382
PufTMT	63	-7.93333	0.982969
PufTMT	64	-7.9	0.992089
PufTMT	65	-7.86667	1.02791
PufTMT	66	-7.83333	1.02699
PufTMT	67	-7.8	1.02849
PufTMT	68	-7.76667	1.00875
PufTMT	69	-7.73333	0.998712
PufTMT	70	-7.7	0.978028
PufTMT	71	-7.66667	0.997766
PufTMT	72	-7.63333	1.02744
PufTMT	73	-7.6	1.02476
PufTMT	74	-7.56667	1.02773
PufTMT	75	-7.53333	0.999895
PufTMT	76	-7.5	0.991222
PufTMT	77	-7.46667	0.98352
PufTMT	78	-7.43333	0.984861
PufTMT	79	-7.4	1.0266
PufTMT	80	-7.36667	1.02016
PufTMT	81	-7.33333	1.0195
PufTMT	82	-7.3	0.994928
PufTMT	83	-7.26667	0.992063
PufTMT	84	-7.23333	0.982285
PufTMT	85	-7.2	1.00055
PufTMT	86	-7.16667	1.02846
PufTMT	87	-7.13333	1.02247
PufTMT	88	-7.1	1.01561
PufTMT	89	-7.06667	0.993508
PufTMT	90	-7.03333	0.977738
PufTMT	91	-7	0.971036
PufTMT	92	-6.96667	0.984809
PufTMT	93	-6.93333	1.01777
PufTMT	94	-6.9	1.01267
PufTMT	95	-6.86667	1.01425
PufTMT	96	-6.83333	0.993298
PufTMT	97	-6.8	0.990249
PufTMT	98	-6.76667	0.981181
PufTMT	99	-6.73333	0.991327
PufTMT	100	-6.7	1.03338
PufTMT	101	-6.66667	1.03004
PufTMT	102	-6.63333	1.01438
PufTMT	103	-6.6	1.0005
PufTMT	104	-6.56667	0.985755
PufTMT	105	-6.53333	0.981207
PufTMT	106	-6.5	1.00063
PufTMT	107	-6.46667	1.03083
PufTMT	108	-6.43333	1.02765
PufTMT	109	-6.4	1.02907
PufTMT	110	-6.36667	1.0051
PufTMT	111	-6.33333	0.987095
PufTMT	112	-6.3	0.985413
PufTMT	113	-6.26667	0.982416
PufTMT	114	-6.23333	1.02384
PufTMT	115	-6.2	1.0148
PufTMT	116	-6.16667	1.0175
PufTMT	117	-6.13333	1.00032
PufTMT	118	-6.1	0.99703
PufTMT	119	-6.06667	0.979473
PufTMT	120	-6.03333	0.997977
PufTMT	121	-6	1.0353
PufTMT	122	-5.96667	1.02733
PufTMT	123	-5.93333	1.03165
PufTMT	124	-5.9	0.998607
PufTMT	125	-5.86667	0.992878
PufTMT	126	-5.83333	0.984572
PufTMT	127	-5.8	0.986201
PufTMT	128	-5.76667	1.02657
PufTMT	129	-5.73333	1.03062
PufTMT	130	-5.7	1.03299
PufTMT	131	-5.66667	1.00954
PufTMT	132	-5.63333	0.991616
PufTMT	133	-5.6	0.978185
PufTMT	134	-5.56667	0.987621
PufTMT	135	-5.53333	1.02339
PufTMT	136	-5.5	1.024
PufTMT	137	-5.46667	1.02484
PufTMT	138	-5.43333	0.997162
PufTMT	139	-5.4	0.991958
PufTMT	140	-5.36667	0.976634
PufTMT	141	-5.33333	0.988147
PufTMT	142	-5.3	1.02563
PufTMT	143	-5.26667	1.01561
PufTMT	144	-5.23333	1.01969
PufTMT	145	-5.2	1.00899
PufTMT	146	-5.16667	0.9831
PufTMT	147	-5.13333	0.979
PufTMT	148	-5.1	0.986701
PufTMT	149	-5.06667	1.01877
PufTMT	150	-5.03333	1.01396
PufTMT	151	-5	1.01874
PufTMT	152	-4.96667	1.00047
PufTMT	153	-4.93333	0.992246
PufTMT	154	-4.9	0.976371
PufTMT	155	-4.86667	0.98812
PufTMT	156	-4.83333	1.02804
PufTMT	157	-4.8	1.02878
PufTMT	158	-4.76667	1.0251
PufTMT	159	-4.73333	1.01254
PufTMT	160	-4.7	0.984283
PufTMT	161	-4.66667	0.977134
PufTMT	162	-4.63333	0.981339
PufTMT	163	-4.6	1.01401
PufTMT	164	-4.56667	1.02497
PufTMT	165	-4.53333	1.02476
PufTMT	166	-4.5	1.00058
PufTMT	167	-4.46667	0.995348
PufTMT	168	-4.43333	0.983153
PufTMT	169	-4.4	0.979158
PufTMT	170	-4.36667	1.01898
PufTMT	171	-4.33333	1.01553
PufTMT	172	-4.3	1.01156
PufTMT	173	-4.26667	0.99385
PufTMT	174	-4.23333	0.989066
PufTMT	175	-4.2	0.977922
PufTMT	176	-4.16667	0.977475
PufTMT	177	-4.13333	1.01015
PufTMT	178	-4.1	1.01758
PufTMT	179	-4.06667	1.02739
PufTMT	180	-4.03333	1.0133
PufTMT	181	-4	0.99519
PufTMT	182	-3.96667	0.981996
PufTMT	183	-3.93333	0.986281
PufTMT	184	-3.9	1.0287
PufTMT	185	-3.86667	1.02492
PufTMT	186	-3.83333	1.02413
PufTMT	187	-3.8	1.00279
PufTMT	188	-3.76667	0.990617
PufTMT	189	-3.73333	0.978237
PufTMT	190	-3.7	0.978106
PufTMT	191	-3.66667	1.02684
PufTMT	192	-3.63333	1.0199
PufTMT	193	-3.6	1.01908
PufTMT	194	-3.56667	1.00915
PufTMT	195	-3.53333	0.991563
PufTMT	196	-3.5	0.977528
PufTMT	197	-3.46667	0.981339
PufTMT	198	-3.43333	1.01777
PufTMT	199	-3.4	1.02715
PufTMT	200	-3.36667	1.01942
PufTMT	201	-3.33333	1.00649
PufTMT	202	-3.3	0.994034
PufTMT	203	-3.26667	0.978448
PufTMT	204	-3.23333	0.98904
PufTMT	205	-3.2	1.02797
PufTMT	206	-3.16667	1.02552
PufTMT	207	-3.13333	1.02224
PufTMT	208	-3.1	1.0134
PufTMT	209	-3.06667	0.994665
PufTMT	210	-3.03333	0.979263
PufTMT	211	-3	0.982732
PufTMT	212	-2.96667	1.01588
PufTMT	213	-2.93333	1.02413
PufTMT	214	-2.9	1.02263
PufTMT	215	-2.86667	1.01091
PufTMT	216	-2.83333	0.992194
PufTMT	217	-2.8	0.972797
PufTMT	218	-2.76667	0.976293
PufTMT	219	-2.73333	1.0318
PufTMT	220	-2.7	1.02644
PufTMT	221	-2.66667	1.02607
PufTMT	222	-2.63333	1.00647
PufTMT	223	-2.6	0.985807
PufTMT	224	-2.56667	0.980314
PufTMT	225	-2.53333	0.981996
PufTMT	226	-2.5	1.00699
PufTMT	227	-2.46667	1.02105
PufTMT	228	-2.43333	1.02271
PufTMT	229	-2.4	1.01104
PufTMT	230	-2.36667	0.996505
PufTMT	231	-2.33333	0.973139
PufTMT	232	-2.3	0.980682
PufTMT	233	-2.26667	1.01359
PufTMT	234	-2.23333	1.02723
PufTMT	235	-2.2	1.02118
PufTMT	236	-2.16667	1.00618
PufTMT	237	-2.13333	0.98883
PufTMT	238	-2.1	0.980892
PufTMT	239	-2.06667	0.982259
PufTMT	240	-2.03333	1.01885
PufTMT	241	-2	1.02281
PufTMT	242	-1.96667	1.01409
PufTMT	243	-1.93333	1.01427
PufTMT	244	-1.9	0.986832
PufTMT	245	-1.86667	0.987332
PufTMT	246	-1.83333	0.983337
PufTMT	247	-1.8	1.0117
PufTMT	248	-1.76667	1.0262
PufTMT	249	-1.73333	1.02555
PufTMT	250	-1.7	1.00975
PufTMT	251	-1.66667	0.998423
PufTMT	252	-1.63333	0.978106
PufTMT	253	-1.6	0.988041
PufTMT	254	-1.56667	1.02626
PufTMT	255	-1.53333	1.03096
PufTMT	256	-1.5	1.02581
PufTMT	257	-1.46667	1.02111
PufTMT	258	-1.43333	0.996058
PufTMT	259	-1.4	0.98452
PufTMT	260	-1.36667	0.982732
PufTMT	261	-1.33333	0.999816
PufTMT	262	-1.3	1.02066
PufTMT	263	-1.26667	1.02231
PufTMT	264	-1.23333	1.01101
PufTMT	265	-1.2	0.995401
PufTMT	266	-1.16667	0.978211
PufTMT	267	-1.13333	0.980341
PufTMT	268	-1.1	1.01488
PufTMT	269	-1.06667	1.02087
PufTMT	270	-1.03333	1.02011
PufTMT	271	-1	1.00152
PufTMT	272	-0.966667	0.992562
PufTMT	273	-0.933333	0.982627
PufTMT	274	-0.9	0.973112
PufTMT	275	-0.866667	0.993929
PufTMT	276	-0.833333	1.00778
PufTMT	277	-0.8	1.00723
PufTMT	278	-0.766667	1.00089
PufTMT	279	-0.733333	0.98423
PufTMT	280	-0.7	0.968303
PufTMT	281	-0.666667	0.974058
PufTMT	282	-0.633333	1.01511
PufTMT	283	-0.6	1.02991
PufTMT	284	-0.566667	1.02689
PufTMT	285	-0.533333	1.00846
PufTMT	286	-0.5	0.991274
PufTMT	287	-0.466667	0.980761
PufTMT	288	-0.433333	0.980261
PufTMT	289	-0.4	1.0231
PufTMT	290	-0.366667	1.02581
PufTMT	291	-0.333333	1.02218
PufTMT	292	-0.3	1.0158
PufTMT	293	-0.266667	0.993219
PufTMT	294	-0.233333	0.975819
PufTMT	295	-0.2	0.981418
PufTMT	296	-0.166667	1.00938
PufTMT	297	-0.133333	1.02518
PufTMT	298	-0.1	1.02736
PufTMT	299	-0.0666667	1.00881
PufTMT	300	-0.0333333	0.995663
PufTMT	301	0	0.992089
PufTMT	302	0.0333333	0.984625
PufTMT	303	0.0666667	1.02058
PufTMT	304	0.1	1.02429
PufTMT	305	0.133333	1.02076
PufTMT	306	0.166667	1.01937
PufTMT	307	0.2	0.991484
PufTMT	308	0.233333	0.984046
PufTMT	309	0.266667	0.977765
PufTMT	310	0.3	1.00394
PufTMT	311	0.333333	1.02521
PufTMT	312	0.366667	1.01672
PufTMT	313	0.4	1.01275
PufTMT	314	0.433333	1.00047
PufTMT	315	0.466667	0.98218
PufTMT	316	0.5	0.987121
PufTMT	317	0.533333	1.01706
PufTMT	318	0.566667	1.03745
PufTMT	319	0.6	1.03225
PufTMT	320	0.633333	1.01043
PufTMT	321	0.666667	0.999842
PufTMT	322	0.7	0.990223
PufTMT	323	0.733333	0.977765
PufTMT	324	0.766667	0.980524
PufTMT	325	0.8	0.975084
PufTMT	326	0.833333	0.990249
PufTMT	327	0.866667	0.990617
PufTMT	328	0.9	0.992063
PufTMT	329	0.933333	0.996951
PufTMT	330	0.966667	1.00436
PufTMT	331	1	1.00016
PufTMT	332	1.03333	0.999553
PufTMT	333	1.06667	1.00223
PufTMT	334	1.1	1.00089
PufTMT	335	1.13333	0.996347
PufTMT	336	1.16667	0.996478
PufTMT	337	1.2	0.996031
PufTMT	338	1.23333	0.99887
PufTMT	339	1.26667	0.999238
PufTMT	340	1.3	1
PufTMT	341	1.33333	1
PufTMT	342	1.36667	0.998108
PufTMT	343	1.4	1.00273
PufTMT	344	1.43333	1.00515
PufTMT	345	1.46667	1.00767
PufTMT	346	1.5	1.00499
PufTMT	347	1.53333	0.999395
PufTMT	348	1.56667	0.998923
PufTMT	349	1.6	1.00195
PufTMT	350	1.63333	0.999291
PufTMT	351	1.66667	0.999159
PufTMT	352	1.7	1.004
PufTMT	353	1.73333	1.00142
PufTMT	354	1.76667	1.00357
PufTMT	355	1.8	1.00484
PufTMT	356	1.83333	1.00515
PufTMT	357	1.86667	1.00221
PufTMT	358	1.9	1.00347
PufTMT	359	1.93333	1.00641
PufTMT	360	1.96667	1.00431
PufTMT	361	2	1.00155
PufTMT	362	2.03333	1.00733
PufTMT	363	2.06667	1.0047
PufTMT	364	2.1	1.00258
PufTMT	365	2.13333	1.00237
PufTMT	366	2.16667	1.0041
PufTMT	367	2.2	1.00426
PufTMT	368	2.23333	1.00426
PufTMT	369	2.26667	1.00426
PufTMT	370	2.3	1.00216
PufTMT	371	2.33333	1.00465
PufTMT	372	2.36667	1.00507
PufTMT	373	2.4	1.00507
PufTMT	374	2.43333	1.00197
PufTMT	375	2.46667	1.00239
PufTMT	376	2.5	1.00407
PufTMT	377	2.53333	1.00276
PufTMT	378	2.56667	1.00129
PufTMT	379	2.6	1.00381
PufTMT	380	2.63333	1.00239
PufTMT	381	2.66667	1.00428
PufTMT	382	2.7	1.00618
PufTMT	383	2.73333	1.00492
PufTMT	384	2.76667	1.00786
PufTMT	385	2.8	1.00689
PufTMT	386	2.83333	1.00457
PufTMT	387	2.86667	1.00055
PufTMT	388	2.9	1.00339
PufTMT	389	2.93333	1.00255
PufTMT	390	2.96667	1.00591
PufTMT	391	3	1.00363
PufTMT	392	3.03333	1.00586
PufTMT	393	3.06667	1.00865
PufTMT	394	3.1	1.00444
PufTMT	395	3.13333	1.00439
PufTMT	396	3.16667	1.00991
PufTMT	397	3.2	1.00886
PufTMT	398	3.23333	1.01267
PufTMT	399	3.26667	1.01093
PufTMT	400	3.3	1.01057
PufTMT	401	3.33333	1.01256
PufTMT	402	3.36667	1.01117
PufTMT	403	3.4	1.00967
PufTMT	404	3.43333	1.00707
PufTMT	405	3.46667	1.00552
PufTMT	406	3.5	1.00665
PufTMT	407	3.53333	1.00765
PufTMT	408	3.56667	1.00636
PufTMT	409	3.6	1.00804
PufTMT	410	3.63333	1.00846
PufTMT	411	3.66667	1.00697
PufTMT	412	3.7	1.0113
PufTMT	413	3.73333	1.01325
PufTMT	414	3.76667	1.01396
PufTMT	415	3.8	1.01427
PufTMT	416	3.83333	1.01185
PufTMT	417	3.86667	1.01435
PufTMT	418	3.9	1.00783
PufTMT	419	3.93333	1.00909
PufTMT	420	3.96667	1.01453
PufTMT	421	4	1.0179
PufTMT	422	4.03333	1.01453
PufTMT	423	4.06667	1.01453
PufTMT	424	4.1	1.01117
PufTMT	425	4.13333	1.0149
PufTMT	426	4.16667	1.01564
PufTMT	427	4.2	1.01312
PufTMT	428	4.23333	1.01772
PufTMT	429	4.26667	1.01674
PufTMT	430	4.3	1.01199
PufTMT	431	4.33333	1.01354
PufTMT	432	4.36667	1.01522
PufTMT	433	4.4	1.01351
PufTMT	434	4.43333	1.01398
PufTMT	435	4.46667	1.01398
PufTMT	436	4.5	1.01314
PufTMT	437	4.53333	1.01314
PufTMT	438	4.56667	1.01259
PufTMT	439	4.6	1.01086
PufTMT	440	4.63333	1.01151
PufTMT	441	4.66667	1.01425
PufTMT	442	4.7	1.01046
PufTMT	443	4.73333	1.00799
PufTMT	444	4.76667	1.00799
PufTMT	445	4.8	1.00652
PufTMT	446	4.83333	1.00652
PufTMT	447	4.86667	1.0092
PufTMT	448	4.9	1.0139
PufTMT	449	4.93333	1.0143
PufTMT	450	4.96667	1.01406
PufTMT	451	5	1.01795
PufTMT	452	5.03333	1.0168
PufTMT	453	5.06667	1.01906
PufTMT	454	5.1	1.01674
PufTMT	455	5.13333	1.01682
PufTMT	456	5.16667	1.02
PufTMT	457	5.2	1.02045
PufTMT	458	5.23333	1.0195
PufTMT	459	5.26667	1.01706
PufTMT	460	5.3	1.01795
PufTMT	461	5.33333	1.0168
PufTMT	462	5.36667	1.01806
PufTMT	463	5.4	1.01869
PufTMT	464	5.43333	1.02145
PufTMT	465	5.46667	1.01843
PufTMT	466	5.5	1.01821
PufTMT	467	5.53333	1.0163
PufTMT	468	5.56667	1.0169
PufTMT	469	5.6	1.0169
PufTMT	470	5.63333	1.01658
PufTMT	471	5.66667	1.01732
PufTMT	472	5.7	1.01772
PufTMT	473	5.73333	1.0174
PufTMT	474	5.76667	1.01735
PufTMT	475	5.8	1.01758
PufTMT	476	5.83333	1.01761
PufTMT	477	5.86667	1.01761
PufTMT	478	5.9	1.01882
PufTMT	479	5.93333	1.02168
PufTMT	480	5.96667	1.01769
PufTMT	481	6	1.01837
PufTMT	482	6.03333	1.01906
PufTMT	483	6.06667	1.01911
PufTMT	484	6.1	1.01411
PufTMT	485	6.13333	1.01648
PufTMT	486	6.16667	1.01522
PufTMT	487	6.2	1.01517
PufTMT	488	6.23333	1.01238
PufTMT	489	6.26667	1.01285
PufTMT	490	6.3	1.00867
PufTMT	491	6.33333	1.00904
PufTMT	492	6.36667	1.01041
PufTMT	493	6.4	1.01036
PufTMT	494	6.43333	1.01078
PufTMT	495	6.46667	1.00972
PufTMT	496	6.5	1.01078
PufTMT	497	6.53333	1.01406
PufTMT	498	6.56667	1.01156
PufTMT	499	6.6	1.01114
PufTMT	500	6.63333	1.0092
PufTMT	501	6.66667	1.01149
PufTMT	502	6.7	1.01464
PufTMT	503	6.73333	1.0159
PufTMT	504	6.76667	1.01898
PufTMT	505	6.8	1.01588
PufTMT	506	6.83333	1.01698
PufTMT	507	6.86667	1.01209
PufTMT	508	6.9	1.01611
PufTMT	509	6.93333	1.01564
PufTMT	510	6.96667	1.01522
PufTMT	511	7	1.0159
PufTMT	512	7.03333	1.01898
PufTMT	513	7.06667	1.02163
PufTMT	514	7.1	1.01977
PufTMT	515	7.13333	1.00591
PufTMT	516	7.16667	1.03522
PufTMT	517	7.2	1.0389
PufTMT	518	7.23333	1.03606
PufTMT	519	7.26667	1.00084
PufTMT	520	7.3	1.00531
PufTMT	521	7.33333	0.980735
PufTMT	522	7.36667	0.983783
PufTMT	523	7.4	0.975215
PufTMT	524	7.43333	0.988067
PufTMT	525	7.46667	1.00555
PufTMT	526	7.5	1.02297
PufTMT	527	7.53333	1.05785
PufTMT	528	7.56667	1.06358
PufTMT	529	7.6	1.03338
PufTMT	530	7.63333	1.01448
PufTMT	531	7.66667	1.00796
PufTMT	532	7.7	0.99067
PufTMT	533	7.73333	0.979736
PufTMT	534	7.76667	0.97695
PufTMT	535	7.8	0.990039
PufTMT	536	7.83333	0.995085
PufTMT	537	7.86667	0.997529
PufTMT	538	7.9	1.05385
PufTMT	539	7.93333	1.05096
PufTMT	540	7.96667	1.04071
PufTMT	541	8	1.02444
PufTMT	542	8.03333	0.999658
PufTMT	543	8.06667	0.986938
PufTMT	544	8.1	0.988173
PufTMT	545	8.13333	0.984204
PufTMT	546	8.16667	0.989093
PufTMT	547	8.2	0.994244
PufTMT	548	8.23333	0.996951
PufTMT	549	8.26667	0.997188
PufTMT	550	8.3	0.986149
PufTMT	551	8.33333	1.00318
PufTMT	552	8.36667	1.0502
PufTMT	553	8.4	1.05254
PufTMT	554	8.43333	1.04053
PufTMT	555	8.46667	1.02426
PufTMT	556	8.5	0.996688
PufTMT	557	8.53333	0.988173
PufTMT	558	8.56667	0.975478
PufTMT	559	8.6	0.973218
PufTMT	560	8.63333	0.976556
PufTMT	561	8.66667	0.987673
PufTMT	562	8.7	0.988909
PufTMT	563	8.73333	0.990302
PufTMT	564	8.76667	0.988015
PufTMT	565	8.8	0.985939
PufTMT	566	8.83333	0.996899
PufTMT	567	8.86667	0.997872
PufTMT	568	8.9	0.996715
PufTMT	569	8.93333	1.00686
PufTMT	570	8.96667	1.00591
PufTMT	571	9	1.00389
PufTMT	572	9.03333	1.00497
PufTMT	573	9.06667	1.00221
PufTMT	574	9.1	1.00494
PufTMT	575	9.13333	1.00321
PufTMT	576	9.16667	1.00584
PufTMT	577	9.2	1.00363
PufTMT	578	9.23333	1.00218
PufTMT	579	9.26667	1.00234
PufTMT	580	9.3	1.00518
PufTMT	581	9.33333	1.00266
PufTMT	582	9.36667	0.99887
PufTMT	583	9.4	1.0021
PufTMT	584	9.43333	1.00126
PufTMT	585	9.46667	1.00042
PufTMT	586	9.5	0.999475
PufTMT	587	9.53333	1.00074
PufTMT	588	9.56667	1.00654
PufTMT	589	9.6	1.00568
PufTMT	590	9.63333	1.00552
PufTMT	591	9.66667	1.0051
PufTMT	592	9.7	1.00478
PufTMT	593	9.73333	1.00526
PufTMT	594	9.76667	1.00231
PufTMT	595	9.8	1.00231
PufTMT	596	9.83333	1.00599
PufTMT	597	9.86667	1.004
PufTMT	598	9.9	1.00867
PufTMT	599	9.93333	1.01036
PufTMT	600	9.96667	1.00718
PufTMT	601	10	1.00686
PufTMT	602	10.0333	1.0107
PufTMT	603	10.0667	1.00649
PufTMT	604	10.1	1.00944
PufTMT	605	10.1333	1.00534
PufTMT	606	10.1667	1.00749
PufTMT	607	10.2	1.01128
PufTMT	608	10.2333	1.00965
PufTMT	609	10.2667	1.01001
PufTMT	610	10.3	1.0164
PufTMT	611	10.3333	1.01566
PufTMT	612	10.3667	1.01377
PufTMT	613	10.4	1.00978
PufTMT	614	10.4333	1.0112
PufTMT	615	10.4667	1.00994
PufTMT	616	10.5	1.0118
PufTMT	617	10.5333	1.0118
PufTMT	618	10.5667	1.0102
PufTMT	619	10.6	1.00936
PufTMT	620	10.6333	1.00783
PufTMT	621	10.6667	1.00891
PufTMT	622	10.7	1.01049
PufTMT	623	10.7333	1.00967
PufTMT	624	10.7667	1.01015
PufTMT	625	10.8	1.01503
PufTMT	626	10.8333	1.01251
PufTMT	627	10.8667	1.01509
PufTMT	628	10.9	1.01348
PufTMT	629	10.9333	1.01172
PufTMT	630	10.9667	1.00881
PufTMT	631	11	1.01543
PufTMT	632	11.0333	1.01614
PufTMT	633	11.0667	1.01735
PufTMT	634	11.1	1.01488
PufTMT	635	11.1333	1.01824
PufTMT	636	11.1667	1.02358
PufTMT	637	11.2	1.02147
PufTMT	638	11.2333	1.01906
PufTMT	639	11.2667	1.02032
PufTMT	640	11.3	1.01354
PufTMT	641	11.3333	1.01522
PufTMT	642	11.3667	1.01588
PufTMT	643	11.4	1.01819
PufTMT	644	11.4333	1.02321
PufTMT	645	11.4667	1.01806
PufTMT	646	11.5	1.01908
PufTMT	647	11.5333	1.01309
PufTMT	648	11.5667	1.01645
PufTMT	649	11.6	1.02
PufTMT	650	11.6333	1.02092
PufTMT	651	11.6667	1.02113
PufTMT	652	11.7	1.02071
PufTMT	653	11.7333	1.01756
PufTMT	654	11.7667	1.01903
PufTMT	655	11.8	1.01677
PufTMT	656	11.8333	1.01506
PufTMT	657	11.8667	1.02092
PufTMT	658	11.9	1.0204
PufTMT	659	11.9333	1.01806
PufTMT	660	11.9667	1.02016
PufTMT	661	12	1.02576
PufTMT	662	12.0333	1.02016
PufTMT	663	12.0667	1.01214
PufTMT	664	12.1	1.01256
PufTMT	665	12.1333	1.01779
PufTMT	666	12.1667	1.01737
PufTMT	667	12.2	1.019
PufTMT	668	12.2333	1.02026
PufTMT	669	12.2667	1.0169
PufTMT	670	12.3	1.02928
PufTMT	671	12.3333	1.02
PufTMT	672	12.3667	0.973638
PufTMT	673	12.4	0.97829
PufTMT	674	12.4333	0.976529
PufTMT	675	12.4667	0.965674
PufTMT	676	12.5	0.982679
PufTMT	677	12.5333	0.990091
PufTMT	678	12.5667	0.993009
PufTMT	679	12.6	0.997214
PufTMT	680	12.6333	1.0087
PufTMT	681	12.6667	1.00576
PufTMT	682	12.7	0.999658
PufTMT	683	12.7333	1.00279
PufTMT	684	12.7667	1.04395
PufTMT	685	12.8	1.06726
PufTMT	686	12.8333	1.0322
PufTMT	687	12.8667	1.01669
PufTMT	688	12.9	1.00975
PufTMT	689	12.9333	0.998213
PufTMT	690	12.9667	0.986543
PufTMT	691	13	0.982496
PufTMT	692	13.0333	0.98741
PufTMT	693	13.0667	0.985282
PufTMT	694	13.1	0.99406
PufTMT	695	13.1333	1.04363
PufTMT	696	13.1667	1.05772
PufTMT	697	13.2	1.04594
PufTMT	698	13.2333	1.02405
PufTMT	699	13.2667	1.01086
PufTMT	700	13.3	0.987621
PufTMT	701	13.3333	0.978711
PufTMT	702	13.3667	0.989329
PufTMT	703	13.4	0.977975
PufTMT	704	13.4333	0.985544
PufTMT	705	13.4667	1.01948
PufTMT	706	13.5	1.05217
PufTMT	707	13.5333	1.04303
PufTMT	708	13.5667	1.02736
PufTMT	709	13.6	1.01367
PufTMT	710	13.6333	1.0118
PufTMT	711	13.6667	0.988514
PufTMT	712	13.7	0.983311
PufTMT	713	13.7333	0.989802
PufTMT	714	13.7667	0.982653
PufTMT	715	13.8	0.985992
PufTMT	716	13.8333	1.01877
PufTMT	717	13.8667	1.06158
PufTMT	718	13.9	1.05627
PufTMT	719	13.9333	1.04736
PufTMT	720	13.9667	1.01932
PufTMT	721	14	0.995296
PufTMT	722	14.0333	0.992326
PufTMT	723	14.0667	0.981944
PufTMT	724	14.1	0.977371
PufTMT	725	14.1333	0.980656
PufTMT	726	14.1667	0.980288
PufTMT	727	14.2	0.984914
PufTMT	728	14.2333	0.999159
PufTMT	729	14.2667	1.0276
PufTMT	730	14.3	1.05701
PufTMT	731	14.3333	1.05251
PufTMT	732	14.3667	1.01461
PufTMT	733	14.4	0.991537
PufTMT	734	14.4333	0.984388
PufTMT	735	14.4667	0.975767
PufTMT	736	14.5	0.975347
PufTMT	737	14.5333	0.970248
PufTMT	738	14.5667	0.975005
PufTMT	739	14.6	0.983757
PufTMT	740	14.6333	1.01611
PufTMT	741	14.6667	1.05052
PufTMT	742	14.7	1.03998
PufTMT	743	14.7333	1.00849
PufTMT	744	14.7667	0.994428
PufTMT	745	14.8	0.992562
PufTMT	746	14.8333	0.984625
PufTMT	747	14.8667	0.97787
PufTMT	748	14.9	0.977239
PufTMT	749	14.9333	0.979762
PufTMT	750	14.9667	0.988278
PufTMT	751	15	0.997083
PufTMT	752	15.0333	1.01304
PufTMT	753	15.0667	1.06174
PufTMT	754	15.1	1.06773
PufTMT	755	15.1333	1.05727
PufTMT	756	15.1667	1.01779
PufTMT	757	15.2	1.00113
PufTMT	758	15.2333	0.984467
PufTMT	759	15.2667	0.990275
PufTMT	760	15.3	0.979499
PufTMT	761	15.3333	0.990748
PufTMT	762	15.3667	0.988041
PufTMT	763	15.4	0.988777
PufTMT	764	15.4333	0.987069
PufTMT	765	15.4667	0.992667
PufTMT	766	15.5	0.991432
PufTMT	767	15.5333	0.988593
PufTMT	768	15.5667	0.988672
PufTMT	769	15.6	0.990591
PufTMT	770	15.6333	0.993377
PufTMT	771	15.6667	0.985334
PufTMT	772	15.7	0.98996
PufTMT	773	15.7333	0.989198
PufTMT	774	15.7667	1.00005
PufTMT	775	15.8	1.0016
PufTMT	776	15.8333	1.0041
PufTMT	777	15.8667	0.999738
PufTMT	778	15.9	0.999658
PufTMT	779	15.9333	1.00134
PufTMT	780	15.9667	1.00547
PufTMT	781	16	1.00584
PufTMT	782	16.0333	1.00573
PufTMT	783	16.0667	1.00457
PufTMT	784	16.1	1.00923
PufTMT	785	16.1333	1.00573
PufTMT	786	16.1667	1.0061
PufTMT	787	16.2	1.00184
PufTMT	788	16.2333	1.0052
PufTMT	789	16.2667	1.00478
PufTMT	790	16.3	1.00208
PufTMT	791	16.3333	1.00208
PufTMT	792	16.3667	1.00452
PufTMT	793	16.4	1.00547
PufTMT	794	16.4333	1.00352
PufTMT	795	16.4667	1.00147
PufTMT	796	16.5	0.99979
PufTMT	797	16.5333	1.00315
PufTMT	798	16.5667	1.00476
PufTMT	799	16.6	1.0077
PufTMT	800	16.6333	1.00775
PufTMT	801	16.6667	1.0076
PufTMT	802	16.7	1.00807
PufTMT	803	16.7333	1.00775
PufTMT	804	16.7667	1.00607
PufTMT	805	16.8	1.0107
PufTMT	806	16.8333	1.00902
PufTMT	807	16.8667	1.01164
PufTMT	808	16.9	1.01459
PufTMT	809	16.9333	1.01249
PufTMT	810	16.9667	1.01354
PufTMT	811	17	1.01401
PufTMT	812	17.0333	1.01795
PufTMT	813	17.0667	1.02047
PufTMT	814	17.1	1.02047
PufTMT	815	17.1333	1.02047
PufTMT	816	17.1667	1.02053
PufTMT	817	17.2	1.01961
PufTMT	818	17.2333	1.01958
PufTMT	819	17.2667	1.0168
PufTMT	820	17.3	1.01879
PufTMT	821	17.3333	1.01375
PufTMT	822	17.3667	1.01269
PufTMT	823	17.4	1.00902
PufTMT	824	17.4333	1.00975
PufTMT	825	17.4667	1.0139
PufTMT	826	17.5	1.01432
PufTMT	827	17.5333	1.01538
PufTMT	828	17.5667	1.018
PufTMT	829	17.6	1.01779
PufTMT	830	17.6333	1.01601
PufTMT	831	17.6667	1.01601
PufTMT	832	17.7	1.02116
PufTMT	833	17.7333	1.0199
PufTMT	834	17.7667	1.02095
PufTMT	835	17.8	1.02111
PufTMT	836	17.8333	1.018
PufTMT	837	17.8667	1.02865
PufTMT	838	17.9	1.01772
PufTMT	839	17.9333	0.979683
PufTMT	840	17.9667	0.985571
PufTMT	841	18	0.98084
PufTMT	842	18.0333	0.966489
PufTMT	843	18.0667	0.975084
PufTMT	844	18.1	0.994665
PufTMT	845	18.1333	0.999369
PufTMT	846	18.1667	1.00689
PufTMT	847	18.2	1.0076
PufTMT	848	18.2333	1.01674
PufTMT	849	18.2667	1.00838
PufTMT	850	18.3	1.06395
PufTMT	851	18.3333	1.07162
PufTMT	852	18.3667	1.0614
PufTMT	853	18.4	1.03367
PufTMT	854	18.4333	1.00991
PufTMT	855	18.4667	1.00071
PufTMT	856	18.5	1.00053
PufTMT	857	18.5333	0.993955
PufTMT	858	18.5667	0.987779
PufTMT	859	18.6	1.00623
PufTMT	860	18.6333	1.02384
PufTMT	861	18.6667	1.07438
PufTMT	862	18.7	1.0763
PufTMT	863	18.7333	1.05393
PufTMT	864	18.7667	1.03283
PufTMT	865	18.8	1.00733
PufTMT	866	18.8333	1.00239
PufTMT	867	18.8667	1.00289
PufTMT	868	18.9	0.993141
PufTMT	869	18.9333	0.989908
PufTMT	870	18.9667	0.986386
PufTMT	871	19	0.992904
PufTMT	872	19.0333	0.995821
PufTMT	873	19.0667	1.00773
PufTMT	874	19.1	1.0052
PufTMT	875	19.1333	1.00605
PufTMT	876	19.1667	1.00313
PufTMT	877	19.2	1.00339
PufTMT	878	19.2333	1.00807
PufTMT	879	19.2667	1.00865
PufTMT	880	19.3	1.00744
PufTMT	881	19.3333	1.01038
PufTMT	882	19.3667	1.00712
PufTMT	883	19.4	1.00523
PufTMT	884	19.4333	1.00689
PufTMT	885	19.4667	1.00702
PufTMT	886	19.5	1.01101
PufTMT	887	19.5333	1.00765
PufTMT	888	19.5667	1.00915
PufTMT	889	19.6	1.0128
PufTMT	890	19.6333	1.01301
PufTMT	891	19.6667	1.00917
PufTMT	892	19.7	1.00923
PufTMT	893	19.7333	1.00712
PufTMT	894	19.7667	1.00712
PufTMT	895	19.8	1.00881
PufTMT	896	19.8333	1.01091
PufTMT	897	19.8667	1.00607
PufTMT	898	19.9	1.00649
PufTMT	899	19.9333	1.01259
PufTMT	900	19.9667	1.02471
PufTMT	901	20	1.0159
PufTMT	902	20.0333	0.984651
PufTMT	903	20.0667	0.988488
PufTMT	904	20.1	0.986018
PufTMT	905	20.1333	0.968986
PufTMT	906	20.1667	0.98218
PufTMT	907	20.2	0.993298
PufTMT	908	20.2333	1.00486
PufTMT	909	20.2667	1.00068
PufTMT	910	20.3	0.998186
PufTMT	911	20.3333	0.999553
PufTMT	912	20.3667	0.999028
PufTMT	913	20.4	1.00623
PufTMT	914	20.4333	1.0501
LamPP	1	-10	0.96243
LamPP	2	-9.96667	0.964836
LamPP	3	-9.93333	0.963429
LamPP	4	-9.9	0.964836
LamPP	5	-9.86667	0.962874
LamPP	6	-9.83333	0.963059
LamPP	7	-9.8	0.964466
LamPP	8	-9.76667	0.949882
LamPP	9	-9.73333	0.955989
LamPP	10	-9.7	0.973867
LamPP	11	-9.66667	0.984009
LamPP	12	-9.63333	0.982011
LamPP	13	-9.6	0.980308
LamPP	14	-9.56667	0.973349
LamPP	15	-9.53333	0.975718
LamPP	16	-9.5	1.00596
LamPP	17	-9.46667	1.00011
LamPP	18	-9.43333	0.997594
LamPP	19	-9.4	0.986601
LamPP	20	-9.36667	0.969499
LamPP	21	-9.33333	0.972312
LamPP	22	-9.3	0.980974
LamPP	23	-9.26667	1.00903
LamPP	24	-9.23333	1.01503
LamPP	25	-9.2	0.991079
LamPP	26	-9.16667	0.975126
LamPP	27	-9.13333	0.968759
LamPP	28	-9.1	0.961801
LamPP	29	-9.06667	1.00592
LamPP	30	-9.03333	1.00703
LamPP	31	-9	0.987489
LamPP	32	-8.96667	0.975274
LamPP	33	-8.93333	0.978827
LamPP	34	-8.9	0.967722
LamPP	35	-8.86667	1.005
LamPP	36	-8.83333	1.00914
LamPP	37	-8.8	1.01107
LamPP	38	-8.76667	0.979049
LamPP	39	-8.73333	0.97557
LamPP	40	-8.7	0.970092
LamPP	41	-8.66667	0.969055
LamPP	42	-8.63333	1.01688
LamPP	43	-8.6	1.0131
LamPP	44	-8.56667	0.987044
LamPP	45	-8.53333	0.982085
LamPP	46	-8.5	0.97631
LamPP	47	-8.46667	0.969204
LamPP	48	-8.43333	0.977273
LamPP	49	-8.4	1.0121
LamPP	50	-8.36667	1.00355
LamPP	51	-8.33333	0.976828
LamPP	52	-8.3	0.970536
LamPP	53	-8.26667	0.966686
LamPP	54	-8.23333	0.982825
LamPP	55	-8.2	1.00681
LamPP	56	-8.16667	1.0171
LamPP	57	-8.13333	0.991524
LamPP	58	-8.1	0.983417
LamPP	59	-8.06667	0.973201
LamPP	60	-8.03333	0.969351
LamPP	61	-8	1.00385
LamPP	62	-7.96667	1.02084
LamPP	63	-7.93333	1.00933
LamPP	64	-7.9	0.974756
LamPP	65	-7.86667	0.973497
LamPP	66	-7.83333	0.965206
LamPP	67	-7.8	0.979346
LamPP	68	-7.76667	1.00589
LamPP	69	-7.73333	1.00589
LamPP	70	-7.7	0.982603
LamPP	71	-7.66667	0.981937
LamPP	72	-7.63333	0.973793
LamPP	73	-7.6	0.971572
LamPP	74	-7.56667	1.00485
LamPP	75	-7.53333	1.00973
LamPP	76	-7.5	0.990339
LamPP	77	-7.46667	0.975866
LamPP	78	-7.43333	0.978235
LamPP	79	-7.4	0.972164
LamPP	80	-7.36667	1.01299
LamPP	81	-7.33333	1.01555
LamPP	82	-7.3	1.02617
LamPP	83	-7.26667	0.996669
LamPP	84	-7.23333	0.977199
LamPP	85	-7.2	0.973793
LamPP	86	-7.16667	0.976014
LamPP	87	-7.13333	1.01618
LamPP	88	-7.1	1.02336
LamPP	89	-7.06667	0.988821
LamPP	90	-7.03333	0.973497
LamPP	91	-7	0.973497
LamPP	92	-6.96667	0.97098
LamPP	93	-6.93333	1.00607
LamPP	94	-6.9	1.01595
LamPP	95	-6.86667	1.01729
LamPP	96	-6.83333	0.968019
LamPP	97	-6.8	0.974977
LamPP	98	-6.76667	0.974534
LamPP	99	-6.73333	0.972461
LamPP	100	-6.7	1.01854
LamPP	101	-6.66667	1.02069
LamPP	102	-6.63333	0.986453
LamPP	103	-6.6	0.977791
LamPP	104	-6.56667	0.969351
LamPP	105	-6.53333	0.965206
LamPP	106	-6.5	1.00592
LamPP	107	-6.46667	1.01695
LamPP	108	-6.43333	1.00126
LamPP	109	-6.4	0.971498
LamPP	110	-6.36667	0.971276
LamPP	111	-6.33333	0.97483
LamPP	112	-6.3	0.983417
LamPP	113	-6.26667	1.00814
LamPP	114	-6.23333	1.01725
LamPP	115	-6.2	0.983084
LamPP	116	-6.16667	0.972461
LamPP	117	-6.13333	0.974089
LamPP	118	-6.1	0.973201
LamPP	119	-6.06667	0.992041
LamPP	120	-6.03333	1.01299
LamPP	121	-6	0.995669
LamPP	122	-5.96667	0.979272
LamPP	123	-5.93333	0.977199
LamPP	124	-5.9	0.972461
LamPP	125	-5.86667	0.994115
LamPP	126	-5.83333	1.01273
LamPP	127	-5.8	1.01817
LamPP	128	-5.76667	0.996706
LamPP	129	-5.73333	0.977199
LamPP	130	-5.7	0.972905
LamPP	131	-5.66667	0.967427
LamPP	132	-5.63333	1.0084
LamPP	133	-5.6	1.01103
LamPP	134	-5.56667	0.981604
LamPP	135	-5.53333	0.975274
LamPP	136	-5.5	0.97705
LamPP	137	-5.46667	0.970684
LamPP	138	-5.43333	0.99937
LamPP	139	-5.4	1.0087
LamPP	140	-5.36667	1.01699
LamPP	141	-5.33333	0.980974
LamPP	142	-5.3	0.979864
LamPP	143	-5.26667	0.969204
LamPP	144	-5.23333	0.97557
LamPP	145	-5.2	1.01688
LamPP	146	-5.16667	1.02184
LamPP	147	-5.13333	0.986749
LamPP	148	-5.1	0.979864
LamPP	149	-5.06667	0.974237
LamPP	150	-5.03333	0.976754
LamPP	151	-5	1.00948
LamPP	152	-4.96667	1.02099
LamPP	153	-4.93333	1.00911
LamPP	154	-4.9	0.988969
LamPP	155	-4.86667	0.97705
LamPP	156	-4.83333	0.967427
LamPP	157	-4.8	0.977791
LamPP	158	-4.76667	1.00785
LamPP	159	-4.73333	1.01814
LamPP	160	-4.7	0.995781
LamPP	161	-4.66667	0.980752
LamPP	162	-4.63333	0.976607
LamPP	163	-4.6	0.966834
LamPP	164	-4.56667	1.01347
LamPP	165	-4.53333	1.01566
LamPP	166	-4.5	1.00707
LamPP	167	-4.46667	0.982455
LamPP	168	-4.43333	0.978383
LamPP	169	-4.4	0.969944
LamPP	170	-4.36667	0.985564
LamPP	171	-4.33333	1.01303
[truncated: 743 more rows]

## Sheet: C
Line	Time (ms)	X	Y
MosOpn3	500	-9.5	1.08108
MosOpn3	600	-9.4	0.810811
MosOpn3	700	-9.3	1.08108
MosOpn3	800	-9.2	1.08108
MosOpn3	900	-9.1	0.810811
MosOpn3	1000	-9	1.08108
MosOpn3	1100	-8.9	0.810811
MosOpn3	1200	-8.8	1.08108
MosOpn3	1300	-8.7	1.08108
MosOpn3	1400	-8.6	0.810811
MosOpn3	1500	-8.5	1.08108
MosOpn3	1600	-8.4	1.08108
MosOpn3	1700	-8.3	0.810811
MosOpn3	1800	-8.2	1.08108
MosOpn3	1900	-8.1	1.08108
MosOpn3	2000	-8	0.810811
MosOpn3	2100	-7.9	1.08108
MosOpn3	2200	-7.8	0.810811
MosOpn3	2300	-7.7	1.08108
MosOpn3	2400	-7.6	1.08108
MosOpn3	2500	-7.5	0.810811
MosOpn3	2600	-7.4	1.08108
MosOpn3	2700	-7.3	1.08108
MosOpn3	2800	-7.2	0.810811
MosOpn3	2900	-7.1	1.08108
MosOpn3	3000	-7	1.08108
MosOpn3	3100	-6.9	0.810811
MosOpn3	3200	-6.8	1.08108
MosOpn3	3300	-6.7	0.810811
MosOpn3	3400	-6.6	1.08108
MosOpn3	3500	-6.5	1.08108
MosOpn3	3600	-6.4	0.810811
MosOpn3	3700	-6.3	1.08108
MosOpn3	3800	-6.2	1.08108
MosOpn3	3900	-6.1	0.810811
MosOpn3	4000	-6	1.08108
MosOpn3	4100	-5.9	1.08108
MosOpn3	4200	-5.8	0.810811
MosOpn3	4300	-5.7	1.08108
MosOpn3	4400	-5.6	0.810811
MosOpn3	4500	-5.5	0.810811
MosOpn3	4600	-5.4	1.08108
MosOpn3	4700	-5.3	0.810811
MosOpn3	4800	-5.2	1.08108
MosOpn3	4900	-5.1	1.08108
MosOpn3	5000	-5	0.810811
MosOpn3	5100	-4.9	1.08108
MosOpn3	5200	-4.8	1.08108
MosOpn3	5300	-4.7	0.810811
MosOpn3	5400	-4.6	1.08108
MosOpn3	5500	-4.5	1.08108
MosOpn3	5600	-4.4	1.08108
MosOpn3	5700	-4.3	1.08108
MosOpn3	5800	-4.2	0.810811
MosOpn3	5900	-4.1	1.08108
MosOpn3	6000	-4	1.08108
MosOpn3	6100	-3.9	0.810811
MosOpn3	6200	-3.8	1.08108
MosOpn3	6300	-3.7	1.08108
MosOpn3	6400	-3.6	0.810811
MosOpn3	6500	-3.5	1.08108
MosOpn3	6600	-3.4	0.810811
MosOpn3	6700	-3.3	0.810811
MosOpn3	6800	-3.2	1.08108
MosOpn3	6900	-3.1	0.810811
MosOpn3	7000	-3	0.810811
MosOpn3	7100	-2.9	1.08108
MosOpn3	7200	-2.8	0.810811
MosOpn3	7300	-2.7	0.810811
MosOpn3	7400	-2.6	1.08108
MosOpn3	7500	-2.5	0.810811
MosOpn3	7600	-2.4	1.08108
MosOpn3	7700	-2.3	1.08108
MosOpn3	7800	-2.2	0.810811
MosOpn3	7900	-2.1	1.08108
MosOpn3	8000	-2	1.08108
MosOpn3	8100	-1.9	0.810811
MosOpn3	8200	-1.8	1.08108
MosOpn3	8300	-1.7	1.08108
MosOpn3	8400	-1.6	0.810811
MosOpn3	8500	-1.5	1.08108
MosOpn3	8600	-1.4	0.810811
MosOpn3	8700	-1.3	0.810811
MosOpn3	8800	-1.2	1.08108
MosOpn3	8900	-1.1	0.810811
MosOpn3	9000	-1	1.08108
MosOpn3	9100	-0.9	1.08108
MosOpn3	9200	-0.8	0.810811
MosOpn3	9300	-0.7	1.08108
MosOpn3	9400	-0.6	1.08108
MosOpn3	9500	-0.5	0.810811
MosOpn3	9600	-0.4	1.08108
MosOpn3	9700	-0.3	1.08108
MosOpn3	9800	-0.2	0.810811
MosOpn3	9900	-0.1	0.810811
MosOpn3	10000	0	0.540541
MosOpn3	10100	0.1	0.540541
MosOpn3	10200	0.2	0.540541
MosOpn3	10300	0.3	0.27027
MosOpn3	10400	0.4	0.27027
MosOpn3	10500	0.5	0.27027
MosOpn3	10600	0.6	0
MosOpn3	10700	0.7	0
MosOpn3	10800	0.8	0
MosOpn3	10900	0.9	0
MosOpn3	11000	1	0
MosOpn3	11100	1.1	0
MosOpn3	11200	1.2	0
MosOpn3	11300	1.3	0
MosOpn3	11400	1.4	0
MosOpn3	11500	1.5	0
MosOpn3	11600	1.6	0
MosOpn3	11700	1.7	0
MosOpn3	11800	1.8	0
MosOpn3	11900	1.9	0
MosOpn3	12000	2	0
MosOpn3	12100	2.1	0
MosOpn3	12200	2.2	0
MosOpn3	12300	2.3	0
MosOpn3	12400	2.4	0
MosOpn3	12500	2.5	0
MosOpn3	12600	2.6	0
MosOpn3	12700	2.7	0
MosOpn3	12800	2.8	0
MosOpn3	12900	2.9	0
MosOpn3	13000	3	0.27027
MosOpn3	13100	3.1	0.27027
MosOpn3	13200	3.2	0.27027
MosOpn3	13300	3.3	0.27027
MosOpn3	13400	3.4	0.27027
MosOpn3	13500	3.5	0.27027
MosOpn3	13600	3.6	0.27027
MosOpn3	13700	3.7	0.27027
MosOpn3	13800	3.8	0.27027
MosOpn3	13900	3.9	0.27027
MosOpn3	14000	4	0
MosOpn3	14100	4.1	0
MosOpn3	14200	4.2	0
MosOpn3	14300	4.3	0
MosOpn3	14400	4.4	0
MosOpn3	14500	4.5	0
MosOpn3	14600	4.6	0
MosOpn3	14700	4.7	0
MosOpn3	14800	4.8	0
MosOpn3	14900	4.9	0
MosOpn3	15000	5	0
MosOpn3	15100	5.1	0
MosOpn3	15200	5.2	0
MosOpn3	15300	5.3	0
MosOpn3	15400	5.4	0
MosOpn3	15500	5.5	0.27027
MosOpn3	15600	5.6	0.27027
MosOpn3	15700	5.7	0.27027
MosOpn3	15800	5.8	0.27027
MosOpn3	15900	5.9	0.27027
MosOpn3	16000	6	0.27027
MosOpn3	16100	6.1	0.27027
MosOpn3	16200	6.2	0.27027
MosOpn3	16300	6.3	0.27027
MosOpn3	16400	6.4	0.27027
MosOpn3	16500	6.5	0
MosOpn3	16600	6.6	0
MosOpn3	16700	6.7	0
MosOpn3	16800	6.8	0
MosOpn3	16900	6.9	0
MosOpn3	17000	7	0
MosOpn3	17100	7.1	0.27027
MosOpn3	17200	7.2	0.27027
MosOpn3	17300	7.3	0.27027
MosOpn3	17400	7.4	0.27027
MosOpn3	17500	7.5	0.27027
MosOpn3	17600	7.6	0.27027
MosOpn3	17700	7.7	0.27027
MosOpn3	17800	7.8	0.27027
MosOpn3	17900	7.9	0.27027
MosOpn3	18000	8	0.27027
MosOpn3	18100	8.1	0
MosOpn3	18200	8.2	0
MosOpn3	18300	8.3	0
MosOpn3	18400	8.4	0
MosOpn3	18500	8.5	0
MosOpn3	18600	8.6	0
MosOpn3	18700	8.7	0
MosOpn3	18800	8.8	0
MosOpn3	18900	8.9	0
MosOpn3	19000	9	0
MosOpn3	19100	9.1	0
MosOpn3	19200	9.2	0
MosOpn3	19300	9.3	0
MosOpn3	19400	9.4	0
MosOpn3	19500	9.5	0
MosOpn3	19600	9.6	0
MosOpn3	19700	9.7	0
MosOpn3	19800	9.8	0.27027
MosOpn3	19900	9.9	0.27027
MosOpn3	20000	10	0.27027
MosOpn3	20100	10.1	0.27027
MosOpn3	20200	10.2	0.27027
MosOpn3	20300	10.3	0.27027
MosOpn3	20400	10.4	0.27027
MosOpn3	20500	10.5	0.27027
MosOpn3	20600	10.6	0.27027
MosOpn3	20700	10.7	0.27027
MosOpn3	20800	10.8	0
MosOpn3	20900	10.9	0
MosOpn3	21000	11	0
MosOpn3	21100	11.1	0
MosOpn3	21200	11.2	0
MosOpn3	21300	11.3	0
MosOpn3	21400	11.4	0
MosOpn3	21500	11.5	0
MosOpn3	21600	11.6	0
MosOpn3	21700	11.7	0
MosOpn3	21800	11.8	0
MosOpn3	21900	11.9	0
MosOpn3	22000	12	0
MosOpn3	22100	12.1	0
MosOpn3	22200	12.2	0.27027
MosOpn3	22300	12.3	0.27027
MosOpn3	22400	12.4	0.27027
MosOpn3	22500	12.5	0.27027
MosOpn3	22600	12.6	0.27027
MosOpn3	22700	12.7	0.27027
MosOpn3	22800	12.8	0.27027
MosOpn3	22900	12.9	0.27027
MosOpn3	23000	13	0.27027
MosOpn3	23100	13.1	0.27027
MosOpn3	23200	13.2	0
MosOpn3	23300	13.3	0
MosOpn3	23400	13.4	0
MosOpn3	23500	13.5	0
MosOpn3	23600	13.6	0
MosOpn3	23700	13.7	0
MosOpn3	23800	13.8	0
MosOpn3	23900	13.9	0
MosOpn3	24000	14	0
MosOpn3	24100	14.1	0
MosOpn3	24200	14.2	0
MosOpn3	24300	14.3	0
MosOpn3	24400	14.4	0
MosOpn3	24500	14.5	0
MosOpn3	24600	14.6	0
MosOpn3	24700	14.7	0
MosOpn3	24800	14.8	0
MosOpn3	24900	14.9	0
MosOpn3	25000	15	0
MosOpn3	25100	15.1	0
MosOpn3	25200	15.2	0
MosOpn3	25300	15.3	0
MosOpn3	25400	15.4	0.27027
MosOpn3	25500	15.5	0.27027
MosOpn3	25600	15.6	0.27027
MosOpn3	25700	15.7	0.27027
MosOpn3	25800	15.8	0.27027
MosOpn3	25900	15.9	0.27027
MosOpn3	26000	16	0.27027
MosOpn3	26100	16.1	0.27027
MosOpn3	26200	16.2	0.27027
MosOpn3	26300	16.3	0.27027
MosOpn3	26400	16.4	0
MosOpn3	26500	16.5	0
MosOpn3	26600	16.6	0
MosOpn3	26700	16.7	0
MosOpn3	26800	16.8	0
MosOpn3	26900	16.9	0.27027
MosOpn3	27000	17	0.27027
MosOpn3	27100	17.1	0.27027
MosOpn3	27200	17.2	0.27027
MosOpn3	27300	17.3	0.27027
MosOpn3	27400	17.4	0.27027
MosOpn3	27500	17.5	0.27027
MosOpn3	27600	17.6	0.27027
MosOpn3	27700	17.7	0.27027
MosOpn3	27800	17.8	0.27027
MosOpn3	27900	17.9	0
MosOpn3	28000	18	0
MosOpn3	28100	18.1	0
MosOpn3	28200	18.2	0
MosOpn3	28300	18.3	0
MosOpn3	28400	18.4	0
MosOpn3	28500	18.5	0
MosOpn3	28600	18.6	0
MosOpn3	28700	18.7	0.27027
MosOpn3	28800	18.8	0.27027
MosOpn3	28900	18.9	0.27027
MosOpn3	29000	19	0.27027
MosOpn3	29100	19.1	0.27027
MosOpn3	29200	19.2	0.27027
MosOpn3	29300	19.3	0.27027
MosOpn3	29400	19.4	0.27027
MosOpn3	29500	19.5	0.27027
MosOpn3	29600	19.6	0.27027
MosOpn3	29700	19.7	0
MosOpn3	29800	19.8	0
MosOpn3	29900	19.9	0
MosOpn3	30000	20	0
MosOpn3	30100	20.1	0
MosOpn3	30200	20.2	0
MosOpn3	30300	20.3	0
MosOpn3	30400	20.4	0
MosOpn3	30500	20.5	0.27027
MosOpn3	30600	20.6	0.27027
MosOpn3	30700	20.7	0.27027
MosOpn3	30800	20.8	0.27027
MosOpn3	30900	20.9	0.27027
MosOpn3	31000	21	0.27027
MosOpn3	31100	21.1	0.27027
MosOpn3	31200	21.2	0.27027
MosOpn3	31300	21.3	0.27027
MosOpn3	31400	21.4	0.27027
MosOpn3	31500	21.5	0
MosOpn3	31600	21.6	0
MosOpn3	31700	21.7	0
MosOpn3	31800	21.8	0
MosOpn3	31900	21.9	0.27027
MosOpn3	32000	22	0.27027
MosOpn3	32100	22.1	0.27027
MosOpn3	32200	22.2	0.27027
MosOpn3	32300	22.3	0.27027
MosOpn3	32400	22.4	0.27027
MosOpn3	32500	22.5	0.27027
MosOpn3	32600	22.6	0.27027
MosOpn3	32700	22.7	0.27027
MosOpn3	32800	22.8	0.27027
MosOpn3	32900	22.9	0
MosOpn3	33000	23	0
MosOpn3	33100	23.1	0
MosOpn3	33200	23.2	0
MosOpn3	33300	23.3	0
MosOpn3	33400	23.4	0
MosOpn3	33500	23.5	0.27027
MosOpn3	33600	23.6	0.27027
MosOpn3	33700	23.7	0.27027
MosOpn3	33800	23.8	0.27027
MosOpn3	33900	23.9	0.27027
MosOpn3	34000	24	0.27027
MosOpn3	34100	24.1	0.27027
MosOpn3	34200	24.2	0.27027
MosOpn3	34300	24.3	0.27027
MosOpn3	34400	24.4	0.27027
MosOpn3	34500	24.5	0
MosOpn3	34600	24.6	0
MosOpn3	34700	24.7	0
MosOpn3	34800	24.8	0
MosOpn3	34900	24.9	0
MosOpn3	35000	25	0
MosOpn3	35100	25.1	0.27027
MosOpn3	35200	25.2	0.27027
MosOpn3	35300	25.3	0.27027
MosOpn3	35400	25.4	0.27027
MosOpn3	35500	25.5	0.27027
MosOpn3	35600	25.6	0.27027
MosOpn3	35700	25.7	0.27027
MosOpn3	35800	25.8	0.27027
MosOpn3	35900	25.9	0.27027
MosOpn3	36000	26	0.27027
MosOpn3	36100	26.1	0
MosOpn3	36200	26.2	0
MosOpn3	36300	26.3	0
MosOpn3	36400	26.4	0
MosOpn3	36500	26.5	0
MosOpn3	36600	26.6	0
MosOpn3	36700	26.7	0.27027
MosOpn3	36800	26.8	0.27027
MosOpn3	36900	26.9	0.27027
MosOpn3	37000	27	0.27027
MosOpn3	37100	27.1	0.27027
MosOpn3	37200	27.2	0.27027
MosOpn3	37300	27.3	0.27027
MosOpn3	37400	27.4	0.27027
MosOpn3	37500	27.5	0.27027
MosOpn3	37600	27.6	0.27027
MosOpn3	37700	27.7	0
MosOpn3	37800	27.8	0
MosOpn3	37900	27.9	0
MosOpn3	38000	28	0
MosOpn3	38100	28.1	0
MosOpn3	38200	28.2	0
MosOpn3	38300	28.3	0
MosOpn3	38400	28.4	0.27027
MosOpn3	38500	28.5	0.27027
MosOpn3	38600	28.6	0.27027
MosOpn3	38700	28.7	0.27027
MosOpn3	38800	28.8	0.27027
MosOpn3	38900	28.9	0.27027
MosOpn3	39000	29	0.27027
MosOpn3	39100	29.1	0.27027
MosOpn3	39200	29.2	0.27027
MosOpn3	39300	29.3	0.27027
MosOpn3	39400	29.4	0
MosOpn3	39500	29.5	0
MosOpn3	39600	29.6	0
MosOpn3	39700	29.7	0
MosOpn3	39800	29.8	0.27027
MosOpn3	39900	29.9	0.27027
MosOpn3	40000	30	0.27027
MosOpn3	40100	30.1	0.27027
MosOpn3	40200	30.2	0.27027
MosOpn3	40300	30.3	0.27027
MosOpn3	40400	30.4	0.27027
MosOpn3	40500	30.5	0.27027
MosOpn3	40600	30.6	0.27027
MosOpn3	40700	30.7	0.27027
MosOpn3	40800	30.8	0
MosOpn3	40900	30.9	0
MosOpn3	41000	31	0
MosOpn3	41100	31.1	0
MosOpn3	41200	31.2	0.27027
MosOpn3	41300	31.3	0.27027
MosOpn3	41400	31.4	0.27027
MosOpn3	41500	31.5	0.27027
MosOpn3	41600	31.6	0.27027
MosOpn3	41700	31.7	0.27027
MosOpn3	41800	31.8	0.27027
MosOpn3	41900	31.9	0.27027
MosOpn3	42000	32	0.27027
MosOpn3	42100	32.1	0.27027
MosOpn3	42200	32.2	0
MosOpn3	42300	32.3	0
MosOpn3	42400	32.4	0
MosOpn3	42500	32.5	0
MosOpn3	42600	32.6	0
MosOpn3	42700	32.7	0.27027
MosOpn3	42800	32.8	0.27027
MosOpn3	42900	32.9	0.27027
MosOpn3	43000	33	0.27027
MosOpn3	43100	33.1	0.27027
MosOpn3	43200	33.2	0.27027
MosOpn3	43300	33.3	0.27027
MosOpn3	43400	33.4	0.27027
MosOpn3	43500	33.5	0.27027
MosOpn3	43600	33.6	0.27027
MosOpn3	43700	33.7	0
MosOpn3	43800	33.8	0
MosOpn3	43900	33.9	0
MosOpn3	44000	34	0
MosOpn3	44100	34.1	0
MosOpn3	44200	34.2	0.27027
MosOpn3	44300	34.3	0.27027
MosOpn3	44400	34.4	0.27027
MosOpn3	44500	34.5	0.27027
MosOpn3	500	-9.5	1.17647
MosOpn3	600	-9.4	0.882353
MosOpn3	700	-9.3	0.882353
MosOpn3	800	-9.2	1.17647
MosOpn3	900	-9.1	1.17647
MosOpn3	1000	-9	0.882353
MosOpn3	1100	-8.9	1.17647
MosOpn3	1200	-8.8	1.17647
MosOpn3	1300	-8.7	0.882353
MosOpn3	1400	-8.6	1.17647
MosOpn3	1500	-8.5	0.882353
MosOpn3	1600	-8.4	0.882353
MosOpn3	1700	-8.3	1.17647
MosOpn3	1800	-8.2	0.882353
MosOpn3	1900	-8.1	0.882353
MosOpn3	2000	-8	1.17647
MosOpn3	2100	-7.9	0.882353
MosOpn3	2200	-7.8	0.882353
MosOpn3	2300	-7.7	1.17647
MosOpn3	2400	-7.6	0.882353
MosOpn3	2500	-7.5	0.882353
MosOpn3	2600	-7.4	1.17647
MosOpn3	2700	-7.3	0.882353
MosOpn3	2800	-7.2	0.882353
MosOpn3	2900	-7.1	1.17647
MosOpn3	3000	-7	0.882353
MosOpn3	3100	-6.9	0.882353
MosOpn3	3200	-6.8	1.17647
MosOpn3	3300	-6.7	0.882353
MosOpn3	3400	-6.6	0.882353
MosOpn3	3500	-6.5	1.17647
MosOpn3	3600	-6.4	0.882353
MosOpn3	3700	-6.3	0.882353
MosOpn3	3800	-6.2	1.17647
MosOpn3	3900	-6.1	0.882353
MosOpn3	4000	-6	0.882353
MosOpn3	4100	-5.9	1.17647
MosOpn3	4200	-5.8	0.882353
MosOpn3	4300	-5.7	0.882353
MosOpn3	4400	-5.6	1.17647
MosOpn3	4500	-5.5	0.882353
MosOpn3	4600	-5.4	0.882353
MosOpn3	4700	-5.3	1.17647
MosOpn3	4800	-5.2	0.882353
MosOpn3	4900	-5.1	0.882353
MosOpn3	5000	-5	1.17647
MosOpn3	5100	-4.9	0.882353
MosOpn3	5200	-4.8	0.882353
MosOpn3	5300	-4.7	1.17647
MosOpn3	5400	-4.6	0.882353
MosOpn3	5500	-4.5	0.882353
MosOpn3	5600	-4.4	1.17647
MosOpn3	5700	-4.3	0.882353
MosOpn3	5800	-4.2	0.882353
MosOpn3	5900	-4.1	1.17647
MosOpn3	6000	-4	0.882353
MosOpn3	6100	-3.9	0.882353
MosOpn3	6200	-3.8	1.17647
MosOpn3	6300	-3.7	0.882353
MosOpn3	6400	-3.6	1.17647
MosOpn3	6500	-3.5	1.17647
MosOpn3	6600	-3.4	0.882353
MosOpn3	6700	-3.3	1.17647
MosOpn3	6800	-3.2	1.17647
MosOpn3	6900	-3.1	0.882353
MosOpn3	7000	-3	1.17647
MosOpn3	7100	-2.9	1.17647
MosOpn3	7200	-2.8	0.882353
MosOpn3	7300	-2.7	1.17647
MosOpn3	7400	-2.6	0.882353
MosOpn3	7500	-2.5	0.882353
MosOpn3	7600	-2.4	1.17647
MosOpn3	7700	-2.3	0.882353
MosOpn3	7800	-2.2	0.882353
MosOpn3	7900	-2.1	1.17647
MosOpn3	8000	-2	0.882353
MosOpn3	8100	-1.9	0.882353
MosOpn3	8200	-1.8	1.17647
MosOpn3	8300	-1.7	0.882353
MosOpn3	8400	-1.6	0.882353
MosOpn3	8500	-1.5	1.17647
MosOpn3	8600	-1.4	0.882353
MosOpn3	8700	-1.3	0.882353
MosOpn3	8800	-1.2	1.17647
MosOpn3	8900	-1.1	0.882353
MosOpn3	9000	-1	0.882353
MosOpn3	9100	-0.9	1.17647
MosOpn3	9200	-0.8	0.882353
MosOpn3	9300	-0.7	0.882353
MosOpn3	9400	-0.6	1.17647
MosOpn3	9500	-0.5	0.882353
MosOpn3	9600	-0.4	0.882353
MosOpn3	9700	-0.3	0.882353
MosOpn3	9800	-0.2	0.588235
MosOpn3	9900	-0.1	0.588235
MosOpn3	10000	0	0.588235
MosOpn3	10100	0.1	0.294118
MosOpn3	10200	0.2	0.294118
MosOpn3	10300	0.3	0.294118
MosOpn3	10400	0.4	0
MosOpn3	10500	0.5	0
MosOpn3	10600	0.6	0
MosOpn3	10700	0.7	0
MosOpn3	10800	0.8	0
MosOpn3	10900	0.9	0
MosOpn3	11000	1	0
MosOpn3	11100	1.1	0
MosOpn3	11200	1.2	0
MosOpn3	11300	1.3	0
MosOpn3	11400	1.4	0
MosOpn3	11500	1.5	0
MosOpn3	11600	1.6	0
MosOpn3	11700	1.7	0
MosOpn3	11800	1.8	0
MosOpn3	11900	1.9	0
MosOpn3	12000	2	0
MosOpn3	12100	2.1	0
MosOpn3	12200	2.2	0
MosOpn3	12300	2.3	0
MosOpn3	12400	2.4	0
MosOpn3	12500	2.5	0
MosOpn3	12600	2.6	0
MosOpn3	12700	2.7	0
MosOpn3	12800	2.8	0
MosOpn3	12900	2.9	0.294118
MosOpn3	13000	3	0.294118
MosOpn3	13100	3.1	0.294118
MosOpn3	13200	3.2	0.294118
MosOpn3	13300	3.3	0.294118
MosOpn3	13400	3.4	0.294118
MosOpn3	13500	3.5	0.294118
MosOpn3	13600	3.6	0.294118
MosOpn3	13700	3.7	0.294118
MosOpn3	13800	3.8	0.294118
MosOpn3	13900	3.9	0
MosOpn3	14000	4	0
MosOpn3	14100	4.1	0
MosOpn3	14200	4.2	0
MosOpn3	14300	4.3	0
MosOpn3	14400	4.4	0
MosOpn3	14500	4.5	0
MosOpn3	14600	4.6	0
MosOpn3	14700	4.7	0
MosOpn3	14800	4.8	0
MosOpn3	14900	4.9	0
MosOpn3	15000	5	0
MosOpn3	15100	5.1	0
MosOpn3	15200	5.2	0
MosOpn3	15300	5.3	0
MosOpn3	15400	5.4	0
MosOpn3	15500	5.5	0
MosOpn3	15600	5.6	0.294118
MosOpn3	15700	5.7	0.294118
MosOpn3	15800	5.8	0.294118
MosOpn3	15900	5.9	0.294118
MosOpn3	16000	6	0.294118
MosOpn3	16100	6.1	0.294118
MosOpn3	16200	6.2	0.294118
MosOpn3	16300	6.3	0.294118
MosOpn3	16400	6.4	0.294118
MosOpn3	16500	6.5	0.294118
MosOpn3	16600	6.6	0
MosOpn3	16700	6.7	0
MosOpn3	16800	6.8	0
MosOpn3	16900	6.9	0
MosOpn3	17000	7	0
MosOpn3	17100	7.1	0
MosOpn3	17200	7.2	0
MosOpn3	17300	7.3	0
MosOpn3	17400	7.4	0
MosOpn3	17500	7.5	0
MosOpn3	17600	7.6	0
MosOpn3	17700	7.7	0
MosOpn3	17800	7.8	0
MosOpn3	17900	7.9	0
MosOpn3	18000	8	0
MosOpn3	18100	8.1	0.294118
MosOpn3	18200	8.2	0.294118
MosOpn3	18300	8.3	0.294118
MosOpn3	18400	8.4	0.294118
MosOpn3	18500	8.5	0.294118
MosOpn3	18600	8.6	0.294118
MosOpn3	18700	8.7	0.294118
MosOpn3	18800	8.8	0.294118
MosOpn3	18900	8.9	0.294118
MosOpn3	19000	9	0.294118
MosOpn3	19100	9.1	0
MosOpn3	19200	9.2	0
MosOpn3	19300	9.3	0
MosOpn3	19400	9.4	0
MosOpn3	19500	9.5	0
MosOpn3	19600	9.6	0
MosOpn3	19700	9.7	0
MosOpn3	19800	9.8	0
MosOpn3	19900	9.9	0.294118
MosOpn3	20000	10	0.294118
MosOpn3	20100	10.1	0.294118
MosOpn3	20200	10.2	0.294118
MosOpn3	20300	10.3	0.294118
MosOpn3	20400	10.4	0.294118
MosOpn3	20500	10.5	0.294118
MosOpn3	20600	10.6	0.294118
MosOpn3	20700	10.7	0.294118
MosOpn3	20800	10.8	0.294118
MosOpn3	20900	10.9	0
MosOpn3	21000	11	0
MosOpn3	21100	11.1	0
MosOpn3	21200	11.2	0
MosOpn3	21300	11.3	0
MosOpn3	21400	11.4	0
MosOpn3	21500	11.5	0.294118
MosOpn3	21600	11.6	0.294118
MosOpn3	21700	11.7	0.294118
MosOpn3	21800	11.8	0.294118
MosOpn3	21900	11.9	0.294118
MosOpn3	22000	12	0.294118
MosOpn3	22100	12.1	0.294118
MosOpn3	22200	12.2	0.294118
MosOpn3	22300	12.3	0.294118
MosOpn3	22400	12.4	0.294118
MosOpn3	22500	12.5	0
MosOpn3	22600	12.6	0
MosOpn3	22700	12.7	0
MosOpn3	22800	12.8	0
MosOpn3	22900	12.9	0
MosOpn3	23000	13	0
MosOpn3	23100	13.1	0
MosOpn3	23200	13.2	0
MosOpn3	23300	13.3	0
MosOpn3	23400	13.4	0
MosOpn3	23500	13.5	0
MosOpn3	23600	13.6	0
MosOpn3	23700	13.7	0
MosOpn3	23800	13.8	0
MosOpn3	23900	13.9	0
MosOpn3	24000	14	0.294118
MosOpn3	24100	14.1	0.294118
MosOpn3	24200	14.2	0.294118
MosOpn3	24300	14.3	0.294118
MosOpn3	24400	14.4	0.294118
MosOpn3	24500	14.5	0.294118
MosOpn3	24600	14.6	0.294118
MosOpn3	24700	14.7	0.294118
MosOpn3	24800	14.8	0.294118
MosOpn3	24900	14.9	0.294118
MosOpn3	25000	15	0
MosOpn3	25100	15.1	0
MosOpn3	25200	15.2	0
MosOpn3	25300	15.3	0
MosOpn3	25400	15.4	0
MosOpn3	25500	15.5	0
MosOpn3	25600	15.6	0
MosOpn3	25700	15.7	0.294118
MosOpn3	25800	15.8	0.294118
MosOpn3	25900	15.9	0.294118
MosOpn3	26000	16	0.294118
MosOpn3	26100	16.1	0.294118
MosOpn3	26200	16.2	0.294118
MosOpn3	26300	16.3	0.294118
MosOpn3	26400	16.4	0.294118
MosOpn3	26500	16.5	0.294118
MosOpn3	26600	16.6	0.294118
MosOpn3	26700	16.7	0
MosOpn3	26800	16.8	0
MosOpn3	26900	16.9	0
MosOpn3	27000	17	0
MosOpn3	27100	17.1	0.294118
MosOpn3	27200	17.2	0.294118
MosOpn3	27300	17.3	0.294118
MosOpn3	27400	17.4	0.294118
MosOpn3	27500	17.5	0.294118
MosOpn3	27600	17.6	0.294118
MosOpn3	27700	17.7	0.294118
MosOpn3	27800	17.8	0.294118
MosOpn3	27900	17.9	0.294118
MosOpn3	28000	18	0.294118
MosOpn3	28100	18.1	0
MosOpn3	28200	18.2	0
MosOpn3	28300	18.3	0
MosOpn3	28400	18.4	0
MosOpn3	28500	18.5	0
MosOpn3	28600	18.6	0
MosOpn3	28700	18.7	0
MosOpn3	28800	18.8	0
MosOpn3	28900	18.9	0
MosOpn3	29000	19	0
MosOpn3	29100	19.1	0.294118
MosOpn3	29200	19.2	0.294118
MosOpn3	29300	19.3	0.294118
MosOpn3	29400	19.4	0.294118
MosOpn3	29500	19.5	0.294118
MosOpn3	29600	19.6	0.588235
MosOpn3	29700	19.7	0.588235
MosOpn3	29800	19.8	0.588235
MosOpn3	29900	19.9	0.588235
MosOpn3	30000	20	0.588235
MosOpn3	30100	20.1	0.294118
MosOpn3	30200	20.2	0.294118
MosOpn3	30300	20.3	0.294118
MosOpn3	30400	20.4	0.294118
MosOpn3	30500	20.5	0.294118
MosOpn3	30600	20.6	0
MosOpn3	30700	20.7	0
MosOpn3	30800	20.8	0
MosOpn3	30900	20.9	0
MosOpn3	31000	21	0
MosOpn3	31100	21.1	0
MosOpn3	31200	21.2	0
MosOpn3	31300	21.3	0
MosOpn3	31400	21.4	0
MosOpn3	31500	21.5	0
MosOpn3	31600	21.6	0
MosOpn3	31700	21.7	0
MosOpn3	31800	21.8	0
MosOpn3	31900	21.9	0
MosOpn3	32000	22	0
MosOpn3	32100	22.1	0
MosOpn3	32200	22.2	0
MosOpn3	32300	22.3	0
MosOpn3	32400	22.4	0.294118
MosOpn3	32500	22.5	0.294118
MosOpn3	32600	22.6	0.294118
MosOpn3	32700	22.7	0.294118
MosOpn3	32800	22.8	0.294118
MosOpn3	32900	22.9	0.294118
MosOpn3	33000	23	0.294118
MosOpn3	33100	23.1	0.294118
MosOpn3	33200	23.2	0.294118
MosOpn3	33300	23.3	0.294118
MosOpn3	33400	23.4	0
MosOpn3	33500	23.5	0
MosOpn3	33600	23.6	0
MosOpn3	33700	23.7	0
MosOpn3	33800	23.8	0
MosOpn3	33900	23.9	0.294118
MosOpn3	34000	24	0.294118
MosOpn3	34100	24.1	0.294118
MosOpn3	34200	24.2	0.294118
MosOpn3	34300	24.3	0.294118
MosOpn3	34400	24.4	0.294118
MosOpn3	34500	24.5	0.294118
MosOpn3	34600	24.6	0.294118
MosOpn3	34700	24.7	0.294118
MosOpn3	34800	24.8	0.294118
MosOpn3	34900	24.9	0
MosOpn3	35000	25	0
MosOpn3	35100	25.1	0
MosOpn3	35200	25.2	0
MosOpn3	35300	25.3	0.294118
MosOpn3	35400	25.4	0.294118
MosOpn3	35500	25.5	0.294118
MosOpn3	35600	25.6	0.294118
MosOpn3	35700	25.7	0.294118
MosOpn3	35800	25.8	0.294118
MosOpn3	35900	25.9	0.294118
MosOpn3	36000	26	0.294118
MosOpn3	36100	26.1	0.294118
MosOpn3	36200	26.2	0.294118
MosOpn3	36300	26.3	0
MosOpn3	36400	26.4	0
MosOpn3	36500	26.5	0
MosOpn3	36600	26.6	0.294118
MosOpn3	36700	26.7	0.294118
MosOpn3	36800	26.8	0.294118
MosOpn3	36900	26.9	0.294118
MosOpn3	37000	27	0.294118
MosOpn3	37100	27.1	0.294118
MosOpn3	37200	27.2	0.294118
MosOpn3	37300	27.3	0.294118
MosOpn3	37400	27.4	0.294118
MosOpn3	37500	27.5	0.294118
MosOpn3	37600	27.6	0
MosOpn3	37700	27.7	0.294118
MosOpn3	37800	27.8	0.294118
MosOpn3	37900	27.9	0.294118
MosOpn3	38000	28	0.294118
MosOpn3	38100	28.1	0.294118
MosOpn3	38200	28.2	0.294118
MosOpn3	38300	28.3	0.294118
MosOpn3	38400	28.4	0.294118
MosOpn3	38500	28.5	0.294118
MosOpn3	38600	28.6	0.294118
MosOpn3	38700	28.7	0
MosOpn3	38800	28.8	0
MosOpn3	38900	28.9	0
MosOpn3	39000	29	0
MosOpn3	39100	29.1	0.294118
MosOpn3	39200	29.2	0.294118
MosOpn3	39300	29.3	0.294118
MosOpn3	39400	29.4	0.294118
MosOpn3	39500	29.5	0.294118
MosOpn3	39600	29.6	0.294118
MosOpn3	39700	29.7	0.294118
MosOpn3	39800	29.8	0.294118
MosOpn3	39900	29.9	0.294118
MosOpn3	40000	30	0.294118
MosOpn3	40100	30.1	0.294118
MosOpn3	40200	30.2	0.294118
MosOpn3	40300	30.3	0.294118
MosOpn3	40400	30.4	0.294118
MosOpn3	40500	30.5	0.294118
MosOpn3	40600	30.6	0.294118
MosOpn3	40700	30.7	0.294118
MosOpn3	40800	30.8	0.294118
MosOpn3	40900	30.9	0.294118
MosOpn3	41000	31	0.294118
MosOpn3	41100	31.1	0
MosOpn3	41200	31.2	0
MosOpn3	41300	31.3	0
MosOpn3	41400	31.4	0
MosOpn3	41500	31.5	0.294118
MosOpn3	41600	31.6	0.294118
MosOpn3	41700	31.7	0.294118
MosOpn3	41800	31.8	0.294118
MosOpn3	41900	31.9	0.294118
MosOpn3	42000	32	0.294118
MosOpn3	42100	32.1	0.294118
MosOpn3	42200	32.2	0.294118
MosOpn3	42300	32.3	0.294118
MosOpn3	42400	32.4	0.294118
MosOpn3	42500	32.5	0
MosOpn3	42600	32.6	0
MosOpn3	42700	32.7	0.294118
MosOpn3	42800	32.8	0.294118
MosOpn3	42900	32.9	0.294118
MosOpn3	43000	33	0.294118
MosOpn3	43100	33.1	0.294118
MosOpn3	43200	33.2	0.294118
MosOpn3	43300	33.3	0.294118
MosOpn3	43400	33.4	0.294118
MosOpn3	43500	33.5	0.294118
MosOpn3	43600	33.6	0.294118
MosOpn3	43700	33.7	0
MosOpn3	43800	33.8	0.294118
MosOpn3	43900	33.9	0.294118
MosOpn3	44000	34	0.294118
MosOpn3	44100	34.1	0.294118
MosOpn3	44200	34.2	0.294118
MosOpn3	44300	34.3	0.294118
MosOpn3	44400	34.4	0.294118
MosOpn3	44500	34.5	0.294118
MosOpn3	500	-9.5	1.25
MosOpn3	600	-9.4	1
MosOpn3	700	-9.3	1
MosOpn3	800	-9.2	1
MosOpn3	900	-9.1	1
MosOpn3	1000	-9	1
MosOpn3	1100	-8.9	1
MosOpn3	1200	-8.8	1
MosOpn3	1300	-8.7	1
MosOpn3	1400	-8.6	0.75
MosOpn3	1500	-8.5	1
MosOpn3	1600	-8.4	1
MosOpn3	1700	-8.3	0.75
MosOpn3	1800	-8.2	1
MosOpn3	1900	-8.1	1
MosOpn3	2000	-8	0.75
MosOpn3	2100	-7.9	1
MosOpn3	2200	-7.8	0.75
MosOpn3	2300	-7.7	0.75
MosOpn3	2400	-7.6	1
MosOpn3	2500	-7.5	0.75
MosOpn3	2600	-7.4	0.75
MosOpn3	2700	-7.3	1
MosOpn3	2800	-7.2	0.75
MosOpn3	2900	-7.1	1
MosOpn3	3000	-7	1
MosOpn3	3100	-6.9	0.75
MosOpn3	3200	-6.8	1
MosOpn3	3300	-6.7	1
MosOpn3	3400	-6.6	0.75
MosOpn3	3500	-6.5	1
MosOpn3	3600	-6.4	1
MosOpn3	3700	-6.3	0.75
MosOpn3	3800	-6.2	1
MosOpn3	3900	-6.1	0.75
MosOpn3	4000	-6	1
MosOpn3	4100	-5.9	1
MosOpn3	4200	-5.8	0.75
MosOpn3	4300	-5.7	1
MosOpn3	4400	-5.6	1
MosOpn3	4500	-5.5	1
MosOpn3	4600	-5.4	1
MosOpn3	4700	-5.3	1
MosOpn3	4800	-5.2	0.75
MosOpn3	4900	-5.1	1
MosOpn3	5000	-5	0.75
MosOpn3	5100	-4.9	0.75
MosOpn3	5200	-4.8	1
MosOpn3	5300	-4.7	0.75
MosOpn3	5400	-4.6	1
MosOpn3	5500	-4.5	0.75
MosOpn3	5600	-4.4	0.75
MosOpn3	5700	-4.3	1
MosOpn3	5800	-4.2	1
MosOpn3	5900	-4.1	0.75
MosOpn3	6000	-4	1
MosOpn3	6100	-3.9	1
MosOpn3	6200	-3.8	0.75
MosOpn3	6300	-3.7	1
MosOpn3	6400	-3.6	0.75
MosOpn3	6500	-3.5	0.75
MosOpn3	6600	-3.4	1
MosOpn3	6700	-3.3	1
MosOpn3	6800	-3.2	1
MosOpn3	6900	-3.1	1
MosOpn3	7000	-3	0.75
MosOpn3	7100	-2.9	1
MosOpn3	7200	-2.8	1
MosOpn3	7300	-2.7	0.75
MosOpn3	7400	-2.6	1
MosOpn3	7500	-2.5	1
MosOpn3	7600	-2.4	0.75
MosOpn3	7700	-2.3	0.75
MosOpn3	7800	-2.2	0.75
MosOpn3	7900	-2.1	1
MosOpn3	8000	-2	1
MosOpn3	8100	-1.9	0.75
MosOpn3	8200	-1.8	0.75
MosOpn3	8300	-1.7	0.75
MosOpn3	8400	-1.6	0.75
MosOpn3	8500	-1.5	0.75
MosOpn3	8600	-1.4	0.75
MosOpn3	8700	-1.3	0.75
MosOpn3	8800	-1.2	1
MosOpn3	8900	-1.1	0.75
MosOpn3	9000	-1	0.75
MosOpn3	9100	-0.9	1
MosOpn3	9200	-0.8	0.75
MosOpn3	9300	-0.7	0.75
MosOpn3	9400	-0.6	0.75
MosOpn3	9500	-0.5	0.5
MosOpn3	9600	-0.4	0.5
MosOpn3	9700	-0.3	0.5
MosOpn3	9800	-0.2	0.25
MosOpn3	9900	-0.1	0.25
MosOpn3	10000	0	0.25
MosOpn3	10100	0.1	0.25
MosOpn3	10200	0.2	0.25
MosOpn3	10300	0.3	0
MosOpn3	10400	0.4	0
MosOpn3	10500	0.5	0
MosOpn3	10600	0.6	0
MosOpn3	10700	0.7	0
MosOpn3	10800	0.8	0
MosOpn3	10900	0.9	0
MosOpn3	11000	1	0
MosOpn3	11100	1.1	0
MosOpn3	11200	1.2	0.25
MosOpn3	11300	1.3	0.25
MosOpn3	11400	1.4	0.25
MosOpn3	11500	1.5	0.25
MosOpn3	11600	1.6	0.25
MosOpn3	11700	1.7	0.25
MosOpn3	11800	1.8	0.25
MosOpn3	11900	1.9	0.25
MosOpn3	12000	2	0.25
MosOpn3	12100	2.1	0.25
MosOpn3	12200	2.2	0
MosOpn3	12300	2.3	0
MosOpn3	12400	2.4	0
MosOpn3	12500	2.5	0
MosOpn3	12600	2.6	0
MosOpn3	12700	2.7	0
MosOpn3	12800	2.8	0
MosOpn3	12900	2.9	0
MosOpn3	13000	3	0
MosOpn3	13100	3.1	0
MosOpn3	13200	3.2	0
MosOpn3	13300	3.3	0
MosOpn3	13400	3.4	0
MosOpn3	13500	3.5	0
MosOpn3	13600	3.6	0
MosOpn3	13700	3.7	0
MosOpn3	13800	3.8	0
MosOpn3	13900	3.9	0
MosOpn3	14000	4	0.25
MosOpn3	14100	4.1	0.25
MosOpn3	14200	4.2	0.25
MosOpn3	14300	4.3	0.25
MosOpn3	14400	4.4	0.25
MosOpn3	14500	4.5	0.25
MosOpn3	14600	4.6	0.25
MosOpn3	14700	4.7	0.25
MosOpn3	14800	4.8	0.25
MosOpn3	14900	4.9	0.25
MosOpn3	15000	5	0
MosOpn3	15100	5.1	0
MosOpn3	15200	5.2	0
MosOpn3	15300	5.3	0
MosOpn3	15400	5.4	0
MosOpn3	15500	5.5	0
MosOpn3	15600	5.6	0
MosOpn3	15700	5.7	0
MosOpn3	15800	5.8	0
MosOpn3	15900	5.9	0
MosOpn3	16000	6	0
MosOpn3	16100	6.1	0.25
MosOpn3	16200	6.2	0.25
MosOpn3	16300	6.3	0.25
MosOpn3	16400	6.4	0.25
MosOpn3	16500	6.5	0.25
MosOpn3	16600	6.6	0.25
MosOpn3	16700	6.7	0.25
MosOpn3	16800	6.8	0.25
MosOpn3	16900	6.9	0.25
MosOpn3	17000	7	0.25
MosOpn3	17100	7.1	0
MosOpn3	17200	7.2	0
MosOpn3	17300	7.3	0
MosOpn3	17400	7.4	0
MosOpn3	17500	7.5	0
MosOpn3	17600	7.6	0
MosOpn3	17700	7.7	0
MosOpn3	17800	7.8	0.25
MosOpn3	17900	7.9	0.25
MosOpn3	18000	8	0.25
MosOpn3	18100	8.1	0.25
MosOpn3	18200	8.2	0.25
MosOpn3	18300	8.3	0.25
MosOpn3	18400	8.4	0.25
MosOpn3	18500	8.5	0.25
MosOpn3	18600	8.6	0.25
MosOpn3	18700	8.7	0.25
MosOpn3	18800	8.8	0
MosOpn3	18900	8.9	0
MosOpn3	19000	9	0
MosOpn3	19100	9.1	0
MosOpn3	19200	9.2	0
MosOpn3	19300	9.3	0
MosOpn3	19400	9.4	0
MosOpn3	19500	9.5	0
MosOpn3	19600	9.6	0
MosOpn3	19700	9.7	0
MosOpn3	19800	9.8	0
MosOpn3	19900	9.9	0
MosOpn3	20000	10	0
MosOpn3	20100	10.1	0.25
MosOpn3	20200	10.2	0.25
MosOpn3	20300	10.3	0.25
MosOpn3	20400	10.4	0.25
MosOpn3	20500	10.5	0.25
MosOpn3	20600	10.6	0.25
MosOpn3	20700	10.7	0.25
MosOpn3	20800	10.8	0.25
MosOpn3	20900	10.9	0.25
MosOpn3	21000	11	0.25
MosOpn3	21100	11.1	0
MosOpn3	21200	11.2	0
MosOpn3	21300	11.3	0
MosOpn3	21400	11.4	0
MosOpn3	21500	11.5	0
MosOpn3	21600	11.6	0
MosOpn3	21700	11.7	0
MosOpn3	21800	11.8	0
MosOpn3	21900	11.9	0.25
MosOpn3	22000	12	0.25
MosOpn3	22100	12.1	0.25
MosOpn3	22200	12.2	0.25
MosOpn3	22300	12.3	0.25
MosOpn3	22400	12.4	0.25
MosOpn3	22500	12.5	0.25
MosOpn3	22600	12.6	0.25
MosOpn3	22700	12.7	0.25
MosOpn3	22800	12.8	0.25
MosOpn3	22900	12.9	0
MosOpn3	23000	13	0
MosOpn3	23100	13.1	0
MosOpn3	23200	13.2	0
MosOpn3	23300	13.3	0.25
MosOpn3	23400	13.4	0.25
MosOpn3	23500	13.5	0.25
MosOpn3	23600	13.6	0.25
MosOpn3	23700	13.7	0.25
MosOpn3	23800	13.8	0.25
MosOpn3	23900	13.9	0.25
MosOpn3	24000	14	0.25
MosOpn3	24100	14.1	0.25
MosOpn3	24200	14.2	0.25
MosOpn3	24300	14.3	0
MosOpn3	24400	14.4	0
MosOpn3	24500	14.5	0
MosOpn3	24600	14.6	0
MosOpn3	24700	14.7	0
MosOpn3	24800	14.8	0.25
MosOpn3	24900	14.9	0.25
MosOpn3	25000	15	0.25
MosOpn3	25100	15.1	0.25
MosOpn3	25200	15.2	0.25
MosOpn3	25300	15.3	0.25
MosOpn3	25400	15.4	0.25
MosOpn3	25500	15.5	0.25
MosOpn3	25600	15.6	0.25
MosOpn3	25700	15.7	0.25
MosOpn3	25800	15.8	0
MosOpn3	25900	15.9	0
MosOpn3	26000	16	0
MosOpn3	26100	16.1	0
MosOpn3	26200	16.2	0
MosOpn3	26300	16.3	0.25
MosOpn3	26400	16.4	0.25
MosOpn3	26500	16.5	0.25
MosOpn3	26600	16.6	0.25
MosOpn3	26700	16.7	0.25
MosOpn3	26800	16.8	0.25
MosOpn3	26900	16.9	0.25
MosOpn3	27000	17	0.25
MosOpn3	27100	17.1	0.25
MosOpn3	27200	17.2	0.25
MosOpn3	27300	17.3	0
MosOpn3	27400	17.4	0
MosOpn3	27500	17.5	0
MosOpn3	27600	17.6	0
MosOpn3	27700	17.7	0.25
MosOpn3	27800	17.8	0.25
MosOpn3	27900	17.9	0.25
MosOpn3	28000	18	0.25
MosOpn3	28100	18.1	0.5
MosOpn3	28200	18.2	0.5
MosOpn3	28300	18.3	0.5
MosOpn3	28400	18.4	0.5
MosOpn3	28500	18.5	0.5
MosOpn3	28600	18.6	0.5
MosOpn3	28700	18.7	0.25
MosOpn3	28800	18.8	0.5
MosOpn3	28900	18.9	0.5
MosOpn3	29000	19	0.5
MosOpn3	29100	19.1	0.25
MosOpn3	29200	19.2	0.25
MosOpn3	29300	19.3	0.25
MosOpn3	29400	19.4	0.25
MosOpn3	29500	19.5	0.25
MosOpn3	29600	19.6	0.25
MosOpn3	29700	19.7	0.25
MosOpn3	29800	19.8	0.25
MosOpn3	29900	19.9	0.25
MosOpn3	30000	20	0.25
MosOpn3	30100	20.1	0.25
MosOpn3	30200	20.2	0.25
MosOpn3	30300	20.3	0.25
MosOpn3	30400	20.4	0.25
MosOpn3	30500	20.5	0.25
MosOpn3	30600	20.6	0.25
MosOpn3	30700	20.7	0.25
MosOpn3	30800	20.8	0
MosOpn3	30900	20.9	0
MosOpn3	31000	21	0.25
MosOpn3	31100	21.1	0.25
MosOpn3	31200	21.2	0.25
MosOpn3	31300	21.3	0.25
MosOpn3	31400	21.4	0.25
MosOpn3	31500	21.5	0.25
MosOpn3	31600	21.6	0.25
MosOpn3	31700	21.7	0.25
MosOpn3	31800	21.8	0.25
MosOpn3	31900	21.9	0.25
MosOpn3	32000	22	0
MosOpn3	32100	22.1	0.25
MosOpn3	32200	22.2	0.25
MosOpn3	32300	22.3	0.25
MosOpn3	32400	22.4	0.25
MosOpn3	32500	22.5	0.25
MosOpn3	32600	22.6	0.25
MosOpn3	32700	22.7	0.25
MosOpn3	32800	22.8	0.25
MosOpn3	32900	22.9	0.25
MosOpn3	33000	23	0.25
MosOpn3	33100	23.1	0.25
MosOpn3	33200	23.2	0.25
MosOpn3	33300	23.3	0.25
MosOpn3	33400	23.4	0.25
MosOpn3	33500	23.5	0.25
MosOpn3	33600	23.6	0.25
MosOpn3	33700	23.7	0.25
MosOpn3	33800	23.8	0.25
MosOpn3	33900	23.9	0.25
MosOpn3	34000	24	0.25
MosOpn3	34100	24.1	0
MosOpn3	34200	24.2	0.25
MosOpn3	34300	24.3	0.25
MosOpn3	34400	24.4	0.25
MosOpn3	34500	24.5	0.25
MosOpn3	34600	24.6	0.25
MosOpn3	34700	24.7	0.25
MosOpn3	34800	24.8	0.25
MosOpn3	34900	24.9	0.25
MosOpn3	35000	25	0.25
MosOpn3	35100	25.1	0.25
MosOpn3	35200	25.2	0
MosOpn3	35300	25.3	0.25
MosOpn3	35400	25.4	0.25
MosOpn3	35500	25.5	0.25
MosOpn3	35600	25.6	0.25
MosOpn3	35700	25.7	0.5
MosOpn3	35800	25.8	0.5
MosOpn3	35900	25.9	0.5
MosOpn3	36000	26	0.5
MosOpn3	36100	26.1	0.5
MosOpn3	36200	26.2	0.5
MosOpn3	36300	26.3	0.5
MosOpn3	36400	26.4	0.5
MosOpn3	36500	26.5	0.5
MosOpn3	36600	26.6	0.5
MosOpn3	36700	26.7	0.25
MosOpn3	36800	26.8	0.25
MosOpn3	36900	26.9	0.25
MosOpn3	37000	27	0.25
MosOpn3	37100	27.1	0.25
MosOpn3	37200	27.2	0.25
MosOpn3	37300	27.3	0
MosOpn3	37400	27.4	0
MosOpn3	37500	27.5	0.25
MosOpn3	37600	27.6	0.25
MosOpn3	37700	27.7	0.25
MosOpn3	37800	27.8	0.25
MosOpn3	37900	27.9	0.25
MosOpn3	38000	28	0.25
MosOpn3	38100	28.1	0.25
MosOpn3	38200	28.2	0.25
MosOpn3	38300	28.3	0.25
MosOpn3	38400	28.4	0.25
MosOpn3	38500	28.5	0
MosOpn3	38600	28.6	0.25
MosOpn3	38700	28.7	0.25
MosOpn3	38800	28.8	0.25
MosOpn3	38900	28.9	0.25
MosOpn3	39000	29	0.25
MosOpn3	39100	29.1	0.25
MosOpn3	39200	29.2	0.25
MosOpn3	39300	29.3	0.25
MosOpn3	39400	29.4	0.25
MosOpn3	39500	29.5	0.25
MosOpn3	39600	29.6	0.25
MosOpn3	39700	29.7	0.25
MosOpn3	39800	29.8	0.25
MosOpn3	39900	29.9	0.25
MosOpn3	40000	30	0.25
MosOpn3	40100	30.1	0.25
MosOpn3	40200	30.2	0.25
MosOpn3	40300	30.3	0.25
MosOpn3	40400	30.4	0.25
MosOpn3	40500	30.5	0.5
MosOpn3	40600	30.6	0.25
MosOpn3	40700	30.7	0.25
MosOpn3	40800	30.8	0.25
MosOpn3	40900	30.9	0.5
MosOpn3	41000	31	0.5
MosOpn3	41100	31.1	0.5
MosOpn3	41200	31.2	0.5
MosOpn3	41300	31.3	0.5
MosOpn3	41400	31.4	0.5
MosOpn3	41500	31.5	0.25
MosOpn3	41600	31.6	0.5
MosOpn3	41700	31.7	0.5
MosOpn3	41800	31.8	0.5
MosOpn3	41900	31.9	0.25
MosOpn3	42000	32	0.5
MosOpn3	42100	32.1	0.5
MosOpn3	42200	32.2	0.5
MosOpn3	42300	32.3	0.5
MosOpn3	42400	32.4	0.5
MosOpn3	42500	32.5	0.5
MosOpn3	42600	32.6	0.25
MosOpn3	42700	32.7	0.5
MosOpn3	42800	32.8	0.5
MosOpn3	42900	32.9	0.5
MosOpn3	43000	33	0.25
MosOpn3	43100	33.1	0.25
MosOpn3	43200	33.2	0.25
MosOpn3	43300	33.3	0.25
MosOpn3	43400	33.4	0.25
MosOpn3	43500	33.5	0.25
MosOpn3	43600	33.6	0.25
MosOpn3	43700	33.7	0
MosOpn3	43800	33.8	0
MosOpn3	43900	33.9	0.25
MosOpn3	44000	34	0.25
MosOpn3	44100	34.1	0.25
MosOpn3	44200	34.2	0.25
MosOpn3	44300	34.3	0.25
MosOpn3	44400	34.4	0.25
MosOpn3	44500	34.5	0.5
MosOpn3	500	-9.5	1.08108
MosOpn3	600	-9.4	0.810811
MosOpn3	700	-9.3	1.08108
MosOpn3	800	-9.2	1.08108
MosOpn3	900	-9.1	0.810811
MosOpn3	1000	-9	1.08108
MosOpn3	1100	-8.9	1.08108
MosOpn3	1200	-8.8	1.08108
MosOpn3	1300	-8.7	1.08108
MosOpn3	1400	-8.6	0.810811
MosOpn3	1500	-8.5	1.08108
MosOpn3	1600	-8.4	1.08108
MosOpn3	1700	-8.3	0.810811
MosOpn3	1800	-8.2	1.08108
MosOpn3	1900	-8.1	1.08108
MosOpn3	2000	-8	1.08108
MosOpn3	2100	-7.9	1.08108
MosOpn3	2200	-7.8	0.810811
MosOpn3	2300	-7.7	1.08108
MosOpn3	2400	-7.6	1.08108
MosOpn3	2500	-7.5	0.810811
MosOpn3	2600	-7.4	1.08108
MosOpn3	2700	-7.3	1.08108
MosOpn3	2800	-7.2	1.08108
MosOpn3	2900	-7.1	1.08108
MosOpn3	3000	-7	0.810811
MosOpn3	3100	-6.9	1.08108
MosOpn3	3200	-6.8	1.08108
MosOpn3	3300	-6.7	0.810811
MosOpn3	3400	-6.6	1.08108
MosOpn3	3500	-6.5	1.08108
MosOpn3	3600	-6.4	0.810811
MosOpn3	3700	-6.3	1.08108
MosOpn3	3800	-6.2	0.810811
MosOpn3	3900	-6.1	1.08108
MosOpn3	4000	-6	1.08108
MosOpn3	4100	-5.9	0.810811
MosOpn3	4200	-5.8	1.08108
MosOpn3	4300	-5.7	1.08108
MosOpn3	4400	-5.6	0.810811
MosOpn3	4500	-5.5	1.08108
MosOpn3	4600	-5.4	1.08108
MosOpn3	4700	-5.3	1.08108
MosOpn3	4800	-5.2	1.08108
MosOpn3	4900	-5.1	0.810811
MosOpn3	5000	-5	1.08108
MosOpn3	5100	-4.9	1.08108
MosOpn3	5200	-4.8	0.810811
MosOpn3	5300	-4.7	1.08108
MosOpn3	5400	-4.6	1.08108
MosOpn3	5500	-4.5	1.08108
MosOpn3	5600	-4.4	1.08108
MosOpn3	5700	-4.3	0.810811
MosOpn3	5800	-4.2	1.08108
MosOpn3	5900	-4.1	1.08108
MosOpn3	6000	-4	0.810811
MosOpn3	6100	-3.9	1.08108
MosOpn3	6200	-3.8	1.08108
MosOpn3	6300	-3.7	1.08108
MosOpn3	6400	-3.6	1.08108
MosOpn3	6500	-3.5	0.810811
MosOpn3	6600	-3.4	1.08108
MosOpn3	6700	-3.3	1.08108
MosOpn3	6800	-3.2	1.08108
MosOpn3	6900	-3.1	1.08108
MosOpn3	7000	-3	1.08108
MosOpn3	7100	-2.9	0.810811
MosOpn3	7200	-2.8	1.08108
MosOpn3	7300	-2.7	0.810811
MosOpn3	7400	-2.6	1.08108
MosOpn3	7500	-2.5	1.08108
MosOpn3	7600	-2.4	0.810811
MosOpn3	7700	-2.3	1.08108
MosOpn3	7800	-2.2	0.810811
MosOpn3	7900	-2.1	1.08108
MosOpn3	8000	-2	1.08108
MosOpn3	8100	-1.9	1.08108
MosOpn3	8200	-1.8	1.08108
MosOpn3	8300	-1.7	1.08108
MosOpn3	8400	-1.6	0.810811
MosOpn3	8500	-1.5	1.08108
MosOpn3	8600	-1.4	1.08108
MosOpn3	8700	-1.3	0.810811
MosOpn3	8800	-1.2	1.08108
MosOpn3	8900	-1.1	0.810811
MosOpn3	9000	-1	1.08108
MosOpn3	9100	-0.9	1.08108
MosOpn3	9200	-0.8	0.810811
MosOpn3	9300	-0.7	1.08108
MosOpn3	9400	-0.6	1.08108
MosOpn3	9500	-0.5	0.810811
MosOpn3	9600	-0.4	1.08108
MosOpn3	9700	-0.3	1.08108
MosOpn3	9800	-0.2	0.810811
MosOpn3	9900	-0.1	0.810811
MosOpn3	10000	0	0.540541
MosOpn3	10100	0.1	0.540541
MosOpn3	10200	0.2	0.540541
MosOpn3	10300	0.3	0.27027
MosOpn3	10400	0.4	0.27027
MosOpn3	10500	0.5	0.27027
MosOpn3	10600	0.6	0
MosOpn3	10700	0.7	0
MosOpn3	10800	0.8	0
MosOpn3	10900	0.9	0
MosOpn3	11000	1	0
MosOpn3	11100	1.1	0
MosOpn3	11200	1.2	0
MosOpn3	11300	1.3	0
MosOpn3	11400	1.4	0
MosOpn3	11500	1.5	0
MosOpn3	11600	1.6	0
MosOpn3	11700	1.7	0
MosOpn3	11800	1.8	0
MosOpn3	11900	1.9	0
MosOpn3	12000	2	0
MosOpn3	12100	2.1	0
MosOpn3	12200	2.2	0.27027
MosOpn3	12300	2.3	0.27027
MosOpn3	12400	2.4	0.27027
MosOpn3	12500	2.5	0.27027
MosOpn3	12600	2.6	0.27027
MosOpn3	12700	2.7	0.27027
MosOpn3	12800	2.8	0.27027
MosOpn3	12900	2.9	0.27027
MosOpn3	13000	3	0.27027
MosOpn3	13100	3.1	0.27027
MosOpn3	13200	3.2	0
MosOpn3	13300	3.3	0
MosOpn3	13400	3.4	0
MosOpn3	13500	3.5	0
MosOpn3	13600	3.6	0
MosOpn3	13700	3.7	0.27027
MosOpn3	13800	3.8	0.27027
MosOpn3	13900	3.9	0.27027
MosOpn3	14000	4	0.27027
MosOpn3	14100	4.1	0.27027
MosOpn3	14200	4.2	0.27027
MosOpn3	14300	4.3	0.27027
MosOpn3	14400	4.4	0.27027
MosOpn3	14500	4.5	0.27027
MosOpn3	14600	4.6	0.27027
MosOpn3	14700	4.7	0
MosOpn3	14800	4.8	0
MosOpn3	14900	4.9	0
MosOpn3	15000	5	0
MosOpn3	15100	5.1	0
MosOpn3	15200	5.2	0
MosOpn3	15300	5.3	0
MosOpn3	15400	5.4	0
MosOpn3	15500	5.5	0
MosOpn3	15600	5.6	0.27027
MosOpn3	15700	5.7	0.27027
MosOpn3	15800	5.8	0.27027
MosOpn3	15900	5.9	0.27027
MosOpn3	16000	6	0.27027
MosOpn3	16100	6.1	0.27027
MosOpn3	16200	6.2	0.27027
MosOpn3	16300	6.3	0.27027
MosOpn3	16400	6.4	0.27027
MosOpn3	16500	6.5	0.27027
MosOpn3	16600	6.6	0
MosOpn3	16700	6.7	0
MosOpn3	16800	6.8	0
MosOpn3	16900	6.9	0
MosOpn3	17000	7	0
MosOpn3	17100	7.1	0
MosOpn3	17200	7.2	0
MosOpn3	17300	7.3	0.27027
MosOpn3	17400	7.4	0.27027
MosOpn3	17500	7.5	0.27027
MosOpn3	17600	7.6	0.27027
MosOpn3	17700	7.7	0.27027
MosOpn3	17800	7.8	0.27027
MosOpn3	17900	7.9	0.27027
MosOpn3	18000	8	0.27027
MosOpn3	18100	8.1	0.27027
MosOpn3	18200	8.2	0.27027
MosOpn3	18300	8.3	0
MosOpn3	18400	8.4	0
MosOpn3	18500	8.5	0
MosOpn3	18600	8.6	0
MosOpn3	18700	8.7	0
MosOpn3	18800	8.8	0
MosOpn3	18900	8.9	0
MosOpn3	19000	9	0
MosOpn3	19100	9.1	0.27027
MosOpn3	19200	9.2	0.27027
MosOpn3	19300	9.3	0.27027
MosOpn3	19400	9.4	0.27027
MosOpn3	19500	9.5	0.27027
MosOpn3	19600	9.6	0.27027
MosOpn3	19700	9.7	0.27027
MosOpn3	19800	9.8	0.27027
MosOpn3	19900	9.9	0.27027
MosOpn3	20000	10	0.27027
MosOpn3	20100	10.1	0
MosOpn3	20200	10.2	0
MosOpn3	20300	10.3	0
MosOpn3	20400	10.4	0
MosOpn3	20500	10.5	0
MosOpn3	20600	10.6	0
MosOpn3	20700	10.7	0
MosOpn3	20800	10.8	0
MosOpn3	20900	10.9	0
MosOpn3	21000	11	0
MosOpn3	21100	11.1	0.27027
MosOpn3	21200	11.2	0.27027
MosOpn3	21300	11.3	0.27027
MosOpn3	21400	11.4	0.27027
MosOpn3	21500	11.5	0.27027
MosOpn3	21600	11.6	0.27027
MosOpn3	21700	11.7	0.27027
MosOpn3	21800	11.8	0.27027
MosOpn3	21900	11.9	0.27027
MosOpn3	22000	12	0.27027
MosOpn3	22100	12.1	0
MosOpn3	22200	12.2	0
MosOpn3	22300	12.3	0
MosOpn3	22400	12.4	0.27027
MosOpn3	22500	12.5	0.27027
MosOpn3	22600	12.6	0.27027
MosOpn3	22700	12.7	0.27027
MosOpn3	22800	12.8	0.27027
MosOpn3	22900	12.9	0.27027
MosOpn3	23000	13	0.27027
MosOpn3	23100	13.1	0.27027
MosOpn3	23200	13.2	0.27027
MosOpn3	23300	13.3	0.27027
MosOpn3	23400	13.4	0
MosOpn3	23500	13.5	0
MosOpn3	23600	13.6	0
MosOpn3	23700	13.7	0
MosOpn3	23800	13.8	0
MosOpn3	23900	13.9	0.27027
MosOpn3	24000	14	0.27027
MosOpn3	24100	14.1	0.27027
MosOpn3	24200	14.2	0.27027
MosOpn3	24300	14.3	0.27027
MosOpn3	24400	14.4	0.27027
MosOpn3	24500	14.5	0.27027
MosOpn3	24600	14.6	0.27027
MosOpn3	24700	14.7	0.27027
MosOpn3	24800	14.8	0.540541
MosOpn3	24900	14.9	0.27027
MosOpn3	25000	15	0.27027
MosOpn3	25100	15.1	0.27027
MosOpn3	25200	15.2	0.27027
MosOpn3	25300	15.3	0.27027
MosOpn3	25400	15.4	0.27027
MosOpn3	25500	15.5	0.27027
MosOpn3	25600	15.6	0.27027
MosOpn3	25700	15.7	0.27027
MosOpn3	25800	15.8	0
MosOpn3	25900	15.9	0.27027
MosOpn3	26000	16	0.27027
MosOpn3	26100	16.1	0.27027
MosOpn3	26200	16.2	0.27027
MosOpn3	26300	16.3	0.27027
MosOpn3	26400	16.4	0.27027
MosOpn3	26500	16.5	0.27027
MosOpn3	26600	16.6	0.27027
MosOpn3	26700	16.7	0.27027
MosOpn3	26800	16.8	0.27027
MosOpn3	26900	16.9	0
MosOpn3	27000	17	0
MosOpn3	27100	17.1	0
MosOpn3	27200	17.2	0
MosOpn3	27300	17.3	0.27027
MosOpn3	27400	17.4	0.27027
MosOpn3	27500	17.5	0.27027
MosOpn3	27600	17.6	0.27027
MosOpn3	27700	17.7	0.27027
MosOpn3	27800	17.8	0.27027
MosOpn3	27900	17.9	0.27027
MosOpn3	28000	18	0.27027
MosOpn3	28100	18.1	0.27027
MosOpn3	28200	18.2	0.27027
MosOpn3	28300	18.3	0
MosOpn3	28400	18.4	0
MosOpn3	28500	18.5	0
MosOpn3	28600	18.6	0
MosOpn3	28700	18.7	0
MosOpn3	28800	18.8	0.27027
MosOpn3	28900	18.9	0.27027
MosOpn3	29000	19	0.27027
MosOpn3	29100	19.1	0.27027
MosOpn3	29200	19.2	0.27027
MosOpn3	29300	19.3	0.27027
MosOpn3	29400	19.4	0.27027
MosOpn3	29500	19.5	0.27027
MosOpn3	29600	19.6	0.540541
MosOpn3	29700	19.7	0.540541
MosOpn3	29800	19.8	0.27027
MosOpn3	29900	19.9	0.27027
MosOpn3	30000	20	0.27027
MosOpn3	30100	20.1	0.27027
MosOpn3	30200	20.2	0.27027
MosOpn3	30300	20.3	0.27027
MosOpn3	30400	20.4	0.27027
MosOpn3	30500	20.5	0.27027
MosOpn3	30600	20.6	0.27027
MosOpn3	30700	20.7	0.27027
MosOpn3	30800	20.8	0.27027
MosOpn3	30900	20.9	0.27027
MosOpn3	31000	21	0.27027
MosOpn3	31100	21.1	0.27027
MosOpn3	31200	21.2	0.27027
MosOpn3	31300	21.3	0.27027
MosOpn3	31400	21.4	0.27027
MosOpn3	31500	21.5	0.27027
MosOpn3	31600	21.6	0
MosOpn3	31700	21.7	0.27027
MosOpn3	31800	21.8	0.27027
MosOpn3	31900	21.9	0.27027
MosOpn3	32000	22	0.27027
MosOpn3	32100	22.1	0.27027
MosOpn3	32200	22.2	0.27027
MosOpn3	32300	22.3	0.27027
MosOpn3	32400	22.4	0.27027
MosOpn3	32500	22.5	0.27027
MosOpn3	32600	22.6	0.540541
MosOpn3	32700	22.7	0.27027
MosOpn3	32800	22.8	0.27027
MosOpn3	32900	22.9	0.27027
MosOpn3	33000	23	0.27027
MosOpn3	33100	23.1	0.27027
MosOpn3	33200	23.2	0.27027
MosOpn3	33300	23.3	0.27027
MosOpn3	33400	23.4	0.27027
MosOpn3	33500	23.5	0.27027
MosOpn3	33600	23.6	0
MosOpn3	33700	23.7	0
MosOpn3	33800	23.8	0.27027
MosOpn3	33900	23.9	0.27027
MosOpn3	34000	24	0.27027
MosOpn3	34100	24.1	0.27027
MosOpn3	34200	24.2	0.27027
MosOpn3	34300	24.3	0.27027
MosOpn3	34400	24.4	0.27027
MosOpn3	34500	24.5	0.27027
MosOpn3	34600	24.6	0.27027
MosOpn3	34700	24.7	0.27027
MosOpn3	34800	24.8	0
MosOpn3	34900	24.9	0.27027
MosOpn3	35000	25	0.27027
MosOpn3	35100	25.1	0.27027
MosOpn3	35200	25.2	0.27027
MosOpn3	35300	25.3	0.27027
MosOpn3	35400	25.4	0.27027
MosOpn3	35500	25.5	0.27027
MosOpn3	35600	25.6	0.27027
MosOpn3	35700	25.7	0.27027
MosOpn3	35800	25.8	0.27027
MosOpn3	35900	25.9	0
MosOpn3	36000	26	0.27027
MosOpn3	36100	26.1	0.27027
MosOpn3	36200	26.2	0.27027
MosOpn3	36300	26.3	0.27027
MosOpn3	36400	26.4	0.27027
MosOpn3	36500	26.5	0.27027
MosOpn3	36600	26.6	0.27027
MosOpn3	36700	26.7	0.27027
MosOpn3	36800	26.8	0.27027
MosOpn3	36900	26.9	0.27027
MosOpn3	37000	27	0
MosOpn3	37100	27.1	0.27027
MosOpn3	37200	27.2	0.27027
MosOpn3	37300	27.3	0.27027
MosOpn3	37400	27.4	0.27027
MosOpn3	37500	27.5	0.27027
MosOpn3	37600	27.6	0.27027
MosOpn3	37700	27.7	0.27027
MosOpn3	37800	27.8	0.27027
MosOpn3	37900	27.9	0.27027
MosOpn3	38000	28	0.27027
MosOpn3	38100	28.1	0
MosOpn3	38200	28.2	0
MosOpn3	38300	28.3	0.27027
MosOpn3	38400	28.4	0.27027
MosOpn3	38500	28.5	0.27027
MosOpn3	38600	28.6	0.27027
MosOpn3	38700	28.7	0.27027
MosOpn3	38800	28.8	0.27027
MosOpn3	38900	28.9	0.27027
MosOpn3	39000	29	0.27027
MosOpn3	39100	29.1	0.27027
MosOpn3	39200	29.2	0.27027
MosOpn3	39300	29.3	0
MosOpn3	39400	29.4	0.27027
MosOpn3	39500	29.5	0.27027
MosOpn3	39600	29.6	0.27027
MosOpn3	39700	29.7	0.27027
MosOpn3	39800	29.8	0.27027
MosOpn3	39900	29.9	0.27027
MosOpn3	40000	30	0.27027
MosOpn3	40100	30.1	0.27027
MosOpn3	40200	30.2	0.27027
MosOpn3	40300	30.3	0.27027
MosOpn3	40400	30.4	0
MosOpn3	40500	30.5	0
MosOpn3	40600	30.6	0.27027
MosOpn3	40700	30.7	0.27027
MosOpn3	40800	30.8	0.27027
MosOpn3	40900	30.9	0.27027
MosOpn3	41000	31	0.27027
MosOpn3	41100	31.1	0.27027
MosOpn3	41200	31.2	0.27027
MosOpn3	41300	31.3	0.27027
MosOpn3	41400	31.4	0.27027
MosOpn3	41500	31.5	0.27027
MosOpn3	41600	31.6	0
MosOpn3	41700	31.7	0
MosOpn3	41800	31.8	0
MosOpn3	41900	31.9	0.27027
MosOpn3	42000	32	0.27027
MosOpn3	42100	32.1	0.27027
MosOpn3	42200	32.2	0.27027
MosOpn3	42300	32.3	0.27027
MosOpn3	42400	32.4	0.27027
MosOpn3	42500	32.5	0.27027
MosOpn3	42600	32.6	0.27027
MosOpn3	42700	32.7	0.27027
MosOpn3	42800	32.8	0.27027
MosOpn3	42900	32.9	0.27027
MosOpn3	43000	33	0.27027
MosOpn3	43100	33.1	0.27027
MosOpn3	43200	33.2	0.27027
MosOpn3	43300	33.3	0.27027
MosOpn3	43400	33.4	0.27027
MosOpn3	43500	33.5	0.27027
MosOpn3	43600	33.6	0.27027
MosOpn3	43700	33.7	0.27027
MosOpn3	43800	33.8	0.27027
MosOpn3	43900	33.9	0.27027
MosOpn3	44000	34	0.27027
MosOpn3	44100	34.1	0.27027
MosOpn3	44200	34.2	0.27027
MosOpn3	44300	34.3	0.27027
MosOpn3	44400	34.4	0.27027
MosOpn3	44500	34.5	0.27027
MosOpn3	500	-9.5	1.08108
MosOpn3	600	-9.4	1.08108
MosOpn3	700	-9.3	0.810811
MosOpn3	800	-9.2	1.08108
MosOpn3	900	-9.1	1.08108
MosOpn3	1000	-9	0.810811
MosOpn3	1100	-8.9	1.08108
MosOpn3	1200	-8.8	1.08108
MosOpn3	1300	-8.7	1.08108
MosOpn3	1400	-8.6	1.08108
MosOpn3	1500	-8.5	0.810811
MosOpn3	1600	-8.4	1.08108
MosOpn3	1700	-8.3	1.08108
MosOpn3	1800	-8.2	0.810811
MosOpn3	1900	-8.1	1.08108
MosOpn3	2000	-8	1.08108
MosOpn3	2100	-7.9	0.810811
MosOpn3	2200	-7.8	1.08108
MosOpn3	2300	-7.7	0.810811
MosOpn3	2400	-7.6	1.08108
MosOpn3	2500	-7.5	1.08108
MosOpn3	2600	-7.4	0.810811
MosOpn3	2700	-7.3	1.08108
MosOpn3	2800	-7.2	1.08108
MosOpn3	2900	-7.1	0.810811
MosOpn3	3000	-7	1.08108
MosOpn3	3100	-6.9	1.08108
MosOpn3	3200	-6.8	1.08108
MosOpn3	3300	-6.7	1.08108
MosOpn3	3400	-6.6	0.810811
MosOpn3	3500	-6.5	1.08108
MosOpn3	3600	-6.4	1.08108
MosOpn3	3700	-6.3	0.810811
MosOpn3	3800	-6.2	1.08108
MosOpn3	3900	-6.1	1.08108
MosOpn3	4000	-6	1.08108
MosOpn3	4100	-5.9	1.08108
MosOpn3	4200	-5.8	0.810811
MosOpn3	4300	-5.7	1.08108
MosOpn3	4400	-5.6	1.08108
MosOpn3	4500	-5.5	0.810811
MosOpn3	4600	-5.4	1.08108
MosOpn3	4700	-5.3	1.08108
MosOpn3	4800	-5.2	0.810811
MosOpn3	4900	-5.1	1.08108
MosOpn3	5000	-5	0.810811
MosOpn3	5100	-4.9	1.08108
MosOpn3	5200	-4.8	1.08108
MosOpn3	5300	-4.7	0.810811
MosOpn3	5400	-4.6	1.08108
MosOpn3	5500	-4.5	1.08108
MosOpn3	5600	-4.4	0.810811
MosOpn3	5700	-4.3	1.08108
MosOpn3	5800	-4.2	1.08108
MosOpn3	5900	-4.1	1.08108
MosOpn3	6000	-4	1.08108
MosOpn3	6100	-3.9	0.810811
MosOpn3	6200	-3.8	1.08108
MosOpn3	6300	-3.7	1.08108
MosOpn3	6400	-3.6	0.810811
MosOpn3	6500	-3.5	1.08108
MosOpn3	6600	-3.4	1.08108
MosOpn3	6700	-3.3	1.08108
MosOpn3	6800	-3.2	1.08108
MosOpn3	6900	-3.1	0.810811
MosOpn3	7000	-3	1.08108
MosOpn3	7100	-2.9	1.08108
MosOpn3	7200	-2.8	0.810811
MosOpn3	7300	-2.7	1.08108
MosOpn3	7400	-2.6	1.08108
MosOpn3	7500	-2.5	1.08108
MosOpn3	7600	-2.4	1.08108
MosOpn3	7700	-2.3	0.810811
MosOpn3	7800	-2.2	1.08108
MosOpn3	7900	-2.1	1.08108
MosOpn3	8000	-2	0.810811
MosOpn3	8100	-1.9	1.08108
MosOpn3	8200	-1.8	1.08108
MosOpn3	8300	-1.7	0.810811
MosOpn3	8400	-1.6	1.08108
MosOpn3	8500	-1.5	0.810811
MosOpn3	8600	-1.4	1.08108
MosOpn3	8700	-1.3	1.08108
MosOpn3	8800	-1.2	0.810811
MosOpn3	8900	-1.1	1.08108
MosOpn3	9000	-1	1.08108
MosOpn3	9100	-0.9	0.810811
MosOpn3	9200	-0.8	1.08108
MosOpn3	9300	-0.7	1.08108
MosOpn3	9400	-0.6	1.08108
MosOpn3	9500	-0.5	1.08108
MosOpn3	9600	-0.4	0.810811
MosOpn3	9700	-0.3	1.08108
MosOpn3	9800	-0.2	1.08108
MosOpn3	9900	-0.1	0.810811
MosOpn3	10000	0	0.810811
MosOpn3	10100	0.1	0.810811
MosOpn3	10200	0.2	0.540541
MosOpn3	10300	0.3	0.540541
MosOpn3	10400	0.4	0.27027
MosOpn3	10500	0.5	0.27027
MosOpn3	10600	0.6	0.27027
MosOpn3	10700	0.7	0
MosOpn3	10800	0.8	0
MosOpn3	10900	0.9	0
MosOpn3	11000	1	0
MosOpn3	11100	1.1	0
MosOpn3	11200	1.2	0
MosOpn3	11300	1.3	0
MosOpn3	11400	1.4	0
MosOpn3	11500	1.5	0
MosOpn3	11600	1.6	0
MosOpn3	11700	1.7	0
MosOpn3	11800	1.8	0
MosOpn3	11900	1.9	0
MosOpn3	12000	2	0
MosOpn3	12100	2.1	0
MosOpn3	12200	2.2	0.27027
MosOpn3	12300	2.3	0.27027
MosOpn3	12400	2.4	0.27027
MosOpn3	12500	2.5	0.27027
MosOpn3	12600	2.6	0.27027
MosOpn3	12700	2.7	0.27027
MosOpn3	12800	2.8	0.27027
MosOpn3	12900	2.9	0.27027
MosOpn3	13000	3	0.27027
MosOpn3	13100	3.1	0.27027
MosOpn3	13200	3.2	0
MosOpn3	13300	3.3	0
MosOpn3	13400	3.4	0
MosOpn3	13500	3.5	0
MosOpn3	13600	3.6	0
MosOpn3	13700	3.7	0.27027
MosOpn3	13800	3.8	0.27027
MosOpn3	13900	3.9	0.27027
MosOpn3	14000	4	0.27027
MosOpn3	14100	4.1	0.27027
MosOpn3	14200	4.2	0.27027
MosOpn3	14300	4.3	0.27027
MosOpn3	14400	4.4	0.27027
MosOpn3	14500	4.5	0.27027
MosOpn3	14600	4.6	0.27027
MosOpn3	14700	4.7	0
MosOpn3	14800	4.8	0
MosOpn3	14900	4.9	0
MosOpn3	15000	5	0
MosOpn3	15100	5.1	0
MosOpn3	15200	5.2	0.27027
MosOpn3	15300	5.3	0.27027
MosOpn3	15400	5.4	0.27027
MosOpn3	15500	5.5	0.27027
MosOpn3	15600	5.6	0.27027
MosOpn3	15700	5.7	0.27027
MosOpn3	15800	5.8	0.27027
MosOpn3	15900	5.9	0.27027
MosOpn3	16000	6	0.27027
MosOpn3	16100	6.1	0.27027
MosOpn3	16200	6.2	0
MosOpn3	16300	6.3	0
MosOpn3	16400	6.4	0
MosOpn3	16500	6.5	0
MosOpn3	16600	6.6	0.27027
MosOpn3	16700	6.7	0.27027
MosOpn3	16800	6.8	0.27027
MosOpn3	16900	6.9	0.27027
MosOpn3	17000	7	0.27027
MosOpn3	17100	7.1	0.27027
MosOpn3	17200	7.2	0.27027
MosOpn3	17300	7.3	0.27027
MosOpn3	17400	7.4	0.27027
MosOpn3	17500	7.5	0.27027
MosOpn3	17600	7.6	0
MosOpn3	17700	7.7	0
MosOpn3	17800	7.8	0
MosOpn3	17900	7.9	0
MosOpn3	18000	8	0
MosOpn3	18100	8.1	0
MosOpn3	18200	8.2	0.27027
MosOpn3	18300	8.3	0.27027
MosOpn3	18400	8.4	0.27027
MosOpn3	18500	8.5	0.27027
MosOpn3	18600	8.6	0.27027
MosOpn3	18700	8.7	0.27027
MosOpn3	18800	8.8	0.27027
MosOpn3	18900	8.9	0.27027
MosOpn3	19000	9	0.27027
MosOpn3	19100	9.1	0.27027
MosOpn3	19200	9.2	0
MosOpn3	19300	9.3	0
MosOpn3	19400	9.4	0
MosOpn3	19500	9.5	0
MosOpn3	19600	9.6	0
MosOpn3	19700	9.7	0
MosOpn3	19800	9.8	0
MosOpn3	19900	9.9	0
MosOpn3	20000	10	0
MosOpn3	20100	10.1	0.27027
MosOpn3	20200	10.2	0.27027
MosOpn3	20300	10.3	0.27027
MosOpn3	20400	10.4	0.27027
MosOpn3	20500	10.5	0.27027
MosOpn3	20600	10.6	0.27027
MosOpn3	20700	10.7	0.27027
MosOpn3	20800	10.8	0.27027
MosOpn3	20900	10.9	0.27027
MosOpn3	21000	11	0.27027
MosOpn3	21100	11.1	0
MosOpn3	21200	11.2	0
MosOpn3	21300	11.3	0
MosOpn3	21400	11.4	0
MosOpn3	21500	11.5	0
MosOpn3	21600	11.6	0
MosOpn3	21700	11.7	0
MosOpn3	21800	11.8	0.27027
MosOpn3	21900	11.9	0.27027
MosOpn3	22000	12	0.27027
MosOpn3	22100	12.1	0.27027
MosOpn3	22200	12.2	0.27027
MosOpn3	22300	12.3	0.27027
MosOpn3	22400	12.4	0.27027
MosOpn3	22500	12.5	0.27027
MosOpn3	22600	12.6	0.27027
MosOpn3	22700	12.7	0.27027
MosOpn3	22800	12.8	0
MosOpn3	22900	12.9	0.27027
MosOpn3	23000	13	0.27027
MosOpn3	23100	13.1	0.27027
MosOpn3	23200	13.2	0.27027
MosOpn3	23300	13.3	0.27027
MosOpn3	23400	13.4	0.27027
MosOpn3	23500	13.5	0.27027
MosOpn3	23600	13.6	0.27027
MosOpn3	23700	13.7	0.27027
MosOpn3	23800	13.8	0.27027
MosOpn3	23900	13.9	0
[truncated: 22,745 more rows]

## Sheet: D
Line	Tg(UAS:opto-tool) or Control	Sample_number	Trial_number	Cardiac arrest
MosOpn3	Tg(UAS:opto-tool)	1	1	yes
MosOpn3	Tg(UAS:opto-tool)	1	2	yes
MosOpn3	Tg(UAS:opto-tool)	1	3	yes
MosOpn3	Tg(UAS:opto-tool)	1	4	yes
MosOpn3	Tg(UAS:opto-tool)	1	5	yes
MosOpn3	Tg(UAS:opto-tool)	1	6	yes
MosOpn3	Tg(UAS:opto-tool)	2	1	yes
MosOpn3	Tg(UAS:opto-tool)	2	2	yes
MosOpn3	Tg(UAS:opto-tool)	2	3	yes
MosOpn3	Tg(UAS:opto-tool)	2	4	yes
MosOpn3	Tg(UAS:opto-tool)	2	5	yes
MosOpn3	Tg(UAS:opto-tool)	2	6	yes
MosOpn3	Tg(UAS:opto-tool)	3	1	yes
MosOpn3	Tg(UAS:opto-tool)	3	2	yes
MosOpn3	Tg(UAS:opto-tool)	3	3	yes
MosOpn3	Tg(UAS:opto-tool)	3	4	yes
MosOpn3	Tg(UAS:opto-tool)	3	5	yes
MosOpn3	Tg(UAS:opto-tool)	3	6	yes
MosOpn3	Tg(UAS:opto-tool)	4	1	yes
MosOpn3	Tg(UAS:opto-tool)	4	2	yes
MosOpn3	Tg(UAS:opto-tool)	4	3	yes
MosOpn3	Tg(UAS:opto-tool)	4	4	yes
MosOpn3	Tg(UAS:opto-tool)	4	5	yes
MosOpn3	Tg(UAS:opto-tool)	4	6	yes
MosOpn3	Control	1	1	no
MosOpn3	Control	1	2	no
MosOpn3	Control	1	3	no
MosOpn3	Control	1	4	no
MosOpn3	Control	1	5	no
MosOpn3	Control	1	6	no
MosOpn3	Control	2	1	no
MosOpn3	Control	2	2	no
MosOpn3	Control	2	3	no
MosOpn3	Control	2	4	no
MosOpn3	Control	2	5	no
MosOpn3	Control	2	6	no
MosOpn3	Control	3	1	no
MosOpn3	Control	3	2	no
MosOpn3	Control	3	3	no
MosOpn3	Control	3	4	no
MosOpn3	Control	3	5	no
MosOpn3	Control	3	6	no
MosOpn3	Control	4	1	no
MosOpn3	Control	4	2	no
MosOpn3	Control	4	3	no
MosOpn3	Control	4	4	no
MosOpn3	Control	4	5	no
MosOpn3	Control	4	6	no
PufTMT	Tg(UAS:opto-tool)	1	1	yes
PufTMT	Tg(UAS:opto-tool)	1	2	yes
PufTMT	Tg(UAS:opto-tool)	1	3	yes
PufTMT	Tg(UAS:opto-tool)	1	4	yes
PufTMT	Tg(UAS:opto-tool)	1	5	yes
PufTMT	Tg(UAS:opto-tool)	1	6	yes
PufTMT	Tg(UAS:opto-tool)	2	1	yes
PufTMT	Tg(UAS:opto-tool)	2	2	yes
PufTMT	Tg(UAS:opto-tool)	2	3	yes
PufTMT	Tg(UAS:opto-tool)	2	4	yes
PufTMT	Tg(UAS:opto-tool)	2	5	yes
PufTMT	Tg(UAS:opto-tool)	2	6	yes
PufTMT	Tg(UAS:opto-tool)	3	1	yes
PufTMT	Tg(UAS:opto-tool)	3	2	yes
PufTMT	Tg(UAS:opto-tool)	3	3	yes
PufTMT	Tg(UAS:opto-tool)	3	4	yes
PufTMT	Tg(UAS:opto-tool)	3	5	yes
PufTMT	Tg(UAS:opto-tool)	3	6	yes
PufTMT	Tg(UAS:opto-tool)	4	1	yes
PufTMT	Tg(UAS:opto-tool)	4	2	yes
PufTMT	Tg(UAS:opto-tool)	4	3	yes
PufTMT	Tg(UAS:opto-tool)	4	4	yes
PufTMT	Tg(UAS:opto-tool)	4	5	yes
PufTMT	Tg(UAS:opto-tool)	4	6	yes
PufTMT	Control	1	1	no
PufTMT	Control	1	2	no
PufTMT	Control	1	3	no
PufTMT	Control	1	4	no
PufTMT	Control	1	5	no
PufTMT	Control	1	6	no
PufTMT	Control	2	1	no
PufTMT	Control	2	2	no
PufTMT	Control	2	3	no
PufTMT	Control	2	4	no
PufTMT	Control	2	5	no
PufTMT	Control	2	6	no
PufTMT	Control	3	1	no
PufTMT	Control	3	2	no
PufTMT	Control	3	3	no
PufTMT	Control	3	4	no
PufTMT	Control	3	5	no
PufTMT	Control	3	6	no
PufTMT	Control	4	1	no
PufTMT	Control	4	2	no
PufTMT	Control	4	3	no
PufTMT	Control	4	4	no
PufTMT	Control	4	5	no
PufTMT	Control	4	6	no
LamPP	Tg(UAS:opto-tool)	1	1	yes
LamPP	Tg(UAS:opto-tool)	1	2	yes
LamPP	Tg(UAS:opto-tool)	1	3	yes
LamPP	Tg(UAS:opto-tool)	1	4	yes
LamPP	Tg(UAS:opto-tool)	1	5	yes
LamPP	Tg(UAS:opto-tool)	1	6	yes
LamPP	Tg(UAS:opto-tool)	2	1	yes
LamPP	Tg(UAS:opto-tool)	2	2	yes
LamPP	Tg(UAS:opto-tool)	2	3	yes
LamPP	Tg(UAS:opto-tool)	2	4	yes
LamPP	Tg(UAS:opto-tool)	2	5	yes
LamPP	Tg(UAS:opto-tool)	2	6	yes
LamPP	Tg(UAS:opto-tool)	3	1	yes
LamPP	Tg(UAS:opto-tool)	3	2	yes
LamPP	Tg(UAS:opto-tool)	3	3	yes
LamPP	Tg(UAS:opto-tool)	3	4	yes
LamPP	Tg(UAS:opto-tool)	3	5	yes
LamPP	Tg(UAS:opto-tool)	3	6	yes
LamPP	Tg(UAS:opto-tool)	4	1	yes
LamPP	Tg(UAS:opto-tool)	4	2	yes
LamPP	Tg(UAS:opto-tool)	4	3	yes
LamPP	Tg(UAS:opto-tool)	4	4	yes
LamPP	Tg(UAS:opto-tool)	4	5	yes
LamPP	Tg(UAS:opto-tool)	4	6	yes
LamPP	Control	1	1	no
LamPP	Control	1	2	no
LamPP	Control	1	3	no
LamPP	Control	1	4	no
LamPP	Control	1	5	no
LamPP	Control	1	6	no
LamPP	Control	2	1	no
LamPP	Control	2	2	no
LamPP	Control	2	3	no
LamPP	Control	2	4	no
LamPP	Control	2	5	no
LamPP	Control	2	6	no
LamPP	Control	3	1	no
LamPP	Control	3	2	no
LamPP	Control	3	3	no
LamPP	Control	3	4	no
LamPP	Control	3	5	no
LamPP	Control	3	6	no
LamPP	Control	4	1	no
LamPP	Control	4	2	no
LamPP	Control	4	3	no
LamPP	Control	4	4	no
LamPP	Control	4	5	no
LamPP	Control	4	6	no

## Sheet: E
Line	Sample_number	Trial_number	Latency to cardiac arrest (ms)
MosOpn3	1	1	277
MosOpn3	1	2	261
MosOpn3	1	3	381
MosOpn3	1	4	591
MosOpn3	1	5	231
MosOpn3	1	6	381
MosOpn3	2	1	1295
MosOpn3	2	2	1115
MosOpn3	2	3	785
MosOpn3	2	4	441
MosOpn3	2	5	426
MosOpn3	2	6	471
MosOpn3	3	1	3482
MosOpn3	3	2	1340
MosOpn3	3	3	21
MosOpn3	3	4	605
MosOpn3	3	5	1684
MosOpn3	3	6	785
MosOpn3	4	1	336
MosOpn3	4	2	470
MosOpn3	4	3	407
MosOpn3	4	4	784
MosOpn3	4	5	1685
MosOpn3	4	6	1235
PufTMT	1	1	338
PufTMT	1	2	563
PufTMT	1	3	439
PufTMT	1	4	968
PufTMT	1	5	788
PufTMT	1	6	812
PufTMT	2	1	548
PufTMT	2	2	1237
PufTMT	2	3	698
PufTMT	2	4	1028
PufTMT	2	5	968
PufTMT	2	6	1687
PufTMT	3	1	980
PufTMT	3	2	785
PufTMT	3	3	152
PufTMT	3	4	692
PufTMT	3	5	311
PufTMT	3	6	470
PufTMT	4	1	1939
PufTMT	4	2	2584
PufTMT	4	3	1280
PufTMT	4	4	861
PufTMT	4	5	1330
PufTMT	4	6	1452
LamPP	1	1	1280
LamPP	1	2	591
LamPP	1	3	516
LamPP	1	4	486
LamPP	1	5	381
LamPP	1	6	546
LamPP	2	1	953
LamPP	2	2	713
LamPP	2	3	1492
LamPP	2	4	1013
LamPP	2	5	1073
LamPP	2	6	1040
LamPP	3	1	1492
LamPP	3	2	1013
LamPP	3	3	1028
LamPP	3	4	1687
LamPP	3	5	1147
LamPP	3	6	1238
LamPP	4	1	156
LamPP	4	2	321
LamPP	4	3	291
LamPP	4	4	531
LamPP	4	5	1924
LamPP	4	6	815

## Sheet: F
Line	Sample_number	Trial_number	Time to resumption of heartbeat (ms)
MosOpn3	1	1	2918
MosOpn3	1	2	6234
MosOpn3	1	3	6559
MosOpn3	1	4	7487
MosOpn3	1	5	8881
MosOpn3	1	6	7203
MosOpn3	2	1	3457
MosOpn3	2	2	775
MosOpn3	2	3	6813
MosOpn3	2	4	745
MosOpn3	2	5	910
MosOpn3	2	6	939
MosOpn3	3	1	32870
MosOpn3	3	2	19039
MosOpn3	3	3	24194
MosOpn3	3	4	20000
MosOpn3	3	5	24179
MosOpn3	3	6	23370
MosOpn3	4	1	3052
MosOpn3	4	2	3171
MosOpn3	4	3	2269
MosOpn3	4	4	2212
MosOpn3	4	5	2213
MosOpn3	4	6	2453
PufTMT	1	1	402
PufTMT	1	2	1406
PufTMT	1	3	961
PufTMT	1	4	1406
PufTMT	1	5	462
PufTMT	1	6	472
PufTMT	2	1	13109
PufTMT	2	2	10217
PufTMT	2	3	8898
PufTMT	2	4	14142
PufTMT	2	5	13139
PufTMT	2	6	14159
PufTMT	3	1	4235
PufTMT	3	2	1853
PufTMT	3	3	1699
PufTMT	3	4	6839
PufTMT	3	5	1903
PufTMT	3	6	1583
PufTMT	4	1	1793
PufTMT	4	2	10289
PufTMT	4	3	2767
PufTMT	4	4	6663
PufTMT	4	5	9010
PufTMT	4	6	8760
LamPP	1	1	20000
LamPP	1	2	13601
LamPP	1	3	15339
LamPP	1	4	16447
LamPP	1	5	13571
LamPP	1	6	13271
LamPP	2	1	16135
LamPP	2	2	11340
LamPP	2	3	12610
LamPP	2	4	7849
LamPP	2	5	7939
LamPP	2	6	7870
LamPP	3	1	14667
LamPP	3	2	14008
LamPP	3	3	13573
LamPP	3	4	5871
LamPP	3	5	3099
LamPP	3	6	1241
LamPP	4	1	29873
LamPP	4	2	23295
LamPP	4	3	19195
LamPP	4	4	4221
LamPP	4	5	2168
LamPP	4	6	2258

## Sheet: G
Line	sample number	trial number	Time	Relative heart size
GtACR1	1	1	0	1
GtACR1	1	1	1	1.07543
GtACR1	1	1	2	1.07731
GtACR1	1	1	3	1.10125
GtACR1	1	1	4	1.11135
GtACR1	1	1	5	1.14042
GtACR1	1	2	0	1
GtACR1	1	2	1	1.02125
GtACR1	1	2	2	1.0443
GtACR1	1	2	3	1.05845
GtACR1	1	2	4	1.06949
GtACR1	1	2	5	1.07251
GtACR1	1	3	0	1
GtACR1	1	3	1	1.14417
GtACR1	1	3	2	1.22165
GtACR1	1	3	3	1.25247
GtACR1	1	3	4	1.25211
GtACR1	1	3	5	1.25349
GtACR1	1	4	0	1
GtACR1	1	4	1	1.05123
GtACR1	1	4	2	1.0645
GtACR1	1	4	3	1.08211
GtACR1	1	4	4	1.09427
GtACR1	1	4	5	1.10436
GtACR1	1	5	0	1
GtACR1	1	5	1	1.09472
GtACR1	1	5	2	1.12001
GtACR1	1	5	3	1.13331
GtACR1	1	5	4	1.13925
GtACR1	1	5	5	1.15218
GtACR1	2	1	0	1
GtACR1	2	1	1	1.03889
GtACR1	2	1	2	1.05021
GtACR1	2	1	3	1.05478
GtACR1	2	1	4	1.06315
GtACR1	2	1	5	1.08067
GtACR1	2	2	0	1
GtACR1	2	2	1	1.02171
GtACR1	2	2	2	1.02163
GtACR1	2	2	3	1.03105
GtACR1	2	2	4	1.03896
GtACR1	2	2	5	1.04235
GtACR1	2	3	0	1
GtACR1	2	3	1	1.01176
GtACR1	2	3	2	1.03187
GtACR1	2	3	3	1.03746
GtACR1	2	3	4	1.03934
GtACR1	2	3	5	1.05102
GtACR1	2	4	0	1
GtACR1	2	4	1	1.0024
GtACR1	2	4	2	1.01138
GtACR1	2	4	3	1.01481
GtACR1	2	4	4	1.02055
GtACR1	2	4	5	1.02651
GtACR1	2	5	0	1
GtACR1	2	5	1	1.02734
GtACR1	2	5	2	1.04128
GtACR1	2	5	3	1.04961
GtACR1	2	5	4	1.05046
GtACR1	2	5	5	1.05086
ChrimsonR	1	1	0	1
ChrimsonR	1	1	1	1.05414
ChrimsonR	1	1	2	1.033
ChrimsonR	1	1	3	1.02693
ChrimsonR	1	1	4	0.994891
ChrimsonR	1	1	5	0.984855
ChrimsonR	1	2	0	1
ChrimsonR	1	2	1	1.01452
ChrimsonR	1	2	2	0.992822
ChrimsonR	1	2	3	0.981718
ChrimsonR	1	2	4	0.972265
ChrimsonR	1	2	5	0.94894
ChrimsonR	1	3	0	1
ChrimsonR	1	3	1	0.98307
ChrimsonR	1	3	2	0.961593
ChrimsonR	1	3	3	0.944787
ChrimsonR	1	3	4	0.931262
ChrimsonR	1	3	5	0.92025
ChrimsonR	1	4	0	1
ChrimsonR	1	4	1	0.981511
ChrimsonR	1	4	2	0.961201
ChrimsonR	1	4	3	0.951975
ChrimsonR	1	4	4	0.939087
ChrimsonR	1	4	5	0.927802
ChrimsonR	1	5	0	1
ChrimsonR	1	5	1	1.04406
ChrimsonR	1	5	2	1.02912
ChrimsonR	1	5	3	1.0248
ChrimsonR	1	5	4	1.02353
ChrimsonR	1	5	5	1.00658
ChrimsonR	2	1	0	1
ChrimsonR	2	1	1	1.03999
ChrimsonR	2	1	2	1.04273
ChrimsonR	2	1	3	1.02338
ChrimsonR	2	1	4	1.01125
ChrimsonR	2	1	5	1.01386
ChrimsonR	2	2	0	1
ChrimsonR	2	2	1	1.00072
ChrimsonR	2	2	2	0.980445
ChrimsonR	2	2	3	0.966757
ChrimsonR	2	2	4	0.956051
ChrimsonR	2	2	5	0.933309
ChrimsonR	2	3	0	1
ChrimsonR	2	3	1	1.05869
ChrimsonR	2	3	2	1.05751
ChrimsonR	2	3	3	1.05225
ChrimsonR	2	3	4	1.04442
ChrimsonR	2	3	5	1.03312
ChrimsonR	2	4	0	1
ChrimsonR	2	4	1	1.01263
ChrimsonR	2	4	2	0.998269
ChrimsonR	2	4	3	0.99671
ChrimsonR	2	4	4	0.99317
ChrimsonR	2	4	5	0.98851
ChrimsonR	2	5	0	1
ChrimsonR	2	5	1	1.0272
ChrimsonR	2	5	2	1.02709
ChrimsonR	2	5	3	1.02438
ChrimsonR	2	5	4	1.02066
ChrimsonR	2	5	5	1.02112
MosOpn3	1	1	0	1
MosOpn3	1	1	1	1.01951
MosOpn3	1	1	2	1.02651
MosOpn3	1	1	3	1.04152
MosOpn3	1	1	4	1.0709
MosOpn3	1	1	5	1.1059
MosOpn3	1	2	0	1
MosOpn3	1	2	1	1.0273
MosOpn3	1	2	2	1.08074
MosOpn3	1	2	3	1.09618
MosOpn3	1	2	4	1.10273
MosOpn3	1	2	5	1.1148
MosOpn3	1	3	0	1
MosOpn3	1	3	1	1.03128
MosOpn3	1	3	2	1.06063
MosOpn3	1	3	3	1.07052
MosOpn3	1	3	4	1.07338
MosOpn3	1	3	5	1.13653
MosOpn3	1	4	0	1
MosOpn3	1	4	1	1.05722
MosOpn3	1	4	2	1.05612
MosOpn3	1	4	3	1.062
MosOpn3	1	4	4	1.06131
MosOpn3	1	4	5	1.06693
MosOpn3	1	5	0	1
MosOpn3	1	5	1	1.1021
MosOpn3	1	5	2	1.1436
MosOpn3	1	5	3	1.14505
MosOpn3	1	5	4	1.14453
MosOpn3	1	5	5	1.1653
MosOpn3	2	1	0	1
MosOpn3	2	1	1	1.04626
MosOpn3	2	1	2	1.14812
MosOpn3	2	1	3	1.14251
MosOpn3	2	1	4	1.15178
MosOpn3	2	1	5	1.16938
MosOpn3	2	2	0	1
MosOpn3	2	2	1	1.08452
MosOpn3	2	2	2	1.10046
MosOpn3	2	2	3	1.11473
MosOpn3	2	2	4	1.11962
MosOpn3	2	2	5	1.12394
MosOpn3	2	3	0	1
MosOpn3	2	3	1	1.07155
MosOpn3	2	3	2	1.07902
MosOpn3	2	3	3	1.08691
MosOpn3	2	3	4	1.09524
MosOpn3	2	3	5	1.10825
MosOpn3	2	4	0	1
MosOpn3	2	4	1	1.0734
MosOpn3	2	4	2	1.0899
MosOpn3	2	4	3	1.12928
MosOpn3	2	4	4	1.12986
MosOpn3	2	4	5	1.13425
MosOpn3	2	5	0	1
MosOpn3	2	5	1	1.0635
MosOpn3	2	5	2	1.08916
MosOpn3	2	5	3	1.09678
MosOpn3	2	5	4	1.11939
MosOpn3	2	5	5	1.12907

## Sheet: H
Line	light intensity	Sample_number	Trial_number	Cardiac arrest
LamPPGi	0.4	1	1	yes
LamPPGi	0.05	1	2	no
LamPPGi	0.05	1	3	no
LamPPGi	0.05	1	4	no
LamPPGi	0.05	1	5	no
LamPPGi	0.05	1	6	no
LamPPGi	0.05	1	7	no
LamPPGi	0.2	1	8	yes
LamPPGi	0.2	1	9	yes
LamPPGi	0.2	1	10	no
LamPPGi	0.2	1	11	no
LamPPGi	0.2	1	12	no
LamPPGi	0.2	1	13	no
LamPPGi	0.4	2	1	yes
LamPPGi	0.05	2	2	yes
LamPPGi	0.05	2	3	no
LamPPGi	0.05	2	4	yes
LamPPGi	0.05	2	5	no
LamPPGi	0.05	2	6	no
LamPPGi	0.05	2	7	yes
LamPPGi	0.05	2	8	no
LamPPGi	0.2	2	9	yes
LamPPGi	0.2	2	10	yes
LamPPGi	0.2	2	11	yes
LamPPGi	0.2	2	12	yes
LamPPGi	0.2	2	13	yes
LamPPGi	0.4	3	1	yes
LamPPGi	0.05	3	2	no
LamPPGi	0.05	3	3	no
LamPPGi	0.05	3	4	no
LamPPGi	0.05	3	5	no
LamPPGi	0.05	3	6	no
LamPPGi	0.05	3	7	no
LamPPGi	0.2	3	8	yes
LamPPGi	0.2	3	9	yes
LamPPGi	0.2	3	10	yes
LamPPGi	0.2	3	11	no
LamPPGi	0.2	3	12	no
LamPPGi	0.2	3	13	no
LamPPGi	0.4	4	1	yes
LamPPGi	0.05	4	2	yes
LamPPGi	0.05	4	3	no
LamPPGi	0.05	4	4	yes
LamPPGi	0.05	4	5	yes
LamPPGi	0.05	4	6	yes
LamPPGi	0.05	4	7	yes
LamPPGi	0.2	4	8	yes
LamPPGi	0.2	4	9	yes
LamPPGi	0.2	4	10	yes
LamPPGi	0.2	4	11	yes
LamPPGi	0.2	4	12	yes
LamPPGi	0.2	4	13	yes
PufTMT	0.5	1	1	yes
PufTMT	0.05	1	2	no
PufTMT	0.05	1	3	no
PufTMT	0.05	1	4	no
PufTMT	0.05	1	5	no
PufTMT	0.05	1	6	no
PufTMT	0.05	1	7	no
PufTMT	0.2	1	8	no
PufTMT	0.2	1	9	no
PufTMT	0.2	1	10	no
PufTMT	0.2	1	11	no
PufTMT	0.2	1	12	no
PufTMT	0.2	1	13	no
PufTMT	0.5	2	1	yes
PufTMT	0.05	2	2	no
PufTMT	0.05	2	3	no
PufTMT	0.05	2	4	no
PufTMT	0.05	2	5	no
PufTMT	0.05	2	6	no
PufTMT	0.05	2	7	no
PufTMT	0.2	2	8	no
PufTMT	0.2	2	9	no
PufTMT	0.2	2	10	no
PufTMT	0.2	2	11	no
PufTMT	0.2	2	12	no
PufTMT	0.2	2	13	no
PufTMT	0.5	3	1	yes
PufTMT	0.05	3	2	yes
PufTMT	0.05	3	3	yes
PufTMT	0.05	3	4	no
PufTMT	0.05	3	5	no
PufTMT	0.05	3	6	no
PufTMT	0.05	3	7	no
PufTMT	0.2	3	8	yes
PufTMT	0.2	3	9	yes
PufTMT	0.2	3	10	yes
PufTMT	0.2	3	11	yes
PufTMT	0.2	3	12	yes
PufTMT	0.2	3	13	yes
MosOpn3	0.5	1	1	yes
MosOpn3	0.05	1	2	yes
MosOpn3	0.05	1	3	yes
MosOpn3	0.05	1	4	yes
MosOpn3	0.05	1	5	yes
MosOpn3	0.05	1	6	yes
MosOpn3	0.05	1	7	no
MosOpn3	0.2	1	8	yes
MosOpn3	0.2	1	9	yes
MosOpn3	0.2	1	10	yes
MosOpn3	0.2	1	11	yes
MosOpn3	0.2	1	12	yes
MosOpn3	0.2	1	13	yes
MosOpn3	0.5	2	1	yes
MosOpn3	0.05	2	2	yes
MosOpn3	0.05	2	3	yes
MosOpn3	0.05	2	4	yes
MosOpn3	0.05	2	5	yes
MosOpn3	0.05	2	6	yes
MosOpn3	0.05	2	7	yes
MosOpn3	0.2	2	8	yes
MosOpn3	0.2	2	9	yes
MosOpn3	0.2	2	10	yes
MosOpn3	0.2	2	11	yes
MosOpn3	0.2	2	12	yes
MosOpn3	0.2	2	13	yes
MosOpn3	0.5	3	1	yes
MosOpn3	0.05	3	2	yes
MosOpn3	0.05	3	3	yes
MosOpn3	0.05	3	4	yes
MosOpn3	0.05	3	5	yes
MosOpn3	0.05	3	6	yes
MosOpn3	0.05	3	7	yes
MosOpn3	0.2	3	8	yes
MosOpn3	0.2	3	9	yes
MosOpn3	0.2	3	10	yes
MosOpn3	0.2	3	11	yes
MosOpn3	0.2	3	12	yes
MosOpn3	0.2	3	13	yes
MosOpn3	0.5	4	1	yes
MosOpn3	0.05	4	2	yes
MosOpn3	0.05	4	3	yes
MosOpn3	0.05	4	4	yes
MosOpn3	0.05	4	5	yes
MosOpn3	0.05	4	6	yes
MosOpn3	0.05	4	7	yes
MosOpn3	0.2	4	8	yes
MosOpn3	0.2	4	9	yes
MosOpn3	0.2	4	10	yes
MosOpn3	0.2	4	11	yes
MosOpn3	0.2	4	12	yes
MosOpn3	0.2	4	13	yes
PufTMT	0.5	4	1	yes
PufTMT	0.05	4	2	no
PufTMT	0.05	4	3	no
PufTMT	0.05	4	4	no
PufTMT	0.05	4	5	no
PufTMT	0.05	4	6	no
PufTMT	0.05	4	7	no
PufTMT	0.2	4	8	yes
PufTMT	0.2	4	9	no
PufTMT	0.2	4	10	yes
PufTMT	0.2	4	11	no
PufTMT	0.2	4	12	no
PufTMT	0.2	4	13	no
