# Supplementary material for: Optogenetic manipulation of Gq- and Gi/o-coupled receptor signaling in neurons and heart muscle cells
Source: eLife. 2023 Aug 17;12:e83974. doi: 10.7554/eLife.83974 (PMC10435233; doi:10.7554/eLife.83974)
Supplement: Figure 5—figure supplement 1—source data 1. [file elife-83974-fig5-figsupp1-data1.xlsx]

## Sheet: Sheet1
Line	sample	trial	time(s)	R_HB
LamPP	4	1	0	1
LamPP	4	1	0.1	0
LamPP	4	1	0.2	0
LamPP	4	1	0.3	0
LamPP	4	1	0.4	0
LamPP	4	1	0.5	0.617284
LamPP	4	1	0.6	0
LamPP	4	1	0.7	0
LamPP	4	1	0.8	0
LamPP	4	1	0.9	0
LamPP	4	1	1	1.23457
LamPP	4	1	1.1	1.23457
LamPP	4	1	1.2	1.23457
LamPP	4	1	1.3	1.23457
LamPP	4	1	1.4	0.617284
LamPP	4	1	1.5	1.23457
LamPP	4	1	1.6	1.23457
LamPP	4	1	1.7	1.23457
LamPP	4	1	1.8	1.23457
LamPP	4	1	1.9	1.23457
LamPP	4	1	2	1.23457
LamPP	4	1	2.1	1.23457
LamPP	4	1	2.2	1.23457
LamPP	4	1	2.3	1.23457
LamPP	4	1	2.4	0.617284
LamPP	4	1	2.5	0.617284
LamPP	4	1	2.6	0.617284
LamPP	4	1	2.7	0.617284
LamPP	4	1	2.8	0.617284
LamPP	4	1	2.9	0.617284
LamPP	4	1	3	0.617284
LamPP	4	1	3.1	0.617284
LamPP	4	1	3.2	0.617284
LamPP	4	1	3.3	0.617284
LamPP	4	1	3.4	0
LamPP	4	1	3.5	0.617284
LamPP	4	1	3.6	0.617284
LamPP	4	1	3.7	0.617284
LamPP	4	1	3.8	0.617284
LamPP	4	1	3.9	0.617284
LamPP	4	1	4	0.617284
LamPP	4	1	4.1	1.23457
LamPP	4	1	4.2	1.23457
LamPP	4	1	4.3	1.23457
LamPP	4	1	4.4	1.23457
LamPP	4	1	4.5	1.23457
LamPP	4	1	4.6	1.23457
LamPP	4	1	4.7	1.23457
LamPP	4	1	4.8	1.85185
LamPP	4	1	4.9	1.85185
LamPP	4	1	5	1.85185
LamPP	4	1	5.1	1.85185
LamPP	4	1	5.2	1.85185
LamPP	4	1	5.3	1.85185
LamPP	4	1	5.4	1.23457
LamPP	4	1	5.5	1.23457
LamPP	4	1	5.6	1.23457
LamPP	4	1	5.7	1.23457
LamPP	4	1	5.8	1.23457
LamPP	4	1	5.9	1.23457
LamPP	4	1	6	0.617284
LamPP	4	1	6.1	0.617284
LamPP	4	1	6.2	0.617284
LamPP	4	1	6.3	0.617284
LamPP	4	1	6.4	0.617284
LamPP	4	1	6.5	0.617284
LamPP	4	1	6.6	0.617284
LamPP	4	1	6.7	0
LamPP	4	1	6.8	0
LamPP	4	1	6.9	0
LamPP	4	1	7	0
LamPP	4	1	7.1	0
LamPP	4	1	7.2	0.617284
LamPP	4	1	7.3	0.617284
LamPP	4	1	7.4	0.617284
LamPP	4	1	7.5	0.617284
LamPP	4	1	7.6	0.617284
LamPP	4	1	7.7	0.617284
LamPP	4	1	7.8	0.617284
LamPP	4	1	7.9	0.617284
LamPP	4	1	8	0.617284
LamPP	4	1	8.1	0.617284
LamPP	4	1	8.2	1.23457
LamPP	4	1	8.3	1.23457
LamPP	4	1	8.4	1.23457
LamPP	4	1	8.5	1.85185
LamPP	4	1	8.6	1.85185
LamPP	4	1	8.7	1.85185
LamPP	4	1	8.8	1.85185
LamPP	4	1	8.9	1.85185
LamPP	4	1	9	1.85185
LamPP	4	1	9.1	1.23457
LamPP	4	1	9.2	1.85185
LamPP	4	1	9.3	1.85185
LamPP	4	1	9.4	1.85185
LamPP	4	1	9.5	1.85185
LamPP	4	1	9.6	1.85185
LamPP	4	1	9.7	2.46914
LamPP	4	1	9.8	2.46914
LamPP	4	1	9.9	2.46914
LamPP	4	1	10	2.46914
LamPP	4	1	10.1	1.85185
LamPP	4	1	10.2	1.85185
LamPP	4	1	10.3	1.85185
LamPP	4	1	10.4	1.23457
LamPP	4	1	10.5	1.23457
LamPP	4	1	10.6	1.23457
LamPP	4	1	10.7	1.23457
LamPP	4	1	10.8	1.23457
LamPP	4	1	10.9	1.23457
LamPP	4	1	11	1.23457
LamPP	4	1	11.1	0.617284
LamPP	4	1	11.2	0.617284
LamPP	4	1	11.3	0.617284
LamPP	4	1	11.4	0.617284
LamPP	4	1	11.5	0.617284
LamPP	4	1	11.6	0
LamPP	4	1	11.7	0
LamPP	4	1	11.8	0.617284
LamPP	4	1	11.9	0.617284
LamPP	4	1	12	0.617284
LamPP	4	1	12.1	0.617284
LamPP	4	1	12.2	0.617284
LamPP	4	1	12.3	0.617284
LamPP	4	1	12.4	0.617284
LamPP	4	1	12.5	0.617284
LamPP	4	1	12.6	0.617284
LamPP	4	1	12.7	0.617284
LamPP	4	1	12.8	0.617284
LamPP	4	1	12.9	0.617284
LamPP	4	1	13	0.617284
LamPP	4	1	13.1	0.617284
LamPP	4	1	13.2	0.617284
LamPP	4	1	13.3	0.617284
LamPP	4	1	13.4	0.617284
LamPP	4	1	13.5	0.617284
LamPP	4	1	13.6	0.617284
LamPP	4	1	13.7	0
LamPP	4	1	13.8	0
LamPP	4	1	13.9	0
LamPP	4	1	14	0
LamPP	4	1	14.1	0
LamPP	4	1	14.2	0
LamPP	4	1	14.3	0
LamPP	4	1	14.4	0
LamPP	4	1	14.5	0
LamPP	4	1	14.6	0
LamPP	4	1	14.7	0
LamPP	4	1	14.8	0
LamPP	4	1	14.9	0
LamPP	4	1	15	0
LamPP	4	1	15.1	0
LamPP	4	1	15.2	0
LamPP	4	1	15.3	0
LamPP	4	1	15.4	0
LamPP	4	1	15.5	0
LamPP	4	1	15.6	0
LamPP	4	1	15.7	0
LamPP	4	1	15.8	0
LamPP	4	1	15.9	0
LamPP	4	1	16	0
LamPP	4	1	16.1	0
LamPP	4	1	16.2	0
LamPP	4	1	16.3	0
LamPP	4	1	16.4	0
LamPP	4	1	16.5	0
LamPP	4	1	16.6	0
LamPP	4	1	16.7	0
LamPP	4	1	16.8	0
LamPP	4	1	16.9	0
LamPP	4	1	17	0
LamPP	4	1	17.1	0
LamPP	4	1	17.2	0
LamPP	4	1	17.3	0
LamPP	4	1	17.4	0
LamPP	4	1	17.5	0
LamPP	4	1	17.6	0
LamPP	4	1	17.7	0
LamPP	4	1	17.8	0
LamPP	4	1	17.9	0
LamPP	4	1	18	0
LamPP	4	1	18.1	0
LamPP	4	1	18.2	0
LamPP	4	1	18.3	0
LamPP	4	1	18.4	0
LamPP	4	1	18.5	0
LamPP	4	1	18.6	0
LamPP	4	1	18.7	0
LamPP	4	1	18.8	0
LamPP	4	1	18.9	0
LamPP	4	1	19	0
LamPP	4	1	19.1	0
LamPP	4	1	19.2	0
LamPP	4	1	19.3	0
LamPP	4	1	19.4	0
LamPP	4	1	19.5	0
LamPP	4	1	19.6	0
LamPP	4	1	19.7	0
LamPP	4	1	19.8	0
LamPP	4	1	19.9	0
LamPP	4	1	20	0
LamPP	4	1	20.1	0
LamPP	4	1	20.2	0
LamPP	4	1	20.3	0
LamPP	4	1	20.4	0
LamPP	4	1	20.5	0
LamPP	4	1	20.6	0
LamPP	4	1	20.7	0
LamPP	4	1	20.8	0
LamPP	4	1	20.9	0
LamPP	4	1	21	0
LamPP	4	1	21.1	0
LamPP	4	1	21.2	0
LamPP	4	1	21.3	0
LamPP	4	1	21.4	0
LamPP	4	1	21.5	0
LamPP	4	1	21.6	0
LamPP	4	1	21.7	0
LamPP	4	1	21.8	0
LamPP	4	1	21.9	0
LamPP	4	1	22	0
LamPP	4	1	22.1	0
LamPP	4	1	22.2	0
LamPP	4	1	22.3	0
LamPP	4	1	22.4	0
LamPP	4	1	22.5	0
LamPP	4	1	22.6	0
LamPP	4	1	22.7	0
LamPP	4	1	22.8	0
LamPP	4	1	22.9	0
LamPP	4	1	23	0
LamPP	4	1	23.1	0
LamPP	4	1	23.2	0
LamPP	4	1	23.3	0
LamPP	4	1	23.4	0
LamPP	4	1	23.5	0
LamPP	4	1	23.6	0
LamPP	4	1	23.7	0
LamPP	4	1	23.8	0
LamPP	4	1	23.9	0
LamPP	4	1	24	0
LamPP	4	1	24.1	0
LamPP	4	1	24.2	0
LamPP	4	1	24.3	0
LamPP	4	1	24.4	0
LamPP	4	1	24.5	0
LamPP	4	1	24.6	0
LamPP	4	1	24.7	0
LamPP	4	1	24.8	0
LamPP	4	1	24.9	0
LamPP	4	1	25	0
LamPP	4	1	25.1	0
LamPP	4	1	25.2	0
LamPP	4	1	25.3	0
LamPP	4	1	25.4	0
LamPP	4	1	25.5	0
LamPP	4	1	25.6	0
LamPP	4	1	25.7	0
LamPP	4	1	25.8	0
LamPP	4	1	25.9	0
LamPP	4	1	26	0
LamPP	4	1	26.1	0
LamPP	4	1	26.2	0
LamPP	4	1	26.3	0
LamPP	4	1	26.4	0
LamPP	4	1	26.5	0
LamPP	4	1	26.6	0
LamPP	4	1	26.7	0
LamPP	4	1	26.8	0
LamPP	4	1	26.9	0
LamPP	4	1	27	0
LamPP	4	1	27.1	0
LamPP	4	1	27.2	0
LamPP	4	1	27.3	0
LamPP	4	1	27.4	0
LamPP	4	1	27.5	0
LamPP	4	1	27.6	0
LamPP	4	1	27.7	0
LamPP	4	1	27.8	0
LamPP	4	1	27.9	0
LamPP	4	1	28	0
LamPP	4	1	28.1	0
LamPP	4	1	28.2	0
LamPP	4	1	28.3	0
LamPP	4	1	28.4	0
LamPP	4	1	28.5	0
LamPP	4	1	28.6	0
LamPP	4	1	28.7	0
LamPP	4	1	28.8	0
LamPP	4	1	28.9	0
LamPP	4	1	29	0
LamPP	4	1	29.1	0
LamPP	4	1	29.2	0
LamPP	4	1	29.3	0
LamPP	4	1	29.4	0
LamPP	4	1	29.5	0
LamPP	4	1	29.6	0
LamPP	4	1	29.7	0
LamPP	4	1	29.8	0
LamPP	4	1	29.9	0
LamPP	4	1	30	0
LamPP	4	1	30.1	0
LamPP	4	1	30.2	0
LamPP	4	1	30.3	0
LamPP	4	1	30.4	0
LamPP	4	1	30.5	0
LamPP	4	1	30.6	0
LamPP	4	1	30.7	0
LamPP	4	1	30.8	0
LamPP	4	1	30.9	0
LamPP	4	1	31	0
LamPP	4	1	31.1	0
LamPP	4	1	31.2	0
LamPP	4	1	31.3	0
LamPP	4	1	31.4	0
LamPP	4	1	31.5	0.617284
LamPP	4	1	31.6	0.617284
LamPP	4	1	31.7	0.617284
LamPP	4	1	31.8	0.617284
LamPP	4	1	31.9	0.617284
LamPP	4	1	32	0.617284
LamPP	4	1	32.1	0.617284
LamPP	4	1	32.2	0.617284
LamPP	4	1	32.3	0.617284
LamPP	4	1	32.4	0.617284
LamPP	4	1	32.5	0.617284
LamPP	4	1	32.6	0.617284
LamPP	4	1	32.7	0.617284
LamPP	4	1	32.8	0.617284
LamPP	4	1	32.9	0.617284
LamPP	4	1	33	0.617284
LamPP	4	1	33.1	0.617284
LamPP	4	1	33.2	0.617284
LamPP	4	1	33.3	0.617284
LamPP	4	1	33.4	0
LamPP	4	1	33.5	0
LamPP	4	1	33.6	0
LamPP	4	1	33.7	0
LamPP	4	1	33.8	0
LamPP	4	1	33.9	0
LamPP	4	1	34	0
LamPP	4	1	34.1	0
LamPP	4	1	34.2	0
LamPP	4	1	34.3	0
LamPP	4	1	34.4	0
LamPP	4	1	34.5	0
LamPP	4	1	34.6	0
LamPP	4	1	34.7	0
LamPP	4	1	34.8	0
LamPP	4	1	34.9	0
LamPP	4	1	35	0
LamPP	4	1	35.1	0
LamPP	4	1	35.2	0
LamPP	4	1	35.3	0
LamPP	4	1	35.4	0
LamPP	4	1	35.5	0
LamPP	4	1	35.6	0
LamPP	4	1	35.7	0
LamPP	4	1	35.8	0
LamPP	4	1	35.9	0.617284
LamPP	4	1	36	0.617284
LamPP	4	1	36.1	0.617284
LamPP	4	1	36.2	0.617284
LamPP	4	1	36.3	0.617284
LamPP	4	1	36.4	0.617284
LamPP	4	1	36.5	0.617284
LamPP	4	1	36.6	0.617284
LamPP	4	1	36.7	0.617284
LamPP	4	1	36.8	0.617284
LamPP	4	1	36.9	0.617284
LamPP	4	1	37	0.617284
LamPP	4	1	37.1	0.617284
LamPP	4	1	37.2	0.617284
LamPP	4	1	37.3	0.617284
LamPP	4	1	37.4	1.23457
LamPP	4	1	37.5	1.23457
LamPP	4	1	37.6	1.23457
LamPP	4	1	37.7	1.23457
LamPP	4	1	37.8	0.617284
LamPP	4	1	37.9	0.617284
LamPP	4	1	38	0.617284
LamPP	4	1	38.1	0.617284
LamPP	4	1	38.2	0.617284
LamPP	4	1	38.3	0.617284
LamPP	4	1	38.4	1.23457
LamPP	4	1	38.5	1.23457
LamPP	4	1	38.6	1.23457
LamPP	4	1	38.7	1.23457
LamPP	4	1	38.8	1.23457
LamPP	4	1	38.9	1.23457
LamPP	4	1	39	1.23457
LamPP	4	1	39.1	1.23457
LamPP	4	1	39.2	1.23457
LamPP	4	1	39.3	0.617284
LamPP	4	1	39.4	0.617284
LamPP	4	1	39.5	0.617284
LamPP	4	1	39.6	0.617284
LamPP	4	1	39.7	0.617284
LamPP	4	1	39.8	0.617284
LamPP	4	1	39.9	0.617284
LamPP	4	1	40	0.617284
LamPP	4	1	40.1	0.617284
LamPP	4	1	40.2	0.617284
LamPP	4	1	40.3	0
LamPP	4	1	40.4	0
LamPP	4	1	40.5	0
LamPP	4	1	40.6	0
LamPP	4	1	40.7	0
LamPP	4	1	40.8	0
LamPP	4	1	40.9	0
LamPP	4	1	41	0
LamPP	4	1	41.1	0
LamPP	4	1	41.2	0.617284
LamPP	4	1	41.3	0.617284
LamPP	4	1	41.4	0.617284
LamPP	4	1	41.5	0.617284
LamPP	4	1	41.6	0.617284
LamPP	4	1	41.7	0.617284
LamPP	4	1	41.8	0.617284
LamPP	4	1	41.9	0.617284
LamPP	4	1	42	0.617284
LamPP	4	1	42.1	0.617284
LamPP	4	1	42.2	0.617284
LamPP	4	1	42.3	0.617284
LamPP	4	1	42.4	0.617284
LamPP	4	1	42.5	0.617284
LamPP	4	1	42.6	0.617284
LamPP	4	1	42.7	0.617284
LamPP	4	1	42.8	0.617284
LamPP	4	1	42.9	0.617284
LamPP	4	1	43	0.617284
LamPP	4	1	43.1	0
LamPP	4	1	43.2	0
LamPP	4	1	43.3	0
LamPP	4	1	43.4	0
LamPP	4	1	43.5	0
LamPP	4	1	43.6	0
LamPP	4	1	43.7	0
LamPP	4	1	43.8	0
LamPP	4	1	43.9	0
LamPP	4	1	44	0
LamPP	4	1	44.1	0
LamPP	4	1	44.2	0
LamPP	4	1	44.3	0.617284
LamPP	4	1	44.4	0.617284
LamPP	4	1	44.5	0.617284
LamPP	4	1	44.6	0.617284
LamPP	4	1	44.7	0.617284
LamPP	4	1	44.8	0.617284
LamPP	4	1	44.9	0.617284
LamPP	4	1	45	0.617284
LamPP	4	1	45.1	0.617284
LamPP	4	1	45.2	0.617284
LamPP	4	1	45.3	0.617284
LamPP	4	1	45.4	0.617284
LamPP	4	1	45.5	0.617284
LamPP	4	1	45.6	0.617284
LamPP	4	1	45.7	0.617284
LamPP	4	1	45.8	0.617284
LamPP	4	1	45.9	0.617284
LamPP	4	1	46	0.617284
LamPP	4	1	46.1	0.617284
LamPP	4	1	46.2	0
LamPP	4	1	46.3	0
LamPP	4	1	46.4	0
LamPP	4	1	46.5	0
LamPP	4	1	46.6	0
LamPP	4	1	46.7	0
LamPP	4	1	46.8	0
LamPP	4	1	46.9	0
LamPP	4	1	47	0.617284
LamPP	4	1	47.1	0.617284
LamPP	4	1	47.2	0.617284
LamPP	4	1	47.3	0.617284
LamPP	4	1	47.4	0.617284
LamPP	4	1	47.5	0.617284
LamPP	4	1	47.6	0.617284
LamPP	4	1	47.7	0.617284
LamPP	4	1	47.8	0.617284
LamPP	4	1	47.9	0.617284
LamPP	4	1	48	0.617284
LamPP	4	1	48.1	0.617284
LamPP	4	1	48.2	0.617284
LamPP	4	1	48.3	0.617284
LamPP	4	1	48.4	0.617284
LamPP	4	1	48.5	0.617284
LamPP	4	1	48.6	0.617284
LamPP	4	1	48.7	0.617284
LamPP	4	1	48.8	0.617284
LamPP	4	1	48.9	0
LamPP	4	1	49	0
LamPP	4	1	49.1	0
LamPP	4	1	49.2	0
LamPP	4	1	49.3	0
LamPP	4	1	49.4	0.617284
LamPP	4	1	49.5	0.617284
LamPP	4	1	49.6	0.617284
LamPP	4	1	49.7	0.617284
LamPP	4	1	49.8	0.617284
LamPP	4	1	49.9	0.617284
LamPP	4	1	50	0.617284
LamPP	4	1	50.1	0.617284
LamPP	4	1	50.2	0.617284
LamPP	4	1	50.3	0.617284
LamPP	4	1	50.4	0.617284
LamPP	4	1	50.5	0.617284
LamPP	4	1	50.6	0.617284
LamPP	4	1	50.7	0.617284
LamPP	4	1	50.8	0.617284
LamPP	4	1	50.9	0.617284
LamPP	4	1	51	0.617284
LamPP	4	1	51.1	0.617284
LamPP	4	1	51.2	0.617284
LamPP	4	1	51.3	0
LamPP	4	1	51.4	0
LamPP	4	1	51.5	0.617284
LamPP	4	1	51.6	0.617284
LamPP	4	1	51.7	0.617284
LamPP	4	1	51.8	0.617284
LamPP	4	1	51.9	0.617284
LamPP	4	1	52	0.617284
LamPP	4	1	52.1	0.617284
LamPP	4	1	52.2	0.617284
LamPP	4	1	52.3	0.617284
LamPP	4	1	52.4	0.617284
LamPP	4	1	52.5	0.617284
LamPP	4	1	52.6	0.617284
LamPP	4	1	52.7	0.617284
LamPP	4	1	52.8	0.617284
LamPP	4	1	52.9	0.617284
LamPP	4	1	53	0.617284
LamPP	4	1	53.1	0.617284
LamPP	4	1	53.2	0.617284
LamPP	4	1	53.3	1.23457
LamPP	4	1	53.4	0.617284
LamPP	4	1	53.5	0.617284
LamPP	4	1	53.6	0.617284
LamPP	4	1	53.7	0.617284
LamPP	4	1	53.8	0.617284
LamPP	4	1	53.9	0.617284
LamPP	4	1	54	0.617284
LamPP	4	1	54.1	0.617284
LamPP	4	1	54.2	0.617284
LamPP	4	1	54.3	0.617284
LamPP	4	1	54.4	0.617284
LamPP	4	1	54.5	0.617284
LamPP	4	1	54.6	0.617284
LamPP	4	1	54.7	0.617284
LamPP	4	1	54.8	0.617284
LamPP	4	1	54.9	0.617284
LamPP	4	1	55	1.23457
LamPP	4	1	55.1	1.23457
LamPP	4	1	55.2	0.617284
LamPP	4	1	55.3	0.617284
LamPP	4	1	55.4	0.617284
LamPP	4	1	55.5	0.617284
LamPP	4	1	55.6	0.617284
LamPP	4	1	55.7	0.617284
LamPP	4	1	55.8	0.617284
LamPP	4	1	55.9	0.617284
LamPP	4	1	56	0.617284
LamPP	4	1	56.1	0.617284
LamPP	4	1	56.2	0.617284
LamPP	4	1	56.3	0.617284
LamPP	4	1	56.4	0.617284
LamPP	4	1	56.5	0.617284
LamPP	4	1	56.6	0.617284
LamPP	4	1	56.7	1.23457
LamPP	4	1	56.8	1.23457
LamPP	4	1	56.9	0.617284
LamPP	4	1	57	0.617284
LamPP	4	1	57.1	0.617284
LamPP	4	1	57.2	0.617284
LamPP	4	1	57.3	0.617284
LamPP	4	1	57.4	0.617284
LamPP	4	1	57.5	0.617284
LamPP	4	1	57.6	0.617284
LamPP	4	1	57.7	0.617284
LamPP	4	1	57.8	0.617284
LamPP	4	1	57.9	0.617284
LamPP	4	1	58	0.617284
LamPP	4	1	58.1	0.617284
LamPP	4	1	58.2	0.617284
LamPP	4	1	58.3	0.617284
LamPP	4	1	58.4	0.617284
LamPP	4	1	58.5	1.23457
LamPP	4	1	58.6	0.617284
LamPP	4	1	58.7	0.617284
LamPP	4	1	58.8	0.617284
LamPP	4	1	58.9	0.617284
LamPP	4	1	59	0.617284
LamPP	4	1	59.1	0.617284
LamPP	4	1	59.2	0.617284
LamPP	4	1	59.3	0.617284
LamPP	4	1	59.4	0.617284
LamPP	4	1	59.5	0.617284
LamPP	4	1	59.6	0.617284
LamPP	4	1	59.7	0.617284
LamPP	4	1	59.8	0.617284
LamPP	4	1	59.9	1.23457
LamPP	4	1	60	1.23457
LamPP	4	1	60.1	1.23457
LamPP	4	1	60.2	1.23457
LamPP	4	1	60.3	1.23457
LamPP	4	1	60.4	0.617284
LamPP	4	1	60.5	0.617284
LamPP	4	1	60.6	0.617284
LamPP	4	1	60.7	0.617284
LamPP	4	1	60.8	0.617284
LamPP	4	1	60.9	0.617284
LamPP	4	1	61	0.617284
LamPP	4	1	61.1	0.617284
LamPP	4	1	61.2	0.617284
LamPP	4	1	61.3	0.617284
LamPP	4	1	61.4	1.23457
LamPP	4	1	61.5	1.23457
LamPP	4	1	61.6	1.23457
LamPP	4	1	61.7	1.23457
LamPP	4	1	61.8	0.617284
LamPP	4	1	61.9	0.617284
LamPP	4	1	62	0.617284
LamPP	4	1	62.1	0.617284
LamPP	4	1	62.2	0.617284
LamPP	4	1	62.3	0.617284
LamPP	4	1	62.4	0.617284
LamPP	4	1	62.5	0.617284
LamPP	4	1	62.6	0.617284
LamPP	4	1	62.7	0.617284
LamPP	4	1	62.8	0.617284
LamPP	4	1	62.9	1.23457
LamPP	4	1	63	1.23457
LamPP	4	1	63.1	1.23457
LamPP	4	1	63.2	1.23457
LamPP	4	1	63.3	0.617284
LamPP	4	1	63.4	0.617284
LamPP	4	1	63.5	0.617284
LamPP	4	1	63.6	0.617284
LamPP	4	1	63.7	0.617284
LamPP	4	1	63.8	0.617284
LamPP	4	1	63.9	0.617284
LamPP	4	1	64	0.617284
LamPP	4	1	64.1	0.617284
LamPP	4	1	64.2	0.617284
LamPP	4	1	64.3	0.617284
LamPP	4	1	64.4	1.23457
LamPP	4	1	64.5	1.23457
LamPP	4	1	64.6	1.23457
LamPP	4	1	64.7	1.23457
LamPP	4	1	64.8	0.617284
LamPP	4	1	64.9	0.617284
LamPP	4	1	65	0.617284
LamPP	4	1	65.1	0.617284
LamPP	4	1	65.2	0.617284
LamPP	4	1	65.3	1.23457
LamPP	4	1	65.4	1.23457
LamPP	4	1	65.5	1.23457
LamPP	4	1	65.6	1.23457
LamPP	4	1	65.7	1.23457
LamPP	4	1	65.8	1.23457
LamPP	4	1	65.9	1.23457
LamPP	4	1	66	1.23457
LamPP	4	1	66.1	1.23457
LamPP	4	1	66.2	1.23457
LamPP	4	1	66.3	0.617284
LamPP	4	1	66.4	0.617284
LamPP	4	1	66.5	0.617284
LamPP	4	1	66.6	0.617284
LamPP	4	1	66.7	0.617284
LamPP	4	1	66.8	1.23457
LamPP	4	1	66.9	1.23457
LamPP	4	1	67	1.23457
LamPP	4	1	67.1	1.23457
LamPP	4	1	67.2	0.617284
LamPP	4	1	67.3	0.617284
LamPP	4	1	67.4	0.617284
LamPP	4	1	67.5	0.617284
LamPP	4	1	67.6	0.617284
LamPP	4	1	67.7	0.617284
LamPP	4	1	67.8	0.617284
LamPP	4	1	67.9	0.617284
LamPP	4	1	68	0.617284
LamPP	4	1	68.1	0.617284
LamPP	4	1	68.2	1.23457
LamPP	4	1	68.3	1.23457
LamPP	4	1	68.4	1.23457
LamPP	4	1	68.5	1.23457
LamPP	4	1	68.6	1.23457
LamPP	4	1	68.7	0.617284
LamPP	4	1	68.8	0.617284
LamPP	4	1	68.9	0.617284
LamPP	4	1	69	0.617284
LamPP	4	1	69.1	0.617284
LamPP	4	1	69.2	0.617284
LamPP	4	1	69.3	0.617284
LamPP	4	1	69.4	0.617284
LamPP	4	1	69.5	0.617284
LamPP	4	1	69.6	1.23457
LamPP	4	1	69.7	1.23457
LamPP	4	1	69.8	1.23457
LamPP	4	1	69.9	1.23457
LamPP	4	1	70	1.23457
LamPP	4	1	70.1	0.617284
LamPP	4	1	70.2	0.617284
LamPP	4	1	70.3	0.617284
LamPP	4	1	70.4	0.617284
LamPP	4	1	70.5	0.617284
LamPP	4	1	70.6	0.617284
LamPP	4	1	70.7	0.617284
LamPP	4	1	70.8	0.617284
LamPP	4	1	70.9	0.617284
LamPP	4	1	71	1.23457
LamPP	4	1	71.1	1.23457
LamPP	4	1	71.2	1.23457
LamPP	4	1	71.3	1.23457
LamPP	4	1	71.4	1.23457
LamPP	4	1	71.5	0.617284
LamPP	4	1	71.6	0.617284
LamPP	4	1	71.7	0.617284
LamPP	4	1	71.8	0.617284
LamPP	4	1	71.9	0.617284
LamPP	4	1	72	0.617284
LamPP	4	1	72.1	0.617284
LamPP	4	1	72.2	0.617284
LamPP	4	1	72.3	1.23457
LamPP	4	1	72.4	1.23457
LamPP	4	1	72.5	1.23457
LamPP	4	1	72.6	1.23457
LamPP	4	1	72.7	1.23457
LamPP	4	1	72.8	1.23457
LamPP	4	1	72.9	0.617284
LamPP	4	1	73	0.617284
LamPP	4	1	73.1	0.617284
LamPP	4	1	73.2	0.617284
LamPP	4	1	73.3	0.617284
LamPP	4	1	73.4	0.617284
LamPP	4	1	73.5	1.23457
LamPP	4	1	73.6	1.23457
LamPP	4	1	73.7	1.23457
LamPP	4	1	73.8	1.23457
LamPP	4	1	73.9	1.23457
LamPP	4	1	74	1.23457
LamPP	4	1	74.1	1.23457
LamPP	4	1	74.2	0.617284
LamPP	4	1	74.3	0.617284
LamPP	4	1	74.4	0.617284
LamPP	4	1	74.5	0.617284
LamPP	4	1	74.6	1.23457
LamPP	4	1	74.7	1.23457
LamPP	4	1	74.8	1.23457
LamPP	4	1	74.9	1.23457
LamPP	4	1	75	1.23457
LamPP	4	1	75.1	1.23457
LamPP	4	1	75.2	1.23457
LamPP	4	1	75.3	1.23457
LamPP	4	1	75.4	0.617284
LamPP	4	1	75.5	0.617284
LamPP	4	1	75.6	0.617284
LamPP	4	1	75.7	1.23457
LamPP	4	1	75.8	1.23457
LamPP	4	1	75.9	1.23457
LamPP	4	1	76	1.23457
LamPP	4	1	76.1	1.23457
LamPP	4	1	76.2	1.23457
LamPP	4	1	76.3	1.23457
LamPP	4	1	76.4	1.23457
LamPP	4	1	76.5	0.617284
LamPP	4	1	76.6	0.617284
LamPP	4	1	76.7	0.617284
LamPP	4	1	76.8	0.617284
LamPP	4	1	76.9	0.617284
LamPP	4	1	77	0.617284
LamPP	4	1	77.1	1.23457
LamPP	4	1	77.2	1.23457
LamPP	4	1	77.3	1.23457
LamPP	4	1	77.4	1.23457
LamPP	4	1	77.5	1.23457
LamPP	4	1	77.6	0.617284
LamPP	4	1	77.7	0.617284
LamPP	4	1	77.8	0.617284
LamPP	4	1	77.9	0.617284
LamPP	4	1	78	0.617284
LamPP	4	1	78.1	0.617284
LamPP	4	1	78.2	0.617284
LamPP	4	1	78.3	1.23457
LamPP	4	1	78.4	1.23457
LamPP	4	1	78.5	1.23457
LamPP	4	1	78.6	1.23457
LamPP	4	1	78.7	1.23457
LamPP	4	1	78.8	1.23457
LamPP	4	1	78.9	1.23457
LamPP	4	1	79	0.617284
LamPP	4	1	79.1	0.617284
LamPP	4	1	79.2	0.617284
LamPP	4	1	79.3	0.617284
LamPP	4	1	79.4	0.617284
LamPP	4	1	79.5	0.617284
LamPP	4	1	79.6	0.617284
LamPP	4	1	79.7	1.23457
LamPP	4	1	79.8	1.23457
LamPP	4	1	79.9	1.23457
LamPP	4	1	80	1.23457
LamPP	4	1	80.1	1.23457
LamPP	4	1	80.2	0.617284
LamPP	4	1	80.3	0.617284
LamPP	4	1	80.4	0.617284
LamPP	4	1	80.5	0.617284
LamPP	4	1	80.6	0.617284
LamPP	4	1	80.7	0.617284
LamPP	4	1	80.8	0.617284
LamPP	4	1	80.9	0.617284
LamPP	4	1	81	1.23457
LamPP	4	1	81.1	1.23457
LamPP	4	1	81.2	1.23457
LamPP	4	1	81.3	1.23457
LamPP	4	1	81.4	1.23457
LamPP	4	1	81.5	1.23457
LamPP	4	1	81.6	0.617284
LamPP	4	1	81.7	0.617284
LamPP	4	1	81.8	0.617284
LamPP	4	1	81.9	0.617284
LamPP	4	1	82	0.617284
LamPP	4	1	82.1	0.617284
LamPP	4	1	82.2	0.617284
LamPP	4	1	82.3	0.617284
LamPP	4	1	82.4	1.23457
LamPP	4	1	82.5	1.23457
LamPP	4	1	82.6	1.23457
LamPP	4	1	82.7	1.23457
LamPP	4	1	82.8	1.23457
LamPP	4	1	82.9	0.617284
LamPP	4	1	83	0.617284
LamPP	4	1	83.1	0.617284
LamPP	4	1	83.2	0.617284
LamPP	4	1	83.3	0.617284
LamPP	4	1	83.4	0.617284
LamPP	4	1	83.5	0.617284
LamPP	4	1	83.6	0.617284
LamPP	4	1	83.7	1.23457
LamPP	4	1	83.8	1.23457
LamPP	4	1	83.9	1.23457
LamPP	4	1	84	1.23457
LamPP	4	1	84.1	1.23457
LamPP	4	1	84.2	1.23457
LamPP	4	1	84.3	0.617284
LamPP	4	1	84.4	0.617284
LamPP	4	1	84.5	0.617284
LamPP	4	1	84.6	0.617284
LamPP	4	1	84.7	0.617284
LamPP	4	1	84.8	0.617284
LamPP	4	1	84.9	0.617284
LamPP	4	1	85	1.23457
LamPP	4	1	85.1	1.23457
LamPP	4	1	85.2	1.23457
LamPP	4	1	85.3	1.23457
LamPP	4	1	85.4	1.23457
LamPP	4	1	85.5	1.23457
LamPP	4	1	85.6	0.617284
LamPP	4	1	85.7	0.617284
LamPP	4	1	85.8	0.617284
LamPP	4	1	85.9	0.617284
LamPP	4	1	86	0.617284
LamPP	4	1	86.1	0.617284
LamPP	4	1	86.2	0.617284
LamPP	4	1	86.3	0.617284
LamPP	4	1	86.4	1.23457
LamPP	4	1	86.5	1.23457
LamPP	4	1	86.6	1.23457
LamPP	4	1	86.7	1.23457
LamPP	4	1	86.8	1.23457
LamPP	4	1	86.9	0.617284
LamPP	4	1	87	0.617284
LamPP	4	1	87.1	0.617284
LamPP	4	1	87.2	0.617284
LamPP	4	1	87.3	0.617284
LamPP	4	1	87.4	0.617284
LamPP	4	1	87.5	0.617284
LamPP	4	1	87.6	0.617284
LamPP	4	1	87.7	0.617284
LamPP	4	1	87.8	1.23457
LamPP	4	1	87.9	1.23457
LamPP	4	1	88	1.23457
LamPP	4	1	88.1	1.23457
LamPP	4	1	88.2	1.23457
LamPP	4	1	88.3	0.617284
LamPP	4	1	88.4	0.617284
LamPP	4	1	88.5	0.617284
LamPP	4	1	88.6	0.617284
LamPP	4	1	88.7	0.617284
LamPP	4	1	88.8	0.617284
LamPP	4	1	88.9	0.617284
LamPP	4	1	89	0.617284
LamPP	4	1	89.1	1.23457
LamPP	4	1	89.2	1.23457
LamPP	4	1	89.3	1.23457
LamPP	4	1	89.4	1.23457
LamPP	4	1	89.5	1.23457
LamPP	4	1	89.6	1.23457
LamPP	4	1	89.7	0.617284
LamPP	4	1	89.8	0.617284
LamPP	4	1	89.9	0.617284
LamPP	4	1	90	0.617284
LamPP	4	2	0	1
LamPP	4	2	0.1	0
LamPP	4	2	0.2	0
LamPP	4	2	0.3	0.348432
LamPP	4	2	0.4	0
LamPP	4	2	0.5	0
LamPP	4	2	0.6	0
LamPP	4	2	0.7	0
LamPP	4	2	0.8	0.348432
LamPP	4	2	0.9	0
LamPP	4	2	1	1.39373
LamPP	4	2	1.1	1.39373
LamPP	4	2	1.2	1.0453
LamPP	4	2	1.3	1.0453
LamPP	4	2	1.4	1.0453
LamPP	4	2	1.5	1.39373
LamPP	4	2	1.6	1.39373
LamPP	4	2	1.7	1.0453
LamPP	4	2	1.8	1.0453
LamPP	4	2	1.9	1.0453
LamPP	4	2	2	1.0453
LamPP	4	2	2.1	0.696864
LamPP	4	2	2.2	0.696864
LamPP	4	2	2.3	1.0453
LamPP	4	2	2.4	1.0453
LamPP	4	2	2.5	1.0453
LamPP	4	2	2.6	1.0453
LamPP	4	2	2.7	1.0453
LamPP	4	2	2.8	0.696864
LamPP	4	2	2.9	1.0453
LamPP	4	2	3	1.0453
LamPP	4	2	3.1	1.0453
LamPP	4	2	3.2	1.0453
LamPP	4	2	3.3	1.39373
LamPP	4	2	3.4	1.0453
LamPP	4	2	3.5	1.0453
LamPP	4	2	3.6	1.0453
LamPP	4	2	3.7	1.0453
LamPP	4	2	3.8	1.0453
LamPP	4	2	3.9	1.0453
LamPP	4	2	4	1.0453
LamPP	4	2	4.1	1.0453
LamPP	4	2	4.2	0.696864
LamPP	4	2	4.3	1.0453
LamPP	4	2	4.4	1.0453
LamPP	4	2	4.5	1.0453
LamPP	4	2	4.6	1.39373
LamPP	4	2	4.7	1.39373
LamPP	4	2	4.8	1.0453
LamPP	4	2	4.9	1.0453
LamPP	4	2	5	1.0453
LamPP	4	2	5.1	1.0453
LamPP	4	2	5.2	0.696864
LamPP	4	2	5.3	1.0453
LamPP	4	2	5.4	1.0453
LamPP	4	2	5.5	1.0453
LamPP	4	2	5.6	1.0453
LamPP	4	2	5.7	1.0453
LamPP	4	2	5.8	1.0453
LamPP	4	2	5.9	1.0453
LamPP	4	2	6	1.39373
LamPP	4	2	6.1	1.39373
LamPP	4	2	6.2	1.0453
LamPP	4	2	6.3	1.0453
LamPP	4	2	6.4	1.39373
LamPP	4	2	6.5	1.0453
LamPP	4	2	6.6	1.0453
LamPP	4	2	6.7	1.39373
LamPP	4	2	6.8	1.39373
LamPP	4	2	6.9	1.39373
LamPP	4	2	7	1.39373
LamPP	4	2	7.1	1.74216
LamPP	4	2	7.2	1.39373
LamPP	4	2	7.3	1.39373
LamPP	4	2	7.4	1.39373
LamPP	4	2	7.5	1.39373
LamPP	4	2	7.6	1.39373
LamPP	4	2	7.7	1.39373
LamPP	4	2	7.8	1.39373
LamPP	4	2	7.9	1.0453
LamPP	4	2	8	1.0453
LamPP	4	2	8.1	1.39373
LamPP	4	2	8.2	1.39373
LamPP	4	2	8.3	1.0453
LamPP	4	2	8.4	1.0453
LamPP	4	2	8.5	1.0453
LamPP	4	2	8.6	0.696864
LamPP	4	2	8.7	1.0453
LamPP	4	2	8.8	1.0453
LamPP	4	2	8.9	1.0453
LamPP	4	2	9	0.696864
LamPP	4	2	9.1	0.696864
LamPP	4	2	9.2	0.696864
LamPP	4	2	9.3	0.696864
LamPP	4	2	9.4	0.696864
LamPP	4	2	9.5	0.696864
LamPP	4	2	9.6	1.0453
LamPP	4	2	9.7	1.0453
LamPP	4	2	9.8	1.0453
LamPP	4	2	9.9	1.0453
LamPP	4	2	10	0.696864
LamPP	4	2	10.1	0.696864
LamPP	4	2	10.2	0.696864
LamPP	4	2	10.3	0.696864
LamPP	4	2	10.4	0.696864
LamPP	4	2	10.5	0.696864
LamPP	4	2	10.6	0.348432
LamPP	4	2	10.7	0.348432
LamPP	4	2	10.8	0.348432
LamPP	4	2	10.9	0.348432
LamPP	4	2	11	0.348432
LamPP	4	2	11.1	0.348432
LamPP	4	2	11.2	0.348432
LamPP	4	2	11.3	0.348432
LamPP	4	2	11.4	0.348432
LamPP	4	2	11.5	0
LamPP	4	2	11.6	0
LamPP	4	2	11.7	0
LamPP	4	2	11.8	0
LamPP	4	2	11.9	0
LamPP	4	2	12	0
LamPP	4	2	12.1	0
LamPP	4	2	12.2	0
LamPP	4	2	12.3	0
LamPP	4	2	12.4	0.348432
LamPP	4	2	12.5	0.348432
LamPP	4	2	12.6	0.348432
LamPP	4	2	12.7	0.348432
LamPP	4	2	12.8	0.348432
LamPP	4	2	12.9	0.348432
LamPP	4	2	13	0.348432
LamPP	4	2	13.1	0.348432
LamPP	4	2	13.2	0.348432
LamPP	4	2	13.3	0.348432
LamPP	4	2	13.4	0.348432
LamPP	4	2	13.5	0.348432
LamPP	4	2	13.6	0.348432
LamPP	4	2	13.7	0.348432
LamPP	4	2	13.8	0.348432
LamPP	4	2	13.9	0.348432
LamPP	4	2	14	0.348432
LamPP	4	2	14.1	0.348432
LamPP	4	2	14.2	0.348432
LamPP	4	2	14.3	0
LamPP	4	2	14.4	0
LamPP	4	2	14.5	0
LamPP	4	2	14.6	0
LamPP	4	2	14.7	0
LamPP	4	2	14.8	0
LamPP	4	2	14.9	0
LamPP	4	2	15	0
LamPP	4	2	15.1	0
LamPP	4	2	15.2	0
LamPP	4	2	15.3	0
LamPP	4	2	15.4	0
LamPP	4	2	15.5	0
LamPP	4	2	15.6	0
LamPP	4	2	15.7	0
LamPP	4	2	15.8	0
LamPP	4	2	15.9	0
LamPP	4	2	16	0
LamPP	4	2	16.1	0
LamPP	4	2	16.2	0
LamPP	4	2	16.3	0
LamPP	4	2	16.4	0
LamPP	4	2	16.5	0
LamPP	4	2	16.6	0
LamPP	4	2	16.7	0
LamPP	4	2	16.8	0
LamPP	4	2	16.9	0
LamPP	4	2	17	0
LamPP	4	2	17.1	0
LamPP	4	2	17.2	0
LamPP	4	2	17.3	0
LamPP	4	2	17.4	0
LamPP	4	2	17.5	0
LamPP	4	2	17.6	0
LamPP	4	2	17.7	0
LamPP	4	2	17.8	0
LamPP	4	2	17.9	0
LamPP	4	2	18	0
LamPP	4	2	18.1	0
LamPP	4	2	18.2	0
LamPP	4	2	18.3	0
LamPP	4	2	18.4	0
LamPP	4	2	18.5	0
LamPP	4	2	18.6	0
LamPP	4	2	18.7	0
LamPP	4	2	18.8	0
LamPP	4	2	18.9	0.348432
LamPP	4	2	19	0.348432
LamPP	4	2	19.1	0.348432
LamPP	4	2	19.2	0.348432
LamPP	4	2	19.3	0.348432
LamPP	4	2	19.4	0.348432
LamPP	4	2	19.5	0.348432
LamPP	4	2	19.6	0.348432
LamPP	4	2	19.7	0.348432
LamPP	4	2	19.8	0.348432
LamPP	4	2	19.9	0.348432
LamPP	4	2	20	0.348432
LamPP	4	2	20.1	0.348432
LamPP	4	2	20.2	0.348432
LamPP	4	2	20.3	0.348432
LamPP	4	2	20.4	0.348432
LamPP	4	2	20.5	0.348432
LamPP	4	2	20.6	0.348432
LamPP	4	2	20.7	0.348432
LamPP	4	2	20.8	0
LamPP	4	2	20.9	0
LamPP	4	2	21	0.348432
LamPP	4	2	21.1	0.348432
LamPP	4	2	21.2	0.348432
LamPP	4	2	21.3	0.348432
LamPP	4	2	21.4	0.348432
LamPP	4	2	21.5	0.348432
LamPP	4	2	21.6	0.348432
LamPP	4	2	21.7	0.348432
LamPP	4	2	21.8	0.348432
LamPP	4	2	21.9	0.348432
LamPP	4	2	22	0.348432
LamPP	4	2	22.1	0.348432
LamPP	4	2	22.2	0.348432
LamPP	4	2	22.3	0.348432
LamPP	4	2	22.4	0.348432
LamPP	4	2	22.5	0.348432
LamPP	4	2	22.6	0.348432
LamPP	4	2	22.7	0.348432
LamPP	4	2	22.8	0.348432
LamPP	4	2	22.9	0
LamPP	4	2	23	0
LamPP	4	2	23.1	0
LamPP	4	2	23.2	0
LamPP	4	2	23.3	0
LamPP	4	2	23.4	0
LamPP	4	2	23.5	0
LamPP	4	2	23.6	0
LamPP	4	2	23.7	0
LamPP	4	2	23.8	0
LamPP	4	2	23.9	0
LamPP	4	2	24	0
LamPP	4	2	24.1	0
LamPP	4	2	24.2	0
LamPP	4	2	24.3	0
LamPP	4	2	24.4	0
LamPP	4	2	24.5	0
LamPP	4	2	24.6	0
LamPP	4	2	24.7	0
LamPP	4	2	24.8	0
LamPP	4	2	24.9	0
LamPP	4	2	25	0
LamPP	4	2	25.1	0
LamPP	4	2	25.2	0
LamPP	4	2	25.3	0
LamPP	4	2	25.4	0
LamPP	4	2	25.5	0
LamPP	4	2	25.6	0
LamPP	4	2	25.7	0
LamPP	4	2	25.8	0
LamPP	4	2	25.9	0
LamPP	4	2	26	0
LamPP	4	2	26.1	0
LamPP	4	2	26.2	0
LamPP	4	2	26.3	0
LamPP	4	2	26.4	0
LamPP	4	2	26.5	0
LamPP	4	2	26.6	0
LamPP	4	2	26.7	0
LamPP	4	2	26.8	0
LamPP	4	2	26.9	0
LamPP	4	2	27	0
LamPP	4	2	27.1	0
LamPP	4	2	27.2	0
LamPP	4	2	27.3	0
LamPP	4	2	27.4	0
LamPP	4	2	27.5	0
LamPP	4	2	27.6	0
LamPP	4	2	27.7	0
LamPP	4	2	27.8	0.348432
LamPP	4	2	27.9	0.348432
LamPP	4	2	28	0.348432
LamPP	4	2	28.1	0.348432
LamPP	4	2	28.2	0.348432
LamPP	4	2	28.3	0.348432
LamPP	4	2	28.4	0.348432
LamPP	4	2	28.5	0.348432
LamPP	4	2	28.6	0.348432
LamPP	4	2	28.7	0.348432
LamPP	4	2	28.8	0.348432
LamPP	4	2	28.9	0.348432
LamPP	4	2	29	0.348432
LamPP	4	2	29.1	0.348432
LamPP	4	2	29.2	0.348432
LamPP	4	2	29.3	0.348432
LamPP	4	2	29.4	0.348432
LamPP	4	2	29.5	0.348432
LamPP	4	2	29.6	0.348432
LamPP	4	2	29.7	0
LamPP	4	2	29.8	0
LamPP	4	2	29.9	0
LamPP	4	2	30	0
LamPP	4	2	30.1	0
LamPP	4	2	30.2	0
LamPP	4	2	30.3	0
LamPP	4	2	30.4	0
LamPP	4	2	30.5	0
LamPP	4	2	30.6	0
LamPP	4	2	30.7	0
LamPP	4	2	30.8	0
LamPP	4	2	30.9	0
LamPP	4	2	31	0
LamPP	4	2	31.1	0
LamPP	4	2	31.2	0
LamPP	4	2	31.3	0
LamPP	4	2	31.4	0
LamPP	4	2	31.5	0
LamPP	4	2	31.6	0
LamPP	4	2	31.7	0
LamPP	4	2	31.8	0
LamPP	4	2	31.9	0
LamPP	4	2	32	0
LamPP	4	2	32.1	0
LamPP	4	2	32.2	0
LamPP	4	2	32.3	0
LamPP	4	2	32.4	0
LamPP	4	2	32.5	0.348432
LamPP	4	2	32.6	0.348432
LamPP	4	2	32.7	0.348432
LamPP	4	2	32.8	0.348432
LamPP	4	2	32.9	0.348432
LamPP	4	2	33	0.348432
LamPP	4	2	33.1	0.348432
LamPP	4	2	33.2	0.348432
LamPP	4	2	33.3	0.348432
LamPP	4	2	33.4	0.348432
LamPP	4	2	33.5	0.348432
LamPP	4	2	33.6	0.348432
LamPP	4	2	33.7	0.348432
LamPP	4	2	33.8	0.348432
LamPP	4	2	33.9	0.348432
LamPP	4	2	34	0.348432
LamPP	4	2	34.1	0.348432
LamPP	4	2	34.2	0.348432
LamPP	4	2	34.3	0.348432
LamPP	4	2	34.4	0.348432
LamPP	4	2	34.5	0.348432
LamPP	4	2	34.6	0.348432
LamPP	4	2	34.7	0.348432
LamPP	4	2	34.8	0.348432
LamPP	4	2	34.9	0.348432
LamPP	4	2	35	0.348432
LamPP	4	2	35.1	0.348432
LamPP	4	2	35.2	0.348432
LamPP	4	2	35.3	0.348432
LamPP	4	2	35.4	0.348432
LamPP	4	2	35.5	0.348432
LamPP	4	2	35.6	0.348432
LamPP	4	2	35.7	0.348432
LamPP	4	2	35.8	0.348432
LamPP	4	2	35.9	0.348432
LamPP	4	2	36	0.348432
LamPP	4	2	36.1	0.348432
LamPP	4	2	36.2	0.348432
LamPP	4	2	36.3	0
LamPP	4	2	36.4	0
LamPP	4	2	36.5	0
LamPP	4	2	36.6	0
LamPP	4	2	36.7	0.348432
LamPP	4	2	36.8	0.348432
LamPP	4	2	36.9	0.348432
LamPP	4	2	37	0.348432
LamPP	4	2	37.1	0.348432
LamPP	4	2	37.2	0.348432
LamPP	4	2	37.3	0.348432
LamPP	4	2	37.4	0.348432
LamPP	4	2	37.5	0.348432
LamPP	4	2	37.6	0.348432
LamPP	4	2	37.7	0.348432
LamPP	4	2	37.8	0.348432
LamPP	4	2	37.9	0.348432
LamPP	4	2	38	0.348432
LamPP	4	2	38.1	0.348432
LamPP	4	2	38.2	0.348432
LamPP	4	2	38.3	0.348432
LamPP	4	2	38.4	0.348432
LamPP	4	2	38.5	0.348432
LamPP	4	2	38.6	0
LamPP	4	2	38.7	0
LamPP	4	2	38.8	0.348432
LamPP	4	2	38.9	0.348432
LamPP	4	2	39	0.348432
LamPP	4	2	39.1	0.348432
LamPP	4	2	39.2	0.348432
LamPP	4	2	39.3	0.348432
LamPP	4	2	39.4	0.348432
LamPP	4	2	39.5	0.348432
LamPP	4	2	39.6	0.348432
LamPP	4	2	39.7	0.348432
LamPP	4	2	39.8	0.348432
LamPP	4	2	39.9	0.348432
LamPP	4	2	40	0.348432
LamPP	4	2	40.1	0.348432
LamPP	4	2	40.2	0.348432
LamPP	4	2	40.3	0.348432
LamPP	4	2	40.4	0.348432
LamPP	4	2	40.5	0.348432
LamPP	4	2	40.6	0.696864
LamPP	4	2	40.7	0.348432
LamPP	4	2	40.8	0.348432
LamPP	4	2	40.9	0.348432
LamPP	4	2	41	0.348432
LamPP	4	2	41.1	0.348432
LamPP	4	2	41.2	0.348432
LamPP	4	2	41.3	0.348432
LamPP	4	2	41.4	0.348432
LamPP	4	2	41.5	0.348432
LamPP	4	2	41.6	0.348432
LamPP	4	2	41.7	0.348432
LamPP	4	2	41.8	0.348432
LamPP	4	2	41.9	0.348432
LamPP	4	2	42	0.348432
LamPP	4	2	42.1	0.348432
LamPP	4	2	42.2	0.348432
LamPP	4	2	42.3	0.348432
LamPP	4	2	42.4	0.696864
LamPP	4	2	42.5	0.348432
LamPP	4	2	42.6	0.348432
LamPP	4	2	42.7	0.348432
LamPP	4	2	42.8	0.348432
LamPP	4	2	42.9	0.348432
LamPP	4	2	43	0.348432
LamPP	4	2	43.1	0.348432
LamPP	4	2	43.2	0.348432
LamPP	4	2	43.3	0.348432
LamPP	4	2	43.4	0.348432
LamPP	4	2	43.5	0.696864
LamPP	4	2	43.6	0.696864
LamPP	4	2	43.7	0.696864
LamPP	4	2	43.8	0.696864
LamPP	4	2	43.9	0.696864
LamPP	4	2	44	0.696864
LamPP	4	2	44.1	0.696864
LamPP	4	2	44.2	0.696864
LamPP	4	2	44.3	0.348432
LamPP	4	2	44.4	0.348432
LamPP	4	2	44.5	0.348432
LamPP	4	2	44.6	0.348432
LamPP	4	2	44.7	0.348432
LamPP	4	2	44.8	0.696864
LamPP	4	2	44.9	0.696864
LamPP	4	2	45	0.696864
LamPP	4	2	45.1	0.696864
LamPP	4	2	45.2	0.696864
LamPP	4	2	45.3	0.696864
LamPP	4	2	45.4	0.348432
LamPP	4	2	45.5	0.348432
LamPP	4	2	45.6	0.348432
LamPP	4	2	45.7	0.348432
LamPP	4	2	45.8	0.348432
LamPP	4	2	45.9	0.348432
LamPP	4	2	46	0.348432
LamPP	4	2	46.1	0.696864
LamPP	4	2	46.2	0.696864
LamPP	4	2	46.3	0.696864
LamPP	4	2	46.4	0.696864
LamPP	4	2	46.5	0.696864
LamPP	4	2	46.6	0.696864
LamPP	4	2	46.7	0.348432
LamPP	4	2	46.8	0.348432
LamPP	4	2	46.9	0.348432
LamPP	4	2	47	0.348432
LamPP	4	2	47.1	0.348432
LamPP	4	2	47.2	0.696864
LamPP	4	2	47.3	0.696864
LamPP	4	2	47.4	0.696864
LamPP	4	2	47.5	0.696864
LamPP	4	2	47.6	0.696864
LamPP	4	2	47.7	0.696864
LamPP	4	2	47.8	1.0453
LamPP	4	2	47.9	1.0453
LamPP	4	2	48	0.696864
LamPP	4	2	48.1	0.696864
LamPP	4	2	48.2	0.696864
LamPP	4	2	48.3	0.696864
LamPP	4	2	48.4	0.696864
LamPP	4	2	48.5	0.696864
LamPP	4	2	48.6	0.696864
LamPP	4	2	48.7	0.696864
LamPP	4	2	48.8	0.696864
LamPP	4	2	48.9	1.0453
LamPP	4	2	49	1.0453
LamPP	4	2	49.1	0.696864
LamPP	4	2	49.2	0.696864
LamPP	4	2	49.3	0.696864
LamPP	4	2	49.4	0.696864
LamPP	4	2	49.5	0.696864
LamPP	4	2	49.6	0.696864
LamPP	4	2	49.7	0.348432
LamPP	4	2	49.8	0.348432
LamPP	4	2	49.9	0.348432
LamPP	4	2	50	0.348432
LamPP	4	2	50.1	0.348432
LamPP	4	2	50.2	0.348432
LamPP	4	2	50.3	0.348432
LamPP	4	2	50.4	0.348432
LamPP	4	2	50.5	0.348432
LamPP	4	2	50.6	0.696864
LamPP	4	2	50.7	0.696864
LamPP	4	2	50.8	0.348432
LamPP	4	2	50.9	0.348432
LamPP	4	2	51	0.348432
LamPP	4	2	51.1	0.348432
LamPP	4	2	51.2	0.348432
LamPP	4	2	51.3	0.348432
LamPP	4	2	51.4	0.348432
LamPP	4	2	51.5	0.348432
LamPP	4	2	51.6	0.348432
LamPP	4	2	51.7	0.696864
LamPP	4	2	51.8	0.696864
LamPP	4	2	51.9	0.696864
LamPP	4	2	52	0.696864
LamPP	4	2	52.1	0.696864
LamPP	4	2	52.2	0.696864
LamPP	4	2	52.3	0.696864
LamPP	4	2	52.4	0.696864
LamPP	4	2	52.5	0.348432
LamPP	4	2	52.6	0.348432
LamPP	4	2	52.7	0.348432
LamPP	4	2	52.8	0.348432
LamPP	4	2	52.9	0.696864
LamPP	4	2	53	0.696864
LamPP	4	2	53.1	0.696864
LamPP	4	2	53.2	0.696864
LamPP	4	2	53.3	0.696864
LamPP	4	2	53.4	0.696864
LamPP	4	2	53.5	0.696864
LamPP	4	2	53.6	0.348432
LamPP	4	2	53.7	0.696864
LamPP	4	2	53.8	0.696864
LamPP	4	2	53.9	0.696864
LamPP	4	2	54	0.696864
LamPP	4	2	54.1	0.696864
LamPP	4	2	54.2	0.696864
LamPP	4	2	54.3	0.696864
LamPP	4	2	54.4	0.696864
LamPP	4	2	54.5	0.696864
LamPP	4	2	54.6	0.696864
LamPP	4	2	54.7	0.696864
LamPP	4	2	54.8	0.348432
LamPP	4	2	54.9	0.348432
LamPP	4	2	55	0.348432
LamPP	4	2	55.1	0.696864
LamPP	4	2	55.2	0.696864
LamPP	4	2	55.3	0.696864
LamPP	4	2	55.4	0.696864
LamPP	4	2	55.5	0.696864
LamPP	4	2	55.6	0.348432
LamPP	4	2	55.7	0.348432
LamPP	4	2	55.8	0.348432
LamPP	4	2	55.9	0.348432
LamPP	4	2	56	0.696864
LamPP	4	2	56.1	0.696864
LamPP	4	2	56.2	0.696864
LamPP	4	2	56.3	0.696864
LamPP	4	2	56.4	0.696864
LamPP	4	2	56.5	0.696864
LamPP	4	2	56.6	0.696864
LamPP	4	2	56.7	0.696864
LamPP	4	2	56.8	0.696864
LamPP	4	2	56.9	1.0453
LamPP	4	2	57	0.696864
LamPP	4	2	57.1	0.696864
LamPP	4	2	57.2	0.696864
LamPP	4	2	57.3	0.696864
LamPP	4	2	57.4	0.696864
LamPP	4	2	57.5	0.696864
LamPP	4	2	57.6	0.696864
LamPP	4	2	57.7	0.696864
LamPP	4	2	57.8	0.696864
LamPP	4	2	57.9	0.696864
LamPP	4	2	58	0.696864
LamPP	4	2	58.1	0.696864
LamPP	4	2	58.2	0.696864
LamPP	4	2	58.3	0.696864
LamPP	4	2	58.4	0.696864
LamPP	4	2	58.5	0.696864
LamPP	4	2	58.6	0.696864
LamPP	4	2	58.7	0.696864
LamPP	4	2	58.8	0.348432
LamPP	4	2	58.9	0.348432
LamPP	4	2	59	0.348432
LamPP	4	2	59.1	0.696864
LamPP	4	2	59.2	0.696864
LamPP	4	2	59.3	0.696864
LamPP	4	2	59.4	0.696864
LamPP	4	2	59.5	0.696864
LamPP	4	2	59.6	0.696864
LamPP	4	2	59.7	0.696864
LamPP	4	2	59.8	0.348432
LamPP	4	2	59.9	0.348432
LamPP	4	2	60	0.348432
LamPP	4	2	60.1	0.696864
LamPP	4	2	60.2	0.696864
LamPP	4	2	60.3	0.696864
LamPP	4	2	60.4	0.696864
LamPP	4	2	60.5	0.696864
LamPP	4	2	60.6	0.696864
LamPP	4	2	60.7	0.696864
LamPP	4	2	60.8	0.696864
LamPP	4	2	60.9	0.696864
LamPP	4	2	61	0.348432
LamPP	4	2	61.1	0.348432
LamPP	4	2	61.2	0.348432
LamPP	4	2	61.3	0.348432
LamPP	4	2	61.4	0.348432
LamPP	4	2	61.5	0.348432
LamPP	4	2	61.6	0.348432
LamPP	4	2	61.7	0.348432
LamPP	4	2	61.8	0.696864
LamPP	4	2	61.9	0.696864
LamPP	4	2	62	0.348432
LamPP	4	2	62.1	0.348432
LamPP	4	2	62.2	0.348432
LamPP	4	2	62.3	0.348432
LamPP	4	2	62.4	0.696864
LamPP	4	2	62.5	0.696864
LamPP	4	2	62.6	0.696864
LamPP	4	2	62.7	0.696864
LamPP	4	2	62.8	0.696864
LamPP	4	2	62.9	0.696864
LamPP	4	2	63	0.696864
LamPP	4	2	63.1	0.696864
LamPP	4	2	63.2	0.696864
LamPP	4	2	63.3	0.696864
LamPP	4	2	63.4	0.696864
LamPP	4	2	63.5	1.0453
LamPP	4	2	63.6	1.0453
LamPP	4	2	63.7	0.696864
LamPP	4	2	63.8	0.696864
LamPP	4	2	63.9	0.696864
LamPP	4	2	64	0.696864
LamPP	4	2	64.1	0.696864
LamPP	4	2	64.2	1.0453
LamPP	4	2	64.3	0.696864
LamPP	4	2	64.4	0.696864
LamPP	4	2	64.5	0.696864
LamPP	4	2	64.6	0.696864
LamPP	4	2	64.7	0.696864
LamPP	4	2	64.8	0.696864
LamPP	4	2	64.9	0.696864
LamPP	4	2	65	0.696864
LamPP	4	2	65.1	1.0453
LamPP	4	2	65.2	1.0453
LamPP	4	2	65.3	1.0453
LamPP	4	2	65.4	0.696864
LamPP	4	2	65.5	0.696864
LamPP	4	2	65.6	0.696864
LamPP	4	2	65.7	1.0453
LamPP	4	2	65.8	1.0453
LamPP	4	2	65.9	1.0453
LamPP	4	2	66	1.0453
LamPP	4	2	66.1	0.696864
LamPP	4	2	66.2	0.696864
LamPP	4	2	66.3	1.0453
LamPP	4	2	66.4	1.0453
LamPP	4	2	66.5	1.0453
LamPP	4	2	66.6	1.0453
LamPP	4	2	66.7	1.0453
LamPP	4	2	66.8	1.0453
LamPP	4	2	66.9	1.0453
LamPP	4	2	67	1.0453
LamPP	4	2	67.1	1.0453
LamPP	4	2	67.2	1.0453
LamPP	4	2	67.3	1.0453
LamPP	4	2	67.4	1.0453
LamPP	4	2	67.5	1.0453
LamPP	4	2	67.6	0.696864
LamPP	4	2	67.7	1.0453
LamPP	4	2	67.8	1.0453
LamPP	4	2	67.9	1.0453
LamPP	4	2	68	1.0453
LamPP	4	2	68.1	1.0453
LamPP	4	2	68.2	0.696864
LamPP	4	2	68.3	1.0453
LamPP	4	2	68.4	1.0453
LamPP	4	2	68.5	1.0453
LamPP	4	2	68.6	1.0453
LamPP	4	2	68.7	1.0453
LamPP	4	2	68.8	1.0453
LamPP	4	2	68.9	1.0453
LamPP	4	2	69	1.0453
LamPP	4	2	69.1	1.0453
LamPP	4	2	69.2	1.0453
LamPP	4	2	69.3	1.0453
LamPP	4	2	69.4	1.0453
LamPP	4	2	69.5	1.0453
LamPP	4	2	69.6	1.0453
LamPP	4	2	69.7	1.0453
LamPP	4	2	69.8	1.0453
LamPP	4	2	69.9	1.0453
LamPP	4	2	70	1.0453
LamPP	4	2	70.1	1.0453
LamPP	4	2	70.2	1.0453
LamPP	4	2	70.3	1.0453
LamPP	4	2	70.4	1.0453
LamPP	4	2	70.5	1.0453
LamPP	4	2	70.6	1.0453
LamPP	4	2	70.7	1.0453
LamPP	4	2	70.8	1.0453
LamPP	4	2	70.9	1.0453
LamPP	4	2	71	1.0453
LamPP	4	2	71.1	1.0453
LamPP	4	2	71.2	1.0453
LamPP	4	2	71.3	1.0453
LamPP	4	2	71.4	1.0453
LamPP	4	2	71.5	1.0453
LamPP	4	2	71.6	1.0453
LamPP	4	2	71.7	1.0453
LamPP	4	2	71.8	1.0453
LamPP	4	2	71.9	1.0453
LamPP	4	2	72	1.0453
LamPP	4	2	72.1	0.696864
LamPP	4	2	72.2	0.696864
LamPP	4	2	72.3	0.696864
LamPP	4	2	72.4	1.0453
LamPP	4	2	72.5	1.0453
LamPP	4	2	72.6	1.0453
LamPP	4	2	72.7	0.696864
LamPP	4	2	72.8	0.696864
LamPP	4	2	72.9	0.696864
LamPP	4	2	73	1.0453
LamPP	4	2	73.1	1.0453
LamPP	4	2	73.2	1.0453
LamPP	4	2	73.3	1.0453
LamPP	4	2	73.4	0.696864
LamPP	4	2	73.5	0.696864
LamPP	4	2	73.6	1.0453
LamPP	4	2	73.7	1.0453
LamPP	4	2	73.8	1.0453
LamPP	4	2	73.9	1.0453
LamPP	4	2	74	1.0453
LamPP	4	2	74.1	1.39373
LamPP	4	2	74.2	1.39373
LamPP	4	2	74.3	1.0453
LamPP	4	2	74.4	1.0453
LamPP	4	2	74.5	1.0453
LamPP	4	2	74.6	1.0453
LamPP	4	2	74.7	1.0453
LamPP	4	2	74.8	1.39373
LamPP	4	2	74.9	1.0453
LamPP	4	2	75	1.0453
LamPP	4	2	75.1	1.0453
LamPP	4	2	75.2	1.0453
LamPP	4	2	75.3	1.0453
LamPP	4	2	75.4	1.0453
LamPP	4	2	75.5	0.696864
LamPP	4	2	75.6	1.0453
LamPP	4	2	75.7	1.0453
LamPP	4	2	75.8	1.0453
LamPP	4	2	75.9	1.0453
LamPP	4	2	76	0.696864
LamPP	4	2	76.1	0.696864
LamPP	4	2	76.2	1.0453
LamPP	4	2	76.3	1.0453
LamPP	4	2	76.4	1.0453
LamPP	4	2	76.5	1.0453
LamPP	4	2	76.6	1.0453
LamPP	4	2	76.7	0.696864
LamPP	4	2	76.8	0.696864
LamPP	4	2	76.9	0.696864
LamPP	4	2	77	1.0453
LamPP	4	2	77.1	1.0453
LamPP	4	2	77.2	1.0453
LamPP	4	2	77.3	1.0453
LamPP	4	2	77.4	1.0453
LamPP	4	2	77.5	0.696864
LamPP	4	2	77.6	0.696864
LamPP	4	2	77.7	0.696864
LamPP	4	2	77.8	0.696864
LamPP	4	2	77.9	1.0453
LamPP	4	2	78	1.0453
LamPP	4	2	78.1	0.696864
LamPP	4	2	78.2	0.696864
LamPP	4	2	78.3	0.696864
LamPP	4	2	78.4	0.696864
LamPP	4	2	78.5	0.696864
LamPP	4	2	78.6	0.696864
LamPP	4	2	78.7	1.0453
LamPP	4	2	78.8	1.0453
LamPP	4	2	78.9	0.696864
LamPP	4	2	79	0.696864
LamPP	4	2	79.1	0.696864
LamPP	4	2	79.2	0.696864
LamPP	4	2	79.3	1.0453
LamPP	4	2	79.4	1.0453
LamPP	4	2	79.5	1.0453
LamPP	4	2	79.6	1.0453
LamPP	4	2	79.7	1.0453
LamPP	4	2	79.8	0.696864
LamPP	4	2	79.9	1.0453
LamPP	4	2	80	1.0453
LamPP	4	2	80.1	1.0453
LamPP	4	2	80.2	1.0453
LamPP	4	2	80.3	1.0453
LamPP	4	2	80.4	1.0453
LamPP	4	2	80.5	1.0453
LamPP	4	2	80.6	0.696864
LamPP	4	2	80.7	1.0453
LamPP	4	2	80.8	1.0453
LamPP	4	2	80.9	1.0453
LamPP	4	2	81	1.0453
LamPP	4	2	81.1	1.0453
LamPP	4	2	81.2	0.696864
LamPP	4	2	81.3	1.0453
LamPP	4	2	81.4	1.0453
LamPP	4	2	81.5	1.0453
LamPP	4	2	81.6	1.0453
LamPP	4	2	81.7	1.0453
LamPP	4	2	81.8	0.696864
LamPP	4	2	81.9	0.696864
LamPP	4	2	82	0.696864
LamPP	4	2	82.1	0.696864
LamPP	4	2	82.2	0.696864
LamPP	4	2	82.3	0.696864
LamPP	4	2	82.4	0.696864
LamPP	4	2	82.5	0.696864
LamPP	4	2	82.6	0.348432
LamPP	4	2	82.7	0.696864
LamPP	4	2	82.8	0.696864
LamPP	4	2	82.9	0.696864
LamPP	4	2	83	0.696864
LamPP	4	2	83.1	0.696864
LamPP	4	2	83.2	0.348432
LamPP	4	2	83.3	0.696864
LamPP	4	2	83.4	0.696864
LamPP	4	2	83.5	0.696864
LamPP	4	2	83.6	0.696864
LamPP	4	2	83.7	0.696864
LamPP	4	2	83.8	0.696864
LamPP	4	2	83.9	0.696864
LamPP	4	2	84	1.0453
LamPP	4	2	84.1	1.0453
LamPP	4	2	84.2	1.0453
LamPP	4	2	84.3	1.0453
LamPP	4	2	84.4	1.0453
LamPP	4	2	84.5	1.39373
LamPP	4	2	84.6	1.0453
LamPP	4	2	84.7	1.0453
LamPP	4	2	84.8	1.0453
LamPP	4	2	84.9	1.0453
LamPP	4	2	85	1.0453
LamPP	4	2	85.1	1.39373
LamPP	4	2	85.2	1.0453
LamPP	4	2	85.3	1.0453
LamPP	4	2	85.4	1.0453
LamPP	4	2	85.5	1.0453
LamPP	4	2	85.6	1.0453
LamPP	4	2	85.7	1.0453
LamPP	4	2	85.8	1.0453
LamPP	4	2	85.9	1.0453
LamPP	4	2	86	1.0453
LamPP	4	2	86.1	1.0453
LamPP	4	2	86.2	1.0453
LamPP	4	2	86.3	1.0453
LamPP	4	2	86.4	0.696864
LamPP	4	2	86.5	0.696864
LamPP	4	2	86.6	1.0453
LamPP	4	2	86.7	1.0453
LamPP	4	2	86.8	1.0453
LamPP	4	2	86.9	1.0453
LamPP	4	2	87	0.696864
LamPP	4	2	87.1	0.696864
LamPP	4	2	87.2	1.0453
LamPP	4	2	87.3	1.0453
LamPP	4	2	87.4	1.0453
LamPP	4	2	87.5	1.0453
LamPP	4	2	87.6	1.0453
LamPP	4	2	87.7	1.0453
LamPP	4	2	87.8	0.696864
LamPP	4	2	87.9	1.0453
LamPP	4	2	88	1.0453
LamPP	4	2	88.1	1.0453
LamPP	4	2	88.2	1.0453
LamPP	4	2	88.3	1.0453
LamPP	4	2	88.4	1.0453
LamPP	4	2	88.5	1.0453
LamPP	4	2	88.6	1.0453
LamPP	4	2	88.7	1.0453
LamPP	4	2	88.8	1.0453
LamPP	4	2	88.9	1.0453
LamPP	4	2	89	1.0453
LamPP	4	2	89.1	1.0453
LamPP	4	2	89.2	1.0453
LamPP	4	2	89.3	1.0453
LamPP	4	2	89.4	1.0453
LamPP	4	2	89.5	1.0453
LamPP	4	2	89.6	1.39373
LamPP	4	2	89.7	1.39373
LamPP	4	2	89.8	1.0453
LamPP	4	2	89.9	1.0453
LamPP	4	2	90	1.0453
LamPP	4	3	0	1
LamPP	4	3	0.1	0
LamPP	4	3	0.2	0
LamPP	4	3	0.3	0
LamPP	4	3	0.4	0
LamPP	4	3	0.5	0
LamPP	4	3	0.6	0
LamPP	4	3	0.7	0
LamPP	4	3	0.8	0
LamPP	4	3	0.9	0
LamPP	4	3	1	0.887574
LamPP	4	3	1.1	0.887574
LamPP	4	3	1.2	0.887574
LamPP	4	3	1.3	1.18343
LamPP	4	3	1.4	1.18343
LamPP	4	3	1.5	1.18343
LamPP	4	3	1.6	1.18343
LamPP	4	3	1.7	1.18343
LamPP	4	3	1.8	1.18343
LamPP	4	3	1.9	1.47929
LamPP	4	3	2	1.47929
LamPP	4	3	2.1	1.18343
LamPP	4	3	2.2	1.47929
LamPP	4	3	2.3	1.47929
LamPP	4	3	2.4	1.18343
LamPP	4	3	2.5	1.18343
LamPP	4	3	2.6	1.18343
LamPP	4	3	2.7	1.47929
LamPP	4	3	2.8	1.47929
LamPP	4	3	2.9	1.18343
LamPP	4	3	3	1.18343
LamPP	4	3	3.1	1.18343
LamPP	4	3	3.2	0.887574
LamPP	4	3	3.3	0.887574
LamPP	4	3	3.4	0.887574
LamPP	4	3	3.5	0.887574
LamPP	4	3	3.6	0.887574
LamPP	4	3	3.7	0.887574
LamPP	4	3	3.8	0.591716
LamPP	4	3	3.9	0.887574
LamPP	4	3	4	0.887574
LamPP	4	3	4.1	0.591716
LamPP	4	3	4.2	0.591716
LamPP	4	3	4.3	0.591716
LamPP	4	3	4.4	0.591716
LamPP	4	3	4.5	0.887574
LamPP	4	3	4.6	0.591716
LamPP	4	3	4.7	0.591716
LamPP	4	3	4.8	0.887574
LamPP	4	3	4.9	0.887574
LamPP	4	3	5	0.887574
LamPP	4	3	5.1	1.18343
LamPP	4	3	5.2	1.18343
LamPP	4	3	5.3	1.18343
LamPP	4	3	5.4	1.47929
LamPP	4	3	5.5	1.47929
LamPP	4	3	5.6	1.47929
LamPP	4	3	5.7	1.47929
LamPP	4	3	5.8	1.18343
LamPP	4	3	5.9	1.18343
LamPP	4	3	6	1.47929
LamPP	4	3	6.1	1.47929
LamPP	4	3	6.2	1.47929
LamPP	4	3	6.3	1.77515
LamPP	4	3	6.4	1.47929
LamPP	4	3	6.5	1.47929
LamPP	4	3	6.6	1.47929
LamPP	4	3	6.7	1.18343
LamPP	4	3	6.8	1.18343
LamPP	4	3	6.9	1.18343
LamPP	4	3	7	0.887574
LamPP	4	3	7.1	1.18343
LamPP	4	3	7.2	1.18343
LamPP	4	3	7.3	0.887574
LamPP	4	3	7.4	1.18343
LamPP	4	3	7.5	1.18343
LamPP	4	3	7.6	1.18343
LamPP	4	3	7.7	1.18343
LamPP	4	3	7.8	1.18343
LamPP	4	3	7.9	0.887574
LamPP	4	3	8	1.18343
LamPP	4	3	8.1	1.18343
LamPP	4	3	8.2	0.887574
LamPP	4	3	8.3	0.887574
LamPP	4	3	8.4	0.887574
LamPP	4	3	8.5	0.887574
LamPP	4	3	8.6	0.887574
LamPP	4	3	8.7	0.887574
LamPP	4	3	8.8	1.18343
LamPP	4	3	8.9	1.18343
LamPP	4	3	9	0.887574
LamPP	4	3	9.1	0.887574
LamPP	4	3	9.2	1.18343
LamPP	4	3	9.3	0.887574
LamPP	4	3	9.4	0.887574
LamPP	4	3	9.5	1.18343
LamPP	4	3	9.6	1.18343
LamPP	4	3	9.7	1.18343
LamPP	4	3	9.8	1.18343
LamPP	4	3	9.9	0.887574
LamPP	4	3	10	0.887574
LamPP	4	3	10.1	0.887574
LamPP	4	3	10.2	0.887574
LamPP	4	3	10.3	0.887574
LamPP	4	3	10.4	0.887574
LamPP	4	3	10.5	0.887574
LamPP	4	3	10.6	0.887574
LamPP	4	3	10.7	0.591716
LamPP	4	3	10.8	0.591716
LamPP	4	3	10.9	0.591716
LamPP	4	3	11	0.591716
LamPP	4	3	11.1	0.295858
LamPP	4	3	11.2	0.295858
LamPP	4	3	11.3	0.295858
LamPP	4	3	11.4	0
LamPP	4	3	11.5	0
LamPP	4	3	11.6	0
LamPP	4	3	11.7	0
LamPP	4	3	11.8	0
LamPP	4	3	11.9	0
LamPP	4	3	12	0
LamPP	4	3	12.1	0
LamPP	4	3	12.2	0
LamPP	4	3	12.3	0
LamPP	4	3	12.4	0
LamPP	4	3	12.5	0
LamPP	4	3	12.6	0
LamPP	4	3	12.7	0
LamPP	4	3	12.8	0
LamPP	4	3	12.9	0
LamPP	4	3	13	0
LamPP	4	3	13.1	0
LamPP	4	3	13.2	0
LamPP	4	3	13.3	0
LamPP	4	3	13.4	0
LamPP	4	3	13.5	0
LamPP	4	3	13.6	0
LamPP	4	3	13.7	0
LamPP	4	3	13.8	0
LamPP	4	3	13.9	0
LamPP	4	3	14	0
LamPP	4	3	14.1	0
LamPP	4	3	14.2	0
LamPP	4	3	14.3	0
LamPP	4	3	14.4	0
LamPP	4	3	14.5	0
LamPP	4	3	14.6	0
LamPP	4	3	14.7	0
LamPP	4	3	14.8	0
LamPP	4	3	14.9	0.295858
LamPP	4	3	15	0.295858
LamPP	4	3	15.1	0.295858
LamPP	4	3	15.2	0.295858
LamPP	4	3	15.3	0.295858
LamPP	4	3	15.4	0.295858
LamPP	4	3	15.5	0.295858
LamPP	4	3	15.6	0.295858
LamPP	4	3	15.7	0.295858
LamPP	4	3	15.8	0.295858
LamPP	4	3	15.9	0.295858
LamPP	4	3	16	0.295858
LamPP	4	3	16.1	0.295858
LamPP	4	3	16.2	0.295858
LamPP	4	3	16.3	0.295858
LamPP	4	3	16.4	0.295858
LamPP	4	3	16.5	0.295858
LamPP	4	3	16.6	0.295858
LamPP	4	3	16.7	0.295858
LamPP	4	3	16.8	0
LamPP	4	3	16.9	0.295858
LamPP	4	3	17	0.295858
LamPP	4	3	17.1	0.295858
LamPP	4	3	17.2	0.295858
LamPP	4	3	17.3	0.295858
LamPP	4	3	17.4	0.295858
LamPP	4	3	17.5	0.295858
LamPP	4	3	17.6	0.295858
LamPP	4	3	17.7	0.295858
LamPP	4	3	17.8	0.295858
LamPP	4	3	17.9	0.295858
LamPP	4	3	18	0.295858
LamPP	4	3	18.1	0.295858
LamPP	4	3	18.2	0.295858
LamPP	4	3	18.3	0.295858
LamPP	4	3	18.4	0.295858
LamPP	4	3	18.5	0.295858
LamPP	4	3	18.6	0.295858
LamPP	4	3	18.7	0.295858
LamPP	4	3	18.8	0
LamPP	4	3	18.9	0
LamPP	4	3	19	0
LamPP	4	3	19.1	0
LamPP	4	3	19.2	0.295858
LamPP	4	3	19.3	0.295858
LamPP	4	3	19.4	0.295858
LamPP	4	3	19.5	0.295858
LamPP	4	3	19.6	0.295858
[truncated: 14,219 more rows]
