# Supplementary material for: Optogenetic manipulation of Gq- and Gi/o-coupled receptor signaling in neurons and heart muscle cells
Source: eLife. 2023 Aug 17;12:e83974. doi: 10.7554/eLife.83974 (PMC10435233; doi:10.7554/eLife.83974)
Supplement: Figure 5—source data 1. [file elife-83974-fig5-data1.xlsx]

## Sheet: A
Line	Sample_number	Range	Frame	X	Y
MosOpn3	1	Ventricle	1	-5	0
MosOpn3	1	Ventricle	2	-4.88889	0
MosOpn3	1	Ventricle	3	-4.77778	0
MosOpn3	1	Ventricle	4	-4.66667	0
MosOpn3	1	Ventricle	5	-4.55556	0
MosOpn3	1	Ventricle	6	-4.44444	0
MosOpn3	1	Ventricle	7	-4.33333	0
MosOpn3	1	Ventricle	8	-4.22222	0
MosOpn3	1	Ventricle	9	-4.11111	0
MosOpn3	1	Ventricle	10	-4	0
MosOpn3	1	Ventricle	11	-3.88889	0
MosOpn3	1	Ventricle	12	-3.77778	0
MosOpn3	1	Ventricle	13	-3.66667	0
MosOpn3	1	Ventricle	14	-3.55556	0
MosOpn3	1	Ventricle	15	-3.44444	0
MosOpn3	1	Ventricle	16	-3.33333	0
MosOpn3	1	Ventricle	17	-3.22222	0
MosOpn3	1	Ventricle	18	-3.11111	0
MosOpn3	1	Ventricle	19	-3	0
MosOpn3	1	Ventricle	20	-2.88889	0
MosOpn3	1	Ventricle	21	-2.77778	0
MosOpn3	1	Ventricle	22	-2.66667	0
MosOpn3	1	Ventricle	23	-2.55556	0
MosOpn3	1	Ventricle	24	-2.44444	0
MosOpn3	1	Ventricle	25	-2.33333	0
MosOpn3	1	Ventricle	26	-2.22222	0
MosOpn3	1	Ventricle	27	-2.11111	0
MosOpn3	1	Ventricle	28	-2	0
MosOpn3	1	Ventricle	29	-1.88889	0
MosOpn3	1	Ventricle	30	-1.77778	0
MosOpn3	1	Ventricle	31	-1.66667	0
MosOpn3	1	Ventricle	32	-1.55556	0
MosOpn3	1	Ventricle	33	-1.44444	0
MosOpn3	1	Ventricle	34	-1.33333	0
MosOpn3	1	Ventricle	35	-1.22222	0
MosOpn3	1	Ventricle	36	-1.11111	0
MosOpn3	1	Ventricle	37	-1	0
MosOpn3	1	Ventricle	38	-0.888889	0
MosOpn3	1	Ventricle	39	-0.777778	0
MosOpn3	1	Ventricle	40	-0.666667	0
MosOpn3	1	Ventricle	41	-0.555556	0
MosOpn3	1	Ventricle	42	-0.444444	0
MosOpn3	1	Ventricle	43	-0.333333	0
MosOpn3	1	Ventricle	44	-0.222222	0
MosOpn3	1	Ventricle	45	-0.111111	0
MosOpn3	1	Ventricle	46	0	0
MosOpn3	1	Ventricle	47	0.111111	1.12076
MosOpn3	1	Ventricle	48	0.222222	1.12021
MosOpn3	1	Ventricle	49	0.333333	1.10527
MosOpn3	1	Ventricle	50	0.444444	1.09425
MosOpn3	1	Ventricle	51	0.555556	1.08497
MosOpn3	1	Ventricle	52	0.666667	1.06494
MosOpn3	1	Ventricle	53	0.777778	1.05207
MosOpn3	1	Ventricle	54	0.888889	1.04192
MosOpn3	1	Ventricle	55	1	1.01372
MosOpn3	1	Ventricle	56	1.11111	1.00244
MosOpn3	1	Ventricle	57	1.22222	0.988692
MosOpn3	1	Ventricle	58	1.33333	0.950054
MosOpn3	1	Ventricle	59	1.44444	0.958022
MosOpn3	1	Ventricle	60	1.55556	0.945428
MosOpn3	1	Ventricle	61	1.66667	0.901853
MosOpn3	1	Ventricle	62	1.77778	0.9257
MosOpn3	1	Ventricle	63	1.88889	0.899057
MosOpn3	1	Ventricle	64	2	0.83537
MosOpn3	1	Ventricle	65	2.11111	0.873252
MosOpn3	1	Ventricle	66	2.22222	0.844928
MosOpn3	1	Ventricle	67	2.33333	0.76854
MosOpn3	1	Ventricle	68	2.44444	0.826477
MosOpn3	1	Ventricle	69	2.55556	0.806734
MosOpn3	1	Ventricle	70	2.66667	0.73097
MosOpn3	1	Ventricle	71	2.77778	0.767585
MosOpn3	1	Ventricle	72	2.88889	0.779248
MosOpn3	1	Ventricle	73	3	0.702845
MosOpn3	1	Ventricle	74	3.11111	0.709566
MosOpn3	1	Ventricle	75	3.22222	0.752559
MosOpn3	1	Ventricle	76	3.33333	0.689863
MosOpn3	1	Ventricle	77	3.44444	0.668311
MosOpn3	1	Ventricle	78	3.55556	0.731456
MosOpn3	1	Ventricle	79	3.66667	0.690538
MosOpn3	1	Ventricle	80	3.77778	0.642404
MosOpn3	1	Ventricle	81	3.88889	0.702681
MosOpn3	1	Ventricle	82	4	0.693937
MosOpn3	1	Ventricle	83	4.11111	0.631482
MosOpn3	1	Ventricle	84	4.22222	0.654665
MosOpn3	1	Ventricle	85	4.33333	0.692403
MosOpn3	1	Ventricle	86	4.44444	0.63603
MosOpn3	1	Ventricle	87	4.55556	0.607833
MosOpn3	1	Ventricle	88	4.66667	0.676268
MosOpn3	1	Ventricle	89	4.77778	0.649411
MosOpn3	1	Ventricle	90	4.88889	0.595031
MosOpn3	1	Ventricle	91	5	0.639046
MosOpn3	1	Ventricle	92	5.11111	0.660471
MosOpn3	1	Ventricle	93	5.22222	0.603361
MosOpn3	1	Ventricle	94	5.33333	0.588709
MosOpn3	1	Ventricle	95	5.44444	0.656847
MosOpn3	1	Ventricle	96	5.55556	0.623718
MosOpn3	1	Ventricle	97	5.66667	0.573309
MosOpn3	1	Ventricle	98	5.77778	0.618939
MosOpn3	1	Ventricle	99	5.88889	0.644831
MosOpn3	1	Ventricle	100	6	0.591939
MosOpn3	1	Ventricle	101	6.11111	0.56296
MosOpn3	1	Ventricle	102	6.22222	0.639705
MosOpn3	1	Ventricle	103	6.33333	0.617922
MosOpn3	1	Ventricle	104	6.44444	0.564222
MosOpn3	1	Ventricle	105	6.55556	0.587068
MosOpn3	1	Ventricle	106	6.66667	0.639347
MosOpn3	1	Ventricle	107	6.77778	0.589296
MosOpn3	1	Ventricle	108	6.88889	0.543528
MosOpn3	1	Ventricle	109	7	0.60515
MosOpn3	1	Ventricle	110	7.11111	0.613844
MosOpn3	1	Ventricle	111	7.22222	0.560205
MosOpn3	1	Ventricle	112	7.33333	0.543268
MosOpn3	1	Ventricle	113	7.44444	0.615004
MosOpn3	1	Ventricle	114	7.55556	0.592409
MosOpn3	1	Ventricle	115	7.66667	0.54361
MosOpn3	1	Ventricle	116	7.77778	0.557277
MosOpn3	1	Ventricle	117	7.88889	0.613813
MosOpn3	1	Ventricle	118	8	0.573918
MosOpn3	1	Ventricle	119	8.11111	0.530628
MosOpn3	1	Ventricle	120	8.22222	0.576304
MosOpn3	1	Ventricle	121	8.33333	0.609029
MosOpn3	1	Ventricle	122	8.44444	0.560476
MosOpn3	1	Ventricle	123	8.55556	0.5215
MosOpn3	1	Ventricle	124	8.66667	0.585238
MosOpn3	1	Ventricle	125	8.77778	0.591617
MosOpn3	1	Ventricle	126	8.88889	0.542434
MosOpn3	1	Ventricle	127	9	0.516548
MosOpn3	1	Ventricle	128	9.11111	0.587543
MosOpn3	1	Ventricle	129	9.22222	0.574638
MosOpn3	1	Ventricle	130	9.33333	0.528282
MosOpn3	1	Ventricle	131	9.44444	0.515822
MosOpn3	1	Ventricle	132	9.55556	0.587441
MosOpn3	1	Ventricle	133	9.66667	0.559239
MosOpn3	1	Ventricle	134	9.77778	0.518638
MosOpn3	1	Ventricle	135	9.88889	0.521321
MosOpn3	1	Ventricle	136	10	0.586271
MosOpn3	1	Ventricle	137	10.1111	0.555212
MosOpn3	1	Ventricle	138	10.2222	0.510037
MosOpn3	1	Ventricle	139	10.3333	0.522768
MosOpn3	1	Ventricle	140	10.4444	0.582243
MosOpn3	1	Ventricle	141	10.5556	0.549656
MosOpn3	1	Ventricle	142	10.6667	0.505462
MosOpn3	1	Ventricle	143	10.7778	0.517969
MosOpn3	1	Ventricle	144	10.8889	0.575885
MosOpn3	1	Ventricle	145	11	0.54314
MosOpn3	1	Ventricle	146	11.1111	0.496038
MosOpn3	1	Ventricle	147	11.2222	0.507972
MosOpn3	1	Ventricle	148	11.3333	0.567544
MosOpn3	1	Ventricle	149	11.4444	0.534436
MosOpn3	1	Ventricle	150	11.5556	0.49201
MosOpn3	1	Ventricle	151	11.6667	0.498358
MosOpn3	1	Ventricle	152	11.7778	0.562561
MosOpn3	1	Ventricle	153	11.8889	0.534114
MosOpn3	1	Ventricle	154	12	0.488811
MosOpn3	1	Ventricle	155	12.1111	0.481104
MosOpn3	1	Ventricle	156	12.2222	0.550499
MosOpn3	1	Ventricle	157	12.3333	0.531773
MosOpn3	1	Ventricle	158	12.4444	0.488438
MosOpn3	1	Ventricle	159	12.5556	0.464182
MosOpn3	1	Ventricle	160	12.6667	0.533
MosOpn3	1	Ventricle	161	12.7778	0.535279
MosOpn3	1	Ventricle	162	12.8889	0.491361
MosOpn3	1	Ventricle	163	13	0.455033
MosOpn3	1	Ventricle	164	13.1111	0.514969
MosOpn3	1	Ventricle	165	13.2222	0.536128
MosOpn3	1	Ventricle	166	13.3333	0.494065
MosOpn3	1	Ventricle	167	13.4444	0.456531
MosOpn3	1	Ventricle	168	13.5556	0.485852
MosOpn3	1	Ventricle	169	13.6667	0.538244
MosOpn3	1	Ventricle	170	13.7778	0.50283
MosOpn3	1	Ventricle	171	13.8889	0.460727
MosOpn3	1	Ventricle	172	14	0.450352
MosOpn3	1	Ventricle	173	14.1111	0.519297
MosOpn3	1	Ventricle	174	14.2222	0.507353
MosOpn3	1	Ventricle	175	14.3333	0.468045
MosOpn3	1	Ventricle	176	14.4444	0.431344
MosOpn3	1	Ventricle	177	14.5556	0.488249
MosOpn3	1	Ventricle	178	14.6667	0.516962
MosOpn3	1	Ventricle	179	14.7778	0.47634
MosOpn3	1	Ventricle	180	14.8889	0.438366
MosOpn3	1	Ventricle	181	15	0.440523
MosOpn3	1	Ventricle	182	15.1111	0.510476
MosOpn3	1	Ventricle	183	15.2222	0.490661
MosOpn3	1	Ventricle	184	15.3333	0.450208
MosOpn3	1	Ventricle	185	15.4444	0.415833
MosOpn3	1	Ventricle	186	15.5556	0.459986
MosOpn3	1	Ventricle	187	15.6667	0.503786
MosOpn3	1	Ventricle	188	15.7778	0.466906
MosOpn3	1	Ventricle	189	15.8889	0.431804
MosOpn3	1	Ventricle	190	16	0.397428
MosOpn3	1	Ventricle	191	16.1111	0.461974
MosOpn3	1	Ventricle	192	16.2222	0.488009
MosOpn3	1	Ventricle	193	16.3333	0.45074
MosOpn3	1	Ventricle	194	16.4444	0.412889
MosOpn3	1	Ventricle	195	16.5556	0.381477
MosOpn3	1	Ventricle	196	16.6667	0.435433
MosOpn3	1	Ventricle	197	16.7778	0.473412
MosOpn3	1	Ventricle	198	16.8889	0.441351
MosOpn3	1	Ventricle	199	17	0.405953
MosOpn3	1	Ventricle	200	17.1111	0.372037
MosOpn3	1	Ventricle	201	17.2222	0.348006
MosOpn3	1	Ventricle	202	17.3333	0.415843
MosOpn3	1	Ventricle	203	17.4444	0.444975
MosOpn3	1	Ventricle	204	17.5556	0.412567
MosOpn3	1	Ventricle	205	17.6667	0.378825
MosOpn3	1	Ventricle	206	17.7778	0.347336
MosOpn3	1	Ventricle	207	17.8889	0.319232
MosOpn3	1	Ventricle	208	18	0.293994
MosOpn3	1	Ventricle	209	18.1111	0.27056
MosOpn3	1	Ventricle	210	18.2222	0.249647
MosOpn3	1	Ventricle	211	18.3333	0.230956
MosOpn3	1	Ventricle	212	18.4444	0.212772
MosOpn3	1	Ventricle	213	18.5556	0.196253
MosOpn3	1	Ventricle	214	18.6667	0.183875
MosOpn3	1	Ventricle	215	18.7778	0.170627
MosOpn3	1	Ventricle	216	18.8889	0.15991
MosOpn3	1	Ventricle	217	19	0.150914
MosOpn3	1	Ventricle	218	19.1111	0.141301
MosOpn3	1	Ventricle	219	19.2222	0.133292
MosOpn3	1	Ventricle	220	19.3333	0.125641
MosOpn3	1	Ventricle	221	19.4444	0.120224
MosOpn3	1	Ventricle	222	19.5556	0.114596
MosOpn3	1	Ventricle	223	19.6667	0.108918
MosOpn3	1	Ventricle	224	19.7778	0.103996
MosOpn3	1	Ventricle	225	19.8889	0.099918
MosOpn3	1	Ventricle	226	20	0.0959059
MosOpn3	1	Ventricle	227	20.1111	0.0921392
MosOpn3	1	Ventricle	228	20.2222	0.0888018
MosOpn3	1	Ventricle	229	20.3333	0.0859295
MosOpn3	1	Ventricle	230	20.4444	0.0832156
MosOpn3	1	Ventricle	231	20.5556	0.0804864
MosOpn3	1	Ventricle	232	20.6667	0.0773483
MosOpn3	1	Ventricle	233	20.7778	0.0757281
MosOpn3	1	Ventricle	234	20.8889	0.072958
MosOpn3	1	Ventricle	235	21	0.070745
MosOpn3	1	Ventricle	236	21.1111	0.0692526
MosOpn3	1	Ventricle	237	21.2222	0.0674025
MosOpn3	1	Ventricle	238	21.3333	0.0661299
MosOpn3	1	Ventricle	239	21.4444	0.0650975
MosOpn3	1	Ventricle	240	21.5556	0.063232
MosOpn3	1	Ventricle	241	21.6667	0.0617192
MosOpn3	1	Ventricle	242	21.7778	0.0605539
MosOpn3	1	Ventricle	243	21.8889	0.0595675
MosOpn3	1	Ventricle	244	22	0.0584891
MosOpn3	1	Ventricle	245	22.1111	0.0565367
MosOpn3	1	Ventricle	246	22.2222	0.0557496
MosOpn3	1	Ventricle	247	22.3333	0.0549268
MosOpn3	1	Ventricle	248	22.4444	0.053368
MosOpn3	1	Ventricle	249	22.5556	0.0524633
MosOpn3	1	Ventricle	250	22.6667	0.0514411
MosOpn3	1	Ventricle	251	22.7778	0.0509147
MosOpn3	1	Ventricle	252	22.8889	0.0496063
MosOpn3	1	Ventricle	253	23	0.0488806
MosOpn3	1	Ventricle	254	23.1111	0.047654
MosOpn3	1	Ventricle	255	23.2222	0.0469282
MosOpn3	1	Ventricle	256	23.3333	0.0457885
MosOpn3	1	Ventricle	257	23.4444	0.045349
MosOpn3	1	Ventricle	258	23.5556	0.0442143
MosOpn3	1	Ventricle	259	23.6667	0.0441326
MosOpn3	1	Ventricle	260	23.7778	0.0432228
MosOpn3	1	Ventricle	261	23.8889	0.0427628
MosOpn3	1	Ventricle	262	24	0.0412858
MosOpn3	1	Ventricle	263	24.1111	0.0413267
MosOpn3	1	Ventricle	264	24.2222	0.0405805
MosOpn3	1	Ventricle	265	24.3333	0.0390523
MosOpn3	1	Ventricle	266	24.4444	0.0385668
MosOpn3	1	Ventricle	267	24.5556	0.0382039
MosOpn3	1	Ventricle	268	24.6667	0.0380148
MosOpn3	1	Ventricle	269	24.7778	0.0370846
MosOpn3	1	Ventricle	270	24.8889	0.036916
MosOpn3	1	Ventricle	271	25	0.0365071
MosOpn3	1	Ventricle	272	25.1111	0.0362516
MosOpn3	1	Ventricle	273	25.2222	0.0358683
MosOpn3	1	Ventricle	274	25.3333	0.0352345
MosOpn3	1	Ventricle	275	25.4444	0.0348972
MosOpn3	1	Ventricle	276	25.5556	0.0345803
MosOpn3	1	Ventricle	277	25.6667	0.0342839
MosOpn3	1	Ventricle	278	25.7778	0.0333792
MosOpn3	1	Ventricle	279	25.8889	0.0334355
MosOpn3	1	Ventricle	280	26	0.0326944
MosOpn3	1	Ventricle	281	26.1111	0.0319482
MosOpn3	1	Ventricle	282	26.2222	0.031616
MosOpn3	1	Ventricle	283	26.3333	0.0313758
MosOpn3	1	Ventricle	284	26.4444	0.0310998
MosOpn3	1	Ventricle	285	26.5556	0.0305938
MosOpn3	1	Ventricle	286	26.6667	0.0307625
MosOpn3	1	Ventricle	287	26.7778	0.0301952
MosOpn3	1	Ventricle	288	26.8889	0.0300623
MosOpn3	1	Ventricle	289	27	0.0299038
MosOpn3	1	Ventricle	290	27.1111	0.0293519
MosOpn3	1	Ventricle	291	27.2222	0.0291781
MosOpn3	1	Ventricle	292	27.3333	0.0289123
MosOpn3	1	Ventricle	293	27.4444	0.0283348
MosOpn3	1	Ventricle	294	27.5556	0.0285597
MosOpn3	1	Ventricle	295	27.6667	0.0276959
MosOpn3	1	Ventricle	296	27.7778	0.0277419
MosOpn3	1	Ventricle	297	27.8889	0.0275886
MosOpn3	1	Ventricle	298	28	0.0268935
MosOpn3	1	Ventricle	299	28.1111	0.0269191
MosOpn3	1	Ventricle	300	28.2222	0.0267095
MosOpn3	1	Ventricle	301	28.3333	0.0264182
MosOpn3	1	Ventricle	302	28.4444	0.0265613
MosOpn3	1	Ventricle	303	28.5556	0.0266482
MosOpn3	1	Ventricle	304	28.6667	0.0259173
MosOpn3	1	Ventricle	305	28.7778	0.0257385
MosOpn3	1	Ventricle	306	28.8889	0.02535
MosOpn3	1	Ventricle	307	29	0.025718
MosOpn3	1	Ventricle	308	29.1111	0.0248645
MosOpn3	1	Ventricle	309	29.2222	0.0252989
MosOpn3	1	Ventricle	310	29.3333	0.02512
MosOpn3	1	Ventricle	311	29.4444	0.0245936
MosOpn3	1	Ventricle	312	29.5556	0.0246856
MosOpn3	1	Ventricle	313	29.6667	0.024333
MosOpn3	1	Ventricle	314	29.7778	0.0245578
MosOpn3	1	Ventricle	315	29.8889	0.0244658
MosOpn3	1	Ventricle	316	30	0.0240876
MosOpn3	1	Ventricle	317	30.1111	0.0234846
MosOpn3	1	Ventricle	318	30.2222	0.0234181
MosOpn3	1	Ventricle	319	30.3333	0.0230195
MosOpn3	1	Ventricle	320	30.4444	0.0232035
MosOpn3	1	Ventricle	321	30.5556	0.023137
MosOpn3	1	Ventricle	322	30.6667	0.0229939
MosOpn3	1	Ventricle	323	30.7778	0.0223602
MosOpn3	1	Ventricle	324	30.8889	0.0228712
MosOpn3	1	Ventricle	325	31	0.0226259
MosOpn3	1	Ventricle	326	31.1111	0.0225186
MosOpn3	1	Ventricle	327	31.2222	0.0226873
MosOpn3	1	Ventricle	328	31.3333	0.0225288
MosOpn3	1	Ventricle	329	31.4444	0.02143
MosOpn3	1	Ventricle	330	31.5556	0.0216497
MosOpn3	1	Ventricle	331	31.6667	0.0222119
MosOpn3	1	Ventricle	332	31.7778	0.0218337
MosOpn3	1	Ventricle	333	31.8889	0.0223142
MosOpn3	1	Ventricle	334	32	0.0216191
MosOpn3	1	Ventricle	335	32.1111	0.0218388
MosOpn3	1	Ventricle	336	32.2222	0.0216753
MosOpn3	1	Ventricle	337	32.3333	0.0205049
MosOpn3	1	Ventricle	338	32.4444	0.0207451
MosOpn3	1	Ventricle	339	32.5556	0.0210518
MosOpn3	1	Ventricle	340	32.6667	0.0210927
MosOpn3	1	Ventricle	341	32.7778	0.0212153
MosOpn3	1	Ventricle	342	32.8889	0.0210518
MosOpn3	1	Ventricle	343	33	0.0206736
MosOpn3	1	Ventricle	344	33.1111	0.0213686
MosOpn3	1	Ventricle	345	33.2222	0.0209393
MosOpn3	1	Ventricle	346	33.3333	0.0210978
MosOpn3	1	Ventricle	347	33.4444	0.0211744
MosOpn3	1	Ventricle	348	33.5556	0.0212715
MosOpn3	1	Ventricle	349	33.6667	0.0208627
MosOpn3	1	Ventricle	350	33.7778	0.0211489
MosOpn3	1	Ventricle	351	33.8889	0.0210722
MosOpn3	1	Ventricle	352	34	0.0208627
MosOpn3	1	Ventricle	353	34.1111	0.0202085
MosOpn3	1	Ventricle	354	34.2222	0.0204998
MosOpn3	1	Ventricle	355	34.3333	0.020142
MosOpn3	1	Ventricle	356	34.4444	0.020234
MosOpn3	1	Ventricle	357	34.5556	0.020464
MosOpn3	1	Ventricle	358	34.6667	0.0200398
MosOpn3	1	Ventricle	359	34.7778	0.0202698
MosOpn3	1	Ventricle	360	34.8889	0.019447
MosOpn3	1	Ventricle	361	35	0.0196718
MosOpn3	1	Ventricle	362	35.1111	0.0196258
MosOpn3	1	Ventricle	363	35.2222	0.0472911
MosOpn3	1	Ventricle	364	35.3333	0.11637
MosOpn3	1	Ventricle	365	35.4444	0.120254
MosOpn3	1	Ventricle	366	35.5556	0.106659
MosOpn3	1	Ventricle	367	35.6667	0.0946537
MosOpn3	1	Ventricle	368	35.7778	0.0841764
MosOpn3	1	Ventricle	369	35.8889	0.0760297
MosOpn3	1	Ventricle	370	36	0.0671214
MosOpn3	1	Ventricle	371	36.1111	0.0607583
MosOpn3	1	Ventricle	372	36.2222	0.0561892
MosOpn3	1	Ventricle	373	36.3333	0.0514003
MosOpn3	1	Ventricle	374	36.4444	0.0466165
MosOpn3	1	Ventricle	375	36.5556	0.0438668
MosOpn3	1	Ventricle	376	36.6667	0.0409945
MosOpn3	1	Ventricle	377	36.7778	0.0388121
MosOpn3	1	Ventricle	378	36.8889	0.0365991
MosOpn3	1	Ventricle	379	37	0.0348359
MosOpn3	1	Ventricle	380	37.1111	0.0326637
MosOpn3	1	Ventricle	381	37.2222	0.0315035
MosOpn3	1	Ventricle	382	37.3333	0.030374
MosOpn3	1	Ventricle	383	37.4444	0.0294745
MosOpn3	1	Ventricle	384	37.5556	0.0279566
MosOpn3	1	Ventricle	385	37.6667	0.0276908
MosOpn3	1	Ventricle	386	37.7778	0.0273075
MosOpn3	1	Ventricle	387	37.8889	0.0262598
MosOpn3	1	Ventricle	388	38	0.0256874
MosOpn3	1	Ventricle	389	38.1111	0.0248185
MosOpn3	1	Ventricle	390	38.2222	0.0242972
MosOpn3	1	Ventricle	391	38.3333	0.0247981
MosOpn3	1	Ventricle	392	38.4444	0.0240672
MosOpn3	1	Ventricle	393	38.5556	0.0239292
MosOpn3	1	Ventricle	394	38.6667	0.0234794
MosOpn3	1	Ventricle	395	38.7778	0.0234539
MosOpn3	1	Ventricle	396	38.8889	0.0238117
MosOpn3	1	Ventricle	397	39	0.023597
MosOpn3	1	Ventricle	398	39.1111	0.0231677
MosOpn3	1	Ventricle	399	39.2222	0.0229224
MosOpn3	1	Ventricle	400	39.3333	0.0229735
MosOpn3	1	Ventricle	401	39.4444	0.0212051
MosOpn3	1	Ventricle	402	39.5556	0.0221302
MosOpn3	1	Ventricle	403	39.6667	0.0221353
MosOpn3	1	Ventricle	404	39.7778	0.0222068
MosOpn3	1	Ventricle	405	39.8889	0.0217264
MosOpn3	1	Ventricle	406	40	0.0212562
MosOpn3	1	Ventricle	407	40.1111	0.0213329
MosOpn3	1	Ventricle	408	40.2222	0.0207604
MosOpn3	1	Ventricle	409	40.3333	0.0214504
MosOpn3	1	Ventricle	410	40.4444	0.0213431
MosOpn3	1	Ventricle	411	40.5556	0.0209291
MosOpn3	1	Ventricle	412	40.6667	0.0206122
MosOpn3	1	Ventricle	413	40.7778	0.0204998
MosOpn3	1	Ventricle	414	40.8889	0.0205611
MosOpn3	1	Ventricle	415	41	0.0204538
MosOpn3	1	Ventricle	416	41.1111	0.0465296
MosOpn3	1	Ventricle	417	41.2222	0.111509
MosOpn3	1	Ventricle	418	41.3333	0.117356
MosOpn3	1	Ventricle	419	41.4444	0.103853
MosOpn3	1	Ventricle	420	41.5556	0.0915361
MosOpn3	1	Ventricle	421	41.6667	0.0817283
MosOpn3	1	Ventricle	422	41.7778	0.0731829
MosOpn3	1	Ventricle	423	41.8889	0.0652354
MosOpn3	1	Ventricle	424	42	0.0590973
MosOpn3	1	Ventricle	425	42.1111	0.0540988
MosOpn3	1	Ventricle	426	42.2222	0.049729
MosOpn3	1	Ventricle	427	42.3333	0.0458907
MosOpn3	1	Ventricle	428	42.4444	0.0427731
MosOpn3	1	Ventricle	429	42.5556	0.0395634
MosOpn3	1	Ventricle	430	42.6667	0.0379228
MosOpn3	1	Ventricle	431	42.7778	0.0347745
MosOpn3	1	Ventricle	432	42.8889	0.0337063
MosOpn3	1	Ventricle	433	43	0.0325206
MosOpn3	1	Ventricle	434	43.1111	0.0313502
MosOpn3	1	Ventricle	435	43.2222	0.0301134
MosOpn3	1	Ventricle	436	43.3333	0.0295001
MosOpn3	1	Ventricle	437	43.4444	0.0285699
MosOpn3	1	Ventricle	438	43.5556	0.0274046
MosOpn3	1	Ventricle	439	43.6667	0.02696
MosOpn3	1	Ventricle	440	43.7778	0.0262904
MosOpn3	1	Ventricle	441	43.8889	0.0259122
MosOpn3	1	Ventricle	442	44	0.0255136
MosOpn3	1	Ventricle	443	44.1111	0.0252069
MosOpn3	1	Ventricle	444	44.2222	0.0217315
MosOpn3	1	Ventricle	445	44.3333	0.0219257
MosOpn3	1	Ventricle	446	44.4444	0.023551
MosOpn3	1	Ventricle	447	44.5556	0.0238628
MosOpn3	1	Ventricle	448	44.6667	0.0233721
MosOpn3	1	Ventricle	449	44.7778	0.0240161
MosOpn3	1	Ventricle	450	44.8889	0.0236941
MosOpn3	1	Ventricle	451	45	0.0265664
MosOpn3	1	Ventricle	452	45.1111	0.0869823
MosOpn3	1	Ventricle	453	45.2222	0.1205
MosOpn3	1	Ventricle	454	45.3333	0.110227
MosOpn3	1	Ventricle	455	45.4444	0.0975772
MosOpn3	1	Ventricle	456	45.5556	0.086737
MosOpn3	1	Ventricle	457	45.6667	0.0774249
MosOpn3	1	Ventricle	458	45.7778	0.0693037
MosOpn3	1	Ventricle	459	45.8889	0.0630122
MosOpn3	1	Ventricle	460	46	0.057288
MosOpn3	1	Ventricle	461	46.1111	0.0530766
MosOpn3	1	Ventricle	462	46.2222	0.0490288
MosOpn3	1	Ventricle	463	46.3333	0.044889
MosOpn3	1	Ventricle	464	46.4444	0.0417611
MosOpn3	1	Ventricle	465	46.5556	0.039497
MosOpn3	1	Ventricle	466	46.6667	0.037192
MosOpn3	1	Ventricle	467	46.7778	0.0359654
MosOpn3	1	Ventricle	468	46.8889	0.0337063
MosOpn3	1	Ventricle	469	47	0.0327711
MosOpn3	1	Ventricle	470	47.1111	0.0312531
MosOpn3	1	Ventricle	471	47.2222	0.0303996
MosOpn3	1	Ventricle	472	47.3333	0.0293672
MosOpn3	1	Ventricle	473	47.4444	0.028483
MosOpn3	1	Ventricle	474	47.5556	0.0282479
MosOpn3	1	Ventricle	475	47.6667	0.0272206
MosOpn3	1	Ventricle	476	47.7778	0.0266278
MosOpn3	1	Ventricle	477	47.8889	0.0263927
MosOpn3	1	Ventricle	478	48	0.0253398
MosOpn3	1	Ventricle	479	48.1111	0.0248901
MosOpn3	1	Ventricle	480	48.2222	0.0248849
MosOpn3	1	Ventricle	481	48.3333	0.0690277
MosOpn3	1	Ventricle	482	48.4444	0.11684
MosOpn3	1	Ventricle	483	48.5556	0.113988
MosOpn3	1	Ventricle	484	48.6667	0.100322
MosOpn3	1	Ventricle	485	48.7778	0.0893538
MosOpn3	1	Ventricle	486	48.8889	0.0798219
MosOpn3	1	Ventricle	487	49	0.072268
MosOpn3	1	Ventricle	488	49.1111	0.0656494
MosOpn3	1	Ventricle	489	49.2222	0.0589746
MosOpn3	1	Ventricle	490	49.3333	0.0542368
MosOpn3	1	Ventricle	491	49.4444	0.0501123
MosOpn3	1	Ventricle	492	49.5556	0.0463251
MosOpn3	1	Ventricle	493	49.6667	0.0422773
MosOpn3	1	Ventricle	494	49.7778	0.0406163
MosOpn3	1	Ventricle	495	49.8889	0.0377644
MosOpn3	1	Ventricle	496	50	0.0362107
MosOpn3	1	Ventricle	497	50.1111	0.0339006
MosOpn3	1	Ventricle	498	50.2222	0.0329602
MosOpn3	1	Ventricle	499	50.3333	0.0320606
MosOpn3	1	Ventricle	500	50.4444	0.0311969
MosOpn3	1	Ventricle	501	50.5556	0.0298834
MosOpn3	1	Ventricle	502	50.6667	0.0291168
MosOpn3	1	Ventricle	503	50.7778	0.0283603
MosOpn3	1	Ventricle	504	50.8889	0.0277113
MosOpn3	1	Ventricle	505	51	0.0273586
MosOpn3	1	Ventricle	506	51.1111	0.0316262
MosOpn3	1	Ventricle	507	51.2222	0.088812
MosOpn3	1	Ventricle	508	51.3333	0.120919
MosOpn3	1	Ventricle	509	51.4444	0.110416
MosOpn3	1	Ventricle	510	51.5556	0.097291
MosOpn3	1	Ventricle	511	51.6667	0.0866603
MosOpn3	1	Ventricle	512	51.7778	0.0780893
MosOpn3	1	Ventricle	513	51.8889	0.0702186
MosOpn3	1	Ventricle	514	52	0.0635233
MosOpn3	1	Ventricle	515	52.1111	0.0578246
MosOpn3	1	Ventricle	516	52.2222	0.0530971
MosOpn3	1	Ventricle	517	52.3333	0.0488244
MosOpn3	1	Ventricle	518	52.4444	0.0444239
MosOpn3	1	Ventricle	519	52.5556	0.0421495
MosOpn3	1	Ventricle	520	52.6667	0.0396605
MosOpn3	1	Ventricle	521	52.7778	0.0374271
MosOpn3	1	Ventricle	522	52.8889	0.0354389
MosOpn3	1	Ventricle	523	53	0.0339926
MosOpn3	1	Ventricle	524	53.1111	0.0323622
MosOpn3	1	Ventricle	525	53.2222	0.031248
MosOpn3	1	Ventricle	526	53.3333	0.0302463
MosOpn3	1	Ventricle	527	53.4444	0.0296687
MosOpn3	1	Ventricle	528	53.5556	0.0284779
MosOpn3	1	Ventricle	529	53.6667	0.0280639
MosOpn3	1	Ventricle	530	53.7778	0.0603341
MosOpn3	1	Ventricle	531	53.8889	0.113109
MosOpn3	1	Ventricle	532	54	0.118123
MosOpn3	1	Ventricle	533	54.1111	0.105172
MosOpn3	1	Ventricle	534	54.2222	0.0922874
MosOpn3	1	Ventricle	535	54.3333	0.08342
MosOpn3	1	Ventricle	536	54.4444	0.0749819
MosOpn3	1	Ventricle	537	54.5556	0.0674127
MosOpn3	1	Ventricle	538	54.6667	0.0614483
MosOpn3	1	Ventricle	539	54.7778	0.0559541
MosOpn3	1	Ventricle	540	54.8889	0.051344
MosOpn3	1	Ventricle	541	55	0.0472655
MosOpn3	1	Ventricle	542	55.1111	0.0443268
MosOpn3	1	Ventricle	543	55.2222	0.0413829
MosOpn3	1	Ventricle	544	55.3333	0.0388837
MosOpn3	1	Ventricle	545	55.4444	0.0368291
MosOpn3	1	Ventricle	546	55.5556	0.0349176
MosOpn3	1	Ventricle	547	55.6667	0.0334099
MosOpn3	1	Ventricle	548	55.7778	0.0326484
MosOpn3	1	Ventricle	549	55.8889	0.0314576
MosOpn3	1	Ventricle	550	56	0.0305836
MosOpn3	1	Ventricle	551	56.1111	0.0296279
MosOpn3	1	Ventricle	552	56.2222	0.0620974
MosOpn3	1	Ventricle	553	56.3333	0.113937
MosOpn3	1	Ventricle	554	56.4444	0.118787
MosOpn3	1	Ventricle	555	56.5556	0.104554
MosOpn3	1	Ventricle	556	56.6667	0.0929058
MosOpn3	1	Ventricle	557	56.7778	0.0830111
MosOpn3	1	Ventricle	558	56.8889	0.0749257
MosOpn3	1	Ventricle	559	57	0.0678318
MosOpn3	1	Ventricle	560	57.1111	0.0614687
MosOpn3	1	Ventricle	561	57.2222	0.0559643
MosOpn3	1	Ventricle	562	57.3333	0.0513236
MosOpn3	1	Ventricle	563	57.4444	0.0478942
MosOpn3	1	Ventricle	564	57.5556	0.044245
MosOpn3	1	Ventricle	565	57.6667	0.0411274
MosOpn3	1	Ventricle	566	57.7778	0.0389041
MosOpn3	1	Ventricle	567	57.8889	0.0366809
MosOpn3	1	Ventricle	568	58	0.0351476
MosOpn3	1	Ventricle	569	58.1111	0.0337575
MosOpn3	1	Ventricle	570	58.2222	0.0325819
MosOpn3	1	Ventricle	571	58.3333	0.031662
MosOpn3	1	Ventricle	572	58.4444	0.0305427
MosOpn3	1	Ventricle	573	58.5556	0.0676836
MosOpn3	1	Ventricle	574	58.6667	0.116682
MosOpn3	1	Ventricle	575	58.7778	0.117745
MosOpn3	1	Ventricle	576	58.8889	0.104175
MosOpn3	1	Ventricle	577	59	0.0928189
MosOpn3	1	Ventricle	578	59.1111	0.0825972
MosOpn3	1	Ventricle	579	59.2222	0.0745782
MosOpn3	1	Ventricle	580	59.3333	0.0675558
MosOpn3	1	Ventricle	581	59.4444	0.0615709
MosOpn3	1	Ventricle	582	59.5556	0.0560767
MosOpn3	1	Ventricle	583	59.6667	0.0516558
MosOpn3	1	Ventricle	584	59.7778	0.0478686
MosOpn3	1	Ventricle	585	59.8889	0.0445925
MosOpn3	1	Ventricle	586	60	0.04148
MosOpn3	1	Ventricle	587	60.1111	0.0385566
MosOpn3	1	Ventricle	588	60.2222	0.037146
MosOpn3	1	Ventricle	589	60.3333	0.0346876
MosOpn3	1	Ventricle	590	60.4444	0.0338341
MosOpn3	1	Ventricle	591	60.5556	0.0325922
MosOpn3	1	Ventricle	592	60.6667	0.0314218
MosOpn3	1	Ventricle	593	60.7778	0.0364662
MosOpn3	1	Ventricle	594	60.8889	0.0911017
MosOpn3	1	Ventricle	595	61	0.122748
MosOpn3	1	Ventricle	596	61.1111	0.111433
MosOpn3	1	Ventricle	597	61.2222	0.0985278
MosOpn3	1	Ventricle	598	61.3333	0.08803
MosOpn3	1	Ventricle	599	61.4444	0.0786924
MosOpn3	1	Ventricle	600	61.5556	0.0707501
MosOpn3	1	Ventricle	601	61.6667	0.0648266
MosOpn3	1	Ventricle	602	61.7778	0.0589082
MosOpn3	1	Ventricle	603	61.8889	0.0540324
MosOpn3	1	Ventricle	604	62	0.0497903
MosOpn3	1	Ventricle	605	62.1111	0.0463814
MosOpn3	1	Ventricle	606	62.2222	0.0432842
MosOpn3	1	Ventricle	607	62.3333	0.0409791
MosOpn3	1	Ventricle	608	62.4444	0.0387252
MosOpn3	1	Ventricle	609	62.5556	0.0364867
MosOpn3	1	Ventricle	610	62.6667	0.0342788
MosOpn3	1	Ventricle	611	62.7778	0.0321884
MosOpn3	1	Ventricle	612	62.8889	0.0310538
MosOpn3	1	Ventricle	613	63	0.0298987
MosOpn3	1	Ventricle	614	63.1111	0.0475978
MosOpn3	1	Ventricle	615	63.2222	0.103465
MosOpn3	1	Ventricle	616	63.3333	0.11985
MosOpn3	1	Ventricle	617	63.4444	0.105826
MosOpn3	1	Ventricle	618	63.5556	0.0943011
MosOpn3	1	Ventricle	619	63.6667	0.0842275
MosOpn3	1	Ventricle	620	63.7778	0.0755237
MosOpn3	1	Ventricle	621	63.8889	0.0677398
MosOpn3	1	Ventricle	622	64	0.0618316
MosOpn3	1	Ventricle	623	64.1111	0.0568894
MosOpn3	1	Ventricle	624	64.2222	0.0521209
MosOpn3	1	Ventricle	625	64.3333	0.0483235
MosOpn3	1	Ventricle	626	64.4444	0.0437084
MosOpn3	1	Ventricle	627	64.5556	0.0414902
MosOpn3	1	Ventricle	628	64.6667	0.0394152
MosOpn3	1	Ventricle	629	64.7778	0.0365429
MosOpn3	1	Ventricle	630	64.8889	0.0350403
MosOpn3	1	Ventricle	631	65	0.0333946
MosOpn3	1	Ventricle	632	65.1111	0.0320555
MosOpn3	1	Ventricle	633	65.2222	0.0299038
MosOpn3	1	Ventricle	634	65.3333	0.0295052
MosOpn3	1	Ventricle	635	65.4444	0.0285239
MosOpn3	1	Ventricle	636	65.5556	0.0278237
MosOpn3	1	Ventricle	637	65.6667	0.0471991
MosOpn3	1	Ventricle	638	65.7778	0.102371
MosOpn3	1	Ventricle	639	65.8889	0.116171
MosOpn3	1	Ventricle	640	66	0.102223
MosOpn3	1	Ventricle	641	66.1111	0.0910812
MosOpn3	1	Ventricle	642	66.2222	0.0811865
MosOpn3	1	Ventricle	643	66.3333	0.0727025
MosOpn3	1	Ventricle	644	66.4444	0.0654399
MosOpn3	1	Ventricle	645	66.5556	0.0586475
MosOpn3	1	Ventricle	646	66.6667	0.053787
MosOpn3	1	Ventricle	647	66.7778	0.0835018
MosOpn3	1	Ventricle	648	66.8889	0.135204
MosOpn3	1	Ventricle	649	67	0.139144
MosOpn3	1	Ventricle	650	67.1111	0.122559
MosOpn3	1	Ventricle	651	67.2222	0.109603
MosOpn3	1	Ventricle	652	67.3333	0.0966879
MosOpn3	1	Ventricle	653	67.4444	0.0987629
MosOpn3	1	Ventricle	654	67.5556	0.156567
MosOpn3	1	Ventricle	655	67.6667	0.179806
MosOpn3	1	Ventricle	656	67.7778	0.16087
MosOpn3	1	Ventricle	657	67.8889	0.142855
MosOpn3	1	Ventricle	658	68	0.127159
MosOpn3	1	Ventricle	659	68.1111	0.160426
MosOpn3	1	Ventricle	660	68.2222	0.209567
MosOpn3	1	Ventricle	661	68.3333	0.202586
MosOpn3	1	Ventricle	662	68.4444	0.177895
MosOpn3	1	Ventricle	663	68.5556	0.159705
MosOpn3	1	Ventricle	664	68.6667	0.187795
MosOpn3	1	Ventricle	665	68.7778	0.237749
MosOpn3	1	Ventricle	666	68.8889	0.230946
MosOpn3	1	Ventricle	667	69	0.205345
MosOpn3	1	Ventricle	668	69.1111	0.185004
MosOpn3	1	Ventricle	669	69.2222	0.232224
MosOpn3	1	Ventricle	670	69.3333	0.270535
MosOpn3	1	Ventricle	671	69.4444	0.246611
MosOpn3	1	Ventricle	672	69.5556	0.219748
MosOpn3	1	Ventricle	673	69.6667	0.226213
MosOpn3	1	Ventricle	674	69.7778	0.284437
MosOpn3	1	Ventricle	675	69.8889	0.282668
MosOpn3	1	Ventricle	676	70	0.252483
MosOpn3	1	Ventricle	677	70.1111	0.233328
MosOpn3	1	Ventricle	678	70.2222	0.289338
MosOpn3	1	Ventricle	679	70.3333	0.31431
MosOpn3	1	Ventricle	680	70.4444	0.280961
MosOpn3	1	Ventricle	681	70.5556	0.253066
MosOpn3	1	Ventricle	682	70.6667	0.292542
MosOpn3	1	Ventricle	683	70.7778	0.33069
MosOpn3	1	Ventricle	684	70.8889	0.3067
MosOpn3	1	Ventricle	685	71	0.272119
MosOpn3	1	Ventricle	686	71.1111	0.300362
MosOpn3	1	Ventricle	687	71.2222	0.348527
MosOpn3	1	Ventricle	688	71.3333	0.326106
MosOpn3	1	Ventricle	689	71.4444	0.289159
MosOpn3	1	Ventricle	690	71.5556	0.311621
MosOpn3	1	Ventricle	691	71.6667	0.360037
MosOpn3	1	Ventricle	692	71.7778	0.341116
MosOpn3	1	Ventricle	693	71.8889	0.304527
MosOpn3	1	Ventricle	694	72	0.327041
MosOpn3	1	Ventricle	695	72.1111	0.372635
MosOpn3	1	Ventricle	696	72.2222	0.351696
MosOpn3	1	Ventricle	697	72.3333	0.313288
MosOpn3	1	Ventricle	698	72.4444	0.342517
MosOpn3	1	Ventricle	699	72.5556	0.38069
MosOpn3	1	Ventricle	700	72.6667	0.355176
MosOpn3	1	Ventricle	701	72.7778	0.321997
MosOpn3	1	Ventricle	702	72.8889	0.361054
MosOpn3	1	Ventricle	703	73	0.39288
MosOpn3	1	Ventricle	704	73.1111	0.361851
MosOpn3	1	Ventricle	705	73.2222	0.329561
MosOpn3	1	Ventricle	706	73.3333	0.379126
MosOpn3	1	Ventricle	707	73.4444	0.398415
MosOpn3	1	Ventricle	708	73.5556	0.360446
MosOpn3	1	Ventricle	709	73.6667	0.341464
MosOpn3	1	Ventricle	710	73.7778	0.395144
MosOpn3	1	Ventricle	711	73.8889	0.39775
MosOpn3	1	Ventricle	712	74	0.358371
MosOpn3	1	Ventricle	713	74.1111	0.36065
MosOpn3	1	Ventricle	714	74.2222	0.409265
MosOpn3	1	Ventricle	715	74.3333	0.397316
MosOpn3	1	Ventricle	716	74.4444	0.355611
MosOpn3	1	Ventricle	717	74.5556	0.384022
MosOpn3	1	Ventricle	718	74.6667	0.418848
MosOpn3	1	Ventricle	719	74.7778	0.391643
MosOpn3	1	Ventricle	720	74.8889	0.357492
MosOpn3	1	Ventricle	721	75	0.406551
MosOpn3	1	Ventricle	722	75.1111	0.420954
MosOpn3	1	Ventricle	723	75.2222	0.381983
MosOpn3	1	Ventricle	724	75.3333	0.373438
MosOpn3	1	Ventricle	725	75.4444	0.422809
MosOpn3	1	Ventricle	726	75.5556	0.416103
MosOpn3	1	Ventricle	727	75.6667	0.374772
MosOpn3	1	Ventricle	728	75.7778	0.395527
MosOpn3	1	Ventricle	729	75.8889	0.434544
MosOpn3	1	Ventricle	730	76	0.407405
MosOpn3	1	Ventricle	731	76.1111	0.373228
MosOpn3	1	Ventricle	732	76.2222	0.420836
MosOpn3	1	Ventricle	733	76.3333	0.433281
MosOpn3	1	Ventricle	734	76.4444	0.39382
MosOpn3	1	Ventricle	735	76.5556	0.386108
MosOpn3	1	Ventricle	736	76.6667	0.437523
MosOpn3	1	Ventricle	737	76.7778	0.425467
MosOpn3	1	Ventricle	738	76.8889	0.382719
MosOpn3	1	Ventricle	739	77	0.414616
MosOpn3	1	Ventricle	740	77.1111	0.442143
MosOpn3	1	Ventricle	741	77.2222	0.411243
MosOpn3	1	Ventricle	742	77.3333	0.386005
MosOpn3	1	Ventricle	743	77.4444	0.432964
MosOpn3	1	Ventricle	744	77.5556	0.434058
MosOpn3	1	Ventricle	745	77.6667	0.39519
MosOpn3	1	Ventricle	746	77.7778	0.406127
MosOpn3	1	Ventricle	747	77.8889	0.447029
MosOpn3	1	Ventricle	748	78	0.423489
MosOpn3	1	Ventricle	749	78.1111	0.389348
MosOpn3	1	Ventricle	750	78.2222	0.433486
MosOpn3	1	Ventricle	751	78.3333	0.446207
MosOpn3	1	Ventricle	752	78.4444	0.408233
MosOpn3	1	Ventricle	753	78.5556	0.402713
MosOpn3	1	Ventricle	754	78.6667	0.450684
MosOpn3	1	Ventricle	755	78.7778	0.434513
MosOpn3	1	Ventricle	756	78.8889	0.392563
MosOpn3	1	Ventricle	757	79	0.41826
MosOpn3	1	Ventricle	758	79.1111	0.440503
MosOpn3	1	Ventricle	759	79.2222	0.412541
MosOpn3	1	Ventricle	760	79.3333	0.397955
MosOpn3	1	Ventricle	761	79.4444	0.447525
MosOpn3	1	Ventricle	762	79.5556	0.437712
MosOpn3	1	Ventricle	763	79.6667	0.399861
MosOpn3	1	Ventricle	764	79.7778	0.42379
MosOpn3	1	Ventricle	765	79.8889	0.45188
MosOpn3	1	Ventricle	766	80	0.423044
MosOpn3	1	Ventricle	767	80.1111	0.399053
MosOpn3	1	Ventricle	768	80.2222	0.44867
MosOpn3	1	Ventricle	769	80.3333	0.444873
MosOpn3	1	Ventricle	770	80.4444	0.406832
MosOpn3	1	Ventricle	771	80.5556	0.420473
MosOpn3	1	Ventricle	772	80.6667	0.455462
MosOpn3	1	Ventricle	773	80.7778	0.430654
MosOpn3	1	Ventricle	774	80.8889	0.397607
MosOpn3	1	Ventricle	775	81	0.443876
MosOpn3	1	Ventricle	776	81.1111	0.447965
MosOpn3	1	Ventricle	777	81.2222	0.412572
MosOpn3	1	Atrium	1	-5	0
MosOpn3	1	Atrium	2	-4.88889	0
MosOpn3	1	Atrium	3	-4.77778	0
MosOpn3	1	Atrium	4	-4.66667	0
MosOpn3	1	Atrium	5	-4.55556	0
MosOpn3	1	Atrium	6	-4.44444	0
MosOpn3	1	Atrium	7	-4.33333	0
MosOpn3	1	Atrium	8	-4.22222	0
MosOpn3	1	Atrium	9	-4.11111	0
MosOpn3	1	Atrium	10	-4	0
MosOpn3	1	Atrium	11	-3.88889	0
MosOpn3	1	Atrium	12	-3.77778	0
MosOpn3	1	Atrium	13	-3.66667	0
MosOpn3	1	Atrium	14	-3.55556	0
MosOpn3	1	Atrium	15	-3.44444	0
MosOpn3	1	Atrium	16	-3.33333	0
MosOpn3	1	Atrium	17	-3.22222	0
MosOpn3	1	Atrium	18	-3.11111	0
MosOpn3	1	Atrium	19	-3	0
MosOpn3	1	Atrium	20	-2.88889	0
MosOpn3	1	Atrium	21	-2.77778	0
MosOpn3	1	Atrium	22	-2.66667	0
MosOpn3	1	Atrium	23	-2.55556	0
MosOpn3	1	Atrium	24	-2.44444	0
MosOpn3	1	Atrium	25	-2.33333	0
MosOpn3	1	Atrium	26	-2.22222	0
MosOpn3	1	Atrium	27	-2.11111	0
MosOpn3	1	Atrium	28	-2	0
MosOpn3	1	Atrium	29	-1.88889	0
MosOpn3	1	Atrium	30	-1.77778	0
MosOpn3	1	Atrium	31	-1.66667	0
MosOpn3	1	Atrium	32	-1.55556	0
MosOpn3	1	Atrium	33	-1.44444	0
MosOpn3	1	Atrium	34	-1.33333	0
MosOpn3	1	Atrium	35	-1.22222	0
MosOpn3	1	Atrium	36	-1.11111	0
MosOpn3	1	Atrium	37	-1	0
MosOpn3	1	Atrium	38	-0.888889	0
MosOpn3	1	Atrium	39	-0.777778	0
MosOpn3	1	Atrium	40	-0.666667	0
MosOpn3	1	Atrium	41	-0.555556	0
MosOpn3	1	Atrium	42	-0.444444	0
MosOpn3	1	Atrium	43	-0.333333	0
MosOpn3	1	Atrium	44	-0.222222	0
MosOpn3	1	Atrium	45	-0.111111	0
MosOpn3	1	Atrium	46	0	0.00964224
MosOpn3	1	Atrium	47	0.111111	1.18795
MosOpn3	1	Atrium	48	0.222222	1.14224
MosOpn3	1	Atrium	49	0.333333	1.0904
MosOpn3	1	Atrium	50	0.444444	1.00618
MosOpn3	1	Atrium	51	0.555556	0.975601
MosOpn3	1	Atrium	52	0.666667	0.915754
MosOpn3	1	Atrium	53	0.777778	0.842635
MosOpn3	1	Atrium	54	0.888889	0.781382
MosOpn3	1	Atrium	55	1	0.754357
MosOpn3	1	Atrium	56	1.11111	0.711156
MosOpn3	1	Atrium	57	1.22222	0.695863
MosOpn3	1	Atrium	58	1.33333	0.667275
MosOpn3	1	Atrium	59	1.44444	0.630085
MosOpn3	1	Atrium	60	1.55556	0.59379
MosOpn3	1	Atrium	61	1.66667	0.558383
MosOpn3	1	Atrium	62	1.77778	0.546333
MosOpn3	1	Atrium	63	1.88889	0.506509
MosOpn3	1	Atrium	64	2	0.490828
MosOpn3	1	Atrium	65	2.11111	0.492121
MosOpn3	1	Atrium	66	2.22222	0.484358
MosOpn3	1	Atrium	67	2.33333	0.48438
MosOpn3	1	Atrium	68	2.44444	0.485716
MosOpn3	1	Atrium	69	2.55556	0.44322
MosOpn3	1	Atrium	70	2.66667	0.429748
MosOpn3	1	Atrium	71	2.77778	0.443678
MosOpn3	1	Atrium	72	2.88889	0.410307
MosOpn3	1	Atrium	73	3	0.409273
MosOpn3	1	Atrium	74	3.11111	0.412801
MosOpn3	1	Atrium	75	3.22222	0.396183
MosOpn3	1	Atrium	76	3.33333	0.42128
MosOpn3	1	Atrium	77	3.44444	0.403832
MosOpn3	1	Atrium	78	3.55556	0.398273
MosOpn3	1	Atrium	79	3.66667	0.404112
MosOpn3	1	Atrium	80	3.77778	0.390705
MosOpn3	1	Atrium	81	3.88889	0.404268
MosOpn3	1	Atrium	82	4	0.364304
MosOpn3	1	Atrium	83	4.11111	0.350019
MosOpn3	1	Atrium	84	4.22222	0.368538
MosOpn3	1	Atrium	85	4.33333	0.365985
MosOpn3	1	Atrium	86	4.44444	0.37184
MosOpn3	1	Atrium	87	4.55556	0.354964
MosOpn3	1	Atrium	88	4.66667	0.367574
MosOpn3	1	Atrium	89	4.77778	0.375326
MosOpn3	1	Atrium	90	4.88889	0.354118
MosOpn3	1	Atrium	91	5	0.372761
MosOpn3	1	Atrium	92	5.11111	0.357404
MosOpn3	1	Atrium	93	5.22222	0.361428
MosOpn3	1	Atrium	94	5.33333	0.349593
MosOpn3	1	Atrium	95	5.44444	0.361428
MosOpn3	1	Atrium	96	5.55556	0.365042
MosOpn3	1	Atrium	97	5.66667	0.342677
MosOpn3	1	Atrium	98	5.77778	0.363205
MosOpn3	1	Atrium	99	5.88889	0.349318
MosOpn3	1	Atrium	100	6	0.353789
MosOpn3	1	Atrium	101	6.11111	0.33318
MosOpn3	1	Atrium	102	6.22222	0.357038
MosOpn3	1	Atrium	103	6.33333	0.35233
MosOpn3	1	Atrium	104	6.44444	0.332323
MosOpn3	1	Atrium	105	6.55556	0.343463
MosOpn3	1	Atrium	106	6.66667	0.342461
MosOpn3	1	Atrium	107	6.77778	0.331413
MosOpn3	1	Atrium	108	6.88889	0.307625
MosOpn3	1	Atrium	109	7	0.341017
MosOpn3	1	Atrium	110	7.11111	0.325902
MosOpn3	1	Atrium	111	7.22222	0.309823
MosOpn3	1	Atrium	112	7.33333	0.302777
MosOpn3	1	Atrium	113	7.44444	0.331235
MosOpn3	1	Atrium	114	7.55556	0.326888
MosOpn3	1	Atrium	115	7.66667	0.304776
MosOpn3	1	Atrium	116	7.77778	0.314531
MosOpn3	1	Atrium	117	7.88889	0.32287
MosOpn3	1	Atrium	118	8	0.322008
MosOpn3	1	Atrium	119	8.11111	0.2962
MosOpn3	1	Atrium	120	8.22222	0.324534
MosOpn3	1	Atrium	121	8.33333	0.323123
MosOpn3	1	Atrium	122	8.44444	0.313098
MosOpn3	1	Atrium	123	8.55556	0.290242
MosOpn3	1	Atrium	124	8.66667	0.327443
MosOpn3	1	Atrium	125	8.77778	0.322514
MosOpn3	1	Atrium	126	8.88889	0.306828
MosOpn3	1	Atrium	127	9	0.290555
MosOpn3	1	Atrium	128	9.11111	0.324653
MosOpn3	1	Atrium	129	9.22222	0.316443
MosOpn3	1	Atrium	130	9.33333	0.297358
MosOpn3	1	Atrium	131	9.44444	0.290393
MosOpn3	1	Atrium	132	9.55556	0.317251
MosOpn3	1	Atrium	133	9.66667	0.319745
MosOpn3	1	Atrium	134	9.77778	0.293835
MosOpn3	1	Atrium	135	9.88889	0.293792
MosOpn3	1	Atrium	136	10	0.312231
MosOpn3	1	Atrium	137	10.1111	0.308331
MosOpn3	1	Atrium	138	10.2222	0.281316
MosOpn3	1	Atrium	139	10.3333	0.291045
MosOpn3	1	Atrium	140	10.4444	0.307194
MosOpn3	1	Atrium	141	10.5556	0.301829
MosOpn3	1	Atrium	142	10.6667	0.277578
MosOpn3	1	Atrium	143	10.7778	0.28771
MosOpn3	1	Atrium	144	10.8889	0.304808
MosOpn3	1	Atrium	145	11	0.296906
MosOpn3	1	Atrium	146	11.1111	0.27106
MosOpn3	1	Atrium	147	11.2222	0.282027
MosOpn3	1	Atrium	148	11.3333	0.301711
MosOpn3	1	Atrium	149	11.4444	0.30128
MosOpn3	1	Atrium	150	11.5556	0.272514
MosOpn3	1	Atrium	151	11.6667	0.278628
MosOpn3	1	Atrium	152	11.7778	0.302793
MosOpn3	1	Atrium	153	11.8889	0.295117
MosOpn3	1	Atrium	154	12	0.269767
MosOpn3	1	Atrium	155	12.1111	0.266551
MosOpn3	1	Atrium	156	12.2222	0.299475
MosOpn3	1	Atrium	157	12.3333	0.296766
MosOpn3	1	Atrium	158	12.4444	0.270742
MosOpn3	1	Atrium	159	12.5556	0.255724
MosOpn3	1	Atrium	160	12.6667	0.296469
MosOpn3	1	Atrium	161	12.7778	0.29348
MosOpn3	1	Atrium	162	12.8889	0.272218
MosOpn3	1	Atrium	163	13	0.249459
MosOpn3	1	Atrium	164	13.1111	0.289704
MosOpn3	1	Atrium	165	13.2222	0.292198
MosOpn3	1	Atrium	166	13.3333	0.275057
MosOpn3	1	Atrium	167	13.4444	0.251706
MosOpn3	1	Atrium	168	13.5556	0.272886
MosOpn3	1	Atrium	169	13.6667	0.291702
MosOpn3	1	Atrium	170	13.7778	0.276366
MosOpn3	1	Atrium	171	13.8889	0.253025
MosOpn3	1	Atrium	172	14	0.246928
MosOpn3	1	Atrium	173	14.1111	0.285513
MosOpn3	1	Atrium	174	14.2222	0.285066
MosOpn3	1	Atrium	175	14.3333	0.26034
MosOpn3	1	Atrium	176	14.4444	0.237339
MosOpn3	1	Atrium	177	14.5556	0.276743
MosOpn3	1	Atrium	178	14.6667	0.283956
MosOpn3	1	Atrium	179	14.7778	0.262328
MosOpn3	1	Atrium	180	14.8889	0.240647
MosOpn3	1	Atrium	181	15	0.241945
MosOpn3	1	Atrium	182	15.1111	0.282642
MosOpn3	1	Atrium	183	15.2222	0.267101
MosOpn3	1	Atrium	184	15.3333	0.245096
MosOpn3	1	Atrium	185	15.4444	0.225122
MosOpn3	1	Atrium	186	15.5556	0.255525
MosOpn3	1	Atrium	187	15.6667	0.276021
MosOpn3	1	Atrium	188	15.7778	0.255713
MosOpn3	1	Atrium	189	15.8889	0.235815
MosOpn3	1	Atrium	190	16	0.214144
MosOpn3	1	Atrium	191	16.1111	0.258444
MosOpn3	1	Atrium	192	16.2222	0.268663
MosOpn3	1	Atrium	193	16.3333	0.246265
MosOpn3	1	Atrium	194	16.4444	0.224222
MosOpn3	1	Atrium	195	16.5556	0.205762
MosOpn3	1	Atrium	196	16.6667	0.241692
MosOpn3	1	Atrium	197	16.7778	0.261052
MosOpn3	1	Atrium	198	16.8889	0.239946
MosOpn3	1	Atrium	199	17	0.22043
MosOpn3	1	Atrium	200	17.1111	0.200472
MosOpn3	1	Atrium	201	17.2222	0.185206
MosOpn3	1	Atrium	202	17.3333	0.230821
MosOpn3	1	Atrium	203	17.4444	0.248511
MosOpn3	1	Atrium	204	17.5556	0.226334
MosOpn3	1	Atrium	205	17.6667	0.206586
MosOpn3	1	Atrium	206	17.7778	0.187997
MosOpn3	1	Atrium	207	17.8889	0.171626
MosOpn3	1	Atrium	208	18	0.157228
MosOpn3	1	Atrium	209	18.1111	0.144224
MosOpn3	1	Atrium	210	18.2222	0.13267
MosOpn3	1	Atrium	211	18.3333	0.122909
MosOpn3	1	Atrium	212	18.4444	0.1131
MosOpn3	1	Atrium	213	18.5556	0.10461
MosOpn3	1	Atrium	214	18.6667	0.0982916
MosOpn3	1	Atrium	215	18.7778	0.0915313
MosOpn3	1	Atrium	216	18.8889	0.0861661
MosOpn3	1	Atrium	217	19	0.0818675
MosOpn3	1	Atrium	218	19.1111	0.0769063
MosOpn3	1	Atrium	219	19.2222	0.0730009
MosOpn3	1	Atrium	220	19.3333	0.0691925
MosOpn3	1	Atrium	221	19.4444	0.0666446
MosOpn3	1	Atrium	222	19.5556	0.0639997
MosOpn3	1	Atrium	223	19.6667	0.0612363
MosOpn3	1	Atrium	224	19.7778	0.0589847
MosOpn3	1	Atrium	225	19.8889	0.0570616
MosOpn3	1	Atrium	226	20	0.0552463
MosOpn3	1	Atrium	227	20.1111	0.0533986
MosOpn3	1	Atrium	228	20.2222	0.0518203
MosOpn3	1	Atrium	229	20.3333	0.0505113
MosOpn3	1	Atrium	230	20.4444	0.0492885
MosOpn3	1	Atrium	231	20.5556	0.0480119
MosOpn3	1	Atrium	232	20.6667	0.0463258
MosOpn3	1	Atrium	233	20.7778	0.0457225
MosOpn3	1	Atrium	234	20.8889	0.0444351
MosOpn3	1	Atrium	235	21	0.0433362
MosOpn3	1	Atrium	236	21.1111	0.0427437
MosOpn3	1	Atrium	237	21.2222	0.041968
MosOpn3	1	Atrium	238	21.3333	0.0414724
MosOpn3	1	Atrium	239	21.4444	0.0413216
MosOpn3	1	Atrium	240	21.5556	0.0404813
MosOpn3	1	Atrium	241	21.6667	0.0399587
MosOpn3	1	Atrium	242	21.7778	0.0393931
MosOpn3	1	Atrium	243	21.8889	0.0390107
MosOpn3	1	Atrium	244	22	0.038639
MosOpn3	1	Atrium	245	22.1111	0.0376424
MosOpn3	1	Atrium	246	22.2222	0.0373569
MosOpn3	1	Atrium	247	22.3333	0.0370337
MosOpn3	1	Atrium	248	22.4444	0.0360911
MosOpn3	1	Atrium	249	22.5556	0.0358163
MosOpn3	1	Atrium	250	22.6667	0.0353154
MosOpn3	1	Atrium	251	22.7778	0.0351699
MosOpn3	1	Atrium	252	22.8889	0.0345235
MosOpn3	1	Atrium	253	23	0.0342165
MosOpn3	1	Atrium	254	23.1111	0.0334947
MosOpn3	1	Atrium	255	23.2222	0.0331499
MosOpn3	1	Atrium	256	23.3333	0.032455
MosOpn3	1	Atrium	257	23.4444	0.0323204
MosOpn3	1	Atrium	258	23.5556	0.0318571
MosOpn3	1	Atrium	259	23.6667	0.031884
MosOpn3	1	Atrium	260	23.7778	0.0313077
MosOpn3	1	Atrium	261	23.8889	0.0311622
MosOpn3	1	Atrium	262	24	0.030101
MosOpn3	1	Atrium	263	24.1111	0.0305858
MosOpn3	1	Atrium	264	24.2222	0.0301118
MosOpn3	1	Atrium	265	24.3333	0.0290075
MosOpn3	1	Atrium	266	24.4444	0.0288244
MosOpn3	1	Atrium	267	24.5556	0.0286735
MosOpn3	1	Atrium	268	24.6667	0.0287705
MosOpn3	1	Atrium	269	24.7778	0.0283019
MosOpn3	1	Atrium	270	24.8889	0.0281295
MosOpn3	1	Atrium	271	25	0.0281241
MosOpn3	1	Atrium	272	25.1111	0.0280325
MosOpn3	1	Atrium	273	25.2222	0.0278548
MosOpn3	1	Atrium	274	25.3333	0.0275585
MosOpn3	1	Atrium	275	25.4444	0.0274454
MosOpn3	1	Atrium	276	25.5556	0.0272945
MosOpn3	1	Atrium	277	25.6667	0.0272514
MosOpn3	1	Atrium	278	25.7778	0.0267074
MosOpn3	1	Atrium	279	25.8889	0.0267451
MosOpn3	1	Atrium	280	26	0.0261957
MosOpn3	1	Atrium	281	26.1111	0.0257863
MosOpn3	1	Atrium	282	26.2222	0.025657
MosOpn3	1	Atrium	283	26.3333	0.0255439
MosOpn3	1	Atrium	284	26.4444	0.0254092
MosOpn3	1	Atrium	285	26.5556	0.0251021
MosOpn3	1	Atrium	286	26.6667	0.0252422
MosOpn3	1	Atrium	287	26.7778	0.0248975
MosOpn3	1	Atrium	288	26.8889	0.0249082
MosOpn3	1	Atrium	289	27	0.0248759
MosOpn3	1	Atrium	290	27.1111	0.0244611
MosOpn3	1	Atrium	291	27.2222	0.0244773
MosOpn3	1	Atrium	292	27.3333	0.0243911
MosOpn3	1	Atrium	293	27.4444	0.0241487
MosOpn3	1	Atrium	294	27.5556	0.0244342
MosOpn3	1	Atrium	295	27.6667	0.0237285
MosOpn3	1	Atrium	296	27.7778	0.0238901
MosOpn3	1	Atrium	297	27.8889	0.0238578
MosOpn3	1	Atrium	298	28	0.0233461
MosOpn3	1	Atrium	299	28.1111	0.0235292
MosOpn3	1	Atrium	300	28.2222	0.0233568
MosOpn3	1	Atrium	301	28.3333	0.0232114
MosOpn3	1	Atrium	302	28.4444	0.023443
MosOpn3	1	Atrium	303	28.5556	0.0236046
MosOpn3	1	Atrium	304	28.6667	0.0229798
MosOpn3	1	Atrium	305	28.7778	0.0231252
MosOpn3	1	Atrium	306	28.8889	0.0225865
MosOpn3	1	Atrium	307	29	0.0229421
MosOpn3	1	Atrium	308	29.1111	0.0224788
MosOpn3	1	Atrium	309	29.2222	0.0227374
MosOpn3	1	Atrium	310	29.3333	0.0227428
MosOpn3	1	Atrium	311	29.4444	0.0224734
MosOpn3	1	Atrium	312	29.5556	0.0226135
MosOpn3	1	Atrium	313	29.6667	0.0223172
MosOpn3	1	Atrium	314	29.7778	0.0226727
MosOpn3	1	Atrium	315	29.8889	0.0225327
MosOpn3	1	Atrium	316	30	0.0225704
MosOpn3	1	Atrium	317	30.1111	0.0220102
MosOpn3	1	Atrium	318	30.2222	0.021897
MosOpn3	1	Atrium	319	30.3333	0.0216008
MosOpn3	1	Atrium	320	30.4444	0.0218917
MosOpn3	1	Atrium	321	30.5556	0.0218109
MosOpn3	1	Atrium	322	30.6667	0.021854
MosOpn3	1	Atrium	323	30.7778	0.0211591
MosOpn3	1	Atrium	324	30.8889	0.0215361
MosOpn3	1	Atrium	325	31	0.0215415
MosOpn3	1	Atrium	326	31.1111	0.0214769
MosOpn3	1	Atrium	327	31.2222	0.0216331
MosOpn3	1	Atrium	328	31.3333	0.0214284
MosOpn3	1	Atrium	329	31.4444	0.0207389
MosOpn3	1	Atrium	330	31.5556	0.0208359
MosOpn3	1	Atrium	331	31.6667	0.0214069
MosOpn3	1	Atrium	332	31.7778	0.0209759
MosOpn3	1	Atrium	333	31.8889	0.0212776
MosOpn3	1	Atrium	334	32	0.0210836
MosOpn3	1	Atrium	335	32.1111	0.0210244
MosOpn3	1	Atrium	336	32.2222	0.0209867
MosOpn3	1	Atrium	337	32.3333	0.0201895
MosOpn3	1	Atrium	338	32.4444	0.0203834
MosOpn3	1	Atrium	339	32.5556	0.0206312
MosOpn3	1	Atrium	340	32.6667	0.0207227
MosOpn3	1	Atrium	341	32.7778	0.020879
MosOpn3	1	Atrium	342	32.8889	0.0205504
MosOpn3	1	Atrium	343	33	0.0204103
MosOpn3	1	Atrium	344	33.1111	0.0210028
MosOpn3	1	Atrium	345	33.2222	0.0207658
MosOpn3	1	Atrium	346	33.3333	0.0209975
MosOpn3	1	Atrium	347	33.4444	0.0210244
MosOpn3	1	Atrium	348	33.5556	0.0209436
MosOpn3	1	Atrium	349	33.6667	0.020685
MosOpn3	1	Atrium	350	33.7778	0.0209759
MosOpn3	1	Atrium	351	33.8889	0.0209382
MosOpn3	1	Atrium	352	34	0.0206204
MosOpn3	1	Atrium	353	34.1111	0.0201787
MosOpn3	1	Atrium	354	34.2222	0.0203888
MosOpn3	1	Atrium	355	34.3333	0.0203241
MosOpn3	1	Atrium	356	34.4444	0.0203564
MosOpn3	1	Atrium	357	34.5556	0.020545
MosOpn3	1	Atrium	358	34.6667	0.0202864
MosOpn3	1	Atrium	359	34.7778	0.0204103
MosOpn3	1	Atrium	360	34.8889	0.0198501
MosOpn3	1	Atrium	361	35	0.0198878
MosOpn3	1	Atrium	362	35.1111	0.0199794
MosOpn3	1	Atrium	363	35.2222	0.0331068
MosOpn3	1	Atrium	364	35.3333	0.112545
MosOpn3	1	Atrium	365	35.4444	0.112647
MosOpn3	1	Atrium	366	35.5556	0.0975051
MosOpn3	1	Atrium	367	35.6667	0.0858159
MosOpn3	1	Atrium	368	35.7778	0.0760013
MosOpn3	1	Atrium	369	35.8889	0.0684491
MosOpn3	1	Atrium	370	36	0.0606869
MosOpn3	1	Atrium	371	36.1111	0.0549338
MosOpn3	1	Atrium	372	36.2222	0.0507753
MosOpn3	1	Atrium	373	36.3333	0.0465252
MosOpn3	1	Atrium	374	36.4444	0.042372
MosOpn3	1	Atrium	375	36.5556	0.0398725
MosOpn3	1	Atrium	376	36.6667	0.0372223
MosOpn3	1	Atrium	377	36.7778	0.0354824
MosOpn3	1	Atrium	378	36.8889	0.0335431
MosOpn3	1	Atrium	379	37	0.0320726
MosOpn3	1	Atrium	380	37.1111	0.030268
MosOpn3	1	Atrium	381	37.2222	0.0292984
MosOpn3	1	Atrium	382	37.3333	0.0282803
MosOpn3	1	Atrium	383	37.4444	0.0274561
MosOpn3	1	Atrium	384	37.5556	0.0262441
MosOpn3	1	Atrium	385	37.6667	0.0257863
MosOpn3	1	Atrium	386	37.7778	0.025587
MosOpn3	1	Atrium	387	37.8889	0.0248113
MosOpn3	1	Atrium	388	38	0.0244611
MosOpn3	1	Atrium	389	38.1111	0.0237447
MosOpn3	1	Atrium	390	38.2222	0.0232814
MosOpn3	1	Atrium	391	38.3333	0.0235131
MosOpn3	1	Atrium	392	38.4444	0.0229959
MosOpn3	1	Atrium	393	38.5556	0.0229097
MosOpn3	1	Atrium	394	38.6667	0.0225327
MosOpn3	1	Atrium	395	38.7778	0.0225596
MosOpn3	1	Atrium	396	38.8889	0.0227859
MosOpn3	1	Atrium	397	39	0.0225488
MosOpn3	1	Atrium	398	39.1111	0.0224519
MosOpn3	1	Atrium	399	39.2222	0.0220425
MosOpn3	1	Atrium	400	39.3333	0.0220802
MosOpn3	1	Atrium	401	39.4444	0.0207766
MosOpn3	1	Atrium	402	39.5556	0.0215307
MosOpn3	1	Atrium	403	39.6667	0.021326
MosOpn3	1	Atrium	404	39.7778	0.0214823
MosOpn3	1	Atrium	405	39.8889	0.0210944
MosOpn3	1	Atrium	406	40	0.0206042
MosOpn3	1	Atrium	407	40.1111	0.0206796
MosOpn3	1	Atrium	408	40.2222	0.0202756
MosOpn3	1	Atrium	409	40.3333	0.0208628
MosOpn3	1	Atrium	410	40.4444	0.0206743
MosOpn3	1	Atrium	411	40.5556	0.0204696
MosOpn3	1	Atrium	412	40.6667	0.0202325
MosOpn3	1	Atrium	413	40.7778	0.0202379
MosOpn3	1	Atrium	414	40.8889	0.0199848
MosOpn3	1	Atrium	415	41	0.0200009
MosOpn3	1	Atrium	416	41.1111	0.0327298
MosOpn3	1	Atrium	417	41.2222	0.116181
MosOpn3	1	Atrium	418	41.3333	0.109528
MosOpn3	1	Atrium	419	41.4444	0.0955444
MosOpn3	1	Atrium	420	41.5556	0.083839
MosOpn3	1	Atrium	421	41.6667	0.0746385
MosOpn3	1	Atrium	422	41.7778	0.0668547
MosOpn3	1	Atrium	423	41.8889	0.0594964
MosOpn3	1	Atrium	424	42	0.0537757
MosOpn3	1	Atrium	425	42.1111	0.0494609
MosOpn3	1	Atrium	426	42.2222	0.0454694
MosOpn3	1	Atrium	427	42.3333	0.0420703
MosOpn3	1	Atrium	428	42.4444	0.0392046
MosOpn3	1	Atrium	429	42.5556	0.0364412
MosOpn3	1	Atrium	430	42.6667	0.0348575
MosOpn3	1	Atrium	431	42.7778	0.0323096
MosOpn3	1	Atrium	432	42.8889	0.0313615
MosOpn3	1	Atrium	433	43	0.0301064
MosOpn3	1	Atrium	434	43.1111	0.0291691
MosOpn3	1	Atrium	435	43.2222	0.0280541
MosOpn3	1	Atrium	436	43.3333	0.0274077
MosOpn3	1	Atrium	437	43.4444	0.026702
MosOpn3	1	Atrium	438	43.5556	0.025727
MosOpn3	1	Atrium	439	43.6667	0.0251291
MosOpn3	1	Atrium	440	43.7778	0.0240302
MosOpn3	1	Atrium	441	43.8889	0.0240302
MosOpn3	1	Atrium	442	44	0.0232006
MosOpn3	1	Atrium	443	44.1111	0.0229959
MosOpn3	1	Atrium	444	44.2222	0.0240463
MosOpn3	1	Atrium	445	44.3333	0.02354
MosOpn3	1	Atrium	446	44.4444	0.0235939
MosOpn3	1	Atrium	447	44.5556	0.0233892
MosOpn3	1	Atrium	448	44.6667	0.0229044
MosOpn3	1	Atrium	449	44.7778	0.0232599
MosOpn3	1	Atrium	450	44.8889	0.023066
MosOpn3	1	Atrium	451	45	0.023777
MosOpn3	1	Atrium	452	45.1111	0.073378
MosOpn3	1	Atrium	453	45.2222	0.123765
MosOpn3	1	Atrium	454	45.3333	0.102725
MosOpn3	1	Atrium	455	45.4444	0.0901199
MosOpn3	1	Atrium	456	45.5556	0.0796805
MosOpn3	1	Atrium	457	45.6667	0.0712987
MosOpn3	1	Atrium	458	45.7778	0.063962
MosOpn3	1	Atrium	459	45.8889	0.0580635
MosOpn3	1	Atrium	460	46	0.0529892
MosOpn3	1	Atrium	461	46.1111	0.0490785
MosOpn3	1	Atrium	462	46.2222	0.0454694
MosOpn3	1	Atrium	463	46.3333	0.0419249
MosOpn3	1	Atrium	464	46.4444	0.0390861
MosOpn3	1	Atrium	465	46.5556	0.0370176
MosOpn3	1	Atrium	466	46.6667	0.0351592
MosOpn3	1	Atrium	467	46.7778	0.0338394
MosOpn3	1	Atrium	468	46.8889	0.031911
MosOpn3	1	Atrium	469	47	0.0313238
MosOpn3	1	Atrium	470	47.1111	0.0299125
MosOpn3	1	Atrium	471	47.2222	0.0290452
MosOpn3	1	Atrium	472	47.3333	0.0281995
MosOpn3	1	Atrium	473	47.4444	0.02737
MosOpn3	1	Atrium	474	47.5556	0.0271491
MosOpn3	1	Atrium	475	47.6667	0.0264111
MosOpn3	1	Atrium	476	47.7778	0.0257647
MosOpn3	1	Atrium	477	47.8889	0.0255977
MosOpn3	1	Atrium	478	48	0.0247197
MosOpn3	1	Atrium	479	48.1111	0.024348
MosOpn3	1	Atrium	480	48.2222	0.0241918
MosOpn3	1	Atrium	481	48.3333	0.0505814
MosOpn3	1	Atrium	482	48.4444	0.132637
MosOpn3	1	Atrium	483	48.5556	0.109
MosOpn3	1	Atrium	484	48.6667	0.0949949
MosOpn3	1	Atrium	485	48.7778	0.0841676
MosOpn3	1	Atrium	486	48.8889	0.075091
MosOpn3	1	Atrium	487	49	0.0676681
MosOpn3	1	Atrium	488	49.1111	0.0614087
MosOpn3	1	Atrium	489	49.2222	0.0554402
MosOpn3	1	Atrium	490	49.3333	0.0510231
MosOpn3	1	Atrium	491	49.4444	0.0472524
MosOpn3	1	Atrium	492	49.5556	0.0438318
MosOpn3	1	Atrium	493	49.6667	0.0401042
MosOpn3	1	Atrium	494	49.7778	0.038709
MosOpn3	1	Atrium	495	49.8889	0.036215
MosOpn3	1	Atrium	496	50	0.0347175
MosOpn3	1	Atrium	497	50.1111	0.0325951
MosOpn3	1	Atrium	498	50.2222	0.0317978
MosOpn3	1	Atrium	499	50.3333	0.0308552
MosOpn3	1	Atrium	500	50.4444	0.0298694
MosOpn3	1	Atrium	501	50.5556	0.028889
MosOpn3	1	Atrium	502	50.6667	0.0281618
MosOpn3	1	Atrium	503	50.7778	0.0276231
MosOpn3	1	Atrium	504	50.8889	0.0270414
MosOpn3	1	Atrium	505	51	0.0266912
MosOpn3	1	Atrium	506	51.1111	0.0281887
MosOpn3	1	Atrium	507	51.2222	0.079298
MosOpn3	1	Atrium	508	51.3333	0.119634
MosOpn3	1	Atrium	509	51.4444	0.101028
MosOpn3	1	Atrium	510	51.5556	0.0885362
MosOpn3	1	Atrium	511	51.6667	0.078587
MosOpn3	1	Atrium	512	51.7778	0.0710078
MosOpn3	1	Atrium	513	51.8889	0.0637088
MosOpn3	1	Atrium	514	52	0.057708
MosOpn3	1	Atrium	515	52.1111	0.0527414
MosOpn3	1	Atrium	516	52.2222	0.0484913
MosOpn3	1	Atrium	517	52.3333	0.0449738
MosOpn3	1	Atrium	518	52.4444	0.0411115
MosOpn3	1	Atrium	519	52.5556	0.039183
MosOpn3	1	Atrium	520	52.6667	0.0369691
MosOpn3	1	Atrium	521	52.7778	0.0349545
MosOpn3	1	Atrium	522	52.8889	0.0333061
MosOpn3	1	Atrium	523	53	0.0320887
MosOpn3	1	Atrium	524	53.1111	0.0305912
MosOpn3	1	Atrium	525	53.2222	0.0298263
MosOpn3	1	Atrium	526	53.3333	0.028819
MosOpn3	1	Atrium	527	53.4444	0.0283557
MosOpn3	1	Atrium	528	53.5556	0.0272892
MosOpn3	1	Atrium	529	53.6667	0.0269175
MosOpn3	1	Atrium	530	53.7778	0.0449684
MosOpn3	1	Atrium	531	53.8889	0.13943
MosOpn3	1	Atrium	532	54	0.118734
MosOpn3	1	Atrium	533	54.1111	0.104255
MosOpn3	1	Atrium	534	54.2222	0.090971
MosOpn3	1	Atrium	535	54.3333	0.081722
MosOpn3	1	Atrium	536	54.4444	0.0730494
MosOpn3	1	Atrium	537	54.5556	0.0656857
MosOpn3	1	Atrium	538	54.6667	0.0597496
MosOpn3	1	Atrium	539	54.7778	0.0543952
MosOpn3	1	Atrium	540	54.8889	0.0499834
MosOpn3	1	Atrium	541	55	0.0460188
MosOpn3	1	Atrium	542	55.1111	0.0432285
MosOpn3	1	Atrium	543	55.2222	0.0403627
MosOpn3	1	Atrium	544	55.3333	0.0380895
MosOpn3	1	Atrium	545	55.4444	0.0359564
MosOpn3	1	Atrium	546	55.5556	0.0341896
MosOpn3	1	Atrium	547	55.6667	0.0327675
MosOpn3	1	Atrium	548	55.7778	0.0319756
MosOpn3	1	Atrium	549	55.8889	0.0309037
MosOpn3	1	Atrium	550	56	0.0300903
MosOpn3	1	Atrium	551	56.1111	0.0293523
MosOpn3	1	Atrium	552	56.2222	0.0476241
MosOpn3	1	Atrium	553	56.3333	0.131506
MosOpn3	1	Atrium	554	56.4444	0.116316
MosOpn3	1	Atrium	555	56.5556	0.101314
MosOpn3	1	Atrium	556	56.6667	0.0895058
MosOpn3	1	Atrium	557	56.7778	0.0797936
MosOpn3	1	Atrium	558	56.8889	0.0718482
MosOpn3	1	Atrium	559	57	0.0647107
MosOpn3	1	Atrium	560	57.1111	0.0588769
MosOpn3	1	Atrium	561	57.2222	0.0536302
MosOpn3	1	Atrium	562	57.3333	0.0492293
MosOpn3	1	Atrium	563	57.4444	0.0460296
MosOpn3	1	Atrium	564	57.5556	0.0424851
MosOpn3	1	Atrium	565	57.6667	0.0398241
MosOpn3	1	Atrium	566	57.7778	0.0376047
MosOpn3	1	Atrium	567	57.8889	0.0356925
MosOpn3	1	Atrium	568	58	0.0341734
MosOpn3	1	Atrium	569	58.1111	0.0329452
MosOpn3	1	Atrium	570	58.2222	0.0317763
MosOpn3	1	Atrium	571	58.3333	0.0307744
MosOpn3	1	Atrium	572	58.4444	0.0296162
MosOpn3	1	Atrium	573	58.5556	0.0535872
MosOpn3	1	Atrium	574	58.6667	0.137733
MosOpn3	1	Atrium	575	58.7778	0.114457
MosOpn3	1	Atrium	576	58.8889	0.100371
MosOpn3	1	Atrium	577	59	0.0888433
MosOpn3	1	Atrium	578	59.1111	0.0788563
MosOpn3	1	Atrium	579	59.2222	0.0709701
MosOpn3	1	Atrium	580	59.3333	0.0642206
MosOpn3	1	Atrium	581	59.4444	0.0585214
MosOpn3	1	Atrium	582	59.5556	0.0532101
MosOpn3	1	Atrium	583	59.6667	0.0492832
MosOpn3	1	Atrium	584	59.7778	0.0456363
MosOpn3	1	Atrium	585	59.8889	0.0426683
MosOpn3	1	Atrium	586	60	0.039921
MosOpn3	1	Atrium	587	60.1111	0.0370876
MosOpn3	1	Atrium	588	60.2222	0.0358864
MosOpn3	1	Atrium	589	60.3333	0.0337101
MosOpn3	1	Atrium	590	60.4444	0.032886
MosOpn3	1	Atrium	591	60.5556	0.0317978
MosOpn3	1	Atrium	592	60.6667	0.0304404
MosOpn3	1	Atrium	593	60.7778	0.0323742
MosOpn3	1	Atrium	594	60.8889	0.0958568
MosOpn3	1	Atrium	595	61	0.125355
MosOpn3	1	Atrium	596	61.1111	0.106803
MosOpn3	1	Atrium	597	61.2222	0.093826
MosOpn3	1	Atrium	598	61.3333	0.0833865
MosOpn3	1	Atrium	599	61.4444	0.0743099
MosOpn3	1	Atrium	600	61.5556	0.0667631
MosOpn3	1	Atrium	601	61.6667	0.0610208
MosOpn3	1	Atrium	602	61.7778	0.0555479
MosOpn3	1	Atrium	603	61.8889	0.0508561
MosOpn3	1	Atrium	604	62	0.0470315
MosOpn3	1	Atrium	605	62.1111	0.0438857
MosOpn3	1	Atrium	606	62.2222	0.0411223
MosOpn3	1	Atrium	607	62.3333	0.0390053
MosOpn3	1	Atrium	608	62.4444	0.0368344
MosOpn3	1	Atrium	609	62.5556	0.0349545
MosOpn3	1	Atrium	610	62.6667	0.0330422
MosOpn3	1	Atrium	611	62.7778	0.0312646
MosOpn3	1	Atrium	612	62.8889	0.0302465
MosOpn3	1	Atrium	613	63	0.0292769
MosOpn3	1	Atrium	614	63.1111	0.0381811
MosOpn3	1	Atrium	615	63.2222	0.122979
MosOpn3	1	Atrium	616	63.3333	0.116569
MosOpn3	1	Atrium	617	63.4444	0.100958
MosOpn3	1	Atrium	618	63.5556	0.089425
MosOpn3	1	Atrium	619	63.6667	0.0793626
MosOpn3	1	Atrium	620	63.7778	0.0711371
MosOpn3	1	Atrium	621	63.8889	0.0637411
MosOpn3	1	Atrium	622	64	0.0581928
MosOpn3	1	Atrium	623	64.1111	0.0533286
MosOpn3	1	Atrium	624	64.2222	0.0489223
MosOpn3	1	Atrium	625	64.3333	0.0452647
MosOpn3	1	Atrium	626	64.4444	0.0412246
MosOpn3	1	Atrium	627	64.5556	0.0391346
MosOpn3	1	Atrium	628	64.6667	0.0372223
MosOpn3	1	Atrium	629	64.7778	0.0347929
MosOpn3	1	Atrium	630	64.8889	0.0334246
MosOpn3	1	Atrium	631	65	0.0320941
MosOpn3	1	Atrium	632	65.1111	0.0309252
MosOpn3	1	Atrium	633	65.2222	0.0290829
MosOpn3	1	Atrium	634	65.3333	0.0287166
MosOpn3	1	Atrium	635	65.4444	0.0278602
MosOpn3	1	Atrium	636	65.5556	0.0272191
MosOpn3	1	Atrium	637	65.6667	0.0380034
MosOpn3	1	Atrium	638	65.7778	0.126685
MosOpn3	1	Atrium	639	65.8889	0.113116
MosOpn3	1	Atrium	640	66	0.0982108
MosOpn3	1	Atrium	641	66.1111	0.0868987
MosOpn3	1	Atrium	642	66.2222	0.0772349
MosOpn3	1	Atrium	643	66.3333	0.0690902
MosOpn3	1	Atrium	644	66.4444	0.0620335
MosOpn3	1	Atrium	645	66.5556	0.0562105
MosOpn3	1	Atrium	646	66.6667	0.0537003
MosOpn3	1	Atrium	647	66.7778	0.0710455
MosOpn3	1	Atrium	648	66.8889	0.154955
MosOpn3	1	Atrium	649	67	0.129545
MosOpn3	1	Atrium	650	67.1111	0.112847
MosOpn3	1	Atrium	651	67.2222	0.100037
MosOpn3	1	Atrium	652	67.3333	0.0882723
MosOpn3	1	Atrium	653	67.4444	0.0852719
MosOpn3	1	Atrium	654	67.5556	0.149035
MosOpn3	1	Atrium	655	67.6667	0.166719
MosOpn3	1	Atrium	656	67.7778	0.142339
MosOpn3	1	Atrium	657	67.8889	0.125182
MosOpn3	1	Atrium	658	68	0.111004
MosOpn3	1	Atrium	659	68.1111	0.128113
MosOpn3	1	Atrium	660	68.2222	0.204895
MosOpn3	1	Atrium	661	68.3333	0.172117
MosOpn3	1	Atrium	662	68.4444	0.150306
MosOpn3	1	Atrium	663	68.5556	0.133849
MosOpn3	1	Atrium	664	68.6667	0.146939
MosOpn3	1	Atrium	665	68.7778	0.222682
MosOpn3	1	Atrium	666	68.8889	0.190599
MosOpn3	1	Atrium	667	69	0.167888
MosOpn3	1	Atrium	668	69.1111	0.149207
MosOpn3	1	Atrium	669	69.2222	0.180924
MosOpn3	1	Atrium	670	69.3333	0.232809
MosOpn3	1	Atrium	671	69.4444	0.19271
MosOpn3	1	Atrium	672	69.5556	0.170991
MosOpn3	1	Atrium	673	69.6667	0.169456
MosOpn3	1	Atrium	674	69.7778	0.240921
MosOpn3	1	Atrium	675	69.8889	0.22112
MosOpn3	1	Atrium	676	70	0.19473
MosOpn3	1	Atrium	677	70.1111	0.176345
MosOpn3	1	Atrium	678	70.2222	0.221454
MosOpn3	1	Atrium	679	70.3333	0.250752
MosOpn3	1	Atrium	680	70.4444	0.210217
MosOpn3	1	Atrium	681	70.5556	0.187986
MosOpn3	1	Atrium	682	70.6667	0.21186
MosOpn3	1	Atrium	683	70.7778	0.273527
MosOpn3	1	Atrium	684	70.8889	0.22872
MosOpn3	1	Atrium	685	71	0.202218
MosOpn3	1	Atrium	686	71.1111	0.216272
MosOpn3	1	Atrium	687	71.2222	0.28095
MosOpn3	1	Atrium	688	71.3333	0.237032
MosOpn3	1	Atrium	689	71.4444	0.209694
MosOpn3	1	Atrium	690	71.5556	0.220565
MosOpn3	1	Atrium	691	71.6667	0.287587
MosOpn3	1	Atrium	692	71.7778	0.248781
MosOpn3	1	Atrium	693	71.8889	0.221109
MosOpn3	1	Atrium	694	72	0.231565
MosOpn3	1	Atrium	695	72.1111	0.297428
MosOpn3	1	Atrium	696	72.2222	0.255536
MosOpn3	1	Atrium	697	72.3333	0.226722
MosOpn3	1	Atrium	698	72.4444	0.242246
MosOpn3	1	Atrium	699	72.5556	0.303267
MosOpn3	1	Atrium	700	72.6667	0.25664
MosOpn3	1	Atrium	701	72.7778	0.231635
MosOpn3	1	Atrium	702	72.8889	0.25615
MosOpn3	1	Atrium	703	73	0.30609
MosOpn3	1	Atrium	704	73.1111	0.25601
MosOpn3	1	Atrium	705	73.2222	0.23115
MosOpn3	1	Atrium	706	73.3333	0.26883
MosOpn3	1	Atrium	707	73.4444	0.302492
MosOpn3	1	Atrium	708	73.5556	0.252896
MosOpn3	1	Atrium	709	73.6667	0.23658
MosOpn3	1	Atrium	710	73.7778	0.286472
MosOpn3	1	Atrium	711	73.8889	0.297924
MosOpn3	1	Atrium	712	74	0.254437
MosOpn3	1	Atrium	713	74.1111	0.251738
MosOpn3	1	Atrium	714	74.2222	0.309941
MosOpn3	1	Atrium	715	74.3333	0.289289
MosOpn3	1	Atrium	716	74.4444	0.25351
MosOpn3	1	Atrium	717	74.5556	0.269584
MosOpn3	1	Atrium	718	74.6667	0.329237
MosOpn3	1	Atrium	719	74.7778	0.280131
MosOpn3	1	Atrium	720	74.8889	0.252848
MosOpn3	1	Atrium	721	75	0.28924
MosOpn3	1	Atrium	722	75.1111	0.327987
MosOpn3	1	Atrium	723	75.2222	0.272989
MosOpn3	1	Atrium	724	75.3333	0.26277
MosOpn3	1	Atrium	725	75.4444	0.316034
MosOpn3	1	Atrium	726	75.5556	0.306408
MosOpn3	1	Atrium	727	75.6667	0.267241
MosOpn3	1	Atrium	728	75.7778	0.277907
MosOpn3	1	Atrium	729	75.8889	0.33729
MosOpn3	1	Atrium	730	76	0.285707
MosOpn3	1	Atrium	731	76.1111	0.259963
MosOpn3	1	Atrium	732	76.2222	0.29794
MosOpn3	1	Atrium	733	76.3333	0.331526
MosOpn3	1	Atrium	734	76.4444	0.277691
MosOpn3	1	Atrium	735	76.5556	0.268431
MosOpn3	1	Atrium	736	76.6667	0.326371
MosOpn3	1	Atrium	737	76.7778	0.310205
MosOpn3	1	Atrium	738	76.8889	0.270898
MosOpn3	1	Atrium	739	77	0.291411
MosOpn3	1	Atrium	740	77.1111	0.346307
MosOpn3	1	Atrium	741	77.2222	0.294029
MosOpn3	1	Atrium	742	77.3333	0.271496
MosOpn3	1	Atrium	743	77.4444	0.311401
MosOpn3	1	Atrium	744	77.5556	0.334909
MosOpn3	1	Atrium	745	77.6667	0.282825
MosOpn3	1	Atrium	746	77.7778	0.285734
MosOpn3	1	Atrium	747	77.8889	0.345402
MosOpn3	1	Atrium	748	78	0.307781
MosOpn3	1	Atrium	749	78.1111	0.276657
MosOpn3	1	Atrium	750	78.2222	0.309349
MosOpn3	1	Atrium	751	78.3333	0.349868
MosOpn3	1	Atrium	752	78.4444	0.290291
MosOpn3	1	Atrium	753	78.5556	0.281909
MosOpn3	1	Atrium	754	78.6667	0.338146
MosOpn3	1	Atrium	755	78.7778	0.321124
MosOpn3	1	Atrium	756	78.8889	0.283401
MosOpn3	1	Atrium	757	79	0.317149
MosOpn3	1	Atrium	758	79.1111	0.36647
MosOpn3	1	Atrium	759	79.2222	0.303973
MosOpn3	1	Atrium	760	79.3333	0.285852
MosOpn3	1	Atrium	761	79.4444	0.332614
MosOpn3	1	Atrium	762	79.5556	0.338448
MosOpn3	1	Atrium	763	79.6667	0.290005
MosOpn3	1	Atrium	764	79.7778	0.303445
MosOpn3	1	Atrium	765	79.8889	0.35881
MosOpn3	1	Atrium	766	80	0.311687
MosOpn3	1	Atrium	767	80.1111	0.286364
MosOpn3	1	Atrium	768	80.2222	0.327723
MosOpn3	1	Atrium	769	80.3333	0.35192
MosOpn3	1	Atrium	770	80.4444	0.295602
MosOpn3	1	Atrium	771	80.5556	0.300455
MosOpn3	1	Atrium	772	80.6667	0.356919
MosOpn3	1	Atrium	773	80.7778	0.317472
MosOpn3	1	Atrium	774	80.8889	0.285249
MosOpn3	1	Atrium	775	81	0.322142
MosOpn3	1	Atrium	776	81.1111	0.356865
MosOpn3	1	Atrium	777	81.2222	0.300752
MosOpn3	2	Ventricle	1	-5	0.0291423
MosOpn3	2	Ventricle	2	-4.88889	0.0290912
MosOpn3	2	Ventricle	3	-4.77778	0.0291525
MosOpn3	2	Ventricle	4	-4.66667	0.0290605
MosOpn3	2	Ventricle	5	-4.55556	0.0292036
MosOpn3	2	Ventricle	6	-4.44444	0.0289225
MosOpn3	2	Ventricle	7	-4.33333	0.0291168
MosOpn3	2	Ventricle	8	-4.22222	0.0289941
MosOpn3	2	Ventricle	9	-4.11111	0.0291014
MosOpn3	2	Ventricle	10	-4	0.029127
MosOpn3	2	Ventricle	11	-3.88889	0.0291014
MosOpn3	2	Ventricle	12	-3.77778	0.0291628
MosOpn3	2	Ventricle	13	-3.66667	0.0290452
MosOpn3	2	Ventricle	14	-3.55556	0.029035
MosOpn3	2	Ventricle	15	-3.44444	0.0291474
MosOpn3	2	Ventricle	16	-3.33333	0.0290094
MosOpn3	2	Ventricle	17	-3.22222	0.0289225
MosOpn3	2	Ventricle	18	-3.11111	0.0291372
MosOpn3	2	Ventricle	19	-3	0.029127
MosOpn3	2	Ventricle	20	-2.88889	0.0291423
MosOpn3	2	Ventricle	21	-2.77778	0.0291372
MosOpn3	2	Ventricle	22	-2.66667	0.029081
MosOpn3	2	Ventricle	23	-2.55556	0.0291065
MosOpn3	2	Ventricle	24	-2.44444	0.0292139
MosOpn3	2	Ventricle	25	-2.33333	0.0290861
MosOpn3	2	Ventricle	26	-2.22222	0.0290554
MosOpn3	2	Ventricle	27	-2.11111	0.0291219
MosOpn3	2	Ventricle	28	-2	0.0290657
MosOpn3	2	Ventricle	29	-1.88889	0.0292241
MosOpn3	2	Ventricle	30	-1.77778	0.0291168
MosOpn3	2	Ventricle	31	-1.66667	0.0291628
MosOpn3	2	Ventricle	32	-1.55556	0.0291525
MosOpn3	2	Ventricle	33	-1.44444	0.0290299
MosOpn3	2	Ventricle	34	-1.33333	0.0290503
MosOpn3	2	Ventricle	35	-1.22222	0.0292139
MosOpn3	2	Ventricle	36	-1.11111	0.0291525
MosOpn3	2	Ventricle	37	-1	0.0292139
MosOpn3	2	Ventricle	38	-0.888889	0.0290452
MosOpn3	2	Ventricle	39	-0.777778	0.0292292
MosOpn3	2	Ventricle	40	-0.666667	0.0291321
MosOpn3	2	Ventricle	41	-0.555556	0.029127
MosOpn3	2	Ventricle	42	-0.444444	0.0290299
MosOpn3	2	Ventricle	43	-0.333333	0.0292139
MosOpn3	2	Ventricle	44	-0.222222	0.0293876
MosOpn3	2	Ventricle	45	-0.111111	0.0305989
MosOpn3	2	Ventricle	46	0	0.0349636
MosOpn3	2	Ventricle	47	0.111111	0.65328
MosOpn3	2	Ventricle	48	0.222222	0.879794
MosOpn3	2	Ventricle	49	0.333333	0.727127
MosOpn3	2	Ventricle	50	0.444444	0.752068
MosOpn3	2	Ventricle	51	0.555556	0.647468
MosOpn3	2	Ventricle	52	0.666667	0.643927
MosOpn3	2	Ventricle	53	0.777778	0.588172
MosOpn3	2	Ventricle	54	0.888889	0.579248
MosOpn3	2	Ventricle	55	1	0.592056
MosOpn3	2	Ventricle	56	1.11111	0.523693
MosOpn3	2	Ventricle	57	1.22222	0.588765
MosOpn3	2	Ventricle	58	1.33333	0.526708
MosOpn3	2	Ventricle	59	1.44444	0.497837
MosOpn3	2	Ventricle	60	1.55556	0.517534
MosOpn3	2	Ventricle	61	1.66667	0.443155
MosOpn3	2	Ventricle	62	1.77778	0.46159
MosOpn3	2	Ventricle	63	1.88889	0.457527
MosOpn3	2	Ventricle	64	2	0.437835
MosOpn3	2	Ventricle	65	2.11111	0.448532
MosOpn3	2	Ventricle	66	2.22222	0.395568
MosOpn3	2	Ventricle	67	2.33333	0.408442
MosOpn3	2	Ventricle	68	2.44444	0.408759
MosOpn3	2	Ventricle	69	2.55556	0.3602
MosOpn3	2	Ventricle	70	2.66667	0.378232
MosOpn3	2	Ventricle	71	2.77778	0.415562
MosOpn3	2	Ventricle	72	2.88889	0.367274
MosOpn3	2	Ventricle	73	3	0.333593
MosOpn3	2	Ventricle	74	3.11111	0.398394
MosOpn3	2	Ventricle	75	3.22222	0.385949
MosOpn3	2	Ventricle	76	3.33333	0.429749
MosOpn3	2	Ventricle	77	3.44444	0.415224
MosOpn3	2	Ventricle	78	3.55556	0.357292
MosOpn3	2	Ventricle	79	3.66667	0.362746
MosOpn3	2	Ventricle	80	3.77778	0.392915
MosOpn3	2	Ventricle	81	3.88889	0.353413
MosOpn3	2	Ventricle	82	4	0.317841
MosOpn3	2	Ventricle	83	4.11111	0.285694
MosOpn3	2	Ventricle	84	4.22222	0.257339
MosOpn3	2	Ventricle	85	4.33333	0.249585
MosOpn3	2	Ventricle	86	4.44444	0.23436
MosOpn3	2	Ventricle	87	4.55556	0.223351
MosOpn3	2	Ventricle	88	4.66667	0.221813
MosOpn3	2	Ventricle	89	4.77778	0.212721
MosOpn3	2	Ventricle	90	4.88889	0.209761
MosOpn3	2	Ventricle	91	5	0.20234
MosOpn3	2	Ventricle	92	5.11111	0.198303
MosOpn3	2	Ventricle	93	5.22222	0.209981
MosOpn3	2	Ventricle	94	5.33333	0.206506
MosOpn3	2	Ventricle	95	5.44444	0.203802
MosOpn3	2	Ventricle	96	5.55556	0.200664
MosOpn3	2	Ventricle	97	5.66667	0.201252
MosOpn3	2	Ventricle	98	5.77778	0.196667
MosOpn3	2	Ventricle	99	5.88889	0.194362
MosOpn3	2	Ventricle	100	6	0.194378
MosOpn3	2	Ventricle	101	6.11111	0.192987
MosOpn3	2	Ventricle	102	6.22222	0.190038
MosOpn3	2	Ventricle	103	6.33333	0.189742
MosOpn3	2	Ventricle	104	6.44444	0.178079
MosOpn3	2	Ventricle	105	6.55556	0.173704
MosOpn3	2	Ventricle	106	6.66667	0.173362
MosOpn3	2	Ventricle	107	6.77778	0.171792
MosOpn3	2	Ventricle	108	6.88889	0.171869
MosOpn3	2	Ventricle	109	7	0.170443
MosOpn3	2	Ventricle	110	7.11111	0.171205
MosOpn3	2	Ventricle	111	7.22222	0.171031
MosOpn3	2	Ventricle	112	7.33333	0.170464
MosOpn3	2	Ventricle	113	7.44444	0.169385
MosOpn3	2	Ventricle	114	7.55556	0.163038
MosOpn3	2	Ventricle	115	7.66667	0.162348
MosOpn3	2	Ventricle	116	7.77778	0.160819
MosOpn3	2	Ventricle	117	7.88889	0.161474
MosOpn3	2	Ventricle	118	8	0.165097
MosOpn3	2	Ventricle	119	8.11111	0.166288
MosOpn3	2	Ventricle	120	8.22222	0.166533
MosOpn3	2	Ventricle	121	8.33333	0.165537
MosOpn3	2	Ventricle	122	8.44444	0.161392
MosOpn3	2	Ventricle	123	8.55556	0.160549
MosOpn3	2	Ventricle	124	8.66667	0.159317
MosOpn3	2	Ventricle	125	8.77778	0.163876
MosOpn3	2	Ventricle	126	8.88889	0.165153
MosOpn3	2	Ventricle	127	9	0.163901
MosOpn3	2	Ventricle	128	9.11111	0.161336
MosOpn3	2	Ventricle	129	9.22222	0.166697
MosOpn3	2	Ventricle	130	9.33333	0.166196
MosOpn3	2	Ventricle	131	9.44444	0.166584
MosOpn3	2	Ventricle	132	9.55556	0.156889
MosOpn3	2	Ventricle	133	9.66667	0.156986
MosOpn3	2	Ventricle	134	9.77778	0.153306
MosOpn3	2	Ventricle	135	9.88889	0.152463
MosOpn3	2	Ventricle	136	10	0.152131
MosOpn3	2	Ventricle	137	10.1111	0.159981
MosOpn3	2	Ventricle	138	10.2222	0.158366
MosOpn3	2	Ventricle	139	10.3333	0.165189
MosOpn3	2	Ventricle	140	10.4444	0.158177
MosOpn3	2	Ventricle	141	10.5556	0.15601
MosOpn3	2	Ventricle	142	10.6667	0.1558
MosOpn3	2	Ventricle	143	10.7778	0.154257
MosOpn3	2	Ventricle	144	10.8889	0.155105
MosOpn3	2	Ventricle	145	11	0.15737
MosOpn3	2	Ventricle	146	11.1111	0.156751
MosOpn3	2	Ventricle	147	11.2222	0.149059
MosOpn3	2	Ventricle	148	11.3333	0.150761
MosOpn3	2	Ventricle	149	11.4444	0.149034
MosOpn3	2	Ventricle	150	11.5556	0.14957
MosOpn3	2	Ventricle	151	11.6667	0.149029
MosOpn3	2	Ventricle	152	11.7778	0.152468
MosOpn3	2	Ventricle	153	11.8889	0.154482
MosOpn3	2	Ventricle	154	12	0.155233
MosOpn3	2	Ventricle	155	12.1111	0.153981
MosOpn3	2	Ventricle	156	12.2222	0.157395
MosOpn3	2	Ventricle	157	12.3333	0.15876
MosOpn3	2	Ventricle	158	12.4444	0.163538
MosOpn3	2	Ventricle	159	12.5556	0.163748
MosOpn3	2	Ventricle	160	12.6667	0.159976
MosOpn3	2	Ventricle	161	12.7778	0.159613
MosOpn3	2	Ventricle	162	12.8889	0.159572
MosOpn3	2	Ventricle	163	13	0.153904
MosOpn3	2	Ventricle	164	13.1111	0.154456
MosOpn3	2	Ventricle	165	13.2222	0.147638
MosOpn3	2	Ventricle	166	13.3333	0.147955
MosOpn3	2	Ventricle	167	13.4444	0.150526
MosOpn3	2	Ventricle	168	13.5556	0.150276
MosOpn3	2	Ventricle	169	13.6667	0.153935
MosOpn3	2	Ventricle	170	13.7778	0.155616
MosOpn3	2	Ventricle	171	13.8889	0.154329
MosOpn3	2	Ventricle	172	14	0.153925
MosOpn3	2	Ventricle	173	14.1111	0.154492
MosOpn3	2	Ventricle	174	14.2222	0.155841
MosOpn3	2	Ventricle	175	14.3333	0.157313
MosOpn3	2	Ventricle	176	14.4444	0.158473
MosOpn3	2	Ventricle	177	14.5556	0.159123
MosOpn3	2	Ventricle	178	14.6667	0.154017
MosOpn3	2	Ventricle	179	14.7778	0.157937
MosOpn3	2	Ventricle	180	14.8889	0.158714
MosOpn3	2	Ventricle	181	15	0.160211
MosOpn3	2	Ventricle	182	15.1111	0.160124
MosOpn3	2	Ventricle	183	15.2222	0.160078
MosOpn3	2	Ventricle	184	15.3333	0.16062
MosOpn3	2	Ventricle	185	15.4444	0.159419
MosOpn3	2	Ventricle	186	15.5556	0.159894
MosOpn3	2	Ventricle	187	15.6667	0.154998
MosOpn3	2	Ventricle	188	15.7778	0.157436
MosOpn3	2	Ventricle	189	15.8889	0.160748
MosOpn3	2	Ventricle	190	16	0.165
MosOpn3	2	Ventricle	191	16.1111	0.163722
MosOpn3	2	Ventricle	192	16.2222	0.164187
MosOpn3	2	Ventricle	193	16.3333	0.160993
MosOpn3	2	Ventricle	194	16.4444	0.15831
MosOpn3	2	Ventricle	195	16.5556	0.160058
MosOpn3	2	Ventricle	196	16.6667	0.160671
MosOpn3	2	Ventricle	197	16.7778	0.16867
MosOpn3	2	Ventricle	198	16.8889	0.167239
MosOpn3	2	Ventricle	199	17	0.164525
MosOpn3	2	Ventricle	200	17.1111	0.163084
MosOpn3	2	Ventricle	201	17.2222	0.189282
MosOpn3	2	Ventricle	202	17.3333	0.221644
MosOpn3	2	Ventricle	203	17.4444	0.202979
MosOpn3	2	Ventricle	204	17.5556	0.188888
MosOpn3	2	Ventricle	205	17.6667	0.178365
MosOpn3	2	Ventricle	206	17.7778	0.169257
MosOpn3	2	Ventricle	207	17.8889	0.164351
MosOpn3	2	Ventricle	208	18	0.162363
MosOpn3	2	Ventricle	209	18.1111	0.164576
MosOpn3	2	Ventricle	210	18.2222	0.161729
MosOpn3	2	Ventricle	211	18.3333	0.15509
MosOpn3	2	Ventricle	212	18.4444	0.153955
MosOpn3	2	Ventricle	213	18.5556	0.152478
MosOpn3	2	Ventricle	214	18.6667	0.151947
MosOpn3	2	Ventricle	215	18.7778	0.151574
MosOpn3	2	Ventricle	216	18.8889	0.151492
MosOpn3	2	Ventricle	217	19	0.157651
MosOpn3	2	Ventricle	218	19.1111	0.160692
MosOpn3	2	Ventricle	219	19.2222	0.161683
MosOpn3	2	Ventricle	220	19.3333	0.160881
MosOpn3	2	Ventricle	221	19.4444	0.163559
MosOpn3	2	Ventricle	222	19.5556	0.168429
MosOpn3	2	Ventricle	223	19.6667	0.162434
MosOpn3	2	Ventricle	224	19.7778	0.159179
MosOpn3	2	Ventricle	225	19.8889	0.158422
MosOpn3	2	Ventricle	226	20	0.158019
MosOpn3	2	Ventricle	227	20.1111	0.156956
MosOpn3	2	Ventricle	228	20.2222	0.158627
MosOpn3	2	Ventricle	229	20.3333	0.156276
MosOpn3	2	Ventricle	230	20.4444	0.154676
MosOpn3	2	Ventricle	231	20.5556	0.154058
MosOpn3	2	Ventricle	232	20.6667	0.155059
MosOpn3	2	Ventricle	233	20.7778	0.164141
MosOpn3	2	Ventricle	234	20.8889	0.166216
MosOpn3	2	Ventricle	235	21	0.193064
MosOpn3	2	Ventricle	236	21.1111	0.220939
MosOpn3	2	Ventricle	237	21.2222	0.21155
MosOpn3	2	Ventricle	238	21.3333	0.201824
MosOpn3	2	Ventricle	239	21.4444	0.223975
MosOpn3	2	Ventricle	240	21.5556	0.271664
MosOpn3	2	Ventricle	241	21.6667	0.257553
MosOpn3	2	Ventricle	242	21.7778	0.246846
MosOpn3	2	Ventricle	243	21.8889	0.296902
MosOpn3	2	Ventricle	244	22	0.311867
MosOpn3	2	Ventricle	245	22.1111	0.278784
MosOpn3	2	Ventricle	246	22.2222	0.307671
MosOpn3	2	Ventricle	247	22.3333	0.353551
MosOpn3	2	Ventricle	248	22.4444	0.317228
MosOpn3	2	Ventricle	249	22.5556	0.325784
MosOpn3	2	Ventricle	250	22.6667	0.362562
MosOpn3	2	Ventricle	251	22.7778	0.330649
MosOpn3	2	Ventricle	252	22.8889	0.331038
MosOpn3	2	Ventricle	253	23	0.367233
MosOpn3	2	Ventricle	254	23.1111	0.33023
MosOpn3	2	Ventricle	255	23.2222	0.340697
MosOpn3	2	Ventricle	256	23.3333	0.402856
MosOpn3	2	Ventricle	257	23.4444	0.365357
MosOpn3	2	Ventricle	258	23.5556	0.388351
MosOpn3	2	Ventricle	259	23.6667	0.404052
MosOpn3	2	Ventricle	260	23.7778	0.364396
MosOpn3	2	Ventricle	261	23.8889	0.403198
MosOpn3	2	Ventricle	262	24	0.407706
MosOpn3	2	Ventricle	263	24.1111	0.368138
MosOpn3	2	Ventricle	264	24.2222	0.416057
MosOpn3	2	Ventricle	265	24.3333	0.402008
MosOpn3	2	Ventricle	266	24.4444	0.372277
MosOpn3	2	Ventricle	267	24.5556	0.426622
MosOpn3	2	Ventricle	268	24.6667	0.401394
MosOpn3	2	Ventricle	269	24.7778	0.386215
MosOpn3	2	Ventricle	270	24.8889	0.422988
MosOpn3	2	Ventricle	271	25	0.381687
MosOpn3	2	Ventricle	272	25.1111	0.391755
MosOpn3	2	Ventricle	273	25.2222	0.414243
MosOpn3	2	Ventricle	274	25.3333	0.377593
MosOpn3	2	Ventricle	275	25.4444	0.401711
MosOpn3	2	Ventricle	276	25.5556	0.393084
MosOpn3	2	Ventricle	277	25.6667	0.349825
MosOpn3	2	Ventricle	278	25.7778	0.401982
MosOpn3	2	Ventricle	279	25.8889	0.375973
MosOpn3	2	Ventricle	280	26	0.359301
MosOpn3	2	Ventricle	281	26.1111	0.389931
MosOpn3	2	Ventricle	282	26.2222	0.376985
MosOpn3	2	Ventricle	283	26.3333	0.380833
MosOpn3	2	Ventricle	284	26.4444	0.395323
MosOpn3	2	Ventricle	285	26.5556	0.356444
MosOpn3	2	Ventricle	286	26.6667	0.382929
MosOpn3	2	Ventricle	287	26.7778	0.368817
MosOpn3	2	Ventricle	288	26.8889	0.341449
MosOpn3	2	Ventricle	289	27	0.3823
MosOpn3	2	Ventricle	290	27.1111	0.362505
MosOpn3	2	Ventricle	291	27.2222	0.354313
MosOpn3	2	Ventricle	292	27.3333	0.368674
MosOpn3	2	Ventricle	293	27.4444	0.336716
MosOpn3	2	Ventricle	294	27.5556	0.342133
MosOpn3	2	Ventricle	295	27.6667	0.348021
MosOpn3	2	Ventricle	296	27.7778	0.324532
MosOpn3	2	Ventricle	297	27.8889	0.373693
MosOpn3	2	Ventricle	298	28	0.362378
MosOpn3	2	Ventricle	299	28.1111	0.334442
MosOpn3	2	Ventricle	300	28.2222	0.371644
MosOpn3	2	Ventricle	301	28.3333	0.344285
MosOpn3	2	Ventricle	302	28.4444	0.34014
MosOpn3	2	Ventricle	303	28.5556	0.371644
MosOpn3	2	Ventricle	304	28.6667	0.344495
MosOpn3	2	Ventricle	305	28.7778	0.355846
MosOpn3	2	Ventricle	306	28.8889	0.349176
MosOpn3	2	Ventricle	307	29	0.33206
MosOpn3	2	Ventricle	308	29.1111	0.367964
MosOpn3	2	Ventricle	309	29.2222	0.365679
MosOpn3	2	Ventricle	310	29.3333	0.323969
MosOpn3	2	Ventricle	311	29.4444	0.36204
MosOpn3	2	Ventricle	312	29.5556	0.342706
MosOpn3	2	Ventricle	313	29.6667	0.341152
MosOpn3	2	Ventricle	314	29.7778	0.370008
MosOpn3	2	Ventricle	315	29.8889	0.354793
MosOpn3	2	Ventricle	316	30	0.373663
MosOpn3	2	Ventricle	317	30.1111	0.3763
MosOpn3	2	Ventricle	318	30.2222	0.345854
MosOpn3	2	Ventricle	319	30.3333	0.386603
MosOpn3	2	Ventricle	320	30.4444	0.365909
MosOpn3	2	Ventricle	321	30.5556	0.359142
MosOpn3	2	Ventricle	322	30.6667	0.406474
MosOpn3	2	Ventricle	323	30.7778	0.368541
MosOpn3	2	Ventricle	324	30.8889	0.367432
MosOpn3	2	Ventricle	325	31	0.390375
MosOpn3	2	Ventricle	326	31.1111	0.37056
MosOpn3	2	Ventricle	327	31.2222	0.402248
MosOpn3	2	Ventricle	328	31.3333	0.393866
MosOpn3	2	Ventricle	329	31.4444	0.373606
MosOpn3	2	Ventricle	330	31.5556	0.415511
MosOpn3	2	Ventricle	331	31.6667	0.396718
MosOpn3	2	Ventricle	332	31.7778	0.37745
MosOpn3	2	Ventricle	333	31.8889	0.416553
MosOpn3	2	Ventricle	334	32	0.382116
MosOpn3	2	Ventricle	335	32.1111	0.379939
MosOpn3	2	Ventricle	336	32.2222	0.39473
MosOpn3	2	Ventricle	337	32.3333	0.359372
MosOpn3	2	Ventricle	338	32.4444	0.387615
MosOpn3	2	Ventricle	339	32.5556	0.388346
MosOpn3	2	Ventricle	340	32.6667	0.352989
MosOpn3	2	Ventricle	341	32.7778	0.388188
MosOpn3	2	Ventricle	342	32.8889	0.369375
MosOpn3	2	Ventricle	343	33	0.348962
MosOpn3	2	Ventricle	344	33.1111	0.384395
MosOpn3	2	Ventricle	345	33.2222	0.35742
MosOpn3	2	Ventricle	346	33.3333	0.363211
MosOpn3	2	Ventricle	347	33.4444	0.379479
MosOpn3	2	Ventricle	348	33.5556	0.356383
MosOpn3	2	Ventricle	349	33.6667	0.382959
MosOpn3	2	Ventricle	350	33.7778	0.384273
MosOpn3	2	Ventricle	351	33.8889	0.356689
MosOpn3	2	Ventricle	352	34	0.39795
MosOpn3	2	Ventricle	353	34.1111	0.391546
MosOpn3	2	Ventricle	354	34.2222	0.374511
MosOpn3	2	Ventricle	355	34.3333	0.42078
MosOpn3	2	Ventricle	356	34.4444	0.388326
MosOpn3	2	Ventricle	357	34.5556	0.385361
MosOpn3	2	Ventricle	358	34.6667	0.395123
MosOpn3	2	Ventricle	359	34.7778	0.363911
MosOpn3	2	Ventricle	360	34.8889	0.377925
MosOpn3	2	Ventricle	361	35	0.361325
MosOpn3	2	Ventricle	362	35.1111	0.333879
MosOpn3	2	Ventricle	363	35.2222	0.364545
MosOpn3	2	Ventricle	364	35.3333	0.34475
MosOpn3	2	Ventricle	365	35.4444	0.328308
MosOpn3	2	Ventricle	366	35.5556	0.372027
MosOpn3	2	Ventricle	367	35.6667	0.350377
MosOpn3	2	Ventricle	368	35.7778	0.341029
MosOpn3	2	Ventricle	369	35.8889	0.371271
MosOpn3	2	Ventricle	370	36	0.342205
MosOpn3	2	Ventricle	371	36.1111	0.345358
MosOpn3	2	Ventricle	372	36.2222	0.358223
MosOpn3	2	Ventricle	373	36.3333	0.347198
MosOpn3	2	Ventricle	374	36.4444	0.370949
MosOpn3	2	Ventricle	375	36.5556	0.374
MosOpn3	2	Ventricle	376	36.6667	0.336726
MosOpn3	2	Ventricle	377	36.7778	0.365005
MosOpn3	2	Ventricle	378	36.8889	0.35302
MosOpn3	2	Ventricle	379	37	0.322625
MosOpn3	2	Ventricle	380	37.1111	0.367407
MosOpn3	2	Ventricle	381	37.2222	0.34543
MosOpn3	2	Ventricle	382	37.3333	0.327021
MosOpn3	2	Ventricle	383	37.4444	0.357246
MosOpn3	2	Ventricle	384	37.5556	0.348834
MosOpn3	2	Ventricle	385	37.6667	0.343084
MosOpn3	2	Ventricle	386	37.7778	0.365322
MosOpn3	2	Ventricle	387	37.8889	0.347086
MosOpn3	2	Ventricle	388	38	0.356117
MosOpn3	2	Ventricle	389	38.1111	0.347715
MosOpn3	2	Ventricle	390	38.2222	0.318306
MosOpn3	2	Ventricle	391	38.3333	0.351185
MosOpn3	2	Ventricle	392	38.4444	0.352892
MosOpn3	2	Ventricle	393	38.5556	0.326576
MosOpn3	2	Ventricle	394	38.6667	0.370586
MosOpn3	2	Ventricle	395	38.7778	0.34289
MosOpn3	2	Ventricle	396	38.8889	0.317151
MosOpn3	2	Ventricle	397	39	0.361831
MosOpn3	2	Ventricle	398	39.1111	0.326187
MosOpn3	2	Ventricle	399	39.2222	0.310558
MosOpn3	2	Ventricle	400	39.3333	0.348967
MosOpn3	2	Ventricle	401	39.4444	0.329172
MosOpn3	2	Ventricle	402	39.5556	0.315695
MosOpn3	2	Ventricle	403	39.6667	0.337866
MosOpn3	2	Ventricle	404	39.7778	0.316323
MosOpn3	2	Ventricle	405	39.8889	0.340656
MosOpn3	2	Ventricle	406	40	0.363569
MosOpn3	2	Ventricle	407	40.1111	0.336486
MosOpn3	2	Ventricle	408	40.2222	0.349427
MosOpn3	2	Ventricle	409	40.3333	0.355631
MosOpn3	2	Ventricle	410	40.4444	0.326177
MosOpn3	2	Ventricle	411	40.5556	0.35951
MosOpn3	2	Ventricle	412	40.6667	0.339614
MosOpn3	2	Ventricle	413	40.7778	0.314857
MosOpn3	2	Ventricle	414	40.8889	0.350669
MosOpn3	2	Ventricle	415	41	0.337764
MosOpn3	2	Ventricle	416	41.1111	0.31685
MosOpn3	2	Ventricle	417	41.2222	0.355923
MosOpn3	2	Ventricle	418	41.3333	0.350439
MosOpn3	2	Ventricle	419	41.4444	0.341474
MosOpn3	2	Ventricle	420	41.5556	0.379693
MosOpn3	2	Ventricle	421	41.6667	0.356955
MosOpn3	2	Ventricle	422	41.7778	0.333297
MosOpn3	2	Ventricle	423	41.8889	0.358447
MosOpn3	2	Ventricle	424	42	0.334201
MosOpn3	2	Ventricle	425	42.1111	0.332208
MosOpn3	2	Ventricle	426	42.2222	0.353699
MosOpn3	2	Ventricle	427	42.3333	0.316037
MosOpn3	2	Ventricle	428	42.4444	0.319186
MosOpn3	2	Ventricle	429	42.5556	0.332878
MosOpn3	2	Ventricle	430	42.6667	0.312582
MosOpn3	2	Ventricle	431	42.7778	0.331518
MosOpn3	2	Ventricle	432	42.8889	0.350255
MosOpn3	2	Ventricle	433	43	0.322538
MosOpn3	2	Ventricle	434	43.1111	0.344714
MosOpn3	2	Ventricle	435	43.2222	0.341673
MosOpn3	2	Ventricle	436	43.3333	0.313022
MosOpn3	2	Ventricle	437	43.4444	0.340723
MosOpn3	2	Ventricle	438	43.5556	0.328641
MosOpn3	2	Ventricle	439	43.6667	0.285694
MosOpn3	2	Ventricle	440	43.7778	0.319114
MosOpn3	2	Ventricle	441	43.8889	0.29127
MosOpn3	2	Ventricle	442	44	0.271859
MosOpn3	2	Ventricle	443	44.1111	0.302723
MosOpn3	2	Ventricle	444	44.2222	0.293166
MosOpn3	2	Ventricle	445	44.3333	0.275492
[truncated: 1,109 more rows]

## Sheet: B
Line	Sample_number	Range	Frame	X	Y
PufTMT	1	Atrium	1	-5	0.0649256
PufTMT	1	Atrium	2	-4.88889	0.0645116
PufTMT	1	Atrium	3	-4.77778	0.0638849
PufTMT	1	Atrium	4	-4.66667	0.0645116
PufTMT	1	Atrium	5	-4.55556	0.0633366
PufTMT	1	Atrium	6	-4.44444	0.0643549
PufTMT	1	Atrium	7	-4.33333	0.0639073
PufTMT	1	Atrium	8	-4.22222	0.0638066
PufTMT	1	Atrium	9	-4.11111	0.0639633
PufTMT	1	Atrium	10	-4	0.0641087
PufTMT	1	Atrium	11	-3.88889	0.0637506
PufTMT	1	Atrium	12	-3.77778	0.0634149
PufTMT	1	Atrium	13	-3.66667	0.0634597
PufTMT	1	Atrium	14	-3.55556	0.0641087
PufTMT	1	Atrium	15	-3.44444	0.0640304
PufTMT	1	Atrium	16	-3.33333	0.0632918
PufTMT	1	Atrium	17	-3.22222	0.063303
PufTMT	1	Atrium	18	-3.11111	0.0630904
PufTMT	1	Atrium	19	-3	0.064478
PufTMT	1	Atrium	20	-2.88889	0.0640752
PufTMT	1	Atrium	21	-2.77778	0.0640304
PufTMT	1	Atrium	22	-2.66667	0.0630345
PufTMT	1	Atrium	23	-2.55556	0.0639297
PufTMT	1	Atrium	24	-2.44444	0.0646011
PufTMT	1	Atrium	25	-2.33333	0.0637506
PufTMT	1	Atrium	26	-2.22222	0.0640528
PufTMT	1	Atrium	27	-2.11111	0.0635045
PufTMT	1	Atrium	28	-2	0.0641199
PufTMT	1	Atrium	29	-1.88889	0.0650375
PufTMT	1	Atrium	30	-1.77778	0.0639856
PufTMT	1	Atrium	31	-1.66667	0.0635492
PufTMT	1	Atrium	32	-1.55556	0.0640192
PufTMT	1	Atrium	33	-1.44444	0.0632807
PufTMT	1	Atrium	34	-1.33333	0.0628554
PufTMT	1	Atrium	35	-1.22222	0.0637954
PufTMT	1	Atrium	36	-1.11111	0.0638849
PufTMT	1	Atrium	37	-1	0.0642878
PufTMT	1	Atrium	38	-0.888889	0.0643213
PufTMT	1	Atrium	39	-0.777778	0.0640975
PufTMT	1	Atrium	40	-0.666667	0.0645228
PufTMT	1	Atrium	41	-0.555556	0.0638849
PufTMT	1	Atrium	42	-0.444444	0.0643437
PufTMT	1	Atrium	43	-0.333333	0.0636164
PufTMT	1	Atrium	44	-0.222222	0.0632918
PufTMT	1	Atrium	45	-0.111111	0.0639968
PufTMT	1	Atrium	46	0	0.064064
PufTMT	1	Atrium	47	0.111111	0.747562
PufTMT	1	Atrium	48	0.222222	2.18639
PufTMT	1	Atrium	49	0.333333	2.04555
PufTMT	1	Atrium	50	0.444444	1.95313
PufTMT	1	Atrium	51	0.555556	1.75705
PufTMT	1	Atrium	52	0.666667	1.53729
PufTMT	1	Atrium	53	0.777778	1.4583
PufTMT	1	Atrium	54	0.888889	1.45076
PufTMT	1	Atrium	55	1	1.2197
PufTMT	1	Atrium	56	1.11111	1.11254
PufTMT	1	Atrium	57	1.22222	1.25011
PufTMT	1	Atrium	58	1.33333	1.05436
PufTMT	1	Atrium	59	1.44444	0.920955
PufTMT	1	Atrium	60	1.55556	0.82464
PufTMT	1	Atrium	61	1.66667	0.916971
PufTMT	1	Atrium	62	1.77778	0.864108
PufTMT	1	Atrium	63	1.88889	0.74181
PufTMT	1	Atrium	64	2	0.685837
PufTMT	1	Atrium	65	2.11111	0.813238
PufTMT	1	Atrium	66	2.22222	0.733966
PufTMT	1	Atrium	67	2.33333	0.655914
PufTMT	1	Atrium	68	2.44444	0.586658
PufTMT	1	Atrium	69	2.55556	0.531513
PufTMT	1	Atrium	70	2.66667	0.489259
PufTMT	1	Atrium	71	2.77778	0.598979
PufTMT	1	Atrium	72	2.88889	0.571081
PufTMT	1	Atrium	73	3	0.509121
PufTMT	1	Atrium	74	3.11111	0.463062
PufTMT	1	Atrium	75	3.22222	0.427265
PufTMT	1	Atrium	76	3.33333	0.395384
PufTMT	1	Atrium	77	3.44444	0.36771
PufTMT	1	Atrium	78	3.55556	0.344535
PufTMT	1	Atrium	79	3.66667	0.325937
PufTMT	1	Atrium	80	3.77778	0.308044
PufTMT	1	Atrium	81	3.88889	0.293519
PufTMT	1	Atrium	82	4	0.278883
PufTMT	1	Atrium	83	4.11111	0.269203
PufTMT	1	Atrium	84	4.22222	0.260933
PufTMT	1	Atrium	85	4.33333	0.251231
PufTMT	1	Atrium	86	4.44444	0.243555
PufTMT	1	Atrium	87	4.55556	0.239258
PufTMT	1	Atrium	88	4.66667	0.234536
PufTMT	1	Atrium	89	4.77778	0.231514
PufTMT	1	Atrium	90	4.88889	0.225147
PufTMT	1	Atrium	91	5	0.221947
PufTMT	1	Atrium	92	5.11111	0.218455
PufTMT	1	Atrium	93	5.22222	0.215356
PufTMT	1	Atrium	94	5.33333	0.210398
PufTMT	1	Atrium	95	5.44444	0.207545
PufTMT	1	Atrium	96	5.55556	0.202733
PufTMT	1	Atrium	97	5.66667	0.19904
PufTMT	1	Atrium	98	5.77778	0.198
PufTMT	1	Atrium	99	5.88889	0.195929
PufTMT	1	Atrium	100	6	0.193501
PufTMT	1	Atrium	101	6.11111	0.191576
PufTMT	1	Atrium	102	6.22222	0.191274
PufTMT	1	Atrium	103	6.33333	0.188678
PufTMT	1	Atrium	104	6.44444	0.189215
PufTMT	1	Atrium	105	6.55556	0.187973
PufTMT	1	Atrium	106	6.66667	0.185545
PufTMT	1	Atrium	107	6.77778	0.185836
PufTMT	1	Atrium	108	6.88889	0.185153
PufTMT	1	Atrium	109	7	0.183699
PufTMT	1	Atrium	110	7.11111	0.183273
PufTMT	1	Atrium	111	7.22222	0.182826
PufTMT	1	Atrium	112	7.33333	0.183822
PufTMT	1	Atrium	113	7.44444	0.182143
PufTMT	1	Atrium	114	7.55556	0.182076
PufTMT	1	Atrium	115	7.66667	0.181035
PufTMT	1	Atrium	116	7.77778	0.180756
PufTMT	1	Atrium	117	7.88889	0.180465
PufTMT	1	Atrium	118	8	0.180554
PufTMT	1	Atrium	119	8.11111	0.179346
PufTMT	1	Atrium	120	8.22222	0.178215
PufTMT	1	Atrium	121	8.33333	0.177936
PufTMT	1	Atrium	122	8.44444	0.179245
PufTMT	1	Atrium	123	8.55556	0.178137
PufTMT	1	Atrium	124	8.66667	0.176772
PufTMT	1	Atrium	125	8.77778	0.17572
PufTMT	1	Atrium	126	8.88889	0.176
PufTMT	1	Atrium	127	9	0.175698
PufTMT	1	Atrium	128	9.11111	0.176794
PufTMT	1	Atrium	129	9.22222	0.175977
PufTMT	1	Atrium	130	9.33333	0.176369
PufTMT	1	Atrium	131	9.44444	0.174444
PufTMT	1	Atrium	132	9.55556	0.174579
PufTMT	1	Atrium	133	9.66667	0.173762
PufTMT	1	Atrium	134	9.77778	0.174746
PufTMT	1	Atrium	135	9.88889	0.173874
PufTMT	1	Atrium	136	10	0.233551
PufTMT	1	Atrium	137	10.1111	0.310148
PufTMT	1	Atrium	138	10.2222	0.272885
PufTMT	1	Atrium	139	10.3333	0.256457
PufTMT	1	Atrium	140	10.4444	0.32032
PufTMT	1	Atrium	141	10.5556	0.386309
PufTMT	1	Atrium	142	10.6667	0.337161
PufTMT	1	Atrium	143	10.7778	0.312375
PufTMT	1	Atrium	144	10.8889	0.287376
PufTMT	1	Atrium	145	11	0.429424
PufTMT	1	Atrium	146	11.1111	0.413109
PufTMT	1	Atrium	147	11.2222	0.371
PufTMT	1	Atrium	148	11.3333	0.377983
PufTMT	1	Atrium	149	11.4444	0.506458
PufTMT	1	Atrium	150	11.5556	0.451189
PufTMT	1	Atrium	151	11.6667	0.407369
PufTMT	1	Atrium	152	11.7778	0.374011
PufTMT	1	Atrium	153	11.8889	0.34618
PufTMT	1	Atrium	154	12	0.322894
PufTMT	1	Atrium	155	12.1111	0.298521
PufTMT	1	Atrium	156	12.2222	0.278692
PufTMT	1	Atrium	157	12.3333	0.265432
PufTMT	1	Atrium	158	12.4444	0.253649
PufTMT	1	Atrium	159	12.5556	0.243779
PufTMT	1	Atrium	160	12.6667	0.23448
PufTMT	1	Atrium	161	12.7778	0.227284
PufTMT	1	Atrium	162	12.8889	0.222238
PufTMT	1	Atrium	163	13	0.214404
PufTMT	1	Atrium	164	13.1111	0.210656
PufTMT	1	Atrium	165	13.2222	0.207578
PufTMT	1	Atrium	166	13.3333	0.205139
PufTMT	1	Atrium	167	13.4444	0.201782
PufTMT	1	Atrium	168	13.5556	0.198212
PufTMT	1	Atrium	169	13.6667	0.1965
PufTMT	1	Atrium	170	13.7778	0.194352
PufTMT	1	Atrium	171	13.8889	0.191543
PufTMT	1	Atrium	172	14	0.190424
PufTMT	1	Atrium	173	14.1111	0.1902
PufTMT	1	Atrium	174	14.2222	0.187425
PufTMT	1	Atrium	175	14.3333	0.187447
PufTMT	1	Atrium	176	14.4444	0.185579
PufTMT	1	Atrium	177	14.5556	0.182165
PufTMT	1	Atrium	178	14.6667	0.179681
PufTMT	1	Atrium	179	14.7778	0.180185
PufTMT	1	Atrium	180	14.8889	0.178932
PufTMT	1	Atrium	181	15	0.17798
PufTMT	1	Atrium	182	15.1111	0.176403
PufTMT	1	Atrium	183	15.2222	0.176335
PufTMT	1	Atrium	184	15.3333	0.175317
PufTMT	1	Atrium	185	15.4444	0.175563
PufTMT	1	Atrium	186	15.5556	0.172531
PufTMT	1	Atrium	187	15.6667	0.173504
PufTMT	1	Atrium	188	15.7778	0.174321
PufTMT	1	Atrium	189	15.8889	0.174254
PufTMT	1	Atrium	190	16	0.173236
PufTMT	1	Atrium	191	16.1111	0.174399
PufTMT	1	Atrium	192	16.2222	0.174948
PufTMT	1	Atrium	193	16.3333	0.175877
PufTMT	1	Atrium	194	16.4444	0.175854
PufTMT	1	Atrium	195	16.5556	0.175753
PufTMT	1	Atrium	196	16.6667	0.175933
PufTMT	1	Atrium	197	16.7778	0.175518
PufTMT	1	Atrium	198	16.8889	0.275917
PufTMT	1	Atrium	199	17	0.286749
PufTMT	1	Atrium	200	17.1111	0.259714
PufTMT	1	Atrium	201	17.2222	0.359049
PufTMT	1	Atrium	202	17.3333	0.370418
PufTMT	1	Atrium	203	17.4444	0.328948
PufTMT	1	Atrium	204	17.5556	0.430476
PufTMT	1	Atrium	205	17.6667	0.440022
PufTMT	1	Atrium	206	17.7778	0.382627
PufTMT	1	Atrium	207	17.8889	0.485443
PufTMT	1	Atrium	208	18	0.507801
PufTMT	1	Atrium	209	18.1111	0.448571
PufTMT	1	Atrium	210	18.2222	0.402669
PufTMT	1	Atrium	211	18.3333	0.511941
PufTMT	1	Atrium	212	18.4444	0.530259
PufTMT	1	Atrium	213	18.5556	0.472361
PufTMT	1	Atrium	214	18.6667	0.596293
PufTMT	1	Atrium	215	18.7778	0.610325
PufTMT	1	Atrium	216	18.8889	0.554229
PufTMT	1	Atrium	217	19	0.629707
PufTMT	1	Atrium	218	19.1111	0.659283
PufTMT	1	Atrium	219	19.2222	0.599773
PufTMT	1	Atrium	220	19.3333	0.538518
PufTMT	1	Atrium	221	19.4444	0.515354
PufTMT	1	Atrium	222	19.5556	0.609732
PufTMT	1	Atrium	223	19.6667	0.580336
PufTMT	1	Atrium	224	19.7778	0.507555
PufTMT	1	Atrium	225	19.8889	0.604014
PufTMT	1	Atrium	226	20	0.607942
PufTMT	1	Atrium	227	20.1111	0.552562
PufTMT	1	Atrium	228	20.2222	0.500203
PufTMT	1	Atrium	229	20.3333	0.586367
PufTMT	1	Atrium	230	20.4444	0.569548
PufTMT	1	Atrium	231	20.5556	0.510788
PufTMT	1	Atrium	232	20.6667	0.584554
PufTMT	1	Atrium	233	20.7778	0.57652
PufTMT	1	Atrium	234	20.8889	0.521643
PufTMT	1	Atrium	235	21	0.601854
PufTMT	1	Atrium	236	21.1111	0.590754
PufTMT	1	Atrium	237	21.2222	0.519696
PufTMT	1	Atrium	238	21.3333	0.593932
PufTMT	1	Atrium	239	21.4444	0.590944
PufTMT	1	Atrium	240	21.5556	0.534814
PufTMT	1	Atrium	241	21.6667	0.49463
PufTMT	1	Atrium	242	21.7778	0.576811
PufTMT	1	Atrium	243	21.8889	0.542815
PufTMT	1	Atrium	244	22	0.518353
PufTMT	1	Atrium	245	22.1111	0.599874
PufTMT	1	Atrium	246	22.2222	0.550402
PufTMT	1	Atrium	247	22.3333	0.600355
PufTMT	1	Atrium	248	22.4444	0.603354
PufTMT	1	Atrium	249	22.5556	0.531468
PufTMT	1	Atrium	250	22.6667	0.539659
PufTMT	1	Atrium	251	22.7778	0.57699
PufTMT	1	Atrium	252	22.8889	0.52124
PufTMT	1	Atrium	253	23	0.535966
PufTMT	1	Atrium	254	23.1111	0.568899
PufTMT	1	Atrium	255	23.2222	0.520916
PufTMT	1	Atrium	256	23.3333	0.473413
PufTMT	1	Atrium	257	23.4444	0.466173
PufTMT	1	Atrium	258	23.5556	0.488139
PufTMT	1	Atrium	259	23.6667	0.441051
PufTMT	1	Atrium	260	23.7778	0.395563
PufTMT	1	Atrium	261	23.8889	0.446087
PufTMT	1	Atrium	262	24	0.412785
PufTMT	1	Atrium	263	24.1111	0.375879
PufTMT	1	Atrium	264	24.2222	0.386857
PufTMT	1	Atrium	265	24.3333	0.433822
PufTMT	1	Atrium	266	24.4444	0.383959
PufTMT	2	Atrium	1	-5	0.0662136
PufTMT	2	Atrium	2	-4.88889	0.0661107
PufTMT	2	Atrium	3	-4.77778	0.0662304
PufTMT	2	Atrium	4	-4.66667	0.0662472
PufTMT	2	Atrium	5	-4.55556	0.0662024
PufTMT	2	Atrium	6	-4.44444	0.0661028
PufTMT	2	Atrium	7	-4.33333	0.0662505
PufTMT	2	Atrium	8	-4.22222	0.0663143
PufTMT	2	Atrium	9	-4.11111	0.0664307
PufTMT	2	Atrium	10	-4	0.0663602
PufTMT	2	Atrium	11	-3.88889	0.0661722
PufTMT	2	Atrium	12	-3.77778	0.0661924
PufTMT	2	Atrium	13	-3.66667	0.0663434
PufTMT	2	Atrium	14	-3.55556	0.0662483
PufTMT	2	Atrium	15	-3.44444	0.0661812
PufTMT	2	Atrium	16	-3.33333	0.066302
PufTMT	2	Atrium	17	-3.22222	0.0662505
PufTMT	2	Atrium	18	-3.11111	0.0663345
PufTMT	2	Atrium	19	-3	0.0661957
PufTMT	2	Atrium	20	-2.88889	0.0662987
PufTMT	2	Atrium	21	-2.77778	0.06618
PufTMT	2	Atrium	22	-2.66667	0.0663389
PufTMT	2	Atrium	23	-2.55556	0.0662796
PufTMT	2	Atrium	24	-2.44444	0.0663199
PufTMT	2	Atrium	25	-2.33333	0.066311
PufTMT	2	Atrium	26	-2.22222	0.0661431
PufTMT	2	Atrium	27	-2.11111	0.0662953
PufTMT	2	Atrium	28	-2	0.06633
PufTMT	2	Atrium	29	-1.88889	0.0662326
PufTMT	2	Atrium	30	-1.77778	0.0661174
PufTMT	2	Atrium	31	-1.66667	0.066321
PufTMT	2	Atrium	32	-1.55556	0.0660905
PufTMT	2	Atrium	33	-1.44444	0.0663009
PufTMT	2	Atrium	34	-1.33333	0.0661677
PufTMT	2	Atrium	35	-1.22222	0.0663882
PufTMT	2	Atrium	36	-1.11111	0.0662147
PufTMT	2	Atrium	37	-1	0.0662159
PufTMT	2	Atrium	38	-0.888889	0.0662987
PufTMT	2	Atrium	39	-0.777778	0.0663132
PufTMT	2	Atrium	40	-0.666667	0.0661521
PufTMT	2	Atrium	41	-0.555556	0.0661353
PufTMT	2	Atrium	42	-0.444444	0.0663043
PufTMT	2	Atrium	43	-0.333333	0.0661924
PufTMT	2	Atrium	44	-0.222222	0.0662259
PufTMT	2	Atrium	45	-0.111111	0.0663557
PufTMT	2	Atrium	46	0	0.548984
PufTMT	2	Atrium	47	0.111111	0.965596
PufTMT	2	Atrium	48	0.222222	0.917611
PufTMT	2	Atrium	49	0.333333	0.834031
PufTMT	2	Atrium	50	0.444444	0.749867
PufTMT	2	Atrium	51	0.555556	0.675753
PufTMT	2	Atrium	52	0.666667	0.613375
PufTMT	2	Atrium	53	0.777778	0.559952
PufTMT	2	Atrium	54	0.888889	0.514085
PufTMT	2	Atrium	55	1	0.474632
PufTMT	2	Atrium	56	1.11111	0.440654
PufTMT	2	Atrium	57	1.22222	0.410005
PufTMT	2	Atrium	58	1.33333	0.383202
PufTMT	2	Atrium	59	1.44444	0.360042
PufTMT	2	Atrium	60	1.55556	0.338938
PufTMT	2	Atrium	61	1.66667	0.321013
PufTMT	2	Atrium	62	1.77778	0.304499
PufTMT	2	Atrium	63	1.88889	0.290048
PufTMT	2	Atrium	64	2	0.276471
PufTMT	2	Atrium	65	2.11111	0.265474
PufTMT	2	Atrium	66	2.22222	0.256426
PufTMT	2	Atrium	67	2.33333	0.246855
PufTMT	2	Atrium	68	2.44444	0.239269
PufTMT	2	Atrium	69	2.55556	0.232163
PufTMT	2	Atrium	70	2.66667	0.225093
PufTMT	2	Atrium	71	2.77778	0.219894
PufTMT	2	Atrium	72	2.88889	0.215278
PufTMT	2	Atrium	73	3	0.210782
PufTMT	2	Atrium	74	3.11111	0.206078
PufTMT	2	Atrium	75	3.22222	0.20293
PufTMT	2	Atrium	76	3.33333	0.199237
PufTMT	2	Atrium	77	3.44444	0.196599
PufTMT	2	Atrium	78	3.55556	0.193715
PufTMT	2	Atrium	79	3.66667	0.19102
PufTMT	2	Atrium	80	3.77778	0.189072
PufTMT	2	Atrium	81	3.88889	0.186444
PufTMT	2	Atrium	82	4	0.184772
PufTMT	2	Atrium	83	4.11111	0.183455
PufTMT	2	Atrium	84	4.22222	0.181793
PufTMT	2	Atrium	85	4.33333	0.179876
PufTMT	2	Atrium	86	4.44444	0.199789
PufTMT	2	Atrium	87	4.55556	0.258493
PufTMT	2	Atrium	88	4.66667	0.282459
PufTMT	2	Atrium	89	4.77778	0.27387
PufTMT	2	Atrium	90	4.88889	0.291295
PufTMT	2	Atrium	91	5	0.330763
PufTMT	2	Atrium	92	5.11111	0.33005
PufTMT	2	Atrium	93	5.22222	0.349677
PufTMT	2	Atrium	94	5.33333	0.382737
PufTMT	2	Atrium	95	5.44444	0.356003
PufTMT	2	Atrium	96	5.55556	0.334114
PufTMT	2	Atrium	97	5.66667	0.318149
PufTMT	2	Atrium	98	5.77778	0.299114
PufTMT	2	Atrium	99	5.88889	0.282071
PufTMT	2	Atrium	100	6	0.272308
PufTMT	2	Atrium	101	6.11111	0.294153
PufTMT	2	Atrium	102	6.22222	0.331068
PufTMT	2	Atrium	103	6.33333	0.328377
PufTMT	2	Atrium	104	6.44444	0.3445
PufTMT	2	Atrium	105	6.55556	0.373648
PufTMT	2	Atrium	106	6.66667	0.35995
PufTMT	2	Atrium	107	6.77778	0.384978
PufTMT	2	Atrium	108	6.88889	0.398217
PufTMT	2	Atrium	109	7	0.380473
PufTMT	2	Atrium	110	7.11111	0.406811
PufTMT	2	Atrium	111	7.22222	0.407024
PufTMT	2	Atrium	112	7.33333	0.390911
PufTMT	2	Atrium	113	7.44444	0.419861
PufTMT	2	Atrium	114	7.55556	0.410347
PufTMT	2	Atrium	115	7.66667	0.403282
PufTMT	2	Atrium	116	7.77778	0.429807
PufTMT	2	Atrium	117	7.88889	0.41122
PufTMT	2	Atrium	118	8	0.411992
PufTMT	2	Atrium	119	8.11111	0.430966
PufTMT	2	Atrium	120	8.22222	0.408692
PufTMT	2	Atrium	121	8.33333	0.413183
PufTMT	2	Atrium	122	8.44444	0.430136
PufTMT	2	Atrium	123	8.55556	0.405341
PufTMT	2	Atrium	124	8.66667	0.416998
PufTMT	2	Atrium	125	8.77778	0.432339
PufTMT	2	Atrium	126	8.88889	0.404841
PufTMT	2	Atrium	127	9	0.428031
PufTMT	2	Atrium	128	9.11111	0.429639
PufTMT	2	Atrium	129	9.22222	0.408644
PufTMT	2	Atrium	130	9.33333	0.433448
PufTMT	2	Atrium	131	9.44444	0.419587
PufTMT	2	Atrium	132	9.55556	0.415718
PufTMT	2	Atrium	133	9.66667	0.436601
PufTMT	2	Atrium	134	9.77778	0.411125
PufTMT	2	Atrium	135	9.88889	0.42427
PufTMT	2	Atrium	136	10	0.434694
PufTMT	2	Atrium	137	10.1111	0.406918
PufTMT	2	Atrium	138	10.2222	0.430462
PufTMT	2	Atrium	139	10.3333	0.427771
PufTMT	2	Atrium	140	10.4444	0.411013
PufTMT	2	Atrium	141	10.5556	0.434485
PufTMT	2	Atrium	142	10.6667	0.416619
PufTMT	2	Atrium	143	10.7778	0.418439
PufTMT	2	Atrium	144	10.8889	0.437112
PufTMT	2	Atrium	145	11	0.407593
PufTMT	2	Atrium	146	11.1111	0.427257
PufTMT	2	Atrium	147	11.2222	0.429824
PufTMT	2	Atrium	148	11.3333	0.404241
PufTMT	2	Atrium	149	11.4444	0.429855
PufTMT	2	Atrium	150	11.5556	0.420008
PufTMT	2	Atrium	151	11.6667	0.41415
PufTMT	2	Atrium	152	11.7778	0.437395
PufTMT	2	Atrium	153	11.8889	0.409539
PufTMT	2	Atrium	154	12	0.426516
PufTMT	2	Atrium	155	12.1111	0.432797
PufTMT	2	Atrium	156	12.2222	0.405872
PufTMT	2	Atrium	157	12.3333	0.430437
PufTMT	2	Atrium	158	12.4444	0.424032
PufTMT	2	Atrium	159	12.5556	0.407633
PufTMT	2	Atrium	160	12.6667	0.432871
PufTMT	2	Atrium	161	12.7778	0.412085
PufTMT	2	Atrium	162	12.8889	0.417971
PufTMT	2	Atrium	163	13	0.432732
PufTMT	2	Atrium	164	13.1111	0.403608
PufTMT	2	Atrium	165	13.2222	0.418037
PufTMT	2	Atrium	166	13.3333	0.428655
PufTMT	2	Atrium	167	13.4444	0.402891
PufTMT	2	Atrium	168	13.5556	0.428258
PufTMT	2	Atrium	169	13.6667	0.41891
PufTMT	2	Atrium	170	13.7778	0.412778
PufTMT	2	Atrium	171	13.8889	0.433263
PufTMT	2	Atrium	172	14	0.406326
PufTMT	2	Atrium	173	14.1111	0.42373
PufTMT	2	Atrium	174	14.2222	0.431647
PufTMT	2	Atrium	175	14.3333	0.405462
PufTMT	2	Atrium	176	14.4444	0.428689
PufTMT	2	Atrium	177	14.5556	0.4192
PufTMT	2	Atrium	178	14.6667	0.406562
PufTMT	2	Atrium	179	14.7778	0.430786
PufTMT	2	Atrium	180	14.8889	0.41083
PufTMT	2	Atrium	181	15	0.413318
PufTMT	2	Atrium	182	15.1111	0.430626
PufTMT	2	Atrium	183	15.2222	0.403735
PufTMT	2	Atrium	184	15.3333	0.421989
PufTMT	2	Atrium	185	15.4444	0.426218
PufTMT	2	Atrium	186	15.5556	0.406203
PufTMT	2	Atrium	187	15.6667	0.431444
PufTMT	2	Atrium	188	15.7778	0.414051
PufTMT	2	Atrium	189	15.8889	0.415588
PufTMT	2	Atrium	190	16	0.433506
PufTMT	2	Atrium	191	16.1111	0.404796
PufTMT	2	Atrium	192	16.2222	0.425323
PufTMT	2	Atrium	193	16.3333	0.426297
PufTMT	2	Atrium	194	16.4444	0.404571
PufTMT	2	Atrium	195	16.5556	0.430338
PufTMT	2	Atrium	196	16.6667	0.414628
PufTMT	2	Atrium	197	16.7778	0.410888
PufTMT	2	Atrium	198	16.8889	0.430924
PufTMT	2	Atrium	199	17	0.404731
PufTMT	2	Atrium	200	17.1111	0.413729
PufTMT	2	Atrium	201	17.2222	0.425752
PufTMT	2	Atrium	202	17.3333	0.39788
PufTMT	2	Atrium	203	17.4444	0.416773
PufTMT	2	Atrium	204	17.5556	0.423033
PufTMT	2	Atrium	205	17.6667	0.397989
PufTMT	2	Atrium	206	17.7778	0.422219
PufTMT	2	Atrium	207	17.8889	0.414208
PufTMT	2	Atrium	208	18	0.398814
PufTMT	2	Atrium	209	18.1111	0.422052
PufTMT	2	Atrium	210	18.2222	0.406303
PufTMT	2	Atrium	211	18.3333	0.407974
PufTMT	2	Atrium	212	18.4444	0.423935
PufTMT	2	Atrium	213	18.5556	0.397799
PufTMT	2	Atrium	214	18.6667	0.417827
PufTMT	2	Atrium	215	18.7778	0.423029
PufTMT	2	Atrium	216	18.8889	0.396566
PufTMT	2	Atrium	217	19	0.419624
PufTMT	2	Atrium	218	19.1111	0.412429
PufTMT	2	Atrium	219	19.2222	0.403671
PufTMT	2	Atrium	220	19.3333	0.424069
PufTMT	2	Atrium	221	19.4444	0.401957
PufTMT	2	Atrium	222	19.5556	0.414565
PufTMT	2	Atrium	223	19.6667	0.426807
PufTMT	2	Atrium	224	19.7778	0.400847
PufTMT	2	Atrium	225	19.8889	0.423014
PufTMT	2	Atrium	226	20	0.415312
PufTMT	2	Atrium	227	20.1111	0.408677
PufTMT	2	Atrium	228	20.2222	0.428126
PufTMT	2	Atrium	229	20.3333	0.404428
PufTMT	2	Atrium	230	20.4444	0.415731
PufTMT	2	Atrium	231	20.5556	0.42577
PufTMT	2	Atrium	232	20.6667	0.401982
PufTMT	2	Atrium	233	20.7778	0.428275
PufTMT	2	Atrium	234	20.8889	0.41279
PufTMT	2	Atrium	235	21	0.412736
PufTMT	2	Atrium	236	21.1111	0.430146
PufTMT	2	Atrium	237	21.2222	0.403799
PufTMT	2	Atrium	238	21.3333	0.419983
PufTMT	2	Atrium	239	21.4444	0.423682
PufTMT	2	Atrium	240	21.5556	0.403644
PufTMT	2	Atrium	241	21.6667	0.427891
PufTMT	2	Atrium	242	21.7778	0.409945
PufTMT	2	Atrium	243	21.8889	0.415845
PufTMT	2	Atrium	244	22	0.42912
PufTMT	2	Atrium	245	22.1111	0.402643
PufTMT	2	Atrium	246	22.2222	0.423584
PufTMT	2	Atrium	247	22.3333	0.418862
PufTMT	2	Atrium	248	22.4444	0.407139
PufTMT	2	Atrium	249	22.5556	0.426094
PufTMT	2	Atrium	250	22.6667	0.409306
PufTMT	2	Atrium	251	22.7778	0.396849
PufTMT	2	Atrium	252	22.8889	0.419699
PufTMT	2	Atrium	253	23	0.403458
PufTMT	2	Atrium	254	23.1111	0.402342
PufTMT	2	Atrium	255	23.2222	0.4211
PufTMT	2	Atrium	256	23.3333	0.396837
PufTMT	2	Atrium	257	23.4444	0.416531
PufTMT	2	Atrium	258	23.5556	0.415646
PufTMT	2	Atrium	259	23.6667	0.401748
PufTMT	2	Atrium	260	23.7778	0.423447
PufTMT	2	Atrium	261	23.8889	0.407579
PufTMT	2	Atrium	262	24	0.398569
PufTMT	2	Atrium	263	24.1111	0.420856
PufTMT	2	Atrium	264	24.2222	0.396884
PufTMT	2	Atrium	265	24.3333	0.41016
PufTMT	2	Atrium	266	24.4444	0.4203
PufTMT	3	Atrium	1	-5	0.0670003
PufTMT	3	Atrium	2	-4.88889	0.0669913
PufTMT	3	Atrium	3	-4.77778	0.0669634
PufTMT	3	Atrium	4	-4.66667	0.067007
PufTMT	3	Atrium	5	-4.55556	0.0670126
PufTMT	3	Atrium	6	-4.44444	0.0670014
PufTMT	3	Atrium	7	-4.33333	0.0669846
PufTMT	3	Atrium	8	-4.22222	0.0669925
PufTMT	3	Atrium	9	-4.11111	0.0670115
PufTMT	3	Atrium	10	-4	0.0670025
PufTMT	3	Atrium	11	-3.88889	0.0670003
PufTMT	3	Atrium	12	-3.77778	0.0670014
PufTMT	3	Atrium	13	-3.66667	0.0669925
PufTMT	3	Atrium	14	-3.55556	0.0669869
PufTMT	3	Atrium	15	-3.44444	0.0669869
PufTMT	3	Atrium	16	-3.33333	0.066979
PufTMT	3	Atrium	17	-3.22222	0.0669813
PufTMT	3	Atrium	18	-3.11111	0.0669734
PufTMT	3	Atrium	19	-3	0.0669813
PufTMT	3	Atrium	20	-2.88889	0.0669768
PufTMT	3	Atrium	21	-2.77778	0.0669768
PufTMT	3	Atrium	22	-2.66667	0.0669801
PufTMT	3	Atrium	23	-2.55556	0.0669857
PufTMT	3	Atrium	24	-2.44444	0.0670081
PufTMT	3	Atrium	25	-2.33333	0.0670036
PufTMT	3	Atrium	26	-2.22222	0.0670014
PufTMT	3	Atrium	27	-2.11111	0.0669891
PufTMT	3	Atrium	28	-2	0.0669768
PufTMT	3	Atrium	29	-1.88889	0.0669969
PufTMT	3	Atrium	30	-1.77778	0.0669936
PufTMT	3	Atrium	31	-1.66667	0.0670014
PufTMT	3	Atrium	32	-1.55556	0.0669992
PufTMT	3	Atrium	33	-1.44444	0.0670014
PufTMT	3	Atrium	34	-1.33333	0.0669936
PufTMT	3	Atrium	35	-1.22222	0.067007
PufTMT	3	Atrium	36	-1.11111	0.0669947
PufTMT	3	Atrium	37	-1	0.0669947
PufTMT	3	Atrium	38	-0.888889	0.0669846
PufTMT	3	Atrium	39	-0.777778	0.066969
PufTMT	3	Atrium	40	-0.666667	0.0669634
PufTMT	3	Atrium	41	-0.555556	0.0669376
PufTMT	3	Atrium	42	-0.444444	0.0669544
PufTMT	3	Atrium	43	-0.333333	0.0669768
PufTMT	3	Atrium	44	-0.222222	0.0669846
PufTMT	3	Atrium	45	-0.111111	0.067026
PufTMT	3	Atrium	46	0	0.0672017
PufTMT	3	Atrium	47	0.111111	0.101033
PufTMT	3	Atrium	48	0.222222	0.254997
PufTMT	3	Atrium	49	0.333333	0.251532
PufTMT	3	Atrium	50	0.444444	0.291311
PufTMT	3	Atrium	51	0.555556	0.263026
PufTMT	3	Atrium	52	0.666667	0.22261
PufTMT	3	Atrium	53	0.777778	0.211896
PufTMT	3	Atrium	54	0.888889	0.256405
PufTMT	3	Atrium	55	1	0.238957
PufTMT	3	Atrium	56	1.11111	0.205757
PufTMT	3	Atrium	57	1.22222	0.191517
PufTMT	3	Atrium	58	1.33333	0.230459
PufTMT	3	Atrium	59	1.44444	0.222059
PufTMT	3	Atrium	60	1.55556	0.193071
PufTMT	3	Atrium	61	1.66667	0.177939
PufTMT	3	Atrium	62	1.77778	0.210966
PufTMT	3	Atrium	63	1.88889	0.213186
PufTMT	3	Atrium	64	2	0.18732
PufTMT	3	Atrium	65	2.11111	0.170115
PufTMT	3	Atrium	66	2.22222	0.194571
PufTMT	3	Atrium	67	2.33333	0.204789
PufTMT	3	Atrium	68	2.44444	0.183076
PufTMT	3	Atrium	69	2.55556	0.164221
PufTMT	3	Atrium	70	2.66667	0.177554
PufTMT	3	Atrium	71	2.77778	0.1987
PufTMT	3	Atrium	72	2.88889	0.181971
PufTMT	3	Atrium	73	3	0.161581
PufTMT	3	Atrium	74	3.11111	0.162504
PufTMT	3	Atrium	75	3.22222	0.194605
PufTMT	3	Atrium	76	3.33333	0.183771
PufTMT	3	Atrium	77	3.44444	0.162578
PufTMT	3	Atrium	78	3.55556	0.153923
PufTMT	3	Atrium	79	3.66667	0.182736
PufTMT	3	Atrium	80	3.77778	0.130812
PufTMT	3	Atrium	81	3.88889	0.066969
PufTMT	3	Atrium	82	4	0.066979
PufTMT	3	Atrium	83	4.11111	0.0669745
PufTMT	3	Atrium	84	4.22222	0.0669634
PufTMT	3	Atrium	85	4.33333	0.06696
PufTMT	3	Atrium	86	4.44444	0.0669589
PufTMT	3	Atrium	87	4.55556	0.0669387
PufTMT	3	Atrium	88	4.66667	0.0669611
PufTMT	3	Atrium	89	4.77778	0.0669645
PufTMT	3	Atrium	90	4.88889	0.0669533
PufTMT	3	Atrium	91	5	0.0669555
PufTMT	3	Atrium	92	5.11111	0.0669488
PufTMT	3	Atrium	93	5.22222	0.06696
PufTMT	3	Atrium	94	5.33333	0.0669499
PufTMT	3	Atrium	95	5.44444	0.0669723
PufTMT	3	Atrium	96	5.55556	0.0669589
PufTMT	3	Atrium	97	5.66667	0.0669566
PufTMT	3	Atrium	98	5.77778	0.0669544
PufTMT	3	Atrium	99	5.88889	0.066941
PufTMT	3	Atrium	100	6	0.06696
PufTMT	3	Atrium	101	6.11111	0.0669701
PufTMT	3	Atrium	102	6.22222	0.066951
PufTMT	3	Atrium	103	6.33333	0.0669701
PufTMT	3	Atrium	104	6.44444	0.0669578
PufTMT	3	Atrium	105	6.55556	0.0669768
PufTMT	3	Atrium	106	6.66667	0.0669533
PufTMT	3	Atrium	107	6.77778	0.0669734
PufTMT	3	Atrium	108	6.88889	0.0669544
PufTMT	3	Atrium	109	7	0.0669678
PufTMT	3	Atrium	110	7.11111	0.0669712
PufTMT	3	Atrium	111	7.22222	0.0669566
PufTMT	3	Atrium	112	7.33333	0.0669634
PufTMT	3	Atrium	113	7.44444	0.0669578
PufTMT	3	Atrium	114	7.55556	0.0669734
PufTMT	3	Atrium	115	7.66667	0.0669656
PufTMT	3	Atrium	116	7.77778	0.0669801
PufTMT	3	Atrium	117	7.88889	0.0669723
PufTMT	3	Atrium	118	8	0.0669488
PufTMT	3	Atrium	119	8.11111	0.06696
PufTMT	3	Atrium	120	8.22222	0.0669757
PufTMT	3	Atrium	121	8.33333	0.0669522
PufTMT	3	Atrium	122	8.44444	0.0669622
PufTMT	3	Atrium	123	8.55556	0.066979
PufTMT	3	Atrium	124	8.66667	0.0669801
PufTMT	3	Atrium	125	8.77778	0.0669824
PufTMT	3	Atrium	126	8.88889	0.066969
PufTMT	3	Atrium	127	9	0.0670081
PufTMT	3	Atrium	128	9.11111	0.0670126
PufTMT	3	Atrium	129	9.22222	0.0670484
PufTMT	3	Atrium	130	9.33333	0.067016
PufTMT	3	Atrium	131	9.44444	0.0670775
PufTMT	3	Atrium	132	9.55556	0.0755686
PufTMT	3	Atrium	133	9.66667	0.168101
PufTMT	3	Atrium	134	9.77778	0.178935
PufTMT	3	Atrium	135	9.88889	0.16179
PufTMT	3	Atrium	136	10	0.185152
PufTMT	3	Atrium	137	10.1111	0.186501
PufTMT	3	Atrium	138	10.2222	0.167658
PufTMT	3	Atrium	139	10.3333	0.153188
PufTMT	3	Atrium	140	10.4444	0.171649
PufTMT	3	Atrium	141	10.5556	0.179002
PufTMT	3	Atrium	142	10.6667	0.163695
PufTMT	3	Atrium	143	10.7778	0.148746
PufTMT	3	Atrium	144	10.8889	0.161859
PufTMT	3	Atrium	145	11	0.174331
PufTMT	3	Atrium	146	11.1111	0.145403
PufTMT	3	Atrium	147	11.2222	0.0670003
PufTMT	3	Atrium	148	11.3333	0.0669768
PufTMT	3	Atrium	149	11.4444	0.0669936
PufTMT	3	Atrium	150	11.5556	0.0669992
PufTMT	3	Atrium	151	11.6667	0.0670003
PufTMT	3	Atrium	152	11.7778	0.067007
PufTMT	3	Atrium	153	11.8889	0.0669891
PufTMT	3	Atrium	154	12	0.0670036
PufTMT	3	Atrium	155	12.1111	0.0670327
PufTMT	3	Atrium	156	12.2222	0.0742124
PufTMT	3	Atrium	157	12.3333	0.168352
PufTMT	3	Atrium	158	12.4444	0.185528
PufTMT	3	Atrium	159	12.5556	0.168475
PufTMT	3	Atrium	160	12.6667	0.152235
PufTMT	3	Atrium	161	12.7778	0.167495
PufTMT	3	Atrium	162	12.8889	0.17797
PufTMT	3	Atrium	163	13	0.163352
PufTMT	3	Atrium	164	13.1111	0.146414
PufTMT	3	Atrium	165	13.2222	0.155909
PufTMT	3	Atrium	166	13.3333	0.120663
PufTMT	3	Atrium	167	13.4444	0.0669634
PufTMT	3	Atrium	168	13.5556	0.0669701
PufTMT	3	Atrium	169	13.6667	0.0669656
PufTMT	3	Atrium	170	13.7778	0.0669634
PufTMT	3	Atrium	171	13.8889	0.0669712
PufTMT	3	Atrium	172	14	0.0669801
PufTMT	3	Atrium	173	14.1111	0.0670148
PufTMT	3	Atrium	174	14.2222	0.0676941
PufTMT	3	Atrium	175	14.3333	0.0749442
PufTMT	3	Atrium	176	14.4444	0.116188
PufTMT	3	Atrium	177	14.5556	0.125757
PufTMT	3	Atrium	178	14.6667	0.172912
PufTMT	3	Atrium	179	14.7778	0.182904
PufTMT	3	Atrium	180	14.8889	0.166306
PufTMT	3	Atrium	181	15	0.151434
PufTMT	3	Atrium	182	15.1111	0.170674
PufTMT	3	Atrium	183	15.2222	0.178744
PufTMT	3	Atrium	184	15.3333	0.163233
PufTMT	3	Atrium	185	15.4444	0.149123
PufTMT	3	Atrium	186	15.5556	0.163665
PufTMT	3	Atrium	187	15.6667	0.177585
PufTMT	3	Atrium	188	15.7778	0.162978
PufTMT	3	Atrium	189	15.8889	0.131296
PufTMT	3	Atrium	190	16	0.0669712
PufTMT	3	Atrium	191	16.1111	0.066941
PufTMT	3	Atrium	192	16.2222	0.0669544
PufTMT	3	Atrium	193	16.3333	0.0669522
PufTMT	3	Atrium	194	16.4444	0.0669455
PufTMT	3	Atrium	195	16.5556	0.0669466
PufTMT	3	Atrium	196	16.6667	0.0669533
PufTMT	3	Atrium	197	16.7778	0.0669343
PufTMT	3	Atrium	198	16.8889	0.0669387
PufTMT	3	Atrium	199	17	0.0669566
PufTMT	3	Atrium	200	17.1111	0.0669634
PufTMT	3	Atrium	201	17.2222	0.0669745
PufTMT	3	Atrium	202	17.3333	0.0669712
PufTMT	3	Atrium	203	17.4444	0.0670036
PufTMT	3	Atrium	204	17.5556	0.0670081
PufTMT	3	Atrium	205	17.6667	0.0670339
PufTMT	3	Atrium	206	17.7778	0.0670428
PufTMT	3	Atrium	207	17.8889	0.0671122
PufTMT	3	Atrium	208	18	0.0765791
PufTMT	3	Atrium	209	18.1111	0.137114
PufTMT	3	Atrium	210	18.2222	0.144471
PufTMT	3	Atrium	211	18.3333	0.174367
PufTMT	3	Atrium	212	18.4444	0.188562
PufTMT	3	Atrium	213	18.5556	0.17498
PufTMT	3	Atrium	214	18.6667	0.155195
PufTMT	3	Atrium	215	18.7778	0.160414
PufTMT	3	Atrium	216	18.8889	0.180096
PufTMT	3	Atrium	217	19	0.168214
PufTMT	3	Atrium	218	19.1111	0.150643
PufTMT	3	Atrium	219	19.2222	0.152561
PufTMT	3	Atrium	220	19.3333	0.174411
PufTMT	3	Atrium	221	19.4444	0.10568
PufTMT	3	Atrium	222	19.5556	0.0669421
PufTMT	3	Atrium	223	19.6667	0.0669354
PufTMT	3	Atrium	224	19.7778	0.0669443
PufTMT	3	Atrium	225	19.8889	0.0669622
PufTMT	3	Atrium	226	20	0.0669522
PufTMT	3	Atrium	227	20.1111	0.0669589
PufTMT	3	Atrium	228	20.2222	0.066951
PufTMT	3	Atrium	229	20.3333	0.0669611
PufTMT	3	Atrium	230	20.4444	0.0669622
PufTMT	3	Atrium	231	20.5556	0.0671189
PufTMT	3	Atrium	232	20.6667	0.0683308
PufTMT	3	Atrium	233	20.7778	0.0696412
PufTMT	3	Atrium	234	20.8889	0.0684338
PufTMT	3	Atrium	235	21	0.0677478
PufTMT	3	Atrium	236	21.1111	0.0689798
PufTMT	3	Atrium	237	21.2222	0.0728069
PufTMT	3	Atrium	238	21.3333	0.0991475
PufTMT	3	Atrium	239	21.4444	0.139269
PufTMT	3	Atrium	240	21.5556	0.148336
PufTMT	3	Atrium	241	21.6667	0.18999
PufTMT	3	Atrium	242	21.7778	0.17996
PufTMT	3	Atrium	243	21.8889	0.16127
PufTMT	3	Atrium	244	22	0.151964
PufTMT	3	Atrium	245	22.1111	0.1797
PufTMT	3	Atrium	246	22.2222	0.17572
PufTMT	3	Atrium	247	22.3333	0.157821
PufTMT	3	Atrium	248	22.4444	0.148543
PufTMT	3	Atrium	249	22.5556	0.176125
PufTMT	3	Atrium	250	22.6667	0.173764
PufTMT	3	Atrium	251	22.7778	0.155763
PufTMT	3	Atrium	252	22.8889	0.139865
PufTMT	3	Atrium	253	23	0.0671211
PufTMT	3	Atrium	254	23.1111	0.0669947
PufTMT	3	Atrium	255	23.2222	0.0669913
PufTMT	3	Atrium	256	23.3333	0.0669925
PufTMT	3	Atrium	257	23.4444	0.066979
PufTMT	3	Atrium	258	23.5556	0.0670182
PufTMT	3	Atrium	259	23.6667	0.0670025
PufTMT	3	Atrium	260	23.7778	0.0670048
PufTMT	3	Atrium	261	23.8889	0.0669801
PufTMT	3	Atrium	262	24	0.067007
PufTMT	3	Atrium	263	24.1111	0.0669947
PufTMT	3	Atrium	264	24.2222	0.0670104
PufTMT	3	Atrium	265	24.3333	0.0670249
PufTMT	3	Atrium	266	24.4444	0.0670417
PufTMT	4	Atrium	1	-5	0.0617823
PufTMT	4	Atrium	2	-4.88889	0.0617543
PufTMT	4	Atrium	3	-4.77778	0.0619703
PufTMT	4	Atrium	4	-4.66667	0.0619602
PufTMT	4	Atrium	5	-4.55556	0.0616346
PufTMT	4	Atrium	6	-4.44444	0.061573
PufTMT	4	Atrium	7	-4.33333	0.0620016
PufTMT	4	Atrium	8	-4.22222	0.0615607
PufTMT	4	Atrium	9	-4.11111	0.0618024
PufTMT	4	Atrium	10	-4	0.0619065
PufTMT	4	Atrium	11	-3.88889	0.0617677
PufTMT	4	Atrium	12	-3.77778	0.0617722
PufTMT	4	Atrium	13	-3.66667	0.0616066
PufTMT	4	Atrium	14	-3.55556	0.0614399
PufTMT	4	Atrium	15	-3.44444	0.0615809
PufTMT	4	Atrium	16	-3.33333	0.0617073
PufTMT	4	Atrium	17	-3.22222	0.0617498
PufTMT	4	Atrium	18	-3.11111	0.0616648
PufTMT	4	Atrium	19	-3	0.0615484
PufTMT	4	Atrium	20	-2.88889	0.0615495
PufTMT	4	Atrium	21	-2.77778	0.0618326
PufTMT	4	Atrium	22	-2.66667	0.0616816
PufTMT	4	Atrium	23	-2.55556	0.0619625
PufTMT	4	Atrium	24	-2.44444	0.0618203
PufTMT	4	Atrium	25	-2.33333	0.0616044
PufTMT	4	Atrium	26	-2.22222	0.061949
PufTMT	4	Atrium	27	-2.11111	0.0618517
PufTMT	4	Atrium	28	-2	0.0617644
PufTMT	4	Atrium	29	-1.88889	0.0616312
PufTMT	4	Atrium	30	-1.77778	0.0616368
PufTMT	4	Atrium	31	-1.66667	0.0616413
PufTMT	4	Atrium	32	-1.55556	0.0615585
PufTMT	4	Atrium	33	-1.44444	0.0618517
PufTMT	4	Atrium	34	-1.33333	0.061798
PufTMT	4	Atrium	35	-1.22222	0.0616939
PufTMT	4	Atrium	36	-1.11111	0.0616458
PufTMT	4	Atrium	37	-1	0.0615395
PufTMT	4	Atrium	38	-0.888889	0.0618841
PufTMT	4	Atrium	39	-0.777778	0.0617767
PufTMT	4	Atrium	40	-0.666667	0.0619031
PufTMT	4	Atrium	41	-0.555556	0.0617275
PufTMT	4	Atrium	42	-0.444444	0.061817
PufTMT	4	Atrium	43	-0.333333	0.0617465
PufTMT	4	Atrium	44	-0.222222	0.0616088
PufTMT	4	Atrium	45	-0.111111	0.0617409
PufTMT	4	Atrium	46	0	0.378968
PufTMT	4	Atrium	47	0.111111	0.746348
PufTMT	4	Atrium	48	0.222222	0.641059
PufTMT	4	Atrium	49	0.333333	0.530478
PufTMT	4	Atrium	50	0.444444	0.466281
PufTMT	4	Atrium	51	0.555556	0.404975
PufTMT	4	Atrium	52	0.666667	0.357531
PufTMT	4	Atrium	53	0.777778	0.381671
PufTMT	4	Atrium	54	0.888889	0.355868
PufTMT	4	Atrium	55	1	0.321179
PufTMT	4	Atrium	56	1.11111	0.29271
PufTMT	4	Atrium	57	1.22222	0.326509
PufTMT	4	Atrium	58	1.33333	0.337545
PufTMT	4	Atrium	59	1.44444	0.29648
PufTMT	4	Atrium	60	1.55556	0.389556
PufTMT	4	Atrium	61	1.66667	0.318431
PufTMT	4	Atrium	62	1.77778	0.292759
PufTMT	4	Atrium	63	1.88889	0.267593
PufTMT	4	Atrium	64	2	0.247916
PufTMT	4	Atrium	65	2.11111	0.336862
PufTMT	4	Atrium	66	2.22222	0.282689
PufTMT	4	Atrium	67	2.33333	0.301229
PufTMT	4	Atrium	68	2.44444	0.336398
PufTMT	4	Atrium	69	2.55556	0.287652
PufTMT	4	Atrium	70	2.66667	0.371352
PufTMT	4	Atrium	71	2.77778	0.310779
PufTMT	4	Atrium	72	2.88889	0.309055
PufTMT	4	Atrium	73	3	0.356045
PufTMT	4	Atrium	74	3.11111	0.29702
PufTMT	4	Atrium	75	3.22222	0.365683
PufTMT	4	Atrium	76	3.33333	0.319427
PufTMT	4	Atrium	77	3.44444	0.296208
PufTMT	4	Atrium	78	3.55556	0.364137
PufTMT	4	Atrium	79	3.66667	0.297716
PufTMT	4	Atrium	80	3.77778	0.311047
PufTMT	4	Atrium	81	3.88889	0.339886
PufTMT	4	Atrium	82	4	0.288809
PufTMT	4	Atrium	83	4.11111	0.265988
PufTMT	4	Atrium	84	4.22222	0.271862
PufTMT	4	Atrium	85	4.33333	0.316316
PufTMT	4	Atrium	86	4.44444	0.271124
PufTMT	4	Atrium	87	4.55556	0.355886
PufTMT	4	Atrium	88	4.66667	0.294533
PufTMT	4	Atrium	89	4.77778	0.320295
PufTMT	4	Atrium	90	4.88889	0.32822
PufTMT	4	Atrium	91	5	0.284972
PufTMT	4	Atrium	92	5.11111	0.364658
PufTMT	4	Atrium	93	5.22222	0.299315
PufTMT	4	Atrium	94	5.33333	0.275853
PufTMT	4	Atrium	95	5.44444	0.344052
PufTMT	4	Atrium	96	5.55556	0.287451
PufTMT	4	Atrium	97	5.66667	0.265552
PufTMT	4	Atrium	98	5.77778	0.340383
PufTMT	4	Atrium	99	5.88889	0.280046
PufTMT	4	Atrium	100	6	0.275718
PufTMT	4	Atrium	101	6.11111	0.326713
PufTMT	4	Atrium	102	6.22222	0.273991
PufTMT	4	Atrium	103	6.33333	0.332936
PufTMT	4	Atrium	104	6.44444	0.299195
PufTMT	4	Atrium	105	6.55556	0.280337
PufTMT	4	Atrium	106	6.66667	0.336631
PufTMT	4	Atrium	107	6.77778	0.279878
PufTMT	4	Atrium	108	6.88889	0.346607
PufTMT	4	Atrium	109	7	0.297852
PufTMT	4	Atrium	110	7.11111	0.287434
PufTMT	4	Atrium	111	7.22222	0.333531
PufTMT	4	Atrium	112	7.33333	0.279695
PufTMT	4	Atrium	113	7.44444	0.355088
PufTMT	4	Atrium	114	7.55556	0.292058
PufTMT	4	Atrium	115	7.66667	0.320165
PufTMT	4	Atrium	116	7.77778	0.317371
PufTMT	4	Atrium	117	7.88889	0.283469
PufTMT	4	Atrium	118	8	0.345321
PufTMT	4	Atrium	119	8.11111	0.284033
PufTMT	4	Atrium	120	8.22222	0.357136
PufTMT	4	Atrium	121	8.33333	0.295758
PufTMT	4	Atrium	122	8.44444	0.321837
PufTMT	4	Atrium	123	8.55556	0.31903
PufTMT	4	Atrium	124	8.66667	0.28467
PufTMT	4	Atrium	125	8.77778	0.346193
PufTMT	4	Atrium	126	8.88889	0.28488
PufTMT	4	Atrium	127	9	0.355062
PufTMT	4	Atrium	128	9.11111	0.295094
PufTMT	4	Atrium	129	9.22222	0.272851
PufTMT	4	Atrium	130	9.33333	0.322064
PufTMT	4	Atrium	131	9.44444	0.29395
PufTMT	4	Atrium	132	9.55556	0.286222
PufTMT	4	Atrium	133	9.66667	0.326195
PufTMT	4	Atrium	134	9.77778	0.276056
PufTMT	4	Atrium	135	9.88889	0.349858
PufTMT	4	Atrium	136	10	0.28791
PufTMT	4	Atrium	137	10.1111	0.333194
PufTMT	4	Atrium	138	10.2222	0.307742
PufTMT	4	Atrium	139	10.3333	0.298693
PufTMT	4	Atrium	140	10.4444	0.331214
PufTMT	4	Atrium	141	10.5556	0.283139
PufTMT	4	Atrium	142	10.6667	0.360017
PufTMT	4	Atrium	143	10.7778	0.288136
PufTMT	4	Atrium	144	10.8889	0.35292
PufTMT	4	Atrium	145	11	0.300665
PufTMT	4	Atrium	146	11.1111	0.320308
PufTMT	4	Atrium	147	11.2222	0.321651
PufTMT	4	Atrium	148	11.3333	0.285716
PufTMT	4	Atrium	149	11.4444	0.347308
PufTMT	4	Atrium	150	11.5556	0.284962
PufTMT	4	Atrium	151	11.6667	0.358083
PufTMT	4	Atrium	152	11.7778	0.294023
PufTMT	4	Atrium	153	11.8889	0.345095
PufTMT	4	Atrium	154	12	0.30546
PufTMT	4	Atrium	155	12.1111	0.290963
PufTMT	4	Atrium	156	12.2222	0.337325
PufTMT	4	Atrium	157	12.3333	0.28213
PufTMT	4	Atrium	158	12.4444	0.354368
PufTMT	4	Atrium	159	12.5556	0.28978
PufTMT	4	Atrium	160	12.6667	0.347038
PufTMT	4	Atrium	161	12.7778	0.302115
PufTMT	4	Atrium	162	12.8889	0.312815
PufTMT	4	Atrium	163	13	0.323851
PufTMT	4	Atrium	164	13.1111	0.280905
PufTMT	4	Atrium	165	13.2222	0.352135
PufTMT	4	Atrium	166	13.3333	0.286898
PufTMT	4	Atrium	167	13.4444	0.350426
PufTMT	4	Atrium	168	13.5556	0.298085
PufTMT	4	Atrium	169	13.6667	0.326297
PufTMT	4	Atrium	170	13.7778	0.315215
PufTMT	4	Atrium	171	13.8889	0.299116
PufTMT	4	Atrium	172	14	0.332994
PufTMT	4	Atrium	173	14.1111	0.286392
PufTMT	4	Atrium	174	14.2222	0.348976
PufTMT	4	Atrium	175	14.3333	0.287478
PufTMT	4	Atrium	176	14.4444	0.358513
PufTMT	4	Atrium	177	14.5556	0.293302
PufTMT	4	Atrium	178	14.6667	0.34222
PufTMT	4	Atrium	179	14.7778	0.306205
PufTMT	4	Atrium	180	14.8889	0.315336
PufTMT	4	Atrium	181	15	0.322317
PufTMT	4	Atrium	182	15.1111	0.293592
PufTMT	4	Atrium	183	15.2222	0.338728
PufTMT	4	Atrium	184	15.3333	0.285368
PufTMT	4	Atrium	185	15.4444	0.352455
PufTMT	4	Atrium	186	15.5556	0.286972
PufTMT	4	Atrium	187	15.6667	0.330636
PufTMT	4	Atrium	188	15.7778	0.308932
PufTMT	4	Atrium	189	15.8889	0.310791
PufTMT	4	Atrium	190	16	0.324667
PufTMT	4	Atrium	191	16.1111	0.293232
PufTMT	4	Atrium	192	16.2222	0.337801
PufTMT	4	Atrium	193	16.3333	0.285645
PufTMT	4	Atrium	194	16.4444	0.366156
PufTMT	4	Atrium	195	16.5556	0.363918
PufTMT	4	Atrium	196	16.6667	0.379927
PufTMT	4	Atrium	197	16.7778	0.31868
PufTMT	4	Atrium	198	16.8889	0.278772
PufTMT	4	Atrium	199	17	0.251981
PufTMT	4	Atrium	200	17.1111	0.232546
PufTMT	4	Atrium	201	17.2222	0.21722
PufTMT	4	Atrium	202	17.3333	0.213909
PufTMT	4	Atrium	203	17.4444	0.27636
PufTMT	4	Atrium	204	17.5556	0.239491
PufTMT	4	Atrium	205	17.6667	0.318146
PufTMT	4	Atrium	206	17.7778	0.271259
PufTMT	4	Atrium	207	17.8889	0.305599
PufTMT	4	Atrium	208	18	0.301561
PufTMT	4	Atrium	209	18.1111	0.285693
PufTMT	4	Atrium	210	18.2222	0.326144
PufTMT	4	Atrium	211	18.3333	0.276888
PufTMT	4	Atrium	212	18.4444	0.349691
PufTMT	4	Atrium	213	18.5556	0.284678
PufTMT	4	Atrium	214	18.6667	0.341407
PufTMT	4	Atrium	215	18.7778	0.297935
PufTMT	4	Atrium	216	18.8889	0.305675
PufTMT	4	Atrium	217	19	0.321901
PufTMT	4	Atrium	218	19.1111	0.282694
PufTMT	4	Atrium	219	19.2222	0.34455
PufTMT	4	Atrium	220	19.3333	0.282522
PufTMT	4	Atrium	221	19.4444	0.349052
PufTMT	4	Atrium	222	19.5556	0.291909
PufTMT	4	Atrium	223	19.6667	0.296251
PufTMT	4	Atrium	224	19.7778	0.324053
PufTMT	4	Atrium	225	19.8889	0.27839
PufTMT	4	Atrium	226	20	0.346714
PufTMT	4	Atrium	227	20.1111	0.282572
PufTMT	4	Atrium	228	20.2222	0.334136
PufTMT	4	Atrium	229	20.3333	0.298113
PufTMT	4	Atrium	230	20.4444	0.302806
PufTMT	4	Atrium	231	20.5556	0.319511
PufTMT	4	Atrium	232	20.6667	0.278915
PufTMT	4	Atrium	233	20.7778	0.345121
PufTMT	4	Atrium	234	20.8889	0.281943
PufTMT	4	Atrium	235	21	0.321517
PufTMT	4	Atrium	236	21.1111	0.302907
PufTMT	4	Atrium	237	21.2222	0.27239
PufTMT	4	Atrium	238	21.3333	0.252337
PufTMT	4	Atrium	239	21.4444	0.322933
PufTMT	4	Atrium	240	21.5556	0.26702
PufTMT	4	Atrium	241	21.6667	0.326363
PufTMT	4	Atrium	242	21.7778	0.287159
PufTMT	4	Atrium	243	21.8889	0.294286
PufTMT	4	Atrium	244	22	0.314532
PufTMT	4	Atrium	245	22.1111	0.274101
PufTMT	4	Atrium	246	22.2222	0.338632
PufTMT	4	Atrium	247	22.3333	0.27819
PufTMT	4	Atrium	248	22.4444	0.344092
PufTMT	4	Atrium	249	22.5556	0.288214
PufTMT	4	Atrium	250	22.6667	0.319686
PufTMT	4	Atrium	251	22.7778	0.306291
PufTMT	4	Atrium	252	22.8889	0.289745
PufTMT	4	Atrium	253	23	0.327134
PufTMT	4	Atrium	254	23.1111	0.27884
PufTMT	4	Atrium	255	23.2222	0.344806
PufTMT	4	Atrium	256	23.3333	0.281728
PufTMT	4	Atrium	257	23.4444	0.33966
PufTMT	4	Atrium	258	23.5556	0.293325
PufTMT	4	Atrium	259	23.6667	0.317773
PufTMT	4	Atrium	260	23.7778	0.308577
PufTMT	4	Atrium	261	23.8889	0.288015
PufTMT	4	Atrium	262	24	0.329579
PufTMT	4	Atrium	263	24.1111	0.279646
PufTMT	4	Atrium	264	24.2222	0.344129
PufTMT	4	Atrium	265	24.3333	0.282193
PufTMT	4	Atrium	266	24.4444	0.34685
PufTMT	1	Ventricle	1	-5	0
PufTMT	1	Ventricle	2	-4.88889	0
PufTMT	1	Ventricle	3	-4.77778	0
PufTMT	1	Ventricle	4	-4.66667	0
PufTMT	1	Ventricle	5	-4.55556	0
PufTMT	1	Ventricle	6	-4.44444	0
PufTMT	1	Ventricle	7	-4.33333	0
PufTMT	1	Ventricle	8	-4.22222	0
PufTMT	1	Ventricle	9	-4.11111	0
PufTMT	1	Ventricle	10	-4	0
PufTMT	1	Ventricle	11	-3.88889	0
PufTMT	1	Ventricle	12	-3.77778	0
PufTMT	1	Ventricle	13	-3.66667	0
PufTMT	1	Ventricle	14	-3.55556	0
PufTMT	1	Ventricle	15	-3.44444	0
PufTMT	1	Ventricle	16	-3.33333	0
PufTMT	1	Ventricle	17	-3.22222	0
PufTMT	1	Ventricle	18	-3.11111	0
PufTMT	1	Ventricle	19	-3	0
PufTMT	1	Ventricle	20	-2.88889	0
PufTMT	1	Ventricle	21	-2.77778	0.040576
PufTMT	1	Ventricle	22	-2.66667	0.0419475
PufTMT	1	Ventricle	23	-2.55556	0.0408168
PufTMT	1	Ventricle	24	-2.44444	0.0409554
PufTMT	1	Ventricle	25	-2.33333	0.0418746
PufTMT	1	Ventricle	26	-2.22222	0.0419475
PufTMT	1	Ventricle	27	-2.11111	0.0416557
PufTMT	1	Ventricle	28	-2	0.0414369
PufTMT	1	Ventricle	29	-1.88889	0.0404885
PufTMT	1	Ventricle	30	-1.77778	0.0420862
PufTMT	1	Ventricle	31	-1.66667	0.0414588
PufTMT	1	Ventricle	32	-1.55556	0.0429981
PufTMT	1	Ventricle	33	-1.44444	0.0425093
PufTMT	1	Ventricle	34	-1.33333	0.0421591
PufTMT	1	Ventricle	35	-1.22222	0.0418819
PufTMT	1	Ventricle	36	-1.11111	0.0412691
PufTMT	1	Ventricle	37	-1	0.0428959
PufTMT	1	Ventricle	38	-0.888889	0.0411013
PufTMT	1	Ventricle	39	-0.777778	0.0403864
PufTMT	1	Ventricle	40	-0.666667	0.0413785
PufTMT	1	Ventricle	41	-0.555556	0
PufTMT	1	Ventricle	42	-0.444444	0.0419184
PufTMT	1	Ventricle	43	-0.333333	0.0423561
PufTMT	1	Ventricle	44	-0.222222	0.0421737
PufTMT	1	Ventricle	45	-0.111111	0.0415244
PufTMT	1	Ventricle	46	0	0.0418673
PufTMT	1	Ventricle	47	0.111111	0.941018
PufTMT	1	Ventricle	48	0.222222	1.86028
PufTMT	1	Ventricle	49	0.333333	1.86028
PufTMT	1	Ventricle	50	0.444444	1.86028
PufTMT	1	Ventricle	51	0.555556	1.8575
PufTMT	1	Ventricle	52	0.666667	1.83782
PufTMT	1	Ventricle	53	0.777778	1.77686
PufTMT	1	Ventricle	54	0.888889	1.69383
PufTMT	1	Ventricle	55	1	1.59776
PufTMT	1	Ventricle	56	1.11111	1.52638
PufTMT	1	Ventricle	57	1.22222	1.41166
PufTMT	1	Ventricle	58	1.33333	1.37317
PufTMT	1	Ventricle	59	1.44444	1.31112
PufTMT	1	Ventricle	60	1.55556	1.22614
PufTMT	1	Ventricle	61	1.66667	1.07797
PufTMT	1	Ventricle	62	1.77778	1.03214
PufTMT	1	Ventricle	63	1.88889	0.958461
PufTMT	1	Ventricle	64	2	0.915806
PufTMT	1	Ventricle	65	2.11111	0.875485
PufTMT	1	Ventricle	66	2.22222	0.897349
PufTMT	1	Ventricle	67	2.33333	0.863003
PufTMT	1	Ventricle	68	2.44444	0.814067
PufTMT	1	Ventricle	69	2.55556	0.761476
PufTMT	1	Ventricle	70	2.66667	0.716369
PufTMT	1	Ventricle	71	2.77778	0.725671
PufTMT	1	Ventricle	72	2.88889	0.700181
PufTMT	1	Ventricle	73	3	0.645627
PufTMT	1	Ventricle	74	3.11111	0.581736
PufTMT	1	Ventricle	75	3.22222	0.524724
PufTMT	1	Ventricle	76	3.33333	0.476655
PufTMT	1	Ventricle	77	3.44444	0.441296
PufTMT	1	Ventricle	78	3.55556	0.41078
PufTMT	1	Ventricle	79	3.66667	0.380103
PufTMT	1	Ventricle	80	3.77778	0.357451
PufTMT	1	Ventricle	81	3.88889	0.339264
PufTMT	1	Ventricle	82	4	0.319524
PufTMT	1	Ventricle	83	4.11111	0.303584
PufTMT	1	Ventricle	84	4.22222	0.290861
PufTMT	1	Ventricle	85	4.33333	0.276358
PufTMT	1	Ventricle	86	4.44444	0.265459
PufTMT	1	Ventricle	87	4.55556	0.255938
PufTMT	1	Ventricle	88	4.66667	0.249088
PufTMT	1	Ventricle	89	4.77778	0.24342
PufTMT	1	Ventricle	90	4.88889	0.235052
PufTMT	1	Ventricle	91	5	0.229406
PufTMT	1	Ventricle	92	5.11111	0.226517
PufTMT	1	Ventricle	93	5.22222	0.223737
PufTMT	1	Ventricle	94	5.33333	0.218631
PufTMT	1	Ventricle	95	5.44444	0.215691
PufTMT	1	Ventricle	96	5.55556	0.210949
PufTMT	1	Ventricle	97	5.66667	0.210197
PufTMT	1	Ventricle	98	5.77778	0.210693
PufTMT	1	Ventricle	99	5.88889	0.207148
PufTMT	1	Ventricle	100	6	0.206477
PufTMT	1	Ventricle	101	6.11111	0.206382
PufTMT	1	Ventricle	102	6.22222	0.204055
PufTMT	1	Ventricle	103	6.33333	0.201363
PufTMT	1	Ventricle	104	6.44444	0.199977
PufTMT	1	Ventricle	105	6.55556	0.197234
PufTMT	1	Ventricle	106	6.66667	0.193345
PufTMT	1	Ventricle	107	6.77778	0.191689
PufTMT	1	Ventricle	108	6.88889	0.189187
PufTMT	1	Ventricle	109	7	0.187159
PufTMT	1	Ventricle	110	7.11111	0.186619
PufTMT	1	Ventricle	111	7.22222	0.18551
PufTMT	1	Ventricle	112	7.33333	0.185073
PufTMT	1	Ventricle	113	7.44444	0.183365
PufTMT	1	Ventricle	114	7.55556	0.182753
PufTMT	1	Ventricle	115	7.66667	0.180922
PufTMT	1	Ventricle	116	7.77778	0.180338
PufTMT	1	Ventricle	117	7.88889	0.179477
PufTMT	1	Ventricle	118	8	0.178675
PufTMT	1	Ventricle	119	8.11111	0.176676
PufTMT	1	Ventricle	120	8.22222	0.177135
PufTMT	1	Ventricle	121	8.33333	0.175924
PufTMT	1	Ventricle	122	8.44444	0.176092
PufTMT	1	Ventricle	123	8.55556	0.174896
PufTMT	1	Ventricle	124	8.66667	0.173787
PufTMT	1	Ventricle	125	8.77778	0.172029
PufTMT	1	Ventricle	126	8.88889	0.171671
PufTMT	1	Ventricle	127	9	0.171876
PufTMT	1	Ventricle	128	9.11111	0.171846
PufTMT	1	Ventricle	129	9.22222	0.170956
PufTMT	1	Ventricle	130	9.33333	0.170161
PufTMT	1	Ventricle	131	9.44444	0.169483
PufTMT	1	Ventricle	132	9.55556	0.169315
PufTMT	1	Ventricle	133	9.66667	0.168607
PufTMT	1	Ventricle	134	9.77778	0.169118
PufTMT	1	Ventricle	135	9.88889	0.16771
PufTMT	1	Ventricle	136	10	0.177741
PufTMT	1	Ventricle	137	10.1111	0.269931
PufTMT	1	Ventricle	138	10.2222	0.2825
PufTMT	1	Ventricle	139	10.3333	0.27174
PufTMT	1	Ventricle	140	10.4444	0.261614
PufTMT	1	Ventricle	141	10.5556	0.364535
PufTMT	1	Ventricle	142	10.6667	0.362631
PufTMT	1	Ventricle	143	10.7778	0.342759
PufTMT	1	Ventricle	144	10.8889	0.322558
PufTMT	1	Ventricle	145	11	0.340585
PufTMT	1	Ventricle	146	11.1111	0.454792
PufTMT	1	Ventricle	147	11.2222	0.409831
PufTMT	1	Ventricle	148	11.3333	0.37709
PufTMT	1	Ventricle	149	11.4444	0.474868
PufTMT	1	Ventricle	150	11.5556	0.504582
PufTMT	1	Ventricle	151	11.6667	0.456586
PufTMT	1	Ventricle	152	11.7778	0.420015
PufTMT	1	Ventricle	153	11.8889	0.388872
PufTMT	1	Ventricle	154	12	0.363842
PufTMT	1	Ventricle	155	12.1111	0.336521
PufTMT	1	Ventricle	156	12.2222	0.314512
PufTMT	1	Ventricle	157	12.3333	0.297594
PufTMT	1	Ventricle	158	12.4444	0.283981
PufTMT	1	Ventricle	159	12.5556	0.2719
PufTMT	1	Ventricle	160	12.6667	0.262015
PufTMT	1	Ventricle	161	12.7778	0.252174
PufTMT	1	Ventricle	162	12.8889	0.24342
PufTMT	1	Ventricle	163	13	0.237219
PufTMT	1	Ventricle	164	13.1111	0.2305
PufTMT	1	Ventricle	165	13.2222	0.226495
PufTMT	1	Ventricle	166	13.3333	0.223307
PufTMT	1	Ventricle	167	13.4444	0.219046
PufTMT	1	Ventricle	168	13.5556	0.214458
PufTMT	1	Ventricle	169	13.6667	0.211955
PufTMT	1	Ventricle	170	13.7778	0.209789
PufTMT	1	Ventricle	171	13.8889	0.205477
PufTMT	1	Ventricle	172	14	0.20299
PufTMT	1	Ventricle	173	14.1111	0.201078
PufTMT	1	Ventricle	174	14.2222	0.199962
PufTMT	1	Ventricle	175	14.3333	0.198182
PufTMT	1	Ventricle	176	14.4444	0.194673
PufTMT	1	Ventricle	177	14.5556	0.191354
PufTMT	1	Ventricle	178	14.6667	0.188399
PufTMT	1	Ventricle	179	14.7778	0.187626
PufTMT	1	Ventricle	180	14.8889	0.186612
PufTMT	1	Ventricle	181	15	0.184657
PufTMT	1	Ventricle	182	15.1111	0.18249
PufTMT	1	Ventricle	183	15.2222	0.180783
PufTMT	1	Ventricle	184	15.3333	0.18001
PufTMT	1	Ventricle	185	15.4444	0.179543
PufTMT	1	Ventricle	186	15.5556	0.176362
PufTMT	1	Ventricle	187	15.6667	0.176814
PufTMT	1	Ventricle	188	15.7778	0.17742
PufTMT	1	Ventricle	189	15.8889	0.176749
PufTMT	1	Ventricle	190	16	0.176406
PufTMT	1	Ventricle	191	16.1111	0.177748
PufTMT	1	Ventricle	192	16.2222	0.1782
PufTMT	1	Ventricle	193	16.3333	0.177858
PufTMT	1	Ventricle	194	16.4444	0.178682
PufTMT	1	Ventricle	195	16.5556	0.178507
PufTMT	1	Ventricle	196	16.6667	0.177646
PufTMT	1	Ventricle	197	16.7778	0.177084
PufTMT	1	Ventricle	198	16.8889	0.193841
PufTMT	1	Ventricle	199	17	0.28064
PufTMT	1	Ventricle	200	17.1111	0.269967
PufTMT	1	Ventricle	201	17.2222	0.273447
PufTMT	1	Ventricle	202	17.3333	0.380665
PufTMT	1	Ventricle	203	17.4444	0.352352
PufTMT	1	Ventricle	204	17.5556	0.350207
PufTMT	1	Ventricle	205	17.6667	0.469178
PufTMT	1	Ventricle	206	17.7778	0.42138
PufTMT	1	Ventricle	207	17.8889	0.411998
PufTMT	1	Ventricle	208	18	0.538213
PufTMT	1	Ventricle	209	18.1111	0.487146
PufTMT	1	Ventricle	210	18.2222	0.449313
PufTMT	1	Ventricle	211	18.3333	0.437699
PufTMT	1	Ventricle	212	18.4444	0.557209
PufTMT	1	Ventricle	213	18.5556	0.499665
PufTMT	1	Ventricle	214	18.6667	0.518683
PufTMT	1	Ventricle	215	18.7778	0.613558
PufTMT	1	Ventricle	216	18.8889	0.546442
PufTMT	1	Ventricle	217	19	0.547266
PufTMT	1	Ventricle	218	19.1111	0.647451
PufTMT	1	Ventricle	219	19.2222	0.581889
PufTMT	1	Ventricle	220	19.3333	0.53339
PufTMT	1	Ventricle	221	19.4444	0.491691
PufTMT	1	Ventricle	222	19.5556	0.629527
PufTMT	1	Ventricle	223	19.6667	0.582137
PufTMT	1	Ventricle	224	19.7778	0.531311
PufTMT	1	Ventricle	225	19.8889	0.583122
PufTMT	1	Ventricle	226	20	0.637741
PufTMT	1	Ventricle	227	20.1111	0.574623
PufTMT	1	Ventricle	228	20.2222	0.515211
PufTMT	1	Ventricle	229	20.3333	0.605526
PufTMT	1	Ventricle	230	20.4444	0.598114
PufTMT	1	Ventricle	231	20.5556	0.539898
PufTMT	1	Ventricle	232	20.6667	0.606817
PufTMT	1	Ventricle	233	20.7778	0.620736
PufTMT	1	Ventricle	234	20.8889	0.57072
PufTMT	1	Ventricle	235	21	0.628951
PufTMT	1	Ventricle	236	21.1111	0.644365
PufTMT	1	Ventricle	237	21.2222	0.588411
PufTMT	1	Ventricle	238	21.3333	0.628673
PufTMT	1	Ventricle	239	21.4444	0.659583
PufTMT	1	Ventricle	240	21.5556	0.605496
PufTMT	1	Ventricle	241	21.6667	0.550221
PufTMT	1	Ventricle	242	21.7778	0.66469
PufTMT	1	Ventricle	243	21.8889	0.605212
PufTMT	1	Ventricle	244	22	0.57706
PufTMT	1	Ventricle	245	22.1111	0.686437
PufTMT	1	Ventricle	246	22.2222	0.630804
PufTMT	1	Ventricle	247	22.3333	0.642162
PufTMT	1	Ventricle	248	22.4444	0.692499
PufTMT	1	Ventricle	249	22.5556	0.62604
PufTMT	1	Ventricle	250	22.6667	0.595407
PufTMT	1	Ventricle	251	22.7778	0.670884
PufTMT	1	Ventricle	252	22.8889	0.612682
PufTMT	1	Ventricle	253	23	0.591869
PufTMT	1	Ventricle	254	23.1111	0.665346
PufTMT	1	Ventricle	255	23.2222	0.606124
PufTMT	1	Ventricle	256	23.3333	0.568174
PufTMT	1	Ventricle	257	23.4444	0.625113
PufTMT	1	Ventricle	258	23.5556	0.596706
PufTMT	1	Ventricle	259	23.6667	0.569538
PufTMT	1	Ventricle	260	23.7778	0.570064
PufTMT	1	Ventricle	261	23.8889	0.605343
PufTMT	1	Ventricle	262	24	0.57668
PufTMT	1	Ventricle	263	24.1111	0.544333
PufTMT	1	Ventricle	264	24.2222	0.587528
PufTMT	1	Ventricle	265	24.3333	0.570501
PufTMT	1	Ventricle	266	24.4444	0.548054
PufTMT	2	Ventricle	1	-5	0.042982
PufTMT	2	Ventricle	2	-4.88889	0.0429857
PufTMT	2	Ventricle	3	-4.77778	0.042974
PufTMT	2	Ventricle	4	-4.66667	0.0429514
PufTMT	2	Ventricle	5	-4.55556	0.0429754
PufTMT	2	Ventricle	6	-4.44444	0.0429346
PufTMT	2	Ventricle	7	-4.33333	0.0429718
PufTMT	2	Ventricle	8	-4.22222	0.0429229
PufTMT	2	Ventricle	9	-4.11111	0.0430046
PufTMT	2	Ventricle	10	-4	0.0430024
PufTMT	2	Ventricle	11	-3.88889	0.0431111
PufTMT	2	Ventricle	12	-3.77778	0.0429258
PufTMT	2	Ventricle	13	-3.66667	0.0429047
PufTMT	2	Ventricle	14	-3.55556	0.0430469
PufTMT	2	Ventricle	15	-3.44444	0.0429623
PufTMT	2	Ventricle	16	-3.33333	0.0429331
PufTMT	2	Ventricle	17	-3.22222	0.0430024
PufTMT	2	Ventricle	18	-3.11111	0.0431068
PufTMT	2	Ventricle	19	-3	0.0428799
PufTMT	2	Ventricle	20	-2.88889	0.0429711
PufTMT	2	Ventricle	21	-2.77778	0.0431666
PufTMT	2	Ventricle	22	-2.66667	0.043152
PufTMT	2	Ventricle	23	-2.55556	0.0428704
PufTMT	2	Ventricle	24	-2.44444	0.0429477
PufTMT	2	Ventricle	25	-2.33333	0.0429018
PufTMT	2	Ventricle	26	-2.22222	0.0430717
PufTMT	2	Ventricle	27	-2.11111	0.0428981
PufTMT	2	Ventricle	28	-2	0.0429645
PufTMT	2	Ventricle	29	-1.88889	0.0430761
PufTMT	2	Ventricle	30	-1.77778	0.0430608
PufTMT	2	Ventricle	31	-1.66667	0.0429951
PufTMT	2	Ventricle	32	-1.55556	0.0429083
PufTMT	2	Ventricle	33	-1.44444	0.0429572
PufTMT	2	Ventricle	34	-1.33333	0.0429769
PufTMT	2	Ventricle	35	-1.22222	0.0431192
PufTMT	2	Ventricle	36	-1.11111	0.0429981
PufTMT	2	Ventricle	37	-1	0.0429288
PufTMT	2	Ventricle	38	-0.888889	0.0429193
PufTMT	2	Ventricle	39	-0.777778	0.0429842
PufTMT	2	Ventricle	40	-0.666667	0.0429849
PufTMT	2	Ventricle	41	-0.555556	0.0429915
PufTMT	2	Ventricle	42	-0.444444	0.0429995
PufTMT	2	Ventricle	43	-0.333333	0.0430323
PufTMT	2	Ventricle	44	-0.222222	0.0429514
PufTMT	2	Ventricle	45	-0.111111	0.0430316
PufTMT	2	Ventricle	46	0	0.443536
PufTMT	2	Ventricle	47	0.111111	0.725387
PufTMT	2	Ventricle	48	0.222222	0.614152
PufTMT	2	Ventricle	49	0.333333	0.533717
PufTMT	2	Ventricle	50	0.444444	0.478644
PufTMT	2	Ventricle	51	0.555556	0.434956
PufTMT	2	Ventricle	52	0.666667	0.395136
PufTMT	2	Ventricle	53	0.777778	0.361521
PufTMT	2	Ventricle	54	0.888889	0.331289
PufTMT	2	Ventricle	55	1	0.303619
PufTMT	2	Ventricle	56	1.11111	0.280024
PufTMT	2	Ventricle	57	1.22222	0.259434
PufTMT	2	Ventricle	58	1.33333	0.241875
PufTMT	2	Ventricle	59	1.44444	0.226153
PufTMT	2	Ventricle	60	1.55556	0.212984
PufTMT	2	Ventricle	61	1.66667	0.201587
PufTMT	2	Ventricle	62	1.77778	0.191117
PufTMT	2	Ventricle	63	1.88889	0.182022
PufTMT	2	Ventricle	64	2	0.174473
PufTMT	2	Ventricle	65	2.11111	0.167417
PufTMT	2	Ventricle	66	2.22222	0.159624
PufTMT	2	Ventricle	67	2.33333	0.154643
PufTMT	2	Ventricle	68	2.44444	0.150169
PufTMT	2	Ventricle	69	2.55556	0.145996
PufTMT	2	Ventricle	70	2.66667	0.141937
PufTMT	2	Ventricle	71	2.77778	0.13886
PufTMT	2	Ventricle	72	2.88889	0.136174
PufTMT	2	Ventricle	73	3	0.133653
PufTMT	2	Ventricle	74	3.11111	0.131032
PufTMT	2	Ventricle	75	3.22222	0.129132
PufTMT	2	Ventricle	76	3.33333	0.127078
PufTMT	2	Ventricle	77	3.44444	0.1255
PufTMT	2	Ventricle	78	3.55556	0.124079
PufTMT	2	Ventricle	79	3.66667	0.122367
PufTMT	2	Ventricle	80	3.77778	0.12132
PufTMT	2	Ventricle	81	3.88889	0.119615
PufTMT	2	Ventricle	82	4	0.11881
PufTMT	2	Ventricle	83	4.11111	0.118094
PufTMT	2	Ventricle	84	4.22222	0.117093
PufTMT	2	Ventricle	85	4.33333	0.115834
PufTMT	2	Ventricle	86	4.44444	0.167031
PufTMT	2	Ventricle	87	4.55556	0.1907
PufTMT	2	Ventricle	88	4.66667	0.181637
PufTMT	2	Ventricle	89	4.77778	0.194868
PufTMT	2	Ventricle	90	4.88889	0.243195
PufTMT	2	Ventricle	91	5	0.235202
PufTMT	2	Ventricle	92	5.11111	0.25719
PufTMT	2	Ventricle	93	5.22222	0.2816
PufTMT	2	Ventricle	94	5.33333	0.244586
PufTMT	2	Ventricle	95	5.44444	0.231661
PufTMT	2	Ventricle	96	5.55556	0.222936
PufTMT	2	Ventricle	97	5.66667	0.200369
PufTMT	2	Ventricle	98	5.77778	0.188479
PufTMT	2	Ventricle	99	5.88889	0.17816
PufTMT	2	Ventricle	100	6	0.18634
PufTMT	2	Ventricle	101	6.11111	0.233367
PufTMT	2	Ventricle	102	6.22222	0.225455
PufTMT	2	Ventricle	103	6.33333	0.245319
PufTMT	2	Ventricle	104	6.44444	0.270484
PufTMT	2	Ventricle	105	6.55556	0.251976
PufTMT	2	Ventricle	106	6.66667	0.286095
PufTMT	2	Ventricle	107	6.77778	0.289372
PufTMT	2	Ventricle	108	6.88889	0.267979
PufTMT	2	Ventricle	109	7	0.303226
PufTMT	2	Ventricle	110	7.11111	0.292395
PufTMT	2	Ventricle	111	7.22222	0.275379
PufTMT	2	Ventricle	112	7.33333	0.310318
PufTMT	2	Ventricle	113	7.44444	0.292264
PufTMT	2	Ventricle	114	7.55556	0.28696
PufTMT	2	Ventricle	115	7.66667	0.312449
PufTMT	2	Ventricle	116	7.77778	0.286894
PufTMT	2	Ventricle	117	7.88889	0.295028
PufTMT	2	Ventricle	118	8	0.312038
PufTMT	2	Ventricle	119	8.11111	0.282249
PufTMT	2	Ventricle	120	8.22222	0.298914
PufTMT	2	Ventricle	121	8.33333	0.308463
PufTMT	2	Ventricle	122	8.44444	0.277246
PufTMT	2	Ventricle	123	8.55556	0.301261
PufTMT	2	Ventricle	124	8.66667	0.306917
PufTMT	2	Ventricle	125	8.77778	0.278598
PufTMT	2	Ventricle	126	8.88889	0.311752
PufTMT	2	Ventricle	127	9	0.299201
PufTMT	2	Ventricle	128	9.11111	0.284931
PufTMT	2	Ventricle	129	9.22222	0.315103
PufTMT	2	Ventricle	130	9.33333	0.29066
PufTMT	2	Ventricle	131	9.44444	0.294358
PufTMT	2	Ventricle	132	9.55556	0.31314
PufTMT	2	Ventricle	133	9.66667	0.282813
PufTMT	2	Ventricle	134	9.77778	0.309323
PufTMT	2	Ventricle	135	9.88889	0.307095
PufTMT	2	Ventricle	136	10	0.281099
PufTMT	2	Ventricle	137	10.1111	0.315365
PufTMT	2	Ventricle	138	10.2222	0.298105
PufTMT	2	Ventricle	139	10.3333	0.289828
PufTMT	2	Ventricle	140	10.4444	0.315817
PufTMT	2	Ventricle	141	10.5556	0.28804
PufTMT	2	Ventricle	142	10.6667	0.303079
PufTMT	2	Ventricle	143	10.7778	0.308978
PufTMT	2	Ventricle	144	10.8889	0.280674
PufTMT	2	Ventricle	145	11	0.313359
PufTMT	2	Ventricle	146	11.1111	0.30123
PufTMT	2	Ventricle	147	11.2222	0.280134
PufTMT	2	Ventricle	148	11.3333	0.313334
PufTMT	2	Ventricle	149	11.4444	0.29355
PufTMT	2	Ventricle	150	11.5556	0.296356
PufTMT	2	Ventricle	151	11.6667	0.312027
PufTMT	2	Ventricle	152	11.7778	0.283206
PufTMT	2	Ventricle	153	11.8889	0.312001
PufTMT	2	Ventricle	154	12	0.305987
PufTMT	2	Ventricle	155	12.1111	0.282473
PufTMT	2	Ventricle	156	12.2222	0.315273
PufTMT	2	Ventricle	157	12.3333	0.295324
PufTMT	2	Ventricle	158	12.4444	0.28815
PufTMT	2	Ventricle	159	12.5556	0.313338
PufTMT	2	Ventricle	160	12.6667	0.286702
PufTMT	2	Ventricle	161	12.7778	0.30334
PufTMT	2	Ventricle	162	12.8889	0.308794
PufTMT	2	Ventricle	163	13	0.277256
PufTMT	2	Ventricle	164	13.1111	0.307264
PufTMT	2	Ventricle	165	13.2222	0.303537
PufTMT	2	Ventricle	166	13.3333	0.281324
PufTMT	2	Ventricle	167	13.4444	0.313072
PufTMT	2	Ventricle	168	13.5556	0.292489
PufTMT	2	Ventricle	169	13.6667	0.295228
PufTMT	2	Ventricle	170	13.7778	0.311961
PufTMT	2	Ventricle	171	13.8889	0.281417
PufTMT	2	Ventricle	172	14	0.31168
PufTMT	2	Ventricle	173	14.1111	0.305332
PufTMT	2	Ventricle	174	14.2222	0.284664
PufTMT	2	Ventricle	175	14.3333	0.316153
PufTMT	2	Ventricle	176	14.4444	0.293316
PufTMT	2	Ventricle	177	14.5556	0.290363
PufTMT	2	Ventricle	178	14.6667	0.314325
PufTMT	2	Ventricle	179	14.7778	0.286067
PufTMT	2	Ventricle	180	14.8889	0.301914
PufTMT	2	Ventricle	181	15	0.310394
PufTMT	2	Ventricle	182	15.1111	0.280438
PufTMT	2	Ventricle	183	15.2222	0.313878
PufTMT	2	Ventricle	184	15.3333	0.301205
PufTMT	2	Ventricle	185	15.4444	0.288541
PufTMT	2	Ventricle	186	15.5556	0.316288
PufTMT	2	Ventricle	187	15.6667	0.290772
PufTMT	2	Ventricle	188	15.7778	0.303526
PufTMT	2	Ventricle	189	15.8889	0.312195
PufTMT	2	Ventricle	190	16	0.282646
PufTMT	2	Ventricle	191	16.1111	0.315856
PufTMT	2	Ventricle	192	16.2222	0.301804
PufTMT	2	Ventricle	193	16.3333	0.284569
PufTMT	2	Ventricle	194	16.4444	0.316131
PufTMT	2	Ventricle	195	16.5556	0.292641
PufTMT	2	Ventricle	196	16.6667	0.296485
PufTMT	2	Ventricle	197	16.7778	0.311983
PufTMT	2	Ventricle	198	16.8889	0.281327
PufTMT	2	Ventricle	199	17	0.305694
PufTMT	2	Ventricle	200	17.1111	0.306586
PufTMT	2	Ventricle	201	17.2222	0.27441
PufTMT	2	Ventricle	202	17.3333	0.310657
PufTMT	2	Ventricle	203	17.4444	0.300582
PufTMT	2	Ventricle	204	17.5556	0.278597
PufTMT	2	Ventricle	205	17.6667	0.312433
PufTMT	2	Ventricle	206	17.7778	0.29302
PufTMT	2	Ventricle	207	17.8889	0.281932
PufTMT	2	Ventricle	208	18	0.311778
PufTMT	2	Ventricle	209	18.1111	0.283873
PufTMT	2	Ventricle	210	18.2222	0.297931
PufTMT	2	Ventricle	211	18.3333	0.307245
PufTMT	2	Ventricle	212	18.4444	0.275461
PufTMT	2	Ventricle	213	18.5556	0.310033
PufTMT	2	Ventricle	214	18.6667	0.300119
PufTMT	2	Ventricle	215	18.7778	0.276016
PufTMT	2	Ventricle	216	18.8889	0.312344
PufTMT	2	Ventricle	217	19	0.292541
PufTMT	2	Ventricle	218	19.1111	0.290432
PufTMT	2	Ventricle	219	19.2222	0.311308
PufTMT	2	Ventricle	220	19.3333	0.280069
PufTMT	2	Ventricle	221	19.4444	0.307917
PufTMT	2	Ventricle	222	19.5556	0.303379
PufTMT	2	Ventricle	223	19.6667	0.281348
PufTMT	2	Ventricle	224	19.7778	0.314817
PufTMT	2	Ventricle	225	19.8889	0.294602
PufTMT	2	Ventricle	226	20	0.295643
PufTMT	2	Ventricle	227	20.1111	0.313281
PufTMT	2	Ventricle	228	20.2222	0.28125
PufTMT	2	Ventricle	229	20.3333	0.309392
PufTMT	2	Ventricle	230	20.4444	0.30591
PufTMT	2	Ventricle	231	20.5556	0.28643
PufTMT	2	Ventricle	232	20.6667	0.31474
PufTMT	2	Ventricle	233	20.7778	0.292527
PufTMT	2	Ventricle	234	20.8889	0.302187
PufTMT	2	Ventricle	235	21	0.311713
PufTMT	2	Ventricle	236	21.1111	0.280282
PufTMT	2	Ventricle	237	21.2222	0.314388
PufTMT	2	Ventricle	238	21.3333	0.300196
PufTMT	2	Ventricle	239	21.4444	0.286157
PufTMT	2	Ventricle	240	21.5556	0.315588
PufTMT	2	Ventricle	241	21.6667	0.289456
PufTMT	2	Ventricle	242	21.7778	0.307793
PufTMT	2	Ventricle	243	21.8889	0.309946
PufTMT	2	Ventricle	244	22	0.283284
PufTMT	2	Ventricle	245	22.1111	0.316706
PufTMT	2	Ventricle	246	22.2222	0.297907
PufTMT	2	Ventricle	247	22.3333	0.294009
PufTMT	2	Ventricle	248	22.4444	0.315784
PufTMT	2	Ventricle	249	22.5556	0.285661
PufTMT	2	Ventricle	250	22.6667	0.28008
PufTMT	2	Ventricle	251	22.7778	0.309774
PufTMT	2	Ventricle	252	22.8889	0.282174
PufTMT	2	Ventricle	253	23	0.293036
PufTMT	2	Ventricle	254	23.1111	0.306421
PufTMT	2	Ventricle	255	23.2222	0.277502
PufTMT	2	Ventricle	256	23.3333	0.312246
PufTMT	2	Ventricle	257	23.4444	0.297448
PufTMT	2	Ventricle	258	23.5556	0.288361
PufTMT	2	Ventricle	259	23.6667	0.31256
PufTMT	2	Ventricle	260	23.7778	0.285233
PufTMT	2	Ventricle	261	23.8889	0.286807
PufTMT	2	Ventricle	262	24	0.308468
PufTMT	2	Ventricle	263	24.1111	0.279509
PufTMT	2	Ventricle	264	24.2222	0.304885
PufTMT	2	Ventricle	265	24.3333	0.302605
PufTMT	2	Ventricle	266	24.4444	0.282148
PufTMT	3	Ventricle	1	-5	0.0437072
PufTMT	3	Ventricle	2	-4.88889	0.0437035
PufTMT	3	Ventricle	3	-4.77778	0.043694
PufTMT	3	Ventricle	4	-4.66667	0.0436955
PufTMT	3	Ventricle	5	-4.55556	0.0436969
PufTMT	3	Ventricle	6	-4.44444	0.0437042
PufTMT	3	Ventricle	7	-4.33333	0.0437013
PufTMT	3	Ventricle	8	-4.22222	0.0436999
PufTMT	3	Ventricle	9	-4.11111	0.0437079
PufTMT	3	Ventricle	10	-4	0.0437028
PufTMT	3	Ventricle	11	-3.88889	0.043702
PufTMT	3	Ventricle	12	-3.77778	0.0436911
PufTMT	3	Ventricle	13	-3.66667	0.0437042
PufTMT	3	Ventricle	14	-3.55556	0.0436955
PufTMT	3	Ventricle	15	-3.44444	0.0436991
PufTMT	3	Ventricle	16	-3.33333	0.0436955
PufTMT	3	Ventricle	17	-3.22222	0.0436926
PufTMT	3	Ventricle	18	-3.11111	0.0436889
PufTMT	3	Ventricle	19	-3	0.0436772
PufTMT	3	Ventricle	20	-2.88889	0.0436955
PufTMT	3	Ventricle	21	-2.77778	0.0436948
PufTMT	3	Ventricle	22	-2.66667	0.0437072
PufTMT	3	Ventricle	23	-2.55556	0.0436889
PufTMT	3	Ventricle	24	-2.44444	0.0437072
PufTMT	3	Ventricle	25	-2.33333	0.0436896
PufTMT	3	Ventricle	26	-2.22222	0.0436991
PufTMT	3	Ventricle	27	-2.11111	0.0436926
PufTMT	3	Ventricle	28	-2	0.0436999
PufTMT	3	Ventricle	29	-1.88889	0.0437101
PufTMT	3	Ventricle	30	-1.77778	0.0437013
PufTMT	3	Ventricle	31	-1.66667	0.0436962
PufTMT	3	Ventricle	32	-1.55556	0.0437072
PufTMT	3	Ventricle	33	-1.44444	0.043705
PufTMT	3	Ventricle	34	-1.33333	0.0437013
PufTMT	3	Ventricle	35	-1.22222	0.043702
PufTMT	3	Ventricle	36	-1.11111	0.0436977
PufTMT	3	Ventricle	37	-1	0.0437042
PufTMT	3	Ventricle	38	-0.888889	0.043694
PufTMT	3	Ventricle	39	-0.777778	0.0436896
PufTMT	3	Ventricle	40	-0.666667	0.0436765
PufTMT	3	Ventricle	41	-0.555556	0.0436685
PufTMT	3	Ventricle	42	-0.444444	0.0436751
PufTMT	3	Ventricle	43	-0.333333	0.0436875
PufTMT	3	Ventricle	44	-0.222222	0.0436984
PufTMT	3	Ventricle	45	-0.111111	0.0437269
PufTMT	3	Ventricle	46	0	0.0438253
PufTMT	3	Ventricle	47	0.111111	0.0952727
PufTMT	3	Ventricle	48	0.222222	0.393602
PufTMT	3	Ventricle	49	0.333333	0.366172
PufTMT	3	Ventricle	50	0.444444	0.344212
PufTMT	3	Ventricle	51	0.555556	0.357559
PufTMT	3	Ventricle	52	0.666667	0.343295
PufTMT	3	Ventricle	53	0.777778	0.314881
PufTMT	3	Ventricle	54	0.888889	0.29358
PufTMT	3	Ventricle	55	1	0.309372
PufTMT	3	Ventricle	56	1.11111	0.306124
PufTMT	3	Ventricle	57	1.22222	0.283768
PufTMT	3	Ventricle	58	1.33333	0.262022
PufTMT	3	Ventricle	59	1.44444	0.277907
PufTMT	3	Ventricle	60	1.55556	0.278313
PufTMT	3	Ventricle	61	1.66667	0.259243
PufTMT	3	Ventricle	62	1.77778	0.239353
PufTMT	3	Ventricle	63	1.88889	0.254308
PufTMT	3	Ventricle	64	2	0.259009
PufTMT	3	Ventricle	65	2.11111	0.242608
PufTMT	3	Ventricle	66	2.22222	0.221939
PufTMT	3	Ventricle	67	2.33333	0.231695
PufTMT	3	Ventricle	68	2.44444	0.240561
PufTMT	3	Ventricle	69	2.55556	0.229109
PufTMT	3	Ventricle	70	2.66667	0.212037
PufTMT	3	Ventricle	71	2.77778	0.214735
PufTMT	3	Ventricle	72	2.88889	0.228131
PufTMT	3	Ventricle	73	3	0.221263
PufTMT	3	Ventricle	74	3.11111	0.206464
PufTMT	3	Ventricle	75	3.22222	0.201072
PufTMT	3	Ventricle	76	3.33333	0.218847
PufTMT	3	Ventricle	77	3.44444	0.218391
PufTMT	3	Ventricle	78	3.55556	0.203608
PufTMT	3	Ventricle	79	3.66667	0.188142
PufTMT	3	Ventricle	80	3.77778	0.127709
PufTMT	3	Ventricle	81	3.88889	0.0436853
PufTMT	3	Ventricle	82	4	0.0436831
PufTMT	3	Ventricle	83	4.11111	0.0436802
PufTMT	3	Ventricle	84	4.22222	0.0436743
PufTMT	3	Ventricle	85	4.33333	0.0436772
PufTMT	3	Ventricle	86	4.44444	0.0436831
PufTMT	3	Ventricle	87	4.55556	0.043686
PufTMT	3	Ventricle	88	4.66667	0.0436809
PufTMT	3	Ventricle	89	4.77778	0.0436882
PufTMT	3	Ventricle	90	4.88889	0.0436772
PufTMT	3	Ventricle	91	5	0.0436714
PufTMT	3	Ventricle	92	5.11111	0.0436663
PufTMT	3	Ventricle	93	5.22222	0.0436794
PufTMT	3	Ventricle	94	5.33333	0.0436743
PufTMT	3	Ventricle	95	5.44444	0.0436831
PufTMT	3	Ventricle	96	5.55556	0.0436838
PufTMT	3	Ventricle	97	5.66667	0.0436678
PufTMT	3	Ventricle	98	5.77778	0.0436772
PufTMT	3	Ventricle	99	5.88889	0.0436729
PufTMT	3	Ventricle	100	6	0.043686
PufTMT	3	Ventricle	101	6.11111	0.0436838
PufTMT	3	Ventricle	102	6.22222	0.0436758
PufTMT	3	Ventricle	103	6.33333	0.0436896
PufTMT	3	Ventricle	104	6.44444	0.0436867
PufTMT	3	Ventricle	105	6.55556	0.0436743
PufTMT	3	Ventricle	106	6.66667	0.0436853
PufTMT	3	Ventricle	107	6.77778	0.0436802
PufTMT	3	Ventricle	108	6.88889	0.0436765
PufTMT	3	Ventricle	109	7	0.0436802
PufTMT	3	Ventricle	110	7.11111	0.0436751
PufTMT	3	Ventricle	111	7.22222	0.04367
PufTMT	3	Ventricle	112	7.33333	0.0436758
PufTMT	3	Ventricle	113	7.44444	0.0436787
PufTMT	3	Ventricle	114	7.55556	0.0436809
PufTMT	3	Ventricle	115	7.66667	0.0436809
PufTMT	3	Ventricle	116	7.77778	0.0436853
PufTMT	3	Ventricle	117	7.88889	0.0436853
PufTMT	3	Ventricle	118	8	0.0436743
PufTMT	3	Ventricle	119	8.11111	0.0436751
PufTMT	3	Ventricle	120	8.22222	0.0436875
PufTMT	3	Ventricle	121	8.33333	0.0436787
PufTMT	3	Ventricle	122	8.44444	0.0436824
PufTMT	3	Ventricle	123	8.55556	0.0436853
PufTMT	3	Ventricle	124	8.66667	0.043678
PufTMT	3	Ventricle	125	8.77778	0.0436882
PufTMT	3	Ventricle	126	8.88889	0.0436882
PufTMT	3	Ventricle	127	9	0.0437174
PufTMT	3	Ventricle	128	9.11111	0.0437196
PufTMT	3	Ventricle	129	9.22222	0.0437341
PufTMT	3	Ventricle	130	9.33333	0.0437217
PufTMT	3	Ventricle	131	9.44444	0.0437429
PufTMT	3	Ventricle	132	9.55556	0.0535513
PufTMT	3	Ventricle	133	9.66667	0.186327
PufTMT	3	Ventricle	134	9.77778	0.236095
PufTMT	3	Ventricle	135	9.88889	0.222643
PufTMT	3	Ventricle	136	10	0.207788
PufTMT	3	Ventricle	137	10.1111	0.218478
PufTMT	3	Ventricle	138	10.2222	0.223162
PufTMT	3	Ventricle	139	10.3333	0.210917
PufTMT	3	Ventricle	140	10.4444	0.196162
PufTMT	3	Ventricle	141	10.5556	0.203744
PufTMT	3	Ventricle	142	10.6667	0.2124
PufTMT	3	Ventricle	143	10.7778	0.202343
PufTMT	3	Ventricle	144	10.8889	0.18986
PufTMT	3	Ventricle	145	11	0.195081
PufTMT	3	Ventricle	146	11.1111	0.174532
PufTMT	3	Ventricle	147	11.2222	0.043702
PufTMT	3	Ventricle	148	11.3333	0.0436999
PufTMT	3	Ventricle	149	11.4444	0.0437093
PufTMT	3	Ventricle	150	11.5556	0.0437086
PufTMT	3	Ventricle	151	11.6667	0.0437101
PufTMT	3	Ventricle	152	11.7778	0.0437137
PufTMT	3	Ventricle	153	11.8889	0.0437137
PufTMT	3	Ventricle	154	12	0.0437166
PufTMT	3	Ventricle	155	12.1111	0.0437269
PufTMT	3	Ventricle	156	12.2222	0.0574535
PufTMT	3	Ventricle	157	12.3333	0.189413
PufTMT	3	Ventricle	158	12.4444	0.210395
PufTMT	3	Ventricle	159	12.5556	0.217072
PufTMT	3	Ventricle	160	12.6667	0.205407
PufTMT	3	Ventricle	161	12.7778	0.191905
PufTMT	3	Ventricle	162	12.8889	0.199149
PufTMT	3	Ventricle	163	13	0.207521
PufTMT	3	Ventricle	164	13.1111	0.196696
PufTMT	3	Ventricle	165	13.2222	0.182168
PufTMT	3	Ventricle	166	13.3333	0.116007
PufTMT	3	Ventricle	167	13.4444	0.0436977
PufTMT	3	Ventricle	168	13.5556	0.0436875
PufTMT	3	Ventricle	169	13.6667	0.0436933
PufTMT	3	Ventricle	170	13.7778	0.0436926
PufTMT	3	Ventricle	171	13.8889	0.043694
PufTMT	3	Ventricle	172	14	0.0436962
PufTMT	3	Ventricle	173	14.1111	0.0437217
PufTMT	3	Ventricle	174	14.2222	0.0441682
PufTMT	3	Ventricle	175	14.3333	0.0548689
PufTMT	3	Ventricle	176	14.4444	0.128631
PufTMT	3	Ventricle	177	14.5556	0.150445
PufTMT	3	Ventricle	178	14.6667	0.186218
PufTMT	3	Ventricle	179	14.7778	0.210264
PufTMT	3	Ventricle	180	14.8889	0.215916
PufTMT	3	Ventricle	181	15	0.203946
PufTMT	3	Ventricle	182	15.1111	0.192411
PufTMT	3	Ventricle	183	15.2222	0.201633
PufTMT	3	Ventricle	184	15.3333	0.209147
PufTMT	3	Ventricle	185	15.4444	0.201056
PufTMT	3	Ventricle	186	15.5556	0.188629
PufTMT	3	Ventricle	187	15.6667	0.19729
PufTMT	3	Ventricle	188	15.7778	0.206159
PufTMT	3	Ventricle	189	15.8889	0.166312
PufTMT	3	Ventricle	190	16	0.0436889
PufTMT	3	Ventricle	191	16.1111	0.0436772
PufTMT	3	Ventricle	192	16.2222	0.0436765
PufTMT	3	Ventricle	193	16.3333	0.0436736
PufTMT	3	Ventricle	194	16.4444	0.0436751
PufTMT	3	Ventricle	195	16.5556	0.0436787
PufTMT	3	Ventricle	196	16.6667	0.04367
PufTMT	3	Ventricle	197	16.7778	0.0436721
PufTMT	3	Ventricle	198	16.8889	0.0436612
PufTMT	3	Ventricle	199	17	0.0436809
PufTMT	3	Ventricle	200	17.1111	0.0436896
PufTMT	3	Ventricle	201	17.2222	0.0436824
PufTMT	3	Ventricle	202	17.3333	0.0436948
PufTMT	3	Ventricle	203	17.4444	0.0437101
PufTMT	3	Ventricle	204	17.5556	0.0437152
PufTMT	3	Ventricle	205	17.6667	0.0437261
PufTMT	3	Ventricle	206	17.7778	0.0437283
PufTMT	3	Ventricle	207	17.8889	0.0437611
PufTMT	3	Ventricle	208	18	0.056109
PufTMT	3	Ventricle	209	18.1111	0.15579
PufTMT	3	Ventricle	210	18.2222	0.184161
PufTMT	3	Ventricle	211	18.3333	0.2086
PufTMT	3	Ventricle	212	18.4444	0.206609
PufTMT	3	Ventricle	213	18.5556	0.217131
PufTMT	3	Ventricle	214	18.6667	0.208497
PufTMT	3	Ventricle	215	18.7778	0.193531
PufTMT	3	Ventricle	216	18.8889	0.194635
PufTMT	3	Ventricle	217	19	0.206772
PufTMT	3	Ventricle	218	19.1111	0.201584
PufTMT	3	Ventricle	219	19.2222	0.188576
PufTMT	3	Ventricle	220	19.3333	0.185998
PufTMT	3	Ventricle	221	19.4444	0.102105
PufTMT	3	Ventricle	222	19.5556	0.0436656
PufTMT	3	Ventricle	223	19.6667	0.0436729
PufTMT	3	Ventricle	224	19.7778	0.0436765
PufTMT	3	Ventricle	225	19.8889	0.043678
PufTMT	3	Ventricle	226	20	0.0436729
PufTMT	3	Ventricle	227	20.1111	0.04367
PufTMT	3	Ventricle	228	20.2222	0.0436692
PufTMT	3	Ventricle	229	20.3333	0.0436678
PufTMT	3	Ventricle	230	20.4444	0.0436809
PufTMT	3	Ventricle	231	20.5556	0.0437662
PufTMT	3	Ventricle	232	20.6667	0.0462897
PufTMT	3	Ventricle	233	20.7778	0.0469287
PufTMT	3	Ventricle	234	20.8889	0.0471403
PufTMT	3	Ventricle	235	21	0.0471469
PufTMT	3	Ventricle	236	21.1111	0.0481974
PufTMT	3	Ventricle	237	21.2222	0.0506004
PufTMT	3	Ventricle	238	21.3333	0.0924867
PufTMT	3	Ventricle	239	21.4444	0.171545
PufTMT	3	Ventricle	240	21.5556	0.183226
PufTMT	3	Ventricle	241	21.6667	0.202095
PufTMT	3	Ventricle	242	21.7778	0.213448
PufTMT	3	Ventricle	243	21.8889	0.21475
PufTMT	3	Ventricle	244	22	0.200063
PufTMT	3	Ventricle	245	22.1111	0.190659
PufTMT	3	Ventricle	246	22.2222	0.204989
PufTMT	3	Ventricle	247	22.3333	0.207965
PufTMT	3	Ventricle	248	22.4444	0.196085
PufTMT	3	Ventricle	249	22.5556	0.187367
PufTMT	3	Ventricle	250	22.6667	0.200983
PufTMT	3	Ventricle	251	22.7778	0.203333
PufTMT	3	Ventricle	252	22.8889	0.179226
PufTMT	3	Ventricle	253	23	0.0437801
PufTMT	3	Ventricle	254	23.1111	0.0436984
PufTMT	3	Ventricle	255	23.2222	0.0437093
PufTMT	3	Ventricle	256	23.3333	0.0437072
PufTMT	3	Ventricle	257	23.4444	0.0436933
PufTMT	3	Ventricle	258	23.5556	0.0437217
PufTMT	3	Ventricle	259	23.6667	0.0437137
PufTMT	3	Ventricle	260	23.7778	0.0437057
PufTMT	3	Ventricle	261	23.8889	0.0437013
PufTMT	3	Ventricle	262	24	0.0437093
PufTMT	3	Ventricle	263	24.1111	0.0437079
PufTMT	3	Ventricle	264	24.2222	0.0437174
PufTMT	3	Ventricle	265	24.3333	0.0437261
PufTMT	3	Ventricle	266	24.4444	0.0437276
PufTMT	4	Ventricle	1	-5	0.040846
PufTMT	4	Ventricle	2	-4.88889	0.0408606
PufTMT	4	Ventricle	3	-4.77778	0.0409773
PufTMT	4	Ventricle	4	-4.66667	0.0410065
PufTMT	4	Ventricle	5	-4.55556	0.0408679
PufTMT	4	Ventricle	6	-4.44444	0.0408533
PufTMT	4	Ventricle	7	-4.33333	0.0408606
PufTMT	4	Ventricle	8	-4.22222	0.0409335
PufTMT	4	Ventricle	9	-4.11111	0.0409627
PufTMT	4	Ventricle	10	-4	0.0409408
PufTMT	4	Ventricle	11	-3.88889	0.0409189
PufTMT	4	Ventricle	12	-3.77778	0.0408095
PufTMT	4	Ventricle	13	-3.66667	0.0409116
PufTMT	4	Ventricle	14	-3.55556	0.040773
PufTMT	4	Ventricle	15	-3.44444	0.0408606
PufTMT	4	Ventricle	16	-3.33333	0.0408095
PufTMT	4	Ventricle	17	-3.22222	0.0408824
PufTMT	4	Ventricle	18	-3.11111	0.0407657
PufTMT	4	Ventricle	19	-3	0.0407876
PufTMT	4	Ventricle	20	-2.88889	0.0407803
PufTMT	4	Ventricle	21	-2.77778	0.040846
PufTMT	4	Ventricle	22	-2.66667	0.0408824
PufTMT	4	Ventricle	23	-2.55556	0.04097
PufTMT	4	Ventricle	24	-2.44444	0.0409043
PufTMT	4	Ventricle	25	-2.33333	0.0407584
PufTMT	4	Ventricle	26	-2.22222	0.0409554
PufTMT	4	Ventricle	27	-2.11111	0.0409919
PufTMT	4	Ventricle	28	-2	0.040897
PufTMT	4	Ventricle	29	-1.88889	0.040897
PufTMT	4	Ventricle	30	-1.77778	0.040773
PufTMT	4	Ventricle	31	-1.66667	0.040773
PufTMT	4	Ventricle	32	-1.55556	0.0408824
PufTMT	4	Ventricle	33	-1.44444	0.0407876
PufTMT	4	Ventricle	34	-1.33333	0.0408314
PufTMT	4	Ventricle	35	-1.22222	0.0408533
PufTMT	4	Ventricle	36	-1.11111	0.0409262
PufTMT	4	Ventricle	37	-1	0.040846
PufTMT	4	Ventricle	38	-0.888889	0.0408533
PufTMT	4	Ventricle	39	-0.777778	0.0408897
PufTMT	4	Ventricle	40	-0.666667	0.0409846
PufTMT	4	Ventricle	41	-0.555556	0.0408679
PufTMT	4	Ventricle	42	-0.444444	0.0409116
PufTMT	4	Ventricle	43	-0.333333	0.0408751
PufTMT	4	Ventricle	44	-0.222222	0.0407219
PufTMT	4	Ventricle	45	-0.111111	0.0409043
PufTMT	4	Ventricle	46	0	0.712671
PufTMT	4	Ventricle	47	0.111111	1.19109
PufTMT	4	Ventricle	48	0.222222	1.13196
PufTMT	4	Ventricle	49	0.333333	1.01463
PufTMT	4	Ventricle	50	0.444444	0.873443
PufTMT	4	Ventricle	51	0.555556	0.751729
PufTMT	4	Ventricle	52	0.666667	0.684292
PufTMT	4	Ventricle	53	0.777778	0.73646
PufTMT	4	Ventricle	54	0.888889	0.649129
PufTMT	4	Ventricle	55	1	0.565358
PufTMT	4	Ventricle	56	1.11111	0.49574
PufTMT	4	Ventricle	57	1.22222	0.435613
PufTMT	4	Ventricle	58	1.33333	0.509615
PufTMT	4	Ventricle	59	1.44444	0.494945
PufTMT	4	Ventricle	60	1.55556	0.454266
PufTMT	4	Ventricle	61	1.66667	0.524716
PufTMT	4	Ventricle	62	1.77778	0.479471
PufTMT	4	Ventricle	63	1.88889	0.426938
PufTMT	4	Ventricle	64	2	0.380986
PufTMT	4	Ventricle	65	2.11111	0.375981
PufTMT	4	Ventricle	66	2.22222	0.4494
PufTMT	4	Ventricle	67	2.33333	0.407913
PufTMT	4	Ventricle	68	2.44444	0.455536
PufTMT	4	Ventricle	69	2.55556	0.460336
PufTMT	4	Ventricle	70	2.66667	0.421277
PufTMT	4	Ventricle	71	2.77778	0.490217
PufTMT	4	Ventricle	72	2.88889	0.448029
PufTMT	4	Ventricle	73	3	0.475452
PufTMT	4	Ventricle	74	3.11111	0.482083
PufTMT	4	Ventricle	75	3.22222	0.432534
PufTMT	4	Ventricle	76	3.33333	0.498833
PufTMT	4	Ventricle	77	3.44444	0.461992
PufTMT	4	Ventricle	78	3.55556	0.462787
PufTMT	4	Ventricle	79	3.66667	0.487992
PufTMT	4	Ventricle	80	3.77778	0.435364
PufTMT	4	Ventricle	81	3.88889	0.471797
PufTMT	4	Ventricle	82	4	0.468521
PufTMT	4	Ventricle	83	4.11111	0.41976
PufTMT	4	Ventricle	84	4.22222	0.371903
PufTMT	4	Ventricle	85	4.33333	0.416667
PufTMT	4	Ventricle	86	4.44444	0.428244
PufTMT	4	Ventricle	87	4.55556	0.400727
PufTMT	4	Ventricle	88	4.66667	0.464764
PufTMT	4	Ventricle	89	4.77778	0.421795
PufTMT	4	Ventricle	90	4.88889	0.47079
PufTMT	4	Ventricle	91	5	0.45771
PufTMT	4	Ventricle	92	5.11111	0.420096
PufTMT	4	Ventricle	93	5.22222	0.480916
PufTMT	4	Ventricle	94	5.33333	0.439158
PufTMT	4	Ventricle	95	5.44444	0.40042
PufTMT	4	Ventricle	96	5.55556	0.463116
PufTMT	4	Ventricle	97	5.66667	0.424925
PufTMT	4	Ventricle	98	5.77778	0.407088
PufTMT	4	Ventricle	99	5.88889	0.459971
PufTMT	4	Ventricle	100	6	0.416893
PufTMT	4	Ventricle	101	6.11111	0.439165
PufTMT	4	Ventricle	102	6.22222	0.45191
PufTMT	4	Ventricle	103	6.33333	0.409218
PufTMT	4	Ventricle	104	6.44444	0.471979
PufTMT	4	Ventricle	105	6.55556	0.442251
PufTMT	4	Ventricle	106	6.66667	0.452085
PufTMT	4	Ventricle	107	6.77778	0.469616
PufTMT	4	Ventricle	108	6.88889	0.426654
PufTMT	4	Ventricle	109	7	0.486825
PufTMT	4	Ventricle	110	7.11111	0.447832
PufTMT	4	Ventricle	111	7.22222	0.462401
PufTMT	4	Ventricle	112	7.33333	0.47152
PufTMT	4	Ventricle	113	7.44444	0.437495
PufTMT	4	Ventricle	114	7.55556	0.488
PufTMT	4	Ventricle	115	7.66667	0.440405
PufTMT	4	Ventricle	116	7.77778	0.485534
PufTMT	4	Ventricle	117	7.88889	0.46464
PufTMT	4	Ventricle	118	8	0.458731
PufTMT	4	Ventricle	119	8.11111	0.483652
PufTMT	4	Ventricle	120	8.22222	0.443718
PufTMT	4	Ventricle	121	8.33333	0.497235
PufTMT	4	Ventricle	122	8.44444	0.448248
PufTMT	4	Ventricle	123	8.55556	0.489108
PufTMT	4	Ventricle	124	8.66667	0.467653
PufTMT	4	Ventricle	125	8.77778	0.461861
PufTMT	4	Ventricle	126	8.88889	0.482258
PufTMT	4	Ventricle	127	9	0.441901
PufTMT	4	Ventricle	128	9.11111	0.493048
PufTMT	4	Ventricle	129	9.22222	0.450553
PufTMT	4	Ventricle	130	9.33333	0.400515
PufTMT	4	Ventricle	131	9.44444	0.463612
PufTMT	4	Ventricle	132	9.55556	0.432935
PufTMT	4	Ventricle	133	9.66667	0.455667
PufTMT	4	Ventricle	134	9.77778	0.460445
PufTMT	4	Ventricle	135	9.88889	0.431213
PufTMT	4	Ventricle	136	10	0.482156
PufTMT	4	Ventricle	137	10.1111	0.434854
[truncated: 129 more rows]

## Sheet: C
Line	Frame	X	Y
LamPP	1	-10	0.96243
LamPP	2	-9.96667	0.964836
LamPP	3	-9.93333	0.963429
LamPP	4	-9.9	0.964836
LamPP	5	-9.86667	0.962874
LamPP	6	-9.83333	0.963059
LamPP	7	-9.8	0.964466
LamPP	8	-9.76667	0.949882
LamPP	9	-9.73333	0.955989
LamPP	10	-9.7	0.973867
LamPP	11	-9.66667	0.984009
LamPP	12	-9.63333	0.982011
LamPP	13	-9.6	0.980308
LamPP	14	-9.56667	0.973349
LamPP	15	-9.53333	0.975718
LamPP	16	-9.5	1.00596
LamPP	17	-9.46667	1.00011
LamPP	18	-9.43333	0.997594
LamPP	19	-9.4	0.986601
LamPP	20	-9.36667	0.969499
LamPP	21	-9.33333	0.972312
LamPP	22	-9.3	0.980974
LamPP	23	-9.26667	1.00903
LamPP	24	-9.23333	1.01503
LamPP	25	-9.2	0.991079
LamPP	26	-9.16667	0.975126
LamPP	27	-9.13333	0.968759
LamPP	28	-9.1	0.961801
LamPP	29	-9.06667	1.00592
LamPP	30	-9.03333	1.00703
LamPP	31	-9	0.987489
LamPP	32	-8.96667	0.975274
LamPP	33	-8.93333	0.978827
LamPP	34	-8.9	0.967722
LamPP	35	-8.86667	1.005
LamPP	36	-8.83333	1.00914
LamPP	37	-8.8	1.01107
LamPP	38	-8.76667	0.979049
LamPP	39	-8.73333	0.97557
LamPP	40	-8.7	0.970092
LamPP	41	-8.66667	0.969055
LamPP	42	-8.63333	1.01688
LamPP	43	-8.6	1.0131
LamPP	44	-8.56667	0.987044
LamPP	45	-8.53333	0.982085
LamPP	46	-8.5	0.97631
LamPP	47	-8.46667	0.969204
LamPP	48	-8.43333	0.977273
LamPP	49	-8.4	1.0121
LamPP	50	-8.36667	1.00355
LamPP	51	-8.33333	0.976828
LamPP	52	-8.3	0.970536
LamPP	53	-8.26667	0.966686
LamPP	54	-8.23333	0.982825
LamPP	55	-8.2	1.00681
LamPP	56	-8.16667	1.0171
LamPP	57	-8.13333	0.991524
LamPP	58	-8.1	0.983417
LamPP	59	-8.06667	0.973201
LamPP	60	-8.03333	0.969351
LamPP	61	-8	1.00385
LamPP	62	-7.96667	1.02084
LamPP	63	-7.93333	1.00933
LamPP	64	-7.9	0.974756
LamPP	65	-7.86667	0.973497
LamPP	66	-7.83333	0.965206
LamPP	67	-7.8	0.979346
LamPP	68	-7.76667	1.00589
LamPP	69	-7.73333	1.00589
LamPP	70	-7.7	0.982603
LamPP	71	-7.66667	0.981937
LamPP	72	-7.63333	0.973793
LamPP	73	-7.6	0.971572
LamPP	74	-7.56667	1.00485
LamPP	75	-7.53333	1.00973
LamPP	76	-7.5	0.990339
LamPP	77	-7.46667	0.975866
LamPP	78	-7.43333	0.978235
LamPP	79	-7.4	0.972164
LamPP	80	-7.36667	1.01299
LamPP	81	-7.33333	1.01555
LamPP	82	-7.3	1.02617
LamPP	83	-7.26667	0.996669
LamPP	84	-7.23333	0.977199
LamPP	85	-7.2	0.973793
LamPP	86	-7.16667	0.976014
LamPP	87	-7.13333	1.01618
LamPP	88	-7.1	1.02336
LamPP	89	-7.06667	0.988821
LamPP	90	-7.03333	0.973497
LamPP	91	-7	0.973497
LamPP	92	-6.96667	0.97098
LamPP	93	-6.93333	1.00607
LamPP	94	-6.9	1.01595
LamPP	95	-6.86667	1.01729
LamPP	96	-6.83333	0.968019
LamPP	97	-6.8	0.974977
LamPP	98	-6.76667	0.974534
LamPP	99	-6.73333	0.972461
LamPP	100	-6.7	1.01854
LamPP	101	-6.66667	1.02069
LamPP	102	-6.63333	0.986453
LamPP	103	-6.6	0.977791
LamPP	104	-6.56667	0.969351
LamPP	105	-6.53333	0.965206
LamPP	106	-6.5	1.00592
LamPP	107	-6.46667	1.01695
LamPP	108	-6.43333	1.00126
LamPP	109	-6.4	0.971498
LamPP	110	-6.36667	0.971276
LamPP	111	-6.33333	0.97483
LamPP	112	-6.3	0.983417
LamPP	113	-6.26667	1.00814
LamPP	114	-6.23333	1.01725
LamPP	115	-6.2	0.983084
LamPP	116	-6.16667	0.972461
LamPP	117	-6.13333	0.974089
LamPP	118	-6.1	0.973201
LamPP	119	-6.06667	0.992041
LamPP	120	-6.03333	1.01299
LamPP	121	-6	0.995669
LamPP	122	-5.96667	0.979272
LamPP	123	-5.93333	0.977199
LamPP	124	-5.9	0.972461
LamPP	125	-5.86667	0.994115
LamPP	126	-5.83333	1.01273
LamPP	127	-5.8	1.01817
LamPP	128	-5.76667	0.996706
LamPP	129	-5.73333	0.977199
LamPP	130	-5.7	0.972905
LamPP	131	-5.66667	0.967427
LamPP	132	-5.63333	1.0084
LamPP	133	-5.6	1.01103
LamPP	134	-5.56667	0.981604
LamPP	135	-5.53333	0.975274
LamPP	136	-5.5	0.97705
LamPP	137	-5.46667	0.970684
LamPP	138	-5.43333	0.99937
LamPP	139	-5.4	1.0087
LamPP	140	-5.36667	1.01699
LamPP	141	-5.33333	0.980974
LamPP	142	-5.3	0.979864
LamPP	143	-5.26667	0.969204
LamPP	144	-5.23333	0.97557
LamPP	145	-5.2	1.01688
LamPP	146	-5.16667	1.02184
LamPP	147	-5.13333	0.986749
LamPP	148	-5.1	0.979864
LamPP	149	-5.06667	0.974237
LamPP	150	-5.03333	0.976754
LamPP	151	-5	1.00948
LamPP	152	-4.96667	1.02099
LamPP	153	-4.93333	1.00911
LamPP	154	-4.9	0.988969
LamPP	155	-4.86667	0.97705
LamPP	156	-4.83333	0.967427
LamPP	157	-4.8	0.977791
LamPP	158	-4.76667	1.00785
LamPP	159	-4.73333	1.01814
LamPP	160	-4.7	0.995781
LamPP	161	-4.66667	0.980752
LamPP	162	-4.63333	0.976607
LamPP	163	-4.6	0.966834
LamPP	164	-4.56667	1.01347
LamPP	165	-4.53333	1.01566
LamPP	166	-4.5	1.00707
LamPP	167	-4.46667	0.982455
LamPP	168	-4.43333	0.978383
LamPP	169	-4.4	0.969944
LamPP	170	-4.36667	0.985564
LamPP	171	-4.33333	1.01303
LamPP	172	-4.3	1.01858
LamPP	173	-4.26667	0.981715
LamPP	174	-4.23333	0.985342
LamPP	175	-4.2	0.98016
LamPP	176	-4.16667	0.972757
LamPP	177	-4.13333	1.00744
LamPP	178	-4.1	1.01551
LamPP	179	-4.06667	0.997002
LamPP	180	-4.03333	0.981418
LamPP	181	-4	0.974534
LamPP	182	-3.96667	0.97024
LamPP	183	-3.93333	0.989488
LamPP	184	-3.9	1.00385
LamPP	185	-3.86667	1.00692
LamPP	186	-3.83333	0.981123
LamPP	187	-3.8	0.971276
LamPP	188	-3.76667	0.970536
LamPP	189	-3.73333	0.969647
LamPP	190	-3.7	1.01114
LamPP	191	-3.66667	1.02069
LamPP	192	-3.63333	1.0151
LamPP	193	-3.6	0.979864
LamPP	194	-3.56667	0.974977
LamPP	195	-3.53333	0.971869
LamPP	196	-3.5	1.0184
LamPP	197	-3.46667	1.01259
LamPP	198	-3.43333	1.01951
LamPP	199	-3.4	0.995965
LamPP	200	-3.36667	0.984157
LamPP	201	-3.33333	0.974682
LamPP	202	-3.3	0.977495
LamPP	203	-3.26667	1.00267
LamPP	204	-3.23333	1.00248
LamPP	205	-3.2	0.982306
LamPP	206	-3.16667	0.977495
LamPP	207	-3.13333	0.974534
LamPP	208	-3.1	0.968019
LamPP	209	-3.06667	1.00485
LamPP	210	-3.03333	1.01103
LamPP	211	-3	0.999778
LamPP	212	-2.96667	0.979938
LamPP	213	-2.93333	0.981048
LamPP	214	-2.9	0.973941
LamPP	215	-2.86667	0.976236
LamPP	216	-2.83333	1.00278
LamPP	217	-2.8	1.00885
LamPP	218	-2.76667	0.976533
LamPP	219	-2.73333	0.975422
LamPP	220	-2.7	0.972905
LamPP	221	-2.66667	0.970388
LamPP	222	-2.63333	0.999519
LamPP	223	-2.6	1.00896
LamPP	224	-2.56667	1.00411
LamPP	225	-2.53333	0.983639
LamPP	226	-2.5	0.982233
LamPP	227	-2.46667	0.970684
LamPP	228	-2.43333	0.979864
LamPP	229	-2.4	1.00041
LamPP	230	-2.36667	1.01784
LamPP	231	-2.33333	0.97979
LamPP	232	-2.3	0.972461
LamPP	233	-2.26667	0.973497
LamPP	234	-2.23333	0.968759
LamPP	235	-2.2	1.00596
LamPP	236	-2.16667	1.0097
LamPP	237	-2.13333	0.999519
LamPP	238	-2.1	0.978827
LamPP	239	-2.06667	0.972609
LamPP	240	-2.03333	0.966686
LamPP	241	-2	0.999519
LamPP	242	-1.96667	1.01284
LamPP	243	-1.93333	1.01473
LamPP	244	-1.9	0.986527
LamPP	245	-1.86667	0.975718
LamPP	246	-1.83333	0.975718
LamPP	247	-1.8	0.973349
LamPP	248	-1.76667	0.999222
LamPP	249	-1.73333	1.01462
LamPP	250	-1.7	0.999112
LamPP	251	-1.66667	0.982825
LamPP	252	-1.63333	0.982233
LamPP	253	-1.6	0.966834
LamPP	254	-1.56667	0.997594
LamPP	255	-1.53333	1.01295
LamPP	256	-1.5	1.01295
LamPP	257	-1.46667	0.994189
LamPP	258	-1.43333	0.977199
LamPP	259	-1.4	0.973053
LamPP	260	-1.36667	0.975422
LamPP	261	-1.33333	1.01481
LamPP	262	-1.3	1.01466
LamPP	263	-1.26667	0.994929
LamPP	264	-1.23333	0.976754
LamPP	265	-1.2	0.969796
LamPP	266	-1.16667	0.968463
LamPP	267	-1.13333	1.00311
LamPP	268	-1.1	1.0211
LamPP	269	-1.06667	1.02128
LamPP	270	-1.03333	0.986896
LamPP	271	-1	0.982677
LamPP	272	-0.966667	0.975126
LamPP	273	-0.933333	0.976014
LamPP	274	-0.9	1.0154
LamPP	275	-0.866667	1.02188
LamPP	276	-0.833333	0.994744
LamPP	277	-0.8	0.985342
LamPP	278	-0.766667	0.972609
LamPP	279	-0.733333	0.961652
LamPP	280	-0.7	1.00426
LamPP	281	-0.666667	1.01207
LamPP	282	-0.633333	1.00363
LamPP	283	-0.6	0.977421
LamPP	284	-0.566667	0.978087
LamPP	285	-0.533333	0.972609
LamPP	286	-0.5	0.979272
LamPP	287	-0.466667	1.01092
LamPP	288	-0.433333	1.02273
LamPP	289	-0.4	0.980678
LamPP	290	-0.366667	0.973645
LamPP	291	-0.333333	0.966242
LamPP	292	-0.3	0.96713
LamPP	293	-0.266667	1.00533
LamPP	294	-0.233333	1.01932
LamPP	295	-0.2	1.00973
LamPP	296	-0.166667	0.978087
LamPP	297	-0.133333	0.97942
LamPP	298	-0.1	0.975718
LamPP	299	-0.0666667	1.00019
LamPP	300	-0.0333333	1.0241
LamPP	301	0	1.01962
LamPP	302	0.0333333	0.982159
LamPP	303	0.0666667	0.977199
LamPP	304	0.1	0.977199
LamPP	305	0.133333	0.973053
LamPP	306	0.166667	0.977347
LamPP	307	0.2	1.01473
LamPP	308	0.233333	1.0134
LamPP	309	0.266667	0.990006
LamPP	310	0.3	0.975866
LamPP	311	0.333333	0.963873
LamPP	312	0.366667	0.969944
LamPP	313	0.4	0.971128
LamPP	314	0.433333	0.97705
LamPP	315	0.466667	0.981048
LamPP	316	0.5	0.988007
LamPP	317	0.533333	0.99082
LamPP	318	0.566667	1
LamPP	319	0.6	1.00089
LamPP	320	0.633333	0.99541
LamPP	321	0.666667	1.00015
LamPP	322	0.7	0.994966
LamPP	323	0.733333	0.996595
LamPP	324	0.766667	1.00044
LamPP	325	0.8	1.00311
LamPP	326	0.833333	0.997409
LamPP	327	0.866667	1.0037
LamPP	328	0.9	1.00015
LamPP	329	0.933333	1.00104
LamPP	330	0.966667	1.00163
LamPP	331	1	1.00341
LamPP	332	1.03333	1.00252
LamPP	333	1.06667	1.00429
LamPP	334	1.1	1.00237
LamPP	335	1.13333	1.00222
LamPP	336	1.16667	1.00962
LamPP	337	1.2	1.0114
LamPP	338	1.23333	1.00267
LamPP	339	1.26667	1.00415
LamPP	340	1.3	1.01007
LamPP	341	1.33333	1.01007
LamPP	342	1.36667	1.0074
LamPP	343	1.4	1.00178
LamPP	344	1.43333	1.00089
LamPP	345	1.46667	1.0114
LamPP	346	1.5	1.00592
LamPP	347	1.53333	1.00962
LamPP	348	1.56667	1.008
LamPP	349	1.6	1.008
LamPP	350	1.63333	1.00548
LamPP	351	1.66667	1.00059
LamPP	352	1.7	0.997927
LamPP	353	1.73333	1.00237
LamPP	354	1.76667	1.00237
LamPP	355	1.8	1.00326
LamPP	356	1.83333	1.00318
LamPP	357	1.86667	1.00185
LamPP	358	1.9	1.00696
LamPP	359	1.93333	1.00637
LamPP	360	1.96667	1.00311
LamPP	361	2	1.00118
LamPP	362	2.03333	1.0003
LamPP	363	2.06667	1.00089
LamPP	364	2.1	0.999112
LamPP	365	2.13333	1.0037
LamPP	366	2.16667	1.00252
LamPP	367	2.2	1.00222
LamPP	368	2.23333	1.00341
LamPP	369	2.26667	1.00429
LamPP	370	2.3	1.00429
LamPP	371	2.33333	1.00296
LamPP	372	2.36667	1.00429
LamPP	373	2.4	1.00237
LamPP	374	2.43333	1.00118
LamPP	375	2.46667	0.994225
LamPP	376	2.5	0.997335
LamPP	377	2.53333	0.999408
LamPP	378	2.56667	0.999408
LamPP	379	2.6	1.0003
LamPP	380	2.63333	1.0003
LamPP	381	2.66667	1.0003
LamPP	382	2.7	0.999704
LamPP	383	2.73333	1.00118
LamPP	384	2.76667	1.00089
LamPP	385	2.8	1.00148
LamPP	386	2.83333	1.00267
LamPP	387	2.86667	1.00711
LamPP	388	2.9	1.00711
LamPP	389	2.93333	1.00311
LamPP	390	2.96667	1.00355
LamPP	391	3	1.00459
LamPP	392	3.03333	1.004
LamPP	393	3.06667	1.00311
LamPP	394	3.1	1.00222
LamPP	395	3.13333	1.00533
LamPP	396	3.16667	1.00533
LamPP	397	3.2	1.00385
LamPP	398	3.23333	1.00385
LamPP	399	3.26667	1.00563
LamPP	400	3.3	1.00607
LamPP	401	3.33333	1.00459
LamPP	402	3.36667	1.01214
LamPP	403	3.4	1.01125
LamPP	404	3.43333	1.00281
LamPP	405	3.46667	1.00252
LamPP	406	3.5	1.00503
LamPP	407	3.53333	1.00326
LamPP	408	3.56667	1.00415
LamPP	409	3.6	1.00577
LamPP	410	3.63333	1.00533
LamPP	411	3.66667	1.00267
LamPP	412	3.7	1.00533
LamPP	413	3.73333	1.0003
LamPP	414	3.76667	1.0077
LamPP	415	3.8	0.999112
LamPP	416	3.83333	1.00592
LamPP	417	3.86667	1.01022
LamPP	418	3.9	1.01347
LamPP	419	3.93333	1.01022
LamPP	420	3.96667	1.01022
LamPP	421	4	1.00859
LamPP	422	4.03333	1.00859
LamPP	423	4.06667	1.00859
LamPP	424	4.1	1.00859
LamPP	425	4.13333	1.00977
LamPP	426	4.16667	1.0151
LamPP	427	4.2	1.01347
LamPP	428	4.23333	1.01347
LamPP	429	4.26667	1.01347
LamPP	430	4.3	1.01347
LamPP	431	4.33333	1.01214
LamPP	432	4.36667	1.01081
LamPP	433	4.4	1.01199
LamPP	434	4.43333	1.01421
LamPP	435	4.46667	1.01466
LamPP	436	4.5	1.01732
LamPP	437	4.53333	1.01244
LamPP	438	4.56667	1.01732
LamPP	439	4.6	1.00992
LamPP	440	4.63333	1.00903
LamPP	441	4.66667	1.01421
LamPP	442	4.7	1.01392
LamPP	443	4.73333	1.01392
LamPP	444	4.76667	1.01273
LamPP	445	4.8	1.01481
LamPP	446	4.83333	1.01318
LamPP	447	4.86667	1.01318
LamPP	448	4.9	1.01555
LamPP	449	4.93333	1.01866
LamPP	450	4.96667	1.01866
LamPP	451	5	1.01866
LamPP	452	5.03333	1.01777
LamPP	453	5.06667	1.01362
LamPP	454	5.1	1.01481
LamPP	455	5.13333	1.01851
LamPP	456	5.16667	1.01777
LamPP	457	5.2	1.01125
LamPP	458	5.23333	1.01347
LamPP	459	5.26667	1.01347
LamPP	460	5.3	1.01347
LamPP	461	5.33333	1.00814
LamPP	462	5.36667	1.00814
LamPP	463	5.4	1.00814
LamPP	464	5.43333	1.00814
LamPP	465	5.46667	1.00933
LamPP	466	5.5	1.01066
LamPP	467	5.53333	1.01555
LamPP	468	5.56667	1.008
LamPP	469	5.6	1.00933
LamPP	470	5.63333	1.00933
LamPP	471	5.66667	1.00992
LamPP	472	5.7	1.0117
LamPP	473	5.73333	1.0117
LamPP	474	5.76667	1.01051
LamPP	475	5.8	1.01673
LamPP	476	5.83333	1.01806
LamPP	477	5.86667	1.01081
LamPP	478	5.9	1.00844
LamPP	479	5.93333	1.0117
LamPP	480	5.96667	1.01229
LamPP	481	6	1.0114
LamPP	482	6.03333	1.008
LamPP	483	6.06667	1.00888
LamPP	484	6.1	1.008
LamPP	485	6.13333	1.01125
LamPP	486	6.16667	1.01184
LamPP	487	6.2	1.01007
LamPP	488	6.23333	1.0154
LamPP	489	6.26667	1.01718
LamPP	490	6.3	1.01718
LamPP	491	6.33333	1.01718
LamPP	492	6.36667	1.01125
LamPP	493	6.4	1.01125
LamPP	494	6.43333	1.01836
LamPP	495	6.46667	1.02236
LamPP	496	6.5	1.02102
LamPP	497	6.53333	1.00844
LamPP	498	6.56667	1.01614
LamPP	499	6.6	1.01643
LamPP	500	6.63333	1.01555
LamPP	501	6.66667	1.02132
LamPP	502	6.7	1.01954
LamPP	503	6.73333	1.01954
LamPP	504	6.76667	1.01954
LamPP	505	6.8	1.01999
LamPP	506	6.83333	1.02073
LamPP	507	6.86667	1.01984
LamPP	508	6.9	1.01984
LamPP	509	6.93333	1.02073
LamPP	510	6.96667	1.02132
LamPP	511	7	1.01673
LamPP	512	7.03333	1.01525
LamPP	513	7.06667	1.01288
LamPP	514	7.1	1.0111
LamPP	515	7.13333	1.01318
LamPP	516	7.16667	1.01088
LamPP	517	7.2	1.01088
LamPP	518	7.23333	1.01288
LamPP	519	7.26667	1.01288
LamPP	520	7.3	1.01273
LamPP	521	7.33333	1.01155
LamPP	522	7.36667	1.01155
LamPP	523	7.4	1.00888
LamPP	524	7.43333	1.00962
LamPP	525	7.46667	1.01051
LamPP	526	7.5	1.0114
LamPP	527	7.53333	1.00829
LamPP	528	7.56667	1.00829
LamPP	529	7.6	1.00874
LamPP	530	7.63333	1.01007
LamPP	531	7.66667	1.01229
LamPP	532	7.7	1.01051
LamPP	533	7.73333	1.00881
LamPP	534	7.76667	1.01022
LamPP	535	7.8	1.01199
LamPP	536	7.83333	1.01096
LamPP	537	7.86667	1.01096
LamPP	538	7.9	1.01036
LamPP	539	7.93333	1.01051
LamPP	540	7.96667	1.0111
LamPP	541	8	1.01229
LamPP	542	8.03333	1.00563
LamPP	543	8.06667	1.00563
LamPP	544	8.1	1.00474
LamPP	545	8.13333	1.00474
LamPP	546	8.16667	1.00829
LamPP	547	8.2	1.0077
LamPP	548	8.23333	1.00814
LamPP	549	8.26667	1.01244
LamPP	550	8.3	1.01377
LamPP	551	8.33333	1.01407
LamPP	552	8.36667	1.0154
LamPP	553	8.4	1.0154
LamPP	554	8.43333	1.01407
LamPP	555	8.46667	1.01407
LamPP	556	8.5	1.01555
LamPP	557	8.53333	1.01866
LamPP	558	8.56667	1.01866
LamPP	559	8.6	1.01777
LamPP	560	8.63333	1.01666
LamPP	561	8.66667	1.02132
LamPP	562	8.7	1.02132
LamPP	563	8.73333	1.01429
LamPP	564	8.76667	1.0137
LamPP	565	8.8	1.0137
LamPP	566	8.83333	1.01547
LamPP	567	8.86667	1.01754
LamPP	568	8.9	1.01747
LamPP	569	8.93333	1.01488
LamPP	570	8.96667	1.01666
LamPP	571	9	1.01666
LamPP	572	9.03333	1.01666
LamPP	573	9.06667	1.01799
LamPP	574	9.1	1.01577
LamPP	575	9.13333	1.01399
LamPP	576	9.16667	1.01399
LamPP	577	9.2	1.01292
LamPP	578	9.23333	1.01366
LamPP	579	9.26667	1.01177
LamPP	580	9.3	1.01584
LamPP	581	9.33333	1.01547
LamPP	582	9.36667	1.01266
LamPP	583	9.4	1.02339
LamPP	584	9.43333	1.02428
LamPP	585	9.46667	1.02369
LamPP	586	9.5	1.02132
LamPP	587	9.53333	1.0201
LamPP	588	9.56667	1.0201
LamPP	589	9.6	1.0201
LamPP	590	9.63333	1.0201
LamPP	591	9.66667	1.0178
LamPP	592	9.7	1.02003
LamPP	593	9.73333	1.02321
LamPP	594	9.76667	1.02091
LamPP	595	9.8	1.01625
LamPP	596	9.83333	1.02206
LamPP	597	9.86667	1.02206
LamPP	598	9.9	1.02206
LamPP	599	9.93333	1.02413
LamPP	600	9.96667	1.02369
LamPP	601	10	1.02236
LamPP	602	10.0333	1.02369
LamPP	603	10.0667	1.02191
LamPP	604	10.1	1.0231
LamPP	605	10.1333	1.01192
LamPP	606	10.1667	1.0178
LamPP	607	10.2	1.01914
LamPP	608	10.2333	1.01647
LamPP	609	10.2667	1.01532
LamPP	610	10.3	1.01532
LamPP	611	10.3333	1.01103
LamPP	612	10.3667	1.01103
LamPP	613	10.4	1.02288
LamPP	614	10.4333	1.02554
LamPP	615	10.4667	1.01906
LamPP	616	10.5	1.02173
LamPP	617	10.5333	1.02173
LamPP	618	10.5667	1.01536
LamPP	619	10.6	1.01218
LamPP	620	10.6333	1.01706
LamPP	621	10.6667	1.01706
LamPP	622	10.7	1.01814
LamPP	623	10.7333	1.01695
LamPP	624	10.7667	1.01695
LamPP	625	10.8	1.01695
LamPP	626	10.8333	1.01695
LamPP	627	10.8667	1.01903
LamPP	628	10.9	1.01814
LamPP	629	10.9333	1.0168
LamPP	630	10.9667	1.01503
LamPP	631	11	1.02014
LamPP	632	11.0333	1.01954
LamPP	633	11.0667	1.01954
LamPP	634	11.1	1.01954
LamPP	635	11.1333	1.01407
LamPP	636	11.1667	1.01562
LamPP	637	11.2	1.01444
LamPP	638	11.2333	1.01754
LamPP	639	11.2667	1.01754
LamPP	640	11.3	1.01895
LamPP	641	11.3333	1.01895
LamPP	642	11.3667	1.01895
LamPP	643	11.4	1.01754
LamPP	644	11.4333	1.01895
LamPP	645	11.4667	1.02191
LamPP	646	11.5	1.01703
LamPP	647	11.5333	1.01954
LamPP	648	11.5667	1.01466
LamPP	649	11.6	1.01407
LamPP	650	11.6333	1.00918
LamPP	651	11.6667	1.00918
LamPP	652	11.7	1.00918
LamPP	653	11.7333	1.00918
LamPP	654	11.7667	1.00811
LamPP	655	11.8	1.00977
LamPP	656	11.8333	1.00918
LamPP	657	11.8667	1.01207
LamPP	658	11.9	1.01429
LamPP	659	11.9333	1.01488
LamPP	660	11.9667	1.00822
LamPP	661	12	1.00822
LamPP	662	12.0333	1.00822
LamPP	663	12.0667	1.00555
LamPP	664	12.1	1.00851
LamPP	665	12.1333	1.00851
LamPP	666	12.1667	1.00792
LamPP	667	12.2	1.00785
LamPP	668	12.2333	1.01518
LamPP	669	12.2667	1.00918
LamPP	670	12.3	1.01229
LamPP	671	12.3333	1.0134
LamPP	672	12.3667	1.01666
LamPP	673	12.4	1.01577
LamPP	674	12.4333	1.01725
LamPP	675	12.4667	1.01888
LamPP	676	12.5	1.0208
LamPP	677	12.5333	1.01051
LamPP	678	12.5667	1.0111
LamPP	679	12.6	1.0111
LamPP	680	12.6333	1.01229
LamPP	681	12.6667	1.01407
LamPP	682	12.7	1.0117
LamPP	683	12.7333	1.01288
LamPP	684	12.7667	1.0111
LamPP	685	12.8	1.00555
LamPP	686	12.8333	1.01044
LamPP	687	12.8667	1.01044
LamPP	688	12.9	1.01103
LamPP	689	12.9333	1.01044
LamPP	690	12.9667	1.00333
LamPP	691	13	1.00274
LamPP	692	13.0333	1.00274
LamPP	693	13.0667	1.00496
LamPP	694	13.1	1.00674
LamPP	695	13.1333	1.00896
LamPP	696	13.1667	1.00762
LamPP	697	13.2	1.00992
LamPP	698	13.2333	1.00762
LamPP	699	13.2667	1.01347
LamPP	700	13.3	1.01895
LamPP	701	13.3333	1.0154
LamPP	702	13.3667	1.01051
LamPP	703	13.4	1.00918
LamPP	704	13.4333	1.01451
LamPP	705	13.4667	1.01643
LamPP	706	13.5	1.01703
LamPP	707	13.5333	1.01266
LamPP	708	13.5667	1.01555
LamPP	709	13.6	1.01643
LamPP	710	13.6333	1.01503
LamPP	711	13.6667	1.0097
LamPP	712	13.7	1.00844
LamPP	713	13.7333	1.00666
LamPP	714	13.7667	1.00781
LamPP	715	13.8	1.00722
LamPP	716	13.8333	1.01899
LamPP	717	13.8667	1.00962
LamPP	718	13.9	1.01096
LamPP	719	13.9333	1.01184
LamPP	720	13.9667	1.01325
LamPP	721	14	1.01725
LamPP	722	14.0333	1.00674
LamPP	723	14.0667	0.988007
LamPP	724	14.1	0.972757
LamPP	725	14.1333	0.959283
LamPP	726	14.1667	0.96106
LamPP	727	14.2	0.968685
LamPP	728	14.2333	0.984009
LamPP	729	14.2667	1.00163
LamPP	730	14.3	1.0121
LamPP	731	14.3333	1.01477
LamPP	732	14.3667	1.01218
LamPP	733	14.4	1.0141
LamPP	734	14.4333	1.00603
LamPP	735	14.4667	1.02532
LamPP	736	14.5	1.01629
LamPP	737	14.5333	1.02132
LamPP	738	14.5667	1.02517
LamPP	739	14.6	1.03243
LamPP	740	14.6333	1.02946
LamPP	741	14.6667	1.02165
LamPP	742	14.7	1.02276
LamPP	743	14.7333	1.01392
LamPP	744	14.7667	1.01614
LamPP	745	14.8	1.01614
LamPP	746	14.8333	1.01595
LamPP	747	14.8667	1.01714
LamPP	748	14.9	1.01877
LamPP	749	14.9333	1.01251
LamPP	750	14.9667	1.01643
LamPP	751	15	1.02262
LamPP	752	15.0333	1.01799
LamPP	753	15.0667	1.01847
LamPP	754	15.1	1.01847
LamPP	755	15.1333	1.00925
LamPP	756	15.1667	1.0171
LamPP	757	15.2	1.0201
LamPP	758	15.2333	1.02325
LamPP	759	15.2667	1.0251
LamPP	760	15.3	1.0251
LamPP	761	15.3333	1.02813
LamPP	762	15.3667	1.02813
LamPP	763	15.4	1.02761
LamPP	764	15.4333	1.03028
LamPP	765	15.4667	1.02643
LamPP	766	15.5	1.02891
LamPP	767	15.5333	1.02565
LamPP	768	15.5667	1.02476
LamPP	769	15.6	1.02476
LamPP	770	15.6333	1.02624
LamPP	771	15.6667	1.02343
LamPP	772	15.7	1.01854
LamPP	773	15.7333	1.01854
LamPP	774	15.7667	1.01854
LamPP	775	15.8	1.01854
LamPP	776	15.8333	1.02343
LamPP	777	15.8667	1.02321
LamPP	778	15.9	1.02106
LamPP	779	15.9333	1.02047
LamPP	780	15.9667	1.02136
LamPP	781	16	1.01499
LamPP	782	16.0333	1.0141
LamPP	783	16.0667	1.01736
LamPP	784	16.1	1.01729
LamPP	785	16.1333	1.01444
LamPP	786	16.1667	1.01444
LamPP	787	16.2	1.01684
LamPP	788	16.2333	1.01773
LamPP	789	16.2667	1.01906
LamPP	790	16.3	1.01906
LamPP	791	16.3333	1.0204
LamPP	792	16.3667	1.01736
LamPP	793	16.4	1.0154
LamPP	794	16.4333	1.01344
LamPP	795	16.4667	1.01521
LamPP	796	16.5	1.01906
LamPP	797	16.5333	1.01566
LamPP	798	16.5667	1.02528
LamPP	799	16.6	1.02528
LamPP	800	16.6333	1.02469
LamPP	801	16.6667	1.02469
LamPP	802	16.7	1.02469
LamPP	803	16.7333	1.0238
LamPP	804	16.7667	1.02499
LamPP	805	16.8	1.02143
LamPP	806	16.8333	1.01921
LamPP	807	16.8667	1.01766
LamPP	808	16.9	1.01351
LamPP	809	16.9333	1.01233
LamPP	810	16.9667	1.01351
LamPP	811	17	1.01173
LamPP	812	17.0333	1.01603
LamPP	813	17.0667	1.01603
LamPP	814	17.1	1.01603
LamPP	815	17.1333	1.0181
LamPP	816	17.1667	1.01988
LamPP	817	17.2	1.01381
LamPP	818	17.2333	1.01588
LamPP	819	17.2667	1.01651
LamPP	820	17.3	1.0111
LamPP	821	17.3333	1.0151
LamPP	822	17.3667	0.989488
LamPP	823	17.4	0.954989
LamPP	824	17.4333	0.961504
LamPP	825	17.4667	0.953435
LamPP	826	17.5	0.963429
LamPP	827	17.5333	0.992005
LamPP	828	17.5667	0.988747
LamPP	829	17.6	0.995558
LamPP	830	17.6333	1.00178
LamPP	831	17.6667	1.0074
LamPP	832	17.7	1.00577
LamPP	833	17.7333	1.00948
LamPP	834	17.7667	1.01007
LamPP	835	17.8	1.01162
LamPP	836	17.8333	1.01221
LamPP	837	17.8667	1.01096
LamPP	838	17.9	1.01096
LamPP	839	17.9333	1.01947
LamPP	840	17.9667	1.01888
LamPP	841	18	1.01977
LamPP	842	18.0333	1.01917
LamPP	843	18.0667	1.0235
LamPP	844	18.1	1.0235
LamPP	845	18.1333	1.01843
LamPP	846	18.1667	1.01977
LamPP	847	18.2	1.01754
LamPP	848	18.2333	1.02154
LamPP	849	18.2667	1.02332
LamPP	850	18.3	1.02587
LamPP	851	18.3333	1.01758
LamPP	852	18.3667	1.02128
LamPP	853	18.4	1.02128
LamPP	854	18.4333	1.02128
LamPP	855	18.4667	1.02128
LamPP	856	18.5	1.02217
LamPP	857	18.5333	1.02306
LamPP	858	18.5667	1.02128
LamPP	859	18.6	1.02158
LamPP	860	18.6333	1.0127
LamPP	861	18.6667	1.0204
LamPP	862	18.7	1.0168
LamPP	863	18.7333	1.0168
LamPP	864	18.7667	1.0174
LamPP	865	18.8	1.00985
LamPP	866	18.8333	1.01525
LamPP	867	18.8667	1.01584
LamPP	868	18.9	1.01584
LamPP	869	18.9333	1.01762
LamPP	870	18.9667	1.01584
LamPP	871	19	1.01495
LamPP	872	19.0333	1.01214
LamPP	873	19.0667	1.01555
LamPP	874	19.1	1.01036
LamPP	875	19.1333	1.01036
LamPP	876	19.1667	1.02102
LamPP	877	19.2	1.01625
LamPP	878	19.2333	1.02021
LamPP	879	19.2667	1.01762
LamPP	880	19.3	1.01762
LamPP	881	19.3333	1.02251
LamPP	882	19.3667	1.02547
LamPP	883	19.4	1.02547
LamPP	884	19.4333	1.01718
LamPP	885	19.4667	1.01532
LamPP	886	19.5	1.01599
LamPP	887	19.5333	1.00392
LamPP	888	19.5667	0.982233
LamPP	889	19.6	0.967205
LamPP	890	19.6333	0.972017
LamPP	891	19.6667	0.96069
LamPP	892	19.7	0.973275
LamPP	893	19.7333	0.983713
LamPP	894	19.7667	0.994744
LamPP	895	19.8	0.999186
LamPP	896	19.8333	1.004
LamPP	897	19.8667	1.00074
LamPP	898	19.9	1.00133
LamPP	899	19.9333	1.00544
LamPP	900	19.9667	1.00811
LamPP	901	20	1.00766
LamPP	902	20.0333	1.00178
LamPP	903	20.0667	1.00207
LamPP	904	20.1	1.00207
LamPP	905	20.1333	1.00474
LamPP	906	20.1667	1.01125
LamPP	907	20.2	1.01259
LamPP	908	20.2333	1.00948
LamPP	909	20.2667	1.01081
LamPP	910	20.3	1.01421
LamPP	911	20.3333	1.01481
LamPP	912	20.3667	1.01088
LamPP	913	20.4	1.00985
LamPP	914	20.4333	1.0191

## Sheet: D
Line	Time (ms)	X	Y
LamPP	500	-9.5	0.714286
LamPP	600	-9.4	0.714286
LamPP	700	-9.3	0.714286
LamPP	800	-9.2	0.714286
LamPP	900	-9.1	0.952381
LamPP	1000	-9	0.952381
LamPP	1100	-8.9	1.19048
LamPP	1200	-8.8	0.952381
LamPP	1300	-8.7	1.19048
LamPP	1400	-8.6	0.952381
LamPP	1500	-8.5	1.19048
LamPP	1600	-8.4	0.952381
LamPP	1700	-8.3	0.952381
LamPP	1800	-8.2	1.19048
LamPP	1900	-8.1	0.952381
LamPP	2000	-8	1.19048
LamPP	2100	-7.9	0.952381
LamPP	2200	-7.8	1.19048
LamPP	2300	-7.7	0.952381
LamPP	2400	-7.6	1.19048
LamPP	2500	-7.5	0.952381
LamPP	2600	-7.4	0.952381
LamPP	2700	-7.3	1.19048
LamPP	2800	-7.2	0.952381
LamPP	2900	-7.1	1.19048
LamPP	3000	-7	0.952381
LamPP	3100	-6.9	1.19048
LamPP	3200	-6.8	0.952381
LamPP	3300	-6.7	1.19048
LamPP	3400	-6.6	0.952381
LamPP	3500	-6.5	0.952381
LamPP	3600	-6.4	1.19048
LamPP	3700	-6.3	0.952381
LamPP	3800	-6.2	1.19048
LamPP	3900	-6.1	0.952381
LamPP	4000	-6	1.19048
LamPP	4100	-5.9	0.952381
LamPP	4200	-5.8	0.952381
LamPP	4300	-5.7	0.952381
LamPP	4400	-5.6	0.952381
LamPP	4500	-5.5	1.19048
LamPP	4600	-5.4	0.952381
LamPP	4700	-5.3	1.19048
LamPP	4800	-5.2	0.952381
LamPP	4900	-5.1	1.19048
LamPP	5000	-5	0.952381
LamPP	5100	-4.9	0.952381
LamPP	5200	-4.8	1.19048
LamPP	5300	-4.7	0.952381
LamPP	5400	-4.6	1.19048
LamPP	5500	-4.5	0.952381
LamPP	5600	-4.4	1.19048
LamPP	5700	-4.3	0.952381
LamPP	5800	-4.2	1.19048
LamPP	5900	-4.1	0.952381
LamPP	6000	-4	0.952381
LamPP	6100	-3.9	1.19048
LamPP	6200	-3.8	0.952381
LamPP	6300	-3.7	1.19048
LamPP	6400	-3.6	0.952381
LamPP	6500	-3.5	1.19048
LamPP	6600	-3.4	0.952381
LamPP	6700	-3.3	1.19048
LamPP	6800	-3.2	0.952381
LamPP	6900	-3.1	0.952381
LamPP	7000	-3	1.19048
LamPP	7100	-2.9	0.952381
LamPP	7200	-2.8	1.19048
LamPP	7300	-2.7	0.952381
LamPP	7400	-2.6	0.952381
LamPP	7500	-2.5	0.952381
LamPP	7600	-2.4	0.952381
LamPP	7700	-2.3	0.952381
LamPP	7800	-2.2	0.952381
LamPP	7900	-2.1	1.19048
LamPP	8000	-2	0.952381
LamPP	8100	-1.9	1.19048
LamPP	8200	-1.8	0.952381
LamPP	8300	-1.7	0.952381
LamPP	8400	-1.6	1.19048
LamPP	8500	-1.5	0.952381
LamPP	8600	-1.4	0.952381
LamPP	8700	-1.3	0.952381
LamPP	8800	-1.2	0.952381
LamPP	8900	-1.1	0.952381
LamPP	9000	-1	0.952381
LamPP	9100	-0.9	0.714286
LamPP	9200	-0.8	0.952381
LamPP	9300	-0.7	0.952381
LamPP	9400	-0.6	0.952381
LamPP	9500	-0.5	0.952381
LamPP	9600	-0.4	0.952381
LamPP	9700	-0.3	0.714286
LamPP	9800	-0.2	0.714286
LamPP	9900	-0.1	0.47619
LamPP	10000	0	0.47619
LamPP	10100	0.1	0.47619
LamPP	10200	0.2	0.238095
LamPP	10300	0.3	0.238095
LamPP	10400	0.4	0
LamPP	10500	0.5	0
LamPP	10600	0.6	0
LamPP	10700	0.7	0
LamPP	10800	0.8	0
LamPP	10900	0.9	0
LamPP	11000	1	0
LamPP	11100	1.1	0
LamPP	11200	1.2	0
LamPP	11300	1.3	0
LamPP	11400	1.4	0
LamPP	11500	1.5	0
LamPP	11600	1.6	0
LamPP	11700	1.7	0
LamPP	11800	1.8	0
LamPP	11900	1.9	0
LamPP	12000	2	0
LamPP	12100	2.1	0
LamPP	12200	2.2	0
LamPP	12300	2.3	0
LamPP	12400	2.4	0
LamPP	12500	2.5	0
LamPP	12600	2.6	0
LamPP	12700	2.7	0
LamPP	12800	2.8	0
LamPP	12900	2.9	0
LamPP	13000	3	0
LamPP	13100	3.1	0
LamPP	13200	3.2	0
LamPP	13300	3.3	0
LamPP	13400	3.4	0
LamPP	13500	3.5	0
LamPP	13600	3.6	0
LamPP	13700	3.7	0
LamPP	13800	3.8	0
LamPP	13900	3.9	0
LamPP	14000	4	0
LamPP	14100	4.1	0
LamPP	14200	4.2	0
LamPP	14300	4.3	0
LamPP	14400	4.4	0
LamPP	14500	4.5	0
LamPP	14600	4.6	0
LamPP	14700	4.7	0.238095
LamPP	14800	4.8	0.238095
LamPP	14900	4.9	0.238095
LamPP	15000	5	0.47619
LamPP	15100	5.1	0.47619
LamPP	15200	5.2	0.47619
LamPP	15300	5.3	0.714286
LamPP	15400	5.4	0.714286
LamPP	15500	5.5	0.714286
LamPP	15600	5.6	0.952381
LamPP	15700	5.7	0.714286
LamPP	15800	5.8	0.952381
LamPP	15900	5.9	0.952381
LamPP	16000	6	0.952381
LamPP	16100	6.1	0.952381
LamPP	16200	6.2	0.952381
LamPP	16300	6.3	0.952381
LamPP	16400	6.4	0.952381
LamPP	16500	6.5	1.19048
LamPP	16600	6.6	0.952381
LamPP	16700	6.7	1.19048
LamPP	16800	6.8	0.952381
LamPP	16900	6.9	0.952381
LamPP	17000	7	0.952381
LamPP	17100	7.1	0.952381
LamPP	17200	7.2	1.19048
LamPP	17300	7.3	0.952381
LamPP	17400	7.4	1.19048
LamPP	17500	7.5	0.952381
LamPP	17600	7.6	1.19048
LamPP	17700	7.7	0.952381
LamPP	17800	7.8	0.952381
LamPP	17900	7.9	1.19048
LamPP	18000	8	0.952381
LamPP	18100	8.1	1.19048
LamPP	18200	8.2	0.952381
LamPP	18300	8.3	1.19048
LamPP	18400	8.4	0.952381
LamPP	18500	8.5	0.952381
LamPP	18600	8.6	0.952381
LamPP	18700	8.7	0.952381
LamPP	18800	8.8	1.19048
LamPP	18900	8.9	0.952381
LamPP	19000	9	1.19048
LamPP	19100	9.1	0.952381
LamPP	19200	9.2	0.952381
LamPP	19300	9.3	0.952381
LamPP	19400	9.4	0.952381
LamPP	19500	9.5	1.19048
LamPP	19600	9.6	0.952381
LamPP	19700	9.7	1.19048
LamPP	19800	9.8	0.952381
LamPP	19900	9.9	1.19048
LamPP	20000	10	0.952381
LamPP	20100	10.1	0.952381
LamPP	20200	10.2	1.19048
LamPP	20300	10.3	0.952381
LamPP	20400	10.4	1.19048
LamPP	20500	10.5	0.952381
LamPP	20600	10.6	1.19048
LamPP	20700	10.7	0.952381
LamPP	20800	10.8	0.952381
LamPP	20900	10.9	0.952381
LamPP	21000	11	0.952381
LamPP	21100	11.1	1.19048
LamPP	21200	11.2	0.952381
LamPP	21300	11.3	1.19048
LamPP	21400	11.4	0.952381
LamPP	21500	11.5	1.19048
LamPP	21600	11.6	0.952381
LamPP	21700	11.7	0.952381
LamPP	21800	11.8	1.19048
LamPP	21900	11.9	0.952381
LamPP	22000	12	1.19048
LamPP	22100	12.1	0.952381
LamPP	22200	12.2	1.19048
LamPP	22300	12.3	0.952381
LamPP	22400	12.4	1.19048
LamPP	22500	12.5	0.952381
LamPP	22600	12.6	0.952381
LamPP	22700	12.7	1.19048
LamPP	22800	12.8	0.952381
LamPP	22900	12.9	1.19048
LamPP	23000	13	0.952381
LamPP	23100	13.1	1.19048
LamPP	23200	13.2	0.952381
LamPP	23300	13.3	1.19048
LamPP	23400	13.4	0.952381
LamPP	23500	13.5	0.952381
LamPP	23600	13.6	1.19048
LamPP	23700	13.7	0.952381
LamPP	23800	13.8	1.19048
LamPP	23900	13.9	0.952381
LamPP	24000	14	1.19048
LamPP	24100	14.1	0.952381
LamPP	24200	14.2	1.19048
LamPP	24300	14.3	0.952381
LamPP	24400	14.4	0.952381
LamPP	24500	14.5	1.19048
LamPP	24600	14.6	0.952381
LamPP	24700	14.7	1.19048
LamPP	24800	14.8	0.952381
LamPP	24900	14.9	1.19048
LamPP	25000	15	0.952381
LamPP	25100	15.1	1.19048
LamPP	25200	15.2	0.952381
LamPP	25300	15.3	0.952381
LamPP	25400	15.4	1.19048
LamPP	25500	15.5	0.952381
LamPP	25600	15.6	1.19048
LamPP	25700	15.7	0.952381
LamPP	25800	15.8	1.19048
LamPP	25900	15.9	0.952381
LamPP	26000	16	1.19048
LamPP	26100	16.1	0.952381
LamPP	26200	16.2	0.952381
LamPP	26300	16.3	1.19048
LamPP	26400	16.4	0.952381
LamPP	26500	16.5	1.19048
LamPP	26600	16.6	0.952381
LamPP	26700	16.7	1.19048
LamPP	26800	16.8	0.952381
LamPP	26900	16.9	1.19048
LamPP	27000	17	0.952381
LamPP	27100	17.1	0.952381
LamPP	27200	17.2	1.19048
LamPP	27300	17.3	0.952381
LamPP	27400	17.4	1.19048
LamPP	27500	17.5	0.952381
LamPP	27600	17.6	1.19048
LamPP	27700	17.7	0.952381
LamPP	27800	17.8	1.19048
LamPP	27900	17.9	0.952381
LamPP	28000	18	0.952381
LamPP	28100	18.1	1.19048
LamPP	28200	18.2	0.952381
LamPP	28300	18.3	1.19048
LamPP	28400	18.4	0.952381
LamPP	28500	18.5	1.19048
LamPP	28600	18.6	0.952381
LamPP	28700	18.7	1.19048
LamPP	28800	18.8	0.952381
LamPP	28900	18.9	0.952381
LamPP	29000	19	1.19048
LamPP	29100	19.1	0.952381
LamPP	29200	19.2	1.19048
LamPP	29300	19.3	0.952381
LamPP	29400	19.4	1.19048
LamPP	29500	19.5	0.952381
LamPP	29600	19.6	1.19048
LamPP	29700	19.7	0.952381
LamPP	29800	19.8	0.952381
LamPP	29900	19.9	1.19048
LamPP	30000	20	0.952381
LamPP	30100	20.1	1.19048
LamPP	30200	20.2	0.952381
LamPP	30300	20.3	1.19048
LamPP	30400	20.4	0.952381
LamPP	30500	20.5	0.952381
LamPP	30600	20.6	0.952381
LamPP	30700	20.7	0.952381
LamPP	30800	20.8	1.19048
LamPP	30900	20.9	0.952381
LamPP	31000	21	1.19048
LamPP	31100	21.1	0.952381
LamPP	31200	21.2	1.19048
LamPP	31300	21.3	0.952381
LamPP	31400	21.4	0.952381
LamPP	31500	21.5	1.19048
LamPP	31600	21.6	0.952381
LamPP	31700	21.7	1.19048
LamPP	31800	21.8	0.952381
LamPP	31900	21.9	1.19048
LamPP	32000	22	0.952381
LamPP	32100	22.1	1.19048
LamPP	32200	22.2	0.952381
LamPP	32300	22.3	0.952381
LamPP	32400	22.4	1.19048
LamPP	32500	22.5	0.952381
LamPP	32600	22.6	1.19048
LamPP	32700	22.7	0.952381
LamPP	32800	22.8	1.19048
LamPP	32900	22.9	0.952381
LamPP	33000	23	1.19048
LamPP	33100	23.1	0.952381
LamPP	33200	23.2	0.952381
LamPP	33300	23.3	1.19048
LamPP	33400	23.4	0.952381
LamPP	33500	23.5	1.19048
LamPP	33600	23.6	0.952381
LamPP	33700	23.7	1.19048
LamPP	33800	23.8	0.952381
LamPP	33900	23.9	1.19048
LamPP	34000	24	0.952381
LamPP	34100	24.1	0.952381
LamPP	34200	24.2	1.19048
LamPP	34300	24.3	0.952381
LamPP	34400	24.4	1.19048
LamPP	34500	24.5	0.952381
LamPP	34600	24.6	1.19048
LamPP	34700	24.7	0.952381
LamPP	34800	24.8	1.19048
LamPP	34900	24.9	0.952381
LamPP	35000	25	0.952381
LamPP	35100	25.1	1.19048
LamPP	35200	25.2	0.952381
LamPP	35300	25.3	1.19048
LamPP	35400	25.4	0.952381
LamPP	35500	25.5	1.19048
LamPP	35600	25.6	0.952381
LamPP	35700	25.7	1.19048
LamPP	35800	25.8	0.952381
LamPP	35900	25.9	0.952381
LamPP	36000	26	1.19048
LamPP	36100	26.1	0.952381
LamPP	36200	26.2	1.19048
LamPP	36300	26.3	0.952381
LamPP	36400	26.4	1.19048
LamPP	36500	26.5	0.952381
LamPP	36600	26.6	0.952381
LamPP	36700	26.7	0.952381
LamPP	36800	26.8	0.952381
LamPP	36900	26.9	1.19048
LamPP	37000	27	0.952381
LamPP	37100	27.1	1.19048
LamPP	37200	27.2	0.952381
LamPP	37300	27.3	1.19048
LamPP	37400	27.4	0.952381
LamPP	37500	27.5	0.952381
LamPP	37600	27.6	1.19048
LamPP	37700	27.7	0.952381
LamPP	37800	27.8	1.19048
LamPP	37900	27.9	0.952381
LamPP	38000	28	1.19048
LamPP	38100	28.1	0.952381
LamPP	38200	28.2	1.19048
LamPP	38300	28.3	0.952381
LamPP	38400	28.4	0.952381
LamPP	38500	28.5	1.19048
LamPP	38600	28.6	0.952381
LamPP	38700	28.7	1.19048
LamPP	38800	28.8	0.952381
LamPP	38900	28.9	1.19048
LamPP	39000	29	0.952381
LamPP	39100	29.1	1.19048
LamPP	39200	29.2	0.952381
LamPP	39300	29.3	0.952381
LamPP	39400	29.4	1.19048
LamPP	39500	29.5	0.952381
LamPP	39600	29.6	1.19048
LamPP	39700	29.7	0.952381
LamPP	39800	29.8	1.19048
LamPP	39900	29.9	0.952381
LamPP	40000	30	1.19048
LamPP	40100	30.1	0.952381
LamPP	40200	30.2	0.952381
LamPP	40300	30.3	1.19048
LamPP	40400	30.4	0.952381
LamPP	40500	30.5	1.19048
LamPP	40600	30.6	0.952381
LamPP	40700	30.7	1.19048
LamPP	40800	30.8	0.952381
LamPP	40900	30.9	1.19048
LamPP	41000	31	0.952381
LamPP	41100	31.1	0.952381
LamPP	41200	31.2	1.19048
LamPP	41300	31.3	0.952381
LamPP	41400	31.4	1.19048
LamPP	41500	31.5	0.952381
LamPP	41600	31.6	1.19048
LamPP	41700	31.7	0.952381
LamPP	41800	31.8	1.19048
LamPP	41900	31.9	0.952381
LamPP	42000	32	0.952381
LamPP	42100	32.1	1.19048
LamPP	42200	32.2	0.952381
LamPP	42300	32.3	1.19048
LamPP	42400	32.4	0.952381
LamPP	42500	32.5	1.19048
LamPP	42600	32.6	0.952381
LamPP	42700	32.7	0.952381
LamPP	42800	32.8	0.952381
LamPP	42900	32.9	0.952381
LamPP	43000	33	1.19048
LamPP	43100	33.1	0.952381
LamPP	43200	33.2	1.19048
LamPP	43300	33.3	0.952381
LamPP	43400	33.4	1.19048
LamPP	43500	33.5	0.952381
LamPP	43600	33.6	0.952381
LamPP	43700	33.7	1.19048
LamPP	43800	33.8	0.952381
LamPP	43900	33.9	1.19048
LamPP	44000	34	0.952381
LamPP	44100	34.1	1.19048
LamPP	44200	34.2	0.952381
LamPP	44300	34.3	1.19048
LamPP	44400	34.4	0.952381
LamPP	44500	34.5	0.952381
LamPP	500	-9.5	1.02564
LamPP	600	-9.4	0.769231
LamPP	700	-9.3	1.02564
LamPP	800	-9.2	1.02564
LamPP	900	-9.1	1.02564
LamPP	1000	-9	1.02564
LamPP	1100	-8.9	1.02564
LamPP	1200	-8.8	1.02564
LamPP	1300	-8.7	1.02564
LamPP	1400	-8.6	1.02564
LamPP	1500	-8.5	1.02564
LamPP	1600	-8.4	1.02564
LamPP	1700	-8.3	1.02564
LamPP	1800	-8.2	1.02564
LamPP	1900	-8.1	1.02564
LamPP	2000	-8	1.02564
LamPP	2100	-7.9	1.02564
LamPP	2200	-7.8	1.02564
LamPP	2300	-7.7	1.02564
LamPP	2400	-7.6	1.02564
LamPP	2500	-7.5	1.02564
LamPP	2600	-7.4	1.02564
LamPP	2700	-7.3	0.769231
LamPP	2800	-7.2	1.02564
LamPP	2900	-7.1	1.02564
LamPP	3000	-7	1.02564
LamPP	3100	-6.9	1.02564
LamPP	3200	-6.8	0.769231
LamPP	3300	-6.7	1.02564
LamPP	3400	-6.6	1.02564
LamPP	3500	-6.5	1.02564
LamPP	3600	-6.4	1.02564
LamPP	3700	-6.3	1.02564
LamPP	3800	-6.2	1.02564
LamPP	3900	-6.1	1.02564
LamPP	4000	-6	1.02564
LamPP	4100	-5.9	1.02564
LamPP	4200	-5.8	1.02564
LamPP	4300	-5.7	1.02564
LamPP	4400	-5.6	1.02564
LamPP	4500	-5.5	0.769231
LamPP	4600	-5.4	1.02564
LamPP	4700	-5.3	1.02564
LamPP	4800	-5.2	1.02564
LamPP	4900	-5.1	1.02564
LamPP	5000	-5	0.769231
LamPP	5100	-4.9	1.02564
LamPP	5200	-4.8	1.02564
LamPP	5300	-4.7	1.02564
LamPP	5400	-4.6	1.02564
LamPP	5500	-4.5	1.02564
LamPP	5600	-4.4	1.02564
LamPP	5700	-4.3	1.02564
LamPP	5800	-4.2	1.02564
LamPP	5900	-4.1	1.02564
LamPP	6000	-4	1.02564
LamPP	6100	-3.9	1.02564
LamPP	6200	-3.8	1.02564
LamPP	6300	-3.7	1.02564
LamPP	6400	-3.6	1.02564
LamPP	6500	-3.5	1.02564
LamPP	6600	-3.4	1.02564
LamPP	6700	-3.3	1.02564
LamPP	6800	-3.2	0.769231
LamPP	6900	-3.1	1.02564
LamPP	7000	-3	1.02564
LamPP	7100	-2.9	1.02564
LamPP	7200	-2.8	1.02564
LamPP	7300	-2.7	0.769231
LamPP	7400	-2.6	1.02564
LamPP	7500	-2.5	1.02564
LamPP	7600	-2.4	1.02564
LamPP	7700	-2.3	1.02564
LamPP	7800	-2.2	1.02564
LamPP	7900	-2.1	1.02564
LamPP	8000	-2	1.02564
LamPP	8100	-1.9	1.02564
LamPP	8200	-1.8	1.02564
LamPP	8300	-1.7	1.02564
LamPP	8400	-1.6	1.02564
LamPP	8500	-1.5	1.02564
LamPP	8600	-1.4	0.769231
LamPP	8700	-1.3	1.02564
LamPP	8800	-1.2	1.02564
LamPP	8900	-1.1	1.02564
LamPP	9000	-1	1.02564
LamPP	9100	-0.9	0.769231
LamPP	9200	-0.8	1.02564
LamPP	9300	-0.7	1.02564
LamPP	9400	-0.6	1.02564
LamPP	9500	-0.5	1.02564
LamPP	9600	-0.4	1.02564
LamPP	9700	-0.3	1.02564
LamPP	9800	-0.2	1.02564
LamPP	9900	-0.1	0.769231
LamPP	10000	0	1.02564
LamPP	10100	0.1	1.02564
LamPP	10200	0.2	0.769231
LamPP	10300	0.3	0.769231
LamPP	10400	0.4	0.512821
LamPP	10500	0.5	0.512821
LamPP	10600	0.6	0.512821
LamPP	10700	0.7	0.25641
LamPP	10800	0.8	0.25641
LamPP	10900	0.9	0.25641
LamPP	11000	1	0
LamPP	11100	1.1	0
LamPP	11200	1.2	0
LamPP	11300	1.3	0
LamPP	11400	1.4	0
LamPP	11500	1.5	0
LamPP	11600	1.6	0
LamPP	11700	1.7	0
LamPP	11800	1.8	0
LamPP	11900	1.9	0
LamPP	12000	2	0
LamPP	12100	2.1	0
LamPP	12200	2.2	0
LamPP	12300	2.3	0
LamPP	12400	2.4	0
LamPP	12500	2.5	0
LamPP	12600	2.6	0
LamPP	12700	2.7	0
LamPP	12800	2.8	0
LamPP	12900	2.9	0
LamPP	13000	3	0
LamPP	13100	3.1	0
LamPP	13200	3.2	0
LamPP	13300	3.3	0
LamPP	13400	3.4	0
LamPP	13500	3.5	0
LamPP	13600	3.6	0
LamPP	13700	3.7	0
LamPP	13800	3.8	0
LamPP	13900	3.9	0
LamPP	14000	4	0
LamPP	14100	4.1	0
LamPP	14200	4.2	0
LamPP	14300	4.3	0
LamPP	14400	4.4	0
LamPP	14500	4.5	0
LamPP	14600	4.6	0
LamPP	14700	4.7	0
LamPP	14800	4.8	0.25641
LamPP	14900	4.9	0.25641
LamPP	15000	5	0.25641
LamPP	15100	5.1	0.25641
LamPP	15200	5.2	0.25641
LamPP	15300	5.3	0.25641
LamPP	15400	5.4	0.512821
LamPP	15500	5.5	0.512821
LamPP	15600	5.6	0.512821
LamPP	15700	5.7	0.769231
LamPP	15800	5.8	0.512821
LamPP	15900	5.9	0.769231
LamPP	16000	6	0.769231
LamPP	16100	6.1	0.769231
LamPP	16200	6.2	1.02564
LamPP	16300	6.3	1.02564
LamPP	16400	6.4	1.02564
LamPP	16500	6.5	1.02564
LamPP	16600	6.6	1.02564
LamPP	16700	6.7	1.02564
LamPP	16800	6.8	1.02564
LamPP	16900	6.9	1.02564
LamPP	17000	7	1.02564
LamPP	17100	7.1	1.02564
LamPP	17200	7.2	1.02564
LamPP	17300	7.3	1.02564
LamPP	17400	7.4	0.769231
LamPP	17500	7.5	1.02564
LamPP	17600	7.6	1.02564
LamPP	17700	7.7	1.02564
LamPP	17800	7.8	1.02564
LamPP	17900	7.9	0.769231
LamPP	18000	8	1.02564
LamPP	18100	8.1	1.02564
LamPP	18200	8.2	1.02564
LamPP	18300	8.3	1.02564
LamPP	18400	8.4	1.02564
LamPP	18500	8.5	1.02564
LamPP	18600	8.6	1.02564
LamPP	18700	8.7	1.02564
LamPP	18800	8.8	1.02564
LamPP	18900	8.9	1.02564
LamPP	19000	9	1.02564
LamPP	19100	9.1	1.02564
LamPP	19200	9.2	0.769231
LamPP	19300	9.3	1.02564
LamPP	19400	9.4	1.02564
LamPP	19500	9.5	1.02564
LamPP	19600	9.6	1.02564
LamPP	19700	9.7	1.02564
LamPP	19800	9.8	1.02564
LamPP	19900	9.9	1.28205
LamPP	20000	10	1.02564
LamPP	20100	10.1	1.02564
LamPP	20200	10.2	1.28205
LamPP	20300	10.3	1.02564
LamPP	20400	10.4	1.28205
LamPP	20500	10.5	1.02564
LamPP	20600	10.6	1.02564
LamPP	20700	10.7	1.02564
LamPP	20800	10.8	1.02564
LamPP	20900	10.9	1.02564
LamPP	21000	11	1.02564
LamPP	21100	11.1	1.02564
LamPP	21200	11.2	1.02564
LamPP	21300	11.3	1.02564
LamPP	21400	11.4	1.02564
LamPP	21500	11.5	1.02564
LamPP	21600	11.6	1.02564
LamPP	21700	11.7	1.02564
LamPP	21800	11.8	1.02564
LamPP	21900	11.9	1.02564
LamPP	22000	12	1.02564
LamPP	22100	12.1	1.02564
LamPP	22200	12.2	1.02564
LamPP	22300	12.3	1.02564
LamPP	22400	12.4	1.02564
LamPP	22500	12.5	1.02564
LamPP	22600	12.6	1.02564
LamPP	22700	12.7	1.02564
LamPP	22800	12.8	1.02564
LamPP	22900	12.9	1.02564
LamPP	23000	13	1.02564
LamPP	23100	13.1	1.28205
LamPP	23200	13.2	1.02564
LamPP	23300	13.3	1.02564
LamPP	23400	13.4	1.02564
LamPP	23500	13.5	1.02564
LamPP	23600	13.6	1.28205
LamPP	23700	13.7	1.02564
LamPP	23800	13.8	1.02564
LamPP	23900	13.9	1.02564
LamPP	24000	14	1.02564
LamPP	24100	14.1	1.02564
LamPP	24200	14.2	1.02564
LamPP	24300	14.3	1.28205
LamPP	24400	14.4	1.02564
LamPP	24500	14.5	1.02564
LamPP	24600	14.6	1.02564
LamPP	24700	14.7	1.02564
LamPP	24800	14.8	1.28205
LamPP	24900	14.9	1.02564
LamPP	25000	15	1.02564
LamPP	25100	15.1	1.02564
LamPP	25200	15.2	1.02564
LamPP	25300	15.3	1.02564
LamPP	25400	15.4	1.02564
LamPP	25500	15.5	1.02564
LamPP	25600	15.6	1.02564
LamPP	25700	15.7	1.02564
LamPP	25800	15.8	1.02564
LamPP	25900	15.9	1.02564
LamPP	26000	16	1.02564
LamPP	26100	16.1	1.02564
LamPP	26200	16.2	1.02564
LamPP	26300	16.3	1.02564
LamPP	26400	16.4	1.02564
LamPP	26500	16.5	1.28205
LamPP	26600	16.6	1.02564
LamPP	26700	16.7	1.02564
LamPP	26800	16.8	1.02564
LamPP	26900	16.9	1.02564
LamPP	27000	17	1.28205
LamPP	27100	17.1	1.02564
LamPP	27200	17.2	1.02564
LamPP	27300	17.3	1.02564
LamPP	27400	17.4	1.02564
LamPP	27500	17.5	1.02564
LamPP	27600	17.6	1.02564
LamPP	27700	17.7	1.02564
LamPP	27800	17.8	1.02564
LamPP	27900	17.9	1.02564
LamPP	28000	18	1.02564
LamPP	28100	18.1	1.02564
LamPP	28200	18.2	1.28205
LamPP	28300	18.3	1.02564
LamPP	28400	18.4	1.02564
LamPP	28500	18.5	1.02564
LamPP	28600	18.6	1.02564
LamPP	28700	18.7	1.28205
LamPP	28800	18.8	1.02564
LamPP	28900	18.9	1.02564
LamPP	29000	19	1.02564
LamPP	29100	19.1	1.02564
LamPP	29200	19.2	1.02564
LamPP	29300	19.3	1.02564
LamPP	29400	19.4	1.28205
LamPP	29500	19.5	1.02564
LamPP	29600	19.6	1.02564
LamPP	29700	19.7	1.02564
LamPP	29800	19.8	1.02564
LamPP	29900	19.9	1.28205
LamPP	30000	20	1.02564
LamPP	30100	20.1	1.28205
LamPP	30200	20.2	1.02564
LamPP	30300	20.3	1.02564
LamPP	30400	20.4	1.02564
LamPP	30500	20.5	1.02564
LamPP	30600	20.6	1.28205
LamPP	30700	20.7	1.02564
LamPP	30800	20.8	1.02564
LamPP	30900	20.9	1.02564
LamPP	31000	21	1.02564
LamPP	31100	21.1	1.02564
LamPP	31200	21.2	1.02564
LamPP	31300	21.3	1.02564
LamPP	31400	21.4	1.02564
LamPP	31500	21.5	1.02564
LamPP	31600	21.6	1.02564
LamPP	31700	21.7	1.02564
LamPP	31800	21.8	1.28205
LamPP	31900	21.9	1.02564
LamPP	32000	22	1.02564
LamPP	32100	22.1	1.02564
LamPP	32200	22.2	1.02564
LamPP	32300	22.3	1.28205
LamPP	32400	22.4	1.02564
LamPP	32500	22.5	1.02564
LamPP	32600	22.6	1.02564
LamPP	32700	22.7	1.02564
LamPP	32800	22.8	1.02564
LamPP	32900	22.9	1.02564
LamPP	33000	23	1.28205
LamPP	33100	23.1	1.02564
LamPP	33200	23.2	1.02564
LamPP	33300	23.3	1.02564
LamPP	33400	23.4	1.02564
LamPP	33500	23.5	1.28205
LamPP	33600	23.6	1.02564
LamPP	33700	23.7	1.02564
LamPP	33800	23.8	1.02564
LamPP	33900	23.9	1.02564
LamPP	34000	24	1.02564
LamPP	34100	24.1	1.02564
LamPP	34200	24.2	1.02564
LamPP	34300	24.3	1.02564
LamPP	34400	24.4	1.02564
LamPP	34500	24.5	1.02564
LamPP	34600	24.6	1.02564
LamPP	34700	24.7	1.28205
LamPP	34800	24.8	1.02564
LamPP	34900	24.9	1.02564
LamPP	35000	25	1.02564
LamPP	35100	25.1	1.02564
LamPP	35200	25.2	1.28205
LamPP	35300	25.3	1.02564
LamPP	35400	25.4	1.02564
LamPP	35500	25.5	1.02564
LamPP	35600	25.6	1.02564
LamPP	35700	25.7	1.02564
LamPP	35800	25.8	1.02564
LamPP	35900	25.9	1.28205
LamPP	36000	26	1.02564
LamPP	36100	26.1	1.02564
LamPP	36200	26.2	1.02564
LamPP	36300	26.3	1.02564
LamPP	36400	26.4	1.28205
LamPP	36500	26.5	1.02564
LamPP	36600	26.6	1.02564
LamPP	36700	26.7	1.02564
LamPP	36800	26.8	1.02564
LamPP	36900	26.9	1.02564
LamPP	37000	27	1.02564
LamPP	37100	27.1	1.28205
LamPP	37200	27.2	1.02564
LamPP	37300	27.3	1.02564
LamPP	37400	27.4	1.02564
LamPP	37500	27.5	1.02564
LamPP	37600	27.6	1.28205
LamPP	37700	27.7	1.02564
LamPP	37800	27.8	1.28205
LamPP	37900	27.9	1.02564
LamPP	38000	28	1.02564
LamPP	38100	28.1	1.02564
LamPP	38200	28.2	1.02564
LamPP	38300	28.3	1.28205
LamPP	38400	28.4	1.02564
LamPP	38500	28.5	1.02564
LamPP	38600	28.6	1.02564
LamPP	38700	28.7	1.02564
LamPP	38800	28.8	1.02564
LamPP	38900	28.9	1.02564
LamPP	39000	29	1.02564
LamPP	39100	29.1	1.02564
LamPP	39200	29.2	1.02564
LamPP	39300	29.3	1.02564
LamPP	39400	29.4	1.02564
LamPP	39500	29.5	1.02564
LamPP	39600	29.6	1.02564
LamPP	39700	29.7	1.02564
LamPP	39800	29.8	1.02564
LamPP	39900	29.9	1.02564
LamPP	40000	30	1.28205
LamPP	40100	30.1	1.02564
LamPP	40200	30.2	1.02564
LamPP	40300	30.3	1.02564
LamPP	40400	30.4	1.02564
LamPP	40500	30.5	1.28205
LamPP	40600	30.6	1.02564
LamPP	40700	30.7	1.28205
LamPP	40800	30.8	1.02564
LamPP	40900	30.9	1.02564
LamPP	41000	31	1.02564
LamPP	41100	31.1	1.02564
LamPP	41200	31.2	1.28205
LamPP	41300	31.3	1.02564
LamPP	41400	31.4	1.02564
LamPP	41500	31.5	1.02564
LamPP	41600	31.6	1.02564
LamPP	41700	31.7	1.02564
LamPP	41800	31.8	1.02564
LamPP	41900	31.9	1.28205
LamPP	42000	32	1.02564
LamPP	42100	32.1	1.02564
LamPP	42200	32.2	1.02564
LamPP	42300	32.3	1.02564
LamPP	42400	32.4	1.28205
LamPP	42500	32.5	1.02564
LamPP	42600	32.6	1.02564
LamPP	42700	32.7	1.02564
LamPP	42800	32.8	1.02564
LamPP	42900	32.9	1.02564
LamPP	43000	33	1.02564
LamPP	43100	33.1	1.28205
LamPP	43200	33.2	1.02564
LamPP	43300	33.3	1.02564
LamPP	43400	33.4	1.02564
LamPP	43500	33.5	1.02564
LamPP	43600	33.6	1.28205
LamPP	43700	33.7	1.02564
LamPP	43800	33.8	1.02564
LamPP	43900	33.9	1.02564
LamPP	44000	34	1.02564
LamPP	44100	34.1	1.02564
LamPP	44200	34.2	1.02564
LamPP	44300	34.3	1.02564
LamPP	44400	34.4	0.769231
LamPP	44500	34.5	1.02564

## Sheet: E
Line	Range	Frame	X	Y
LamPP	Atrium	0	-5	0
LamPP	Atrium	1	-4.98571	0
LamPP	Atrium	2	-4.97143	0
LamPP	Atrium	3	-4.95714	0
LamPP	Atrium	4	-4.94286	0
LamPP	Atrium	5	-4.92857	0
LamPP	Atrium	6	-4.91429	0
LamPP	Atrium	7	-4.9	0
LamPP	Atrium	8	-4.88571	0
LamPP	Atrium	9	-4.87143	0
LamPP	Atrium	10	-4.85714	0
LamPP	Atrium	11	-4.84286	0
LamPP	Atrium	12	-4.82857	0
LamPP	Atrium	13	-4.81429	0
LamPP	Atrium	14	-4.8	0
LamPP	Atrium	15	-4.78571	0
LamPP	Atrium	16	-4.77143	0
LamPP	Atrium	17	-4.75714	0
LamPP	Atrium	18	-4.74286	0
LamPP	Atrium	19	-4.72857	0
LamPP	Atrium	20	-4.71429	0
LamPP	Atrium	21	-4.7	0
LamPP	Atrium	22	-4.68571	0
LamPP	Atrium	23	-4.67143	0
LamPP	Atrium	24	-4.65714	0
LamPP	Atrium	25	-4.64286	0
LamPP	Atrium	26	-4.62857	0
LamPP	Atrium	27	-4.61429	0
LamPP	Atrium	28	-4.6	0
LamPP	Atrium	29	-4.58571	0
LamPP	Atrium	30	-4.57143	0
LamPP	Atrium	31	-4.55714	0
LamPP	Atrium	32	-4.54286	0
LamPP	Atrium	33	-4.52857	0
LamPP	Atrium	34	-4.51429	0
LamPP	Atrium	35	-4.5	0
LamPP	Atrium	36	-4.48571	0
LamPP	Atrium	37	-4.47143	0
LamPP	Atrium	38	-4.45714	0
LamPP	Atrium	39	-4.44286	0
LamPP	Atrium	40	-4.42857	0
LamPP	Atrium	41	-4.41429	0
LamPP	Atrium	42	-4.4	0
LamPP	Atrium	43	-4.38571	0
LamPP	Atrium	44	-4.37143	0
LamPP	Atrium	45	-4.35714	0
LamPP	Atrium	46	-4.34286	0
LamPP	Atrium	47	-4.32857	0
LamPP	Atrium	48	-4.31429	0
LamPP	Atrium	49	-4.3	0
LamPP	Atrium	50	-4.28571	0
LamPP	Atrium	51	-4.27143	0
LamPP	Atrium	52	-4.25714	0
LamPP	Atrium	53	-4.24286	0
LamPP	Atrium	54	-4.22857	0
LamPP	Atrium	55	-4.21429	0
LamPP	Atrium	56	-4.2	0
LamPP	Atrium	57	-4.18571	0
LamPP	Atrium	58	-4.17143	0
LamPP	Atrium	59	-4.15714	0
LamPP	Atrium	60	-4.14286	0
LamPP	Atrium	61	-4.12857	0
LamPP	Atrium	62	-4.11429	0
LamPP	Atrium	63	-4.1	0
LamPP	Atrium	64	-4.08571	0
LamPP	Atrium	65	-4.07143	0
LamPP	Atrium	66	-4.05714	0
LamPP	Atrium	67	-4.04286	0
LamPP	Atrium	68	-4.02857	0
LamPP	Atrium	69	-4.01429	0
LamPP	Atrium	70	-4	0
LamPP	Atrium	71	-3.98571	0
LamPP	Atrium	72	-3.97143	0
LamPP	Atrium	73	-3.95714	0
LamPP	Atrium	74	-3.94286	0
LamPP	Atrium	75	-3.92857	0
LamPP	Atrium	76	-3.91429	0
LamPP	Atrium	77	-3.9	0
LamPP	Atrium	78	-3.88571	0
LamPP	Atrium	79	-3.87143	0
LamPP	Atrium	80	-3.85714	0
LamPP	Atrium	81	-3.84286	0
LamPP	Atrium	82	-3.82857	0
LamPP	Atrium	83	-3.81429	0
LamPP	Atrium	84	-3.8	0
LamPP	Atrium	85	-3.78571	0
LamPP	Atrium	86	-3.77143	0
LamPP	Atrium	87	-3.75714	0
LamPP	Atrium	88	-3.74286	0
LamPP	Atrium	89	-3.72857	0
LamPP	Atrium	90	-3.71429	0
LamPP	Atrium	91	-3.7	0
LamPP	Atrium	92	-3.68571	0
LamPP	Atrium	93	-3.67143	0
LamPP	Atrium	94	-3.65714	0
LamPP	Atrium	95	-3.64286	0
LamPP	Atrium	96	-3.62857	0
LamPP	Atrium	97	-3.61429	0
LamPP	Atrium	98	-3.6	0
LamPP	Atrium	99	-3.58571	0
LamPP	Atrium	100	-3.57143	0
LamPP	Atrium	101	-3.55714	0
LamPP	Atrium	102	-3.54286	0
LamPP	Atrium	103	-3.52857	0
LamPP	Atrium	104	-3.51429	0
LamPP	Atrium	105	-3.5	0
LamPP	Atrium	106	-3.48571	0
LamPP	Atrium	107	-3.47143	0
LamPP	Atrium	108	-3.45714	0
LamPP	Atrium	109	-3.44286	0
LamPP	Atrium	110	-3.42857	0
LamPP	Atrium	111	-3.41429	0
LamPP	Atrium	112	-3.4	0
LamPP	Atrium	113	-3.38571	0
LamPP	Atrium	114	-3.37143	0
LamPP	Atrium	115	-3.35714	0
LamPP	Atrium	116	-3.34286	0
LamPP	Atrium	117	-3.32857	0
LamPP	Atrium	118	-3.31429	0
LamPP	Atrium	119	-3.3	0
LamPP	Atrium	120	-3.28571	0
LamPP	Atrium	121	-3.27143	0
LamPP	Atrium	122	-3.25714	0
LamPP	Atrium	123	-3.24286	0
LamPP	Atrium	124	-3.22857	0
LamPP	Atrium	125	-3.21429	0
LamPP	Atrium	126	-3.2	0
LamPP	Atrium	127	-3.18571	0
LamPP	Atrium	128	-3.17143	0
LamPP	Atrium	129	-3.15714	0
LamPP	Atrium	130	-3.14286	0
LamPP	Atrium	131	-3.12857	0
LamPP	Atrium	132	-3.11429	0
LamPP	Atrium	133	-3.1	0
LamPP	Atrium	134	-3.08571	0
LamPP	Atrium	135	-3.07143	0
LamPP	Atrium	136	-3.05714	0
LamPP	Atrium	137	-3.04286	0
LamPP	Atrium	138	-3.02857	0
LamPP	Atrium	139	-3.01429	0
LamPP	Atrium	140	-3	0
LamPP	Atrium	141	-2.98571	0
LamPP	Atrium	142	-2.97143	0
LamPP	Atrium	143	-2.95714	0
LamPP	Atrium	144	-2.94286	0
LamPP	Atrium	145	-2.92857	0
LamPP	Atrium	146	-2.91429	0
LamPP	Atrium	147	-2.9	0
LamPP	Atrium	148	-2.88571	0
LamPP	Atrium	149	-2.87143	0
LamPP	Atrium	150	-2.85714	0
LamPP	Atrium	151	-2.84286	0
LamPP	Atrium	152	-2.82857	0
LamPP	Atrium	153	-2.81429	0
LamPP	Atrium	154	-2.8	0
LamPP	Atrium	155	-2.78571	0
LamPP	Atrium	156	-2.77143	0
LamPP	Atrium	157	-2.75714	0
LamPP	Atrium	158	-2.74286	0
LamPP	Atrium	159	-2.72857	0
LamPP	Atrium	160	-2.71429	0
LamPP	Atrium	161	-2.7	0
LamPP	Atrium	162	-2.68571	0
LamPP	Atrium	163	-2.67143	0
LamPP	Atrium	164	-2.65714	0
LamPP	Atrium	165	-2.64286	0
LamPP	Atrium	166	-2.62857	0
LamPP	Atrium	167	-2.61429	0
LamPP	Atrium	168	-2.6	0
LamPP	Atrium	169	-2.58571	0
LamPP	Atrium	170	-2.57143	0
LamPP	Atrium	171	-2.55714	0
LamPP	Atrium	172	-2.54286	0
LamPP	Atrium	173	-2.52857	0
LamPP	Atrium	174	-2.51429	0
LamPP	Atrium	175	-2.5	0
LamPP	Atrium	176	-2.48571	0
LamPP	Atrium	177	-2.47143	0
LamPP	Atrium	178	-2.45714	0
LamPP	Atrium	179	-2.44286	0
LamPP	Atrium	180	-2.42857	0
LamPP	Atrium	181	-2.41429	0
LamPP	Atrium	182	-2.4	0
LamPP	Atrium	183	-2.38571	0
LamPP	Atrium	184	-2.37143	0
LamPP	Atrium	185	-2.35714	0
LamPP	Atrium	186	-2.34286	0
LamPP	Atrium	187	-2.32857	0
LamPP	Atrium	188	-2.31429	0
LamPP	Atrium	189	-2.3	0
LamPP	Atrium	190	-2.28571	0
LamPP	Atrium	191	-2.27143	0
LamPP	Atrium	192	-2.25714	0
LamPP	Atrium	193	-2.24286	0
LamPP	Atrium	194	-2.22857	0
LamPP	Atrium	195	-2.21429	0
LamPP	Atrium	196	-2.2	0
LamPP	Atrium	197	-2.18571	0
LamPP	Atrium	198	-2.17143	0
LamPP	Atrium	199	-2.15714	0
LamPP	Atrium	200	-2.14286	0
LamPP	Atrium	201	-2.12857	0
LamPP	Atrium	202	-2.11429	0
LamPP	Atrium	203	-2.1	0
LamPP	Atrium	204	-2.08571	0
LamPP	Atrium	205	-2.07143	0
LamPP	Atrium	206	-2.05714	0
LamPP	Atrium	207	-2.04286	0
LamPP	Atrium	208	-2.02857	0
LamPP	Atrium	209	-2.01429	0
LamPP	Atrium	210	-2	0
LamPP	Atrium	211	-1.98571	0
LamPP	Atrium	212	-1.97143	0
LamPP	Atrium	213	-1.95714	0
LamPP	Atrium	214	-1.94286	0
LamPP	Atrium	215	-1.92857	0
LamPP	Atrium	216	-1.91429	0
LamPP	Atrium	217	-1.9	0
LamPP	Atrium	218	-1.88571	0
LamPP	Atrium	219	-1.87143	0
LamPP	Atrium	220	-1.85714	0
LamPP	Atrium	221	-1.84286	0
LamPP	Atrium	222	-1.82857	0
LamPP	Atrium	223	-1.81429	0
LamPP	Atrium	224	-1.8	0
LamPP	Atrium	225	-1.78571	0
LamPP	Atrium	226	-1.77143	0
LamPP	Atrium	227	-1.75714	0
LamPP	Atrium	228	-1.74286	0
LamPP	Atrium	229	-1.72857	0
LamPP	Atrium	230	-1.71429	0
LamPP	Atrium	231	-1.7	0
LamPP	Atrium	232	-1.68571	0
LamPP	Atrium	233	-1.67143	0
LamPP	Atrium	234	-1.65714	0
LamPP	Atrium	235	-1.64286	0
LamPP	Atrium	236	-1.62857	0
LamPP	Atrium	237	-1.61429	0
LamPP	Atrium	238	-1.6	0
LamPP	Atrium	239	-1.58571	0
LamPP	Atrium	240	-1.57143	0
LamPP	Atrium	241	-1.55714	0
LamPP	Atrium	242	-1.54286	0
LamPP	Atrium	243	-1.52857	0
LamPP	Atrium	244	-1.51429	0
LamPP	Atrium	245	-1.5	0
LamPP	Atrium	246	-1.48571	0
LamPP	Atrium	247	-1.47143	0
LamPP	Atrium	248	-1.45714	0
LamPP	Atrium	249	-1.44286	0
LamPP	Atrium	250	-1.42857	0
LamPP	Atrium	251	-1.41429	0
LamPP	Atrium	252	-1.4	0
LamPP	Atrium	253	-1.38571	0
LamPP	Atrium	254	-1.37143	0
LamPP	Atrium	255	-1.35714	0
LamPP	Atrium	256	-1.34286	0
LamPP	Atrium	257	-1.32857	0
LamPP	Atrium	258	-1.31429	0
LamPP	Atrium	259	-1.3	0
LamPP	Atrium	260	-1.28571	0
LamPP	Atrium	261	-1.27143	0
LamPP	Atrium	262	-1.25714	0
LamPP	Atrium	263	-1.24286	0
LamPP	Atrium	264	-1.22857	0
LamPP	Atrium	265	-1.21429	0
LamPP	Atrium	266	-1.2	0
LamPP	Atrium	267	-1.18571	0
LamPP	Atrium	268	-1.17143	0
LamPP	Atrium	269	-1.15714	0
LamPP	Atrium	270	-1.14286	0
LamPP	Atrium	271	-1.12857	0
LamPP	Atrium	272	-1.11429	0
LamPP	Atrium	273	-1.1	0
LamPP	Atrium	274	-1.08571	0
LamPP	Atrium	275	-1.07143	0
LamPP	Atrium	276	-1.05714	0
LamPP	Atrium	277	-1.04286	0
LamPP	Atrium	278	-1.02857	0
LamPP	Atrium	279	-1.01429	0
LamPP	Atrium	280	-1	0
LamPP	Atrium	281	-0.985714	0
LamPP	Atrium	282	-0.971429	0
LamPP	Atrium	283	-0.957143	0
LamPP	Atrium	284	-0.942857	0
LamPP	Atrium	285	-0.928571	0
LamPP	Atrium	286	-0.914286	0
LamPP	Atrium	287	-0.9	0
LamPP	Atrium	288	-0.885714	0
LamPP	Atrium	289	-0.871429	0
LamPP	Atrium	290	-0.857143	0
LamPP	Atrium	291	-0.842857	0
LamPP	Atrium	292	-0.828571	0
LamPP	Atrium	293	-0.814286	0
LamPP	Atrium	294	-0.8	0
LamPP	Atrium	295	-0.785714	0
LamPP	Atrium	296	-0.771429	0
LamPP	Atrium	297	-0.757143	0
LamPP	Atrium	298	-0.742857	0
LamPP	Atrium	299	-0.728571	0
LamPP	Atrium	300	-0.714286	0
LamPP	Atrium	301	-0.7	0
LamPP	Atrium	302	-0.685714	0
LamPP	Atrium	303	-0.671429	0
LamPP	Atrium	304	-0.657143	0
LamPP	Atrium	305	-0.642857	0
LamPP	Atrium	306	-0.628571	0
LamPP	Atrium	307	-0.614286	0
LamPP	Atrium	308	-0.6	0
LamPP	Atrium	309	-0.585714	0
LamPP	Atrium	310	-0.571429	0
LamPP	Atrium	311	-0.557143	0
LamPP	Atrium	312	-0.542857	0
LamPP	Atrium	313	-0.528571	0
LamPP	Atrium	314	-0.514286	0
LamPP	Atrium	315	-0.5	0
LamPP	Atrium	316	-0.485714	0
LamPP	Atrium	317	-0.471429	0
LamPP	Atrium	318	-0.457143	0
LamPP	Atrium	319	-0.442857	0
LamPP	Atrium	320	-0.428571	0
LamPP	Atrium	321	-0.414286	0
LamPP	Atrium	322	-0.4	0
LamPP	Atrium	323	-0.385714	0
LamPP	Atrium	324	-0.371429	0
LamPP	Atrium	325	-0.357143	0
LamPP	Atrium	326	-0.342857	0
LamPP	Atrium	327	-0.328571	0
LamPP	Atrium	328	-0.314286	0
LamPP	Atrium	329	-0.3	0
LamPP	Atrium	330	-0.285714	0
LamPP	Atrium	331	-0.271429	0
LamPP	Atrium	332	-0.257143	0
LamPP	Atrium	333	-0.242857	0
LamPP	Atrium	334	-0.228571	0
LamPP	Atrium	335	-0.214286	0
LamPP	Atrium	336	-0.2	0
LamPP	Atrium	337	-0.185714	0
LamPP	Atrium	338	-0.171429	0
LamPP	Atrium	339	-0.157143	0
LamPP	Atrium	340	-0.142857	0
LamPP	Atrium	341	-0.128571	0
LamPP	Atrium	342	-0.114286	0
LamPP	Atrium	343	-0.1	0
LamPP	Atrium	344	-0.0857143	0
LamPP	Atrium	345	-0.0714286	0
LamPP	Atrium	346	-0.0571429	0
LamPP	Atrium	347	-0.0428571	0
LamPP	Atrium	348	-0.0285714	0
LamPP	Atrium	349	-0.0142857	0
LamPP	Atrium	350	0	10.2
LamPP	Atrium	351	0.0142857	10.2
LamPP	Atrium	352	0.0285714	10.2
LamPP	Atrium	353	0.0428571	10.2
LamPP	Atrium	354	0.0571429	10.2
LamPP	Atrium	355	0.0714286	10.2
LamPP	Atrium	356	0.0857143	10.2
LamPP	Atrium	357	0.1	10.2
LamPP	Atrium	358	0.114286	10.2
LamPP	Atrium	359	0.128571	10.2
LamPP	Atrium	360	0.142857	10.2
LamPP	Atrium	361	0.157143	10.2
LamPP	Atrium	362	0.171429	10.2
LamPP	Atrium	363	0.185714	10.2
LamPP	Atrium	364	0.2	10.2
LamPP	Atrium	365	0.214286	10.2
LamPP	Atrium	366	0.228571	10.2
LamPP	Atrium	367	0.242857	10.2
LamPP	Atrium	368	0.257143	10.2
LamPP	Atrium	369	0.271429	10.2
LamPP	Atrium	370	0.285714	10.2
LamPP	Atrium	371	0.3	10.2
LamPP	Atrium	372	0.314286	10.2
LamPP	Atrium	373	0.328571	10.2
LamPP	Atrium	374	0.342857	10.2
LamPP	Atrium	375	0.357143	10.2
LamPP	Atrium	376	0.371429	10.2
LamPP	Atrium	377	0.385714	10.2
LamPP	Atrium	378	0.4	10.2
LamPP	Atrium	379	0.414286	10.2
LamPP	Atrium	380	0.428571	10.2
LamPP	Atrium	381	0.442857	10.2
LamPP	Atrium	382	0.457143	10.2
LamPP	Atrium	383	0.471429	10.2
LamPP	Atrium	384	0.485714	10.2
LamPP	Atrium	385	0.5	10.2
LamPP	Atrium	386	0.514286	10.2
LamPP	Atrium	387	0.528571	10.2
LamPP	Atrium	388	0.542857	10.2
LamPP	Atrium	389	0.557143	10.2
LamPP	Atrium	390	0.571429	10.2
LamPP	Atrium	391	0.585714	10.2
LamPP	Atrium	392	0.6	10.2
LamPP	Atrium	393	0.614286	10.2
LamPP	Atrium	394	0.628571	10.2
LamPP	Atrium	395	0.642857	10.2
LamPP	Atrium	396	0.657143	10.2
LamPP	Atrium	397	0.671429	10.2
LamPP	Atrium	398	0.685714	10.2
LamPP	Atrium	399	0.7	10.2
LamPP	Atrium	400	0.714286	10.2
LamPP	Atrium	401	0.728571	10.2
LamPP	Atrium	402	0.742857	10.2
LamPP	Atrium	403	0.757143	10.2
LamPP	Atrium	404	0.771429	10.2
LamPP	Atrium	405	0.785714	10.2
LamPP	Atrium	406	0.8	10.2
LamPP	Atrium	407	0.814286	10.2
LamPP	Atrium	408	0.828571	10.2
LamPP	Atrium	409	0.842857	10.2
LamPP	Atrium	410	0.857143	10.2
LamPP	Atrium	411	0.871429	10.2
LamPP	Atrium	412	0.885714	10.2
LamPP	Atrium	413	0.9	10.2
LamPP	Atrium	414	0.914286	10.2
LamPP	Atrium	415	0.928571	10.2
LamPP	Atrium	416	0.942857	10.2
LamPP	Atrium	417	0.957143	10.2
LamPP	Atrium	418	0.971429	10.2
LamPP	Atrium	419	0.985714	10.2
LamPP	Atrium	420	1	10.2
LamPP	Atrium	421	1.01429	0
LamPP	Atrium	422	1.02857	0
LamPP	Atrium	423	1.04286	0
LamPP	Atrium	424	1.05714	0
LamPP	Atrium	425	1.07143	0
LamPP	Atrium	426	1.08571	0
LamPP	Atrium	427	1.1	0
LamPP	Atrium	428	1.11429	0
LamPP	Atrium	429	1.12857	0
LamPP	Atrium	430	1.14286	0
LamPP	Atrium	431	1.15714	0
LamPP	Atrium	432	1.17143	0
LamPP	Atrium	433	1.18571	0
LamPP	Atrium	434	1.2	0
LamPP	Atrium	435	1.21429	0
LamPP	Atrium	436	1.22857	0
LamPP	Atrium	437	1.24286	0
LamPP	Atrium	438	1.25714	0
LamPP	Atrium	439	1.27143	0
LamPP	Atrium	440	1.28571	0
LamPP	Atrium	441	1.3	0
LamPP	Atrium	442	1.31429	0
LamPP	Atrium	443	1.32857	0
LamPP	Atrium	444	1.34286	0
LamPP	Atrium	445	1.35714	0
LamPP	Atrium	446	1.37143	0
LamPP	Atrium	447	1.38571	0
LamPP	Atrium	448	1.4	0
LamPP	Atrium	449	1.41429	0
LamPP	Atrium	450	1.42857	0
LamPP	Atrium	451	1.44286	0
LamPP	Atrium	452	1.45714	0
LamPP	Atrium	453	1.47143	0
LamPP	Atrium	454	1.48571	0
LamPP	Atrium	455	1.5	0
LamPP	Atrium	456	1.51429	0
LamPP	Atrium	457	1.52857	0
LamPP	Atrium	458	1.54286	0
LamPP	Atrium	459	1.55714	0
LamPP	Atrium	460	1.57143	0
LamPP	Atrium	461	1.58571	0
LamPP	Atrium	462	1.6	0
LamPP	Atrium	463	1.61429	0
LamPP	Atrium	464	1.62857	0
LamPP	Atrium	465	1.64286	0
LamPP	Atrium	466	1.65714	0
LamPP	Atrium	467	1.67143	0
LamPP	Atrium	468	1.68571	0
LamPP	Atrium	469	1.7	0
LamPP	Atrium	470	1.71429	0
LamPP	Atrium	471	1.72857	0
LamPP	Atrium	472	1.74286	0
LamPP	Atrium	473	1.75714	0
LamPP	Atrium	474	1.77143	0
LamPP	Atrium	475	1.78571	0
LamPP	Atrium	476	1.8	0
LamPP	Atrium	477	1.81429	0
LamPP	Atrium	478	1.82857	0
LamPP	Atrium	479	1.84286	0
LamPP	Atrium	480	1.85714	0
LamPP	Atrium	481	1.87143	0
LamPP	Atrium	482	1.88571	0
LamPP	Atrium	483	1.9	0
LamPP	Atrium	484	1.91429	0
LamPP	Atrium	485	1.92857	0
LamPP	Atrium	486	1.94286	0
LamPP	Atrium	487	1.95714	0
LamPP	Atrium	488	1.97143	0
LamPP	Atrium	489	1.98571	0
LamPP	Atrium	490	2	0
LamPP	Atrium	491	2.01429	0
LamPP	Atrium	492	2.02857	0
LamPP	Atrium	493	2.04286	0
LamPP	Atrium	494	2.05714	0
LamPP	Atrium	495	2.07143	0
LamPP	Atrium	496	2.08571	0
LamPP	Atrium	497	2.1	0
LamPP	Atrium	498	2.11429	0
LamPP	Atrium	499	2.12857	0
LamPP	Atrium	500	2.14286	0
LamPP	Atrium	501	2.15714	0
LamPP	Atrium	502	2.17143	0
LamPP	Atrium	503	2.18571	0
LamPP	Atrium	504	2.2	0
LamPP	Atrium	505	2.21429	0
LamPP	Atrium	506	2.22857	0
LamPP	Atrium	507	2.24286	0
LamPP	Atrium	508	2.25714	0
LamPP	Atrium	509	2.27143	0
LamPP	Atrium	510	2.28571	0
LamPP	Atrium	511	2.3	0
LamPP	Atrium	512	2.31429	0
LamPP	Atrium	513	2.32857	0
LamPP	Atrium	514	2.34286	0
LamPP	Atrium	515	2.35714	0
LamPP	Atrium	516	2.37143	0
LamPP	Atrium	517	2.38571	0
LamPP	Atrium	518	2.4	0
LamPP	Atrium	519	2.41429	0
LamPP	Atrium	520	2.42857	0
LamPP	Atrium	521	2.44286	0
LamPP	Atrium	522	2.45714	0
LamPP	Atrium	523	2.47143	0
LamPP	Atrium	524	2.48571	0
LamPP	Atrium	525	2.5	0
LamPP	Atrium	526	2.51429	0
LamPP	Atrium	527	2.52857	0
LamPP	Atrium	528	2.54286	0
LamPP	Atrium	529	2.55714	0
LamPP	Atrium	530	2.57143	0
LamPP	Atrium	531	2.58571	0
LamPP	Atrium	532	2.6	0
LamPP	Atrium	533	2.61429	0
LamPP	Atrium	534	2.62857	0
LamPP	Atrium	535	2.64286	0
LamPP	Atrium	536	2.65714	0
LamPP	Atrium	537	2.67143	0
LamPP	Atrium	538	2.68571	0
LamPP	Atrium	539	2.7	0
LamPP	Atrium	540	2.71429	0
LamPP	Atrium	541	2.72857	0
LamPP	Atrium	542	2.74286	0
LamPP	Atrium	543	2.75714	0
LamPP	Atrium	544	2.77143	0
LamPP	Atrium	545	2.78571	0
LamPP	Atrium	546	2.8	0
LamPP	Atrium	547	2.81429	0
LamPP	Atrium	548	2.82857	0
LamPP	Atrium	549	2.84286	0
LamPP	Atrium	550	2.85714	0
LamPP	Atrium	551	2.87143	0
LamPP	Atrium	552	2.88571	0
LamPP	Atrium	553	2.9	0
LamPP	Atrium	554	2.91429	0
LamPP	Atrium	555	2.92857	0
LamPP	Atrium	556	2.94286	0
LamPP	Atrium	557	2.95714	0
LamPP	Atrium	558	2.97143	0
LamPP	Atrium	559	2.98571	0
LamPP	Atrium	560	3	0
LamPP	Atrium	561	3.01429	0
LamPP	Atrium	562	3.02857	0
LamPP	Atrium	563	3.04286	0
LamPP	Atrium	564	3.05714	0
LamPP	Atrium	565	3.07143	0
LamPP	Atrium	566	3.08571	0
LamPP	Atrium	567	3.1	0
LamPP	Atrium	568	3.11429	0
LamPP	Atrium	569	3.12857	0
LamPP	Atrium	570	3.14286	0
LamPP	Atrium	571	3.15714	0
LamPP	Atrium	572	3.17143	0
LamPP	Atrium	573	3.18571	0
LamPP	Atrium	574	3.2	0
LamPP	Atrium	575	3.21429	0
LamPP	Atrium	576	3.22857	0
LamPP	Atrium	577	3.24286	0
LamPP	Atrium	578	3.25714	0
LamPP	Atrium	579	3.27143	0
LamPP	Atrium	580	3.28571	0
LamPP	Atrium	581	3.3	0
LamPP	Atrium	582	3.31429	0
LamPP	Atrium	583	3.32857	0
LamPP	Atrium	584	3.34286	0
LamPP	Atrium	585	3.35714	0
LamPP	Atrium	586	3.37143	0
LamPP	Atrium	587	3.38571	0
LamPP	Atrium	588	3.4	0
LamPP	Atrium	589	3.41429	0
LamPP	Atrium	590	3.42857	0
LamPP	Atrium	591	3.44286	0
LamPP	Atrium	592	3.45714	0
LamPP	Atrium	593	3.47143	0
LamPP	Atrium	594	3.48571	0
LamPP	Atrium	595	3.5	0
LamPP	Atrium	596	3.51429	0
LamPP	Atrium	597	3.52857	0
LamPP	Atrium	598	3.54286	0
LamPP	Atrium	599	3.55714	0
LamPP	Atrium	600	3.57143	0
LamPP	Atrium	601	3.58571	0
LamPP	Atrium	602	3.6	0
LamPP	Atrium	603	3.61429	0
LamPP	Atrium	604	3.62857	0
LamPP	Atrium	605	3.64286	0
LamPP	Atrium	606	3.65714	0
LamPP	Atrium	607	3.67143	0
LamPP	Atrium	608	3.68571	0
LamPP	Atrium	609	3.7	0
LamPP	Atrium	610	3.71429	0
LamPP	Atrium	611	3.72857	0
LamPP	Atrium	612	3.74286	0
LamPP	Atrium	613	3.75714	0
LamPP	Atrium	614	3.77143	0
LamPP	Atrium	615	3.78571	0
LamPP	Atrium	616	3.8	0
LamPP	Atrium	617	3.81429	0
LamPP	Atrium	618	3.82857	0
LamPP	Atrium	619	3.84286	0
LamPP	Atrium	620	3.85714	0
LamPP	Atrium	621	3.87143	0
LamPP	Atrium	622	3.88571	0
LamPP	Atrium	623	3.9	0
LamPP	Atrium	624	3.91429	0
LamPP	Atrium	625	3.92857	0
LamPP	Atrium	626	3.94286	0
LamPP	Atrium	627	3.95714	0
LamPP	Atrium	628	3.97143	0
LamPP	Atrium	629	3.98571	0
LamPP	Atrium	630	4	0
LamPP	Atrium	631	4.01429	0
LamPP	Atrium	632	4.02857	0
LamPP	Atrium	633	4.04286	0
LamPP	Atrium	634	4.05714	0
LamPP	Atrium	635	4.07143	0
LamPP	Atrium	636	4.08571	0
LamPP	Atrium	637	4.1	0
LamPP	Atrium	638	4.11429	0
LamPP	Atrium	639	4.12857	0
LamPP	Atrium	640	4.14286	0
LamPP	Atrium	641	4.15714	0
LamPP	Atrium	642	4.17143	0
LamPP	Atrium	643	4.18571	0
LamPP	Atrium	644	4.2	0
LamPP	Atrium	645	4.21429	0
LamPP	Atrium	646	4.22857	0
LamPP	Atrium	647	4.24286	0
LamPP	Atrium	648	4.25714	0
LamPP	Atrium	649	4.27143	0
LamPP	Atrium	650	4.28571	0
LamPP	Atrium	651	4.3	0
LamPP	Atrium	652	4.31429	0
LamPP	Atrium	653	4.32857	0
LamPP	Atrium	654	4.34286	0
LamPP	Atrium	655	4.35714	0
LamPP	Atrium	656	4.37143	0
LamPP	Atrium	657	4.38571	0
LamPP	Atrium	658	4.4	0
LamPP	Atrium	659	4.41429	0
LamPP	Atrium	660	4.42857	0
LamPP	Atrium	661	4.44286	0
LamPP	Atrium	662	4.45714	0
LamPP	Atrium	663	4.47143	0
LamPP	Atrium	664	4.48571	0
LamPP	Atrium	665	4.5	0
LamPP	Atrium	666	4.51429	0
LamPP	Atrium	667	4.52857	0
LamPP	Atrium	668	4.54286	0
LamPP	Atrium	669	4.55714	0
LamPP	Atrium	670	4.57143	0
LamPP	Atrium	671	4.58571	0
LamPP	Atrium	672	4.6	0
LamPP	Atrium	673	4.61429	0
LamPP	Atrium	674	4.62857	0
LamPP	Atrium	675	4.64286	0
LamPP	Atrium	676	4.65714	0
LamPP	Atrium	677	4.67143	0
LamPP	Atrium	678	4.68571	0
LamPP	Atrium	679	4.7	0
LamPP	Atrium	680	4.71429	0
LamPP	Atrium	681	4.72857	0
LamPP	Atrium	682	4.74286	0
LamPP	Atrium	683	4.75714	0
LamPP	Atrium	684	4.77143	0
LamPP	Atrium	685	4.78571	0
LamPP	Atrium	686	4.8	0
LamPP	Atrium	687	4.81429	0
LamPP	Atrium	688	4.82857	0
LamPP	Atrium	689	4.84286	0
LamPP	Atrium	690	4.85714	0
LamPP	Atrium	691	4.87143	0
LamPP	Atrium	692	4.88571	0
LamPP	Atrium	693	4.9	0
LamPP	Atrium	694	4.91429	6.8e-05
LamPP	Atrium	695	4.92857	6.8e-05
LamPP	Atrium	696	4.94286	6.8e-05
LamPP	Atrium	697	4.95714	6.8e-05
LamPP	Atrium	698	4.97143	6.8e-05
LamPP	Atrium	699	4.98571	6.8e-05
LamPP	Atrium	700	5	6.8e-05
LamPP	Atrium	701	5.01429	6.8e-05
LamPP	Atrium	702	5.02857	0.055196
LamPP	Atrium	703	5.04286	0.055104
LamPP	Atrium	704	5.05714	0.055104
LamPP	Atrium	705	5.07143	0.055092
LamPP	Atrium	706	5.08571	0.055092
LamPP	Atrium	707	5.1	0.055092
LamPP	Atrium	708	5.11429	0.055092
LamPP	Atrium	709	5.12857	0.130184
LamPP	Atrium	710	5.14286	0.13016
LamPP	Atrium	711	5.15714	0.130128
LamPP	Atrium	712	5.17143	0.130128
LamPP	Atrium	713	5.18571	0.130128
LamPP	Atrium	714	5.2	0.130128
LamPP	Atrium	715	5.21429	0.130128
LamPP	Atrium	716	5.22857	0.343696
LamPP	Atrium	717	5.24286	0.343636
LamPP	Atrium	718	5.25714	0.343636
LamPP	Atrium	719	5.27143	0.34362
LamPP	Atrium	720	5.28571	0.343608
LamPP	Atrium	721	5.3	0.343636
LamPP	Atrium	722	5.31429	0.343636
LamPP	Atrium	723	5.32857	0.233284
LamPP	Atrium	724	5.34286	0.233152
LamPP	Atrium	725	5.35714	0.233092
LamPP	Atrium	726	5.37143	0.233092
LamPP	Atrium	727	5.38571	0.233092
LamPP	Atrium	728	5.4	0.233092
LamPP	Atrium	729	5.41429	0.233092
LamPP	Atrium	730	5.42857	0.388384
LamPP	Atrium	731	5.44286	0.388292
LamPP	Atrium	732	5.45714	0.388244
LamPP	Atrium	733	5.47143	0.388244
LamPP	Atrium	734	5.48571	0.38826
LamPP	Atrium	735	5.5	0.38826
LamPP	Atrium	736	5.51429	0.38826
LamPP	Atrium	737	5.52857	0.422644
LamPP	Atrium	738	5.54286	0.422396
LamPP	Atrium	739	5.55714	0.422444
LamPP	Atrium	740	5.57143	0.422472
LamPP	Atrium	741	5.58571	0.422472
LamPP	Atrium	742	5.6	0.422472
LamPP	Atrium	743	5.61429	0.422472
LamPP	Atrium	744	5.62857	0.233728
LamPP	Atrium	745	5.64286	0.233576
LamPP	Atrium	746	5.65714	0.233576
LamPP	Atrium	747	5.67143	0.233576
LamPP	Atrium	748	5.68571	0.233576
LamPP	Atrium	749	5.7	0.233576
LamPP	Atrium	750	5.71429	0.233576
LamPP	Atrium	751	5.72857	0.69194
LamPP	Atrium	752	5.74286	0.691476
LamPP	Atrium	753	5.75714	0.691484
LamPP	Atrium	754	5.77143	0.691484
LamPP	Atrium	755	5.78571	0.691484
LamPP	Atrium	756	5.8	0.691484
LamPP	Atrium	757	5.81429	0.691484
LamPP	Atrium	758	5.82857	0.391484
LamPP	Atrium	759	5.84286	0.391364
LamPP	Atrium	760	5.85714	0.391316
LamPP	Atrium	761	5.87143	0.391316
LamPP	Atrium	762	5.88571	0.391316
LamPP	Atrium	763	5.9	0.391316
LamPP	Atrium	764	5.91429	0.391316
LamPP	Atrium	765	5.92857	0.68214
LamPP	Atrium	766	5.94286	0.6821
LamPP	Atrium	767	5.95714	0.682088
LamPP	Atrium	768	5.97143	0.682088
LamPP	Atrium	769	5.98571	0.682088
LamPP	Atrium	770	6	0.682088
LamPP	Atrium	771	6.01429	0.682088
LamPP	Atrium	772	6.02857	0.722084
LamPP	Atrium	773	6.04286	0.721556
LamPP	Atrium	774	6.05714	0.721528
LamPP	Atrium	775	6.07143	0.721556
LamPP	Atrium	776	6.08571	0.721512
LamPP	Atrium	777	6.1	0.721512
LamPP	Atrium	778	6.11429	0.721512
LamPP	Atrium	779	6.12857	0.364312
LamPP	Atrium	780	6.14286	0.363812
LamPP	Atrium	781	6.15714	0.363804
LamPP	Atrium	782	6.17143	0.363804
LamPP	Atrium	783	6.18571	0.363804
LamPP	Atrium	784	6.2	0.363804
LamPP	Atrium	785	6.21429	0.363804
LamPP	Atrium	786	6.22857	1.05956
LamPP	Atrium	787	6.24286	1.05903
LamPP	Atrium	788	6.25714	1.059
LamPP	Atrium	789	6.27143	1.05902
LamPP	Atrium	790	6.28571	1.05902
LamPP	Atrium	791	6.3	1.05902
LamPP	Atrium	792	6.31429	1.05902
LamPP	Atrium	793	6.32857	0.574312
LamPP	Atrium	794	6.34286	0.573952
LamPP	Atrium	795	6.35714	0.573996
LamPP	Atrium	796	6.37143	0.573948
LamPP	Atrium	797	6.38571	0.57392
LamPP	Atrium	798	6.4	0.573888
LamPP	Atrium	799	6.41429	0.57386
LamPP	Atrium	800	6.42857	0.854724
LamPP	Atrium	801	6.44286	0.854508
LamPP	Atrium	802	6.45714	0.85442
LamPP	Atrium	803	6.47143	0.85442
LamPP	Atrium	804	6.48571	0.85442
LamPP	Atrium	805	6.5	0.85442
LamPP	Atrium	806	6.51429	0.85442
LamPP	Atrium	807	6.52857	0.980376
LamPP	Atrium	808	6.54286	0.980028
LamPP	Atrium	809	6.55714	0.980004
LamPP	Atrium	810	6.57143	0.980028
LamPP	Atrium	811	6.58571	0.980036
LamPP	Atrium	812	6.6	0.980036
LamPP	Atrium	813	6.61429	0.980036
LamPP	Atrium	814	6.62857	0.517716
LamPP	Atrium	815	6.64286	0.517528
LamPP	Atrium	816	6.65714	0.51752
LamPP	Atrium	817	6.67143	0.51752
LamPP	Atrium	818	6.68571	0.5181
LamPP	Atrium	819	6.7	0.517908
LamPP	Atrium	820	6.71429	0.51784
LamPP	Atrium	821	6.72857	1.20819
LamPP	Atrium	822	6.74286	1.20704
LamPP	Atrium	823	6.75714	1.20697
LamPP	Atrium	824	6.77143	1.207
LamPP	Atrium	825	6.78571	1.20702
LamPP	Atrium	826	6.8	1.20702
LamPP	Atrium	827	6.81429	1.20702
LamPP	Atrium	828	6.82857	0.758776
LamPP	Atrium	829	6.84286	0.758272
LamPP	Atrium	830	6.85714	0.758184
LamPP	Atrium	831	6.87143	0.758236
LamPP	Atrium	832	6.88571	0.758208
LamPP	Atrium	833	6.9	0.758236
LamPP	Atrium	834	6.91429	0.758208
LamPP	Atrium	835	6.92857	0.972784
LamPP	Atrium	836	6.94286	0.972232
LamPP	Atrium	837	6.95714	0.972176
LamPP	Atrium	838	6.97143	0.972204
LamPP	Atrium	839	6.98571	0.97218
LamPP	Atrium	840	7	0.972176
LamPP	Atrium	841	7.01429	0.972176
LamPP	Atrium	842	7.02857	1.12398
LamPP	Atrium	843	7.04286	1.1236
LamPP	Atrium	844	7.05714	1.1235
LamPP	Atrium	845	7.07143	1.12349
LamPP	Atrium	846	7.08571	1.12349
LamPP	Atrium	847	7.1	1.12349
LamPP	Atrium	848	7.11429	1.12349
LamPP	Atrium	849	7.12857	0.6774
LamPP	Atrium	850	7.14286	0.677156
LamPP	Atrium	851	7.15714	0.67714
LamPP	Atrium	852	7.17143	0.677156
LamPP	Atrium	853	7.18571	0.677168
LamPP	Atrium	854	7.2	0.677168
LamPP	Atrium	855	7.21429	0.677156
LamPP	Atrium	856	7.22857	1.29707
LamPP	Atrium	857	7.24286	1.29652
LamPP	Atrium	858	7.25714	1.29656
LamPP	Atrium	859	7.27143	1.29647
LamPP	Atrium	860	7.28571	1.29647
LamPP	Atrium	861	7.3	1.29647
LamPP	Atrium	862	7.31429	1.29647
LamPP	Atrium	863	7.32857	0.868424
LamPP	Atrium	864	7.34286	0.867716
LamPP	Atrium	865	7.35714	0.8677
LamPP	Atrium	866	7.37143	0.867716
LamPP	Atrium	867	7.38571	0.867716
LamPP	Atrium	868	7.4	0.867716
LamPP	Atrium	869	7.41429	0.867716
LamPP	Atrium	870	7.42857	1.08428
LamPP	Atrium	871	7.44286	1.08375
LamPP	Atrium	872	7.45714	1.08376
LamPP	Atrium	873	7.47143	1.08372
LamPP	Atrium	874	7.48571	1.08372
LamPP	Atrium	875	7.5	1.08372
LamPP	Atrium	876	7.51429	1.08372
LamPP	Atrium	877	7.52857	1.08372
LamPP	Atrium	878	7.54286	1.17929
LamPP	Atrium	879	7.55714	1.17878
LamPP	Atrium	880	7.57143	1.17862
LamPP	Atrium	881	7.58571	1.1786
LamPP	Atrium	882	7.6	1.1786
LamPP	Atrium	883	7.61429	1.1786
LamPP	Atrium	884	7.62857	1.1786
LamPP	Atrium	885	7.64286	0.81418
LamPP	Atrium	886	7.65714	0.814004
LamPP	Atrium	887	7.67143	0.81394
LamPP	Atrium	888	7.68571	0.813916
LamPP	Atrium	889	7.7	0.813916
LamPP	Atrium	890	7.71429	0.813916
LamPP	Atrium	891	7.72857	0.813916
LamPP	Atrium	892	7.74286	1.34077
LamPP	Atrium	893	7.75714	1.34032
LamPP	Atrium	894	7.77143	1.34044
LamPP	Atrium	895	7.78571	1.3404
LamPP	Atrium	896	7.8	1.34038
LamPP	Atrium	897	7.81429	1.34038
LamPP	Atrium	898	7.82857	1.3404
LamPP	Atrium	899	7.84286	0.886088
LamPP	Atrium	900	7.85714	0.885784
LamPP	Atrium	901	7.87143	0.885708
LamPP	Atrium	902	7.88571	0.885724
LamPP	Atrium	903	7.9	0.885724
LamPP	Atrium	904	7.91429	0.885724
LamPP	Atrium	905	7.92857	0.885724
LamPP	Atrium	906	7.94286	1.22857
LamPP	Atrium	907	7.95714	1.22796
LamPP	Atrium	908	7.97143	1.2278
LamPP	Atrium	909	7.98571	1.22781
LamPP	Atrium	910	8	1.2278
LamPP	Atrium	911	8.01429	1.22781
LamPP	Atrium	912	8.02857	1.2278
LamPP	Atrium	913	8.04286	1.14833
LamPP	Atrium	914	8.05714	1.14763
LamPP	Atrium	915	8.07143	1.14749
LamPP	Atrium	916	8.08571	1.1475
LamPP	Atrium	917	8.1	1.1475
LamPP	Atrium	918	8.11429	1.14747
LamPP	Atrium	919	8.12857	1.14747
LamPP	Atrium	920	8.14286	0.937664
LamPP	Atrium	921	8.15714	0.937236
LamPP	Atrium	922	8.17143	0.937296
LamPP	Atrium	923	8.18571	0.937296
LamPP	Atrium	924	8.2	0.937296
LamPP	Atrium	925	8.21429	0.937296
LamPP	Atrium	926	8.22857	0.937296
LamPP	Atrium	927	8.24286	1.34032
LamPP	Atrium	928	8.25714	1.3397
LamPP	Atrium	929	8.27143	1.33952
LamPP	Atrium	930	8.28571	1.33953
LamPP	Atrium	931	8.3	1.33955
LamPP	Atrium	932	8.31429	1.33956
LamPP	Atrium	933	8.32857	1.33956
LamPP	Atrium	934	8.34286	0.875664
LamPP	Atrium	935	8.35714	0.87518
LamPP	Atrium	936	8.37143	0.875164
LamPP	Atrium	937	8.38571	0.875164
LamPP	Atrium	938	8.4	0.875164
LamPP	Atrium	939	8.41429	0.87518
LamPP	Atrium	940	8.42857	0.87518
LamPP	Atrium	941	8.44286	1.35416
LamPP	Atrium	942	8.45714	1.3535
LamPP	Atrium	943	8.47143	1.35342
LamPP	Atrium	944	8.48571	1.35342
LamPP	Atrium	945	8.5	1.35342
LamPP	Atrium	946	8.51429	1.35342
LamPP	Atrium	947	8.52857	1.35342
LamPP	Atrium	948	8.54286	1.08789
LamPP	Atrium	949	8.55714	1.08732
LamPP	Atrium	950	8.57143	1.08723
LamPP	Atrium	951	8.58571	1.08725
LamPP	Atrium	952	8.6	1.08724
LamPP	Atrium	953	8.61429	1.08725
LamPP	Atrium	954	8.62857	1.08725
LamPP	Atrium	955	8.64286	1.09357
LamPP	Atrium	956	8.65714	1.09308
LamPP	Atrium	957	8.67143	1.09302
LamPP	Atrium	958	8.68571	1.09302
LamPP	Atrium	959	8.7	1.09302
LamPP	Atrium	960	8.71429	1.09302
LamPP	Atrium	961	8.72857	1.09302
LamPP	Atrium	962	8.74286	1.31232
LamPP	Atrium	963	8.75714	1.31169
LamPP	Atrium	964	8.77143	1.31164
LamPP	Atrium	965	8.78571	1.31163
LamPP	Atrium	966	8.8	1.31164
LamPP	Atrium	967	8.81429	1.31164
LamPP	Atrium	968	8.82857	1.31164
LamPP	Atrium	969	8.84286	0.88832
LamPP	Atrium	970	8.85714	0.88796
LamPP	Atrium	971	8.87143	0.88784
LamPP	Atrium	972	8.88571	0.88784
LamPP	Atrium	973	8.9	0.88784
LamPP	Atrium	974	8.91429	0.88784
LamPP	Atrium	975	8.92857	0.88784
LamPP	Atrium	976	8.94286	1.42106
LamPP	Atrium	977	8.95714	1.41998
LamPP	Atrium	978	8.97143	1.4199
LamPP	Atrium	979	8.98571	1.41985
LamPP	Atrium	980	9	1.41985
LamPP	Atrium	981	9.01429	1.41985
LamPP	Atrium	982	9.02857	1.41985
LamPP	Atrium	983	9.04286	1.00652
LamPP	Atrium	984	9.05714	1.00612
LamPP	Atrium	985	9.07143	1.0061
LamPP	Atrium	986	9.08571	1.0061
LamPP	Atrium	987	9.1	1.0061
LamPP	Atrium	988	9.11429	1.0061
LamPP	Atrium	989	9.12857	1.0061
LamPP	Atrium	990	9.14286	1.24674
LamPP	Atrium	991	9.15714	1.2463
LamPP	Atrium	992	9.17143	1.24618
LamPP	Atrium	993	9.18571	1.24618
LamPP	Atrium	994	9.2	1.24618
LamPP	Atrium	995	9.21429	1.24618
LamPP	Atrium	996	9.22857	1.24618
LamPP	Atrium	997	9.24286	1.21648
LamPP	Atrium	998	9.25714	1.21612
LamPP	Atrium	999	9.27143	1.21594
LamPP	Atrium	1000	9.28571	1.21594
LamPP	Atrium	1001	9.3	1.21594
LamPP	Atrium	1002	9.31429	1.21594
LamPP	Atrium	1003	9.32857	1.21594
LamPP	Atrium	1004	9.34286	0.995112
LamPP	Atrium	1005	9.35714	0.994752
LamPP	Atrium	1006	9.37143	0.994648
LamPP	Atrium	1007	9.38571	0.994648
LamPP	Atrium	1008	9.4	0.994632
LamPP	Atrium	1009	9.41429	0.994648
LamPP	Atrium	1010	9.42857	0.994632
LamPP	Atrium	1011	9.44286	1.37866
LamPP	Atrium	1012	9.45714	1.37769
LamPP	Atrium	1013	9.47143	1.37771
LamPP	Atrium	1014	9.48571	1.37768
LamPP	Atrium	1015	9.5	1.37768
LamPP	Atrium	1016	9.51429	1.37768
LamPP	Atrium	1017	9.52857	1.37768
LamPP	Atrium	1018	9.54286	0.95092
LamPP	Atrium	1019	9.55714	0.95032
LamPP	Atrium	1020	9.57143	0.95032
LamPP	Atrium	1021	9.58571	0.95032
LamPP	Atrium	1022	9.6	0.95032
LamPP	Atrium	1023	9.61429	0.95032
LamPP	Atrium	1024	9.62857	0.95032
LamPP	Atrium	1025	9.64286	1.43848
LamPP	Atrium	1026	9.65714	1.4379
LamPP	Atrium	1027	9.67143	1.4379
LamPP	Atrium	1028	9.68571	1.4379
LamPP	Atrium	1029	9.7	1.4379
LamPP	Atrium	1030	9.71429	1.4379
LamPP	Atrium	1031	9.72857	1.4379
LamPP	Atrium	1032	9.74286	1.10529
LamPP	Atrium	1033	9.75714	1.10462
LamPP	Atrium	1034	9.77143	1.10454
LamPP	Atrium	1035	9.78571	1.1045
LamPP	Atrium	1036	9.8	1.1045
LamPP	Atrium	1037	9.81429	1.1045
LamPP	Atrium	1038	9.82857	1.1045
LamPP	Atrium	1039	9.84286	1.33474
LamPP	Atrium	1040	9.85714	1.33416
LamPP	Atrium	1041	9.87143	1.33416
LamPP	Atrium	1042	9.88571	1.33416
LamPP	Atrium	1043	9.9	1.33416
LamPP	Atrium	1044	9.91429	1.33416
LamPP	Atrium	1045	9.92857	1.33416
LamPP	Atrium	1046	9.94286	1.30123
LamPP	Atrium	1047	9.95714	1.30094
LamPP	Atrium	1048	9.97143	1.30086
LamPP	Atrium	1049	9.98571	1.30082
LamPP	Atrium	1050	10	1.30081
LamPP	Atrium	1051	10.0143	1.30081
LamPP	Atrium	1052	10.0286	1.30081
LamPP	Atrium	1053	10.0429	1.30081
LamPP	Atrium	1054	10.0571	1.1156
LamPP	Atrium	1055	10.0714	1.11516
LamPP	Atrium	1056	10.0857	1.11514
LamPP	Atrium	1057	10.1	1.1151
LamPP	Atrium	1058	10.1143	1.11507
LamPP	Atrium	1059	10.1286	1.11508
LamPP	Atrium	1060	10.1429	1.11508
LamPP	Atrium	1061	10.1571	1.46876
LamPP	Atrium	1062	10.1714	1.46852
LamPP	Atrium	1063	10.1857	1.46842
LamPP	Atrium	1064	10.2	1.46835
LamPP	Atrium	1065	10.2143	1.46835
LamPP	Atrium	1066	10.2286	1.46836
LamPP	Atrium	1067	10.2429	1.46836
LamPP	Atrium	1068	10.2571	1.02073
LamPP	Atrium	1069	10.2714	1.01987
LamPP	Atrium	1070	10.2857	1.01986
LamPP	Atrium	1071	10.3	1.01984
LamPP	Atrium	1072	10.3143	1.01984
LamPP	Atrium	1073	10.3286	1.01984
LamPP	Atrium	1074	10.3429	1.01984
LamPP	Atrium	1075	10.3571	1.53487
LamPP	Atrium	1076	10.3714	1.53446
LamPP	Atrium	1077	10.3857	1.53438
LamPP	Atrium	1078	10.4	1.53438
LamPP	Atrium	1079	10.4143	1.53438
LamPP	Atrium	1080	10.4286	1.53436
LamPP	Atrium	1081	10.4429	1.53438
LamPP	Atrium	1082	10.4571	1.07749
LamPP	Atrium	1083	10.4714	1.07696
LamPP	Atrium	1084	10.4857	1.07687
LamPP	Atrium	1085	10.5	1.07687
LamPP	Atrium	1086	10.5143	1.0769
LamPP	Atrium	1087	10.5286	1.07687
LamPP	Atrium	1088	10.5429	1.0769
LamPP	Atrium	1089	10.5571	1.43949
LamPP	Atrium	1090	10.5714	1.43897
LamPP	Atrium	1091	10.5857	1.43892
LamPP	Atrium	1092	10.6	1.43891
LamPP	Atrium	1093	10.6143	1.43891
LamPP	Atrium	1094	10.6286	1.43891
LamPP	Atrium	1095	10.6429	1.43891
LamPP	Atrium	1096	10.6571	1.23138
LamPP	Atrium	1097	10.6714	1.23076
LamPP	Atrium	1098	10.6857	1.2307
LamPP	Atrium	1099	10.7	1.23067
LamPP	Atrium	1100	10.7143	1.23067
LamPP	Atrium	1101	10.7286	1.23067
LamPP	Atrium	1102	10.7429	1.23067
LamPP	Atrium	1103	10.7571	1.21301
LamPP	Atrium	1104	10.7714	1.21257
LamPP	Atrium	1105	10.7857	1.2125
LamPP	Atrium	1106	10.8	1.21252
LamPP	Atrium	1107	10.8143	1.21252
LamPP	Atrium	1108	10.8286	1.21252
LamPP	Atrium	1109	10.8429	1.21252
LamPP	Atrium	1110	10.8571	1.40578
LamPP	Atrium	1111	10.8714	1.40554
LamPP	Atrium	1112	10.8857	1.40552
LamPP	Atrium	1113	10.9	1.40552
LamPP	Atrium	1114	10.9143	1.40552
LamPP	Atrium	1115	10.9286	1.40552
LamPP	Atrium	1116	10.9429	1.40552
LamPP	Atrium	1117	10.9571	1.05928
LamPP	Atrium	1118	10.9714	1.05878
LamPP	Atrium	1119	10.9857	1.05876
LamPP	Atrium	1120	11	1.05874
LamPP	Atrium	1121	11.0143	1.05874
LamPP	Atrium	1122	11.0286	1.05874
LamPP	Atrium	1123	11.0429	1.05874
LamPP	Atrium	1124	11.0571	1.50596
LamPP	Atrium	1125	11.0714	1.50532
LamPP	Atrium	1126	11.0857	1.50527
LamPP	Atrium	1127	11.1	1.50527
LamPP	Atrium	1128	11.1143	1.50527
LamPP	Atrium	1129	11.1286	1.50524
LamPP	Atrium	1130	11.1429	1.50524
LamPP	Atrium	1131	11.1571	1.02644
LamPP	Atrium	1132	11.1714	1.02572
LamPP	Atrium	1133	11.1857	1.02562
LamPP	Atrium	1134	11.2	1.02561
LamPP	Atrium	1135	11.2143	1.02561
LamPP	Atrium	1136	11.2286	1.02561
LamPP	Atrium	1137	11.2429	1.02561
LamPP	Atrium	1138	11.2571	1.50602
LamPP	Atrium	1139	11.2714	1.50532
LamPP	Atrium	1140	11.2857	1.50524
LamPP	Atrium	1141	11.3	1.50521
LamPP	Atrium	1142	11.3143	1.50521
LamPP	Atrium	1143	11.3286	1.50521
LamPP	Atrium	1144	11.3429	1.50521
LamPP	Atrium	1145	11.3571	1.12781
LamPP	Atrium	1146	11.3714	1.12731
LamPP	Atrium	1147	11.3857	1.12731
LamPP	Atrium	1148	11.4	1.12731
LamPP	Atrium	1149	11.4143	1.12731
LamPP	Atrium	1150	11.4286	1.12731
LamPP	Atrium	1151	11.4429	1.12731
LamPP	Atrium	1152	11.4571	1.36982
LamPP	Atrium	1153	11.4714	1.36923
LamPP	Atrium	1154	11.4857	1.36909
LamPP	Atrium	1155	11.5	1.3691
LamPP	Atrium	1156	11.5143	1.3691
LamPP	Atrium	1157	11.5286	1.3691
LamPP	Atrium	1158	11.5429	1.3691
LamPP	Atrium	1159	11.5571	1.2598
LamPP	Atrium	1160	11.5714	1.25912
LamPP	Atrium	1161	11.5857	1.25911
LamPP	Atrium	1162	11.6	1.25906
LamPP	Atrium	1163	11.6143	1.25906
LamPP	Atrium	1164	11.6286	1.25906
LamPP	Atrium	1165	11.6429	1.25906
LamPP	Atrium	1166	11.6571	1.16564
LamPP	Atrium	1167	11.6714	1.1651
LamPP	Atrium	1168	11.6857	1.16506
LamPP	Atrium	1169	11.7	1.16507
LamPP	Atrium	1170	11.7143	1.16507
LamPP	Atrium	1171	11.7286	1.16507
LamPP	Atrium	1172	11.7429	1.16507
LamPP	Atrium	1173	11.7571	1.42423
LamPP	Atrium	1174	11.7714	1.42374
LamPP	Atrium	1175	11.7857	1.42373
LamPP	Atrium	1176	11.8	1.42376
LamPP	Atrium	1177	11.8143	1.42376
LamPP	Atrium	1178	11.8286	1.42376
LamPP	Atrium	1179	11.8429	1.42376
LamPP	Atrium	1180	11.8571	1.07091
LamPP	Atrium	1181	11.8714	1.07062
LamPP	Atrium	1182	11.8857	1.0706
LamPP	Atrium	1183	11.9	1.0706
LamPP	Atrium	1184	11.9143	1.0706
LamPP	Atrium	1185	11.9286	1.0706
LamPP	Atrium	1186	11.9429	1.0706
LamPP	Atrium	1187	11.9571	1.46069
LamPP	Atrium	1188	11.9714	1.45967
LamPP	Atrium	1189	11.9857	1.45952
LamPP	Atrium	1190	12	1.45948
LamPP	Atrium	1191	12.0143	1.45952
LamPP	Atrium	1192	12.0286	1.45949
LamPP	Atrium	1193	12.0429	1.45949
LamPP	Atrium	1194	12.0571	1.01934
LamPP	Atrium	1195	12.0714	1.01899
LamPP	Atrium	1196	12.0857	1.019
LamPP	Atrium	1197	12.1	1.01893
LamPP	Atrium	1198	12.1143	1.01891
LamPP	Atrium	1199	12.1286	1.01891
LamPP	Atrium	1200	12.1429	1.01891
LamPP	Atrium	1201	12.1571	1.46767
LamPP	Atrium	1202	12.1714	1.46684
LamPP	Atrium	1203	12.1857	1.4668
LamPP	Atrium	1204	12.2	1.4668
LamPP	Atrium	1205	12.2143	1.4668
LamPP	Atrium	1206	12.2286	1.4668
LamPP	Atrium	1207	12.2429	1.4668
LamPP	Atrium	1208	12.2571	1.07278
LamPP	Atrium	1209	12.2714	1.0723
LamPP	Atrium	1210	12.2857	1.07215
LamPP	Atrium	1211	12.3	1.07215
LamPP	Atrium	1212	12.3143	1.07215
LamPP	Atrium	1213	12.3286	1.07215
LamPP	Atrium	1214	12.3429	1.07215
LamPP	Atrium	1215	12.3571	1.35798
LamPP	Atrium	1216	12.3714	1.35759
LamPP	Atrium	1217	12.3857	1.35757
LamPP	Atrium	1218	12.4	1.35757
LamPP	Atrium	1219	12.4143	1.35757
LamPP	Atrium	1220	12.4286	1.35757
LamPP	Atrium	1221	12.4429	1.35757
LamPP	Atrium	1222	12.4571	1.35757
LamPP	Atrium	1223	12.4714	1.1734
LamPP	Atrium	1224	12.4857	1.17307
LamPP	Atrium	1225	12.5	1.173
LamPP	Atrium	1226	12.5143	1.17306
LamPP	Atrium	1227	12.5286	1.17304
LamPP	Atrium	1228	12.5429	1.17307
LamPP	Atrium	1229	12.5571	1.17304
LamPP	Atrium	1230	12.5714	1.18864
LamPP	Atrium	1231	12.5857	1.18832
LamPP	Atrium	1232	12.6	1.18822
LamPP	Atrium	1233	12.6143	1.18824
LamPP	Atrium	1234	12.6286	1.18824
LamPP	Atrium	1235	12.6429	1.18824
LamPP	Atrium	1236	12.6571	1.18824
LamPP	Atrium	1237	12.6714	1.30176
LamPP	Atrium	1238	12.6857	1.30112
LamPP	Atrium	1239	12.7	1.30098
LamPP	Atrium	1240	12.7143	1.30098
LamPP	Atrium	1241	12.7286	1.30098
LamPP	Atrium	1242	12.7429	1.30098
LamPP	Atrium	1243	12.7571	1.30098
LamPP	Atrium	1244	12.7714	1.07016
LamPP	Atrium	1245	12.7857	1.0699
LamPP	Atrium	1246	12.8	1.06982
LamPP	Atrium	1247	12.8143	1.06982
LamPP	Atrium	1248	12.8286	1.06982
LamPP	Atrium	1249	12.8429	1.06982
LamPP	Atrium	1250	12.8571	1.06982
LamPP	Atrium	1251	12.8714	1.40341
LamPP	Atrium	1252	12.8857	1.40284
LamPP	Atrium	1253	12.9	1.40284
LamPP	Atrium	1254	12.9143	1.40287
LamPP	Atrium	1255	12.9286	1.40291
LamPP	Atrium	1256	12.9429	1.40291
LamPP	Atrium	1257	12.9571	1.40291
LamPP	Atrium	1258	12.9714	0.996876
LamPP	Atrium	1259	12.9857	0.996552
LamPP	Atrium	1260	13	0.99654
LamPP	Atrium	1261	13.0143	0.99654
LamPP	Atrium	1262	13.0286	0.99654
LamPP	Atrium	1263	13.0429	0.99654
LamPP	Atrium	1264	13.0571	0.99654
LamPP	Atrium	1265	13.0714	1.43913
LamPP	Atrium	1266	13.0857	1.43858
LamPP	Atrium	1267	13.1	1.43852
LamPP	Atrium	1268	13.1143	1.4385
LamPP	Atrium	1269	13.1286	1.43849
LamPP	Atrium	1270	13.1429	1.43849
LamPP	Atrium	1271	13.1571	1.43849
LamPP	Atrium	1272	13.1714	1.0228
LamPP	Atrium	1273	13.1857	1.02228
LamPP	Atrium	1274	13.2	1.0223
LamPP	Atrium	1275	13.2143	1.0223
LamPP	Atrium	1276	13.2286	1.0223
LamPP	Atrium	1277	13.2429	1.0223
LamPP	Atrium	1278	13.2571	1.0223
LamPP	Atrium	1279	13.2714	1.3979
LamPP	Atrium	1280	13.2857	1.39732
LamPP	Atrium	1281	13.3	1.39731
LamPP	Atrium	1282	13.3143	1.39731
LamPP	Atrium	1283	13.3286	1.39732
LamPP	Atrium	1284	13.3429	1.39731
LamPP	Atrium	1285	13.3571	1.39731
LamPP	Atrium	1286	13.3714	1.09744
LamPP	Atrium	1287	13.3857	1.09695
LamPP	Atrium	1288	13.4	1.09682
LamPP	Atrium	1289	13.4143	1.09682
LamPP	Atrium	1290	13.4286	1.09685
LamPP	Atrium	1291	13.4429	1.09682
LamPP	Atrium	1292	13.4571	1.09682
LamPP	Atrium	1293	13.4714	1.26336
LamPP	Atrium	1294	13.4857	1.26312
LamPP	Atrium	1295	13.5	1.26305
LamPP	Atrium	1296	13.5143	1.26305
LamPP	Atrium	1297	13.5286	1.26305
LamPP	Atrium	1298	13.5429	1.26305
LamPP	Atrium	1299	13.5571	1.26305
LamPP	Atrium	1300	13.5714	1.19878
LamPP	Atrium	1301	13.5857	1.19809
LamPP	Atrium	1302	13.6	1.19806
LamPP	Atrium	1303	13.6143	1.19805
LamPP	Atrium	1304	13.6286	1.19805
LamPP	Atrium	1305	13.6429	1.19805
LamPP	Atrium	1306	13.6571	1.19805
LamPP	Atrium	1307	13.6714	1.11781
LamPP	Atrium	1308	13.6857	1.11744
LamPP	Atrium	1309	13.7	1.11744
LamPP	Atrium	1310	13.7143	1.11744
LamPP	Atrium	1311	13.7286	1.11744
LamPP	Atrium	1312	13.7429	1.11744
LamPP	Atrium	1313	13.7571	1.11744
LamPP	Atrium	1314	13.7714	1.30871
LamPP	Atrium	1315	13.7857	1.30845
LamPP	Atrium	1316	13.8	1.30834
LamPP	Atrium	1317	13.8143	1.30835
LamPP	Atrium	1318	13.8286	1.30929
LamPP	Atrium	1319	13.8429	1.30872
LamPP	Atrium	1320	13.8571	1.30875
LamPP	Atrium	1321	13.8714	1.02739
LamPP	Atrium	1322	13.8857	1.02712
LamPP	Atrium	1323	13.9	1.02709
LamPP	Atrium	1324	13.9143	1.02709
LamPP	Atrium	1325	13.9286	1.02709
LamPP	Atrium	1326	13.9429	1.02709
LamPP	Atrium	1327	13.9571	1.02709
LamPP	Atrium	1328	13.9714	1.36852
LamPP	Atrium	1329	13.9857	1.36765
LamPP	Atrium	1330	14	1.36757
LamPP	Atrium	1331	14.0143	1.36757
LamPP	Atrium	1332	14.0286	1.36757
LamPP	Atrium	1333	14.0429	1.36757
LamPP	Atrium	1334	14.0571	1.36757
LamPP	Atrium	1335	14.0714	0.970252
LamPP	Atrium	1336	14.0857	0.969736
LamPP	Atrium	1337	14.1	0.96972
LamPP	Atrium	1338	14.1143	0.96972
LamPP	Atrium	1339	14.1286	0.96972
LamPP	Atrium	1340	14.1429	0.96972
LamPP	Atrium	1341	14.1571	0.96972
LamPP	Atrium	1342	14.1714	1.39354
LamPP	Atrium	1343	14.1857	1.393
LamPP	Atrium	1344	14.2	1.39306
LamPP	Atrium	1345	14.2143	1.39303
LamPP	Atrium	1346	14.2286	1.39303
LamPP	Atrium	1347	14.2429	1.393
LamPP	Atrium	1348	14.2571	1.39303
LamPP	Atrium	1349	14.2714	0.990576
LamPP	Atrium	1350	14.2857	0.989972
LamPP	Atrium	1351	14.3	0.989844
LamPP	Atrium	1352	14.3143	0.989768
LamPP	Atrium	1353	14.3286	0.989768
LamPP	Atrium	1354	14.3429	0.989768
LamPP	Atrium	1355	14.3571	0.989768
LamPP	Atrium	1356	14.3714	1.34967
LamPP	Atrium	1357	14.3857	1.34912
LamPP	Atrium	1358	14.4	1.34899
LamPP	Atrium	1359	14.4143	1.34899
LamPP	Atrium	1360	14.4286	1.34897
LamPP	Atrium	1361	14.4429	1.34899
LamPP	Atrium	1362	14.4571	1.34897
LamPP	Atrium	1363	14.4714	1.05381
LamPP	Atrium	1364	14.4857	1.05352
LamPP	Atrium	1365	14.5	1.05345
LamPP	Atrium	1366	14.5143	1.05345
LamPP	Atrium	1367	14.5286	1.05345
LamPP	Atrium	1368	14.5429	1.05345
LamPP	Atrium	1369	14.5571	1.05345
LamPP	Atrium	1370	14.5714	1.24952
LamPP	Atrium	1371	14.5857	1.24906
LamPP	Atrium	1372	14.6	1.24906
LamPP	Atrium	1373	14.6143	1.24908
LamPP	Atrium	1374	14.6286	1.24906
LamPP	Atrium	1375	14.6429	1.24906
LamPP	Atrium	1376	14.6571	1.24906
LamPP	Atrium	1377	14.6714	1.1374
LamPP	Atrium	1378	14.6857	1.137
LamPP	Atrium	1379	14.7	1.13696
LamPP	Atrium	1380	14.7143	1.13694
LamPP	Atrium	1381	14.7286	1.13694
LamPP	Atrium	1382	14.7429	1.13694
LamPP	Atrium	1383	14.7571	1.13694
LamPP	Atrium	1384	14.7714	1.10493
LamPP	Atrium	1385	14.7857	1.1047
LamPP	Atrium	1386	14.8	1.10474
LamPP	Atrium	1387	14.8143	1.10472
LamPP	Atrium	1388	14.8286	1.10472
LamPP	Atrium	1389	14.8429	1.10472
LamPP	Atrium	1390	14.8571	1.10472
LamPP	Atrium	1391	14.8714	1.23394
LamPP	Atrium	1392	14.8857	1.2337
LamPP	Atrium	1393	14.9	1.23358
LamPP	Atrium	1394	14.9143	1.23358
LamPP	Atrium	1395	14.9286	1.23359
LamPP	Atrium	1396	14.9429	1.23359
LamPP	Atrium	1397	14.9571	1.23359
LamPP	Atrium	1398	14.9714	1.01315
LamPP	Atrium	1399	14.9857	1.01264
LamPP	Atrium	1400	15	1.01262
LamPP	Atrium	1401	15.0143	1.01262
LamPP	Atrium	1402	15.0286	1.01263
LamPP	Atrium	1403	15.0429	1.01263
LamPP	Atrium	1404	15.0571	1.01263
LamPP	Atrium	1405	15.0714	1.01263
LamPP	Atrium	1406	15.0857	1.29622
LamPP	Atrium	1407	15.1	1.29571
LamPP	Atrium	1408	15.1143	1.29571
LamPP	Atrium	1409	15.1286	1.29566
LamPP	Atrium	1410	15.1429	1.29566
LamPP	Atrium	1411	15.1571	1.29566
LamPP	Atrium	1412	15.1714	1.29566
LamPP	Atrium	1413	15.1857	0.941916
LamPP	Atrium	1414	15.2	0.941708
LamPP	Atrium	1415	15.2143	0.9417
LamPP	Atrium	1416	15.2286	0.941716
LamPP	Atrium	1417	15.2429	0.941716
LamPP	Atrium	1418	15.2571	0.941716
LamPP	Atrium	1419	15.2714	0.941716
LamPP	Atrium	1420	15.2857	1.33734
LamPP	Atrium	1421	15.3	1.33686
LamPP	Atrium	1422	15.3143	1.33683
LamPP	Atrium	1423	15.3286	1.33686
LamPP	Atrium	1424	15.3429	1.33686
LamPP	Atrium	1425	15.3571	1.33686
LamPP	Atrium	1426	15.3714	1.33686
LamPP	Atrium	1427	15.3857	0.934936
LamPP	Atrium	1428	15.4	0.934636
LamPP	Atrium	1429	15.4143	0.93462
LamPP	Atrium	1430	15.4286	0.934636
LamPP	Atrium	1431	15.4429	0.934636
LamPP	Atrium	1432	15.4571	0.934636
LamPP	Atrium	1433	15.4714	0.934636
LamPP	Atrium	1434	15.4857	1.33825
LamPP	Atrium	1435	15.5	1.33791
LamPP	Atrium	1436	15.5143	1.33787
LamPP	Atrium	1437	15.5286	1.33786
LamPP	Atrium	1438	15.5429	1.33786
LamPP	Atrium	1439	15.5571	1.33786
LamPP	Atrium	1440	15.5714	1.33786
LamPP	Atrium	1441	15.5857	0.969992
LamPP	Atrium	1442	15.6	0.969664
LamPP	Atrium	1443	15.6143	0.969632
LamPP	Atrium	1444	15.6286	0.969632
LamPP	Atrium	1445	15.6429	0.969632
LamPP	Atrium	1446	15.6571	0.969632
LamPP	Atrium	1447	15.6714	0.969632
LamPP	Atrium	1448	15.6857	1.26096
LamPP	Atrium	1449	15.7	1.26016
LamPP	Atrium	1450	15.7143	1.26014
LamPP	Atrium	1451	15.7286	1.26013
LamPP	Atrium	1452	15.7429	1.26013
LamPP	Atrium	1453	15.7571	1.26013
LamPP	Atrium	1454	15.7714	1.26013
LamPP	Atrium	1455	15.7857	1.04302
LamPP	Atrium	1456	15.8	1.0426
LamPP	Atrium	1457	15.8143	1.04256
LamPP	Atrium	1458	15.8286	1.04256
LamPP	Atrium	1459	15.8429	1.04256
LamPP	Atrium	1460	15.8571	1.04256
LamPP	Atrium	1461	15.8714	1.04256
LamPP	Atrium	1462	15.8857	1.13818
LamPP	Atrium	1463	15.9	1.13788
LamPP	Atrium	1464	15.9143	1.13785
LamPP	Atrium	1465	15.9286	1.13785
LamPP	Atrium	1466	15.9429	1.13786
LamPP	Atrium	1467	15.9571	1.13786
LamPP	Atrium	1468	15.9714	1.13786
LamPP	Atrium	1469	15.9857	1.15637
LamPP	Atrium	1470	16	1.15605
LamPP	Atrium	1471	16.0143	1.15602
LamPP	Atrium	1472	16.0286	1.15602
LamPP	Atrium	1473	16.0429	1.15599
LamPP	Atrium	1474	16.0571	1.15602
LamPP	Atrium	1475	16.0714	1.15599
LamPP	Atrium	1476	16.0857	1.01643
LamPP	Atrium	1477	16.1	1.01636
LamPP	Atrium	1478	16.1143	1.01631
LamPP	Atrium	1479	16.1286	1.01631
LamPP	Atrium	1480	16.1429	1.01631
LamPP	Atrium	1481	16.1571	1.01631
LamPP	Atrium	1482	16.1714	1.01631
LamPP	Atrium	1483	16.1857	1.24324
LamPP	Atrium	1484	16.2	1.24268
LamPP	Atrium	1485	16.2143	1.24263
LamPP	Atrium	1486	16.2286	1.2426
LamPP	Atrium	1487	16.2429	1.24261
LamPP	Atrium	1488	16.2571	1.24258
LamPP	Atrium	1489	16.2714	1.24261
LamPP	Atrium	1490	16.2857	0.948844
LamPP	Atrium	1491	16.3	0.948496
LamPP	Atrium	1492	16.3143	0.948484
LamPP	Atrium	1493	16.3286	0.948484
LamPP	Atrium	1494	16.3429	0.948484
LamPP	Atrium	1495	16.3571	0.948484
LamPP	Atrium	1496	16.3714	0.948484
LamPP	Atrium	1497	16.3857	1.29138
LamPP	Atrium	1498	16.4	1.29064
LamPP	Atrium	1499	16.4143	1.29049
LamPP	Atrium	1500	16.4286	1.2905
LamPP	Atrium	1501	16.4429	1.2905
LamPP	Atrium	1502	16.4571	1.2905
LamPP	Atrium	1503	16.4714	1.2905
LamPP	Atrium	1504	16.4857	0.902148
LamPP	Atrium	1505	16.5	0.902024
LamPP	Atrium	1506	16.5143	0.901976
LamPP	Atrium	1507	16.5286	0.901976
LamPP	Atrium	1508	16.5429	0.901976
LamPP	Atrium	1509	16.5571	0.901976
LamPP	Atrium	1510	16.5714	0.901976
LamPP	Atrium	1511	16.5857	1.31864
LamPP	Atrium	1512	16.6	1.31812
LamPP	Atrium	1513	16.6143	1.31808
LamPP	Atrium	1514	16.6286	1.31812
LamPP	Atrium	1515	16.6429	1.31808
LamPP	Atrium	1516	16.6571	1.31808
LamPP	Atrium	1517	16.6714	1.31808
LamPP	Atrium	1518	16.6857	0.91688
LamPP	Atrium	1519	16.7	0.916472
LamPP	Atrium	1520	16.7143	0.916412
LamPP	Atrium	1521	16.7286	0.916428
LamPP	Atrium	1522	16.7429	0.916412
LamPP	Atrium	1523	16.7571	0.916428
LamPP	Atrium	1524	16.7714	0.916412
LamPP	Atrium	1525	16.7857	1.29661
LamPP	Atrium	1526	16.8	1.296
LamPP	Atrium	1527	16.8143	1.296
LamPP	Atrium	1528	16.8286	1.296
LamPP	Atrium	1529	16.8429	1.296
LamPP	Atrium	1530	16.8571	1.296
LamPP	Atrium	1531	16.8714	1.296
LamPP	Atrium	1532	16.8857	0.98336
LamPP	Atrium	1533	16.9	0.983036
LamPP	Atrium	1534	16.9143	0.982988
LamPP	Atrium	1535	16.9286	0.982988
LamPP	Atrium	1536	16.9429	0.982988
LamPP	Atrium	1537	16.9571	0.982988
LamPP	Atrium	1538	16.9714	0.982988
LamPP	Atrium	1539	16.9857	1.19461
LamPP	Atrium	1540	17	1.19417
LamPP	Atrium	1541	17.0143	1.19416
LamPP	Atrium	1542	17.0286	1.19417
LamPP	Atrium	1543	17.0429	1.19417
LamPP	Atrium	1544	17.0571	1.19416
LamPP	Atrium	1545	17.0714	1.19417
LamPP	Atrium	1546	17.0857	1.03559
LamPP	Atrium	1547	17.1	1.03483
LamPP	Atrium	1548	17.1143	1.03483
LamPP	Atrium	1549	17.1286	1.03483
LamPP	Atrium	1550	17.1429	1.03483
LamPP	Atrium	1551	17.1571	1.03483
LamPP	Atrium	1552	17.1714	1.03483
LamPP	Atrium	1553	17.1857	1.08295
LamPP	Atrium	1554	17.2	1.08277
LamPP	Atrium	1555	17.2143	1.0828
LamPP	Atrium	1556	17.2286	1.0828
LamPP	Atrium	1557	17.2429	1.0828
LamPP	Atrium	1558	17.2571	1.0828
LamPP	Atrium	1559	17.2714	1.0828
LamPP	Atrium	1560	17.2857	1.10795
LamPP	Atrium	1561	17.3	1.10756
LamPP	Atrium	1562	17.3143	1.10751
LamPP	Atrium	1563	17.3286	1.10753
LamPP	Atrium	1564	17.3429	1.1075
LamPP	Atrium	1565	17.3571	1.10754
LamPP	Atrium	1566	17.3714	1.10751
LamPP	Atrium	1567	17.3857	0.989268
LamPP	Atrium	1568	17.4	0.98944
LamPP	Atrium	1569	17.4143	0.989164
LamPP	Atrium	1570	17.4286	0.989104
LamPP	Atrium	1571	17.4429	0.989104
LamPP	Atrium	1572	17.4571	0.989104
LamPP	Atrium	1573	17.4714	0.989104
LamPP	Atrium	1574	17.4857	0.989104
LamPP	Atrium	1575	17.5	1.19228
LamPP	Atrium	1576	17.5143	1.19201
LamPP	Atrium	1577	17.5286	1.19198
LamPP	Atrium	1578	17.5429	1.19198
LamPP	Atrium	1579	17.5571	1.19198
LamPP	Atrium	1580	17.5714	1.19198
LamPP	Atrium	1581	17.5857	1.19198
LamPP	Atrium	1582	17.6	0.903892
LamPP	Atrium	1583	17.6143	0.903504
LamPP	Atrium	1584	17.6286	0.90346
LamPP	Atrium	1585	17.6429	0.903492
LamPP	Atrium	1586	17.6571	0.903492
LamPP	Atrium	1587	17.6714	0.903492
LamPP	Atrium	1588	17.6857	0.90346
LamPP	Atrium	1589	17.7	1.25147
LamPP	Atrium	1590	17.7143	1.25106
LamPP	Atrium	1591	17.7286	1.25097
LamPP	Atrium	1592	17.7429	1.25097
LamPP	Atrium	1593	17.7571	1.25097
LamPP	Atrium	1594	17.7714	1.25097
LamPP	Atrium	1595	17.7857	1.25097
LamPP	Atrium	1596	17.8	0.861404
LamPP	Atrium	1597	17.8143	0.86098
LamPP	Atrium	1598	17.8286	0.860964
LamPP	Atrium	1599	17.8429	0.860964
LamPP	Atrium	1600	17.8571	0.860964
LamPP	Atrium	1601	17.8714	0.860964
LamPP	Atrium	1602	17.8857	0.860964
LamPP	Atrium	1603	17.9	1.27682
LamPP	Atrium	1604	17.9143	1.27646
LamPP	Atrium	1605	17.9286	1.27642
LamPP	Atrium	1606	17.9429	1.27642
LamPP	Atrium	1607	17.9571	1.27642
LamPP	Atrium	1608	17.9714	1.27642
LamPP	Atrium	1609	17.9857	1.27642
LamPP	Atrium	1610	18	0.862544
LamPP	Atrium	1611	18.0143	0.862148
LamPP	Atrium	1612	18.0286	0.86208
LamPP	Atrium	1613	18.0429	0.86208
LamPP	Atrium	1614	18.0571	0.86208
LamPP	Atrium	1615	18.0714	0.86208
LamPP	Atrium	1616	18.0857	0.86208
LamPP	Atrium	1617	18.1	1.25891
LamPP	Atrium	1618	18.1143	1.25866
LamPP	Atrium	1619	18.1286	1.25868
LamPP	Atrium	1620	18.1429	1.25868
LamPP	Atrium	1621	18.1571	1.25868
LamPP	Atrium	1622	18.1714	1.25868
LamPP	Atrium	1623	18.1857	1.25868
LamPP	Atrium	1624	18.2	0.903244
LamPP	Atrium	1625	18.2143	0.902636
LamPP	Atrium	1626	18.2286	0.902604
LamPP	Atrium	1627	18.2429	0.902528
LamPP	Atrium	1628	18.2571	0.902544
LamPP	Atrium	1629	18.2714	0.902544
LamPP	Atrium	1630	18.2857	0.902556
LamPP	Atrium	1631	18.3	1.18485
LamPP	Atrium	1632	18.3143	1.18452
LamPP	Atrium	1633	18.3286	1.1845
LamPP	Atrium	1634	18.3429	1.1845
LamPP	Atrium	1635	18.3571	1.1845
LamPP	Atrium	1636	18.3714	1.1845
LamPP	Atrium	1637	18.3857	1.1845
LamPP	Atrium	1638	18.4	0.953456
LamPP	Atrium	1639	18.4143	0.953084
LamPP	Atrium	1640	18.4286	0.953084
LamPP	Atrium	1641	18.4429	0.953084
LamPP	Atrium	1642	18.4571	0.953084
LamPP	Atrium	1643	18.4714	0.953084
LamPP	Atrium	1644	18.4857	0.953084
LamPP	Atrium	1645	18.5	1.08331
LamPP	Atrium	1646	18.5143	1.08281
LamPP	Atrium	1647	18.5286	1.08276
LamPP	Atrium	1648	18.5429	1.08276
LamPP	Atrium	1649	18.5571	1.08276
LamPP	Atrium	1650	18.5714	1.08276
LamPP	Atrium	1651	18.5857	1.08276
LamPP	Atrium	1652	18.6	1.0296
LamPP	Atrium	1653	18.6143	1.02911
LamPP	Atrium	1654	18.6286	1.0291
LamPP	Atrium	1655	18.6429	1.0291
LamPP	Atrium	1656	18.6571	1.0291
LamPP	Atrium	1657	18.6714	1.0291
LamPP	Atrium	1658	18.6857	1.0291
LamPP	Atrium	1659	18.7	0.976476
LamPP	Atrium	1660	18.7143	0.976072
LamPP	Atrium	1661	18.7286	0.976024
LamPP	Atrium	1662	18.7429	0.976024
LamPP	Atrium	1663	18.7571	0.976024
LamPP	Atrium	1664	18.7714	0.976024
LamPP	Atrium	1665	18.7857	0.976024
LamPP	Atrium	1666	18.8	1.1198
LamPP	Atrium	1667	18.8143	1.11968
LamPP	Atrium	1668	18.8286	1.11968
LamPP	Atrium	1669	18.8429	1.11967
LamPP	Atrium	1670	18.8571	1.11967
LamPP	Atrium	1671	18.8714	1.11967
LamPP	Atrium	1672	18.8857	1.11967
LamPP	Atrium	1673	18.9	0.895472
LamPP	Atrium	1674	18.9143	0.894964
LamPP	Atrium	1675	18.9286	0.8949
LamPP	Atrium	1676	18.9429	0.8949
LamPP	Atrium	1677	18.9571	0.8949
LamPP	Atrium	1678	18.9714	0.8949
LamPP	Atrium	1679	18.9857	0.894916
LamPP	Atrium	1680	19	1.19399
LamPP	Atrium	1681	19.0143	1.19366
LamPP	Atrium	1682	19.0286	1.19362
LamPP	Atrium	1683	19.0429	1.1936
LamPP	Atrium	1684	19.0571	1.1936
LamPP	Atrium	1685	19.0714	1.1936
LamPP	Atrium	1686	19.0857	1.1936
LamPP	Atrium	1687	19.1	0.837632
LamPP	Atrium	1688	19.1143	0.837596
LamPP	Atrium	1689	19.1286	0.837524
LamPP	Atrium	1690	19.1429	0.837524
LamPP	Atrium	1691	19.1571	0.837524
LamPP	Atrium	1692	19.1714	0.837524
LamPP	Atrium	1693	19.1857	0.837524
LamPP	Ventricle	0	-5	0
LamPP	Ventricle	1	-4.98571	0
LamPP	Ventricle	2	-4.97143	0
LamPP	Ventricle	3	-4.95714	0
LamPP	Ventricle	4	-4.94286	0
LamPP	Ventricle	5	-4.92857	0
LamPP	Ventricle	6	-4.91429	0
LamPP	Ventricle	7	-4.9	0
LamPP	Ventricle	8	-4.88571	0
LamPP	Ventricle	9	-4.87143	0
LamPP	Ventricle	10	-4.85714	0
LamPP	Ventricle	11	-4.84286	0
LamPP	Ventricle	12	-4.82857	0
LamPP	Ventricle	13	-4.81429	0
LamPP	Ventricle	14	-4.8	0
LamPP	Ventricle	15	-4.78571	0
LamPP	Ventricle	16	-4.77143	0
LamPP	Ventricle	17	-4.75714	0
LamPP	Ventricle	18	-4.74286	0
LamPP	Ventricle	19	-4.72857	0
LamPP	Ventricle	20	-4.71429	0
LamPP	Ventricle	21	-4.7	0
LamPP	Ventricle	22	-4.68571	0
LamPP	Ventricle	23	-4.67143	0
LamPP	Ventricle	24	-4.65714	0
LamPP	Ventricle	25	-4.64286	0
LamPP	Ventricle	26	-4.62857	0
LamPP	Ventricle	27	-4.61429	0
LamPP	Ventricle	28	-4.6	0
LamPP	Ventricle	29	-4.58571	0
LamPP	Ventricle	30	-4.57143	0
LamPP	Ventricle	31	-4.55714	0
LamPP	Ventricle	32	-4.54286	0
LamPP	Ventricle	33	-4.52857	0
LamPP	Ventricle	34	-4.51429	0
LamPP	Ventricle	35	-4.5	0
LamPP	Ventricle	36	-4.48571	0
LamPP	Ventricle	37	-4.47143	0
LamPP	Ventricle	38	-4.45714	0
LamPP	Ventricle	39	-4.44286	0
LamPP	Ventricle	40	-4.42857	0
LamPP	Ventricle	41	-4.41429	0
LamPP	Ventricle	42	-4.4	0
LamPP	Ventricle	43	-4.38571	0
LamPP	Ventricle	44	-4.37143	0
LamPP	Ventricle	45	-4.35714	0
LamPP	Ventricle	46	-4.34286	0
LamPP	Ventricle	47	-4.32857	0
LamPP	Ventricle	48	-4.31429	0
LamPP	Ventricle	49	-4.3	0
LamPP	Ventricle	50	-4.28571	0
LamPP	Ventricle	51	-4.27143	0
LamPP	Ventricle	52	-4.25714	0
LamPP	Ventricle	53	-4.24286	0
LamPP	Ventricle	54	-4.22857	0
LamPP	Ventricle	55	-4.21429	0
LamPP	Ventricle	56	-4.2	0
LamPP	Ventricle	57	-4.18571	0
LamPP	Ventricle	58	-4.17143	0
LamPP	Ventricle	59	-4.15714	0
LamPP	Ventricle	60	-4.14286	0
LamPP	Ventricle	61	-4.12857	0
LamPP	Ventricle	62	-4.11429	0
LamPP	Ventricle	63	-4.1	0
LamPP	Ventricle	64	-4.08571	0
LamPP	Ventricle	65	-4.07143	0
LamPP	Ventricle	66	-4.05714	0
LamPP	Ventricle	67	-4.04286	0
LamPP	Ventricle	68	-4.02857	0
LamPP	Ventricle	69	-4.01429	0
LamPP	Ventricle	70	-4	0
LamPP	Ventricle	71	-3.98571	0
LamPP	Ventricle	72	-3.97143	0
LamPP	Ventricle	73	-3.95714	0
LamPP	Ventricle	74	-3.94286	0
LamPP	Ventricle	75	-3.92857	0
LamPP	Ventricle	76	-3.91429	0
LamPP	Ventricle	77	-3.9	0
LamPP	Ventricle	78	-3.88571	0
LamPP	Ventricle	79	-3.87143	0
LamPP	Ventricle	80	-3.85714	0
LamPP	Ventricle	81	-3.84286	0
LamPP	Ventricle	82	-3.82857	0
LamPP	Ventricle	83	-3.81429	0
LamPP	Ventricle	84	-3.8	0
LamPP	Ventricle	85	-3.78571	0
LamPP	Ventricle	86	-3.77143	0
LamPP	Ventricle	87	-3.75714	0
LamPP	Ventricle	88	-3.74286	0
LamPP	Ventricle	89	-3.72857	0
LamPP	Ventricle	90	-3.71429	0
LamPP	Ventricle	91	-3.7	0
LamPP	Ventricle	92	-3.68571	0
LamPP	Ventricle	93	-3.67143	0
LamPP	Ventricle	94	-3.65714	0
LamPP	Ventricle	95	-3.64286	0
LamPP	Ventricle	96	-3.62857	0
LamPP	Ventricle	97	-3.61429	0
LamPP	Ventricle	98	-3.6	0
LamPP	Ventricle	99	-3.58571	0
LamPP	Ventricle	100	-3.57143	0
LamPP	Ventricle	101	-3.55714	0
LamPP	Ventricle	102	-3.54286	0
LamPP	Ventricle	103	-3.52857	0
LamPP	Ventricle	104	-3.51429	0
LamPP	Ventricle	105	-3.5	0
LamPP	Ventricle	106	-3.48571	0
LamPP	Ventricle	107	-3.47143	0
LamPP	Ventricle	108	-3.45714	0
LamPP	Ventricle	109	-3.44286	0
LamPP	Ventricle	110	-3.42857	0
LamPP	Ventricle	111	-3.41429	0
LamPP	Ventricle	112	-3.4	0
LamPP	Ventricle	113	-3.38571	0
LamPP	Ventricle	114	-3.37143	0
LamPP	Ventricle	115	-3.35714	0
LamPP	Ventricle	116	-3.34286	0
LamPP	Ventricle	117	-3.32857	0
LamPP	Ventricle	118	-3.31429	0
LamPP	Ventricle	119	-3.3	0
LamPP	Ventricle	120	-3.28571	0
LamPP	Ventricle	121	-3.27143	0
LamPP	Ventricle	122	-3.25714	0
LamPP	Ventricle	123	-3.24286	0
LamPP	Ventricle	124	-3.22857	0
LamPP	Ventricle	125	-3.21429	0
LamPP	Ventricle	126	-3.2	0
LamPP	Ventricle	127	-3.18571	0
LamPP	Ventricle	128	-3.17143	0
LamPP	Ventricle	129	-3.15714	0
LamPP	Ventricle	130	-3.14286	0
LamPP	Ventricle	131	-3.12857	0
LamPP	Ventricle	132	-3.11429	0
LamPP	Ventricle	133	-3.1	0
LamPP	Ventricle	134	-3.08571	0
LamPP	Ventricle	135	-3.07143	0
LamPP	Ventricle	136	-3.05714	0
LamPP	Ventricle	137	-3.04286	0
LamPP	Ventricle	138	-3.02857	0
LamPP	Ventricle	139	-3.01429	0
LamPP	Ventricle	140	-3	0
LamPP	Ventricle	141	-2.98571	0
LamPP	Ventricle	142	-2.97143	0
LamPP	Ventricle	143	-2.95714	0
LamPP	Ventricle	144	-2.94286	0
LamPP	Ventricle	145	-2.92857	0
LamPP	Ventricle	146	-2.91429	0
LamPP	Ventricle	147	-2.9	0
LamPP	Ventricle	148	-2.88571	0
LamPP	Ventricle	149	-2.87143	0
LamPP	Ventricle	150	-2.85714	0
LamPP	Ventricle	151	-2.84286	0
LamPP	Ventricle	152	-2.82857	0
LamPP	Ventricle	153	-2.81429	0
LamPP	Ventricle	154	-2.8	0
LamPP	Ventricle	155	-2.78571	0
LamPP	Ventricle	156	-2.77143	0
LamPP	Ventricle	157	-2.75714	0
LamPP	Ventricle	158	-2.74286	0
LamPP	Ventricle	159	-2.72857	0
LamPP	Ventricle	160	-2.71429	0
LamPP	Ventricle	161	-2.7	0
LamPP	Ventricle	162	-2.68571	0
LamPP	Ventricle	163	-2.67143	0
LamPP	Ventricle	164	-2.65714	0
LamPP	Ventricle	165	-2.64286	0
LamPP	Ventricle	166	-2.62857	0
LamPP	Ventricle	167	-2.61429	0
LamPP	Ventricle	168	-2.6	0
LamPP	Ventricle	169	-2.58571	0
LamPP	Ventricle	170	-2.57143	0
LamPP	Ventricle	171	-2.55714	0
LamPP	Ventricle	172	-2.54286	0
LamPP	Ventricle	173	-2.52857	0
LamPP	Ventricle	174	-2.51429	0
LamPP	Ventricle	175	-2.5	0
LamPP	Ventricle	176	-2.48571	0
LamPP	Ventricle	177	-2.47143	0
LamPP	Ventricle	178	-2.45714	0
LamPP	Ventricle	179	-2.44286	0
LamPP	Ventricle	180	-2.42857	0
LamPP	Ventricle	181	-2.41429	0
LamPP	Ventricle	182	-2.4	0
LamPP	Ventricle	183	-2.38571	0
LamPP	Ventricle	184	-2.37143	0
LamPP	Ventricle	185	-2.35714	0
LamPP	Ventricle	186	-2.34286	0
LamPP	Ventricle	187	-2.32857	0
LamPP	Ventricle	188	-2.31429	0
LamPP	Ventricle	189	-2.3	0
LamPP	Ventricle	190	-2.28571	0
LamPP	Ventricle	191	-2.27143	0
LamPP	Ventricle	192	-2.25714	0
LamPP	Ventricle	193	-2.24286	0
LamPP	Ventricle	194	-2.22857	0
LamPP	Ventricle	195	-2.21429	0
LamPP	Ventricle	196	-2.2	0
LamPP	Ventricle	197	-2.18571	0
LamPP	Ventricle	198	-2.17143	0
LamPP	Ventricle	199	-2.15714	0
LamPP	Ventricle	200	-2.14286	0
LamPP	Ventricle	201	-2.12857	0
LamPP	Ventricle	202	-2.11429	0
LamPP	Ventricle	203	-2.1	0
LamPP	Ventricle	204	-2.08571	0
LamPP	Ventricle	205	-2.07143	0
LamPP	Ventricle	206	-2.05714	0
LamPP	Ventricle	207	-2.04286	0
LamPP	Ventricle	208	-2.02857	0
LamPP	Ventricle	209	-2.01429	0
LamPP	Ventricle	210	-2	0
LamPP	Ventricle	211	-1.98571	0
LamPP	Ventricle	212	-1.97143	0
LamPP	Ventricle	213	-1.95714	0
LamPP	Ventricle	214	-1.94286	0
LamPP	Ventricle	215	-1.92857	0
LamPP	Ventricle	216	-1.91429	0
LamPP	Ventricle	217	-1.9	0
LamPP	Ventricle	218	-1.88571	0
LamPP	Ventricle	219	-1.87143	0
LamPP	Ventricle	220	-1.85714	0
LamPP	Ventricle	221	-1.84286	0
LamPP	Ventricle	222	-1.82857	0
LamPP	Ventricle	223	-1.81429	0
LamPP	Ventricle	224	-1.8	0
LamPP	Ventricle	225	-1.78571	0
LamPP	Ventricle	226	-1.77143	0
LamPP	Ventricle	227	-1.75714	0
LamPP	Ventricle	228	-1.74286	0
LamPP	Ventricle	229	-1.72857	0
LamPP	Ventricle	230	-1.71429	0
LamPP	Ventricle	231	-1.7	0
LamPP	Ventricle	232	-1.68571	0
LamPP	Ventricle	233	-1.67143	0
LamPP	Ventricle	234	-1.65714	0
LamPP	Ventricle	235	-1.64286	0
LamPP	Ventricle	236	-1.62857	0
LamPP	Ventricle	237	-1.61429	0
LamPP	Ventricle	238	-1.6	0
LamPP	Ventricle	239	-1.58571	0
LamPP	Ventricle	240	-1.57143	0
LamPP	Ventricle	241	-1.55714	0
LamPP	Ventricle	242	-1.54286	0
LamPP	Ventricle	243	-1.52857	0
LamPP	Ventricle	244	-1.51429	0
LamPP	Ventricle	245	-1.5	0
LamPP	Ventricle	246	-1.48571	0
LamPP	Ventricle	247	-1.47143	0
LamPP	Ventricle	248	-1.45714	0
LamPP	Ventricle	249	-1.44286	0
LamPP	Ventricle	250	-1.42857	0
LamPP	Ventricle	251	-1.41429	0
LamPP	Ventricle	252	-1.4	0
LamPP	Ventricle	253	-1.38571	0
LamPP	Ventricle	254	-1.37143	0
LamPP	Ventricle	255	-1.35714	0
LamPP	Ventricle	256	-1.34286	0
LamPP	Ventricle	257	-1.32857	0
LamPP	Ventricle	258	-1.31429	0
LamPP	Ventricle	259	-1.3	0
LamPP	Ventricle	260	-1.28571	0
LamPP	Ventricle	261	-1.27143	0
LamPP	Ventricle	262	-1.25714	0
LamPP	Ventricle	263	-1.24286	0
LamPP	Ventricle	264	-1.22857	0
LamPP	Ventricle	265	-1.21429	0
LamPP	Ventricle	266	-1.2	0
LamPP	Ventricle	267	-1.18571	0
LamPP	Ventricle	268	-1.17143	0
LamPP	Ventricle	269	-1.15714	0
LamPP	Ventricle	270	-1.14286	0
LamPP	Ventricle	271	-1.12857	0
LamPP	Ventricle	272	-1.11429	0
LamPP	Ventricle	273	-1.1	0
LamPP	Ventricle	274	-1.08571	0
LamPP	Ventricle	275	-1.07143	0
LamPP	Ventricle	276	-1.05714	0
LamPP	Ventricle	277	-1.04286	0
LamPP	Ventricle	278	-1.02857	0
LamPP	Ventricle	279	-1.01429	0
LamPP	Ventricle	280	-1	0
LamPP	Ventricle	281	-0.985714	0
LamPP	Ventricle	282	-0.971429	0
LamPP	Ventricle	283	-0.957143	0
LamPP	Ventricle	284	-0.942857	0
LamPP	Ventricle	285	-0.928571	0
LamPP	Ventricle	286	-0.914286	0
LamPP	Ventricle	287	-0.9	0
LamPP	Ventricle	288	-0.885714	0
LamPP	Ventricle	289	-0.871429	0
LamPP	Ventricle	290	-0.857143	0
LamPP	Ventricle	291	-0.842857	0
LamPP	Ventricle	292	-0.828571	0
LamPP	Ventricle	293	-0.814286	0
LamPP	Ventricle	294	-0.8	0
LamPP	Ventricle	295	-0.785714	0
LamPP	Ventricle	296	-0.771429	0
LamPP	Ventricle	297	-0.757143	0
LamPP	Ventricle	298	-0.742857	0
LamPP	Ventricle	299	-0.728571	0
LamPP	Ventricle	300	-0.714286	0
LamPP	Ventricle	301	-0.7	0
LamPP	Ventricle	302	-0.685714	0
LamPP	Ventricle	303	-0.671429	0
LamPP	Ventricle	304	-0.657143	0
[truncated: 1,389 more rows]
