# Supplementary material for: Optogenetic manipulation of Gq- and Gi/o-coupled receptor signaling in neurons and heart muscle cells
Source: eLife. 2023 Aug 17;12:e83974. doi: 10.7554/eLife.83974 (PMC10435233; doi:10.7554/eLife.83974)
Supplement: Figure 6—source data 1. [file elife-83974-fig6-data1.xlsx]

## Sheet: B
Line	PTX or Control	Sample_number	Trial	Arrest time ratio
MosOpn3	PTX	1	1	1
MosOpn3	PTX	1	2	1.04814
MosOpn3	PTX	1	3	0.976659
MosOpn3	PTX	1	4	0.15609
MosOpn3	PTX	1	5	0.133479
MosOpn3	PTX	1	6	0.194019
MosOpn3	PTX	2	1	1
MosOpn3	PTX	2	2	0.626761
MosOpn3	PTX	2	3	0.824824
MosOpn3	PTX	2	4	0
MosOpn3	PTX	2	5	0.110915
MosOpn3	PTX	2	6	0.165493
MosOpn3	PTX	3	1	1
MosOpn3	PTX	3	2	1.20358
MosOpn3	PTX	3	3	1.2557
MosOpn3	PTX	3	4	0
MosOpn3	PTX	3	5	0
MosOpn3	PTX	3	6	0
MosOpn3	PTX	4	1	1
MosOpn3	PTX	4	2	0.90216
MosOpn3	PTX	4	3	0.88183
MosOpn3	PTX	4	4	0
MosOpn3	PTX	4	5	0
MosOpn3	PTX	4	6	0
MosOpn3	Control	1	1	1
MosOpn3	Control	1	2	0.990877
MosOpn3	Control	1	3	0.809123
MosOpn3	Control	1	4	0.54386
MosOpn3	Control	1	5	0.192982
MosOpn3	Control	1	6	0.236491
MosOpn3	Control	2	1	1
MosOpn3	Control	2	2	1.2179
MosOpn3	Control	2	3	1.10506
MosOpn3	Control	2	4	0.447471
MosOpn3	Control	2	5	0.330739
MosOpn3	Control	2	6	1.66537
MosOpn3	Control	3	1	1
MosOpn3	Control	3	2	0.726787
MosOpn3	Control	3	3	0.658651
MosOpn3	Control	3	4	0.194723
MosOpn3	Control	3	5	0.174015
MosOpn3	Control	3	6	0.190715
MosOpn3	Control	4	1	1
MosOpn3	Control	4	2	1.04092
MosOpn3	Control	4	3	1.18416
MosOpn3	Control	4	4	0.0442244
MosOpn3	Control	4	5	0.40066
MosOpn3	Control	4	6	0.252145

## Sheet: C
Line	PTX or Control	Sample_number	Trial	Arrest time ratio
PufTMT	PTX	1	1	1
PufTMT	PTX	1	2	1.13483
PufTMT	PTX	1	3	0.640449
PufTMT	PTX	1	4	0.134831
PufTMT	PTX	1	5	0
PufTMT	PTX	1	6	0
PufTMT	PTX	2	1	1
PufTMT	PTX	2	2	0.188811
PufTMT	PTX	2	3	0.117483
PufTMT	PTX	2	4	0
PufTMT	PTX	2	5	0
PufTMT	PTX	2	6	0
PufTMT	PTX	3	1	1
PufTMT	PTX	3	2	0.490843
PufTMT	PTX	3	3	0.523501
PufTMT	PTX	3	4	0
PufTMT	PTX	3	5	0
PufTMT	PTX	3	6	0
PufTMT	PTX	4	1	1
PufTMT	PTX	4	2	0.781778
PufTMT	PTX	4	3	0.803821
PufTMT	PTX	4	4	0
PufTMT	PTX	4	5	0
PufTMT	PTX	4	6	0
PufTMT	Control	1	1	1
PufTMT	Control	1	2	0.700167
PufTMT	Control	1	3	0.551225
PufTMT	Control	1	4	0.230234
PufTMT	Control	1	5	0.383074
PufTMT	Control	1	6	0.22745
PufTMT	Control	2	1	1
PufTMT	Control	2	2	0.613622
PufTMT	Control	2	3	0.489921
PufTMT	Control	2	4	0.174099
PufTMT	Control	2	5	0.0852169
PufTMT	Control	2	6	0
PufTMT	Control	3	1	1
PufTMT	Control	3	2	0.722081
PufTMT	Control	3	3	0.480965
PufTMT	Control	3	4	0.253807
PufTMT	Control	3	5	0.190355
PufTMT	Control	3	6	0.126904
PufTMT	Control	4	1	1
PufTMT	Control	4	2	1.04628
PufTMT	Control	4	3	0.949698
PufTMT	Control	4	4	0.287726
PufTMT	Control	4	5	0.134809
PufTMT	Control	4	6	0.247485

## Sheet: D
Line	PTX or Control	Sample_number	Trial	Arrest time ratio
LamPP	PTX	1	1	1
LamPP	PTX	1	2	0.0310391
LamPP	PTX	1	3	0.540261
LamPP	PTX	1	4	0.0355376
LamPP	PTX	1	5	0
LamPP	PTX	1	6	0
LamPP	PTX	2	1	1
LamPP	PTX	2	2	0.79248
LamPP	PTX	2	3	0.427382
LamPP	PTX	2	4	0.163605
LamPP	PTX	2	5	0
LamPP	PTX	2	6	0
LamPP	PTX	3	1	1
LamPP	PTX	3	2	0.976554
LamPP	PTX	3	3	0.21176
LamPP	PTX	3	4	0.0513584
LamPP	PTX	3	5	0
LamPP	PTX	3	6	0
LamPP	PTX	4	1	1
LamPP	PTX	4	2	0.544563
LamPP	PTX	4	3	0.312085
LamPP	PTX	4	4	0.102394
LamPP	PTX	4	5	0.0559562
LamPP	PTX	4	6	0
LamPP	Control	1	1	1
LamPP	Control	1	2	0.339583
LamPP	Control	1	3	0.563988
LamPP	Control	1	4	0.66369
LamPP	Control	1	5	0.052381
LamPP	Control	1	6	0.0497024
LamPP	Control	2	1	1
LamPP	Control	2	2	0.603136
LamPP	Control	2	3	0.845597
LamPP	Control	2	4	0.439083
LamPP	Control	2	5	0.055187
LamPP	Control	2	6	0
LamPP	Control	3	1	1
LamPP	Control	3	2	0.69697
LamPP	Control	3	3	0.491342
LamPP	Control	3	4	0.501443
LamPP	Control	3	5	0.145022
LamPP	Control	3	6	0.112554
LamPP	Control	4	1	1
LamPP	Control	4	2	1.85446
LamPP	Control	4	3	2.05743
LamPP	Control	4	4	1.00198
LamPP	Control	4	5	0.363366
LamPP	Control	4	6	0.60099

## Sheet: F
Line	BaCl2 or Control	Sample_number	Trial	Arrest time ratio
MosOpn3	BaCl2	1	1	1
MosOpn3	BaCl2	1	2	0.892823
MosOpn3	BaCl2	1	3	0.614644
MosOpn3	BaCl2	1	4	0.500241
MosOpn3	BaCl2	1	5	0.130299
MosOpn3	BaCl2	2	1	1
MosOpn3	BaCl2	2	2	0.790036
MosOpn3	BaCl2	2	3	0.0266904
MosOpn3	BaCl2	2	4	0
MosOpn3	BaCl2	2	5	0
MosOpn3	BaCl2	3	1	1
MosOpn3	BaCl2	3	2	1.12776
MosOpn3	BaCl2	3	3	0.728501
MosOpn3	BaCl2	3	4	0
MosOpn3	BaCl2	3	5	0
MosOpn3	BaCl2	4	1	1
MosOpn3	BaCl2	4	2	1.42985
MosOpn3	BaCl2	4	3	0
MosOpn3	BaCl2	4	4	0
MosOpn3	BaCl2	4	5	0
MosOpn3	Control	1	1	1
MosOpn3	Control	1	2	1.01837
MosOpn3	Control	1	3	0.942484
MosOpn3	Control	1	4	0.365394
MosOpn3	Control	1	5	0.541324
MosOpn3	Control	2	1	1
MosOpn3	Control	2	2	0.509145
MosOpn3	Control	2	3	0.834719
MosOpn3	Control	2	4	0.503824
MosOpn3	Control	2	5	0.324909
MosOpn3	Control	3	1	1
MosOpn3	Control	3	2	0.930568
MosOpn3	Control	3	3	1.03697
MosOpn3	Control	3	4	0.993688
MosOpn3	Control	3	5	0.965735
MosOpn3	Control	4	1	1
MosOpn3	Control	4	2	0.748737
MosOpn3	Control	4	3	0.995531
MosOpn3	Control	4	4	0.561601
MosOpn3	Control	4	5	0.502526

## Sheet: G
Line	BaCl2 or Control	Sample_number	Trial	Arrest time ratio
PufTMT	BaCl2	1	1	1
PufTMT	BaCl2	1	2	0.716381
PufTMT	BaCl2	1	3	0.826406
PufTMT	BaCl2	1	4	0
PufTMT	BaCl2	1	5	0
PufTMT	BaCl2	2	1	1
PufTMT	BaCl2	2	2	0.298795
PufTMT	BaCl2	2	3	0.139759
PufTMT	BaCl2	2	4	0
PufTMT	BaCl2	2	5	0
PufTMT	BaCl2	3	1	1
PufTMT	BaCl2	3	2	0.702624
PufTMT	BaCl2	3	3	0.372919
PufTMT	BaCl2	3	4	0
PufTMT	BaCl2	3	5	0
PufTMT	BaCl2	4	1	1
PufTMT	BaCl2	4	2	0.181371
PufTMT	BaCl2	4	3	0
PufTMT	BaCl2	4	4	0
PufTMT	BaCl2	4	5	0
PufTMT	Control	1	1	1
PufTMT	Control	1	2	0.222635
PufTMT	Control	1	3	0.30334
PufTMT	Control	1	4	0.185529
PufTMT	Control	1	5	0.185529
PufTMT	Control	2	1	1
PufTMT	Control	2	2	0.514301
PufTMT	Control	2	3	0.368435
PufTMT	Control	2	4	0.627925
PufTMT	Control	2	5	0.51014
PufTMT	Control	3	1	1
PufTMT	Control	3	2	0.818729
PufTMT	Control	3	3	0.638661
PufTMT	Control	3	4	0.306998
PufTMT	Control	3	5	0.731301
PufTMT	Control	4	1	1
PufTMT	Control	4	2	0.600967
PufTMT	Control	4	3	0.310152
PufTMT	Control	4	4	0.132205
PufTMT	Control	4	5	0.111566

## Sheet: H
Line	BaCl2 or Control	Sample_number	Trial	Arrest time ratio
LamPP	BaCl2	1	1	1
LamPP	BaCl2	1	2	0.683333
LamPP	BaCl2	1	3	0.709821
LamPP	BaCl2	1	4	0.0288691
LamPP	BaCl2	1	5	0
LamPP	BaCl2	2	1	1
LamPP	BaCl2	2	2	0.684444
LamPP	BaCl2	2	3	0.513333
LamPP	BaCl2	2	4	0
LamPP	BaCl2	2	5	0
LamPP	BaCl2	3	1	1
LamPP	BaCl2	3	2	0.788051
LamPP	BaCl2	3	3	0.354196
LamPP	BaCl2	3	4	0
LamPP	BaCl2	3	5	0
LamPP	BaCl2	4	1	1
LamPP	BaCl2	4	2	0.993048
LamPP	BaCl2	4	3	0.515643
LamPP	BaCl2	4	4	0
LamPP	BaCl2	4	5	0
LamPP	Control	1	1	1
LamPP	Control	1	2	0.678551
LamPP	Control	1	3	0.786659
LamPP	Control	1	4	0.776883
LamPP	Control	1	5	0.36199
LamPP	Control	2	1	1
LamPP	Control	2	2	1.08605
LamPP	Control	2	3	1.30707
LamPP	Control	2	4	0.406703
LamPP	Control	2	5	0.946558
LamPP	Control	3	1	1
LamPP	Control	3	2	0.617162
LamPP	Control	3	3	0.913091
LamPP	Control	3	4	1.12761
LamPP	Control	3	5	0.360836
LamPP	Control	4	1	1
LamPP	Control	4	2	0.87725
LamPP	Control	4	3	1.13093
LamPP	Control	4	4	1.11498
LamPP	Control	4	5	0.529051
